# Supplementary material
Source: PubMed Central journal article supplement (PMC2816016)
Supplement: M900134-MCP200_1.pdf [file M900134-MCP200_1.pdf]

**Supplementary Table 1.** Clinical and pathological characteristics of lung cancer patients for Osteoprotegerin measurement by ELISA

|                              | <b>Controls</b> | <b>Cases</b> |
|------------------------------|-----------------|--------------|
| <b>Smoking status</b>        |                 |              |
| Yes                          | 07              | 17           |
| No <sup>1</sup>              | 17              | 08           |
| x <sup>2</sup>               | 01              |              |
| <b>Gender</b>                |                 |              |
| Female                       | 15              | 10           |
| Male                         | 10              | 15           |
| <b>Age</b>                   |                 |              |
| Mean                         | 42              | 62           |
| SD                           | 09              | 14           |
| <b>Stage</b>                 |                 |              |
| III                          |                 | 03           |
| IV                           |                 | 22           |
| <b>Histology<sup>3</sup></b> |                 |              |
| ADC                          |                 | 08           |
| SCC                          |                 | 06           |
| BAC                          |                 | 01           |
| LCC                          |                 | 01           |
| Unspecified NSCLC            |                 | 09           |

<sup>1</sup>. < 100 cigarettes/lifetime.

<sup>2</sup>. x, unknown.

<sup>3</sup>. ADC, adenocarcinoma; SCC, squamous cell carcinoma; BAC, bronchioloalveolar carcinoma; LCC, large cell carcinoma; NSCLC, non-small cell lung carcinoma.

**Supplementary Table 2.** Clinical and pathological characteristics of lung cancer patients for sTNF RI measurement by ELISA

|                              | <b>Controls</b> | <b>Cases</b> |
|------------------------------|-----------------|--------------|
| <b>Smoking status</b>        |                 |              |
| Yes                          | 07              | 16           |
| No <sup>1</sup>              | 14              | 09           |
| x <sup>2</sup>               | 04              |              |
| <b>Gender</b>                |                 |              |
| Female                       | 08              | 11           |
| Male                         | 17              | 14           |
| <b>Age</b>                   |                 |              |
| Mean                         | 36              | 62           |
| SD                           | 08              | 11           |
| <b>Stage</b>                 |                 |              |
| III                          |                 | 04           |
| IV                           |                 | 20           |
| x <sup>2</sup>               |                 | 01           |
| <b>Histology<sup>3</sup></b> |                 |              |
| ADC                          |                 | 14           |
| SCC                          |                 | 04           |
| BAC                          |                 | 01           |
| Unspecified NSCLC            |                 | 06           |

<sup>1</sup>.< 100 cigarettes/lifetime.

<sup>2</sup>. x, unknown.

<sup>3</sup>. ADC, adenocarcinoma; SCC, squamous cell carcinoma; BAC, bronchioloalveolar carcinoma; NSCLC, non-small cell lung carcinoma.

**Supplementary Table 3.** Clinical and pathological characteristics of lung cancer patients for

Follistatin measurement by ELISA

|                              | <b>Controls</b> | <b>Cases</b> |
|------------------------------|-----------------|--------------|
| <b>Smoking status</b>        |                 |              |
| Yes                          | 07              | 17           |
| No <sup>1</sup>              | 17              | 08           |
| x <sup>2</sup>               | 01              |              |
| <b>Gender</b>                |                 |              |
| Female                       | 15              | 10           |
| Male                         | 10              | 15           |
| <b>Age</b>                   |                 |              |
| Mean                         | 42              | 62           |
| SD                           | 09              | 14           |
| <b>Stage</b>                 |                 |              |
| III                          |                 | 02           |
| IV                           |                 | 23           |
| <b>Histology<sup>3</sup></b> |                 |              |
| ADC                          |                 | 08           |
| SCC                          |                 | 06           |
| LCC                          |                 | 01           |
| Unspecified NSCLC            |                 | 10           |

<sup>1</sup>. < 100 cigarettes/lifetime.

<sup>2</sup>. x, unknown.

<sup>3</sup>. ADC, adenocarcinoma; SCC, squamous cell carcinoma; LCC, large cell carcinoma;

NSCLC, non-small cell lung carcinoma.

**Supplementary Table 4.** Clinical and pathological characteristics of lung cancer patients for ADAM-17 measurement by ELISA

|                              | <b>Controls</b> | <b>Cases</b> |
|------------------------------|-----------------|--------------|
| <b>Smoking status</b>        |                 |              |
| Yes                          | 04              | 15           |
| No <sup>1</sup>              | 16              | 06           |
| x <sup>2</sup>               | 01              |              |
| <b>Gender</b>                |                 |              |
| Female                       | 14              | 08           |
| Male                         | 07              | 13           |
| <b>Age</b>                   |                 |              |
| Mean                         | 41              | 61           |
| SD                           | 09              | 13           |
| <b>Stage</b>                 |                 |              |
| III                          |                 | 03           |
| IV                           |                 | 18           |
| <b>Histology<sup>3</sup></b> |                 |              |
| ADC                          |                 | 07           |
| SCC                          |                 | 06           |
| BAC                          |                 | 01           |
| LCC                          |                 | 01           |
| Unspecified NSCLC            |                 | 06           |

<sup>1</sup>. < 100 cigarettes/lifetime.

<sup>2</sup>. x, unknown.

<sup>3</sup>. ADC, adenocarcinoma; SCC, squamous cell carcinoma; BAC, bronchioloalveolar carcinoma; LCC, large cell carcinoma; NSCLC, non-small cell lung carcinoma.

**Supplementary Table 5.** Clinical and pathological characteristics of lung cancer patients for Pentraxin 3 by ELISA

|                              | <b>Controls</b> | <b>Cases</b> |
|------------------------------|-----------------|--------------|
| <b>Smoking status</b>        |                 |              |
| Yes                          | 08              | 19           |
| No <sup>1</sup>              | 15              | 06           |
| x <sup>2</sup>               | 02              |              |
| <b>Gender</b>                |                 |              |
| Female                       | 08              | 12           |
| Male                         | 17              | 13           |
| <b>Age</b>                   |                 |              |
| Mean                         | 34              | 64           |
| SD                           | 09              | 10           |
| <b>Stage</b>                 |                 |              |
| III                          |                 | 05           |
| IV                           |                 | 19           |
| x <sup>2</sup>               |                 | 01           |
| <b>Histology<sup>3</sup></b> |                 |              |
| ADC                          |                 | 10           |
| SCC                          |                 | 06           |
| Unspecified NSCLC            |                 | 09           |

<sup>1</sup>. < 100 cigarettes/lifetime.

<sup>2</sup>. x, unknown.

<sup>3</sup>. ADC, adenocarcinoma; SCC, squamous cell carcinoma; NSCLC, non-small cell lung carcinoma.

## Supplementary Table 6: List of proteins identified by mass spectrometry i

| Protein name                                                                                   |
|------------------------------------------------------------------------------------------------|
| Gene_Symbol=- 12 kDa protein                                                                   |
| Gene_Symbol=- 23 kDa protein                                                                   |
| Gene_Symbol=- 25 kDa protein                                                                   |
| Gene_Symbol=- 31 kDa protein                                                                   |
| Gene_Symbol=- 35 kDa protein                                                                   |
| Gene_Symbol=- 71 kDa protein                                                                   |
| Gene_Symbol=- Novel protein similar to Pre-B cell enhancing factor                             |
| Gene_Symbol=- P37 AUF1                                                                         |
| Gene_Symbol=- P40                                                                              |
| Gene_Symbol=- Protein                                                                          |
| Gene_Symbol=AARS Alanyl-tRNA synthetase, cytoplasmic                                           |
| Gene_Symbol=ABCE1 ATP-binding cassette sub-family E member 1                                   |
| Gene_Symbol=ACAT2 Acetyl-CoA acetyltransferase, cytosolic                                      |
| Gene_Symbol=ACLY ATP-citrate synthase                                                          |
| Gene_Symbol=ACOT7 Isoform 2 of Cytosolic acyl coenzyme A thioester hydrolase                   |
| Gene_Symbol=ACP1 Isoform 1 of Low molecular weight phosphotyrosine protein phosphatase         |
| Gene_Symbol=ACTA1 Actin, alpha skeletal muscle                                                 |
| Gene_Symbol=ACTB Actin, cytoplasmic 1                                                          |
| Gene_Symbol=ACTN1 Alpha-actinin-1                                                              |
| Gene_Symbol=ACTN4 Alpha-actinin-4                                                              |
| Gene_Symbol=ACTR2 actin-related protein 2 isoform a                                            |
| Gene_Symbol=ACTR3 Actin-like protein 3                                                         |
| Gene_Symbol=ADAM10 ADAM 10 precursor                                                           |
| Gene_Symbol=ADAM17 Isoform A of ADAM 17 precursor                                              |
| Gene_Symbol=ADAM19 Isoform A of ADAM 19 precursor                                              |
| Gene_Symbol=ADAM9 Isoform 1 of ADAM 9 precursor                                                |
| Gene_Symbol=ADAMTS12 ADAM metalloproteinase with thrombospondin type 1 motif, 12 preproprotein |
| Gene_Symbol=ADAMTS19 ADAMTS-19 precursor                                                       |
| Gene_Symbol=ADAMTSL1 ADAMTS-like 1 isoform 1                                                   |
| Gene_Symbol=ADH5 Class III alCohol dehydrogenase 5 Chi subunit                                 |
| Gene_Symbol=ADI1 Isoform 1 of 1,2-dihydroxy-3-keto-5-methylthiopentene dioxygenase             |
| Gene_Symbol=ADK Isoform Short of Adenosine kinase                                              |
| Gene_Symbol=ADSS Adenylosuccinate synthetase isozyme 2                                         |
| Gene_Symbol=AGRN Agrin precursor                                                               |
| Gene_Symbol=AHCY Adenosylhomocysteinase                                                        |
| Gene_Symbol=AHSA1 Activator of 90 kDa heat shock protein ATPase homolog 1                      |
| Gene_Symbol=AK2 Isoform 1 of Adenylate kinase isoenzyme 2, mitochondrial                       |
| Gene_Symbol=AKR1A1 Alcohol dehydrogenase                                                       |
| Gene_Symbol=AKR1B1 Aldose reductase                                                            |
| Gene_Symbol=AKR1C1 Aldo-keto reductase family 1 member C1                                      |
| Gene_Symbol=ALB ALB protein                                                                    |
| Gene_Symbol=ALCAM Isoform 1 of CD166 antigen precursor                                         |
| Gene_Symbol=ALDH1A1 Retinal dehydrogenase 1                                                    |
| Gene_Symbol=ALDH3A1 Aldehyde dehydrogenase, dimeric NADP-preferring                            |
| Gene_Symbol=ALDOA Fructose-bisphosphate aldolase A                                             |
| Gene_Symbol=ALDOC Fructose-bisphosphate aldolase C                                             |
| Gene_Symbol=ANP32A Acidic leucine-rich nuclear phosphoprotein 32 family member A               |
| Gene_Symbol=ANP32B Isoform 1 of Acidic leucine-rich nuclear phosphoprotein 32 family member B  |
| Gene_Symbol=ANXA2 annexin A2 isoform 1                                                         |
| Gene_Symbol=ANXA5 Annexin A5                                                                   |
| Gene_Symbol=APEH Acylamino-acid-releasing enzyme                                               |
| Gene_Symbol=APEX1 DNA-(apurinic or apyrimidinic site) lyase                                    |
| Gene_Symbol=APLP2 Isoform 1 of Amyloid-like protein 2 precursor                                |
| Gene_Symbol=APOA1BP apolipoprotein A-I binding protein precursor                               |
| Gene_Symbol=APP Isoform APP770 of Amyloid beta A4 protein precursor (Fragment)                 |

|                                                                                                      |
|------------------------------------------------------------------------------------------------------|
| Gene_Symbol=APRT Adenine phosphoribosyltransferase                                                   |
| Gene_Symbol=ARF1 ADP-ribosylation factor 1                                                           |
| Gene_Symbol=ARHGDI20 20 kDa protein                                                                  |
| Gene_Symbol=ARTS-1 type 1 tumor necrosis factor receptor shedding aminopeptidase regulator isoform a |
| Gene_Symbol=ATIC Bifunctional purine biosynthesis protein PURH                                       |
| Gene_Symbol=ATP1A1 Isoform Long of Sodium/potassium-transporting ATPase alpha-1 chain precursor      |
| Gene_Symbol=ATP1A2 Sodium/potassium-transporting ATPase alpha-2 chain precursor                      |
| Gene_Symbol=ATP1B3 Sodium/potassium-transporting ATPase subunit beta-3                               |
| Gene_Symbol=ATP6AP1 53 kDa protein                                                                   |
| Gene_Symbol=ATP6AP2 Renin receptor precursor                                                         |
| Gene_Symbol=ATP6V1B2 Vacuolar ATP synthase subunit B, brain isoform                                  |
| Gene_Symbol=ATP6V1G2;BAT1 BAT1 protein                                                               |
| Gene_Symbol=AZGP1 alpha-2-glycoprotein 1, zinc                                                       |
| Gene_Symbol=B2M Beta-2-microglobulin precursor                                                       |
| Gene_Symbol=B3GAT3 Galactosylgalactosylxylosylprotein 3-beta-glucuronosyltransferase 3               |
| Gene_Symbol=B3GNT1 N-acetyllactosaminide beta-1,3-N-acetylglucosaminyltransferase                    |
| Gene_Symbol=B4GALT1 Isoform Long of Beta-1,4-galactosyltransferase 1                                 |
| Gene_Symbol=B4GALT4 Beta-1,4-galactosyltransferase 4                                                 |
| Gene_Symbol=BCCIP BRCA2 and CDKN1A-interacting protein isoform C                                     |
| Gene_Symbol=BID Isoform 1 of BH3-interacting domain death agonist                                    |
| Gene_Symbol=BLMH Bleomycin hydrolase                                                                 |
| Gene_Symbol=BOLA2B;BOLA2 Bola-like protein 2 isoform a                                               |
| Gene_Symbol=BSG 46 kDa protein                                                                       |
| Gene_Symbol=BTF3 Isoform 2 of Transcription factor BTF3                                              |
| Gene_Symbol=BUB3 Mitotic checkpoint protein BUB3                                                     |
| Gene_Symbol=C11orf58 Small acidic protein                                                            |
| Gene_Symbol=C14orf166 Protein C14orf166                                                              |
| Gene_Symbol=C19orf10 Uncharacterized protein C19orf10 precursor                                      |
| Gene_Symbol=C1QBP Complement component 1 Q subcomponent-binding protein, mitochondrial precursor     |
| Gene_Symbol=C1R Complement C1r subcomponent precursor                                                |
| Gene_Symbol=C20orf77 Uncharacterized protein C20orf77                                                |
| Gene_Symbol=C22orf28 UPF0027 protein C22orf28                                                        |
| Gene_Symbol=C6orf15 Uncharacterized protein C6orf15 precursor                                        |
| Gene_Symbol=CA6 Carbonic anhydrase 6 precursor                                                       |
| Gene_Symbol=CACYBP Isoform 1 of Calcyclin-binding protein                                            |
| Gene_Symbol=CAD CAD protein                                                                          |
| Gene_Symbol=CADM1 Nectin-like protein 2                                                              |
| Gene_Symbol=CALM3;CALM2;CALM1 Calmodulin                                                             |
| Gene_Symbol=CALR Calreticulin precursor                                                              |
| Gene_Symbol=CALU Isoform 1 of Calumenin precursor                                                    |
| Gene_Symbol=CANT1 Isoform 1 of Soluble calcium-activated nucleotidase 1                              |
| Gene_Symbol=CANX Calnexin precursor                                                                  |
| Gene_Symbol=CAP1 Adenylyl cyclase-associated protein 1                                               |
| Gene_Symbol=CAPZA1 F-actin capping protein subunit alpha-1                                           |
| Gene_Symbol=CAPZB Capping protein (Actin filament) muscle Z-line, beta                               |
| Gene_Symbol=CARHSP1 Calcium-regulated heat stable protein 1                                          |
| Gene_Symbol=CARS cysteinyl-tRNA synthetase isoform c                                                 |
| Gene_Symbol=CAST Isoform 2 of Calpastatin                                                            |
| Gene_Symbol=CBFB Core-binding factor subunit beta                                                    |
| Gene_Symbol=CBR1 Carbonyl reductase [NADPH] 1                                                        |
| Gene_Symbol=CBX1 Chromobox protein homolog 1                                                         |
| Gene_Symbol=CBX3;LOC653972 Chromobox protein homolog 3                                               |
| Gene_Symbol=CCT2 T-complex protein 1 subunit beta                                                    |
| Gene_Symbol=CCT3 chaperonin containing TCP1, subunit 3 isoform b                                     |
| Gene_Symbol=CCT4 T-complex protein 1 subunit delta                                                   |
| Gene_Symbol=CCT5 T-complex protein 1 subunit epsilon                                                 |
| Gene_Symbol=CCT6A T-complex protein 1 subunit zeta                                                   |
| Gene_Symbol=CCT7 T-complex protein 1 subunit eta                                                     |
| Gene_Symbol=CCT8 Chaperonin containing TCP1, subunit 8 (Theta) variant                               |

|                                                                                               |
|-----------------------------------------------------------------------------------------------|
| Gene_Symbol=CD276 Isoform 1 of CD276 antigen precursor                                        |
| Gene_Symbol=CD44 Isoform 12 of CD44 antigen precursor                                         |
| Gene_Symbol=CD46 CD46 antigen, complement regulatory protein isoform 13 precursor             |
| Gene_Symbol=CD81 CD81 antigen                                                                 |
| Gene_Symbol=CD9 CD9 antigen                                                                   |
| Gene_Symbol=CDH1 Epithelial-cadherin precursor                                                |
| Gene_Symbol=CDH2 Cadherin-2 precursor                                                         |
| Gene_Symbol=CDH3 CDH3 protein                                                                 |
| Gene_Symbol=CDV3 Protein CDV3 homolog                                                         |
| Gene_Symbol=CES1 Isoform 2 of Liver carboxylesterase 1 precursor                              |
| Gene_Symbol=CFDP1 Isoform 1 of Craniofacial development protein 1                             |
| Gene_Symbol=CFL1 Cofilin-1                                                                    |
| Gene_Symbol=CHGB Secretogranin-1 precursor                                                    |
| Gene_Symbol=CHID1 Isoform 2 of Chitinase domain-containing protein 1 precursor                |
| Gene_Symbol=CHL1 Isoform 2 of Neural cell adhesion molecule L1-like protein precursor         |
| Gene_Symbol=CHORDC1 Cysteine and histidine-rich domain-containing protein 1                   |
| Gene_Symbol=CHRDL1 Ventroptin (Fragment)                                                      |
| Gene_Symbol=CIAPIN1 Isoform 3 of Anamorsin                                                    |
| Gene_Symbol=CIRBP 32 kDa protein                                                              |
| Gene_Symbol=CKB Creatine kinase B-type                                                        |
| Gene_Symbol=CLIC1 Chloride intracellular channel protein 1                                    |
| Gene_Symbol=CLIC4 Chloride intracellular channel protein 4                                    |
| Gene_Symbol=CLINT1 Isoform 1 of Clathrin interactor 1                                         |
| Gene_Symbol=CLSTN1 calsynenin 1 isoform 2                                                     |
| Gene_Symbol=CLSTN3 Alcadein beta                                                              |
| Gene_Symbol=CLTC Isoform 1 of Clathrin heavy chain 1                                          |
| Gene_Symbol=CMPK cytidylate kinase                                                            |
| Gene_Symbol=CNBP Isoform 2 of Cellular nucleic acid-binding protein                           |
| Gene_Symbol=CNDP2 PP856                                                                       |
| Gene_Symbol=CNN2 Calponin-2                                                                   |
| Gene_Symbol=CNN3 Calponin-3                                                                   |
| Gene_Symbol=CNTN1 Isoform 1 of Contactin-1 precursor                                          |
| Gene_Symbol=COCH Cochlin precursor                                                            |
| Gene_Symbol=COL18A1 alpha 1 type XVIII collagen isoform 1 precursor                           |
| Gene_Symbol=COL6A1 Collagen alpha-1(VI) chain precursor                                       |
| Gene_Symbol=COPB1 Coatomer subunit beta                                                       |
| Gene_Symbol=CORO1C Coronin-1C                                                                 |
| Gene_Symbol=CPE Carboxypeptidase E precursor                                                  |
| Gene_Symbol=CPNE1 59 kDa protein                                                              |
| Gene_Symbol=CPNE1;RBM12 RNA-binding protein 12                                                |
| Gene_Symbol=CPNE3 Copine-3                                                                    |
| Gene_Symbol=CPSF6 Isoform 1 of Cleavage and polyadenylation specificity factor 6              |
| Gene_Symbol=CRAMP1L;HN1L Isoform 1 of Hematological and neurological expressed 1-like protein |
| Gene_Symbol=CRK v-crk sarcoma virus CT10 oncogene homolog isoform b                           |
| Gene_Symbol=CRKL Crk-like protein                                                             |
| Gene_Symbol=CSE1L Isoform 1 of Exportin-2                                                     |
| Gene_Symbol=CSRP1 Cysteine and glycine-rich protein 1                                         |
| Gene_Symbol=CST1 Cystatin-SN precursor                                                        |
| Gene_Symbol=CST3 Cystatin-C precursor                                                         |
| Gene_Symbol=CSTB Cystatin-B                                                                   |
| Gene_Symbol=CSTF2 Isoform 1 of Cleavage stimulation factor 64 kDa subunit                     |
| Gene_Symbol=CTNNA1 Isoform 1 of Catenin alpha-1                                               |
| Gene_Symbol=CTNNB1 similar to Beta-catenin                                                    |
| Gene_Symbol=CTNND1 Isoform 1AB of Catenin delta-1                                             |
| Gene_Symbol=CTPS CTP synthase 1                                                               |
| Gene_Symbol=CTPS2 CTP synthase 2                                                              |
| Gene_Symbol=CTSC Dipeptidyl-peptidase 1 precursor                                             |
| Gene_Symbol=CTSD Cathepsin D precursor                                                        |
| Gene_Symbol=CTSZ Cathepsin Z precursor                                                        |



|                                                                                     |
|-------------------------------------------------------------------------------------|
| Gene_Symbol=CTTN Src substrate cortactin                                            |
| Gene_Symbol=CUL3 Isoform 1 of Cullin-3                                              |
| Gene_Symbol=CUTA Isoform A of Protein CutA precursor                                |
| Gene_Symbol=CXCL14 small inducible cytokine B14 precursor                           |
| Gene_Symbol=CYCS Cytochrome c                                                       |
| Gene_Symbol=CYFIP1 145 kDa protein                                                  |
| Gene_Symbol=D4ST1 Carbohydrate sulfotransferase D4ST1                               |
| Gene_Symbol=DAG1 Dystroglycan precursor                                             |
| Gene_Symbol=DBI Isoform a 1 of Acyl-CoA-binding protein                             |
| Gene_Symbol=DBN1 Drebrin                                                            |
| Gene_Symbol=DCTN2 dynactin 2                                                        |
| Gene_Symbol=DDB1 damage-specific DNA binding protein 1                              |
| Gene_Symbol=DDT D-dopachrome decarboxylase                                          |
| Gene_Symbol=DDX19A ATP-dependent RNA helicase DDX19A                                |
| Gene_Symbol=DDX39 ATP-dependent RNA helicase DDX39                                  |
| Gene_Symbol=DDX3X ATP-dependent RNA helicase DDX3X                                  |
| Gene_Symbol=DFFA Isoform DFF45 of DNA fragmentation factor subunit alpha (Fragment) |
| Gene_Symbol=DHX15 DEAH (Asp-Glu-Ala-His) box polypeptide 15                         |
| Gene_Symbol=DHX9 ATP-dependent RNA helicase A                                       |
| Gene_Symbol=DKFZp686D0972 hypothetical protein LOC345651                            |
| Gene_Symbol=DKFZp686O24166 Hypothetical protein DKFZp686I21167                      |
| Gene_Symbol=DNAJA1 DnaJ homolog subfamily A member 1                                |
| Gene_Symbol=DNAJA2 DnaJ homolog subfamily A member 2                                |
| Gene_Symbol=DNAJB1 DnaJ homolog subfamily B member 1                                |
| Gene_Symbol=DNAJB11 DnaJ homolog subfamily B member 11 precursor                    |
| Gene_Symbol=DNAJC8 DnaJ homolog subfamily C member 8                                |
| Gene_Symbol=DNASE2 Deoxyribonuclease-2-alpha precursor                              |
| Gene_Symbol=DNM1L Isoform 1 of Dynamin-1-like protein                               |
| Gene_Symbol=DNM2 Isoform 1 of Dynamin-2                                             |
| Gene_Symbol=DNPEP Hypothetical protein DNPEP                                        |
| Gene_Symbol=DPYSL3 DPYSL3 protein                                                   |
| Gene_Symbol=DSC2 Isoform 2A of Desmocollin-2 precursor                              |
| Gene_Symbol=DSG2 desmoglein 2 preproprotein                                         |
| Gene_Symbol=DSTN Destrin                                                            |
| Gene_Symbol=DUT 24 kDa protein                                                      |
| Gene_Symbol=DYNC1H1 Dynein heavy chain, cytosolic                                   |
| Gene_Symbol=DYNLL1 Dynein light chain 1, cytoplasmic                                |
| Gene_Symbol=EEF1A1 Elongation factor 1-alpha 1                                      |
| Gene_Symbol=EEF1B2 Elongation factor 1-beta                                         |
| Gene_Symbol=EEF1D eukaryotic translation elongation factor 1 delta isoform 1        |
| Gene_Symbol=EEF1G Elongation factor 1-gamma                                         |
| Gene_Symbol=EEF2 Elongation factor 2                                                |
| Gene_Symbol=EFTUD2 116 kDa U5 small nuclear ribonucleoprotein component             |
| Gene_Symbol=EHD4 EH domain-containing protein 4                                     |
| Gene_Symbol=EIF1 Eukaryotic translation initiation factor 1                         |
| Gene_Symbol=EIF2S1 Eukaryotic translation initiation factor 2 subunit 1             |
| Gene_Symbol=EIF2S3 Eukaryotic translation initiation factor 2 subunit 3             |
| Gene_Symbol=EIF3S1 Eukaryotic translation initiation factor 3 subunit 1             |
| Gene_Symbol=EIF3S2 Eukaryotic translation initiation factor 3 subunit 2             |
| Gene_Symbol=EIF3S3 Eukaryotic translation initiation factor 3 subunit 3             |
| Gene_Symbol=EIF3S4 Eukaryotic translation initiation factor 3 subunit 4             |
| Gene_Symbol=EIF3S6IP DJ1014D13.1 protein                                            |
| Gene_Symbol=EIF4A1 Eukaryotic initiation factor 4A-I                                |
| Gene_Symbol=EIF4B Eukaryotic translation initiation factor 4B                       |
| Gene_Symbol=EIF4E Similar to Eukaryotic translation initiation factor 4E            |
| Gene_Symbol=EIF5 Eukaryotic translation initiation factor 5                         |
| Gene_Symbol=EIF5A Isoform 2 of Eukaryotic translation initiation factor 5A-1        |
| Gene_Symbol=EIF5B Eukaryotic translation initiation factor 5B                       |
| Gene_Symbol=ELAVL1 ELAV-like protein 1                                              |

|                                                                                                           |
|-----------------------------------------------------------------------------------------------------------|
| Gene_Symbol=ENO1 Isoform alpha-enolase of Alpha-enolase                                                   |
| Gene_Symbol=ENPP2 Isoform 1 of Ectonucleotide pyrophosphatase/phosphodiesterase family member 2 precursor |
| Gene_Symbol=ENSA Isoform 2 of Alpha-endosulfine                                                           |
| Gene_Symbol=EPRS glutamyl-prolyl tRNA synthetase                                                          |
| Gene_Symbol=ERH Enhancer of rudimentary homolog                                                           |
| Gene_Symbol=ERP29 Endoplasmic reticulum protein ERp29 precursor                                           |
| Gene_Symbol=ESD S-formylglutathione hydrolase                                                             |
| Gene_Symbol=EWSR1 CDNA FLJ31747 fis, clone NT2RI2007377, highly similar to RNA-BINDING PROTEIN EWS        |
| Gene_Symbol=EXTL2 EXTL2 protein (Fragment)                                                                |
| Gene_Symbol=F11R Junctional adhesion molecule A precursor                                                 |
| Gene_Symbol=FAM3C Protein FAM3C precursor                                                                 |
| Gene_Symbol=FAM49B Protein FAM49B                                                                         |
| Gene_Symbol=FARSB Phenylalanyl-tRNA synthetase beta chain                                                 |
| Gene_Symbol=FASN fatty acid synthase                                                                      |
| Gene_Symbol=FBLN1 Isoform C of Fibulin-1 precursor                                                        |
| Gene_Symbol=FBLN1 Isoform D of Fibulin-1 precursor                                                        |
| Gene_Symbol=FBLN2 fibulin 2 precursor, isoform a                                                          |
| Gene_Symbol=FGF19 Fibroblast growth factor 19 precursor                                                   |
| Gene_Symbol=FGFBP1 Fibroblast growth factor-binding protein 1 precursor                                   |
| Gene_Symbol=FGFR1 Isoform 14 of Basic fibroblast growth factor receptor 1 precursor                       |
| Gene_Symbol=FGFRL1 Fibroblast growth factor receptor-like 1 precursor                                     |
| Gene_Symbol=FH Isoform Mitochondrial of Fumarate hydratase, mitochondrial precursor                       |
| Gene_Symbol=FKBP1A FKBP1A protein                                                                         |
| Gene_Symbol=FKBP3 FK506-binding protein 3                                                                 |
| Gene_Symbol=FKBP4 FK506-binding protein 4                                                                 |
| Gene_Symbol=FLJ10292 Protein mago nashi homolog 2                                                         |
| Gene_Symbol=FLJ11151 Hypothetical protein FLJ11151                                                        |
| Gene_Symbol=FLJ12684 hypothetical protein LOC79584                                                        |
| Gene_Symbol=FLNA Filamin-A                                                                                |
| Gene_Symbol=FN1 fibronectin 1 isoform 2 preproprotein                                                     |
| Gene_Symbol=FN1 Isoform 1 of Fibronectin precursor                                                        |
| Gene_Symbol=FRAS1 Isoform 2 of Extracellular matrix protein FRAS1 precursor                               |
| Gene_Symbol=FREM2 Isoform 1 of FRAS1-related extracellular matrix protein 2 precursor                     |
| Gene_Symbol=FSCN1 Fascin                                                                                  |
| Gene_Symbol=FSTL5 Follistatin-related protein 5 precursor                                                 |
| Gene_Symbol=FUBP1 Isoform 2 of Far upstream element-binding protein 1                                     |
| Gene_Symbol=FUCA2 Plasma alpha-L-fucosidase precursor                                                     |
| Gene_Symbol=FUS Fus-like protein (Fragment)                                                               |
| Gene_Symbol=FUSIP1 FUS interacting protein (Serine/arginine-rich) 1                                       |
| Gene_Symbol=G3BP1 Ras GTPase-activating protein-binding protein 1                                         |
| Gene_Symbol=G3BP2 Isoform A of Ras GTPase-activating protein-binding protein 2                            |
| Gene_Symbol=G6PD Isoform Long of Glucose-6-phosphate 1-dehydrogenase                                      |
| Gene_Symbol=GAA Lysosomal alpha-glucosidase precursor                                                     |
| Gene_Symbol=GAK Cyclin G-associated kinase                                                                |
| Gene_Symbol=GAL Galanin precursor                                                                         |
| Gene_Symbol=GALNT10 Isoform 1 of Polypeptide N-acetylgalactosaminyltransferase 10                         |
| Gene_Symbol=GALNT2 Polypeptide N-acetylgalactosaminyltransferase 2                                        |
| Gene_Symbol=GALNT6 Polypeptide N-acetylgalactosaminyltransferase 6                                        |
| Gene_Symbol=GANAB Isoform 2 of Neutral alpha-glucosidase AB precursor                                     |
| Gene_Symbol=GAPDH Glyceraldehyde-3-phosphate dehydrogenase                                                |
| Gene_Symbol=GARS GARS protein                                                                             |
| Gene_Symbol=GART Isoform Long of Trifunctional purine biosynthetic protein adenosine-3                    |
| Gene_Symbol=GBA Isoform Long of Glucosylceramidase precursor                                              |
| Gene_Symbol=GDF15 Growth/differentiation factor 15 precursor                                              |
| Gene_Symbol=GDI2 Rab GDP dissociation inhibitor beta                                                      |
| Gene_Symbol=GGH Gamma-glutamyl hydrolase precursor                                                        |
| Gene_Symbol=GIPC1 PDZ domain-containing protein GIPC1                                                     |
| Gene_Symbol=GJA10;MYCBP C-Myc-binding protein                                                             |
| Gene_Symbol=GLG1 golgi apparatus protein 1                                                                |

|                                                                                                                           |
|---------------------------------------------------------------------------------------------------------------------------|
| Gene_Symbol=GLO1 Lactoylglutathione lyase                                                                                 |
| Gene_Symbol=GM2A Ganglioside GM2 activator precursor                                                                      |
| Gene_Symbol=GMPS GMP synthase                                                                                             |
| Gene_Symbol=GNB1 Guanine nucleotide-binding protein G(I)/G(S)/G(T) subunit beta 1                                         |
| Gene_Symbol=GNB2L1 Lung cancer oncogene 7                                                                                 |
| Gene_Symbol=GNPDA1 Glucosamine-6-phosphate isomerase                                                                      |
| Gene_Symbol=GOLPH2 Isoform 2 of Golgi phosphoprotein 2                                                                    |
| Gene_Symbol=GOLPH4 golgi phosphoprotein 4                                                                                 |
| Gene_Symbol=GORASP2 Isoform 2 of Golgi reassembly-stacking protein 2                                                      |
| Gene_Symbol=GOT1 Aspartate aminotransferase, cytoplasmic                                                                  |
| Gene_Symbol=GOT2 Aspartate aminotransferase, mitochondrial precursor                                                      |
| Gene_Symbol=GPC1 Glypican-1 precursor                                                                                     |
| Gene_Symbol=GPC4 Glypican-4 precursor                                                                                     |
| Gene_Symbol=GPI Glucose-6-phosphate isomerase                                                                             |
| Gene_Symbol=GPIAP1 GPI-anchored membrane protein 1                                                                        |
| Gene_Symbol=GPR56 G protein-coupled receptor 56 isoform b                                                                 |
| Gene_Symbol=GPX3 Glutathione peroxidase 3 precursor                                                                       |
| Gene_Symbol=GRB2 Isoform 1 of Growth factor receptor-bound protein 2                                                      |
| Gene_Symbol=GRHPR Glyoxylate reductase/hydroxypyruvate reductase                                                          |
| Gene_Symbol=GSN Isoform 1 of Gelsolin precursor                                                                           |
| Gene_Symbol=GSPT1 G1 to S phase transition protein 1 homolog                                                              |
| Gene_Symbol=GSR Isoform Mitochondrial of Glutathione reductase, mitochondrial precursor                                   |
| Gene_Symbol=GSS Glutathione synthetase                                                                                    |
| Gene_Symbol=GSTP1 Glutathione S-transferase P                                                                             |
| Gene_Symbol=GTPBP9 Isoform 1 of Putative GTP-binding protein 9                                                            |
| Gene_Symbol=HARS Histidyl-tRNA synthetase, cytoplasmic                                                                    |
| Gene_Symbol=HBA1;HBA2 Hemoglobin subunit alpha                                                                            |
| Gene_Symbol=HBE1 Hemoglobin subunit epsilon                                                                               |
| Gene_Symbol=hCG_2015138 similar to Phosphoglycerate mutase 1 (Phosphoglycerate mutase isozyme B) (PGAM-B) (BPG-dependent) |
| Gene_Symbol=hCG_2028557 similar to unactive progesterone receptor, 23 kD                                                  |
| Gene_Symbol=HDGF Hepatoma-derived growth factor                                                                           |
| Gene_Symbol=HEXA Beta-hexosaminidase alpha chain precursor                                                                |
| Gene_Symbol=HINT1 Histidine triad nucleotide-binding protein 1                                                            |
| Gene_Symbol=HIP2 Isoform 2 of Ubiquitin-conjugating enzyme E2-25 kDa                                                      |
| Gene_Symbol=HIST1H4C;HIST2H4B;HIST2H4A;HIST1H4H;HIST1H4F;HIST1H4L;HIST1H4J;HIST1H4B;HIST1H4I;HIST1H4D;HIST4H              |
| Gene_Symbol=HIST2H2AC Histone H2A type 2-C                                                                                |
| Gene_Symbol=HK2 Hexokinase-2                                                                                              |
| Gene_Symbol=HLA-A HLA class I histocompatibility antigen, A-2 alpha chain precursor                                       |
| Gene_Symbol=HLA-A Isoform 2 of HLA class I histocompatibility antigen, A-11 alpha chain precursor                         |
| Gene_Symbol=HLA-C;HLA-B;MICA;LOC730410 HLA class I histocompatibility antigen, B-56 alpha chain precursor                 |
| Gene_Symbol=HLA-C;HLA-B;MICA;LOC730410 Isoform 2 of HLA class I histocompatibility antigen, Cw-16 alpha chain precursor   |
| Gene_Symbol=HLA-C;HLA-B;MICA;LOC730410 Major histocompatibility complex, class I, C                                       |
| Gene_Symbol=HLA-C;HLA-B;MICA;LOC730410 MHC class I antigen heavy chain                                                    |
| Gene_Symbol=HLA-C;HLA-B;MICA;LOC730410 MHC class I chain-related protein A                                                |
| Gene_Symbol=HLA-H HLA class I histocompatibility antigen, alpha chain H precursor                                         |
| Gene_Symbol=HMBS Isoform 1 of Porphobilinogen deaminase                                                                   |
| Gene_Symbol=HMGB1 High mobility group protein B1                                                                          |
| Gene_Symbol=HMGB2 High mobility group protein B2                                                                          |
| Gene_Symbol=HMGB3 High mobility group protein B3                                                                          |
| Gene_Symbol=HN1 Isoform 2 of Hematological and neurological expressed 1 protein                                           |
| Gene_Symbol=HNRPA1;HNRPA1L-2 Isoform A1-B of Heterogeneous nuclear ribonucleoprotein A1                                   |
| Gene_Symbol=HNRPA2B1 Isoform B1 of Heterogeneous nuclear ribonucleoproteins A2/B1                                         |
| Gene_Symbol=HNRPA3 Isoform 3 of Heterogeneous nuclear ribonucleoprotein A/B                                               |
| Gene_Symbol=HNRPC Isoform C1 of Heterogeneous nuclear ribonucleoproteins C1/C2                                            |
| Gene_Symbol=HNRPD heterogenous nuclear ribonucleoprotein D-like                                                           |
| Gene_Symbol=HNRPF Heterogeneous nuclear ribonucleoprotein F                                                               |
| Gene_Symbol=HNRPH1 HNRPH1 protein                                                                                         |
| Gene_Symbol=HNRPH2 Heterogeneous nuclear ribonucleoprotein H'                                                             |
| Gene_Symbol=HNRPH3 Isoform 1 of Heterogeneous nuclear ribonucleoprotein H3                                                |

|                                                                                                              |
|--------------------------------------------------------------------------------------------------------------|
| Gene_Symbol=HNRPK Heterogeneous nuclear ribonucleoprotein K                                                  |
| Gene_Symbol=HNRPL heterogeneous nuclear ribonucleoprotein L isoform a                                        |
| Gene_Symbol=HNRPM Isoform 1 of Heterogeneous nuclear ribonucleoprotein M                                     |
| Gene_Symbol=HNRPR Heterogeneous nuclear ribonucleoprotein R                                                  |
| Gene_Symbol=HNRPU heterogeneous nuclear ribonucleoprotein U isoform a                                        |
| Gene_Symbol=HPRT1 Hypoxanthine-guanine phosphoribosyltransferase                                             |
| Gene_Symbol=HRB Isoform 2 of Nucleoporin-like protein RIP                                                    |
| Gene_Symbol=HSP90AB1 85 kDa protein                                                                          |
| Gene_Symbol=HSP90B1 Endoplasmic precursor                                                                    |
| Gene_Symbol=HSPA1B;HSPA1A Heat shock 70 kDa protein 1                                                        |
| Gene_Symbol=HSPA4 Heat shock 70 kDa protein 4                                                                |
| Gene_Symbol=HSPA5 HSPA5 protein                                                                              |
| Gene_Symbol=HSPA8 Isoform 1 of Heat shock cognate 71 kDa protein                                             |
| Gene_Symbol=HSPA9 Stress-70 protein, mitochondrial precursor                                                 |
| Gene_Symbol=HSPD1 61 kDa protein                                                                             |
| Gene_Symbol=HSPE1 10 kDa heat shock protein, mitochondrial                                                   |
| Gene_Symbol=HSPH1 97 kDa protein                                                                             |
| Gene_Symbol=HSPH1 Isoform Beta of Heat-shock protein 105 kDa                                                 |
| Gene_Symbol=HTRA1 Serine protease HTRA1 precursor                                                            |
| Gene_Symbol=HYAL1 Isoform 2 of Hyaluronidase-1 precursor                                                     |
| Gene_Symbol=HYOU1 150 kDa oxygen-regulated protein precursor                                                 |
| Gene_Symbol=IARS Isoleucyl-tRNA synthetase, cytoplasmic                                                      |
| Gene_Symbol=IDE Insulin-degrading enzyme                                                                     |
| Gene_Symbol=IDH1 Isocitrate dehydrogenase [NADP] cytoplasmic                                                 |
| Gene_Symbol=IGF1 Insulin-like growth factor IB precursor                                                     |
| Gene_Symbol=IGFBP2 Insulin-like growth factor-binding protein 2 precursor                                    |
| Gene_Symbol=IGFBP3 Insulin-like growth factor-binding protein 3 precursor                                    |
| Gene_Symbol=IGFBP5 Insulin-like growth factor-binding protein 5 precursor                                    |
| Gene_Symbol=IGFBPL1 Insulin-like growth factor binding protein-like 1                                        |
| Gene_Symbol=IGSF8 Isoform 1 of Immunoglobulin superfamily member 8 precursor                                 |
| Gene_Symbol=IL13RA1 Interleukin-13 receptor alpha-1 chain precursor                                          |
| Gene_Symbol=IL1R2 Interleukin-1 receptor type II precursor                                                   |
| Gene_Symbol=ILF2 Interleukin enhancer-binding factor 2                                                       |
| Gene_Symbol=ILF3 Isoform 1 of Interleukin enhancer-binding factor 3                                          |
| Gene_Symbol=ILKAP Integrin-linked kinase-associated serine/threonine phosphatase 2C                          |
| Gene_Symbol=IMPDH2 Inosine-5'-monophosphate dehydrogenase 2                                                  |
| Gene_Symbol=IPO7 120 kDa protein                                                                             |
| Gene_Symbol=IQGAP1 Ras GTPase-activating-like protein IQGAP1                                                 |
| Gene_Symbol=ITM2B Integral membrane protein 2B                                                               |
| Gene_Symbol=JAG1 Jagged-1 precursor                                                                          |
| Gene_Symbol=KARS Lysyl-tRNA synthetase                                                                       |
| Gene_Symbol=KHDRBS1 Isoform 1 of KH domain-containing, RNA-binding, signal transduction-associated protein 1 |
| Gene_Symbol=KHSRP KH-type splicing regulatory protein                                                        |
| Gene_Symbol=KIF5B Kinesin heavy chain                                                                        |
| Gene_Symbol=KITLG Isoform 2 of Kit ligand precursor                                                          |
| Gene_Symbol=KPNA2 Importin alpha-2 subunit                                                                   |
| Gene_Symbol=KPNA4 Importin alpha-4 subunit                                                                   |
| Gene_Symbol=KPNB1 Importin beta-1 subunit                                                                    |
| Gene_Symbol=KREMEN1 Isoform 1 of Kremen protein 1 precursor                                                  |
| Gene_Symbol=KRT1 Keratin, type II cytoskeletal 1                                                             |
| Gene_Symbol=KRT18 49 kDa protein                                                                             |
| Gene_Symbol=KRT19 Keratin, type I cytoskeletal 19                                                            |
| Gene_Symbol=KRT3 Keratin, type II cytoskeletal 3                                                             |
| Gene_Symbol=KRT8 Keratin, type II cytoskeletal 8                                                             |
| Gene_Symbol=KRT9 Keratin, type I cytoskeletal 9                                                              |
| Gene_Symbol=LAMA5 400 kDa protein                                                                            |
| Gene_Symbol=LAMC1 Laminin subunit gamma-1 precursor                                                          |
| Gene_Symbol=LAMP2 Isoform LAMP-2A of Lysosome-associated membrane glycoprotein 2 precursor                   |
| Gene_Symbol=LAP3 Isoform 1 of Cytosol aminopeptidase                                                         |

|                                                                                                      |
|------------------------------------------------------------------------------------------------------|
| Gene_Symbol=LDHA Isoform 1 of L-lactate dehydrogenase A chain                                        |
| Gene_Symbol=LDHB L-lactate dehydrogenase B chain                                                     |
| Gene_Symbol=LDLR Low-density lipoprotein receptor                                                    |
| Gene_Symbol=LFNG Isoform 1 of Beta-1,3-N-acetylglucosaminyltransferase lunatic fringe                |
| Gene_Symbol=LGALS1 Galectin-1                                                                        |
| Gene_Symbol=LGALS3 Galectin-3                                                                        |
| Gene_Symbol=LGALS3BP Galectin-3-binding protein precursor                                            |
| Gene_Symbol=LGMN Legumain precursor                                                                  |
| Gene_Symbol=LMAN2 Vesicular integral-membrane protein VIP36 precursor                                |
| Gene_Symbol=LMNA Isoform A of Lamin-A/C                                                              |
| Gene_Symbol=LMNB1 Lamin-B1                                                                           |
| Gene_Symbol=LMNB2 Lamin B2                                                                           |
| Gene_Symbol=LOC389842 similar to Ran-specific GTPase-activating protein                              |
| Gene_Symbol=LOC440055 similar to ribosomal protein S12                                               |
| Gene_Symbol=LOC51035 Isoform 1 of SAPK substrate protein 1                                           |
| Gene_Symbol=LOC653269 similar to Prostate, ovary, testis expressed protein on chromosome 2 isoform 2 |
| Gene_Symbol=LOC653994;EIF4H Isoform Long of Eukaryotic translation initiation factor 4H              |
| Gene_Symbol=LOC728641;FABP5;LOC731043 Fatty acid-binding protein, epidermal                          |
| Gene_Symbol=LOC84661 Dpy-30-like protein                                                             |
| Gene_Symbol=LOXL2;ENTPD4 Lysyl oxidase homolog 2 precursor                                           |
| Gene_Symbol=LPHN1 Isoform 1 of Latrophilin-1 precursor                                               |
| Gene_Symbol=LRRC47 Leucine-rich repeat-containing protein 47                                         |
| Gene_Symbol=LRRTM1 Leucine-rich repeat transmembrane neuronal protein 1 precursor                    |
| Gene_Symbol=LSR Isoform 1 of Lipolysis-stimulated lipoprotein receptor                               |
| Gene_Symbol=LTA4H Isoform 1 of Leukotriene A-4 hydrolase                                             |
| Gene_Symbol=LTBP3 Isoform 1 of Latent-transforming growth factor beta-binding protein 3 precursor    |
| Gene_Symbol=LUC7L2 Isoform 1 of Putative RNA-binding protein Luc7-like 2                             |
| Gene_Symbol=M6PRBP1 Isoform B of Mannose-6-phosphate receptor-binding protein 1                      |
| Gene_Symbol=MACF1 Microtubule-actin cross-linking factor 1, isoform 4                                |
| Gene_Symbol=MAGEA4 Melanoma-associated antigen 4                                                     |
| Gene_Symbol=MAN1A1 Mannosyl-oligosaccharide 1,2-alpha-mannosidase IA                                 |
| Gene_Symbol=MAN2A1 Alpha-mannosidase 2                                                               |
| Gene_Symbol=MAP1B Microtubule-associated protein 1B                                                  |
| Gene_Symbol=MAP2K1 Dual specificity mitogen-activated protein kinase kinase 1                        |
| Gene_Symbol=MAP4 Isoform 2 of Microtubule-associated protein 4                                       |
| Gene_Symbol=MAPK1 Mitogen-activated protein kinase 1                                                 |
| Gene_Symbol=MAPRE1 Microtubule-associated protein RP/EB family member 1                              |
| Gene_Symbol=MARCKS Myristoylated alanine-rich C-kinase substrate                                     |
| Gene_Symbol=MARCKSL1 MARCKS-related protein                                                          |
| Gene_Symbol=MAT2A S-adenosylmethionine synthetase isoform type-2                                     |
| Gene_Symbol=MAT2B methionine adenosyltransferase II, beta isoform 1                                  |
| Gene_Symbol=MATN2 Isoform 2 of Matrilin-2 precursor                                                  |
| Gene_Symbol=MATN3 Matrilin-3 precursor                                                               |
| Gene_Symbol=MATR3 100 kDa protein                                                                    |
| Gene_Symbol=MCM3 DNA replication licensing factor MCM3                                               |
| Gene_Symbol=MCM4 DNA replication licensing factor MCM4                                               |
| Gene_Symbol=MCM6 DNA replication licensing factor MCM6                                               |
| Gene_Symbol=MDH1 Malate dehydrogenase, cytoplasmic                                                   |
| Gene_Symbol=MDK Midkine precursor                                                                    |
| Gene_Symbol=ME1 NADP-dependent malic enzyme                                                          |
| Gene_Symbol=MFAP2 Microfibrillar-associated protein 2 precursor                                      |
| Gene_Symbol=MFGE8 Lactadherin precursor                                                              |
| Gene_Symbol=MGAT5 Alpha-1,6-mannosylglycoprotein 6-beta-N-acetylglucosaminyltransferase V            |
| Gene_Symbol=MGC11102 CDNA FLJ36810 fis, clone ASTRO2001249                                           |
| Gene_Symbol=MICB MHC class I antigen                                                                 |
| Gene_Symbol=MIF Macrophage migration inhibitory factor                                               |
| Gene_Symbol=MINPP1 Isoform 1 of Multiple inositol polyphosphate phosphatase 1 precursor              |
| Gene_Symbol=MKI67 Isoform Long of Antigen KI-67                                                      |
| Gene_Symbol=MLLT4 Isoform 4 of Afadin                                                                |

|                                                                                                     |
|-----------------------------------------------------------------------------------------------------|
| Gene_Symbol=MMP2 72 kDa type IV collagenase precursor                                               |
| Gene_Symbol=MRPS16;DNAJC9 DnaJ homolog subfamily C member 9                                         |
| Gene_Symbol=MSN Moesin                                                                              |
| Gene_Symbol=MTAP S-methyl-5-thioadenosine phosphorylase                                             |
| Gene_Symbol=MTHFD1 C-1-tetrahydrofolate synthase, cytoplasmic                                       |
| Gene_Symbol=MTPN Myotrophin                                                                         |
| Gene_Symbol=MYH9 Myosin-9                                                                           |
| Gene_Symbol=MYL6 Isoform Non-muscle of Myosin light polypeptide 6                                   |
| Gene_Symbol=NACA Similar to Nascent polypeptide associated complex alpha subunit                    |
| Gene_Symbol=NAGLU Alpha-N-acetylglucosaminidase precursor                                           |
| Gene_Symbol=NANS Sialic acid synthase                                                               |
| Gene_Symbol=NAP1L1 Nucleosome assembly protein 1-like 1                                             |
| Gene_Symbol=NAP1L4 Nucleosome assembly protein 1-like 4                                             |
| Gene_Symbol=NARG1 Isoform 2 of NMDA receptor-regulated protein 1                                    |
| Gene_Symbol=NASP Isoform 1 of Nuclear autoantigenic sperm protein                                   |
| Gene_Symbol=NCL Isoform 1 of Nucleolin                                                              |
| Gene_Symbol=NEDD8 NEDD8 precursor                                                                   |
| Gene_Symbol=NELL1 Protein kinase C-binding protein NELL1 precursor                                  |
| Gene_Symbol=NELL2 Cerebral protein-12                                                               |
| Gene_Symbol=NEO1 Isoform 2 of Neogenin precursor                                                    |
| Gene_Symbol=NME1 NME1-NME2 protein                                                                  |
| Gene_Symbol=NONO Non-POU domain-containing octamer-binding protein                                  |
| Gene_Symbol=NOTUM IMP dehydrogenase/GMP reductase family protein                                    |
| Gene_Symbol=NP CDNA FLJ25678 fis, clone TST04067, highly similar to PURINE NUCLEOSIDE PHOSPHORYLASE |
| Gene_Symbol=NPC2 Epididymal secretory protein E1 precursor                                          |
| Gene_Symbol=NPEPPS Puromycin-sensitive aminopeptidase                                               |
| Gene_Symbol=NPM1 Isoform 2 of Nucleophosmin                                                         |
| Gene_Symbol=NPTX2 Neuronal pentraxin-2 precursor                                                    |
| Gene_Symbol=NQO1 NAD                                                                                |
| Gene_Symbol=NRCAM Isoform 1 of Neuronal cell adhesion molecule precursor                            |
| Gene_Symbol=NRP2 neuropilin 2 isoform 4 precursor                                                   |
| Gene_Symbol=NSFL1C p47 protein isoform c                                                            |
| Gene_Symbol=NUCB1 Nucleobindin-1 precursor                                                          |
| Gene_Symbol=NUCB2 Nucleobindin-2 precursor                                                          |
| Gene_Symbol=NUCKS1 Isoform 1 of Nuclear ubiquitous casein and cyclin-dependent kinases substrate    |
| Gene_Symbol=NUDC Nuclear migration protein nudC                                                     |
| Gene_Symbol=NUDT21 Cleavage and polyadenylation specificity factor 5                                |
| Gene_Symbol=NUDT5 ADP-sugar pyrophosphatase                                                         |
| Gene_Symbol=NUTF2 Nuclear transport factor 2                                                        |
| Gene_Symbol=OAF Protein OAF homolog                                                                 |
| Gene_Symbol=P4HB Protein disulfide-isomerase precursor                                              |
| Gene_Symbol=PA2G4 Proliferation-associated protein 2G4                                              |
| Gene_Symbol=PABPC1 Isoform 1 of Polyadenylate-binding protein 1                                     |
| Gene_Symbol=PABPC4 Isoform 2 of Polyadenylate-binding protein 4                                     |
| Gene_Symbol=PABPN1 Isoform 1 of Polyadenylate-binding protein 2                                     |
| Gene_Symbol=PFAH1B2 Platelet-activating factor acetylhydrolase IB subunit beta                      |
| Gene_Symbol=PFAH1B3 Platelet-activating factor acetylhydrolase IB subunit gamma                     |
| Gene_Symbol=PAICS Multifunctional protein ADE2                                                      |
| Gene_Symbol=PAK1 Isoform 1 of Serine/threonine-protein kinase PAK 1                                 |
| Gene_Symbol=PAK2 Serine/threonine-protein kinase PAK 2                                              |
| Gene_Symbol=PAM Isoform 1 of Peptidyl-glycine alpha-amidating monooxygenase precursor               |
| Gene_Symbol=PAPSS1 Bifunctional 3'-phosphoadenosine 5'-phosphosulfate synthetase 1                  |
| Gene_Symbol=PARK7 Protein DJ-1                                                                      |
| Gene_Symbol=PARP1 Poly [ADP-ribose] polymerase 1                                                    |
| Gene_Symbol=PCBD1 Pterin-4-alpha-carbinolamine dehydratase                                          |
| Gene_Symbol=PCBP1 Poly(rC)-binding protein 1                                                        |
| Gene_Symbol=PCBP2 poly(rC)-binding protein 2 isoform b                                              |
| Gene_Symbol=PCDH17 Isoform 1 of Protocadherin-17 precursor                                          |
| Gene_Symbol=PCDH19 Isoform 1 of Protocadherin-19 precursor                                          |

|                                                                                            |
|--------------------------------------------------------------------------------------------|
| Gene_Symbol=PCMT1 Isoform 1 of Protein-L-isoaspartate(D-aspartate) O-methyltransferase     |
| Gene_Symbol=PCMT1 Protein-L-isoaspartate (D-aspartate) O-methyltransferase                 |
| Gene_Symbol=PCNA Proliferating cell nuclear antigen                                        |
| Gene_Symbol=PCOLCE2 Procollagen C-endopeptidase enhancer 2 precursor                       |
| Gene_Symbol=PCSK1N ProSAAS precursor                                                       |
| Gene_Symbol=PDAP1 28 kDa heat- and acid-stable phosphoprotein                              |
| Gene_Symbol=PDCD5 Programmed cell death protein 5                                          |
| Gene_Symbol=PDCD6 Programmed cell death protein 6                                          |
| Gene_Symbol=PDCD6IP PDCD6IP protein                                                        |
| Gene_Symbol=PDIA3 Protein disulfide-isomerase A3 precursor                                 |
| Gene_Symbol=PDIA4 Protein disulfide-isomerase A4 precursor                                 |
| Gene_Symbol=PDIA6 Isoform 2 of Protein disulfide-isomerase A6 precursor                    |
| Gene_Symbol=PEBP1 Phosphatidylethanolamine-binding protein 1                               |
| Gene_Symbol=PENK Proenkephalin A precursor                                                 |
| Gene_Symbol=PFAS Phosphoribosylformylglycinamide synthase                                  |
| Gene_Symbol=PFDN4 Prefoldin subunit 4                                                      |
| Gene_Symbol=PFN1 Profilin-1                                                                |
| Gene_Symbol=PFN2 Isoform IIb of Profilin-2                                                 |
| Gene_Symbol=PGD 6-phosphogluconate dehydrogenase, decarboxylating                          |
| Gene_Symbol=PGK1 Phosphoglycerate kinase 1                                                 |
| Gene_Symbol=PGLS 6-phosphogluconolactonase                                                 |
| Gene_Symbol=PGM2 Phosphoglucomutase-2                                                      |
| Gene_Symbol=PGRMC1 Membrane-associated progesterone receptor component 1                   |
| Gene_Symbol=PHGDH D-3-phosphoglycerate dehydrogenase                                       |
| Gene_Symbol=PIN1 Peptidyl-prolyl cis-trans isomerase NIMA-interacting 1                    |
| Gene_Symbol=PIR Pirin                                                                      |
| Gene_Symbol=PKM2 Isoform M1 of Pyruvate kinase isozymes M1/M2                              |
| Gene_Symbol=PKM2 Isoform M2 of Pyruvate kinase isozymes M1/M2                              |
| Gene_Symbol=PLA2G3 Group 3 secretory phospholipase A2 precursor                            |
| Gene_Symbol=PLOD1 Procollagen-lysine,2-oxoglutarate 5-dioxygenase 1 precursor              |
| Gene_Symbol=PLOD3 Procollagen-lysine,2-oxoglutarate 5-dioxygenase 3 precursor              |
| Gene_Symbol=PNPO Pyridoxine-5'-phosphate oxidase                                           |
| Gene_Symbol=PPA1 Inorganic pyrophosphatase                                                 |
| Gene_Symbol=PPIA;LOC654188;LOC653214 Peptidyl-prolyl cis-trans isomerase A                 |
| Gene_Symbol=PIIB peptidylprolyl isomerase B precursor                                      |
| Gene_Symbol=PPIL3 Isoform 1 of Peptidyl-prolyl cis-trans isomerase-like 3                  |
| Gene_Symbol=PPM1G Protein phosphatase 2C isoform gamma                                     |
| Gene_Symbol=PPP1CB Serine/threonine-protein phosphatase PP1-beta catalytic subunit         |
| Gene_Symbol=PPP1R14B Similar to Protein phosphatase 1 regulatory subunit 14B               |
| Gene_Symbol=PPP2CA Serine/threonine-protein phosphatase 2A catalytic subunit alpha isoform |
| Gene_Symbol=PPP2R1A alpha isoform of regulatory subunit A, protein phosphatase 2           |
| Gene_Symbol=PPPT1 Palmitoyl-protein thioesterase 1 precursor                               |
| Gene_Symbol=PRDX1 Peroxiredoxin-1                                                          |
| Gene_Symbol=PRDX2 Peroxiredoxin-2                                                          |
| Gene_Symbol=PRDX4 Peroxiredoxin-4                                                          |
| Gene_Symbol=PRDX5 Isoform Mitochondrial of Peroxiredoxin-5, mitochondrial precursor        |
| Gene_Symbol=PRDX5 peroxiredoxin 5 precursor, isoform b                                     |
| Gene_Symbol=PRDX6 Peroxiredoxin-6                                                          |
| Gene_Symbol=PRKCSH Glucosidase 2 subunit beta precursor                                    |
| Gene_Symbol=PRKDC Isoform 1 of DNA-dependent protein kinase catalytic subunit              |
| Gene_Symbol=PRMT5 protein arginine methyltransferase 5 isoform b                           |
| Gene_Symbol=PROSC Proline synthetase co-transcribed bacterial homolog protein              |
| Gene_Symbol=PRPS1 Phosphoribosyl pyrophosphate synthetase 1                                |
| Gene_Symbol=PRPS2 Ribose-phosphate pyrophosphokinase II                                    |
| Gene_Symbol=PRRC1 Hypothetical protein                                                     |
| Gene_Symbol=PRSS23 Serine protease 23 precursor                                            |
| Gene_Symbol=PSAP Isoform Sap-mu-0 of Proactivator polypeptide precursor                    |
| Gene_Symbol=PSAT1 Isoform 1 of Phosphoserine aminotransferase                              |
| Gene_Symbol=PSIP1 Isoform 1 of PC4 and SFRS1-interacting protein                           |

|                                                                                          |
|------------------------------------------------------------------------------------------|
| Gene_Symbol=PSMA1 Isoform Short of Proteasome subunit alpha type 1                       |
| Gene_Symbol=PSMA2 Proteasome subunit alpha type 2                                        |
| Gene_Symbol=PSMA3 Isoform 2 of Proteasome subunit alpha type 3                           |
| Gene_Symbol=PSMA4 26 kDa protein                                                         |
| Gene_Symbol=PSMA5 Proteasome subunit alpha type 5                                        |
| Gene_Symbol=PSMA6 Proteasome subunit alpha type 6                                        |
| Gene_Symbol=PSMA7 Isoform 1 of Proteasome subunit alpha type 7                           |
| Gene_Symbol=PSMB1 Proteasome subunit beta type 1 precursor                               |
| Gene_Symbol=PSMB2 Proteasome subunit beta type 2                                         |
| Gene_Symbol=PSMB3 Proteasome subunit beta type 3                                         |
| Gene_Symbol=PSMB4 Proteasome subunit beta type 4 precursor                               |
| Gene_Symbol=PSMB7 Proteasome subunit beta type 7 precursor                               |
| Gene_Symbol=PSMC4 Isoform 1 of 26S protease regulatory subunit 6B                        |
| Gene_Symbol=PSMC5 26S protease regulatory subunit 8                                      |
| Gene_Symbol=PSMC6 26S protease regulatory subunit S10B                                   |
| Gene_Symbol=PSMD1 Isoform 1 of 26S proteasome non-ATPase regulatory subunit 1            |
| Gene_Symbol=PSMD11 Proteasome 26S non-ATPase subunit 11 variant (Fragment)               |
| Gene_Symbol=PSMD13 proteasome 26S non-ATPase subunit 13 isoform 2                        |
| Gene_Symbol=PSMD2 26S proteasome non-ATPase regulatory subunit 2                         |
| Gene_Symbol=PSMD3 26S proteasome non-ATPase regulatory subunit 3                         |
| Gene_Symbol=PSMD4 Isoform Rpn10A of 26S proteasome non-ATPase regulatory subunit 4       |
| Gene_Symbol=PSMD7 26S proteasome non-ATPase regulatory subunit 7                         |
| Gene_Symbol=PSME1 29 kDa protein                                                         |
| Gene_Symbol=PSME2 Proteasome activator complex subunit 2                                 |
| Gene_Symbol=PSPC1 paraspeckle protein 1                                                  |
| Gene_Symbol=PTBP1 Isoform 1 of Polypyrimidine tract-binding protein 1                    |
| Gene_Symbol=PTGES3 Prostaglandin E synthase 3                                            |
| Gene_Symbol=PTGFRN Prostaglandin F2 receptor negative regulator precursor                |
| Gene_Symbol=PTK7 Tyrosine-protein kinase-like 7 precursor                                |
| Gene_Symbol=PTPRD protein tyrosine phosphatase, receptor type, D isoform 2 precursor     |
| Gene_Symbol=PTPRF protein tyrosine phosphatase, receptor type, F isoform 2 precursor     |
| Gene_Symbol=PTPRF Receptor-type tyrosine-protein phosphatase F precursor                 |
| Gene_Symbol=PTPRG Receptor-type tyrosine-protein phosphatase gamma precursor             |
| Gene_Symbol=PTPRK Receptor-type tyrosine-protein phosphatase kappa precursor             |
| Gene_Symbol=PTPRS protein tyrosine phosphatase, receptor type, sigma isoform 2 precursor |
| Gene_Symbol=PTPRZ1 protein tyrosine phosphatase, receptor-type, zeta1 precursor          |
| Gene_Symbol=PTX3 Pentraxin-related protein PTX3 precursor                                |
| Gene_Symbol=PVR Isoform Beta of Poliovirus receptor precursor                            |
| Gene_Symbol=PVRL1 Isoform Delta of Poliovirus receptor-related protein 1 precursor       |
| Gene_Symbol=PXDN peroxidasin homolog                                                     |
| Gene_Symbol=PYGL Glycogen phosphorylase, liver form                                      |
| Gene_Symbol=QPCT Glutaminy-peptide cyclotransferase precursor                            |
| Gene_Symbol=QSCN6 Isoform 2 of Sulfhydryl oxidase 1 precursor                            |
| Gene_Symbol=QSCN6L1 78 kDa protein                                                       |
| Gene_Symbol=RAB11B Ras-related protein Rab-11B                                           |
| Gene_Symbol=RAB14 Ras-related protein Rab-14                                             |
| Gene_Symbol=RAB7A Ras-related protein Rab-7                                              |
| Gene_Symbol=RAD23A UV excision repair protein RAD23 homolog A                            |
| Gene_Symbol=RAD23B UV excision repair protein RAD23 homolog B                            |
| Gene_Symbol=RAE1 MRNA-associated protein Mrnp 41                                         |
| Gene_Symbol=RAN 26 kDa protein                                                           |
| Gene_Symbol=RANBP3 Isoform 1 of Ran-binding protein 3                                    |
| Gene_Symbol=RANBP5 127 kDa protein                                                       |
| Gene_Symbol=RANGAP1 Ran GTPase-activating protein 1                                      |
| Gene_Symbol=RARS Isoform Complexed of Arginyl-tRNA synthetase, cytoplasmic               |
| Gene_Symbol=RBBP4 Histone-binding protein RBBP4                                          |
| Gene_Symbol=RBBP7 Histone-binding protein RBBP7                                          |
| Gene_Symbol=RBM3 Putative RNA-binding protein 3                                          |
| Gene_Symbol=RBM8A Isoform 1 of RNA-binding protein 8A                                    |



|                                                                                        |
|----------------------------------------------------------------------------------------|
| Gene_Symbol=RBMX Heterogeneous nuclear ribonucleoprotein G                             |
| Gene_Symbol=RBP1 Retinol-binding protein I, cellular                                   |
| Gene_Symbol=RCC2 Protein RCC2                                                          |
| Gene_Symbol=RCN1 Reticulocalbin-1 precursor                                            |
| Gene_Symbol=RELL1 RELL1 protein                                                        |
| Gene_Symbol=RFNG similar to Beta-1,3-N-acetylglucosaminyltransferase radical fringe    |
| Gene_Symbol=RHOA Transforming protein RhoA precursor                                   |
| Gene_Symbol=RNASE4 Ribonuclease 4 precursor                                            |
| Gene_Symbol=RNASET2 Isoform 1 of Ribonuclease T2 precursor                             |
| Gene_Symbol=RNH1 Ribonuclease inhibitor                                                |
| Gene_Symbol=RNPEP 68 kDa protein                                                       |
| Gene_Symbol=ROBO1 ROBO1 protein                                                        |
| Gene_Symbol=RPL10A 60S ribosomal protein L10a                                          |
| Gene_Symbol=RPL22 60S ribosomal protein L22                                            |
| Gene_Symbol=RPL4 60S ribosomal protein L4                                              |
| Gene_Symbol=RPLP0 60S acidic ribosomal protein P0                                      |
| Gene_Symbol=RPLP1;hCG_1641617 60S acidic ribosomal protein P1                          |
| Gene_Symbol=RPLP2 60S acidic ribosomal protein P2                                      |
| Gene_Symbol=RPS10 40S ribosomal protein S10                                            |
| Gene_Symbol=RPS11 40S ribosomal protein S11                                            |
| Gene_Symbol=RPS13 40S ribosomal protein S13                                            |
| Gene_Symbol=RPS14 40S ribosomal protein S14                                            |
| Gene_Symbol=RPS19 40S ribosomal protein S19                                            |
| Gene_Symbol=RPS21 40S ribosomal protein S21                                            |
| Gene_Symbol=RPS27A;UBC;UBB 12 kDa protein                                              |
| Gene_Symbol=RPS3 40S ribosomal protein S3                                              |
| Gene_Symbol=RPS4X 40S ribosomal protein S4, X isoform                                  |
| Gene_Symbol=RPS5 40S ribosomal protein S5                                              |
| Gene_Symbol=RPS7 40S ribosomal protein S7                                              |
| Gene_Symbol=RPS8 40S ribosomal protein S8                                              |
| Gene_Symbol=RPSA;LOC388524 Ribosomal protein SA                                        |
| Gene_Symbol=RRM1 Ribonucleoside-diphosphate reductase large subunit                    |
| Gene_Symbol=SAFB Scaffold attachment factor B                                          |
| Gene_Symbol=SAFB2 Scaffold attachment factor B2                                        |
| Gene_Symbol=SART3 Isoform 1 of Squamous cell carcinoma antigen recognized by T-cells 3 |
| Gene_Symbol=SCARB1 Isoform 1 of Scavenger receptor class B member 1                    |
| Gene_Symbol=SCYE1 37 kDa protein                                                       |
| Gene_Symbol=SDC1 Syndecan-1 precursor                                                  |
| Gene_Symbol=SDCBP Syntenin-1                                                           |
| Gene_Symbol=SDF4 45 kDa calcium-binding protein precursor                              |
| Gene_Symbol=SDPR Serum deprivation-response protein                                    |
| Gene_Symbol=SEMA3G Semaphorin-3G precursor                                             |
| Gene_Symbol=SEMA4D Semaphorin-4D precursor                                             |
| Gene_Symbol=SEMA7A Semaphorin-7A precursor                                             |
| Gene_Symbol=SEP15 15 kDa selenoprotein isoform 1 precursor                             |
| Gene_Symbol=SEPHS1 Selenide, water dikinase 1                                          |
| Gene_Symbol=SEPT9 Isoform 3 of Septin-9                                                |
| Gene_Symbol=SERPBP1 Isoform 4 of Plasminogen activator inhibitor 1 RNA-binding protein |
| Gene_Symbol=SERPINF1 Pigment epithelium-derived factor precursor                       |
| Gene_Symbol=SERPINI1 Neuroserpin precursor                                             |
| Gene_Symbol=SET Isoform 1 of Protein SET                                               |
| Gene_Symbol=SF1 Isoform 5 of Splicing factor 1                                         |
| Gene_Symbol=SF3A1 Splicing factor 3 subunit 1                                          |
| Gene_Symbol=SF3A3 Splicing factor 3A subunit 3                                         |
| Gene_Symbol=SF3B1 Splicing factor 3B subunit 1                                         |
| Gene_Symbol=SF3B2 splicing factor 3B subunit 2                                         |
| Gene_Symbol=SF3B4 Splicing factor 3B subunit 4                                         |
| Gene_Symbol=SFN Isoform 1 of 14-3-3 protein sigma                                      |
| Gene_Symbol=SFPQ Isoform Long of Splicing factor, proline- and glutamine-rich          |

|                                                                                                                         |
|-------------------------------------------------------------------------------------------------------------------------|
| Gene_Symbol=SFRP1 Secreted frizzled-related protein 1 precursor                                                         |
| Gene_Symbol=SFRS1 Isoform ASF-2 of Splicing factor, arginine/serine-rich 1                                              |
| Gene_Symbol=SFRS10 Isoform 1 of Arginine/serine-rich-splicing factor 10                                                 |
| Gene_Symbol=SFRS3 Splicing factor, arginine/serine-rich 3                                                               |
| Gene_Symbol=SFRS7 Isoform 1 of Splicing factor, arginine/serine-rich 7                                                  |
| Gene_Symbol=SFRS9 Splicing factor, arginine/serine-rich 9                                                               |
| Gene_Symbol=SGCE Isoform SGCE-1 of Epsilon-sarcoglycan precursor                                                        |
| Gene_Symbol=SGTA Small glutamine-rich tetratricopeptide repeat-containing protein A                                     |
| Gene_Symbol=SIABBP1 fuse-binding protein-interacting repressor isoform a                                                |
| Gene_Symbol=SKIV2L2 Superkiller viralicidic activity 2-like 2                                                           |
| Gene_Symbol=SKP1A Isoform 1 of S-phase kinase-associated protein 1A                                                     |
| Gene_Symbol=SLC1A5 Neutral amino acid transporter B                                                                     |
| Gene_Symbol=SLC39A10 Solute carrier family 39 (Zinc transporter), member 10                                             |
| Gene_Symbol=SLC3A2 solute carrier family 3 (activators of dibasic and neutral amino acid transport), member 2 isoform d |
| Gene_Symbol=SLIT3 Isoform 1 of Slit homolog 3 protein precursor                                                         |
| Gene_Symbol=SLITRK6 Isoform 1 of SLIT and NTRK-like protein 6 precursor                                                 |
| Gene_Symbol=SMOC1 Isoform 1 of SPARC-related modular calcium-binding protein 1 precursor                                |
| Gene_Symbol=SMOC2 Isoform 1 of SPARC-related modular calcium-binding protein 2 precursor                                |
| Gene_Symbol=SMS Spermine synthase                                                                                       |
| Gene_Symbol=SND1 Staphylococcal nuclease domain-containing protein 1                                                    |
| Gene_Symbol=SNRPA U1 small nuclear ribonucleoprotein A                                                                  |
| Gene_Symbol=SNRPB Isoform SM-B' of Small nuclear ribonucleoprotein-associated proteins B and B'                         |
| Gene_Symbol=SNRPC U1 small nuclear ribonucleoprotein C                                                                  |
| Gene_Symbol=SNRPD1 Small nuclear ribonucleoprotein Sm D1                                                                |
| Gene_Symbol=SNRPD2 Small nuclear ribonucleoprotein Sm D2                                                                |
| Gene_Symbol=SNRPD3 Small nuclear ribonucleoprotein Sm D3                                                                |
| Gene_Symbol=SOD1 16 kDa protein                                                                                         |
| Gene_Symbol=SORD Sorbitol dehydrogenase                                                                                 |
| Gene_Symbol=SORL1 Sortilin-related receptor precursor                                                                   |
| Gene_Symbol=SPINT1 Isoform 2 of Kunitz-type protease inhibitor 1 precursor                                              |
| Gene_Symbol=SPOCK1 Testican-1 precursor                                                                                 |
| Gene_Symbol=SPP1 Isoform A of Osteopontin precursor                                                                     |
| Gene_Symbol=SPP1 secreted phosphoprotein 1 isoform b                                                                    |
| Gene_Symbol=SPTAN1 Isoform 2 of Spectrin alpha chain, brain                                                             |
| Gene_Symbol=SPTAN1 Isoform 3 of Spectrin alpha chain, brain                                                             |
| Gene_Symbol=SPTBN1 Isoform Long of Spectrin beta chain, brain 1                                                         |
| Gene_Symbol=SRP14 8 kDa protein                                                                                         |
| Gene_Symbol=SRP14 Signal recognition particle 14 kDa protein                                                            |
| Gene_Symbol=SRP9;hCG_1781062 Signal recognition particle 9 kDa protein                                                  |
| Gene_Symbol=SSB Lupus La protein                                                                                        |
| Gene_Symbol=ST13 Hsc70-interacting protein                                                                              |
| Gene_Symbol=ST14 Suppressor of tumorigenicity protein 14                                                                |
| Gene_Symbol=ST6GAL1 CMP-N-acetylneuraminic acid-6-sialyltransferase                                                     |
| Gene_Symbol=STAU1 Isoform Long of Double-stranded RNA-binding protein Staufen homolog 1                                 |
| Gene_Symbol=STC2 Stanniocalcin-2 precursor                                                                              |
| Gene_Symbol=STIP1 Stress-induced-phosphoprotein 1                                                                       |
| Gene_Symbol=STMN1 Stathmin                                                                                              |
| Gene_Symbol=STRAP Serine-threonine kinase receptor-associated protein                                                   |
| Gene_Symbol=SUB1 Activated RNA polymerase II transcriptional coactivator p15                                            |
| Gene_Symbol=SYNCRIP Isoform 1 of Heterogeneous nuclear ribonucleoprotein Q                                              |
| Gene_Symbol=TACSTD1 Tumor-associated calcium signal transducer 1 precursor                                              |
| Gene_Symbol=TAF15 Isoform Short of TATA-binding protein-associated factor 2N                                            |
| Gene_Symbol=TAGLN2;CCDC19 24 kDa protein                                                                                |
| Gene_Symbol=TALDO1 TALDO1 protein                                                                                       |
| Gene_Symbol=TARDBP TAR DNA-binding protein 43                                                                           |
| Gene_Symbol=TARS Threonyl-tRNA synthetase, cytoplasmic                                                                  |
| Gene_Symbol=TBCA Tubulin-specific chaperone A                                                                           |
| Gene_Symbol=TCEB1 Transcription elongation factor B polypeptide 1                                                       |
| Gene_Symbol=TCEB2 Transcription elongation factor B polypeptide 2                                                       |

|                                                                                                   |
|---------------------------------------------------------------------------------------------------|
| Gene_Symbol=TCERG1 Transcription elongation regulator 1                                           |
| Gene_Symbol=TCP1 T-complex protein 1 subunit alpha                                                |
| Gene_Symbol=TFG Protein TFG                                                                       |
| Gene_Symbol=TFRC Transferrin receptor protein 1                                                   |
| Gene_Symbol=TGFB2 Isoform A of Transforming growth factor beta-2 precursor                        |
| Gene_Symbol=THBS1 Thrombospondin-1 precursor                                                      |
| Gene_Symbol=THOC4 THO complex subunit 4                                                           |
| Gene_Symbol=THOP1 Thimet oligopeptidase                                                           |
| Gene_Symbol=TIMP2 Metalloproteinase inhibitor 2 precursor                                         |
| Gene_Symbol=TINAGL1 Isoform 1 of Tubulointerstitial nephritis antigen-like precursor              |
| Gene_Symbol=TKT Transketolase                                                                     |
| Gene_Symbol=TLN1 271 kDa protein                                                                  |
| Gene_Symbol=TMEM132A transmembrane protein 132A isoform b                                         |
| Gene_Symbol=TMEM4 Isoform 1 of MIR-interacting saposin-like protein precursor                     |
| Gene_Symbol=TMOD3 Tropomodulin-3                                                                  |
| Gene_Symbol=TMPO Lamina-associated polypeptide 2 isoform alpha                                    |
| Gene_Symbol=TNPO1 Transportin 1 (Importin beta-2)                                                 |
| Gene_Symbol=TNPO2 Transportin 2                                                                   |
| Gene_Symbol=TPD52 Tumor protein D52                                                               |
| Gene_Symbol=TPD52L1 Tumor protein D53                                                             |
| Gene_Symbol=TPD52L2 24 kDa protein                                                                |
| Gene_Symbol=TPI1 Triosephosphate isomerase 1 variant                                              |
| Gene_Symbol=TPM3 29 kDa protein                                                                   |
| Gene_Symbol=TPM4 Isoform 1 of Tropomyosin alpha-4 chain                                           |
| Gene_Symbol=TPT1 Tumor protein, translationally-controlled 1                                      |
| Gene_Symbol=TSKU Tsukushi precursor                                                               |
| Gene_Symbol=TSN Translin                                                                          |
| Gene_Symbol=TSPAN5 Tetraspanin-5                                                                  |
| Gene_Symbol=TTLL12 Tubulin--tyrosine ligase-like protein 12                                       |
| Gene_Symbol=TUBA1A Tubulin alpha-3 chain                                                          |
| Gene_Symbol=TUBA1B Tubulin alpha-ubiquitous chain                                                 |
| Gene_Symbol=TUBB Tubulin beta chain                                                               |
| Gene_Symbol=TUBB2B Tubulin beta-2B chain                                                          |
| Gene_Symbol=TUBB2C Tubulin beta-2C chain                                                          |
| Gene_Symbol=TUBB3 Tubulin beta-3 chain                                                            |
| Gene_Symbol=TUBB6 TUBB6 protein                                                                   |
| Gene_Symbol=TXN Thioredoxin                                                                       |
| Gene_Symbol=TXNL2 Thioredoxin-like protein 2                                                      |
| Gene_Symbol=TXNL5 Thioredoxin-like protein 5                                                      |
| Gene_Symbol=TXNRD1 CDNA FLJ46672 fis, clone TRACH3009008, highly similar to Thioredoxin reductase |
| Gene_Symbol=U2AF2 Splicing factor U2AF 65 kDa subunit                                             |
| Gene_Symbol=UBE1 Ubiquitin-activating enzyme E1                                                   |
| Gene_Symbol=UBE2I SUMO-conjugating enzyme UBC9                                                    |
| Gene_Symbol=UBE2L3 Ubiquitin-conjugating enzyme E2 L3                                             |
| Gene_Symbol=UBE2N Ubiquitin-conjugating enzyme E2 N                                               |
| Gene_Symbol=UBE2V1;Kua-UEV Isoform 1 of Ubiquitin-conjugating enzyme E2 variant 1                 |
| Gene_Symbol=UBE2V2 16 kDa protein                                                                 |
| Gene_Symbol=UBQLN1 Isoform 2 of Ubiquilin-1                                                       |
| Gene_Symbol=UBQLN4 Ubiquilin-4                                                                    |
| Gene_Symbol=UCHL1 Ubiquitin carboxyl-terminal hydrolase isozyme L1                                |
| Gene_Symbol=UCHL5 Isoform 2 of Ubiquitin carboxyl-terminal hydrolase isozyme L5                   |
| Gene_Symbol=UROD Uroporphyrinogen decarboxylase                                                   |
| Gene_Symbol=USP5 Isoform Short of Ubiquitin carboxyl-terminal hydrolase 5                         |
| Gene_Symbol=USP7 Ubiquitin-specific protease 7 isoform                                            |
| Gene_Symbol=VAPA 14 kDa protein                                                                   |
| Gene_Symbol=VBP1 Von Hippel-Lindau binding protein 1                                              |
| Gene_Symbol=VCAN Isoform V0 of Versican core protein precursor                                    |
| Gene_Symbol=VCL Isoform 1 of Vinculin                                                             |
| Gene_Symbol=VCP Transitional endoplasmic reticulum ATPase                                         |

|                                                                                   |
|-----------------------------------------------------------------------------------|
| Gene_Symbol=VIL2 Ezrin                                                            |
| Gene_Symbol=VPS29 Isoform 1 of Vacuolar protein sorting-associated protein 29     |
| Gene_Symbol=VPS35 Vacuolar protein sorting-associated protein 35                  |
| Gene_Symbol=VSNL1 Visinin-like protein 1                                          |
| Gene_Symbol=VWA2 von Willebrand factor A domain-containing protein 2              |
| Gene_Symbol=WARS tryptophanyl-tRNA synthetase isoform b                           |
| Gene_Symbol=WDR1 Isoform 1 of WD repeat protein 1                                 |
| Gene_Symbol=WDR61 WD repeat protein 61                                            |
| Gene_Symbol=WFDC2 Isoform 1 of WAP four-disulfide core domain protein 2 precursor |
| Gene_Symbol=WIF1 Wnt inhibitory factor 1 precursor                                |
| Gene_Symbol=WNT5A Protein Wnt-5a precursor                                        |
| Gene_Symbol=XPO1 Exportin-1                                                       |
| Gene_Symbol=XRCC5 ATP-dependent DNA helicase 2 subunit 2                          |
| Gene_Symbol=XRCC6 70 kDa protein                                                  |
| Gene_Symbol=XTP3TPA CDNA: FLJ21190 fis, clone CAS12333                            |
| Gene_Symbol=XYLT2 Isoform 1 of Xylosyltransferase 2                               |
| Gene_Symbol=YARS Tyrosyl-tRNA synthetase, cytoplasmic                             |
| Gene_Symbol=YBX1 35 kDa protein                                                   |
| Gene_Symbol=YES1 Proto-oncogene tyrosine-protein kinase Yes                       |
| Gene_Symbol=YWHAB Isoform Long of 14-3-3 protein beta/alpha                       |
| Gene_Symbol=YWHAE 14-3-3 protein epsilon                                          |
| Gene_Symbol=YWHAG 14-3-3 protein gamma                                            |
| Gene_Symbol=YWHAQ 14-3-3 protein theta                                            |
| Gene_Symbol=YWHAZ 14-3-3 protein zeta/delta                                       |
| Gene_Symbol=ZNF207 Isoform 1 of Zinc finger protein 207                           |

**n the CM of the 3 replicates (Rep1-3) of H520 from Mascot and X!**

| Number of si | Accession numbers                                            | Protein molecular weight (AMU) |
|--------------|--------------------------------------------------------------|--------------------------------|
| 1            | IPI00797738                                                  | 12017.4                        |
| 1            | IPI00647593                                                  | 23284.1                        |
| 1            | IPI00375127                                                  | 25228.7                        |
| 1            | IPI00479366                                                  | 31421.3                        |
| 1            | IPI00738677                                                  | 34778.2                        |
| 1            | IPI00783641                                                  | 71135.5                        |
| 1            | IPI00472879                                                  | 53375.7                        |
| 1            | IPI00382617                                                  | 31463.9                        |
| 8            | IPI00164951,IPI00298454,IPI00477094,IPI00477666,IPI00479567, | 40025.1                        |
| 1            | IPI00789847                                                  | 90085.6                        |
| 2            | IPI00027442,IPI00784131                                      | 106795.2                       |
| 1            | IPI00303207                                                  | 67298.4                        |
| 1            | IPI00291419                                                  | 41332.3                        |
| 1            | IPI00021290                                                  | 120824.8                       |
| 1            | IPI00395469                                                  | 27022.1                        |
| 1            | IPI00219861                                                  | 18024.7                        |
| 1            | IPI00021428                                                  | 42034.1                        |
| 1            | IPI00021439                                                  | 41719.8                        |
| 1            | IPI00013508                                                  | 103043.1                       |
| 1            | IPI00013808                                                  | 104839.2                       |
| 1            | IPI00470573                                                  | 45359.5                        |
| 1            | IPI00028091                                                  | 47353.8                        |
| 1            | IPI00013897                                                  | 84125                          |
| 1            | IPI00288894                                                  | 93003.9                        |
| 2            | IPI00011901,IPI00249735                                      | 105020.9                       |
| 2            | IPI00440932,IPI00747759                                      | 90538.1                        |
| 1            | IPI00036578                                                  | 177655.6                       |
| 1            | IPI00152639                                                  | 134043.9                       |
| 1            | IPI00157513                                                  | 75531.6                        |
| 1            | IPI00746777                                                  | 41582.9                        |
| 1            | IPI00651738                                                  | 21481.2                        |
| 1            | IPI00234368                                                  | 38686.3                        |
| 1            | IPI00026833                                                  | 50079.8                        |
| 1            | IPI00374563                                                  | 214820                         |
| 1            | IPI00012007                                                  | 47699.1                        |
| 1            | IPI00030706                                                  | 38256.4                        |
| 2            | IPI00215901,IPI00218988                                      | 26461                          |
| 1            | IPI00220271                                                  | 36555.6                        |
| 1            | IPI00413641                                                  | 35835.9                        |
| 1            | IPI00029733                                                  | 36771.1                        |
| 2            | IPI00022434,IPI00745872                                      | 71686.9                        |
| 4            | IPI00015102,IPI00783803,IPI00795504,IPI00807403              | 65085.8                        |
| 1            | IPI00218914                                                  | 54844.8                        |
| 3            | IPI00296183,IPI00654709,IPI00796116                          | 50361.7                        |
| 1            | IPI00465439                                                  | 39402.6                        |
| 1            | IPI00418262                                                  | 39438.2                        |
| 2            | IPI00025849,IPI00449263                                      | 28568.1                        |
| 2            | IPI00007423,IPI00759824                                      | 28770.6                        |
| 2            | IPI00418169,IPI00455315                                      | 40395.3                        |
| 1            | IPI00329801                                                  | 35920.6                        |
| 1            | IPI00337741                                                  | 81206.1                        |
| 1            | IPI00215911                                                  | 35537.7                        |
| 1            | IPI00031030                                                  | 86937                          |
| 1            | IPI00168479                                                  | 31657.4                        |
| 2            | IPI00006608,IPI00412681                                      | 86923.3                        |

|   |                                                              |          |
|---|--------------------------------------------------------------|----------|
| 1 | IPI00218693                                                  | 19590.5  |
| 2 | IPI00215914,IPI00215917                                      | 20679.6  |
| 1 | IPI00797560                                                  | 20309.2  |
| 2 | IPI00165949,IPI00477831                                      | 107826.4 |
| 1 | IPI00289499                                                  | 64598.5  |
| 1 | IPI00006482                                                  | 112881.5 |
| 4 | IPI00003021,IPI00302840,IPI00640401,IPI00788782              | 112250.7 |
| 1 | IPI00008167                                                  | 31495.7  |
| 3 | IPI00020430,IPI00784119,IPI00794988                          | 52592.9  |
| 1 | IPI00168884                                                  | 38991.1  |
| 1 | IPI00007812                                                  | 56484.1  |
| 1 | IPI00641829                                                  | 50662.1  |
| 1 | IPI00166729                                                  | 34240.6  |
| 2 | IPI00004656,IPI00796379                                      | 13696.9  |
| 2 | IPI00304331,IPI00477470                                      | 37103.8  |
| 1 | IPI00009997                                                  | 47101.4  |
| 1 | IPI00215767                                                  | 43903    |
| 1 | IPI00030128                                                  | 40023.9  |
| 1 | IPI00068254                                                  | 33224.4  |
| 2 | IPI00413587,IPI00420084                                      | 21977.3  |
| 1 | IPI00219575                                                  | 52544.5  |
| 1 | IPI00301434                                                  | 16914.1  |
| 1 | IPI00795150                                                  | 46382.3  |
| 1 | IPI00419473                                                  | 17681.4  |
| 3 | IPI00013468,IPI00514701,IPI00644108                          | 37136.7  |
| 1 | IPI00003419                                                  | 20314.7  |
| 2 | IPI00006980,IPI00792100                                      | 28051.3  |
| 1 | IPI00056357                                                  | 18776.9  |
| 1 | IPI00014230                                                  | 31344.6  |
| 1 | IPI00296165                                                  | 80156.7  |
| 1 | IPI00009659                                                  | 36882.8  |
| 1 | IPI00550689                                                  | 55192.2  |
| 1 | IPI00022381                                                  | 34205    |
| 1 | IPI00295105                                                  | 35348.8  |
| 3 | IPI00395627,IPI00552308,IPI00745851                          | 26192.3  |
| 1 | IPI00301263                                                  | 242964.5 |
| 2 | IPI00003813,IPI00166392                                      | 48491.3  |
| 3 | IPI00075248,IPI00386621,IPI00794543                          | 16820    |
| 1 | IPI00020599                                                  | 48124.9  |
| 2 | IPI00014537,IPI00789155                                      | 37089.6  |
| 1 | IPI00103175                                                  | 44822.1  |
| 1 | IPI00020984                                                  | 67552.2  |
| 1 | IPI00008274                                                  | 51837.5  |
| 1 | IPI00005969                                                  | 32905.1  |
| 2 | IPI00218782,IPI00642256                                      | 33764.2  |
| 1 | IPI00304409                                                  | 15873.6  |
| 4 | IPI00027443,IPI00158625,IPI00556365,IPI00556541              | 94622.2  |
| 7 | IPI00220857,IPI00305750,IPI00760715,IPI00761035,IPI00761069, | 75288.8  |
| 2 | IPI00016746,IPI00024871                                      | 21490.1  |
| 1 | IPI00295386                                                  | 30356.8  |
| 1 | IPI00010320                                                  | 21400.1  |
| 1 | IPI00297579                                                  | 20794    |
| 1 | IPI00297779                                                  | 57471.9  |
| 3 | IPI00290770,IPI00553185,IPI00744315                          | 60446.3  |
| 1 | IPI00302927                                                  | 57908    |
| 1 | IPI00010720                                                  | 59654.3  |
| 1 | IPI00027626                                                  | 58007.3  |
| 1 | IPI00018465                                                  | 59349.8  |
| 2 | IPI00302925,IPI00784090                                      | 59761.2  |

|    |                                                              |          |
|----|--------------------------------------------------------------|----------|
| 4  | IPI00410488,IPI00441094,IPI00719044,IPI00793688              | 57216.1  |
| 14 | IPI00297160,IPI00305064,IPI00418465,IPI00419219,IPI00827650, | 39398.2  |
| 5  | IPI00219853,IPI00374176,IPI00374177,IPI00398353,IPI00456644  | 41745.7  |
| 1  | IPI00000190                                                  | 25791.8  |
| 3  | IPI00215997,IPI00657796,IPI00795937                          | 25399    |
| 2  | IPI00025861,IPI00744889                                      | 97439.6  |
| 1  | IPI00290085                                                  | 99793.8  |
| 2  | IPI00645614,IPI00747243                                      | 86534.7  |
| 2  | IPI00014197,IPI00787933                                      | 27316.7  |
| 1  | IPI00607801                                                  | 62575.5  |
| 1  | IPI00007306                                                  | 33575.4  |
| 1  | IPI00012011                                                  | 18485.2  |
| 1  | IPI00006601                                                  | 78228.1  |
| 2  | IPI00301185,IPI00306719                                      | 47597.8  |
| 1  | IPI00299059                                                  | 136638.3 |
| 1  | IPI00015897                                                  | 37471.7  |
| 2  | IPI00478414,IPI00654588                                      | 52264.6  |
| 2  | IPI00025333,IPI00387130                                      | 32195.3  |
| 3  | IPI00180954,IPI00641579,IPI00646241                          | 31900.4  |
| 1  | IPI00022977                                                  | 42627.1  |
| 1  | IPI00010896                                                  | 26905.3  |
| 1  | IPI00001960                                                  | 28755.6  |
| 2  | IPI00291930,IPI00397519                                      | 68242.5  |
| 1  | IPI00007257                                                  | 108623.5 |
| 2  | IPI00396423,IPI00747063                                      | 107015.6 |
| 2  | IPI00024067,IPI00455383                                      | 191600.9 |
| 1  | IPI00219953                                                  | 25837.9  |
| 2  | IPI00430813,IPI00430814                                      | 18723.3  |
| 3  | IPI00165579,IPI00177728,IPI00646632                          | 43816.2  |
| 1  | IPI00015262                                                  | 33679.6  |
| 1  | IPI00216682                                                  | 36396.6  |
| 1  | IPI00029751                                                  | 113304.8 |
| 1  | IPI00012386                                                  | 59465.3  |
| 1  | IPI00828195                                                  | 153749.1 |
| 1  | IPI00291136                                                  | 108513   |
| 1  | IPI00295851                                                  | 107128   |
| 1  | IPI00008453                                                  | 53232.3  |
| 1  | IPI00031121                                                  | 63657.9  |
| 1  | IPI00640372                                                  | 58616.2  |
| 1  | IPI00550308                                                  | 97378.8  |
| 1  | IPI00024403                                                  | 60113.6  |
| 2  | IPI00012998,IPI00030654                                      | 59193    |
| 1  | IPI00027397                                                  | 20045.6  |
| 1  | IPI00305469                                                  | 22887.9  |
| 1  | IPI00004839                                                  | 33759.3  |
| 1  | IPI00022744                                                  | 110403.9 |
| 1  | IPI00442073                                                  | 20549.1  |
| 1  | IPI00305477                                                  | 16343.8  |
| 1  | IPI00032293                                                  | 15781.2  |
| 1  | IPI00021828                                                  | 11121.3  |
| 3  | IPI00013256,IPI00607841,IPI00744127                          | 60941.1  |
| 1  | IPI00215948                                                  | 100054.9 |
| 1  | IPI00787237                                                  | 77188.8  |
| 11 | IPI00182469,IPI00219725,IPI00219728,IPI00219730,IPI00219732, | 107333   |
| 1  | IPI00290142                                                  | 66672.7  |
| 1  | IPI00645702                                                  | 65661.4  |
| 1  | IPI00022810                                                  | 51824.3  |
| 1  | IPI00011229                                                  | 44535    |
| 1  | IPI00002745                                                  | 33850.2  |

|   |                                                              |          |
|---|--------------------------------------------------------------|----------|
| 2 | IPI00029601,IPI00062884                                      | 61743.7  |
| 1 | IPI00014312                                                  | 88914.1  |
| 3 | IPI00034319,IPI00554556,IPI00554634                          | 20906.9  |
| 1 | IPI00396257                                                  | 13060.2  |
| 1 | IPI00465315                                                  | 11731.4  |
| 2 | IPI00644231,IPI00791837                                      | 144772.3 |
| 1 | IPI00044326                                                  | 42980    |
| 1 | IPI00028911                                                  | 97563.3  |
| 3 | IPI00010182,IPI00218836,IPI00815745                          | 10026.8  |
| 2 | IPI00003406,IPI00295624                                      | 71406.5  |
| 2 | IPI00220503,IPI00793544                                      | 44802.3  |
| 1 | IPI00786914                                                  | 126972.2 |
| 1 | IPI00293867                                                  | 12694.2  |
| 2 | IPI00008943,IPI00019918                                      | 53957.9  |
| 1 | IPI00644431                                                  | 49111.7  |
| 1 | IPI00215637                                                  | 73227.7  |
| 1 | IPI00010882                                                  | 36504.5  |
| 1 | IPI00396435                                                  | 92813.4  |
| 1 | IPI00742905                                                  | 146459   |
| 1 | IPI00003269                                                  | 41986.2  |
| 1 | IPI00398918                                                  | 50809.8  |
| 1 | IPI00012535                                                  | 44850.6  |
| 1 | IPI00032406                                                  | 45727.7  |
| 1 | IPI00015947                                                  | 38027.6  |
| 1 | IPI00008454                                                  | 40496.6  |
| 1 | IPI00003438                                                  | 29824.2  |
| 1 | IPI00010348                                                  | 39563    |
| 1 | IPI00146935                                                  | 81861.2  |
| 7 | IPI00033022,IPI00181352,IPI00218889,IPI00477431,IPI00514550, | 98049.9  |
| 4 | IPI00015856,IPI00029820,IPI00658188,IPI00658215              | 53420.6  |
| 1 | IPI00029111                                                  | 73893.1  |
| 2 | IPI00025846,IPI00220146                                      | 99944.6  |
| 1 | IPI00028931                                                  | 122276.4 |
| 2 | IPI00473014,IPI00643237                                      | 18488.2  |
| 1 | IPI00793322                                                  | 24470.6  |
| 2 | IPI00456969,IPI00477531                                      | 532387.6 |
| 1 | IPI00019329                                                  | 10348.1  |
| 1 | IPI00396485                                                  | 50123.2  |
| 1 | IPI00178440                                                  | 24746.2  |
| 1 | IPI00642971                                                  | 71390.3  |
| 2 | IPI00000875,IPI00747497                                      | 50101.4  |
| 1 | IPI00186290                                                  | 95322.1  |
| 1 | IPI00003519                                                  | 109420.1 |
| 1 | IPI00005578                                                  | 61159.6  |
| 1 | IPI00015077                                                  | 12714.9  |
| 1 | IPI00219678                                                  | 36094.7  |
| 1 | IPI00297982                                                  | 51092.2  |
| 1 | IPI00290461                                                  | 29045.3  |
| 1 | IPI00012795                                                  | 36484    |
| 1 | IPI00647650                                                  | 41563.7  |
| 1 | IPI00290460                                                  | 35594    |
| 1 | IPI00465233                                                  | 70886.5  |
| 1 | IPI00025491                                                  | 46137.3  |
| 2 | IPI00012079,IPI00439415                                      | 69208.8  |
| 2 | IPI00783643,IPI00788723                                      | 24906.5  |
| 1 | IPI00022648                                                  | 49205.4  |
| 2 | IPI00376005,IPI00411704                                      | 20152.9  |
| 1 | IPI00299254                                                  | 138786.3 |
| 1 | IPI00301936                                                  | 36074.6  |



|   |                                                              |          |
|---|--------------------------------------------------------------|----------|
| 1 | IPI00465248                                                  | 47152.2  |
| 2 | IPI00156171,IPI00303210                                      | 98987.4  |
| 9 | IPI00220797,IPI00383552,IPI00410177,IPI00410178,IPI00410179, | 12958.1  |
| 1 | IPI00013452                                                  | 170575.2 |
| 1 | IPI00029631                                                  | 12241.3  |
| 1 | IPI00024911                                                  | 28976.9  |
| 1 | IPI00411706                                                  | 31445.6  |
| 2 | IPI00009841,IPI00065554                                      | 68947.8  |
| 2 | IPI00002732,IPI00790204                                      | 37563.9  |
| 3 | IPI00001754,IPI00069985,IPI00294993                          | 32565.1  |
| 1 | IPI00021923                                                  | 24662.9  |
| 2 | IPI00303318,IPI00789253                                      | 36730.7  |
| 1 | IPI00300074                                                  | 66114.6  |
| 1 | IPI00645907                                                  | 273409.1 |
| 1 | IPI00296537                                                  | 74441.9  |
| 1 | IPI00296534                                                  | 77240.8  |
| 1 | IPI00465038                                                  | 131840.5 |
| 1 | IPI00032908                                                  | 23984.7  |
| 1 | IPI00021399                                                  | 26246.4  |
| 1 | IPI00328245                                                  | 91563.3  |
| 1 | IPI00296561                                                  | 54518.7  |
| 2 | IPI00296053,IPI00759715                                      | 54619.8  |
| 1 | IPI00413778                                                  | 15670.9  |
| 1 | IPI00024157                                                  | 25159.4  |
| 1 | IPI00219005                                                  | 51787.9  |
| 2 | IPI00059292,IPI00219306                                      | 17258.6  |
| 1 | IPI00305010                                                  | 35530.7  |
| 1 | IPI00002191                                                  | 63529.8  |
| 1 | IPI00333541                                                  | 280711.4 |
| 1 | IPI00470919                                                  | 266182.2 |
| 1 | IPI00022418                                                  | 262581   |
| 1 | IPI00329327                                                  | 443604   |
| 1 | IPI00180707                                                  | 351136.8 |
| 2 | IPI00163187,IPI00747810                                      | 54512.3  |
| 1 | IPI00008087                                                  | 95734.2  |
| 1 | IPI00788671                                                  | 68587.1  |
| 1 | IPI00012440                                                  | 54044.1  |
| 1 | IPI00260715                                                  | 53359.1  |
| 1 | IPI00646643                                                  | 22118.1  |
| 1 | IPI00012442                                                  | 52144.8  |
| 1 | IPI00009057                                                  | 54102.3  |
| 3 | IPI00216008,IPI00289800,IPI00760751                          | 63810.1  |
| 1 | IPI00783446                                                  | 105320.6 |
| 1 | IPI00298949                                                  | 143174.4 |
| 1 | IPI00026637                                                  | 13285.3  |
| 1 | IPI00375205                                                  | 68975.1  |
| 1 | IPI00004669                                                  | 64715.1  |
| 1 | IPI00026991                                                  | 71141.3  |
| 1 | IPI00011454                                                  | 109422.2 |
| 1 | IPI00219018                                                  | 36035.3  |
| 1 | IPI00465260                                                  | 84632.6  |
| 1 | IPI00025273                                                  | 107750.4 |
| 2 | IPI00021807,IPI00759616                                      | 59699.7  |
| 1 | IPI00306543                                                  | 34150.9  |
| 1 | IPI00031461                                                  | 50647.5  |
| 1 | IPI00023728                                                  | 35947.8  |
| 1 | IPI00024705                                                  | 36032.6  |
| 1 | IPI00554793                                                  | 11949.2  |
| 2 | IPI00414717,IPI00641153                                      | 137205.8 |

|    |                                                              |          |
|----|--------------------------------------------------------------|----------|
| 1  | IPI00220766                                                  | 20760.8  |
| 1  | IPI00018236                                                  | 20804.9  |
| 1  | IPI00029079                                                  | 76698.7  |
| 1  | IPI00026268                                                  | 37359.5  |
| 1  | IPI00641950                                                  | 37871.3  |
| 1  | IPI00009305                                                  | 32651.4  |
| 2  | IPI00759659,IPI00784293                                      | 44254.2  |
| 1  | IPI00004962                                                  | 81859.5  |
| 2  | IPI00031241,IPI00743931                                      | 39750.8  |
| 1  | IPI00219029                                                  | 46230.1  |
| 1  | IPI00018206                                                  | 47458.6  |
| 1  | IPI00015688                                                  | 61633.3  |
| 1  | IPI00232571                                                  | 62394.5  |
| 1  | IPI00027497                                                  | 63130.5  |
| 2  | IPI00030910,IPI00639921                                      | 72731.8  |
| 3  | IPI00397949,IPI00412420,IPI00783104                          | 77055.6  |
| 1  | IPI00026199                                                  | 25488.2  |
| 1  | IPI00021327                                                  | 25188.8  |
| 2  | IPI00037448,IPI00550682                                      | 35651.1  |
| 1  | IPI00026314                                                  | 85679.8  |
| 1  | IPI00218829                                                  | 68682.1  |
| 1  | IPI00016862                                                  | 56239.4  |
| 1  | IPI00010706                                                  | 52367.9  |
| 1  | IPI00219757                                                  | 23338.7  |
| 1  | IPI00290416                                                  | 44727.4  |
| 1  | IPI00021808                                                  | 57394.5  |
| 1  | IPI00410714                                                  | 15239.6  |
| 10 | IPI00217471,IPI00220706,IPI00473011,IPI00654755,IPI00657660, | 16185    |
| 1  | IPI00740800                                                  | 25863.5  |
| 2  | IPI00176610,IPI00741006                                      | 18676.7  |
| 1  | IPI00514330                                                  | 25519.7  |
| 2  | IPI00027851,IPI00829779                                      | 60671.8  |
| 1  | IPI00239077                                                  | 13784.1  |
| 3  | IPI00019894,IPI00021370,IPI00784038                          | 16600.4  |
| 1  | IPI00453473                                                  | 11349.7  |
| 1  | IPI00339274                                                  | 13971    |
| 1  | IPI00102864                                                  | 102363.3 |
| 1  | IPI00644631                                                  | 40903.2  |
| 2  | IPI00472112,IPI00472448                                      | 41446.2  |
| 1  | IPI00472284                                                  | 40460    |
| 2  | IPI00472035,IPI00745649                                      | 36779.5  |
| 1  | IPI00789627                                                  | 44137.6  |
| 1  | IPI00795906                                                  | 44342.4  |
| 1  | IPI00107380                                                  | 43079.7  |
| 1  | IPI00004672                                                  | 41218    |
| 2  | IPI00028160,IPI00219877                                      | 39312.5  |
| 4  | IPI00419258,IPI00644653,IPI00645948,IPI00815806              | 24876.7  |
| 1  | IPI00219097                                                  | 24016.6  |
| 4  | IPI00217477,IPI00411540,IPI00640781,IPI00643317              | 22962.7  |
| 1  | IPI00384857                                                  | 19898.4  |
| 3  | IPI00215965,IPI00465365,IPI00797148                          | 38828.1  |
| 1  | IPI00396378                                                  | 37412.3  |
| 1  | IPI00334713                                                  | 30570.2  |
| 1  | IPI00216592                                                  | 32320    |
| 2  | IPI00011274,IPI00045498                                      | 46420.6  |
| 1  | IPI00003881                                                  | 45653.8  |
| 1  | IPI00479191                                                  | 51212.1  |
| 1  | IPI00026230                                                  | 49246.1  |
| 2  | IPI00013877,IPI00216493                                      | 36909.6  |

|   |                                                 |          |
|---|-------------------------------------------------|----------|
| 2 | IPI00514561,IPI00807545                         | 47541.6  |
| 2 | IPI00027834,IPI00796199                         | 64114.8  |
| 2 | IPI00171903,IPI00383296                         | 77499.3  |
| 2 | IPI00012074,IPI00644055                         | 70925.8  |
| 1 | IPI00644079                                     | 90567.2  |
| 1 | IPI00218493                                     | 24562.2  |
| 3 | IPI00304693,IPI00607616,IPI00736669             | 54163.3  |
| 1 | IPI00334775                                     | 84743.6  |
| 1 | IPI00027230                                     | 92453.7  |
| 1 | IPI00304925                                     | 70022    |
| 1 | IPI00002966                                     | 94283    |
| 1 | IPI00003362                                     | 72405.6  |
| 1 | IPI00003865                                     | 70881.8  |
| 1 | IPI00007765                                     | 73663.3  |
| 1 | IPI00472102                                     | 61195.9  |
| 1 | IPI00220362                                     | 10913.7  |
| 1 | IPI00796127                                     | 97442.5  |
| 2 | IPI00218993,IPI00514983                         | 92099    |
| 1 | IPI00003176                                     | 51269.3  |
| 3 | IPI00168847,IPI00178140,IPI00654773             | 45127.1  |
| 1 | IPI00000877                                     | 111318.8 |
| 1 | IPI00644127                                     | 144944.4 |
| 1 | IPI00220373                                     | 118009   |
| 1 | IPI00027223                                     | 46642.5  |
| 1 | IPI00433029                                     | 21823.7  |
| 1 | IPI00297284                                     | 35119.1  |
| 2 | IPI00018305,IPI00556155                         | 31656.1  |
| 1 | IPI00029236                                     | 30552    |
| 1 | IPI00291987                                     | 28986.6  |
| 1 | IPI00056478                                     | 65014.8  |
| 2 | IPI00020354,IPI00647552                         | 48742    |
| 1 | IPI00021382                                     | 45403.8  |
| 1 | IPI00005198                                     | 43044.7  |
| 2 | IPI00298788,IPI00418313                         | 95320.9  |
| 1 | IPI00006164                                     | 42889.2  |
| 1 | IPI00291510                                     | 55788.4  |
| 2 | IPI00007402,IPI00784008                         | 119686.7 |
| 1 | IPI00009342                                     | 189240.6 |
| 1 | IPI00031821                                     | 30321.1  |
| 1 | IPI00099650                                     | 133778   |
| 2 | IPI00014238,IPI00307092                         | 68032.4  |
| 4 | IPI00008575,IPI00082310,IPI00385834,IPI00479209 | 48210.2  |
| 1 | IPI00479786                                     | 73097.6  |
| 1 | IPI00012837                                     | 109668.3 |
| 1 | IPI00220142                                     | 27850.1  |
| 1 | IPI00002214                                     | 57844.5  |
| 1 | IPI00012578                                     | 57868.9  |
| 1 | IPI00001639                                     | 97153.3  |
| 3 | IPI00140177,IPI00218929,IPI00651704             | 51880.7  |
| 1 | IPI00220327                                     | 66001.2  |
| 2 | IPI00554788,IPI00784347                         | 48805.7  |
| 1 | IPI00479145                                     | 44075    |
| 1 | IPI00290857                                     | 64488    |
| 1 | IPI00554648                                     | 53688.2  |
| 1 | IPI00019359                                     | 62113    |
| 1 | IPI00641693                                     | 400304   |
| 1 | IPI00298281                                     | 177587.1 |
| 3 | IPI00009030,IPI00216172,IPI00739827             | 44942.9  |
| 1 | IPI00419237                                     | 56149.7  |

|   |                                     |          |
|---|-------------------------------------|----------|
| 1 | IPI00217966                         | 36671.2  |
| 1 | IPI00219217                         | 36620.6  |
| 1 | IPI00792252                         | 66389    |
| 1 | IPI00455739                         | 41756.2  |
| 1 | IPI00219219                         | 14697.8  |
| 1 | IPI00465431                         | 26170.8  |
| 1 | IPI00023673                         | 65314.1  |
| 1 | IPI00293303                         | 49393    |
| 1 | IPI00009950                         | 40211.5  |
| 2 | IPI00021405,IPI00216953             | 74122.7  |
| 1 | IPI00217975                         | 66391.6  |
| 1 | IPI00009771                         | 69931.4  |
| 2 | IPI00399212,IPI00414127             | 35005.8  |
| 1 | IPI00456898                         | 14579.8  |
| 1 | IPI00027378                         | 33307.4  |
| 1 | IPI00740545                         | 121267   |
| 2 | IPI00014263,IPI00220894             | 27368    |
| 1 | IPI00007797                         | 15146.4  |
| 1 | IPI00028109                         | 11231.8  |
| 1 | IPI00782994                         | 86705.1  |
| 2 | IPI00183445,IPI00410210             | 162701   |
| 1 | IPI00170935                         | 63456.7  |
| 1 | IPI00328716                         | 58623.5  |
| 3 | IPI00409640,IPI00409641,IPI00641640 | 71420.9  |
| 2 | IPI00219077,IPI00514090             | 69269.1  |
| 2 | IPI00073196,IPI00398794             | 139336.6 |
| 1 | IPI00006932                         | 47488.6  |
| 1 | IPI00303882                         | 47027.6  |
| 2 | IPI00432363,IPI00514468             | 670132.1 |
| 1 | IPI00018042                         | 34911    |
| 1 | IPI00439446                         | 75358.2  |
| 1 | IPI00003802                         | 131071.5 |
| 1 | IPI00008868                         | 270602.3 |
| 1 | IPI00219604                         | 43422.2  |
| 3 | IPI00220113,IPI00396171,IPI00745518 | 102888.8 |
| 1 | IPI00003479                         | 41373.9  |
| 1 | IPI00017596                         | 29981.5  |
| 1 | IPI00219301                         | 31536.2  |
| 1 | IPI00641181                         | 19510.6  |
| 1 | IPI00010157                         | 43642.8  |
| 2 | IPI00002324,IPI00181717             | 37533.6  |
| 3 | IPI00168520,IPI00473118,IPI00554542 | 104756.7 |
| 1 | IPI00005690                         | 52892.5  |
| 1 | IPI00789551                         | 99952.9  |
| 1 | IPI00013214                         | 90964.6  |
| 1 | IPI00018349                         | 96542.6  |
| 1 | IPI00031517                         | 92872.6  |
| 1 | IPI00291005                         | 36408.9  |
| 1 | IPI00010333                         | 15567.3  |
| 1 | IPI00008215                         | 64133.4  |
| 2 | IPI00022621,IPI00644827             | 20807.2  |
| 1 | IPI00002236                         | 43104.9  |
| 1 | IPI00020407                         | 84526.8  |
| 1 | IPI00298618                         | 19034.5  |
| 2 | IPI00640150,IPI00647961             | 42527.4  |
| 1 | IPI00293276                         | 12458.5  |
| 1 | IPI00293748                         | 55034.9  |
| 1 | IPI00004233                         | 358677.8 |
| 2 | IPI00023461,IPI00759546             | 206790.4 |

|   |                                                              |          |
|---|--------------------------------------------------------------|----------|
| 1 | IPI00027780                                                  | 73867.1  |
| 1 | IPI00154975                                                  | 29892.3  |
| 1 | IPI00219365                                                  | 67803.8  |
| 1 | IPI00011876                                                  | 31232.4  |
| 2 | IPI00218342,IPI00794900                                      | 101543.5 |
| 1 | IPI00179589                                                  | 12877.3  |
| 1 | IPI00019502                                                  | 226519.5 |
| 8 | IPI00335168,IPI00413922,IPI00744444,IPI00789605,IPI00795576, | 16911.8  |
| 2 | IPI00023748,IPI00797126                                      | 94662.5  |
| 1 | IPI00008787                                                  | 82149.5  |
| 1 | IPI00147874                                                  | 40289.9  |
| 4 | IPI00023860,IPI00789029,IPI00791065,IPI00793389              | 45357    |
| 1 | IPI00017763                                                  | 42993    |
| 2 | IPI00032158,IPI00386189                                      | 101188.9 |
| 1 | IPI00179953                                                  | 85217.5  |
| 1 | IPI00604620                                                  | 76597.9  |
| 1 | IPI00020008                                                  | 9054     |
| 1 | IPI00023754                                                  | 89586.5  |
| 1 | IPI00795624                                                  | 91147.2  |
| 1 | IPI00217291                                                  | 154286.8 |
| 2 | IPI00604590,IPI00795292                                      | 32624.2  |
| 1 | IPI00304596                                                  | 54213.6  |
| 1 | IPI00465159                                                  | 55681.2  |
| 1 | IPI00017672                                                  | 32533.5  |
| 1 | IPI00301579                                                  | 16552    |
| 1 | IPI00026216                                                  | 103261.1 |
| 2 | IPI00220740,IPI00549248                                      | 29446.9  |
| 1 | IPI00026946                                                  | 47024    |
| 3 | IPI00012069,IPI00619898,IPI00619966                          | 30851    |
| 2 | IPI00333776,IPI00655818                                      | 144057.7 |
| 2 | IPI00300890,IPI00641131                                      | 101968.9 |
| 1 | IPI00376904                                                  | 28504.6  |
| 2 | IPI00295542,IPI00790899                                      | 53861.6  |
| 2 | IPI00009123,IPI00746961                                      | 50206.3  |
| 1 | IPI00022145                                                  | 27278.7  |
| 3 | IPI00550746,IPI00646767,IPI00647418                          | 38225.7  |
| 1 | IPI00646917                                                  | 26210.1  |
| 2 | IPI00296913,IPI00646762                                      | 24309.8  |
| 1 | IPI00009901                                                  | 14460.9  |
| 1 | IPI00328703                                                  | 30670.4  |
| 1 | IPI00010796                                                  | 57100.1  |
| 2 | IPI00299000,IPI00794875                                      | 43768.7  |
| 4 | IPI00008524,IPI00410017,IPI00478522,IPI00796945              | 70653.3  |
| 1 | IPI00555747                                                  | 69561.5  |
| 2 | IPI00005792,IPI00414963                                      | 32731.5  |
| 1 | IPI00026546                                                  | 25551.5  |
| 1 | IPI00014808                                                  | 25715.6  |
| 1 | IPI00217223                                                  | 49662.3  |
| 1 | IPI00656138                                                  | 60630.3  |
| 1 | IPI00419979                                                  | 58059.2  |
| 5 | IPI00177543,IPI00219041,IPI00219042,IPI00219043,IPI00749176  | 108498.8 |
| 1 | IPI00011619                                                  | 70815.3  |
| 1 | IPI00298547                                                  | 19873.1  |
| 1 | IPI00449049                                                  | 113069.8 |
| 1 | IPI00218568                                                  | 11981.7  |
| 1 | IPI00016610                                                  | 37480.2  |
| 3 | IPI00012066,IPI00216689,IPI00796337                          | 38204.5  |
| 1 | IPI00645206                                                  | 126212.6 |
| 1 | IPI00552819                                                  | 126236   |

|   |                                     |          |
|---|-------------------------------------|----------|
| 2 | IPI00411680,IPI00828189             | 24632.9  |
| 1 | IPI00024989                         | 24661.8  |
| 1 | IPI00021700                         | 28751.3  |
| 1 | IPI00002543                         | 45699.3  |
| 1 | IPI00002280                         | 27355.2  |
| 1 | IPI00013297                         | 20612.8  |
| 1 | IPI00023640                         | 14267.3  |
| 1 | IPI00025277                         | 21851.1  |
| 1 | IPI00246058                         | 96802.5  |
| 2 | IPI00025252,IPI00657680             | 56766.6  |
| 1 | IPI00009904                         | 72916    |
| 1 | IPI00299571                         | 53883.9  |
| 1 | IPI00219446                         | 21038.9  |
| 1 | IPI00000828                         | 30770.3  |
| 1 | IPI00004534                         | 144645.6 |
| 1 | IPI00015891                         | 15296.6  |
| 1 | IPI00216691                         | 15036.3  |
| 2 | IPI00107555,IPI00219468             | 15070.3  |
| 1 | IPI00219525                         | 53123.9  |
| 1 | IPI00169383                         | 44597.3  |
| 1 | IPI00029997                         | 27529.5  |
| 1 | IPI00550364                         | 68267.7  |
| 1 | IPI00220739                         | 21654.2  |
| 1 | IPI00011200                         | 56632.6  |
| 1 | IPI00013723                         | 18225.7  |
| 1 | IPI00012575                         | 32095.7  |
| 1 | IPI00220644                         | 58044.6  |
| 1 | IPI00479186                         | 57919.5  |
| 1 | IPI00024578                         | 57132.8  |
| 1 | IPI00027192                         | 83534.5  |
| 1 | IPI00030255                         | 84768.8  |
| 1 | IPI00018272                         | 29970.2  |
| 1 | IPI00015018                         | 32642.6  |
| 1 | IPI00419585                         | 17994.9  |
| 1 | IPI00646304                         | 23725.2  |
| 1 | IPI00300952                         | 18136.7  |
| 1 | IPI00006167                         | 59253.9  |
| 1 | IPI00218236                         | 37170.3  |
| 1 | IPI00398922                         | 20947.2  |
| 2 | IPI00008380,IPI00815784             | 35576.5  |
| 2 | IPI00419307,IPI00554737             | 65291.7  |
| 1 | IPI00002412                         | 34176    |
| 1 | IPI00000874                         | 22092.9  |
| 1 | IPI00027350                         | 21874.4  |
| 1 | IPI00011937                         | 30523.1  |
| 2 | IPI00024915,IPI00759663             | 22008.3  |
| 1 | IPI00375306                         | 17376.4  |
| 1 | IPI00220301                         | 25018.1  |
| 2 | IPI00026154,IPI00792916             | 59407.7  |
| 2 | IPI00296337,IPI00376215             | 469077.5 |
| 1 | IPI00064328                         | 71303.7  |
| 1 | IPI00016346                         | 30325.8  |
| 1 | IPI00552495                         | 24066.4  |
| 2 | IPI00219617,IPI00718888             | 34751.5  |
| 2 | IPI00217053,IPI00744319             | 48888.7  |
| 1 | IPI00026941                         | 42984.4  |
| 3 | IPI00012503,IPI00219825,IPI00744835 | 58094    |
| 2 | IPI00001734,IPI00219478             | 40405.3  |
| 1 | IPI00028122                         | 60085.9  |

|   |                                                 |          |
|---|-------------------------------------------------|----------|
| 2 | IPI00016832,IPI00472442                         | 29538    |
| 1 | IPI00219622                                     | 25880.9  |
| 2 | IPI00171199,IPI00419249                         | 27629.7  |
| 1 | IPI00795606                                     | 26265    |
| 1 | IPI00291922                                     | 26393.3  |
| 1 | IPI00029623                                     | 27381.5  |
| 1 | IPI00024175                                     | 27869.1  |
| 1 | IPI00025019                                     | 26472.5  |
| 1 | IPI00028006                                     | 22819.5  |
| 1 | IPI00028004                                     | 22931.6  |
| 1 | IPI00555956                                     | 29187    |
| 1 | IPI00003217                                     | 29947.9  |
| 2 | IPI00020042,IPI00216770                         | 47349.7  |
| 2 | IPI00023919,IPI00745502                         | 45609.2  |
| 1 | IPI00021926                                     | 44156.9  |
| 2 | IPI00299608,IPI00456695                         | 105821.2 |
| 1 | IPI00105598                                     | 47519.4  |
| 1 | IPI00375380                                     | 39853.6  |
| 1 | IPI00012268                                     | 100184.2 |
| 1 | IPI00011603                                     | 60961.6  |
| 1 | IPI00022694                                     | 40719.2  |
| 1 | IPI00019927                                     | 37007.6  |
| 1 | IPI00479722                                     | 28819.8  |
| 2 | IPI00384051,IPI00746205                         | 27344.3  |
| 1 | IPI00103525                                     | 58726.5  |
| 3 | IPI00179964,IPI00183626,IPI00334175             | 57204.5  |
| 3 | IPI00015029,IPI00789101,IPI00789698             | 18679.9  |
| 1 | IPI00022048                                     | 98537.6  |
| 1 | IPI00298292                                     | 118373.6 |
| 1 | IPI00375547                                     | 213303.8 |
| 1 | IPI00465186                                     | 211667.8 |
| 2 | IPI00107831,IPI00642154                         | 211825.8 |
| 1 | IPI00011651                                     | 162041.5 |
| 1 | IPI00015756                                     | 162071.2 |
| 1 | IPI00743517                                     | 212466.3 |
| 1 | IPI00748312                                     | 254569.4 |
| 1 | IPI00029568                                     | 42001.9  |
| 1 | IPI00219425                                     | 40105.9  |
| 1 | IPI00003648                                     | 57140    |
| 2 | IPI00016112,IPI00787655                         | 165257.7 |
| 2 | IPI00470525,IPI00783313                         | 97134.4  |
| 1 | IPI00003919                                     | 40859.9  |
| 1 | IPI00465016                                     | 66843.3  |
| 3 | IPI00376394,IPI00479085,IPI00783371             | 77739.3  |
| 1 | IPI00020436                                     | 24471    |
| 1 | IPI00291928                                     | 23879.6  |
| 1 | IPI00016342                                     | 23472    |
| 1 | IPI00008219                                     | 39591.1  |
| 1 | IPI00008223                                     | 43153.1  |
| 1 | IPI00749517                                     | 40811.3  |
| 2 | IPI00792352,IPI00793015                         | 26391.6  |
| 4 | IPI00026337,IPI00179121,IPI00456728,IPI00456729 | 60191.9  |
| 3 | IPI00329200,IPI00783829,IPI00793443             | 126506.7 |
| 2 | IPI00294879,IPI00411570                         | 63525.3  |
| 2 | IPI00004860,IPI00759723                         | 75364    |
| 2 | IPI00328319,IPI00645329                         | 47637.8  |
| 1 | IPI00395865                                     | 47802    |
| 2 | IPI00024320,IPI00604407                         | 17152.6  |
| 2 | IPI00001757,IPI00216659                         | 19871.4  |

|   |                                                 |          |
|---|-------------------------------------------------|----------|
| 1 | IPI00304692                                     | 42315.7  |
| 1 | IPI00219718                                     | 22292.3  |
| 1 | IPI00465044                                     | 56066.8  |
| 1 | IPI00015842                                     | 38873.2  |
| 1 | IPI00216890                                     | 29321    |
| 1 | IPI00788176                                     | 30029    |
| 1 | IPI00027500                                     | 21750.4  |
| 1 | IPI00029699                                     | 16822.4  |
| 1 | IPI00414896                                     | 29463.2  |
| 1 | IPI00550069                                     | 49956.4  |
| 1 | IPI00647400                                     | 68152.3  |
| 1 | IPI00829739                                     | 169635.2 |
| 2 | IPI00412579,IPI00827508                         | 24814    |
| 1 | IPI00219153                                     | 14769.3  |
| 1 | IPI00003918                                     | 47681.1  |
| 3 | IPI00008530,IPI00556485,IPI00791448             | 34256.3  |
| 1 | IPI00008527                                     | 11496.1  |
| 1 | IPI00008529                                     | 11647.5  |
| 1 | IPI00008438                                     | 18880.3  |
| 1 | IPI00025091                                     | 18413.3  |
| 1 | IPI00221089                                     | 17205.3  |
| 1 | IPI00026271                                     | 16254.9  |
| 1 | IPI00215780                                     | 16042.5  |
| 3 | IPI00017448,IPI00387084,IPI00797280             | 9093.6   |
| 1 | IPI00793330                                     | 12234.6  |
| 1 | IPI00011253                                     | 26670.6  |
| 1 | IPI00217030                                     | 29581.3  |
| 1 | IPI00008433                                     | 22859    |
| 1 | IPI00013415                                     | 22109.5  |
| 1 | IPI00216587                                     | 24188.4  |
| 2 | IPI00413108,IPI00553164                         | 33295.5  |
| 1 | IPI00013871                                     | 90055.5  |
| 1 | IPI00646058                                     | 102838.1 |
| 1 | IPI00005648                                     | 107456.4 |
| 1 | IPI00006025                                     | 109918.3 |
| 3 | IPI00177968,IPI00291007,IPI00447020             | 56956.6  |
| 1 | IPI00793201                                     | 37021.5  |
| 1 | IPI00002441                                     | 32458.3  |
| 2 | IPI00299086,IPI00479018                         | 32427.3  |
| 1 | IPI00106646                                     | 41788.9  |
| 1 | IPI00005809                                     | 47154.9  |
| 1 | IPI00024570                                     | 86682.2  |
| 1 | IPI00023807                                     | 96132.9  |
| 1 | IPI00025257                                     | 74805.7  |
| 1 | IPI00030877                                     | 18027.4  |
| 1 | IPI00029056                                     | 42892.5  |
| 4 | IPI00455033,IPI00784614,IPI00784808,IPI00784936 | 47483.9  |
| 2 | IPI00412714,IPI00470498                         | 42408.9  |
| 1 | IPI00006114                                     | 46326.4  |
| 1 | IPI00016150                                     | 46409.9  |
| 1 | IPI00072377                                     | 33471.4  |
| 1 | IPI00386119                                     | 80603.5  |
| 2 | IPI00017451,IPI00470590                         | 88868.1  |
| 1 | IPI00029764                                     | 58833.3  |
| 1 | IPI00026089                                     | 145802.3 |
| 1 | IPI00221106                                     | 100211.4 |
| 1 | IPI00017339                                     | 44368.5  |
| 1 | IPI00013890                                     | 27756.8  |
| 1 | IPI00010740                                     | 76131.5  |



|   |                                                              |          |
|---|--------------------------------------------------------------|----------|
| 1 | IPI00749245                                                  | 35368.3  |
| 1 | IPI00218591                                                  | 31980.8  |
| 3 | IPI00301503,IPI00472633,IPI00555647                          | 33648.7  |
| 1 | IPI00010204                                                  | 19312    |
| 1 | IPI00003377                                                  | 27349.5  |
| 2 | IPI00012340,IPI00793205                                      | 25524.9  |
| 2 | IPI00414984,IPI00418183                                      | 52629.2  |
| 1 | IPI00013949                                                  | 34045.9  |
| 4 | IPI00069750,IPI00100716,IPI00788826,IPI00797595              | 59857.6  |
| 1 | IPI00647217                                                  | 117790.3 |
| 1 | IPI00301364                                                  | 18640.3  |
| 1 | IPI00019472                                                  | 56581.8  |
| 1 | IPI00008085                                                  | 94114.2  |
| 2 | IPI00554702,IPI00604710                                      | 64856.9  |
| 1 | IPI00017640                                                  | 167667.5 |
| 1 | IPI00176398                                                  | 95096.1  |
| 2 | IPI00301812,IPI00412898                                      | 48144.5  |
| 1 | IPI00395336                                                  | 49655.8  |
| 1 | IPI00005102                                                  | 41251.6  |
| 1 | IPI00140420                                                  | 101980.5 |
| 1 | IPI00012382                                                  | 31262.4  |
| 6 | IPI00027285,IPI00329512,IPI00384173,IPI00395674,IPI00785142, | 24592.6  |
| 2 | IPI00013396,IPI00641788                                      | 17375.9  |
| 1 | IPI00302850                                                  | 13263.9  |
| 1 | IPI00017963                                                  | 13509.1  |
| 1 | IPI00017964                                                  | 13898.6  |
| 2 | IPI00218733,IPI00783680                                      | 16103.7  |
| 1 | IPI00216057                                                  | 38278.7  |
| 1 | IPI00022608                                                  | 248423.6 |
| 2 | IPI00011643,IPI00376403                                      | 56866.7  |
| 1 | IPI00005292                                                  | 49106.7  |
| 2 | IPI00021000,IPI00385896                                      | 35404.6  |
| 1 | IPI00306339                                                  | 33825.1  |
| 1 | IPI00745092                                                  | 285998.5 |
| 1 | IPI00744706                                                  | 283209.2 |
| 1 | IPI00005614                                                  | 274595.4 |
| 1 | IPI00789296                                                  | 7927.7   |
| 1 | IPI00293434                                                  | 14552.6  |
| 1 | IPI00642816                                                  | 10093.6  |
| 1 | IPI00009032                                                  | 46821    |
| 1 | IPI00032826                                                  | 41314.4  |
| 1 | IPI00001922                                                  | 94751.1  |
| 1 | IPI00013887                                                  | 46588.2  |
| 4 | IPI00000001,IPI00218609,IPI00641873,IPI00643664              | 63165.1  |
| 1 | IPI00008780                                                  | 33230.1  |
| 1 | IPI00013894                                                  | 62624.1  |
| 4 | IPI00479997,IPI00642012,IPI00643115,IPI00744618              | 17285    |
| 1 | IPI00294536                                                  | 38421.4  |
| 1 | IPI00221222                                                  | 14377.9  |
| 4 | IPI00018140,IPI00402182,IPI00402183,IPI00402184              | 69585.5  |
| 1 | IPI00296215                                                  | 34902.2  |
| 2 | IPI00020194,IPI00294426                                      | 61540.8  |
| 1 | IPI00647915                                                  | 24436.4  |
| 2 | IPI00550488,IPI00744692                                      | 35312.2  |
| 1 | IPI00025815                                                  | 44721.7  |
| 1 | IPI00329633                                                  | 83419.8  |
| 1 | IPI00217236                                                  | 12837.2  |
| 4 | IPI00300341,IPI00645048,IPI00791185,IPI00796346              | 12455.4  |
| 1 | IPI00026670                                                  | 13115.2  |

|   |                                                              |          |
|---|--------------------------------------------------------------|----------|
| 1 | IPI00247871                                                  | 123944   |
| 1 | IPI00290566                                                  | 60327.2  |
| 2 | IPI00294619,IPI00788849                                      | 43416.2  |
| 1 | IPI00022462                                                  | 84855.6  |
| 1 | IPI00235354                                                  | 47731.4  |
| 1 | IPI00296099                                                  | 129363.7 |
| 1 | IPI00328840                                                  | 27540.5  |
| 1 | IPI00549189                                                  | 78822.6  |
| 3 | IPI00027166,IPI00787781,IPI00788747                          | 24381.9  |
| 1 | IPI00005563                                                  | 52369    |
| 2 | IPI00643920,IPI00788802                                      | 67861.4  |
| 2 | IPI00298994,IPI00784273                                      | 271152.8 |
| 2 | IPI00301865,IPI00383814                                      | 110089.4 |
| 1 | IPI00443909                                                  | 20634.5  |
| 1 | IPI00005087                                                  | 39578.1  |
| 1 | IPI00216230                                                  | 75475.8  |
| 1 | IPI00024364                                                  | 102340.8 |
| 1 | IPI00419856                                                  | 100393.1 |
| 4 | IPI00218323,IPI00619951,IPI00619958,IPI00782968              | 19845.3  |
| 3 | IPI00383670,IPI00472076,IPI00793361                          | 22431.2  |
| 1 | IPI00743469                                                  | 23721.7  |
| 2 | IPI00465028,IPI00797687                                      | 30772.8  |
| 3 | IPI00178083,IPI00218319,IPI00479185                          | 29061.4  |
| 1 | IPI00010779                                                  | 28504.4  |
| 1 | IPI00009943                                                  | 21508.5  |
| 1 | IPI00641368                                                  | 37790.4  |
| 1 | IPI00018768                                                  | 26165.4  |
| 1 | IPI00030914                                                  | 30320.2  |
| 1 | IPI00029048                                                  | 74385.7  |
| 1 | IPI00180675                                                  | 50117.7  |
| 2 | IPI00387144,IPI00792677                                      | 50133.7  |
| 1 | IPI00011654                                                  | 49652.6  |
| 1 | IPI00031370                                                  | 49935.1  |
| 1 | IPI00007752                                                  | 49812.7  |
| 1 | IPI00013683                                                  | 50414.7  |
| 1 | IPI00646779                                                  | 50072.4  |
| 1 | IPI00216298                                                  | 11719.3  |
| 1 | IPI00008552                                                  | 37414.8  |
| 1 | IPI00646689                                                  | 13922.4  |
| 2 | IPI00743646,IPI00830010                                      | 65796.6  |
| 3 | IPI00031556,IPI00746657,IPI00830039                          | 53483.1  |
| 1 | IPI00645078                                                  | 117832.3 |
| 2 | IPI00032957,IPI00450472                                      | 17989.5  |
| 1 | IPI00021347                                                  | 17844.3  |
| 1 | IPI00003949                                                  | 17120.6  |
| 6 | IPI00019599,IPI00019600,IPI00030962,IPI00397947,IPI00447356, | 25778.9  |
| 1 | IPI00797889                                                  | 16243.7  |
| 1 | IPI00071180                                                  | 59202.6  |
| 1 | IPI00024502                                                  | 63836    |
| 1 | IPI00018352                                                  | 24806.3  |
| 6 | IPI00219512,IPI00219513,IPI00299313,IPI00549820,IPI00549849, | 36061.7  |
| 1 | IPI00301489                                                  | 40769.2  |
| 1 | IPI00375145                                                  | 93291.5  |
| 1 | IPI00646721                                                  | 126254.2 |
| 1 | IPI00642826                                                  | 13741.8  |
| 1 | IPI00334159                                                  | 26518    |
| 4 | IPI00009802,IPI00215628,IPI00215629,IPI00215631              | 372794.6 |
| 2 | IPI00291175,IPI00307162                                      | 116706.3 |
| 1 | IPI00022774                                                  | 89306.8  |

|   |                                                 |          |
|---|-------------------------------------------------|----------|
| 1 | IPI00746388                                     | 69671.9  |
| 3 | IPI00170796,IPI00184284,IPI00798102             | 20488.1  |
| 1 | IPI00018931                                     | 91692    |
| 1 | IPI00216313                                     | 22125.4  |
| 1 | IPI00394834                                     | 81993.1  |
| 1 | IPI00412737                                     | 48835.5  |
| 1 | IPI00746165                                     | 66175.2  |
| 2 | IPI00019269,IPI00789452                         | 33562.8  |
| 1 | IPI00291488                                     | 12974.4  |
| 1 | IPI00001863                                     | 41509.2  |
| 2 | IPI00013178,IPI00795811                         | 40868.1  |
| 2 | IPI00298961,IPI00784388                         | 123370.9 |
| 1 | IPI00220834                                     | 82689.1  |
| 1 | IPI00465430                                     | 69855.4  |
| 1 | IPI00012197                                     | 18663.2  |
| 1 | IPI00432723                                     | 96750    |
| 1 | IPI00007074                                     | 59127.1  |
| 3 | IPI00031812,IPI00385699,IPI00450235             | 34629    |
| 2 | IPI00013981,IPI00477734                         | 60784.7  |
| 2 | IPI00216318,IPI00759832                         | 28065.1  |
| 1 | IPI00000816                                     | 29157    |
| 1 | IPI00220642                                     | 28285.1  |
| 1 | IPI00018146                                     | 27747.4  |
| 1 | IPI00021263                                     | 27727.9  |
| 4 | IPI00013457,IPI00219759,IPI00788670,IPI00792837 | 50733.1  |

## Tandem searching

| H520-Rep1 (HTB182-Fo | H520-Rep2 (HTB182-Fo | H520-Rep3 (HTB182-Fo | # Unique peptide H520-Rep1 (H |
|----------------------|----------------------|----------------------|-------------------------------|
| 100%                 | 100%                 | 0                    | 2                             |
| 100%                 | 0                    | 0                    | 4                             |
| 100%                 | 66%                  | 0                    | 2                             |
| 0                    | 0                    | 100%                 | 0                             |
| 100%                 | 100%                 | 0                    | 5                             |
| 100%                 | 0                    | 100%                 | 6                             |
| 100%                 | 100%                 | 0                    | 3                             |
| 100%                 | 0                    | 100%                 | 9                             |
| 0                    | 100%                 | 0                    | 0                             |
| 0                    | 100%                 | 100%                 | 0                             |
| 100%                 | 0                    | 100%                 | 2                             |
| 0                    | 66%                  | 100%                 | 0                             |
| 100%                 | 100%                 | 100%                 | 3                             |
| 0                    | 100%                 | 100%                 | 0                             |
| 100%                 | 0                    | 0                    | 2                             |
| 100%                 | 100%                 | 100%                 | 2                             |
| 100%                 | 100%                 | 100%                 | 2                             |
| 100%                 | 0                    | 100%                 | 13                            |
| 100%                 | 100%                 | 100%                 | 4                             |
| 100%                 | 100%                 | 100%                 | 14                            |
| 67%                  | 66%                  | 100%                 | 1                             |
| 98%                  | 100%                 | 100%                 | 1                             |
| 100%                 | 100%                 | 100%                 | 14                            |
| 100%                 | 100%                 | 63%                  | 2                             |
| 100%                 | 100%                 | 100%                 | 4                             |
| 100%                 | 100%                 | 100%                 | 3                             |
| 0                    | 0                    | 100%                 | 0                             |
| 100%                 | 66%                  | 63%                  | 2                             |
| 100%                 | 100%                 | 100%                 | 3                             |
| 0                    | 100%                 | 100%                 | 0                             |
| 67%                  | 100%                 | 100%                 | 1                             |
| 67%                  | 66%                  | 100%                 | 1                             |
| 67%                  | 100%                 | 0                    | 1                             |
| 100%                 | 100%                 | 100%                 | 4                             |
| 100%                 | 100%                 | 100%                 | 3                             |
| 100%                 | 100%                 | 100%                 | 2                             |
| 67%                  | 100%                 | 100%                 | 1                             |
| 100%                 | 100%                 | 100%                 | 5                             |
| 67%                  | 66%                  | 100%                 | 1                             |
| 100%                 | 100%                 | 100%                 | 5                             |
| 67%                  | 66%                  | 100%                 | 1                             |
| 100%                 | 100%                 | 100%                 | 5                             |
| 100%                 | 100%                 | 100%                 | 16                            |
| 100%                 | 100%                 | 100%                 | 3                             |
| 100%                 | 100%                 | 100%                 | 12                            |
| 0                    | 0                    | 100%                 | 0                             |
| 100%                 | 100%                 | 100%                 | 6                             |
| 67%                  | 66%                  | 100%                 | 1                             |
| 100%                 | 100%                 | 100%                 | 7                             |
| 100%                 | 66%                  | 100%                 | 2                             |
| 0                    | 100%                 | 0                    | 0                             |
| 100%                 | 100%                 | 100%                 | 3                             |
| 100%                 | 100%                 | 100%                 | 13                            |
| 0                    | 100%                 | 100%                 | 0                             |
| 100%                 | 100%                 | 100%                 | 19                            |

|      |      |      |   |
|------|------|------|---|
| 0    | 100% | 100% | 0 |
| 100% | 100% | 100% | 3 |
| 0    | 0    | 100% | 0 |
| 0    | 66%  | 100% | 0 |
| 0    | 100% | 100% | 0 |
| 0    | 100% | 0    | 0 |
| 67%  | 0    | 100% | 1 |
| 100% | 0    | 63%  | 2 |
| 100% | 100% | 100% | 6 |
| 100% | 100% | 100% | 3 |
| 0    | 0    | 100% | 0 |
| 100% | 0    | 100% | 5 |
| 100% | 0    | 100% | 3 |
| 100% | 100% | 100% | 3 |
| 100% | 100% | 100% | 3 |
| 100% | 66%  | 54%  | 2 |
| 100% | 100% | 100% | 3 |
| 67%  | 0    | 100% | 1 |
| 0    | 100% | 0    | 0 |
| 0    | 66%  | 100% | 0 |
| 67%  | 100% | 100% | 1 |
| 100% | 100% | 100% | 2 |
| 0    | 100% | 100% | 0 |
| 100% | 100% | 100% | 3 |
| 0    | 66%  | 100% | 0 |
| 67%  | 66%  | 100% | 1 |
| 100% | 0    | 100% | 2 |
| 0    | 66%  | 100% | 0 |
| 100% | 100% | 63%  | 2 |
| 100% | 100% | 100% | 2 |
| 67%  | 66%  | 100% | 1 |
| 0    | 0    | 100% | 0 |
| 100% | 100% | 100% | 4 |
| 100% | 100% | 0    | 4 |
| 100% | 100% | 100% | 5 |
| 67%  | 66%  | 98%  | 1 |
| 100% | 100% | 100% | 6 |
| 100% | 100% | 100% | 2 |
| 0    | 100% | 100% | 0 |
| 67%  | 100% | 0    | 1 |
| 100% | 100% | 100% | 6 |
| 100% | 100% | 100% | 3 |
| 67%  | 100% | 100% | 1 |
| 100% | 100% | 100% | 3 |
| 0    | 100% | 0    | 0 |
| 100% | 66%  | 63%  | 2 |
| 100% | 66%  | 98%  | 2 |
| 100% | 64%  | 26%  | 2 |
| 0    | 66%  | 100% | 0 |
| 0    | 100% | 100% | 0 |
| 0    | 100% | 0    | 0 |
| 100% | 100% | 100% | 3 |
| 100% | 100% | 100% | 2 |
| 100% | 99%  | 100% | 3 |
| 100% | 100% | 100% | 4 |
| 100% | 100% | 100% | 2 |
| 100% | 100% | 100% | 3 |
| 100% | 100% | 63%  | 3 |
| 100% | 100% | 100% | 2 |

|      |      |      |      |    |
|------|------|------|------|----|
| 67%  | 100% | 100% | 100% | 1  |
| 100% | 100% | 100% | 100% | 4  |
| 67%  | 0    | 100% | 100% | 1  |
| 0    | 0    | 100% | 100% | 0  |
| 100% | 100% | 100% | 100% | 2  |
| 100% | 100% | 100% | 100% | 9  |
| 100% | 100% | 100% | 100% | 7  |
| 100% | 100% | 100% | 100% | 8  |
| 100% | 100% | 100% | 100% | 3  |
| 100% | 100% | 100% | 100% | 13 |
| 67%  | 100% | 0    | 100% | 1  |
| 100% | 100% | 100% | 100% | 8  |
| 100% | 100% | 100% | 100% | 29 |
| 67%  | 98%  | 63%  | 100% | 1  |
| 100% | 100% | 100% | 100% | 15 |
| 99%  | 0    | 0    | 100% | 1  |
| 100% | 100% | 100% | 100% | 5  |
| 67%  | 0    | 100% | 100% | 1  |
| 100% | 66%  | 63%  | 100% | 2  |
| 100% | 100% | 100% | 100% | 9  |
| 0    | 100% | 100% | 100% | 0  |
| 0    | 0    | 98%  | 100% | 0  |
| 67%  | 0    | 100% | 100% | 1  |
| 100% | 100% | 100% | 100% | 14 |
| 100% | 100% | 100% | 100% | 6  |
| 100% | 100% | 100% | 100% | 10 |
| 67%  | 99%  | 38%  | 100% | 1  |
| 100% | 66%  | 63%  | 100% | 2  |
| 98%  | 100% | 63%  | 100% | 1  |
| 100% | 100% | 100% | 100% | 2  |
| 100% | 100% | 100% | 100% | 6  |
| 100% | 100% | 100% | 100% | 12 |
| 100% | 100% | 0    | 100% | 2  |
| 100% | 0    | 100% | 100% | 3  |
| 0    | 0    | 100% | 100% | 0  |
| 100% | 66%  | 100% | 100% | 3  |
| 100% | 100% | 100% | 100% | 3  |
| 100% | 100% | 100% | 100% | 10 |
| 0    | 100% | 100% | 100% | 0  |
| 100% | 100% | 0    | 100% | 2  |
| 67%  | 100% | 63%  | 100% | 1  |
| 100% | 0    | 0    | 100% | 2  |
| 100% | 100% | 63%  | 100% | 2  |
| 67%  | 0    | 100% | 100% | 1  |
| 100% | 100% | 0    | 100% | 2  |
| 100% | 100% | 0    | 100% | 1  |
| 100% | 100% | 0    | 100% | 1  |
| 100% | 100% | 100% | 100% | 4  |
| 100% | 100% | 100% | 100% | 3  |
| 100% | 100% | 100% | 100% | 3  |
| 100% | 45%  | 0    | 100% | 2  |
| 100% | 100% | 100% | 100% | 4  |
| 100% | 100% | 100% | 100% | 3  |
| 100% | 100% | 100% | 100% | 3  |
| 67%  | 66%  | 100% | 100% | 1  |
| 0    | 0    | 100% | 100% | 0  |
| 100% | 100% | 100% | 100% | 2  |
| 67%  | 66%  | 100% | 100% | 1  |
| 67%  | 66%  | 100% | 100% | 1  |

|      |      |      |    |
|------|------|------|----|
| 100% | 100% | 100% | 4  |
| 0    | 0    | 98%  | 0  |
| 100% | 100% | 100% | 4  |
| 67%  | 100% | 100% | 1  |
| 100% | 100% | 100% | 2  |
| 67%  | 66%  | 98%  | 1  |
| 100% | 66%  | 100% | 3  |
| 100% | 100% | 100% | 10 |
| 100% | 100% | 100% | 4  |
| 100% | 100% | 100% | 4  |
| 100% | 66%  | 100% | 3  |
| 100% | 66%  | 100% | 5  |
| 0    | 100% | 100% | 0  |
| 99%  | 66%  | 99%  | 1  |
| 0    | 100% | 0    | 0  |
| 39%  | 0    | 100% | 0  |
| 0    | 100% | 0    | 0  |
| 100% | 66%  | 63%  | 2  |
| 40%  | 100% | 100% | 0  |
| 100% | 66%  | 100% | 2  |
| 100% | 100% | 63%  | 4  |
| 100% | 66%  | 100% | 5  |
| 67%  | 100% | 100% | 1  |
| 100% | 0    | 100% | 2  |
| 100% | 100% | 100% | 6  |
| 100% | 66%  | 100% | 3  |
| 67%  | 100% | 12%  | 1  |
| 100% | 0    | 63%  | 2  |
| 0    | 66%  | 100% | 0  |
| 67%  | 0    | 100% | 1  |
| 100% | 100% | 100% | 16 |
| 100% | 100% | 63%  | 5  |
| 100% | 100% | 100% | 6  |
| 67%  | 100% | 63%  | 1  |
| 100% | 0    | 100% | 4  |
| 0    | 100% | 100% | 0  |
| 100% | 0    | 100% | 3  |
| 100% | 100% | 100% | 12 |
| 100% | 100% | 100% | 4  |
| 100% | 100% | 100% | 3  |
| 100% | 100% | 100% | 8  |
| 100% | 100% | 100% | 13 |
| 0    | 0    | 100% | 0  |
| 67%  | 100% | 62%  | 1  |
| 100% | 100% | 100% | 2  |
| 100% | 66%  | 100% | 2  |
| 99%  | 66%  | 100% | 1  |
| 100% | 100% | 100% | 3  |
| 0    | 100% | 97%  | 0  |
| 98%  | 66%  | 0    | 1  |
| 67%  | 100% | 100% | 1  |
| 0    | 0    | 100% | 0  |
| 100% | 100% | 100% | 3  |
| 100% | 100% | 99%  | 2  |
| 100% | 0    | 100% | 2  |
| 67%  | 66%  | 99%  | 1  |
| 100% | 100% | 100% | 8  |
| 98%  | 0    | 100% | 1  |
| 100% | 100% | 100% | 6  |

|      |      |      |    |
|------|------|------|----|
| 100% | 100% | 100% | 17 |
| 0    | 100% | 100% | 0  |
| 100% | 66%  | 100% | 2  |
| 67%  | 0    | 100% | 1  |
| 100% | 66%  | 100% | 2  |
| 100% | 98%  | 100% | 2  |
| 0    | 100% | 100% | 0  |
| 100% | 100% | 100% | 3  |
| 100% | 100% | 100% | 2  |
| 100% | 100% | 100% | 5  |
| 100% | 100% | 100% | 4  |
| 67%  | 100% | 0    | 1  |
| 100% | 0    | 100% | 1  |
| 100% | 100% | 100% | 9  |
| 100% | 100% | 100% | 3  |
| 100% | 66%  | 99%  | 2  |
| 100% | 100% | 100% | 14 |
| 100% | 100% | 100% | 6  |
| 100% | 100% | 100% | 3  |
| 100% | 100% | 100% | 5  |
| 100% | 100% | 100% | 7  |
| 67%  | 66%  | 100% | 1  |
| 100% | 0    | 0    | 2  |
| 100% | 100% | 100% | 6  |
| 100% | 100% | 100% | 6  |
| 100% | 100% | 100% | 2  |
| 100% | 0    | 0    | 2  |
| 100% | 100% | 100% | 7  |
| 100% | 100% | 100% | 3  |
| 0    | 100% | 100% | 0  |
| 0    | 100% | 100% | 0  |
| 100% | 100% | 100% | 5  |
| 100% | 100% | 100% | 10 |
| 67%  | 100% | 100% | 1  |
| 100% | 100% | 100% | 3  |
| 100% | 66%  | 100% | 3  |
| 100% | 100% | 100% | 3  |
| 100% | 100% | 100% | 5  |
| 100% | 0    | 63%  | 1  |
| 100% | 100% | 100% | 3  |
| 100% | 100% | 0    | 2  |
| 100% | 66%  | 100% | 3  |
| 100% | 100% | 100% | 3  |
| 100% | 0    | 100% | 2  |
| 67%  | 0    | 100% | 1  |
| 67%  | 0    | 100% | 1  |
| 100% | 100% | 100% | 3  |
| 100% | 100% | 100% | 4  |
| 100% | 100% | 100% | 14 |
| 100% | 100% | 100% | 12 |
| 100% | 100% | 100% | 4  |
| 67%  | 66%  | 100% | 1  |
| 100% | 100% | 100% | 5  |
| 100% | 100% | 100% | 5  |
| 100% | 100% | 100% | 13 |
| 100% | 100% | 100% | 11 |
| 100% | 66%  | 100% | 1  |
| 100% | 100% | 99%  | 2  |
| 67%  | 100% | 0    | 1  |



|      |      |      |    |
|------|------|------|----|
| 100% | 100% | 100% | 3  |
| 0    | 99%  | 100% | 0  |
| 67%  | 100% | 100% | 1  |
| 99%  | 0    | 63%  | 1  |
| 100% | 100% | 100% | 4  |
| 67%  | 66%  | 100% | 1  |
| 100% | 100% | 100% | 7  |
| 100% | 100% | 63%  | 2  |
| 99%  | 0    | 63%  | 1  |
| 67%  | 66%  | 100% | 1  |
| 100% | 100% | 100% | 5  |
| 22%  | 0    | 100% | 0  |
| 100% | 100% | 100% | 7  |
| 100% | 100% | 100% | 12 |
| 100% | 100% | 100% | 4  |
| 100% | 100% | 100% | 4  |
| 100% | 66%  | 100% | 2  |
| 100% | 100% | 0    | 4  |
| 67%  | 100% | 63%  | 1  |
| 100% | 100% | 100% | 12 |
| 100% | 100% | 100% | 2  |
| 67%  | 100% | 100% | 1  |
| 100% | 98%  | 0    | 3  |
| 100% | 100% | 100% | 9  |
| 100% | 100% | 100% | 4  |
| 100% | 98%  | 100% | 2  |
| 100% | 100% | 100% | 4  |
| 67%  | 66%  | 100% | 1  |
| 0    | 0    | 100% | 0  |
| 100% | 0    | 0    | 2  |
| 100% | 100% | 0    | 7  |
| 100% | 66%  | 100% | 2  |
| 100% | 100% | 100% | 6  |
| 100% | 0    | 98%  | 2  |
| 0    | 100% | 0    | 0  |
| 0    | 100% | 0    | 0  |
| 0    | 0    | 100% | 0  |
| 100% | 0    | 0    | 2  |
| 100% | 100% | 100% | 8  |
| 100% | 100% | 0    | 2  |
| 0    | 100% | 0    | 0  |
| 0    | 0    | 100% | 0  |
| 67%  | 100% | 63%  | 1  |
| 67%  | 100% | 0    | 1  |
| 0    | 98%  | 63%  | 0  |
| 67%  | 0    | 100% | 1  |
| 100% | 100% | 100% | 7  |
| 100% | 66%  | 63%  | 1  |
| 100% | 0    | 100% | 3  |
| 100% | 100% | 100% | 2  |
| 100% | 0    | 100% | 13 |
| 100% | 100% | 100% | 13 |
| 100% | 100% | 100% | 7  |
| 100% | 100% | 100% | 5  |
| 100% | 100% | 100% | 2  |
| 100% | 100% | 100% | 5  |
| 100% | 100% | 100% | 10 |
| 67%  | 66%  | 99%  | 1  |
| 100% | 100% | 100% | 4  |

|      |      |      |    |
|------|------|------|----|
| 100% | 100% | 100% | 6  |
| 100% | 100% | 100% | 6  |
| 67%  | 100% | 100% | 1  |
| 0    | 66%  | 100% | 0  |
| 100% | 100% | 100% | 3  |
| 67%  | 100% | 100% | 1  |
| 0    | 0    | 100% | 0  |
| 100% | 100% | 100% | 10 |
| 100% | 100% | 100% | 6  |
| 100% | 100% | 100% | 9  |
| 100% | 100% | 100% | 8  |
| 100% | 100% | 100% | 14 |
| 100% | 100% | 100% | 23 |
| 67%  | 100% | 100% | 1  |
| 100% | 100% | 100% | 3  |
| 100% | 100% | 100% | 4  |
| 0    | 100% | 0    | 0  |
| 100% | 0    | 100% | 5  |
| 100% | 100% | 100% | 2  |
| 100% | 0    | 100% | 2  |
| 100% | 100% | 100% | 2  |
| 67%  | 100% | 0    | 1  |
| 16%  | 10%  | 100% | 0  |
| 100% | 66%  | 100% | 3  |
| 0    | 100% | 100% | 0  |
| 100% | 100% | 100% | 7  |
| 100% | 100% | 100% | 11 |
| 100% | 100% | 100% | 7  |
| 100% | 100% | 100% | 6  |
| 100% | 100% | 100% | 9  |
| 0    | 99%  | 63%  | 0  |
| 100% | 100% | 63%  | 2  |
| 100% | 100% | 100% | 4  |
| 100% | 100% | 100% | 5  |
| 67%  | 100% | 0    | 1  |
| 100% | 100% | 100% | 2  |
| 100% | 100% | 100% | 4  |
| 67%  | 100% | 0    | 1  |
| 67%  | 38%  | 100% | 1  |
| 100% | 100% | 63%  | 3  |
| 100% | 100% | 100% | 5  |
| 100% | 66%  | 100% | 3  |
| 100% | 100% | 100% | 8  |
| 0    | 98%  | 0    | 0  |
| 100% | 0    | 0    | 2  |
| 100% | 100% | 100% | 3  |
| 100% | 100% | 100% | 2  |
| 100% | 100% | 100% | 7  |
| 100% | 100% | 100% | 1  |
| 100% | 100% | 100% | 3  |
| 0    | 99%  | 100% | 0  |
| 100% | 100% | 100% | 2  |
| 99%  | 14%  | 0    | 1  |
| 67%  | 100% | 100% | 1  |
| 100% | 0    | 0    | 2  |
| 0    | 100% | 100% | 0  |
| 67%  | 100% | 100% | 1  |
| 67%  | 66%  | 100% | 1  |
| 67%  | 100% | 100% | 1  |

|      |      |      |    |
|------|------|------|----|
| 100% | 100% | 100% | 12 |
| 100% | 100% | 100% | 6  |
| 67%  | 99%  | 100% | 1  |
| 100% | 100% | 100% | 4  |
| 100% | 66%  | 100% | 2  |
| 100% | 100% | 100% | 4  |
| 100% | 100% | 100% | 15 |
| 0    | 0    | 98%  | 0  |
| 100% | 100% | 100% | 9  |
| 100% | 66%  | 63%  | 2  |
| 99%  | 100% | 100% | 1  |
| 100% | 100% | 100% | 2  |
| 100% | 100% | 100% | 3  |
| 100% | 100% | 100% | 3  |
| 67%  | 100% | 0    | 1  |
| 0    | 100% | 0    | 0  |
| 0    | 66%  | 100% | 0  |
| 100% | 100% | 100% | 5  |
| 100% | 66%  | 100% | 2  |
| 100% | 100% | 100% | 7  |
| 0    | 100% | 0    | 0  |
| 67%  | 0    | 100% | 1  |
| 100% | 66%  | 100% | 2  |
| 100% | 100% | 100% | 4  |
| 100% | 100% | 100% | 3  |
| 99%  | 0    | 22%  | 1  |
| 67%  | 0    | 100% | 1  |
| 100% | 66%  | 0    | 1  |
| 99%  | 0    | 63%  | 1  |
| 100% | 100% | 100% | 5  |
| 100% | 66%  | 100% | 4  |
| 100% | 100% | 100% | 5  |
| 99%  | 100% | 0    | 1  |
| 67%  | 0    | 100% | 1  |
| 100% | 99%  | 0    | 2  |
| 0    | 0    | 100% | 0  |
| 100% | 100% | 100% | 7  |
| 67%  | 99%  | 0    | 1  |
| 67%  | 100% | 63%  | 1  |
| 100% | 100% | 100% | 4  |
| 100% | 98%  | 100% | 3  |
| 67%  | 100% | 0    | 1  |
| 100% | 100% | 100% | 5  |
| 0    | 66%  | 100% | 0  |
| 0    | 0    | 98%  | 0  |
| 0    | 0    | 100% | 0  |
| 100% | 66%  | 63%  | 2  |
| 100% | 100% | 100% | 5  |
| 100% | 100% | 100% | 2  |
| 100% | 100% | 100% | 2  |
| 99%  | 100% | 100% | 1  |
| 100% | 100% | 100% | 4  |
| 100% | 100% | 100% | 8  |
| 0    | 0    | 100% | 0  |
| 100% | 100% | 63%  | 2  |
| 100% | 100% | 100% | 2  |
| 67%  | 0    | 100% | 1  |
| 100% | 0    | 0    | 2  |
| 100% | 0    | 0    | 2  |

|      |      |      |    |
|------|------|------|----|
| 100% | 100% | 100% | 7  |
| 100% | 66%  | 100% | 2  |
| 67%  | 66%  | 100% | 1  |
| 0    | 100% | 100% | 0  |
| 67%  | 100% | 0    | 1  |
| 100% | 100% | 100% | 3  |
| 39%  | 66%  | 100% | 0  |
| 100% | 66%  | 100% | 2  |
| 100% | 100% | 100% | 3  |
| 100% | 0    | 63%  | 2  |
| 0    | 66%  | 100% | 0  |
| 100% | 100% | 100% | 5  |
| 67%  | 100% | 63%  | 1  |
| 0    | 0    | 100% | 0  |
| 100% | 100% | 100% | 3  |
| 100% | 100% | 100% | 12 |
| 100% | 66%  | 100% | 3  |
| 100% | 17%  | 100% | 2  |
| 100% | 100% | 100% | 10 |
| 0    | 100% | 100% | 0  |
| 100% | 100% | 100% | 11 |
| 100% | 100% | 100% | 2  |
| 100% | 100% | 100% | 12 |
| 100% | 100% | 100% | 3  |
| 67%  | 100% | 63%  | 1  |
| 100% | 100% | 100% | 3  |
| 100% | 100% | 100% | 7  |
| 100% | 12%  | 63%  | 2  |
| 67%  | 0    | 100% | 1  |
| 100% | 100% | 100% | 23 |
| 67%  | 0    | 100% | 1  |
| 100% | 0    | 100% | 2  |
| 100% | 100% | 100% | 15 |
| 100% | 0    | 100% | 3  |
| 0    | 100% | 63%  | 0  |
| 67%  | 100% | 100% | 1  |
| 100% | 100% | 100% | 3  |
| 100% | 100% | 100% | 4  |
| 100% | 100% | 100% | 2  |
| 100% | 100% | 100% | 3  |
| 100% | 100% | 100% | 5  |
| 100% | 100% | 100% | 2  |
| 100% | 100% | 100% | 10 |
| 0    | 100% | 100% | 0  |
| 100% | 0    | 63%  | 2  |
| 100% | 100% | 100% | 2  |
| 67%  | 66%  | 100% | 1  |
| 100% | 100% | 100% | 8  |
| 100% | 66%  | 100% | 2  |
| 100% | 100% | 100% | 4  |
| 100% | 100% | 100% | 2  |
| 100% | 66%  | 100% | 2  |
| 100% | 100% | 100% | 7  |
| 100% | 100% | 100% | 2  |
| 100% | 100% | 99%  | 2  |
| 100% | 100% | 100% | 4  |
| 100% | 100% | 100% | 4  |
| 100% | 66%  | 100% | 6  |
| 67%  | 66%  | 100% | 1  |

|      |      |      |    |
|------|------|------|----|
| 0    | 100% | 0    | 0  |
| 100% | 0    | 100% | 4  |
| 100% | 100% | 100% | 2  |
| 0    | 66%  | 99%  | 0  |
| 100% | 100% | 100% | 4  |
| 67%  | 39%  | 100% | 1  |
| 67%  | 100% | 63%  | 1  |
| 100% | 66%  | 63%  | 2  |
| 100% | 100% | 100% | 2  |
| 100% | 100% | 100% | 9  |
| 100% | 0    | 100% | 3  |
| 100% | 100% | 100% | 5  |
| 100% | 100% | 100% | 7  |
| 100% | 100% | 100% | 13 |
| 67%  | 100% | 0    | 1  |
| 100% | 100% | 63%  | 3  |
| 100% | 100% | 100% | 4  |
| 100% | 100% | 100% | 2  |
| 100% | 100% | 100% | 8  |
| 100% | 100% | 100% | 16 |
| 100% | 100% | 63%  | 2  |
| 100% | 100% | 100% | 2  |
| 67%  | 100% | 63%  | 1  |
| 0    | 100% | 100% | 0  |
| 100% | 66%  | 100% | 2  |
| 100% | 100% | 100% | 2  |
| 0    | 100% | 0    | 0  |
| 100% | 100% | 100% | 19 |
| 100% | 66%  | 100% | 2  |
| 100% | 100% | 100% | 4  |
| 100% | 100% | 100% | 7  |
| 100% | 100% | 100% | 5  |
| 100% | 100% | 100% | 14 |
| 100% | 100% | 100% | 9  |
| 100% | 100% | 100% | 9  |
| 100% | 0    | 0    | 2  |
| 67%  | 66%  | 100% | 1  |
| 100% | 66%  | 0    | 2  |
| 100% | 100% | 100% | 2  |
| 100% | 66%  | 63%  | 2  |
| 100% | 100% | 100% | 4  |
| 100% | 0    | 100% | 6  |
| 100% | 100% | 100% | 16 |
| 100% | 100% | 100% | 5  |
| 100% | 100% | 100% | 2  |
| 100% | 0    | 63%  | 2  |
| 0    | 100% | 0    | 0  |
| 100% | 100% | 100% | 11 |
| 100% | 100% | 100% | 4  |
| 0    | 19%  | 100% | 0  |
| 100% | 0    | 63%  | 2  |
| 100% | 100% | 100% | 2  |
| 0    | 0    | 100% | 0  |
| 100% | 100% | 63%  | 2  |
| 100% | 0    | 0    | 2  |
| 99%  | 66%  | 63%  | 1  |
| 100% | 100% | 100% | 3  |
| 67%  | 66%  | 100% | 1  |
| 99%  | 100% | 63%  | 1  |

|      |      |      |    |
|------|------|------|----|
| 100% | 100% | 100% | 2  |
| 100% | 100% | 100% | 5  |
| 100% | 0    | 63%  | 3  |
| 100% | 17%  | 0    | 3  |
| 100% | 100% | 100% | 3  |
| 100% | 100% | 63%  | 3  |
| 100% | 100% | 100% | 3  |
| 100% | 100% | 100% | 5  |
| 100% | 100% | 100% | 3  |
| 100% | 66%  | 100% | 3  |
| 67%  | 66%  | 100% | 1  |
| 0    | 100% | 63%  | 0  |
| 0    | 98%  | 63%  | 0  |
| 0    | 0    | 100% | 0  |
| 0    | 0    | 100% | 0  |
| 100% | 100% | 100% | 5  |
| 67%  | 0    | 100% | 1  |
| 67%  | 0    | 100% | 1  |
| 0    | 66%  | 100% | 0  |
| 0    | 100% | 63%  | 0  |
| 100% | 100% | 63%  | 3  |
| 100% | 66%  | 35%  | 2  |
| 100% | 0    | 100% | 7  |
| 100% | 100% | 100% | 3  |
| 100% | 66%  | 100% | 2  |
| 100% | 100% | 100% | 6  |
| 67%  | 100% | 100% | 1  |
| 100% | 100% | 100% | 4  |
| 100% | 100% | 100% | 11 |
| 100% | 100% | 100% | 1  |
| 0    | 100% | 100% | 0  |
| 100% | 0    | 100% | 24 |
| 100% | 100% | 100% | 4  |
| 100% | 100% | 100% | 3  |
| 100% | 100% | 100% | 3  |
| 100% | 100% | 100% | 4  |
| 100% | 100% | 100% | 16 |
| 100% | 66%  | 0    | 1  |
| 100% | 100% | 63%  | 3  |
| 100% | 100% | 100% | 9  |
| 0    | 65%  | 100% | 0  |
| 100% | 100% | 100% | 4  |
| 0    | 0    | 100% | 0  |
| 100% | 100% | 100% | 4  |
| 100% | 31%  | 0    | 2  |
| 67%  | 98%  | 63%  | 1  |
| 100% | 0    | 100% | 3  |
| 67%  | 100% | 14%  | 1  |
| 67%  | 0    | 100% | 1  |
| 0    | 100% | 0    | 0  |
| 0    | 100% | 100% | 0  |
| 67%  | 99%  | 99%  | 1  |
| 100% | 100% | 100% | 6  |
| 100% | 0    | 0    | 2  |
| 67%  | 60%  | 100% | 1  |
| 67%  | 66%  | 100% | 1  |
| 0    | 100% | 0    | 0  |
| 100% | 0    | 63%  | 2  |
| 100% | 66%  | 0    | 2  |

|      |      |      |    |
|------|------|------|----|
| 100% | 0    | 100% | 3  |
| 100% | 100% | 100% | 11 |
| 100% | 66%  | 100% | 2  |
| 100% | 100% | 100% | 7  |
| 0    | 19%  | 98%  | 0  |
| 0    | 0    | 100% | 0  |
| 100% | 0    | 100% | 2  |
| 67%  | 66%  | 100% | 1  |
| 100% | 0    | 100% | 3  |
| 100% | 0    | 63%  | 2  |
| 0    | 99%  | 0    | 0  |
| 100% | 100% | 0    | 10 |
| 100% | 100% | 100% | 4  |
| 0    | 100% | 0    | 0  |
| 67%  | 0    | 99%  | 1  |
| 67%  | 100% | 100% | 1  |
| 67%  | 100% | 63%  | 1  |
| 100% | 100% | 100% | 8  |
| 99%  | 100% | 100% | 1  |
| 0    | 66%  | 99%  | 0  |
| 67%  | 100% | 63%  | 1  |
| 0    | 100% | 100% | 0  |
| 100% | 100% | 100% | 2  |
| 100% | 66%  | 100% | 2  |
| 100% | 100% | 100% | 2  |
| 100% | 100% | 100% | 2  |
| 100% | 100% | 100% | 2  |
| 0    | 100% | 0    | 0  |
| 100% | 100% | 100% | 2  |
| 0    | 100% | 100% | 0  |
| 100% | 100% | 100% | 2  |
| 0    | 98%  | 63%  | 0  |
| 67%  | 100% | 100% | 1  |
| 100% | 0    | 100% | 6  |
| 100% | 66%  | 0    | 3  |
| 0    | 0    | 100% | 0  |
| 98%  | 66%  | 0    | 1  |
| 100% | 100% | 100% | 4  |
| 100% | 100% | 100% | 5  |
| 100% | 100% | 100% | 7  |
| 100% | 100% | 100% | 5  |
| 100% | 100% | 100% | 5  |
| 0    | 100% | 100% | 0  |
| 0    | 100% | 0    | 0  |
| 0    | 100% | 0    | 0  |
| 67%  | 100% | 63%  | 1  |
| 0    | 100% | 63%  | 0  |
| 100% | 100% | 100% | 3  |
| 100% | 100% | 100% | 11 |
| 100% | 100% | 100% | 10 |
| 100% | 100% | 100% | 8  |
| 0    | 99%  | 100% | 0  |
| 67%  | 66%  | 100% | 1  |
| 100% | 100% | 63%  | 2  |
| 100% | 100% | 100% | 4  |
| 67%  | 0    | 100% | 1  |
| 100% | 66%  | 63%  | 2  |
| 100% | 0    | 63%  | 2  |
| 100% | 100% | 100% | 4  |

|      |      |      |    |
|------|------|------|----|
| 100% | 100% | 100% | 3  |
| 98%  | 100% | 100% | 1  |
| 67%  | 0    | 98%  | 1  |
| 0    | 100% | 0    | 0  |
| 67%  | 0    | 100% | 1  |
| 100% | 66%  | 100% | 2  |
| 0    | 66%  | 100% | 0  |
| 100% | 66%  | 100% | 3  |
| 100% | 100% | 100% | 2  |
| 0    | 0    | 100% | 0  |
| 100% | 100% | 0    | 3  |
| 100% | 100% | 100% | 2  |
| 100% | 100% | 100% | 5  |
| 100% | 100% | 100% | 15 |
| 11%  | 100% | 100% | 0  |
| 100% | 100% | 100% | 8  |
| 0    | 66%  | 100% | 0  |
| 100% | 100% | 100% | 5  |
| 100% | 100% | 100% | 5  |
| 0    | 0    | 100% | 0  |
| 100% | 0    | 100% | 3  |
| 0    | 100% | 100% | 0  |
| 100% | 99%  | 100% | 2  |
| 67%  | 100% | 63%  | 1  |
| 0    | 100% | 63%  | 0  |
| 67%  | 66%  | 100% | 1  |
| 100% | 100% | 100% | 3  |
| 100% | 0    | 0    | 2  |
| 67%  | 99%  | 100% | 1  |
| 100% | 100% | 100% | 5  |
| 67%  | 66%  | 100% | 1  |
| 100% | 100% | 100% | 8  |
| 100% | 66%  | 0    | 8  |
| 100% | 0    | 0    | 10 |
| 0    | 100% | 100% | 0  |
| 100% | 100% | 100% | 9  |
| 0    | 0    | 100% | 0  |
| 100% | 0    | 0    | 2  |
| 100% | 0    | 100% | 2  |
| 100% | 100% | 100% | 2  |
| 100% | 100% | 100% | 3  |
| 100% | 100% | 100% | 9  |
| 100% | 100% | 100% | 2  |
| 100% | 100% | 0    | 2  |
| 100% | 100% | 100% | 3  |
| 100% | 100% | 100% | 11 |
| 100% | 66%  | 63%  | 2  |
| 98%  | 100% | 100% | 1  |
| 67%  | 66%  | 100% | 1  |
| 100% | 100% | 100% | 12 |
| 100% | 100% | 100% | 3  |
| 67%  | 100% | 100% | 1  |
| 100% | 100% | 100% | 8  |
| 100% | 100% | 100% | 3  |
| 67%  | 98%  | 63%  | 1  |
| 100% | 100% | 100% | 4  |
| 98%  | 100% | 100% | 1  |
| 99%  | 0    | 63%  | 1  |
| 100% | 0    | 100% | 2  |



|      |      |      |    |
|------|------|------|----|
| 100% | 0    | 63%  | 2  |
| 100% | 0    | 63%  | 2  |
| 35%  | 0    | 100% | 0  |
| 100% | 100% | 100% | 15 |
| 100% | 100% | 100% | 8  |
| 100% | 100% | 100% | 4  |
| 100% | 100% | 100% | 4  |
| 0    | 66%  | 100% | 0  |
| 100% | 100% | 100% | 5  |
| 100% | 100% | 100% | 11 |
| 100% | 100% | 100% | 11 |
| 100% | 100% | 100% | 3  |
| 100% | 100% | 100% | 5  |
| 100% | 66%  | 0    | 2  |
| 67%  | 66%  | 100% | 1  |
| 100% | 100% | 0    | 3  |
| 100% | 66%  | 0    | 3  |
| 67%  | 0    | 100% | 1  |
| 100% | 100% | 100% | 4  |
| 100% | 66%  | 0    | 2  |
| 67%  | 100% | 0    | 1  |
| 100% | 100% | 100% | 13 |
| 100% | 100% | 100% | 6  |
| 100% | 100% | 100% | 6  |
| 100% | 100% | 100% | 3  |
| 100% | 66%  | 0    | 1  |
| 100% | 66%  | 100% | 2  |
| 67%  | 0    | 100% | 1  |
| 0    | 66%  | 100% | 0  |
| 100% | 100% | 0    | 1  |
| 100% | 100% | 100% | 14 |
| 100% | 100% | 100% | 2  |
| 100% | 100% | 100% | 17 |
| 100% | 100% | 100% | 6  |
| 0    | 100% | 63%  | 0  |
| 100% | 66%  | 63%  | 2  |
| 100% | 100% | 100% | 5  |
| 0    | 99%  | 100% | 0  |
| 100% | 100% | 100% | 3  |
| 0    | 100% | 0    | 0  |
| 100% | 99%  | 100% | 2  |
| 100% | 100% | 100% | 6  |
| 100% | 100% | 100% | 4  |
| 100% | 100% | 100% | 3  |
| 67%  | 100% | 100% | 1  |
| 0    | 100% | 0    | 0  |
| 0    | 0    | 100% | 0  |
| 100% | 0    | 63%  | 5  |
| 100% | 0    | 0    | 2  |
| 100% | 100% | 100% | 5  |
| 0    | 66%  | 99%  | 0  |
| 0    | 99%  | 100% | 0  |
| 100% | 100% | 100% | 3  |
| 0    | 66%  | 100% | 0  |
| 100% | 0    | 0    | 2  |
| 67%  | 0    | 100% | 1  |
| 100% | 100% | 100% | 3  |
| 47%  | 100% | 100% | 0  |
| 100% | 100% | 100% | 10 |

|      |      |      |    |
|------|------|------|----|
| 100% | 100% | 100% | 4  |
| 67%  | 19%  | 100% | 1  |
| 99%  | 100% | 100% | 1  |
| 100% | 100% | 100% | 5  |
| 100% | 100% | 100% | 19 |
| 0    | 100% | 100% | 0  |
| 100% | 100% | 100% | 5  |
| 0    | 100% | 0    | 0  |
| 100% | 100% | 100% | 2  |
| 100% | 100% | 100% | 7  |
| 67%  | 100% | 63%  | 1  |
| 100% | 100% | 100% | 2  |
| 100% | 100% | 100% | 4  |
| 100% | 100% | 100% | 6  |
| 100% | 100% | 100% | 4  |
| 67%  | 100% | 19%  | 1  |
| 67%  | 66%  | 100% | 1  |
| 100% | 100% | 100% | 5  |
| 99%  | 0    | 99%  | 1  |
| 0    | 100% | 0    | 0  |
| 100% | 100% | 100% | 6  |
| 0    | 100% | 63%  | 0  |
| 67%  | 100% | 100% | 1  |
| 100% | 100% | 100% | 5  |
| 100% | 66%  | 100% | 2  |

| # Unique peptide H520-Rep2 (H) | # Unique peptide H520-Rep3 (H) | # Unique peptide Control |
|--------------------------------|--------------------------------|--------------------------|
| 2                              | 0                              | 0                        |
| 0                              | 0                              | 0                        |
| 1                              | 0                              | 0                        |
| 0                              | 3                              | 0                        |
| 4                              | 0                              | 0                        |
| 0                              | 12                             | 0                        |
| 3                              | 0                              | 0                        |
| 0                              | 9                              | 0                        |
| 2                              | 0                              | 0                        |
| 25                             | 32                             | 0                        |
| 0                              | 4                              | 0                        |
| 1                              | 2                              | 0                        |
| 2                              | 2                              | 0                        |
| 2                              | 5                              | 0                        |
| 0                              | 0                              | 0                        |
| 4                              | 2                              | 0                        |
| 3                              | 3                              | 0                        |
| 0                              | 18                             | 0                        |
| 3                              | 4                              | 0                        |
| 18                             | 24                             | 0                        |
| 1                              | 3                              | 0                        |
| 6                              | 6                              | 0                        |
| 14                             | 17                             | 0                        |
| 2                              | 1                              | 0                        |
| 3                              | 3                              | 0                        |
| 2                              | 3                              | 0                        |
| 0                              | 2                              | 0                        |
| 1                              | 1                              | 0                        |
| 5                              | 3                              | 0                        |
| 2                              | 2                              | 0                        |
| 3                              | 2                              | 0                        |
| 1                              | 2                              | 0                        |
| 2                              | 0                              | 0                        |
| 9                              | 9                              | 0                        |
| 6                              | 7                              | 0                        |
| 2                              | 3                              | 0                        |
| 2                              | 2                              | 0                        |
| 7                              | 5                              | 0                        |
| 1                              | 2                              | 0                        |
| 11                             | 9                              | 0                        |
| 1                              | 3                              | 0                        |
| 6                              | 9                              | 0                        |
| 17                             | 17                             | 0                        |
| 4                              | 4                              | 0                        |
| 13                             | 13                             | 0                        |
| 0                              | 2                              | 0                        |
| 7                              | 7                              | 0                        |
| 1                              | 2                              | 0                        |
| 9                              | 12                             | 0                        |
| 1                              | 3                              | 0                        |
| 2                              | 0                              | 0                        |
| 5                              | 6                              | 0                        |
| 12                             | 15                             | 0                        |
| 3                              | 2                              | 0                        |
| 17                             | 22                             | 0                        |

|   |   |   |
|---|---|---|
| 2 | 2 | 0 |
| 2 | 3 | 0 |
| 0 | 2 | 0 |
| 1 | 3 | 0 |
| 2 | 9 | 0 |
| 2 | 0 | 0 |
| 0 | 2 | 0 |
| 0 | 1 | 0 |
| 6 | 4 | 0 |
| 3 | 3 | 0 |
| 0 | 2 | 0 |
| 0 | 8 | 0 |
| 0 | 3 | 0 |
| 3 | 4 | 0 |
| 2 | 2 | 0 |
| 1 | 0 | 0 |
| 2 | 2 | 0 |
| 0 | 2 | 0 |
| 2 | 0 | 0 |
| 1 | 2 | 0 |
| 3 | 3 | 0 |
| 2 | 2 | 0 |
| 2 | 6 | 0 |
| 3 | 2 | 0 |
| 1 | 2 | 0 |
| 1 | 3 | 0 |
| 0 | 4 | 0 |
| 1 | 2 | 0 |
| 2 | 1 | 0 |
| 3 | 3 | 0 |
| 1 | 2 | 0 |
| 0 | 2 | 0 |
| 5 | 5 | 0 |
| 5 | 0 | 0 |
| 3 | 6 | 0 |
| 1 | 1 | 0 |
| 6 | 5 | 0 |
| 2 | 2 | 0 |
| 9 | 8 | 0 |
| 2 | 0 | 0 |
| 3 | 5 | 0 |
| 2 | 3 | 0 |
| 3 | 6 | 0 |
| 3 | 2 | 0 |
| 4 | 0 | 0 |
| 1 | 1 | 0 |
| 1 | 1 | 0 |
| 0 | 0 | 0 |
| 1 | 2 | 0 |
| 7 | 4 | 0 |
| 2 | 0 | 0 |
| 4 | 4 | 0 |
| 3 | 4 | 0 |
| 1 | 3 | 0 |
| 4 | 3 | 0 |
| 3 | 7 | 0 |
| 2 | 6 | 0 |
| 3 | 1 | 0 |
| 5 | 5 | 0 |

|    |    |   |
|----|----|---|
| 2  | 2  | 0 |
| 3  | 5  | 0 |
| 0  | 2  | 0 |
| 0  | 3  | 0 |
| 2  | 3  | 0 |
| 9  | 14 | 0 |
| 10 | 6  | 0 |
| 3  | 8  | 0 |
| 3  | 4  | 0 |
| 15 | 15 | 0 |
| 2  | 0  | 0 |
| 9  | 10 | 0 |
| 22 | 31 | 0 |
| 1  | 1  | 0 |
| 23 | 21 | 0 |
| 0  | 0  | 0 |
| 5  | 7  | 0 |
| 0  | 2  | 0 |
| 1  | 1  | 0 |
| 12 | 12 | 0 |
| 7  | 8  | 0 |
| 0  | 1  | 0 |
| 0  | 2  | 0 |
| 20 | 17 | 0 |
| 3  | 8  | 0 |
| 8  | 19 | 0 |
| 1  | 0  | 0 |
| 1  | 1  | 0 |
| 2  | 1  | 0 |
| 2  | 2  | 0 |
| 3  | 4  | 0 |
| 7  | 9  | 0 |
| 2  | 0  | 0 |
| 0  | 4  | 0 |
| 0  | 2  | 0 |
| 1  | 2  | 0 |
| 3  | 5  | 0 |
| 9  | 10 | 0 |
| 3  | 2  | 0 |
| 2  | 0  | 0 |
| 3  | 1  | 0 |
| 0  | 0  | 0 |
| 2  | 1  | 0 |
| 0  | 2  | 0 |
| 2  | 0  | 0 |
| 4  | 0  | 0 |
| 2  | 0  | 0 |
| 6  | 5  | 0 |
| 7  | 6  | 0 |
| 3  | 2  | 0 |
| 0  | 0  | 0 |
| 3  | 9  | 0 |
| 5  | 7  | 0 |
| 4  | 6  | 0 |
| 1  | 3  | 0 |
| 0  | 2  | 0 |
| 2  | 3  | 0 |
| 1  | 2  | 0 |
| 1  | 2  | 0 |

|    |    |   |
|----|----|---|
| 2  | 3  | 0 |
| 0  | 1  | 0 |
| 2  | 5  | 0 |
| 2  | 3  | 0 |
| 2  | 2  | 0 |
| 1  | 1  | 0 |
| 1  | 2  | 0 |
| 8  | 11 | 0 |
| 3  | 4  | 0 |
| 2  | 2  | 0 |
| 1  | 2  | 0 |
| 1  | 4  | 0 |
| 2  | 2  | 0 |
| 1  | 1  | 0 |
| 6  | 0  | 0 |
| 0  | 2  | 0 |
| 2  | 0  | 0 |
| 1  | 1  | 0 |
| 4  | 3  | 0 |
| 1  | 2  | 0 |
| 2  | 1  | 0 |
| 1  | 5  | 0 |
| 2  | 2  | 0 |
| 0  | 3  | 0 |
| 9  | 6  | 0 |
| 1  | 2  | 0 |
| 2  | 0  | 0 |
| 0  | 1  | 0 |
| 1  | 3  | 0 |
| 0  | 2  | 0 |
| 17 | 22 | 0 |
| 2  | 1  | 0 |
| 3  | 6  | 0 |
| 2  | 1  | 0 |
| 0  | 6  | 0 |
| 5  | 8  | 0 |
| 0  | 2  | 0 |
| 10 | 14 | 0 |
| 3  | 6  | 0 |
| 3  | 4  | 0 |
| 8  | 10 | 0 |
| 23 | 26 | 0 |
| 0  | 2  | 0 |
| 2  | 0  | 0 |
| 3  | 3  | 0 |
| 1  | 2  | 0 |
| 1  | 4  | 0 |
| 3  | 4  | 0 |
| 2  | 0  | 0 |
| 1  | 0  | 0 |
| 3  | 2  | 0 |
| 0  | 2  | 0 |
| 3  | 5  | 0 |
| 4  | 1  | 0 |
| 0  | 2  | 0 |
| 1  | 1  | 0 |
| 7  | 6  | 0 |
| 0  | 2  | 0 |
| 2  | 4  | 0 |

|    |    |   |
|----|----|---|
| 20 | 23 | 0 |
| 1  | 1  | 0 |
| 1  | 2  | 0 |
| 0  | 2  | 0 |
| 1  | 2  | 0 |
| 1  | 2  | 0 |
| 2  | 2  | 0 |
| 3  | 2  | 0 |
| 2  | 3  | 0 |
| 1  | 4  | 0 |
| 4  | 5  | 0 |
| 1  | 0  | 0 |
| 0  | 2  | 0 |
| 13 | 17 | 0 |
| 5  | 5  | 0 |
| 1  | 1  | 0 |
| 16 | 23 | 0 |
| 6  | 6  | 0 |
| 3  | 3  | 0 |
| 4  | 3  | 0 |
| 4  | 6  | 0 |
| 1  | 2  | 0 |
| 0  | 0  | 0 |
| 4  | 4  | 0 |
| 5  | 8  | 0 |
| 2  | 3  | 0 |
| 0  | 0  | 0 |
| 7  | 7  | 0 |
| 8  | 3  | 0 |
| 2  | 2  | 0 |
| 61 | 69 | 0 |
| 5  | 5  | 0 |
| 8  | 11 | 0 |
| 5  | 5  | 0 |
| 4  | 8  | 0 |
| 1  | 2  | 0 |
| 4  | 5  | 0 |
| 5  | 7  | 0 |
| 0  | 1  | 0 |
| 4  | 3  | 0 |
| 2  | 0  | 0 |
| 1  | 4  | 0 |
| 2  | 3  | 0 |
| 0  | 3  | 0 |
| 0  | 2  | 0 |
| 0  | 3  | 0 |
| 4  | 5  | 0 |
| 5  | 6  | 0 |
| 10 | 21 | 0 |
| 13 | 13 | 0 |
| 2  | 2  | 0 |
| 1  | 5  | 0 |
| 2  | 3  | 0 |
| 3  | 5  | 0 |
| 17 | 13 | 0 |
| 9  | 10 | 0 |
| 1  | 2  | 0 |
| 2  | 1  | 0 |
| 4  | 0  | 0 |

|    |    |   |
|----|----|---|
| 3  | 3  | 0 |
| 1  | 2  | 0 |
| 2  | 4  | 0 |
| 0  | 1  | 0 |
| 5  | 5  | 0 |
| 1  | 2  | 0 |
| 5  | 7  | 0 |
| 2  | 1  | 0 |
| 0  | 1  | 0 |
| 1  | 2  | 0 |
| 4  | 6  | 0 |
| 0  | 3  | 0 |
| 6  | 7  | 0 |
| 11 | 15 | 0 |
| 5  | 4  | 0 |
| 4  | 5  | 0 |
| 1  | 2  | 0 |
| 2  | 0  | 0 |
| 2  | 1  | 0 |
| 15 | 18 | 0 |
| 2  | 2  | 0 |
| 4  | 4  | 0 |
| 1  | 0  | 0 |
| 10 | 13 | 0 |
| 5  | 5  | 0 |
| 1  | 2  | 0 |
| 4  | 4  | 0 |
| 1  | 1  | 0 |
| 0  | 8  | 0 |
| 0  | 0  | 0 |
| 7  | 0  | 0 |
| 1  | 2  | 0 |
| 5  | 7  | 0 |
| 0  | 1  | 0 |
| 3  | 0  | 0 |
| 2  | 0  | 0 |
| 0  | 2  | 0 |
| 0  | 0  | 0 |
| 9  | 10 | 0 |
| 3  | 0  | 0 |
| 2  | 0  | 0 |
| 0  | 8  | 0 |
| 6  | 1  | 0 |
| 2  | 0  | 0 |
| 1  | 1  | 0 |
| 0  | 3  | 0 |
| 9  | 9  | 0 |
| 1  | 1  | 0 |
| 0  | 4  | 0 |
| 2  | 2  | 0 |
| 0  | 14 | 0 |
| 14 | 18 | 0 |
| 8  | 9  | 0 |
| 5  | 7  | 0 |
| 2  | 3  | 0 |
| 2  | 5  | 0 |
| 7  | 11 | 0 |
| 1  | 1  | 0 |
| 3  | 4  | 0 |



|    |    |   |
|----|----|---|
| 7  | 10 | 0 |
| 4  | 5  | 0 |
| 3  | 3  | 0 |
| 1  | 1  | 0 |
| 3  | 4  | 0 |
| 3  | 5  | 0 |
| 0  | 2  | 0 |
| 12 | 16 | 0 |
| 8  | 10 | 0 |
| 13 | 11 | 0 |
| 11 | 9  | 0 |
| 11 | 10 | 0 |
| 24 | 27 | 0 |
| 3  | 2  | 0 |
| 7  | 2  | 0 |
| 3  | 3  | 0 |
| 4  | 0  | 0 |
| 0  | 11 | 0 |
| 5  | 2  | 0 |
| 0  | 2  | 0 |
| 8  | 7  | 0 |
| 2  | 0  | 0 |
| 0  | 2  | 0 |
| 1  | 3  | 0 |
| 2  | 4  | 0 |
| 10 | 11 | 0 |
| 12 | 11 | 0 |
| 6  | 8  | 0 |
| 4  | 5  | 0 |
| 7  | 9  | 0 |
| 1  | 1  | 0 |
| 2  | 1  | 0 |
| 3  | 4  | 0 |
| 11 | 9  | 0 |
| 2  | 0  | 0 |
| 2  | 3  | 0 |
| 3  | 4  | 0 |
| 2  | 0  | 0 |
| 0  | 3  | 0 |
| 3  | 1  | 0 |
| 5  | 8  | 0 |
| 1  | 3  | 0 |
| 8  | 7  | 0 |
| 1  | 0  | 0 |
| 0  | 0  | 0 |
| 5  | 3  | 0 |
| 2  | 2  | 0 |
| 6  | 6  | 0 |
| 4  | 5  | 0 |
| 3  | 2  | 0 |
| 1  | 2  | 0 |
| 2  | 2  | 0 |
| 0  | 0  | 0 |
| 2  | 3  | 0 |
| 0  | 0  | 0 |
| 2  | 4  | 0 |
| 5  | 4  | 0 |
| 1  | 2  | 0 |
| 2  | 3  | 0 |

|    |    |   |
|----|----|---|
| 14 | 16 | 0 |
| 5  | 7  | 0 |
| 1  | 3  | 0 |
| 2  | 6  | 0 |
| 1  | 3  | 0 |
| 4  | 4  | 0 |
| 16 | 15 | 0 |
| 0  | 1  | 0 |
| 7  | 9  | 0 |
| 1  | 1  | 0 |
| 4  | 3  | 0 |
| 2  | 3  | 0 |
| 2  | 3  | 0 |
| 3  | 3  | 0 |
| 3  | 0  | 0 |
| 3  | 0  | 0 |
| 1  | 3  | 0 |
| 4  | 5  | 0 |
| 1  | 2  | 0 |
| 5  | 7  | 0 |
| 2  | 0  | 0 |
| 0  | 2  | 0 |
| 1  | 2  | 0 |
| 3  | 6  | 0 |
| 2  | 2  | 0 |
| 0  | 0  | 0 |
| 0  | 2  | 0 |
| 1  | 0  | 0 |
| 0  | 1  | 0 |
| 5  | 5  | 0 |
| 1  | 4  | 0 |
| 7  | 8  | 0 |
| 4  | 0  | 0 |
| 0  | 3  | 0 |
| 1  | 0  | 0 |
| 0  | 2  | 0 |
| 6  | 8  | 0 |
| 1  | 0  | 0 |
| 2  | 1  | 0 |
| 4  | 2  | 0 |
| 1  | 3  | 0 |
| 2  | 0  | 0 |
| 7  | 9  | 0 |
| 1  | 2  | 0 |
| 0  | 1  | 0 |
| 0  | 2  | 0 |
| 1  | 1  | 0 |
| 5  | 5  | 0 |
| 3  | 3  | 0 |
| 2  | 5  | 0 |
| 4  | 4  | 0 |
| 4  | 5  | 0 |
| 6  | 8  | 0 |
| 0  | 2  | 0 |
| 2  | 1  | 0 |
| 3  | 3  | 0 |
| 0  | 2  | 0 |
| 0  | 0  | 0 |
| 0  | 0  | 0 |

|    |    |   |
|----|----|---|
| 9  | 8  | 0 |
| 1  | 2  | 0 |
| 1  | 3  | 0 |
| 2  | 2  | 0 |
| 2  | 0  | 0 |
| 4  | 3  | 0 |
| 1  | 3  | 0 |
| 1  | 2  | 0 |
| 4  | 3  | 0 |
| 0  | 1  | 0 |
| 1  | 4  | 0 |
| 5  | 5  | 0 |
| 3  | 1  | 0 |
| 0  | 2  | 0 |
| 4  | 2  | 0 |
| 12 | 16 | 0 |
| 1  | 2  | 0 |
| 0  | 4  | 0 |
| 12 | 16 | 0 |
| 4  | 3  | 0 |
| 11 | 10 | 0 |
| 3  | 4  | 0 |
| 15 | 16 | 0 |
| 2  | 3  | 0 |
| 2  | 1  | 0 |
| 6  | 3  | 0 |
| 5  | 6  | 0 |
| 0  | 1  | 0 |
| 0  | 2  | 0 |
| 26 | 24 | 0 |
| 0  | 2  | 0 |
| 0  | 1  | 0 |
| 8  | 14 | 0 |
| 0  | 2  | 0 |
| 2  | 1  | 0 |
| 2  | 3  | 0 |
| 2  | 2  | 0 |
| 4  | 5  | 0 |
| 2  | 2  | 0 |
| 2  | 5  | 0 |
| 10 | 8  | 0 |
| 3  | 4  | 0 |
| 11 | 9  | 0 |
| 3  | 6  | 0 |
| 0  | 1  | 0 |
| 3  | 3  | 0 |
| 1  | 2  | 0 |
| 9  | 5  | 0 |
| 1  | 2  | 0 |
| 2  | 2  | 0 |
| 2  | 2  | 0 |
| 1  | 2  | 0 |
| 5  | 7  | 0 |
| 2  | 3  | 0 |
| 3  | 1  | 0 |
| 3  | 4  | 0 |
| 2  | 5  | 0 |
| 1  | 3  | 0 |
| 1  | 2  | 0 |

|    |    |   |
|----|----|---|
| 2  | 0  | 0 |
| 0  | 2  | 0 |
| 4  | 2  | 0 |
| 1  | 1  | 0 |
| 3  | 2  | 0 |
| 0  | 2  | 0 |
| 3  | 1  | 0 |
| 1  | 1  | 0 |
| 3  | 6  | 0 |
| 12 | 12 | 0 |
| 0  | 2  | 0 |
| 7  | 6  | 0 |
| 7  | 11 | 0 |
| 10 | 14 | 0 |
| 2  | 0  | 0 |
| 3  | 1  | 0 |
| 4  | 5  | 0 |
| 2  | 3  | 0 |
| 14 | 14 | 0 |
| 18 | 18 | 0 |
| 2  | 1  | 0 |
| 4  | 3  | 0 |
| 2  | 1  | 0 |
| 5  | 7  | 0 |
| 1  | 3  | 0 |
| 3  | 4  | 0 |
| 2  | 0  | 0 |
| 23 | 30 | 0 |
| 1  | 2  | 0 |
| 5  | 3  | 0 |
| 6  | 6  | 0 |
| 2  | 2  | 0 |
| 11 | 16 | 0 |
| 11 | 12 | 0 |
| 10 | 11 | 0 |
| 0  | 0  | 0 |
| 1  | 2  | 0 |
| 1  | 0  | 0 |
| 2  | 4  | 0 |
| 1  | 1  | 0 |
| 2  | 5  | 0 |
| 0  | 7  | 0 |
| 17 | 18 | 0 |
| 4  | 5  | 0 |
| 3  | 2  | 0 |
| 0  | 1  | 0 |
| 3  | 0  | 0 |
| 10 | 13 | 0 |
| 2  | 5  | 0 |
| 0  | 2  | 0 |
| 0  | 1  | 0 |
| 2  | 3  | 0 |
| 0  | 2  | 0 |
| 2  | 1  | 0 |
| 0  | 0  | 0 |
| 1  | 1  | 0 |
| 3  | 3  | 0 |
| 1  | 1  | 0 |
| 2  | 1  | 0 |

|    |    |   |
|----|----|---|
| 3  | 4  | 0 |
| 4  | 3  | 0 |
| 0  | 1  | 0 |
| 0  | 0  | 0 |
| 3  | 2  | 0 |
| 2  | 1  | 0 |
| 2  | 3  | 0 |
| 5  | 2  | 0 |
| 4  | 3  | 0 |
| 1  | 2  | 0 |
| 1  | 2  | 0 |
| 1  | 1  | 0 |
| 1  | 1  | 0 |
| 0  | 2  | 0 |
| 0  | 2  | 0 |
| 2  | 7  | 0 |
| 0  | 2  | 0 |
| 0  | 2  | 0 |
| 1  | 2  | 0 |
| 2  | 1  | 0 |
| 2  | 1  | 0 |
| 1  | 0  | 0 |
| 0  | 5  | 0 |
| 2  | 3  | 0 |
| 1  | 3  | 0 |
| 9  | 13 | 0 |
| 3  | 3  | 0 |
| 3  | 9  | 0 |
| 10 | 11 | 0 |
| 4  | 2  | 0 |
| 19 | 29 | 0 |
| 0  | 29 | 0 |
| 4  | 4  | 0 |
| 5  | 6  | 0 |
| 2  | 5  | 0 |
| 5  | 4  | 0 |
| 15 | 16 | 0 |
| 1  | 0  | 0 |
| 2  | 1  | 0 |
| 12 | 13 | 0 |
| 0  | 2  | 0 |
| 3  | 4  | 0 |
| 0  | 19 | 0 |
| 2  | 5  | 0 |
| 0  | 0  | 0 |
| 1  | 1  | 0 |
| 0  | 4  | 0 |
| 2  | 0  | 0 |
| 0  | 2  | 0 |
| 2  | 0  | 0 |
| 6  | 6  | 0 |
| 1  | 1  | 0 |
| 4  | 7  | 0 |
| 0  | 0  | 0 |
| 0  | 2  | 0 |
| 1  | 3  | 0 |
| 5  | 0  | 0 |
| 0  | 1  | 0 |
| 1  | 0  | 0 |

|    |    |   |
|----|----|---|
| 0  | 3  | 0 |
| 10 | 12 | 0 |
| 1  | 3  | 0 |
| 5  | 8  | 0 |
| 0  | 1  | 0 |
| 0  | 2  | 0 |
| 0  | 3  | 0 |
| 1  | 2  | 0 |
| 0  | 2  | 0 |
| 0  | 1  | 0 |
| 1  | 0  | 0 |
| 4  | 0  | 0 |
| 3  | 4  | 0 |
| 2  | 0  | 0 |
| 0  | 1  | 0 |
| 4  | 4  | 0 |
| 2  | 1  | 0 |
| 2  | 8  | 0 |
| 3  | 3  | 0 |
| 1  | 1  | 0 |
| 2  | 1  | 0 |
| 2  | 2  | 0 |
| 2  | 2  | 0 |
| 1  | 2  | 0 |
| 2  | 4  | 0 |
| 2  | 3  | 0 |
| 3  | 3  | 0 |
| 2  | 0  | 0 |
| 2  | 3  | 0 |
| 3  | 2  | 0 |
| 2  | 3  | 0 |
| 1  | 1  | 0 |
| 3  | 2  | 0 |
| 0  | 5  | 0 |
| 1  | 0  | 0 |
| 0  | 2  | 0 |
| 1  | 0  | 0 |
| 4  | 4  | 0 |
| 5  | 6  | 0 |
| 4  | 4  | 0 |
| 7  | 4  | 0 |
| 4  | 5  | 0 |
| 2  | 2  | 0 |
| 2  | 0  | 0 |
| 2  | 0  | 0 |
| 3  | 1  | 0 |
| 3  | 1  | 0 |
| 5  | 3  | 0 |
| 12 | 15 | 0 |
| 11 | 12 | 0 |
| 9  | 9  | 0 |
| 1  | 3  | 0 |
| 1  | 2  | 0 |
| 3  | 1  | 0 |
| 2  | 2  | 0 |
| 0  | 2  | 0 |
| 1  | 1  | 0 |
| 0  | 1  | 0 |
| 6  | 6  | 0 |

|    |    |   |
|----|----|---|
| 3  | 3  | 0 |
| 2  | 3  | 0 |
| 0  | 1  | 0 |
| 2  | 0  | 0 |
| 0  | 2  | 0 |
| 1  | 2  | 0 |
| 1  | 2  | 0 |
| 1  | 3  | 0 |
| 2  | 2  | 0 |
| 0  | 2  | 0 |
| 3  | 0  | 0 |
| 2  | 2  | 0 |
| 2  | 2  | 0 |
| 13 | 16 | 0 |
| 2  | 2  | 0 |
| 3  | 7  | 0 |
| 1  | 2  | 0 |
| 6  | 7  | 0 |
| 6  | 11 | 0 |
| 0  | 2  | 0 |
| 0  | 2  | 0 |
| 2  | 2  | 0 |
| 1  | 2  | 0 |
| 2  | 1  | 0 |
| 2  | 1  | 0 |
| 1  | 2  | 0 |
| 4  | 5  | 0 |
| 0  | 0  | 0 |
| 1  | 5  | 0 |
| 8  | 9  | 0 |
| 1  | 2  | 0 |
| 8  | 10 | 0 |
| 1  | 0  | 0 |
| 0  | 0  | 0 |
| 16 | 25 | 0 |
| 6  | 17 | 0 |
| 0  | 2  | 0 |
| 0  | 0  | 0 |
| 0  | 2  | 0 |
| 5  | 8  | 0 |
| 3  | 4  | 0 |
| 5  | 10 | 0 |
| 3  | 2  | 0 |
| 2  | 0  | 0 |
| 3  | 3  | 0 |
| 7  | 13 | 0 |
| 1  | 1  | 0 |
| 3  | 3  | 0 |
| 1  | 3  | 0 |
| 12 | 13 | 0 |
| 4  | 4  | 0 |
| 2  | 2  | 0 |
| 8  | 7  | 0 |
| 3  | 3  | 0 |
| 1  | 1  | 0 |
| 9  | 4  | 0 |
| 2  | 2  | 0 |
| 0  | 1  | 0 |
| 0  | 2  | 0 |

|    |    |   |
|----|----|---|
| 0  | 1  | 0 |
| 0  | 1  | 0 |
| 0  | 2  | 0 |
| 11 | 15 | 0 |
| 11 | 10 | 0 |
| 12 | 14 | 0 |
| 2  | 2  | 0 |
| 1  | 2  | 0 |
| 2  | 5  | 0 |
| 12 | 11 | 0 |
| 8  | 9  | 0 |
| 2  | 2  | 0 |
| 3  | 4  | 0 |
| 1  | 0  | 0 |
| 1  | 2  | 0 |
| 2  | 0  | 0 |
| 1  | 0  | 0 |
| 0  | 2  | 0 |
| 4  | 2  | 0 |
| 1  | 0  | 0 |
| 2  | 0  | 0 |
| 13 | 15 | 0 |
| 8  | 9  | 0 |
| 2  | 4  | 0 |
| 3  | 3  | 0 |
| 1  | 0  | 0 |
| 1  | 2  | 0 |
| 0  | 2  | 0 |
| 1  | 2  | 0 |
| 2  | 0  | 0 |
| 15 | 16 | 0 |
| 3  | 4  | 0 |
| 19 | 25 | 0 |
| 4  | 6  | 0 |
| 2  | 1  | 0 |
| 1  | 1  | 0 |
| 4  | 4  | 0 |
| 1  | 3  | 0 |
| 2  | 2  | 0 |
| 7  | 0  | 0 |
| 1  | 2  | 0 |
| 3  | 9  | 0 |
| 2  | 2  | 0 |
| 2  | 3  | 0 |
| 2  | 2  | 0 |
| 2  | 0  | 0 |
| 0  | 2  | 0 |
| 0  | 1  | 0 |
| 0  | 0  | 0 |
| 7  | 4  | 0 |
| 1  | 1  | 0 |
| 1  | 3  | 0 |
| 6  | 4  | 0 |
| 1  | 3  | 0 |
| 0  | 0  | 0 |
| 0  | 3  | 0 |
| 2  | 3  | 0 |
| 3  | 3  | 0 |
| 16 | 22 | 0 |



|    |    |   |
|----|----|---|
| 7  | 13 | 0 |
| 0  | 3  | 0 |
| 2  | 2  | 0 |
| 3  | 4  | 0 |
| 18 | 23 | 0 |
| 3  | 2  | 0 |
| 4  | 3  | 0 |
| 2  | 0  | 0 |
| 3  | 2  | 0 |
| 10 | 12 | 0 |
| 2  | 1  | 0 |
| 3  | 2  | 0 |
| 2  | 5  | 0 |
| 9  | 12 | 0 |
| 2  | 3  | 0 |
| 2  | 0  | 0 |
| 1  | 2  | 0 |
| 3  | 5  | 0 |
| 0  | 1  | 0 |
| 2  | 0  | 0 |
| 7  | 7  | 0 |
| 3  | 1  | 0 |
| 2  | 3  | 0 |
| 4  | 6  | 0 |
| 1  | 3  | 0 |

| IPI                                                                                             | SwissProt |
|-------------------------------------------------------------------------------------------------|-----------|
| IPI00797738                                                                                     |           |
| IPI00647593                                                                                     |           |
| IPI00375127                                                                                     |           |
| IPI00479366                                                                                     |           |
| IPI00738677                                                                                     |           |
| IPI00783641                                                                                     |           |
| IPI00472879                                                                                     | Q5SYT8    |
| IPI00382617                                                                                     | P07029,   |
| IPI00164951,IPI00298454,IPI00477094,IPI00477666,IPI00479567,IPI00479700,IPI00749461,IPI00784621 |           |
| IPI00789847                                                                                     |           |
| IPI00027442,IPI00784131                                                                         | P49588,   |
| IPI00303207                                                                                     | P61221,   |
| IPI00291419                                                                                     | Q9BWD1,   |
| IPI00021290                                                                                     | P53396,   |
| IPI00395469                                                                                     | O00154,   |
| IPI00219861                                                                                     | P24666,   |
| IPI00021428                                                                                     | P68133,   |
| IPI00021439                                                                                     | P60709,   |
| IPI00013508                                                                                     | P12814,   |
| IPI00013808                                                                                     | O43707,   |
| IPI00470573                                                                                     | P61160,   |
| IPI00028091                                                                                     | P61158,   |
| IPI00013897                                                                                     | O14672,   |
| IPI00288894                                                                                     | P78536,   |
| IPI00011901,IPI00249735                                                                         | Q9H013,   |
| IPI00440932,IPI00747759                                                                         | Q13443,   |
| IPI00036578                                                                                     | P58397,   |
| IPI00152639                                                                                     | Q8TE59,   |
| IPI00157513                                                                                     | Q8N6G6    |
| IPI00746777                                                                                     | P11766,   |
| IPI00651738                                                                                     | Q9BV57,   |
| IPI00234368                                                                                     | P55263,   |
| IPI00026833                                                                                     | P30520,   |
| IPI00374563                                                                                     | O00468,   |
| IPI00012007                                                                                     | P23526,   |
| IPI00030706                                                                                     | O95433,   |
| IPI00215901,IPI00218988                                                                         | P54819,   |
| IPI00220271                                                                                     | P14550,   |
| IPI00413641                                                                                     | P15121,   |
| IPI00029733                                                                                     | Q04828,   |
| IPI00022434,IPI00745872                                                                         | P02768,   |
| IPI00015102,IPI00783803,IPI00795504,IPI00807403                                                 | Q13740,   |
| IPI00218914                                                                                     | P00352,   |
| IPI00296183,IPI00654709,IPI00796116                                                             | P30838,   |
| IPI00465439                                                                                     | P04075,   |
| IPI00418262                                                                                     | P09972,   |
| IPI00025849,IPI00449263                                                                         | P39687,   |
| IPI00007423,IPI00759824                                                                         | Q92688,   |
| IPI00418169,IPI00455315                                                                         | P07355,   |
| IPI00329801                                                                                     | P08758,   |
| IPI00337741                                                                                     | P13798,   |
| IPI00215911                                                                                     | P27695,   |
| IPI00031030                                                                                     | Q06481,   |
| IPI00168479                                                                                     | Q8NCW5    |
| IPI00006608,IPI00412681                                                                         | P05067,   |

|                                                                                     |                |
|-------------------------------------------------------------------------------------|----------------|
| IPI00218693                                                                         | P07741,        |
| IPI00215914,IPI00215917                                                             | P61204,P84077, |
| IPI00797560                                                                         | P52565         |
| IPI00165949,IPI00477831                                                             | Q9NZ08,        |
| IPI00289499                                                                         | P31939,        |
| IPI00006482                                                                         | P05023,        |
| IPI00003021,IPI00302840,IPI00640401,IPI00788782                                     | P13637,P50993, |
| IPI00008167                                                                         | P54709,        |
| IPI00020430,IPI00784119,IPI00794988                                                 | Q15904,        |
| IPI00168884                                                                         | O75787,        |
| IPI00007812                                                                         | P21281,        |
| IPI00641829                                                                         | Q13838,        |
| IPI00166729                                                                         | P25311,        |
| IPI00004656,IPI00796379                                                             | P61769,        |
| IPI00304331,IPI00477470                                                             | O94766,        |
| IPI00009997                                                                         | O43505,        |
| IPI00215767                                                                         | P15291,        |
| IPI00030128                                                                         | O60513,        |
| IPI00068254                                                                         | Q9P287,        |
| IPI00413587,IPI00420084                                                             | P55957,        |
| IPI00219575                                                                         | Q13867,        |
| IPI00301434                                                                         | Q9H3K6,        |
| IPI00795150                                                                         | P35613         |
| IPI00419473                                                                         | P20290,        |
| IPI00013468,IPI00514701,IPI00644108                                                 | O43684,        |
| IPI00003419                                                                         | O00193         |
| IPI00006980,IPI00792100                                                             | Q9Y224,        |
| IPI00056357                                                                         | Q969H8,        |
| IPI00014230                                                                         | Q07021,        |
| IPI00296165                                                                         | P00736,        |
| IPI00009659                                                                         | Q9NQG5,        |
| IPI00550689                                                                         | Q9Y3I0,        |
| IPI00022381                                                                         | Q6UXA7,        |
| IPI00295105                                                                         | P23280,        |
| IPI00395627,IPI00552308,IPI00745851                                                 | Q9HB71,        |
| IPI00301263                                                                         | P27708,        |
| IPI00003813,IPI00166392                                                             | Q9BY67         |
| IPI00075248,IPI00386621,IPI00794543                                                 | P62158,        |
| IPI00020599                                                                         | P27797,        |
| IPI00014537,IPI00789155                                                             | O43852,        |
| IPI00103175                                                                         | Q8WVQ1,        |
| IPI00020984                                                                         | P27824,        |
| IPI00008274                                                                         | Q01518,        |
| IPI00005969                                                                         | P52907,        |
| IPI00218782,IPI00642256                                                             | P47756,        |
| IPI00304409                                                                         | Q9Y2V2,        |
| IPI00027443,IPI00158625,IPI00556365,IPI00556541                                     | P49589,        |
| IPI00220857,IPI00305750,IPI00760715,IPI00761035,IPI00761069,IPI00761140,IPI00761160 | P20810         |
| IPI00016746,IPI00024871                                                             | Q13951,        |
| IPI00295386                                                                         | P16152,        |
| IPI00010320                                                                         | P83916,        |
| IPI00297579                                                                         | Q13185,        |
| IPI00297779                                                                         | P78371,        |
| IPI00290770,IPI00553185,IPI00744315                                                 | P49368,        |
| IPI00302927                                                                         | P50991,        |
| IPI00010720                                                                         | P48643,        |
| IPI00027626                                                                         | P40227,        |
| IPI00018465                                                                         | Q99832,        |
| IPI00302925,IPI00784090                                                             | P50990,        |

|                                                                                                   |         |
|---------------------------------------------------------------------------------------------------|---------|
| IPI00410488,IPI00441094,IPI00719044,IPI00793688                                                   | Q5ZPR3, |
| IPI00297160,IPI00305064,IPI00418465,IPI00419219,IPI00827650,IPI00827658,IPI00827795,IPI00827893,I | P16070, |
| IPI00219853,IPI00374176,IPI00374177,IPI00398353,IPI00456644                                       | P15529, |
| IPI00000190                                                                                       | P60033, |
| IPI00215997,IPI00657796,IPI00795937                                                               | P21926, |
| IPI00025861,IPI00744889                                                                           | P12830, |
| IPI00290085                                                                                       | P19022, |
| IPI00645614,IPI00747243                                                                           | P22223  |
| IPI00014197,IPI00787933                                                                           | Q9UKY7  |
| IPI00607801                                                                                       | P23141, |
| IPI00007306                                                                                       | Q9UEE9, |
| IPI00012011                                                                                       | P23528, |
| IPI00006601                                                                                       | P05060, |
| IPI00301185,IPI00306719                                                                           | Q9BWS9  |
| IPI00299059                                                                                       | O00533, |
| IPI00015897                                                                                       | Q6IN49  |
| IPI00478414,IPI00654588                                                                           | Q9BU40, |
| IPI00025333,IPI00387130                                                                           | Q6FI81, |
| IPI00180954,IPI00641579,IPI00646241                                                               | Q14011, |
| IPI00022977                                                                                       | P12277, |
| IPI00010896                                                                                       | O00299, |
| IPI00001960                                                                                       | Q9Y696, |
| IPI00291930,IPI00397519                                                                           | Q14677, |
| IPI00007257                                                                                       | O94985  |
| IPI00396423,IPI00747063                                                                           | Q9BQT9, |
| IPI00024067,IPI00455383                                                                           | Q00610, |
| IPI00219953                                                                                       | P30085, |
| IPI00430813,IPI00430814                                                                           | P62633, |
| IPI00165579,IPI00177728,IPI00646632                                                               | Q96KP4, |
| IPI00015262                                                                                       | Q99439, |
| IPI00216682                                                                                       | Q15417, |
| IPI00029751                                                                                       | Q12860, |
| IPI00012386                                                                                       | O43405, |
| IPI00828195                                                                                       | P39060  |
| IPI00291136                                                                                       | P12109, |
| IPI00295851                                                                                       | P53618, |
| IPI00008453                                                                                       | Q9ULV4, |
| IPI00031121                                                                                       | P16870, |
| IPI00640372                                                                                       | Q99829  |
| IPI00550308                                                                                       | Q9NTZ6, |
| IPI00024403                                                                                       | O75131, |
| IPI00012998,IPI00030654                                                                           | Q16630, |
| IPI00027397                                                                                       | Q9H910, |
| IPI00305469                                                                                       | P46108, |
| IPI00004839                                                                                       | P46109, |
| IPI00022744                                                                                       | P55060, |
| IPI00442073                                                                                       | P21291, |
| IPI00305477                                                                                       | P01037, |
| IPI00032293                                                                                       | P01034, |
| IPI00021828                                                                                       | P04080, |
| IPI00013256,IPI00607841,IPI00744127                                                               | P33240, |
| IPI00215948                                                                                       | P35221, |
| IPI00787237                                                                                       | P35222, |
| IPI00182469,IPI00219725,IPI00219728,IPI00219730,IPI00219732,IPI00219734,IPI00219738,IPI00219739,I | O60716, |
| IPI00290142                                                                                       | P17812, |
| IPI00645702                                                                                       | Q9NRF8, |
| IPI00022810                                                                                       | P53634, |
| IPI00011229                                                                                       | P07339, |
| IPI00002745                                                                                       | Q9UBR2, |

|                                                                                     |                |
|-------------------------------------------------------------------------------------|----------------|
| IPI00029601,IPI00062884                                                             | Q14247,        |
| IPI00014312                                                                         | Q13618,        |
| IPI00034319,IPI00554556,IPI00554634                                                 | O60888,        |
| IPI00396257                                                                         | O95715,        |
| IPI00465315                                                                         | P99999,        |
| IPI00644231,IPI00791837                                                             | Q7L576         |
| IPI00044326                                                                         | Q8NCHO,        |
| IPI00028911                                                                         | Q14118,        |
| IPI00010182,IPI00218836,IPI00815745                                                 | P07108         |
| IPI00003406,IPI00295624                                                             | Q16643,        |
| IPI00220503,IPI00793544                                                             | Q13561,        |
| IPI00786914                                                                         | Q16531,        |
| IPI00293867                                                                         | P30046,        |
| IPI00008943,IPI00019918                                                             | Q9NUU7,Q9UMR2, |
| IPI00644431                                                                         | O00148,        |
| IPI00215637                                                                         | O00571,        |
| IPI00010882                                                                         | O00273,        |
| IPI00396435                                                                         | O43143,        |
| IPI00742905                                                                         | Q08211         |
| IPI00003269                                                                         |                |
| IPI00398918                                                                         | Q68D85         |
| IPI00012535                                                                         | P31689,        |
| IPI00032406                                                                         | O60884,        |
| IPI00015947                                                                         | P25685,        |
| IPI00008454                                                                         | Q9UBS4,        |
| IPI00003438                                                                         | O75937,        |
| IPI00010348                                                                         | O00115,        |
| IPI00146935                                                                         | O00429,        |
| IPI00033022,IPI00181352,IPI00218889,IPI00477431,IPI00514550,IPI00743573,IPI00794575 | P50570,        |
| IPI00015856,IPI00029820,IPI00658188,IPI00658215                                     | Q9ULA0,        |
| IPI00029111                                                                         | Q14195         |
| IPI00025846,IPI00220146                                                             | Q02487,        |
| IPI00028931                                                                         | Q14126,        |
| IPI00473014,IPI00643237                                                             | P60981,        |
| IPI00793322                                                                         | P33316,        |
| IPI00456969,IPI00477531                                                             | Q14204,        |
| IPI00019329                                                                         | P63167,        |
| IPI00396485                                                                         | P68104,        |
| IPI00178440                                                                         | P24534,        |
| IPI00642971                                                                         |                |
| IPI00000875,IPI00747497                                                             | P26641,        |
| IPI00186290                                                                         | P13639,        |
| IPI00003519                                                                         | Q15029,        |
| IPI00005578                                                                         | Q9H223,        |
| IPI00015077                                                                         | P41567,        |
| IPI00219678                                                                         | P05198,        |
| IPI00297982                                                                         | P41091,        |
| IPI00290461                                                                         | O75822,        |
| IPI00012795                                                                         | Q13347,        |
| IPI00647650                                                                         | O15372,        |
| IPI00290460                                                                         | O75821,        |
| IPI00465233                                                                         | Q9Y262         |
| IPI00025491                                                                         | P60842,        |
| IPI00012079,IPI00439415                                                             | P23588,        |
| IPI00783643,IPI00788723                                                             | P06730,        |
| IPI00022648                                                                         | P55010,        |
| IPI00376005,IPI00411704                                                             | P63241,        |
| IPI00299254                                                                         | O60841,        |
| IPI00301936                                                                         | Q15717,        |

|                                                                                                   |                |
|---------------------------------------------------------------------------------------------------|----------------|
| IPI00465248                                                                                       | P06733,        |
| IPI00156171,IPI00303210                                                                           | Q13822,        |
| IPI00220797,IPI00383552,IPI00410177,IPI00410178,IPI00410179,IPI00410180,IPI00410181,IPI00470835,I | O43768         |
| IPI00013452                                                                                       | P07814,        |
| IPI00029631                                                                                       | P84090,        |
| IPI00024911                                                                                       | P30040,        |
| IPI00411706                                                                                       | P10768,        |
| IPI00009841,IPI00065554                                                                           | Q01844,        |
| IPI00002732,IPI00790204                                                                           | Q9UBQ6,        |
| IPI00001754,IPI00069985,IPI00294993                                                               | Q9Y624,        |
| IPI00021923                                                                                       | Q92520,        |
| IPI00303318,IPI00789253                                                                           | Q9NUQ9,        |
| IPI00300074                                                                                       | Q9NSD9,        |
| IPI00645907                                                                                       | P49327         |
| IPI00296537                                                                                       | P23142,        |
| IPI00296534                                                                                       | P23142,        |
| IPI00465038                                                                                       | P98095         |
| IPI00032908                                                                                       | O95750,        |
| IPI00021399                                                                                       | Q14512,        |
| IPI00328245                                                                                       | P11362,        |
| IPI00296561                                                                                       | Q8N441,        |
| IPI00296053,IPI00759715                                                                           | P07954,        |
| IPI00413778                                                                                       | P62942,        |
| IPI00024157                                                                                       | Q00688,        |
| IPI00219005                                                                                       | Q02790,        |
| IPI00059292,IPI00219306                                                                           | P61326,Q96A72, |
| IPI00305010                                                                                       |                |
| IPI00002191                                                                                       |                |
| IPI00333541                                                                                       | P21333,        |
| IPI00470919                                                                                       | P02751         |
| IPI00022418                                                                                       | P02751,        |
| IPI00329327                                                                                       | Q86XX4,        |
| IPI00180707                                                                                       | Q5SZK8,        |
| IPI00163187,IPI00747810                                                                           | Q16658,        |
| IPI00008087                                                                                       | Q8N475,        |
| IPI00788671                                                                                       | Q96AE4         |
| IPI00012440                                                                                       | Q9BTY2,        |
| IPI00260715                                                                                       | P35637,        |
| IPI00646643                                                                                       | O75494         |
| IPI00012442                                                                                       | Q13283,        |
| IPI00009057                                                                                       | Q9UN86,        |
| IPI00216008,IPI00289800,IPI00760751                                                               | P11413,        |
| IPI00783446                                                                                       | P10253,        |
| IPI00298949                                                                                       | O14976,        |
| IPI00026637                                                                                       | P22466,        |
| IPI00375205                                                                                       | Q86SR1,        |
| IPI00004669                                                                                       | Q10471,        |
| IPI00026991                                                                                       | Q8NCL4,        |
| IPI00011454                                                                                       | Q14697,        |
| IPI00219018                                                                                       | P04406,        |
| IPI00465260                                                                                       | P41250,        |
| IPI00025273                                                                                       | P22102,        |
| IPI00021807,IPI00759616                                                                           | P04062,        |
| IPI00306543                                                                                       | Q99988,        |
| IPI00031461                                                                                       | P50395,        |
| IPI00023728                                                                                       | Q92820,        |
| IPI00024705                                                                                       | O14908,        |
| IPI00554793                                                                                       | Q99417,        |
| IPI00414717,IPI00641153                                                                           | Q92896,        |

|                                                                                                             |                     |
|-------------------------------------------------------------------------------------------------------------|---------------------|
| IPI00220766                                                                                                 | Q04760,             |
| IPI00018236                                                                                                 | P17900,             |
| IPI00029079                                                                                                 | P49915,             |
| IPI00026268                                                                                                 | P62873,             |
| IPI00641950                                                                                                 | P63244,             |
| IPI00009305                                                                                                 | P46926,             |
| IPI00759659,IPI00784293                                                                                     | Q8NBJ4,             |
| IPI00004962                                                                                                 | O00461              |
| IPI00031241,IPI00743931                                                                                     | Q9H8Y8,             |
| IPI00219029                                                                                                 | P17174,             |
| IPI00018206                                                                                                 | P00505,             |
| IPI00015688                                                                                                 | P35052,             |
| IPI00232571                                                                                                 | O75487,             |
| IPI00027497                                                                                                 | P06744,             |
| IPI00030910,IPI00639921                                                                                     | Q14444,             |
| IPI00397949,IPI00412420,IPI00783104                                                                         | Q9Y653,             |
| IPI00026199                                                                                                 | P22352,             |
| IPI00021327                                                                                                 | P62993,             |
| IPI00037448,IPI00550682                                                                                     | Q9UBQ7,             |
| IPI00026314                                                                                                 | P06396,             |
| IPI00218829                                                                                                 | P15170,             |
| IPI00016862                                                                                                 | P00390,             |
| IPI00010706                                                                                                 | P48637,             |
| IPI00219757                                                                                                 | P09211,             |
| IPI00290416                                                                                                 | Q9NTK5,             |
| IPI00021808                                                                                                 | P12081,             |
| IPI00410714                                                                                                 | P69905,             |
| IPI00217471,IPI00220706,IPI00473011,IPI00654755,IPI00657660,IPI00657911,IPI00784636,IPI00796636,IPI00740800 | P02042,P02100,P6887 |
| IPI00176610,IPI00741006                                                                                     | P18669, Q6FHU2      |
| IPI00514330                                                                                                 | P51858              |
| IPI00027851,IPI00829779                                                                                     | P06865,             |
| IPI00239077                                                                                                 | P49773,             |
| IPI00019894,IPI00021370,IPI00784038                                                                         | P61086              |
| IPI00453473                                                                                                 | P62805,             |
| IPI00339274                                                                                                 | Q16777,             |
| IPI00102864                                                                                                 | P52789,             |
| IPI00644631                                                                                                 | P01892,             |
| IPI00472112,IPI00472448                                                                                     | P13746,             |
| IPI00472284                                                                                                 | P30495,             |
| IPI00472035,IPI00745649                                                                                     | Q29960,             |
| IPI00789627                                                                                                 | A2ABE7              |
| IPI00795906                                                                                                 |                     |
| IPI00107380                                                                                                 |                     |
| IPI00004672                                                                                                 | P01893              |
| IPI00028160,IPI00219877                                                                                     | P08397              |
| IPI00419258,IPI00644653,IPI00645948,IPI00815806                                                             | P09429,             |
| IPI00219097                                                                                                 | P26583,             |
| IPI00217477,IPI00411540,IPI00640781,IPI00643317                                                             | O15347,             |
| IPI00384857                                                                                                 | Q9UK76,             |
| IPI00215965,IPI00465365,IPI00797148                                                                         | P09651,             |
| IPI00396378                                                                                                 | P22626,             |
| IPI00334713                                                                                                 | Q99729,             |
| IPI00216592                                                                                                 | P07910,             |
| IPI00011274,IPI00045498                                                                                     | O14979              |
| IPI00003881                                                                                                 | P52597,             |
| IPI00479191                                                                                                 | P31943,             |
| IPI00026230                                                                                                 | P55795,             |
| IPI00013877,IPI00216493                                                                                     | P31942,             |

|                                                 |         |
|-------------------------------------------------|---------|
| IPI00514561,IPI00807545                         | P61978  |
| IPI00027834,IPI00796199                         | P14866, |
| IPI00171903,IPI00383296                         | P52272, |
| IPI00012074,IPI00644055                         | O43390, |
| IPI00644079                                     | Q00839, |
| IPI00218493                                     | P00492, |
| IPI00304693,IPI00607616,IPI00736669             | P52594, |
| IPI00334775                                     | P08238  |
| IPI00027230                                     | P14625, |
| IPI00304925                                     | P08107, |
| IPI00002966                                     | P34932, |
| IPI00003362                                     | P11021, |
| IPI00003865                                     | P11142, |
| IPI00007765                                     | P38646, |
| IPI00472102                                     | P10809, |
| IPI00220362                                     | P61604, |
| IPI00796127                                     | Q92598, |
| IPI00218993,IPI00514983                         | Q92598, |
| IPI00003176                                     | Q92743, |
| IPI00168847,IPI00178140,IPI00654773             | Q12794, |
| IPI00000877                                     | Q9Y4L1, |
| IPI00644127                                     | P41252, |
| IPI00220373                                     | P14735, |
| IPI00027223                                     | O75874, |
| IPI00433029                                     | P05019, |
| IPI00297284                                     | P18065, |
| IPI00018305,IPI00556155                         | P17936, |
| IPI00029236                                     | P24593, |
| IPI00291987                                     | Q8WX77  |
| IPI00056478                                     | Q969P0, |
| IPI00020354,IPI00647552                         | P78552, |
| IPI00021382                                     | P27930, |
| IPI00005198                                     | Q12905, |
| IPI00298788,IPI00418313                         | Q12906, |
| IPI00006164                                     | Q9H0C8  |
| IPI00291510                                     | P12268, |
| IPI00007402,IPI00784008                         | O95373, |
| IPI00009342                                     | P46940, |
| IPI00031821                                     | Q9Y287, |
| IPI00099650                                     | P78504, |
| IPI00014238,IPI00307092                         | Q15046, |
| IPI00008575,IPI00082310,IPI00385834,IPI00479209 | Q07666, |
| IPI00479786                                     | Q92945  |
| IPI00012837                                     | P33176, |
| IPI00220142                                     | P21583, |
| IPI00002214                                     | P52292, |
| IPI00012578                                     | O00629, |
| IPI00001639                                     | Q14974, |
| IPI00140177,IPI00218929,IPI00651704             | Q96MU8, |
| IPI00220327                                     | P04264, |
| IPI00554788,IPI00784347                         | P05783, |
| IPI00479145                                     | P08727, |
| IPI00290857                                     | P12035, |
| IPI00554648                                     | P05787, |
| IPI00019359                                     | P35527, |
| IPI00641693                                     | O15230, |
| IPI00298281                                     | P11047, |
| IPI00009030,IPI00216172,IPI00739827             | P13473, |
| IPI00419237                                     | P28838, |



|                                     |         |
|-------------------------------------|---------|
| IPI00217966                         | P00338, |
| IPI00219217                         | P07195, |
| IPI00792252                         | P01130, |
| IPI00455739                         | Q8NES3, |
| IPI00219219                         | P09382, |
| IPI00465431                         | P17931, |
| IPI00023673                         | Q08380, |
| IPI00293303                         | Q99538, |
| IPI00009950                         | Q12907, |
| IPI00021405,IPI00216953             | P02545, |
| IPI00217975                         | P20700, |
| IPI00009771                         | Q03252, |
| IPI00399212,IPI00414127             | P43487, |
| IPI00456898                         |         |
| IPI00027378                         | Q04323, |
| IPI00740545                         |         |
| IPI00014263,IPI00220894             | Q15056, |
| IPI00007797                         | Q01469, |
| IPI00028109                         | Q9C005, |
| IPI00782994                         | Q9Y4K0, |
| IPI00183445,IPI00410210             | O94910, |
| IPI00170935                         | Q8N1G4, |
| IPI00328716                         | Q86UE6, |
| IPI00409640,IPI00409641,IPI00641640 | Q86X29, |
| IPI00219077,IPI00514090             | P09960  |
| IPI00073196,IPI00398794             | Q9NS15  |
| IPI00006932                         | Q9Y383, |
| IPI00303882                         | O60664, |
| IPI00432363,IPI00514468             | Q96PK2, |
| IPI00018042                         | P43358, |
| IPI00439446                         | P33908  |
| IPI00003802                         | Q16706, |
| IPI00008868                         | P46821, |
| IPI00219604                         | Q02750, |
| IPI00220113,IPI00396171,IPI00745518 | P27816, |
| IPI00003479                         | P28482, |
| IPI00017596                         | Q15691, |
| IPI00219301                         | P29966, |
| IPI00641181                         | P49006, |
| IPI00010157                         | P31153, |
| IPI00002324,IPI00181717             | Q9NZL9  |
| IPI00168520,IPI00473118,IPI00554542 | O00339, |
| IPI00005690                         | O15232, |
| IPI00789551                         | P43243  |
| IPI00013214                         | P25205, |
| IPI00018349                         | P33991, |
| IPI00031517                         | Q14566, |
| IPI00291005                         | P40925, |
| IPI00010333                         | P21741, |
| IPI00008215                         | P48163, |
| IPI00022621,IPI00644827             | P55001, |
| IPI00002236                         | Q08431, |
| IPI00020407                         | Q09328, |
| IPI00298618                         | Q8N9N8  |
| IPI00640150,IPI00647961             | Q29980  |
| IPI00293276                         | P14174, |
| IPI00293748                         | Q9UNW1, |
| IPI00004233                         | P46013, |
| IPI00023461,IPI00759546             | P55196, |

|                                                                                                 |         |
|-------------------------------------------------------------------------------------------------|---------|
| IPI00027780                                                                                     | P08253, |
| IPI00154975                                                                                     | Q8WXX5, |
| IPI00219365                                                                                     | P26038, |
| IPI00011876                                                                                     | Q13126, |
| IPI00218342,IPI00794900                                                                         | P11586, |
| IPI00179589                                                                                     | P58546, |
| IPI00019502                                                                                     | P35579, |
| IPI00335168,IPI00413922,IPI00744444,IPI00789605,IPI00795576,IPI00796366,IPI00797001,IPI00797626 | P60660, |
| IPI00023748,IPI00797126                                                                         | Q13765, |
| IPI00008787                                                                                     | P54802, |
| IPI00147874                                                                                     | Q9NR45, |
| IPI00023860,IPI00789029,IPI00791065,IPI00793389                                                 | P55209, |
| IPI00017763                                                                                     | Q99733, |
| IPI00032158,IPI00386189                                                                         | Q9BXJ9, |
| IPI00179953                                                                                     | P49321, |
| IPI00604620                                                                                     | P19338, |
| IPI00020008                                                                                     | Q15843, |
| IPI00023754                                                                                     | Q92832, |
| IPI00795624                                                                                     | Q99435  |
| IPI00217291                                                                                     | Q92859, |
| IPI00604590,IPI00795292                                                                         | P15531  |
| IPI00304596                                                                                     | Q15233, |
| IPI00465159                                                                                     |         |
| IPI00017672                                                                                     | P00491, |
| IPI00301579                                                                                     | P61916, |
| IPI00026216                                                                                     | P55786, |
| IPI00220740,IPI00549248                                                                         | P06748, |
| IPI00026946                                                                                     | P47972, |
| IPI00012069,IPI00619898,IPI00619966                                                             | P15559, |
| IPI00333776,IPI00655818                                                                         | Q92823, |
| IPI00300890,IPI00641131                                                                         | O60462  |
| IPI00376904                                                                                     | Q9UNZ2  |
| IPI00295542,IPI00790899                                                                         | Q02818, |
| IPI00009123,IPI00746961                                                                         | P80303, |
| IPI00022145                                                                                     | Q9H1E3, |
| IPI00550746,IPI00646767,IPI00647418                                                             | Q9Y266, |
| IPI00646917                                                                                     | O43809, |
| IPI00296913,IPI00646762                                                                         | Q9UKK9, |
| IPI00009901                                                                                     | P61970, |
| IPI00328703                                                                                     | Q86UD1  |
| IPI00010796                                                                                     | P07237, |
| IPI00299000,IPI00794875                                                                         | Q9UQ80, |
| IPI00008524,IPI00410017,IPI00478522,IPI00796945                                                 | P11940, |
| IPI00555747                                                                                     | Q13310, |
| IPI00005792,IPI00414963                                                                         | Q86U42, |
| IPI00026546                                                                                     | P68402, |
| IPI00014808                                                                                     | Q15102, |
| IPI00217223                                                                                     | P22234, |
| IPI00656138                                                                                     | Q13153, |
| IPI00419979                                                                                     | Q13177, |
| IPI00177543,IPI00219041,IPI00219042,IPI00219043,IPI00749176                                     | P19021, |
| IPI00011619                                                                                     | O43252, |
| IPI00298547                                                                                     | Q99497, |
| IPI00449049                                                                                     | P09874, |
| IPI00218568                                                                                     | P61457, |
| IPI00016610                                                                                     | Q15365, |
| IPI00012066,IPI00216689,IPI00796337                                                             | Q15366, |
| IPI00645206                                                                                     | O14917  |
| IPI00552819                                                                                     | Q8TAB3, |

|                                     |         |
|-------------------------------------|---------|
| IPI00411680,IPI00828189             | P22061, |
| IPI00024989                         | P22061, |
| IPI00021700                         | P12004, |
| IPI00002543                         | Q9UKZ9, |
| IPI00002280                         | Q9UHG2, |
| IPI00013297                         | Q13442, |
| IPI00023640                         | O14737, |
| IPI00025277                         | O75340, |
| IPI00246058                         | Q8WUM4, |
| IPI00025252,IPI00657680             | P30101, |
| IPI00009904                         | P13667, |
| IPI00299571                         | Q15084, |
| IPI00219446                         | P30086, |
| IPI00000828                         | P01210, |
| IPI00004534                         | O15067, |
| IPI00015891                         | Q9NQP4, |
| IPI00216691                         | P07737, |
| IPI00107555,IPI00219468             | P35080, |
| IPI00219525                         | P52209, |
| IPI00169383                         | P00558, |
| IPI00029997                         | O95336, |
| IPI00550364                         | Q96G03, |
| IPI00220739                         | O00264, |
| IPI00011200                         | O43175, |
| IPI00013723                         | Q13526, |
| IPI00012575                         | O00625, |
| IPI00220644                         | P14618, |
| IPI00479186                         | P14618, |
| IPI00024578                         | Q9NZ20, |
| IPI00027192                         | Q02809, |
| IPI00030255                         | O60568, |
| IPI00018272                         | Q9NVS9, |
| IPI00015018                         | Q15181, |
| IPI00419585                         | P62937, |
| IPI00646304                         | P23284, |
| IPI00300952                         | Q9H2H8, |
| IPI00006167                         | O15355, |
| IPI00218236                         | P62140, |
| IPI00398922                         | Q96C90, |
| IPI00008380,IPI00815784             | P67775, |
| IPI00419307,IPI00554737             | P30153, |
| IPI00002412                         | P50897, |
| IPI00000874                         | Q06830, |
| IPI00027350                         | P32119, |
| IPI00011937                         | Q13162, |
| IPI00024915,IPI00759663             | P30044, |
| IPI00375306                         | A6NG06  |
| IPI00220301                         | P30041, |
| IPI00026154,IPI00792916             | P14314, |
| IPI00296337,IPI00376215             | P78527, |
| IPI00064328                         | O14744, |
| IPI00016346                         | O94903, |
| IPI00552495                         | P60891  |
| IPI00219617,IPI00718888             | P11908, |
| IPI00217053,IPI00744319             | Q7L2U7  |
| IPI00026941                         | O95084, |
| IPI00012503,IPI00219825,IPI00744835 | P07602, |
| IPI00001734,IPI00219478             | Q9Y617  |
| IPI00028122                         | O75475, |

|                                                 |         |
|-------------------------------------------------|---------|
| IPI00016832,IPI00472442                         | P25786, |
| IPI00219622                                     | P25787, |
| IPI00171199,IPI00419249                         | P25788, |
| IPI00795606                                     | P25789  |
| IPI00291922                                     | P28066, |
| IPI00029623                                     | P60900, |
| IPI00024175                                     | O14818, |
| IPI00025019                                     | P20618, |
| IPI00028006                                     | P49721, |
| IPI00028004                                     | P49720, |
| IPI00555956                                     | P28070, |
| IPI00003217                                     | Q99436, |
| IPI00020042,IPI00216770                         | P43686, |
| IPI00023919,IPI00745502                         | P62195, |
| IPI00021926                                     | P62333, |
| IPI00299608,IPI00456695                         | Q99460, |
| IPI00105598                                     | O00231, |
| IPI00375380                                     | Q9UNM6, |
| IPI00012268                                     | Q13200, |
| IPI00011603                                     | O43242, |
| IPI00022694                                     | P55036, |
| IPI00019927                                     | P51665, |
| IPI00479722                                     | Q06323  |
| IPI00384051,IPI00746205                         | Q9UL46, |
| IPI00103525                                     | Q8WXF1  |
| IPI00179964,IPI00183626,IPI00334175             | P26599, |
| IPI00015029,IPI00789101,IPI00789698             | Q15185, |
| IPI00022048                                     | Q9P2B2, |
| IPI00298292                                     | Q13308, |
| IPI00375547                                     | P23468, |
| IPI00465186                                     | P10586, |
| IPI00107831,IPI00642154                         | P10586, |
| IPI00011651                                     | P23470, |
| IPI00015756                                     | Q15262, |
| IPI00743517                                     | Q13332  |
| IPI00748312                                     | P23471, |
| IPI00029568                                     | P26022, |
| IPI00219425                                     | P15151, |
| IPI00003648                                     | Q15223, |
| IPI00016112,IPI00787655                         | Q4KMG2  |
| IPI00470525,IPI00783313                         | P06737, |
| IPI00003919                                     | Q16769, |
| IPI00465016                                     | O00391, |
| IPI00376394,IPI00479085,IPI00783371             | Q6ZRP7, |
| IPI00020436                                     | Q15907, |
| IPI00291928                                     | P61106, |
| IPI00016342                                     | P51149, |
| IPI00008219                                     | P54725, |
| IPI00008223                                     | P54727, |
| IPI00749517                                     | P78406  |
| IPI00792352,IPI00793015                         |         |
| IPI00026337,IPI00179121,IPI00456728,IPI00456729 | Q9H6Z4, |
| IPI00329200,IPI00783829,IPI00793443             | O00410, |
| IPI00294879,IPI00411570                         | P46060, |
| IPI00004860,IPI00759723                         | P54136, |
| IPI00328319,IPI00645329                         | Q09028, |
| IPI00395865                                     | Q16576, |
| IPI00024320,IPI00604407                         | P98179, |
| IPI00001757,IPI00216659                         | Q9Y5S9, |

|                                                 |                |
|-------------------------------------------------|----------------|
| IPI00304692                                     | P38159,        |
| IPI00219718                                     | P09455,        |
| IPI00465044                                     | Q9P258,        |
| IPI00015842                                     | Q15293,        |
| IPI00216890                                     | Q8IUW5         |
| IPI00788176                                     | Q9Y644         |
| IPI00027500                                     | P61586,        |
| IPI00029699                                     | P34096,        |
| IPI00414896                                     | O00584,        |
| IPI00550069                                     | P13489,        |
| IPI00647400                                     | Q9H4A4         |
| IPI00829739                                     | Q9Y6N7         |
| IPI00412579,IPI00827508                         | P62906,        |
| IPI00219153                                     | P35268,        |
| IPI00003918                                     | P36578,        |
| IPI00008530,IPI00556485,IPI00791448             | P05388,        |
| IPI00008527                                     | P05386,        |
| IPI00008529                                     | P05387,        |
| IPI00008438                                     | P46783,        |
| IPI00025091                                     | P62280,        |
| IPI00221089                                     | P62277,        |
| IPI00026271                                     | P62263,        |
| IPI00215780                                     | P39019,        |
| IPI00017448,IPI00387084,IPI00797280             | P63220,        |
| IPI00793330                                     | P62988,P62987, |
| IPI00011253                                     | P23396,        |
| IPI00217030                                     | P62701,        |
| IPI00008433                                     | P46782,        |
| IPI00013415                                     | P62081,        |
| IPI00216587                                     | P62241,        |
| IPI00413108,IPI00553164                         | P08865,        |
| IPI00013871                                     | P23921,        |
| IPI00646058                                     | Q15424,        |
| IPI00005648                                     | Q14151,        |
| IPI00006025                                     | Q15020,        |
| IPI00177968,IPI00291007,IPI00447020             | Q8WTV0,        |
| IPI00793201                                     | Q12904         |
| IPI00002441                                     | P18827,        |
| IPI00299086,IPI00479018                         | O00560,        |
| IPI00106646                                     | Q9BRK5,        |
| IPI00005809                                     | O95810,        |
| IPI00024570                                     | Q9NS98,        |
| IPI00023807                                     | Q92854,        |
| IPI00025257                                     | O75326,        |
| IPI00030877                                     | O60613,        |
| IPI00029056                                     | P49903,        |
| IPI00455033,IPI00784614,IPI00784808,IPI00784936 | Q9UHD8,        |
| IPI00412714,IPI00470498                         | Q8NC51,        |
| IPI00006114                                     | P36955,        |
| IPI00016150                                     | Q99574,        |
| IPI00072377                                     | Q01105,        |
| IPI00386119                                     | Q15637,        |
| IPI00017451,IPI00470590                         | Q15459,        |
| IPI00029764                                     | Q12874,        |
| IPI00026089                                     | O75533,        |
| IPI00221106                                     | Q13435,        |
| IPI00017339                                     | Q15427,        |
| IPI00013890                                     | P31947,        |
| IPI00010740                                     | P23246,        |

|                                                                         |         |
|-------------------------------------------------------------------------|---------|
| IPI00749245                                                             | Q8N474, |
| IPI00218591                                                             | Q07955, |
| IPI00301503,IPI00472633,IPI00555647                                     | P62995, |
| IPI00010204                                                             | P84103, |
| IPI00003377                                                             | Q16629, |
| IPI00012340,IPI00793205                                                 | Q13242, |
| IPI00414984,IPI00418183                                                 | O43556, |
| IPI00013949                                                             | O43765, |
| IPI00069750,IPI00100716,IPI00788826,IPI00797595                         | Q96D94  |
| IPI00647217                                                             | P42285, |
| IPI00301364                                                             | P63208, |
| IPI00019472                                                             | Q15758, |
| IPI00008085                                                             | Q9ULF5  |
| IPI00554702,IPI00604710                                                 | P08195  |
| IPI00017640                                                             | O75094, |
| IPI00176398                                                             | Q9H5Y7, |
| IPI00301812,IPI00412898                                                 | Q9H4F8, |
| IPI00395336                                                             | Q9H3U7, |
| IPI00005102                                                             | P52788, |
| IPI00140420                                                             | Q7KZF4, |
| IPI00012382                                                             | P09012, |
| IPI00027285,IPI00329512,IPI00384173,IPI00395674,IPI00785142,IPI00792592 | P14678, |
| IPI00013396,IPI00641788                                                 | P09234, |
| IPI00302850                                                             | P62314, |
| IPI00017963                                                             | P62316, |
| IPI00017964                                                             | P62318, |
| IPI00218733,IPI00783680                                                 | P00441, |
| IPI00216057                                                             | Q00796, |
| IPI00022608                                                             | Q92673, |
| IPI00011643,IPI00376403                                                 | O43278, |
| IPI00005292                                                             | Q08629, |
| IPI00021000,IPI00385896                                                 | P10451, |
| IPI00306339                                                             | P10451  |
| IPI00745092                                                             | Q13813, |
| IPI00744706                                                             | Q13813, |
| IPI00005614                                                             | Q01082, |
| IPI00789296                                                             | P37108  |
| IPI00293434                                                             | P37108, |
| IPI00642816                                                             | P49458, |
| IPI00009032                                                             | P05455, |
| IPI00032826                                                             | P50502, |
| IPI00001922                                                             | Q9Y5Y6, |
| IPI00013887                                                             | P15907, |
| IPI00000001,IPI00218609,IPI00641873,IPI00643664                         | O95793, |
| IPI00008780                                                             | O76061, |
| IPI00013894                                                             | P31948, |
| IPI00479997,IPI00642012,IPI00643115,IPI00744618                         | P16949, |
| IPI00294536                                                             | Q9Y3F4, |
| IPI00221222                                                             | P53999, |
| IPI00018140,IPI00402182,IPI00402183,IPI00402184                         | O60506, |
| IPI00296215                                                             | P16422, |
| IPI00020194,IPI00294426                                                 | Q92804, |
| IPI00647915                                                             | P37802  |
| IPI00550488,IPI00744692                                                 | P37837, |
| IPI00025815                                                             | Q13148, |
| IPI00329633                                                             | P26639, |
| IPI00217236                                                             | O75347, |
| IPI00300341,IPI00645048,IPI00791185,IPI00796346                         | Q15369, |
| IPI00026670                                                             | Q15370, |

|                                                                         |                |
|-------------------------------------------------------------------------|----------------|
| IPI00247871                                                             | O14776,        |
| IPI00290566                                                             | P17987,        |
| IPI00294619,IPI00788849                                                 | Q92734,        |
| IPI00022462                                                             | P02786,        |
| IPI00235354                                                             | P61812,        |
| IPI00296099                                                             | P07996,        |
| IPI00328840                                                             | Q86V81,        |
| IPI00549189                                                             | P52888,        |
| IPI00027166,IPI00787781,IPI00788747                                     | P16035,        |
| IPI00005563                                                             | Q9GZM7,        |
| IPI00643920,IPI00788802                                                 | P29401,        |
| IPI00298994,IPI00784273                                                 | Q9Y490,        |
| IPI00301865,IPI00383814                                                 | Q24JP5         |
| IPI00443909                                                             | Q9Y2B0,        |
| IPI00005087                                                             | Q9NYL9,        |
| IPI00216230                                                             | P42166,        |
| IPI00024364                                                             | Q92973,        |
| IPI00419856                                                             | O14787         |
| IPI00218323,IPI00619951,IPI00619958,IPI00782968                         | P55327,        |
| IPI00383670,IPI00472076,IPI00793361                                     | Q16890,        |
| IPI00743469                                                             | O43399         |
| IPI00465028,IPI00797687                                                 | P60174,        |
| IPI00178083,IPI00218319,IPI00479185                                     | P06753,        |
| IPI00010779                                                             | P67936,        |
| IPI00009943                                                             | P13693,        |
| IPI00641368                                                             | Q8WUA8,        |
| IPI00018768                                                             | Q15631,        |
| IPI00030914                                                             | P62079,        |
| IPI00029048                                                             | Q14166,        |
| IPI00180675                                                             | Q71U36,        |
| IPI00387144,IPI00792677                                                 | P68363,        |
| IPI00011654                                                             | P07437,        |
| IPI00031370                                                             | Q9BVA1         |
| IPI00007752                                                             | P68371,        |
| IPI00013683                                                             | Q13509,        |
| IPI00646779                                                             | Q9BUF5,        |
| IPI00216298                                                             | P10599,        |
| IPI00008552                                                             | O76003,        |
| IPI00646689                                                             | Q9BRA2,        |
| IPI00743646,IPI00830010                                                 | Q16881         |
| IPI00031556,IPI00746657,IPI00830039                                     | P26368,        |
| IPI00645078                                                             | P22314,        |
| IPI00032957,IPI00450472                                                 | P63279,        |
| IPI00021347                                                             | P68036,        |
| IPI00003949                                                             | P61088,        |
| IPI00019599,IPI00019600,IPI00030962,IPI00397947,IPI00447356,IPI00472498 | Q13404,Q15819, |
| IPI00797889                                                             | Q15819         |
| IPI00071180                                                             | Q9UMX0,        |
| IPI00024502                                                             | Q9NRR5,        |
| IPI00018352                                                             | P09936,        |
| IPI00219512,IPI00219513,IPI00299313,IPI00549820,IPI00549849,IPI00642374 | Q9Y5K5,        |
| IPI00301489                                                             | P06132,        |
| IPI00375145                                                             | P45974,        |
| IPI00646721                                                             | Q93009,        |
| IPI00642826                                                             | Q9P0L0,        |
| IPI00334159                                                             | P61758,        |
| IPI00009802,IPI00215628,IPI00215629,IPI00215631                         | P13611,        |
| IPI00291175,IPI00307162                                                 | P18206,        |
| IPI00022774                                                             | P55072,        |

|                                                 |         |
|-------------------------------------------------|---------|
| IPI00746388                                     | P15311, |
| IPI00170796,IPI00184284,IPI00798102             | Q9UBQ0, |
| IPI00018931                                     | Q96QK1, |
| IPI00216313                                     | P62760, |
| IPI00394834                                     |         |
| IPI00412737                                     | P23381  |
| IPI00746165                                     | O75083, |
| IPI00019269,IPI00789452                         | Q9GZS3, |
| IPI00291488                                     | Q14508, |
| IPI00001863                                     | Q9Y5W5, |
| IPI00013178,IPI00795811                         | P41221, |
| IPI00298961,IPI00784388                         | O14980, |
| IPI00220834                                     | P13010, |
| IPI00465430                                     | P12956, |
| IPI00012197                                     | Q9H773  |
| IPI00432723                                     | Q9H1B5, |
| IPI00007074                                     | P54577, |
| IPI00031812,IPI00385699,IPI00450235             | P67809, |
| IPI00013981,IPI00477734                         | P07947, |
| IPI00216318,IPI00759832                         | P31946, |
| IPI00000816                                     | P62258, |
| IPI00220642                                     | P61981, |
| IPI00018146                                     | P27348, |
| IPI00021263                                     | P63104, |
| IPI00013457,IPI00219759,IPI00788670,IPI00792837 | O43670, |
