# Supplementary material
Source: PubMed Central journal article supplement (PMC2816016)
Supplement: M900134-MCP200_2.pdf [file M900134-MCP200_2.pdf]

## Supplementary Table 7: List of proteins identified by mass spectrometry in

| Protein name                                                                                  |
|-----------------------------------------------------------------------------------------------|
| Gene_Symbol=- 12 kDa protein                                                                  |
| Gene_Symbol=- 27 kDa protein                                                                  |
| Gene_Symbol=- CD68 antigen variant (Fragment)                                                 |
| Gene_Symbol=- Hypothetical protein                                                            |
| Gene_Symbol=- P37 AUF1                                                                        |
| Gene_Symbol=ABHD14B Isoform 1 of Abhydrolase domain-containing protein 14B                    |
| Gene_Symbol=ACLY ATP-citrate synthase                                                         |
| Gene_Symbol=ACTA1 Actin, alpha skeletal muscle                                                |
| Gene_Symbol=ACTG1 Actin, cytoplasmic 2                                                        |
| Gene_Symbol=ACTN1 Alpha-actinin-1                                                             |
| Gene_Symbol=ACTN4 Alpha-actinin-4                                                             |
| Gene_Symbol=ACTR2 Actin-like protein 2                                                        |
| Gene_Symbol=ADAM10 ADAM 10 precursor                                                          |
| Gene_Symbol=ADAM15 a disintegrin and metalloproteinase domain 15 isoform 4 preproprotein      |
| Gene_Symbol=ADAM17 Isoform B of ADAM 17 precursor                                             |
| Gene_Symbol=ADAM19 Isoform A of ADAM 19 precursor                                             |
| Gene_Symbol=ADAM23 Isoform Alpha of ADAM 23 precursor                                         |
| Gene_Symbol=ADAM9 ADAM9 protein                                                               |
| Gene_Symbol=ADAMTS1 ADAMTS-1 precursor                                                        |
| Gene_Symbol=AGR2 AGR2                                                                         |
| Gene_Symbol=AGRN Agrin precursor                                                              |
| Gene_Symbol=AHCY Adenosylhomocysteinase                                                       |
| Gene_Symbol=AHNAK 313 kDa protein                                                             |
| Gene_Symbol=AHSA1 Activator of 90 kDa heat shock protein ATPase homolog 1                     |
| Gene_Symbol=AKR1B1 Aldose reductase                                                           |
| Gene_Symbol=AKR1B10 Aldo-keto reductase family 1 member B10                                   |
| Gene_Symbol=AKR1C1 Aldo-keto reductase family 1 member C1                                     |
| Gene_Symbol=AKR1C2 Aldo-keto reductase family 1 member C2                                     |
| Gene_Symbol=AKR1C3 Aldo-keto reductase family 1 member C3                                     |
| Gene_Symbol=ALCAM Isoform 1 of CD166 antigen precursor                                        |
| Gene_Symbol=ALDH3A1 Aldehyde dehydrogenase, dimeric NADP-preferring                           |
| Gene_Symbol=ALDOA Fructose-bisphosphate aldolase A                                            |
| Gene_Symbol=AMBP AMBP protein precursor                                                       |
| Gene_Symbol=ANGPTL4 Angiotensin-related protein 4 precursor                                   |
| Gene_Symbol=ANP32A Acidic leucine-rich nuclear phosphoprotein 32 family member A              |
| Gene_Symbol=ANP32B Isoform 1 of Acidic leucine-rich nuclear phosphoprotein 32 family member B |
| Gene_Symbol=ANP32E Acidic leucine-rich nuclear phosphoprotein 32 family member E              |
| Gene_Symbol=ANTXR1 Isoform 1 of Anthrax toxin receptor 1 precursor                            |
| Gene_Symbol=ANXA1 Annexin A1                                                                  |
| Gene_Symbol=ANXA2 annexin A2 isoform 1                                                        |
| Gene_Symbol=ANXA5 Annexin A5                                                                  |
| Gene_Symbol=APEX1 DNA-(apurinic or apyrimidinic site) lyase                                   |
| Gene_Symbol=APLP2 Isoform 1 of Amyloid-like protein 2 precursor                               |
| Gene_Symbol=APOA1BP Apolipoprotein A-I binding protein                                        |
| Gene_Symbol=APP Isoform APP770 of Amyloid beta A4 protein precursor (Fragment)                |
| Gene_Symbol=ARF1 ADP-ribosylation factor 1                                                    |
| Gene_Symbol=ARHGDI26 26 kDa protein                                                           |
| Gene_Symbol=ARL3 ADP-ribosylation factor-like protein 3                                       |
| Gene_Symbol=ARMET ARMET protein precursor                                                     |
| Gene_Symbol=ASAH1 N-acylsphingosine amidohydrolase (acid ceramidase) 1 isoform b              |
| Gene_Symbol=ASPH Aspartyl/asparaginyl beta-hydroxylase                                        |
| Gene_Symbol=ATIC Bifunctional purine biosynthesis protein PURH                                |
| Gene_Symbol=ATP6AP1 53 kDa protein                                                            |
| Gene_Symbol=ATP6AP2 Renin receptor precursor                                                  |
| Gene_Symbol=ATP6V1B2 Vacuolar ATP synthase subunit B, brain isoform                           |
| Gene_Symbol=ATRNL1 Isoform 1 of Attractin precursor                                           |
| Gene_Symbol=AXL AXL receptor tyrosine kinase isoform 1                                        |
| Gene_Symbol=B2M Beta-2-microglobulin precursor                                                |
| Gene_Symbol=B3GAT3 B3GAT3 protein (Fragment)                                                  |
| Gene_Symbol=B3GNT1 N-acetylglucosaminide beta-1,3-N-acetylglucosaminyltransferase             |

|                                                                                                  |
|--------------------------------------------------------------------------------------------------|
| Gene_Symbol=B4GALT1 Isoform Short of Beta-1,4-galactosyltransferase 1                            |
| Gene_Symbol=B4GALT3 44 kDa protein                                                               |
| Gene_Symbol=B4GALT4 Beta-1,4-galactosyltransferase 4                                             |
| Gene_Symbol=BAG3 BAG family molecular chaperone regulator 3                                      |
| Gene_Symbol=BASP1 Brain acid soluble protein 1                                                   |
| Gene_Symbol=BCCIP Isoform 2 of BRCA2 and CDKN1A-interacting protein                              |
| Gene_Symbol=BCHE Cholinesterase precursor                                                        |
| Gene_Symbol=BDNF Brain-derived neurotrophic factor precursor                                     |
| Gene_Symbol=BLVRA Biliverdin reductase A precursor                                               |
| Gene_Symbol=BMP1 Isoform BMP1-1 of Bone morphogenetic protein 1 precursor                        |
| Gene_Symbol=BMP1 Isoform BMP1-5 of Bone morphogenetic protein 1 precursor                        |
| Gene_Symbol=BOLA2B;BOLA2 Bola-like protein 2 isoform a                                           |
| Gene_Symbol=BSG 46 kDa protein                                                                   |
| Gene_Symbol=BST1 ADP-ribosyl cyclase 2 precursor                                                 |
| Gene_Symbol=BTD biotinidase precursor                                                            |
| Gene_Symbol=BTF3 Isoform 2 of Transcription factor BTF3                                          |
| Gene_Symbol=C12orf39 Uncharacterized protein C12orf39 precursor                                  |
| Gene_Symbol=C19orf10 Uncharacterized protein C19orf10 precursor                                  |
| Gene_Symbol=C1QBP Complement component 1 Q subcomponent-binding protein, mitochondrial precursor |
| Gene_Symbol=C1R Complement C1r subcomponent precursor                                            |
| Gene_Symbol=C1S Complement C1s subcomponent precursor                                            |
| Gene_Symbol=C4orf18 Uncharacterized protein C4orf18                                              |
| Gene_Symbol=CACYBP Isoform 1 of Calcyclin-binding protein                                        |
| Gene_Symbol=CALM3;CALM2;CALM1 Calmodulin                                                         |
| Gene_Symbol=CALR Calreticulin precursor                                                          |
| Gene_Symbol=CALU Isoform 1 of Calumenin precursor                                                |
| Gene_Symbol=CAND1 Isoform 1 of Cullin-associated NEDD8-dissociated protein 1                     |
| Gene_Symbol=CANT1 Isoform 1 of Soluble calcium-activated nucleotidase 1                          |
| Gene_Symbol=CANX Calnexin precursor                                                              |
| Gene_Symbol=CAPZA1 F-actin capping protein subunit alpha-1                                       |
| Gene_Symbol=CAPZB Capping protein (Actin filament) muscle Z-line, beta                           |
| Gene_Symbol=CAST calpastatin isoform e                                                           |
| Gene_Symbol=CBR1 Carbonyl reductase [NADPH] 1                                                    |
| Gene_Symbol=CBX1 Chromobox protein homolog 1                                                     |
| Gene_Symbol=CBX3;LOC653972 Chromobox protein homolog 3                                           |
| Gene_Symbol=CCDC80 steroid-sensitive protein 1                                                   |
| Gene_Symbol=CCT2 T-complex protein 1 subunit beta                                                |
| Gene_Symbol=CCT4 T-complex protein 1 subunit delta                                               |
| Gene_Symbol=CCT5 T-complex protein 1 subunit epsilon                                             |
| Gene_Symbol=CCT7 T-complex protein 1 subunit eta                                                 |
| Gene_Symbol=CCT8 Chaperonin containing TCP1, subunit 8 (Theta) variant                           |
| Gene_Symbol=CD109 Isoform 1 of CD109 antigen precursor                                           |
| Gene_Symbol=CD14 Monocyte differentiation antigen CD14 precursor                                 |
| Gene_Symbol=CD44 Isoform CD44 of CD44 antigen precursor                                          |
| Gene_Symbol=CD55 Isoform 1 of Complement decay-accelerating factor precursor                     |
| Gene_Symbol=CD70 Tumor necrosis factor ligand superfamily member 7                               |
| Gene_Symbol=CD81 CD81 antigen                                                                    |
| Gene_Symbol=CDH10 Cadherin-10 precursor                                                          |
| Gene_Symbol=CDH11 Isoform 2 of Cadherin-11 precursor                                             |
| Gene_Symbol=CDH13 Cadherin-13 precursor                                                          |
| Gene_Symbol=CFD complement factor D preproprotein                                                |
| Gene_Symbol=CFH Isoform 1 of Complement factor H precursor                                       |
| Gene_Symbol=CFHR3 Complement factor H-related 3                                                  |
| Gene_Symbol=CFL1 Cofilin-1                                                                       |
| Gene_Symbol=CGREF1 Cell growth regulator with EF hand domain protein 1                           |
| Gene_Symbol=CHERP calcium homeostasis endoplasmic reticulum protein                              |
| Gene_Symbol=CHGA chromogranin A precursor                                                        |
| Gene_Symbol=ChGn Isoform 1 of Chondroitin beta-1,4-N-acetylgalactosaminyltransferase 1           |
| Gene_Symbol=CHID1 Isoform 2 of Chitinase domain-containing protein 1 precursor                   |
| Gene_Symbol=CHL1 Isoform 1 of Neural cell adhesion molecule L1-like protein precursor            |
| Gene_Symbol=CHL1 Isoform 2 of Neural cell adhesion molecule L1-like protein precursor            |
| Gene_Symbol=CHPF Chondroitin sulfate synthase 2                                                  |
| Gene_Symbol=CIRBP Cold-inducible RNA-binding protein                                             |

|                                                                                                            |
|------------------------------------------------------------------------------------------------------------|
| Gene_Symbol=CKB Creatine kinase B-type                                                                     |
| Gene_Symbol=CLEC11A C-type lectin domain family 11 member A precursor                                      |
| Gene_Symbol=CLIC1 Chloride intracellular channel protein 1                                                 |
| Gene_Symbol=CLINT1 Isoform 1 of Clathrin interactor 1                                                      |
| Gene_Symbol=CLSTN1 calyculin 1 isoform 2                                                                   |
| Gene_Symbol=CLTC Isoform 1 of Clathrin heavy chain 1                                                       |
| Gene_Symbol=CLU Clusterin precursor                                                                        |
| Gene_Symbol=CNBP Isoform 2 of Cellular nucleic acid-binding protein                                        |
| Gene_Symbol=CNDP2 Cytosolic nonspecific dipeptidase                                                        |
| Gene_Symbol=CNTN1 Isoform 1 of Contactin-1 precursor                                                       |
| Gene_Symbol=COCH Cochlin precursor                                                                         |
| Gene_Symbol=COL4A1 Collagen alpha-1(IV) chain precursor                                                    |
| Gene_Symbol=COL4A2 Collagen alpha-2(IV) chain precursor                                                    |
| Gene_Symbol=COL4A6 Isoform B of Collagen alpha-6(IV) chain precursor                                       |
| Gene_Symbol=COL5A1 Collagen alpha-1(V) chain precursor                                                     |
| Gene_Symbol=COL5A2 alpha 2 type V collagen preproprotein                                                   |
| Gene_Symbol=COL6A1 Collagen alpha-1(VI) chain precursor                                                    |
| Gene_Symbol=COL8A1 Cell proliferation-inducing protein 41                                                  |
| Gene_Symbol=COPB1 Coatamer subunit beta                                                                    |
| Gene_Symbol=CORO1C Coronin-1C                                                                              |
| Gene_Symbol=CPS1 Isoform 1 of Carbamoyl-phosphate synthase [ammonia], mitochondrial precursor              |
| Gene_Symbol=CPVL Serine carboxypeptidase CPVL precursor                                                    |
| Gene_Symbol=CREG1 Protein CREG1 precursor                                                                  |
| Gene_Symbol=CRIM1 Cysteine-rich motor neuron 1 protein precursor                                           |
| Gene_Symbol=CRISPLD1 Cysteine-rich secretory protein LCCL domain-containing 1 precursor                    |
| Gene_Symbol=CRLF1 Cytokine receptor-like factor 1 precursor                                                |
| Gene_Symbol=CRTAP Cartilage-associated protein precursor                                                   |
| Gene_Symbol=CSE1L Isoform 1 of Exportin-2                                                                  |
| Gene_Symbol=CSF1 Isoform 1 of Macrophage colony-stimulating factor 1 precursor                             |
| Gene_Symbol=CSRP1 Cysteine and glycine-rich protein 1                                                      |
| Gene_Symbol=CST3 Cystatin-C precursor                                                                      |
| Gene_Symbol=CSTB Cystatin-B                                                                                |
| Gene_Symbol=CTBS Di-N-acetylchitinase precursor                                                            |
| Gene_Symbol=CTGF Isoform 1 of Connective tissue growth factor precursor                                    |
| Gene_Symbol=CTSA 62 kDa protein                                                                            |
| Gene_Symbol=CTSB Cathepsin B precursor                                                                     |
| Gene_Symbol=CTSC Dipeptidyl-peptidase 1 precursor                                                          |
| Gene_Symbol=CTSD Cathepsin D precursor                                                                     |
| Gene_Symbol=CTSL1 Cathepsin L precursor                                                                    |
| Gene_Symbol=CTSZ Cathepsin Z precursor                                                                     |
| Gene_Symbol=CUTA Isoform B of Protein CutA precursor                                                       |
| Gene_Symbol=CXCL1 Growth-regulated protein alpha precursor                                                 |
| Gene_Symbol=CXCL5 Small inducible cytokine B5 precursor                                                    |
| Gene_Symbol=CYCS Cytochrome c                                                                              |
| Gene_Symbol=CYR61 Protein CYR61 precursor                                                                  |
| Gene_Symbol=D4ST1 Carbohydrate sulfotransferase D4ST1                                                      |
| Gene_Symbol=DAG1 Dystroglycan precursor                                                                    |
| Gene_Symbol=DBI Isoform 2 of Acyl-CoA-binding protein                                                      |
| Gene_Symbol=DDT D-dopachrome decarboxylase                                                                 |
| Gene_Symbol=DDX21 Isoform 1 of Nucleolar RNA helicase 2                                                    |
| Gene_Symbol=DDX3X ATP-dependent RNA helicase DDX3X                                                         |
| Gene_Symbol=DHX9 ATP-dependent RNA helicase A                                                              |
| Gene_Symbol=DKFZp686O24166 Hypothetical protein DKFZp686I21167                                             |
| Gene_Symbol=DNAJB11 DnaJ homolog subfamily B member 11 precursor                                           |
| Gene_Symbol=DNAJB6 Isoform A of DnaJ homolog subfamily B member 6                                          |
| Gene_Symbol=DNAJC3 Isoform 1 of DnaJ homolog subfamily C member 3                                          |
| Gene_Symbol=DNER Delta and Notch-like epidermal growth factor-related receptor precursor                   |
| Gene_Symbol=DNM1L Isoform 4 of Dynamin-1-like protein                                                      |
| Gene_Symbol=DPYSL2 Dihydropyrimidinase-related protein 2                                                   |
| Gene_Symbol=DSC2 Isoform 2A of Desmocollin-2 precursor                                                     |
| Gene_Symbol=DSG2 desmoglein 2 preproprotein                                                                |
| Gene_Symbol=DSTN destrin isoform b                                                                         |
| Gene_Symbol=DUT Isoform DUT-M of Deoxyuridine 5'-triphosphate nucleotidohydrolase, mitochondrial precursor |

|                                                                                                                     |
|---------------------------------------------------------------------------------------------------------------------|
| Gene_Symbol=DYNC1H1 Dynein heavy chain, cytosolic                                                                   |
| Gene_Symbol=DYNLL1 Dynein light chain 1, cytoplasmic                                                                |
| Gene_Symbol=ECM1 Extracellular matrix protein 1 precursor                                                           |
| Gene_Symbol=EDIL3 Isoform 1 of EGF-like repeat and discoidin I-like domain-containing protein 3 precursor           |
| Gene_Symbol=EEF1A1 Elongation factor 1-alpha 1                                                                      |
| Gene_Symbol=EEF1A2 Elongation factor 1-alpha 2                                                                      |
| Gene_Symbol=EEF1B2 Elongation factor 1-beta                                                                         |
| Gene_Symbol=EEF1D eukaryotic translation elongation factor 1 delta isoform 1                                        |
| Gene_Symbol=EEF1G Elongation factor 1-gamma                                                                         |
| Gene_Symbol=EEF2 Elongation factor 2                                                                                |
| Gene_Symbol=EFEMP1 Isoform 1 of EGF-containing fibulin-like extracellular matrix protein 1 precursor                |
| Gene_Symbol=EFHD2 EF-hand domain-containing protein 2                                                               |
| Gene_Symbol=EFNA5 Ephrin-A5 precursor                                                                               |
| Gene_Symbol=EIF1 Eukaryotic translation initiation factor 1                                                         |
| Gene_Symbol=EIF2S1 Eukaryotic translation initiation factor 2 subunit 1                                             |
| Gene_Symbol=EIF2S3 Eukaryotic translation initiation factor 2 subunit 3                                             |
| Gene_Symbol=EIF3S1 Eukaryotic translation initiation factor 3 subunit 1                                             |
| Gene_Symbol=EIF3S4 Eukaryotic translation initiation factor 3 subunit 4                                             |
| Gene_Symbol=EIF3S5 Eukaryotic translation initiation factor 3 subunit 5                                             |
| Gene_Symbol=EIF3S6IP DJ1014D13.1 protein (Eukaryotic translation initiation factor 3 subunit 6-interacting protein) |
| Gene_Symbol=EIF4B Eukaryotic translation initiation factor 4B                                                       |
| Gene_Symbol=EIF4E Similar to Eukaryotic translation initiation factor 4E                                            |
| Gene_Symbol=EIF4G1 EIF4G1 variant protein (Fragment)                                                                |
| Gene_Symbol=EIF5A Isoform 1 of Eukaryotic translation initiation factor 5A-1                                        |
| Gene_Symbol=ENAH Isoform 2 of Protein enabled homolog                                                               |
| Gene_Symbol=ENO1 Isoform alpha-enolase of Alpha-enolase                                                             |
| Gene_Symbol=ENPP2 Isoform 1 of Ectonucleotide pyrophosphatase/phosphodiesterase family member 2 precursor           |
| Gene_Symbol=ENTPD6 Ectonucleoside triphosphate diphosphohydrolase 6                                                 |
| Gene_Symbol=EPB41L3 Isoform A of Band 4.1-like protein 3                                                            |
| Gene_Symbol=EPHA4 Ephrin type-A receptor 4 precursor                                                                |
| Gene_Symbol=EPHA5 Isoform 1 of Ephrin type-A receptor 5 precursor                                                   |
| Gene_Symbol=EPRS glutamyl-prolyl tRNA synthetase                                                                    |
| Gene_Symbol=ERP29 Endoplasmic reticulum protein ERp29 precursor                                                     |
| Gene_Symbol=ESM1 Endothelial cell-specific molecule 1 precursor                                                     |
| Gene_Symbol=EWSR1 CDNA FLJ31747 fis, clone NT2RI2007377, highly similar to RNA-BINDING PROTEIN EWS                  |
| Gene_Symbol=EXT1 Exostosin-1                                                                                        |
| Gene_Symbol=EXTL2 EXTL2 protein (Fragment)                                                                          |
| Gene_Symbol=FAM129B Niban-like protein                                                                              |
| Gene_Symbol=FAM20B Protein FAM20B precursor                                                                         |
| Gene_Symbol=FAM3C Protein FAM3C precursor                                                                           |
| Gene_Symbol=FARSA Phenylalanyl-tRNA synthetase alpha chain                                                          |
| Gene_Symbol=FASN fatty acid synthase                                                                                |
| Gene_Symbol=FAT Cadherin-related tumor suppressor homolog precursor                                                 |
| Gene_Symbol=FBLN1 Isoform C of Fibulin-1 precursor                                                                  |
| Gene_Symbol=FBLN1 Isoform D of Fibulin-1 precursor                                                                  |
| Gene_Symbol=FBN1 Fibrillin-1 precursor                                                                              |
| Gene_Symbol=FBN2 fibrillin 2 precursor                                                                              |
| Gene_Symbol=FDPS Farnesyl diphosphate synthase                                                                      |
| Gene_Symbol=FER1L3 Isoform 1 of Myoferlin                                                                           |
| Gene_Symbol=FH Isoform Mitochondrial of Fumarate hydratase, mitochondrial precursor                                 |
| Gene_Symbol=FKBP10 FK506-binding protein 10 precursor                                                               |
| Gene_Symbol=FKBP3 FK506-binding protein 3                                                                           |
| Gene_Symbol=FKBP4 FK506-binding protein 4                                                                           |
| Gene_Symbol=FLJ10292 Protein mago nashi homolog 2                                                                   |
| Gene_Symbol=FLJ12684 hypothetical protein LOC79584                                                                  |
| Gene_Symbol=FLNA filamin A, alpha                                                                                   |
| Gene_Symbol=FLNB Isoform 1 of Filamin-B                                                                             |
| Gene_Symbol=FN1 fibronectin 1 isoform 2 preproprotein                                                               |
| Gene_Symbol=FN1 Hypothetical protein DKFZp686K08164                                                                 |
| Gene_Symbol=FN1 Isoform 1 of Fibronectin precursor                                                                  |
| Gene_Symbol=FSCN1 Fascin                                                                                            |
| Gene_Symbol=FST Isoform 1 of Follistatin precursor                                                                  |
| Gene_Symbol=FSTL1 Follistatin-related protein 1 precursor                                                           |

|                                                                                                                               |
|-------------------------------------------------------------------------------------------------------------------------------|
| Gene_Symbol=FSTL3 Follistatin-related protein 3 precursor                                                                     |
| Gene_Symbol=FSTL4 Isoform 1 of Follistatin-related protein 4 precursor                                                        |
| Gene_Symbol=FSTL4 Isoform 2 of Follistatin-related protein 4 precursor                                                        |
| Gene_Symbol=FUBP1 Isoform 1 of Far upstream element-binding protein 1                                                         |
| Gene_Symbol=FUCA1 fucosidase, alpha-L-1, tissue                                                                               |
| Gene_Symbol=FUCA2 Plasma alpha-L-fucosidase precursor                                                                         |
| Gene_Symbol=FUS Fus-like protein (Fragment)                                                                                   |
| Gene_Symbol=G3BP1 Ras GTPase-activating protein-binding protein 1                                                             |
| Gene_Symbol=G6PD glucose-6-phosphate dehydrogenase isoform a                                                                  |
| Gene_Symbol=GAA Lysosomal alpha-glucosidase precursor                                                                         |
| Gene_Symbol=GAL Galanin precursor                                                                                             |
| Gene_Symbol=GALC galactosylceramidase isoform a precursor                                                                     |
| Gene_Symbol=GALNAC4S-6ST Isoform 1 of N-acetylgalactosamine 4-sulfate 6-O-sulfotransferase                                    |
| Gene_Symbol=GALNS N-acetylgalactosamine-6-sulfatase precursor                                                                 |
| Gene_Symbol=GALNT10 Isoform 1 of Polypeptide N-acetylgalactosaminyltransferase 10                                             |
| Gene_Symbol=GALNT2 Polypeptide N-acetylgalactosaminyltransferase 2                                                            |
| Gene_Symbol=GALNT5 Polypeptide N-acetylgalactosaminyltransferase 5                                                            |
| Gene_Symbol=GALNT7 N-acetylgalactosaminyltransferase 7                                                                        |
| Gene_Symbol=GALNTL1 Isoform 1 of Putative polypeptide N-acetylgalactosaminyltransferase-like protein 1                        |
| Gene_Symbol=GANAB Isoform 2 of Neutral alpha-glucosidase AB precursor                                                         |
| Gene_Symbol=GAPDH Glycerinaldehyde-3-phosphate dehydrogenase                                                                  |
| Gene_Symbol=GARS Glycyl-tRNA synthetase                                                                                       |
| Gene_Symbol=GAS6 Isoform 2 of Growth-arrest-specific protein 6 precursor                                                      |
| Gene_Symbol=GBA Isoform Long of Glucosylceramidase precursor                                                                  |
| Gene_Symbol=GBE1 1,4-alpha-glucan branching enzyme                                                                            |
| Gene_Symbol=GCG Glucagon precursor                                                                                            |
| Gene_Symbol=GCLM Glutamate--cysteine ligase regulatory subunit                                                                |
| Gene_Symbol=GCN1L1 GCN1-like protein 1                                                                                        |
| Gene_Symbol=GCNT2 glucosaminyl (N-acetyl) transferase 2, I-branching enzyme isoform A                                         |
| Gene_Symbol=GDA Guanine deaminase                                                                                             |
| Gene_Symbol=GDF15 Growth/differentiation factor 15 precursor                                                                  |
| Gene_Symbol=GDI2 GDP dissociation inhibitor 2                                                                                 |
| Gene_Symbol=GGH Gamma-glutamyl hydrolase precursor                                                                            |
| Gene_Symbol=GLA Alpha-galactosidase A precursor                                                                               |
| Gene_Symbol=GLB1 Beta-galactosidase precursor                                                                                 |
| Gene_Symbol=GLCE D-glucuronyl C5-epimerase                                                                                    |
| Gene_Symbol=GLRX Glutaredoxin-1                                                                                               |
| Gene_Symbol=GLT25D1 CDNA PSEC0241 fis, clone NT2RP3000234, moderately similar to Homo sapiens cerebral cell adhesion molecule |
| Gene_Symbol=GM2A Ganglioside GM2 activator precursor                                                                          |
| Gene_Symbol=GMPS GMP synthase                                                                                                 |
| Gene_Symbol=GNB2L1 Lung cancer oncogene 7                                                                                     |
| Gene_Symbol=GNPTG N-acetylglucosamine-1-phosphotransferase subunit gamma precursor                                            |
| Gene_Symbol=GNS N-acetylglucosamine-6-sulfatase precursor                                                                     |
| Gene_Symbol=GOLPH2 Golgi phosphoprotein 2                                                                                     |
| Gene_Symbol=GOT1 Aspartate aminotransferase, cytoplasmic                                                                      |
| Gene_Symbol=GOT2 Aspartate aminotransferase, mitochondrial precursor                                                          |
| Gene_Symbol=GPC1 Glypican-1 precursor                                                                                         |
| Gene_Symbol=GPC6 Glypican-6 precursor                                                                                         |
| Gene_Symbol=GPI Glucose-6-phosphate isomerase                                                                                 |
| Gene_Symbol=GPIAP1 membrane component chromosome 11 surface marker 1 isoform 1                                                |
| Gene_Symbol=GPR126 Developmentally regulated G-protein-coupled receptor beta 1                                                |
| Gene_Symbol=GPX3 Glutathione peroxidase 3 precursor                                                                           |
| Gene_Symbol=GREM2 Gremlin-2 precursor                                                                                         |
| Gene_Symbol=GRN Isoform 1 of Granulins precursor                                                                              |
| Gene_Symbol=GSN Isoform 1 of Gelsolin precursor                                                                               |
| Gene_Symbol=GSR Isoform Mitochondrial of Glutathione reductase, mitochondrial precursor                                       |
| Gene_Symbol=GSTP1 Glutathione S-transferase P                                                                                 |
| Gene_Symbol=GTPBP9 Isoform 1 of Putative GTP-binding protein 9                                                                |
| Gene_Symbol=HARS Histidyl-tRNA synthetase, cytoplasmic                                                                        |
| Gene_Symbol=hCG_2015269 similar to Phosphoglycerate mutase 1 (Phosphoglycerate mutase isozyme B) (PGAM-B) (BPG-dependent PG   |
| Gene_Symbol=HDGF Hepatoma-derived growth factor                                                                               |
| Gene_Symbol=HDLBP Vigilin                                                                                                     |
| Gene_Symbol=HEXA Beta-hexosaminidase alpha chain precursor                                                                    |

|                                                                                                                 |
|-----------------------------------------------------------------------------------------------------------------|
| Gene_Symbol=HEXB Beta-hexosaminidase beta chain precursor                                                       |
| Gene_Symbol=HINT1 Histidine triad nucleotide-binding protein 1                                                  |
| Gene_Symbol=HIST1H2AH Histone H2A type 1-H                                                                      |
| Gene_Symbol=HIST1H2BD Histone H2B type 1-D                                                                      |
| Gene_Symbol=HIST1H4C;HIST2H4B;HIST2H4A;HIST1H4H;HIST1H4F;HIST1H4L;HIST1H4J;HIST1H4B;HIST1H4I;HIST1H4D;HIST4H4;H |
| Gene_Symbol=HLA-A HLA class I histocompatibility antigen, A-24 alpha chain precursor                            |
| Gene_Symbol=HLA-A HLA class I histocompatibility antigen, A-68 alpha chain precursor                            |
| Gene_Symbol=HLA-C;HLA-B;MICA;LOC730410 HLA class I histocompatibility antigen, Cw-15 alpha chain precursor      |
| Gene_Symbol=HLA-C;HLA-B;MICA;LOC730410 HLA class I histocompatibility antigen, Cw-3 alpha chain precursor       |
| Gene_Symbol=HMGB1 High-mobility group box 1 variant (Fragment)                                                  |
| Gene_Symbol=HMGB3 High mobility group protein B3                                                                |
| Gene_Symbol=HN1 Isoform 1 of Hematological and neurological expressed 1 protein                                 |
| Gene_Symbol=HNRPA1;HNRPA1L-2 Isoform A1-B of Heterogeneous nuclear ribonucleoprotein A1                         |
| Gene_Symbol=HNRPA2B1 Isoform B1 of Heterogeneous nuclear ribonucleoproteins A2/B1                               |
| Gene_Symbol=HNRPA3 Isoform 3 of Heterogeneous nuclear ribonucleoprotein A/B                                     |
| Gene_Symbol=HNRPC Isoform C1 of Heterogeneous nuclear ribonucleoproteins C1/C2                                  |
| Gene_Symbol=HNRPD heterogenous nuclear ribonucleoprotein D-like                                                 |
| Gene_Symbol=HNRPF Heterogeneous nuclear ribonucleoprotein F                                                     |
| Gene_Symbol=HNRPH1 HNRPH1 protein                                                                               |
| Gene_Symbol=HNRPK Heterogeneous nuclear ribonucleoprotein K                                                     |
| Gene_Symbol=HNRPL heterogeneous nuclear ribonucleoprotein L isoform a                                           |
| Gene_Symbol=HNRPM Isoform 1 of Heterogeneous nuclear ribonucleoprotein M                                        |
| Gene_Symbol=HNRPU Isoform Short of Heterogeneous nuclear ribonucleoprotein U                                    |
| Gene_Symbol=HPRT1 Hypoxanthine-guanine phosphoribosyltransferase                                                |
| Gene_Symbol=HS6ST2 Isoform 1 of Heparan-sulfate 6-O-sulfotransferase 2                                          |
| Gene_Symbol=HSP90AA1 Heat shock protein HSP 90-alpha 2                                                          |
| Gene_Symbol=HSP90AB1 85 kDa protein                                                                             |
| Gene_Symbol=HSP90B1 Endoplasmin precursor                                                                       |
| Gene_Symbol=HSPA1B;HSPA1A Heat shock 70 kDa protein 1                                                           |
| Gene_Symbol=HSPA4 Heat shock 70 kDa protein 4                                                                   |
| Gene_Symbol=HSPA5 HSPA5 protein                                                                                 |
| Gene_Symbol=HSPA8 Isoform 1 of Heat shock cognate 71 kDa protein                                                |
| Gene_Symbol=HSPA9 Stress-70 protein, mitochondrial precursor                                                    |
| Gene_Symbol=HSPD1 61 kDa protein                                                                                |
| Gene_Symbol=HSPE1 10 kDa heat shock protein, mitochondrial                                                      |
| Gene_Symbol=HSPG2 Basement membrane-specific heparan sulfate proteoglycan core protein precursor                |
| Gene_Symbol=HSPH1 Isoform Beta of Heat-shock protein 105 kDa                                                    |
| Gene_Symbol=HTRA1 Serine protease HTRA1 precursor                                                               |
| Gene_Symbol=HYAL1 Isoform 2 of Hyaluronidase-1 precursor                                                        |
| Gene_Symbol=HYOU1 150 kDa oxygen-regulated protein precursor                                                    |
| Gene_Symbol=IDE Insulin-degrading enzyme                                                                        |
| Gene_Symbol=IDH1 Isocitrate dehydrogenase [NADP] cytoplasmic                                                    |
| Gene_Symbol=IGF2R Cation-independent mannose-6-phosphate receptor precursor                                     |
| Gene_Symbol=IGFBP2 Insulin-like growth factor-binding protein 2 precursor                                       |
| Gene_Symbol=IGFBP3 Insulin-like growth factor-binding protein 3 precursor                                       |
| Gene_Symbol=IGFBP6 Insulin-like growth factor-binding protein 6 precursor                                       |
| Gene_Symbol=IGFBP7 Insulin-like growth factor-binding protein 7 precursor                                       |
| Gene_Symbol=IGFBPL1 Insulin-like growth factor binding protein-like 1                                           |
| Gene_Symbol=IL6 Interleukin-6 precursor                                                                         |
| Gene_Symbol=IL6ST Isoform 1 of Interleukin-6 receptor subunit beta precursor                                    |
| Gene_Symbol=ILF2 Interleukin enhancer-binding factor 2                                                          |
| Gene_Symbol=ILF3 Isoform 1 of Interleukin enhancer-binding factor 3                                             |
| Gene_Symbol=IMPDH2 Inosine-5'-monophosphate dehydrogenase 2                                                     |
| Gene_Symbol=IQGAP1 Ras GTPase-activating-like protein IQGAP1                                                    |
| Gene_Symbol=ITGB4BP Eukaryotic translation initiation factor 6                                                  |
| Gene_Symbol=ITGBL1 Ten integrin EGF-like repeat domains protein precursor                                       |
| Gene_Symbol=ITM2B Integral membrane protein 2B                                                                  |
| Gene_Symbol=KHDRBS1 Isoform 1 of KH domain-containing, RNA-binding, signal transduction-associated protein 1    |
| Gene_Symbol=KHSRP Far upstream element-binding protein 2                                                        |
| Gene_Symbol=KIAA1822L hypothetical protein LOC79802                                                             |
| Gene_Symbol=KPNA2 Importin alpha-2 subunit                                                                      |
| Gene_Symbol=KPNB1 Importin beta-1 subunit                                                                       |
| Gene_Symbol=KRT16 Keratin, type I cytoskeletal 16                                                               |

|                                                                                                                       |
|-----------------------------------------------------------------------------------------------------------------------|
| Gene_Symbol=KRT19 Keratin, type I cytoskeletal 19                                                                     |
| Gene_Symbol=KYNU Kynureninase                                                                                         |
| Gene_Symbol=L1CAM Isoform 1 of Neural cell adhesion molecule L1 precursor                                             |
| Gene_Symbol=LAMA1 Laminin subunit alpha-1 precursor                                                                   |
| Gene_Symbol=LAMA5 Laminin subunit alpha-5 precursor                                                                   |
| Gene_Symbol=LAMB1 Laminin subunit beta-1 precursor                                                                    |
| Gene_Symbol=LAMB2 Laminin subunit beta-2 precursor                                                                    |
| Gene_Symbol=LAMC1 Laminin subunit gamma-1 precursor                                                                   |
| Gene_Symbol=LCN1 Lipocalin-1 precursor                                                                                |
| Gene_Symbol=LDHA Isoform 1 of L-lactate dehydrogenase A chain                                                         |
| Gene_Symbol=LDHB L-lactate dehydrogenase B chain                                                                      |
| Gene_Symbol=LDLR Low-density lipoprotein receptor precursor                                                           |
| Gene_Symbol=LEPRE1 Isoform 3 of Prolyl 3-hydroxylase 1 precursor                                                      |
| Gene_Symbol=LGALS1 Galectin-1                                                                                         |
| Gene_Symbol=LGALS3 Galectin-3                                                                                         |
| Gene_Symbol=LGALS3BP Galectin-3-binding protein precursor                                                             |
| Gene_Symbol=LGMN Legumain precursor                                                                                   |
| Gene_Symbol=LIPA Isoform 1 of Lysosomal acid lipase/cholesteryl ester hydrolase precursor                             |
| Gene_Symbol=LIPG Isoform 1 of Endothelial lipase precursor                                                            |
| Gene_Symbol=LMAN1 ERGIC-53 protein precursor                                                                          |
| Gene_Symbol=LMAN2 Vesicular integral-membrane protein VIP36 precursor                                                 |
| Gene_Symbol=LMNA Isoform A of Lamin-A/C                                                                               |
| Gene_Symbol=LMNB1 Lamin-B1                                                                                            |
| Gene_Symbol=LOC389842 similar to Ran-specific GTPase-activating protein                                               |
| Gene_Symbol=LOC440055 similar to ribosomal protein S12                                                                |
| Gene_Symbol=LOC653269 similar to Prostate, ovary, testis expressed protein on chromosome 2 isoform 2                  |
| Gene_Symbol=LOC728641;FABP5;LOC731043 Fatty acid-binding protein, epidermal                                           |
| Gene_Symbol=LOXL2 Lysyl oxidase-like 2 variant                                                                        |
| Gene_Symbol=LRP11 Isoform 1 of Low-density lipoprotein receptor-related protein 11 precursor                          |
| Gene_Symbol=LRP8 Isoform 1 of Low-density lipoprotein receptor-related protein 8 precursor                            |
| Gene_Symbol=LTA4H Isoform 1 of Leukotriene A-4 hydrolase                                                              |
| Gene_Symbol=LTB4DH NADP-dependent leukotriene B4 12-hydroxydehydrogenase                                              |
| Gene_Symbol=LTBP3 Isoform 1 of Latent-transforming growth factor beta-binding protein 3 precursor                     |
| Gene_Symbol=LTBP4 latent transforming growth factor beta binding protein 4 isoform c                                  |
| Gene_Symbol=LUC7L2 Isoform 2 of Putative RNA-binding protein Luc7-like 2                                              |
| Gene_Symbol=LUM Lumican precursor                                                                                     |
| Gene_Symbol=LYPLA3 1-O-acylceramide synthase precursor                                                                |
| Gene_Symbol=MAN1B1 Endoplasmic reticulum mannosyl-oligosaccharide 1,2-alpha-mannosidase                               |
| Gene_Symbol=MAN2A1 Alpha-mannosidase 2                                                                                |
| Gene_Symbol=MAP1B Microtubule-associated protein 1B                                                                   |
| Gene_Symbol=MAPRE1 Microtubule-associated protein RP/EB family member 1                                               |
| Gene_Symbol=MAT2A S-adenosylmethionine synthetase isoform type-2                                                      |
| Gene_Symbol=MATN3 Matrilin-3 precursor                                                                                |
| Gene_Symbol=MATR3 Matrin-3                                                                                            |
| Gene_Symbol=MCAM Isoform 1 of Cell surface glycoprotein MUC18 precursor                                               |
| Gene_Symbol=MDH1 Malate dehydrogenase, cytoplasmic                                                                    |
| Gene_Symbol=MDH2 Malate dehydrogenase, mitochondrial precursor                                                        |
| Gene_Symbol=MDK Midkine precursor                                                                                     |
| Gene_Symbol=ME1 NADP-dependent malic enzyme                                                                           |
| Gene_Symbol=MESDC2 Mesoderm development candidate 2                                                                   |
| Gene_Symbol=MET Isoform 1 of Hepatocyte growth factor receptor precursor                                              |
| Gene_Symbol=METAP2 CDNA FLJ34411 fis, clone HEART2002220, highly similar to METHIONINE AMINOPEPTIDASE 2               |
| Gene_Symbol=MFGE8 Lactadherin precursor                                                                               |
| Gene_Symbol=MGAT2 Alpha-1,6-mannosyl-glycoprotein 2-beta-N-acetylglucosaminyltransferase                              |
| Gene_Symbol=MGAT4B mannosyl (alpha-1,3-)-glycoprotein beta-1,4-N-acetylglucosaminyltransferase, isoenzyme B isoform 2 |
| Gene_Symbol=MGAT5 Alpha-1,6-mannosylglycoprotein 6-beta-N-acetylglucosaminyltransferase V                             |
| Gene_Symbol=MIF Macrophage migration inhibitory factor                                                                |
| Gene_Symbol=MINPP1 Isoform 1 of Multiple inositol polyphosphate phosphatase 1 precursor                               |
| Gene_Symbol=MKI67 Isoform Long of Antigen KI-67                                                                       |
| Gene_Symbol=MMP1 Interstitial collagenase precursor                                                                   |
| Gene_Symbol=MMP10 Stromelysin-2 precursor                                                                             |
| Gene_Symbol=MRLC2 Myosin regulatory light chain                                                                       |
| Gene_Symbol=MSN Moesin                                                                                                |

|                                                                                                     |
|-----------------------------------------------------------------------------------------------------|
| Gene_Symbol=MTAP S-methyl-5-thioadenosine phosphorylase                                             |
| Gene_Symbol=MTPN Myotrophin                                                                         |
| Gene_Symbol=MYH9 Myosin-9                                                                           |
| Gene_Symbol=MYL6 Isoform Smooth muscle of Myosin light polypeptide 6                                |
| Gene_Symbol=NACA Similar to Nascent polypeptide associated complex alpha subunit                    |
| Gene_Symbol=NAGLU Alpha-N-acetylglucosaminidase precursor                                           |
| Gene_Symbol=NAP1L1 Nucleosome assembly protein 1-like 1                                             |
| Gene_Symbol=NASP Isoform 1 of Nuclear autoantigenic sperm protein                                   |
| Gene_Symbol=NCAM1 Neural cell adhesion molecule 1, 120 kDa isoform variant (Fragment)               |
| Gene_Symbol=NCBP1 Nuclear cap-binding protein subunit 1                                             |
| Gene_Symbol=NCL Isoform 2 of Nucleolin                                                              |
| Gene_Symbol=NEDD8 NEDD8 precursor                                                                   |
| Gene_Symbol=NENF Neudessin precursor                                                                |
| Gene_Symbol=NID2 Nidogen-2 precursor                                                                |
| Gene_Symbol=NME2;NME1;NME1-NME2 NME1-NME2 protein                                                   |
| Gene_Symbol=NOMO1 Nodal modulator 1 precursor                                                       |
| Gene_Symbol=NONO Non-POU domain-containing octamer-binding protein                                  |
| Gene_Symbol=NOTCH3 Neurogenic locus notch homolog protein 3 precursor                               |
| Gene_Symbol=NOV Protein NOV homolog precursor                                                       |
| Gene_Symbol=NP CDNA FLJ25678 fis, clone TST04067, highly similar to PURINE NUCLEOSIDE PHOSPHORYLASE |
| Gene_Symbol=NPC2 Epididymal secretory protein E1 precursor                                          |
| Gene_Symbol=NPEPPS Puromycin-sensitive aminopeptidase                                               |
| Gene_Symbol=NPM1 Isoform 2 of Nucleophosmin                                                         |
| Gene_Symbol=NQO1 Hypothetical protein (Fragment)                                                    |
| Gene_Symbol=NRCAM Isoform 3 of Neuronal cell adhesion molecule precursor                            |
| Gene_Symbol=NRP1 Muscle type neuropilin 1                                                           |
| Gene_Symbol=NSFL1C Isoform 1 of NSFL1 cofactor p47                                                  |
| Gene_Symbol=NTN4 Isoform 3 of Netrin-4 precursor                                                    |
| Gene_Symbol=NUCB1 Nucleobindin-1 precursor                                                          |
| Gene_Symbol=NUCB2 Nucleobindin-2 precursor                                                          |
| Gene_Symbol=NUDC Nuclear migration protein nudC                                                     |
| Gene_Symbol=NUDT21 Cleavage and polyadenylation specificity factor 5                                |
| Gene_Symbol=NUTF2 Nuclear transport factor 2                                                        |
| Gene_Symbol=OAF Protein OAF homolog                                                                 |
| Gene_Symbol=OLFM1 Isoform 1 of Noelin precursor                                                     |
| Gene_Symbol=OLFML2A CDNA FLJ90228 fis, clone NT2RM2000241 (Fragment)                                |
| Gene_Symbol=OLFML2A olfactomedin-like 2A                                                            |
| Gene_Symbol=OS9 Isoform OS-9-2 of Protein OS-9 precursor                                            |
| Gene_Symbol=OS9 Isoform OS-9-3 of Protein OS-9 precursor                                            |
| Gene_Symbol=P4HA1 Isoform 1 of Prolyl 4-hydroxylase subunit alpha-1 precursor                       |
| Gene_Symbol=P4HB Protein disulfide-isomerase precursor                                              |
| Gene_Symbol=P704P similar to actin-like protein                                                     |
| Gene_Symbol=PA2G4 Proliferation-associated protein 2G4                                              |
| Gene_Symbol=PABPC1 70 kDa protein                                                                   |
| Gene_Symbol=PAICS Multifunctional protein ADE2                                                      |
| Gene_Symbol=PAM Isoform 1 of Peptidyl-glycine alpha-amidating monooxygenase precursor               |
| Gene_Symbol=PAPPA Pappalysin-1 precursor                                                            |
| Gene_Symbol=PARK7 Protein DJ-1                                                                      |
| Gene_Symbol=PARP1 Poly [ADP-ribose] polymerase 1                                                    |
| Gene_Symbol=PBEF1 Isoform 1 of Nicotinamide phosphoribosyltransferase                               |
| Gene_Symbol=PCBP1 Poly(rC)-binding protein 1                                                        |
| Gene_Symbol=PCBP2 poly(rC)-binding protein 2 isoform b                                              |
| Gene_Symbol=PCMT1 Protein-L-isoaspartate (D-aspartate) O-methyltransferase                          |
| Gene_Symbol=PCNA Proliferating cell nuclear antigen                                                 |
| Gene_Symbol=PCOLCE2 Procollagen C-endopeptidase enhancer 2 precursor                                |
| Gene_Symbol=PCK1N ProSAAS precursor                                                                 |
| Gene_Symbol=PCK5 Proprotein convertase subtilisin/kexin type 5                                      |
| Gene_Symbol=PDAP1 28 kDa heat- and acid-stable phosphoprotein                                       |
| Gene_Symbol=PDCD6 Programmed cell death protein 6                                                   |
| Gene_Symbol=PDCD6IP PDCD6IP protein                                                                 |
| Gene_Symbol=PDGFC platelet-derived growth factor C precursor                                        |
| Gene_Symbol=PDGFRL Platelet-derived growth factor receptor-like protein precursor                   |
| Gene_Symbol=PDIA3 Protein disulfide-isomerase A3 precursor                                          |



|                                                                                            |
|--------------------------------------------------------------------------------------------|
| Gene_Symbol=PDIA4 Protein disulfide-isomerase A4 precursor                                 |
| Gene_Symbol=PDIA6 Isoform 2 of Protein disulfide-isomerase A6 precursor                    |
| Gene_Symbol=PDLIM5 PDZ and LIM domain protein 5                                            |
| Gene_Symbol=PEBP1 Phosphatidylethanolamine-binding protein 1                               |
| Gene_Symbol=PFDN2 Prefoldin subunit 2                                                      |
| Gene_Symbol=PFDN4 Prefoldin subunit 4                                                      |
| Gene_Symbol=PFBP Phosphofructokinase, platelet                                             |
| Gene_Symbol=PFN1 Profilin-1                                                                |
| Gene_Symbol=PGD 6-phosphogluconate dehydrogenase, decarboxylating                          |
| Gene_Symbol=PGK1 Phosphoglycerate kinase 1                                                 |
| Gene_Symbol=PGM2 Phosphoglucomutase-2                                                      |
| Gene_Symbol=PGRMC1 Membrane-associated progesterone receptor component 1                   |
| Gene_Symbol=PIR Pirin                                                                      |
| Gene_Symbol=PKM2 Isoform M2 of Pyruvate kinase isozymes M1/M2                              |
| Gene_Symbol=PLA2G7 Platelet-activating factor acetylhydrolase precursor                    |
| Gene_Symbol=PLAT Isoform 1 of Tissue-type plasminogen activator precursor                  |
| Gene_Symbol=PLEC1 Isoform 1 of Plectin-1                                                   |
| Gene_Symbol=PLOD1 Procollagen-lysine,2-oxoglutarate 5-dioxygenase 1 precursor              |
| Gene_Symbol=PLOD2 Isoform 2 of Procollagen-lysine,2-oxoglutarate 5-dioxygenase 2 precursor |
| Gene_Symbol=PLOD3 Procollagen-lysine,2-oxoglutarate 5-dioxygenase 3 precursor              |
| Gene_Symbol=PLS3 plastin 3                                                                 |
| Gene_Symbol=PLTP Isoform 1 of Phospholipid transfer protein precursor                      |
| Gene_Symbol=PPA1 Inorganic pyrophosphatase                                                 |
| Gene_Symbol=PPIA;LOC654188;LOC653214 Peptidyl-prolyl cis-trans isomerase A                 |
| Gene_Symbol=PPIB peptidylprolyl isomerase B precursor                                      |
| Gene_Symbol=PPIF Peptidyl-prolyl cis-trans isomerase, mitochondrial precursor              |
| Gene_Symbol=PPP1R14B Similar to Protein phosphatase 1 regulatory subunit 14B               |
| Gene_Symbol=PPP2R1A alpha isoform of regulatory subunit A, protein phosphatase 2           |
| Gene_Symbol=PPT1 Palmitoyl-protein thioesterase 1 precursor                                |
| Gene_Symbol=PRCP prolylcarboxypeptidase isoform 2 preproprotein                            |
| Gene_Symbol=PRDX1 Peroxiredoxin-1                                                          |
| Gene_Symbol=PRDX2 Peroxiredoxin-2                                                          |
| Gene_Symbol=PRDX3 Thioredoxin-dependent peroxide reductase, mitochondrial precursor        |
| Gene_Symbol=PRDX4 Peroxiredoxin-4                                                          |
| Gene_Symbol=PRDX6 Peroxiredoxin-6                                                          |
| Gene_Symbol=PRKCSH Glucosidase 2 subunit beta precursor                                    |
| Gene_Symbol=PRMT5 protein arginine methyltransferase 5 isoform b                           |
| Gene_Symbol=PROCR Endothelial protein C receptor precursor                                 |
| Gene_Symbol=PROS1 Vitamin K-dependent protein S precursor                                  |
| Gene_Symbol=PRPF19 Pre-mRNA-processing factor 19                                           |
| Gene_Symbol=PRSS23 Serine protease 23 precursor                                            |
| Gene_Symbol=PSAP Isoform Sap-mu-9 of Proactivator polypeptide precursor                    |
| Gene_Symbol=PSAT1 Isoform 1 of Phosphoserine aminotransferase                              |
| Gene_Symbol=PSMA1 Isoform Short of Proteasome subunit alpha type 1                         |
| Gene_Symbol=PSMA2 Proteasome subunit alpha type 2                                          |
| Gene_Symbol=PSMA5 Proteasome subunit alpha type 5                                          |
| Gene_Symbol=PSMA6 Proteasome subunit alpha type 6                                          |
| Gene_Symbol=PSMA7 Isoform 2 of Proteasome subunit alpha type 7                             |
| Gene_Symbol=PSMB1 Proteasome subunit beta type 1 precursor                                 |
| Gene_Symbol=PSMB2 Proteasome subunit beta type 2                                           |
| Gene_Symbol=PSMB3 Proteasome subunit beta type 3                                           |
| Gene_Symbol=PSMB4 Proteasome subunit beta type 4 precursor                                 |
| Gene_Symbol=PSMB7 Proteasome subunit beta type 7 precursor                                 |
| Gene_Symbol=PSMD1 Isoform 1 of 26S proteasome non-ATPase regulatory subunit 1              |
| Gene_Symbol=PSMD11 Proteasome 26S non-ATPase subunit 11 variant (Fragment)                 |
| Gene_Symbol=PSME1 Proteasome activator complex subunit 1                                   |
| Gene_Symbol=PSME2 Proteasome activator complex subunit 2                                   |
| Gene_Symbol=PTBP1 Isoform 1 of Polypyrimidine tract-binding protein 1                      |
| Gene_Symbol=PTGES3 15 kDa protein                                                          |
| Gene_Symbol=PTGFRN Prostaglandin F2 receptor negative regulator precursor                  |
| Gene_Symbol=PTPRF Receptor-type tyrosine-protein phosphatase F precursor                   |
| Gene_Symbol=PTX3 Pentraxin-related protein PTX3 precursor                                  |
| Gene_Symbol=PVR Isoform Gamma of Poliovirus receptor precursor                             |

|                                                                                                                         |
|-------------------------------------------------------------------------------------------------------------------------|
| Gene_Symbol=PXDN similar to peroxidasin                                                                                 |
| Gene_Symbol=PYGB Glycogen phosphorylase, brain form                                                                     |
| Gene_Symbol=PYGL Glycogen phosphorylase, liver form                                                                     |
| Gene_Symbol=QPCT Glutaminyl-peptide cyclotransferase precursor                                                          |
| Gene_Symbol=QSCN6 Isoform 1 of Sulfhydryl oxidase 1 precursor                                                           |
| Gene_Symbol=QSCN6L1 78 kDa protein                                                                                      |
| Gene_Symbol=RAD23B UV excision repair protein RAD23 homolog B                                                           |
| Gene_Symbol=RAN GTP-binding nuclear protein Ran                                                                         |
| Gene_Symbol=RBBP7 Retinoblastoma binding protein 7                                                                      |
| Gene_Symbol=RBM3 Putative RNA-binding protein 3                                                                         |
| Gene_Symbol=RBMX Heterogeneous nuclear ribonucleoprotein G                                                              |
| Gene_Symbol=RCC1 regulator of chromosome condensation 1 isoform a                                                       |
| Gene_Symbol=RHOA Transforming protein RhoA precursor                                                                    |
| Gene_Symbol=RNASE4 Ribonuclease 4 precursor                                                                             |
| Gene_Symbol=RNASE4;ANG Angiogenin precursor                                                                             |
| Gene_Symbol=RNASET2 Isoform 1 of Ribonuclease T2 precursor                                                              |
| Gene_Symbol=RNPEP Aminopeptidase B                                                                                      |
| Gene_Symbol=RPL10A 60S ribosomal protein L10a                                                                           |
| Gene_Symbol=RPL12 60S ribosomal protein L12                                                                             |
| Gene_Symbol=RPLP0 60S acidic ribosomal protein P0                                                                       |
| Gene_Symbol=RPLP1;hCG_1641617 60S acidic ribosomal protein P1                                                           |
| Gene_Symbol=RPLP2 60S acidic ribosomal protein P2                                                                       |
| Gene_Symbol=RPS12 40S ribosomal protein S12                                                                             |
| Gene_Symbol=RPS21 40S ribosomal protein S21                                                                             |
| Gene_Symbol=RPS3 40S ribosomal protein S3                                                                               |
| Gene_Symbol=RPS4X 40S ribosomal protein S4, X isoform                                                                   |
| Gene_Symbol=RPS7 40S ribosomal protein S7                                                                               |
| Gene_Symbol=RPSA;LOC388524 Ribosomal protein SA                                                                         |
| Gene_Symbol=RRBP1 Isoform 3 of Ribosome-binding protein 1                                                               |
| Gene_Symbol=S100A11 Protein S100-A11                                                                                    |
| Gene_Symbol=SCPEP1 Isoform 1 of Retinoid-inducible serine carboxypeptidase precursor                                    |
| Gene_Symbol=SCUBE1 Signal peptide, CUB and EGF-like domain-containing protein 1 precursor                               |
| Gene_Symbol=SDCBP Syntenin-1                                                                                            |
| Gene_Symbol=SDF4 45 kDa calcium-binding protein precursor                                                               |
| Gene_Symbol=SECTM1 Secreted and transmembrane protein 1 precursor                                                       |
| Gene_Symbol=SEMA3A Semaphorin-3A precursor                                                                              |
| Gene_Symbol=SEMA3D Semaphorin-3D precursor                                                                              |
| Gene_Symbol=SEMA3E Semaphorin-3E precursor                                                                              |
| Gene_Symbol=SEPT2 Septin-2                                                                                              |
| Gene_Symbol=SEPT9 Isoform 5 of Septin-9                                                                                 |
| Gene_Symbol=SERBP1 Isoform 1 of Plasminogen activator inhibitor 1 RNA-binding protein                                   |
| Gene_Symbol=SERPINB2 Plasminogen activator inhibitor 2 precursor                                                        |
| Gene_Symbol=SERPINB5 Serpin B5 precursor                                                                                |
| Gene_Symbol=SERPINB9 Serpin B9                                                                                          |
| Gene_Symbol=SERPINE2 Glia-derived nexin precursor                                                                       |
| Gene_Symbol=SET Isoform 1 of Protein SET                                                                                |
| Gene_Symbol=SF3A1 Splicing factor 3 subunit 1                                                                           |
| Gene_Symbol=SF3A3 Splicing factor 3A subunit 3                                                                          |
| Gene_Symbol=SF3B1 Splicing factor 3B subunit 1                                                                          |
| Gene_Symbol=SF3B4 Splicing factor 3B subunit 4                                                                          |
| Gene_Symbol=SFN Isoform 1 of 14-3-3 protein sigma                                                                       |
| Gene_Symbol=SFPQ Isoform Long of Splicing factor, proline- and glutamine-rich                                           |
| Gene_Symbol=SFRS7 Isoform 1 of Splicing factor, arginine/serine-rich 7                                                  |
| Gene_Symbol=SHH Sonic hedgehog protein precursor                                                                        |
| Gene_Symbol=SIAE Isoform 1 of Sialate O-acetyltransferase precursor                                                     |
| Gene_Symbol=SIL1 Nucleotide exchange factor SIL1 precursor                                                              |
| Gene_Symbol=SKIV2L2 Superkiller viralicidic activity 2-like 2                                                           |
| Gene_Symbol=SKP1A Isoform 1 of S-phase kinase-associated protein 1A                                                     |
| Gene_Symbol=SLC2A1 Solute carrier family 2, facilitated glucose transporter member 1                                    |
| Gene_Symbol=SLC3A2 solute carrier family 3 (activators of dibasic and neutral amino acid transport), member 2 isoform d |
| Gene_Symbol=SLC44A1 Isoform 1 of Choline transporter-like protein 1                                                     |
| Gene_Symbol=SLPI Antileukoproteinase precursor                                                                          |
| Gene_Symbol=SMOC1 Isoform 1 of SPARC-related modular calcium-binding protein 1 precursor                                |

|                                                                                                 |
|-------------------------------------------------------------------------------------------------|
| Gene_Symbol=SND1 Staphylococcal nuclease domain-containing protein 1                            |
| Gene_Symbol=SNRPB Isoform SM-B' of Small nuclear ribonucleoprotein-associated proteins B and B' |
| Gene_Symbol=SNRPD1 Small nuclear ribonucleoprotein Sm D1                                        |
| Gene_Symbol=SNRPD3 Small nuclear ribonucleoprotein Sm D3                                        |
| Gene_Symbol=SOD1 16 kDa protein                                                                 |
| Gene_Symbol=SPOCK1 Testican-1 precursor                                                         |
| Gene_Symbol=SPP1 Isoform A of Osteopontin precursor                                             |
| Gene_Symbol=SPTAN1 Isoform 1 of Spectrin alpha chain, brain                                     |
| Gene_Symbol=SPTBN1 Isoform Long of Spectrin beta chain, brain 1                                 |
| Gene_Symbol=SQSTM1 Isoform 1 of Sequestosome-1                                                  |
| Gene_Symbol=SRGN Secretory granule proteoglycan core protein precursor                          |
| Gene_Symbol=SRPX Isoform 1 of Sushi repeat-containing protein SRPX precursor                    |
| Gene_Symbol=SRPX2 Sushi repeat-containing protein SRPX2 precursor                               |
| Gene_Symbol=SRXN1;SCRT2 Sulfiredoxin-1                                                          |
| Gene_Symbol=SSB Lupus La protein                                                                |
| Gene_Symbol=SSRP1 FACT complex subunit SSRP1                                                    |
| Gene_Symbol=ST13 Hsc70-interacting protein                                                      |
| Gene_Symbol=ST3GAL1 CMP-N-acetylneuraminate-beta-galactosamide-alpha-2,3-sialyltransferase      |
| Gene_Symbol=ST8SIA4 CMP-N-acetylneuraminate-poly-alpha-2,8-sialyltransferase                    |
| Gene_Symbol=STC1 Stanniocalcin-1 precursor                                                      |
| Gene_Symbol=STC2 Stanniocalcin-2 precursor                                                      |
| Gene_Symbol=STCH Stress 70 protein chaperone microsomal-associated 60 kDa protein precursor     |
| Gene_Symbol=STIP1 Stress-induced-phosphoprotein 1                                               |
| Gene_Symbol=STMN1 Stathmin 1                                                                    |
| Gene_Symbol=SUMF2 Isoform 1 of Sulfatase-modifying factor 2 precursor                           |
| Gene_Symbol=SYNCRIP Isoform 1 of Heterogeneous nuclear ribonucleoprotein Q                      |
| Gene_Symbol=TAF15 Isoform Short of TATA-binding protein-associated factor 2N                    |
| Gene_Symbol=TAGLN2;CCDC19 24 kDa protein                                                        |
| Gene_Symbol=TALDO1 Transaldolase                                                                |
| Gene_Symbol=TARS Threonyl-tRNA synthetase, cytoplasmic                                          |
| Gene_Symbol=TBCA Tubulin-specific chaperone A                                                   |
| Gene_Symbol=TCERG1 Transcription elongation regulator 1                                         |
| Gene_Symbol=TCP1 T-complex protein 1 subunit alpha                                              |
| Gene_Symbol=TFPI Isoform Alpha of Tissue factor pathway inhibitor precursor                     |
| Gene_Symbol=TFPI2 Tissue factor pathway inhibitor 2 precursor                                   |
| Gene_Symbol=TFRC Transferrin receptor protein 1                                                 |
| Gene_Symbol=TGFB1 Transforming growth factor beta-1 precursor                                   |
| Gene_Symbol=TGFB2 Isoform A of Transforming growth factor beta-2 precursor                      |
| Gene_Symbol=TGFB3 Transforming growth factor-beta-induced protein ig-h3 precursor               |
| Gene_Symbol=THBS3 Thrombospondin-3 precursor                                                    |
| Gene_Symbol=THOC4 THO complex subunit 4                                                         |
| Gene_Symbol=TIMP1 Metalloproteinase inhibitor 1 precursor                                       |
| Gene_Symbol=TIMP2 22 kDa protein                                                                |
| Gene_Symbol=TKT Transketolase                                                                   |
| Gene_Symbol=TMPO Lamina-associated polypeptide 2 isoform alpha                                  |
| Gene_Symbol=TNFRSF11B Tumor necrosis factor receptor superfamily member 11B precursor           |
| Gene_Symbol=TNPO1 Transportin 1 (Importin beta-)-2                                              |
| Gene_Symbol=TOR1B Torsin B precursor                                                            |
| Gene_Symbol=TOR3A Isoform 1 of Torsin-3A precursor                                              |
| Gene_Symbol=TPI1 Triosephosphate isomerase 1 variant                                            |
| Gene_Symbol=TPM3 tropomyosin 3 isoform 4                                                        |
| Gene_Symbol=TPM4 Isoform 1 of Tropomyosin alpha-4 chain                                         |
| Gene_Symbol=TPR Nucleoprotein TPR                                                               |
| Gene_Symbol=TPT1 Tumor protein, translationally-controlled 1                                    |
| Gene_Symbol=TRAP1 Heat shock protein 75 kDa, mitochondrial precursor                            |
| Gene_Symbol=TRIM28 Isoform 1 of Transcription intermediary factor 1-beta                        |
| Gene_Symbol=TSKU Tsukushi precursor                                                             |
| Gene_Symbol=TUBA1B 46 kDa protein                                                               |
| Gene_Symbol=TUBB Tubulin beta chain                                                             |
| Gene_Symbol=TUBB2C Tubulin beta-2C chain                                                        |
| Gene_Symbol=TXN Thioredoxin                                                                     |
| Gene_Symbol=TXNDC12 Thioredoxin domain-containing protein 12 precursor                          |
| Gene_Symbol=TXNDC4 Thioredoxin domain-containing protein 4 precursor                            |

|                                                                                                   |
|---------------------------------------------------------------------------------------------------|
| Gene_Symbol=TXNL2 Thioredoxin-like protein 2                                                      |
| Gene_Symbol=TXNRD1 CDNA FLJ46672 fis, clone TRACH3009008, highly similar to Thioredoxin reductase |
| Gene_Symbol=U2AF2 54 kDa protein                                                                  |
| Gene_Symbol=UBA52 ubiquitin and ribosomal protein L40 precursor                                   |
| Gene_Symbol=UBE1 Ubiquitin-activating enzyme E1                                                   |
| Gene_Symbol=UBE2L3 Ubiquitin-conjugating enzyme E2 L3                                             |
| Gene_Symbol=UBE2N Ubiquitin-conjugating enzyme E2 N                                               |
| Gene_Symbol=UCHL1 Ubiquitin carboxyl-terminal hydrolase isozyme L1                                |
| Gene_Symbol=UCHL5 Isoform 2 of Ubiquitin carboxyl-terminal hydrolase isozyme L5                   |
| Gene_Symbol=UGCGL1 UDP-glucose ceramide glucosyltransferase-like 1 isoform 1                      |
| Gene_Symbol=UGDH UDP-glucose 6-dehydrogenase                                                      |
| Gene_Symbol=UXS1 Isoform 2 of UDP-glucuronic acid decarboxylase 1                                 |
| Gene_Symbol=VARS Valyl-tRNA synthetase                                                            |
| Gene_Symbol=VASN Vasorin precursor                                                                |
| Gene_Symbol=VCL Isoform 2 of Vinculin                                                             |
| Gene_Symbol=VCP Transitional endoplasmic reticulum ATPase                                         |
| Gene_Symbol=VEGFC Vascular endothelial growth factor C precursor                                  |
| Gene_Symbol=VGF VGF nerve growth factor inducible precursor                                       |
| Gene_Symbol=VIL2 Ezrin                                                                            |
| Gene_Symbol=VIM Vimentin                                                                          |
| Gene_Symbol=VIT Hypothetical protein VIT                                                          |
| Gene_Symbol=VPS35 Vacuolar protein sorting-associated protein 35                                  |
| Gene_Symbol=VWA1 von Willebrand factor A domain-related protein isoform 1                         |
| Gene_Symbol=WARS tryptophanyl-tRNA synthetase isoform b                                           |
| Gene_Symbol=WISP2 WNT1-inducible-signaling pathway protein 2 precursor                            |
| Gene_Symbol=XPO1 Exportin-1                                                                       |
| Gene_Symbol=XRCC5 ATP-dependent DNA helicase 2 subunit 2                                          |
| Gene_Symbol=XRCC6 70 kDa protein                                                                  |
| Gene_Symbol=XTP3TPA CDNA: FLJ21190 fis, clone CAS12333                                            |
| Gene_Symbol=XYLT1 Xylosyltransferase 1                                                            |
| Gene_Symbol=YBX1 Nuclease sensitive element binding protein-1                                     |
| Gene_Symbol=YWHAB Isoform Long of 14-3-3 protein beta/alpha                                       |
| Gene_Symbol=YWHAE 14-3-3 protein epsilon                                                          |
| Gene_Symbol=YWHAG 14-3-3 protein gamma                                                            |
| Gene_Symbol=YWHAQ 14-3-3 protein theta                                                            |
| Gene_Symbol=YWHAZ 14-3-3 protein zeta/delta                                                       |

**the CM of the 3 replicates (Rep1-3) of H460 from Mascot and X! Tan**

| Number of simil | Accession numbers                               | Protein molecular wei | H460-Rep1 (HTB177-Forv |
|-----------------|-------------------------------------------------|-----------------------|------------------------|
| 1               | IPI00797738                                     | 12017.4               | 100%                   |
| 1               | IPI00455527                                     | 26990.8               | 0                      |
| 1               | IPI00555602                                     | 42400.1               | 100%                   |
| 1               | IPI00419827                                     | 50512.6               | 100%                   |
| 2               | IPI00382617,IPI00477150                         | 31463.9               | 100%                   |
| 2               | IPI00063827,IPI00747859                         | 22328                 | 0                      |
| 1               | IPI00021290                                     | 120824.8              | 0                      |
| 2               | IPI00021428,IPI00023006                         | 42034.1               | 100%                   |
| 1               | IPI00021440                                     | 41775.9               | 100%                   |
| 1               | IPI00013508                                     | 103043.1              | 100%                   |
| 1               | IPI00013808                                     | 104839.2              | 100%                   |
| 3               | IPI00005159,IPI00470573,IPI00749250             | 44743.7               | 0                      |
| 1               | IPI00013897                                     | 84125                 | 100%                   |
| 1               | IPI00420067                                     | 90302                 | 100%                   |
| 2               | IPI00029606,IPI00288894                         | 78525.4               | 100%                   |
| 2               | IPI00011901,IPI00249735                         | 105020.9              | 100%                   |
| 1               | IPI00021903                                     | 91908.2               | 100%                   |
| 3               | IPI00440932,IPI00440933,IPI00747759             | 90722.5               | 100%                   |
| 1               | IPI00005908                                     | 105339.7              | 100%                   |
| 1               | IPI00007427                                     | 22220.9               | 100%                   |
| 1               | IPI00374563                                     | 214820                | 100%                   |
| 1               | IPI00012007                                     | 47699.1               | 100%                   |
| 1               | IPI00555610                                     | 312519.1              | 100%                   |
| 1               | IPI00030706                                     | 38256.4               | 55%                    |
| 1               | IPI00413641                                     | 35835.9               | 100%                   |
| 1               | IPI00105407                                     | 36003.4               | 100%                   |
| 1               | IPI00029733                                     | 36771.1               | 0                      |
| 1               | IPI00005668                                     | 36717.9               | 100%                   |
| 1               | IPI00291483                                     | 36827.1               | 100%                   |
| 4               | IPI00015102,IPI00783803,IPI00795504,IPI00807403 | 65085.8               | 100%                   |
| 4               | IPI00296183,IPI00654709,IPI00795549,IPI00796116 | 50361.7               | 100%                   |
| 1               | IPI00465439                                     | 39402.6               | 100%                   |
| 1               | IPI00022426                                     | 38981.6               | 100%                   |
| 1               | IPI00153060                                     | 45196                 | 100%                   |
| 2               | IPI00025849,IPI00449263                         | 28568.1               | 100%                   |
| 2               | IPI00007423,IPI00759824                         | 28770.6               | 100%                   |
| 2               | IPI00165393,IPI00640833                         | 30675.3               | 55%                    |
| 1               | IPI00030431                                     | 62772.6               | 100%                   |
| 1               | IPI00218918                                     | 38697.9               | 100%                   |
| 1               | IPI00418169                                     | 40395.3               | 100%                   |
| 1               | IPI00329801                                     | 35920.6               | 100%                   |
| 1               | IPI00215911                                     | 35537.7               | 100%                   |
| 1               | IPI00031030                                     | 86937                 | 100%                   |
| 1               | IPI00514157                                     | 26668.3               | 100%                   |
| 1               | IPI00006608                                     | 86923.3               | 100%                   |
| 2               | IPI00215914,IPI00215917                         | 20679.6               | 100%                   |
| 1               | IPI00796541                                     | 25813.2               | 100%                   |
| 1               | IPI00003327                                     | 20438.3               | 99%                    |
| 1               | IPI00328748                                     | 26886.4               | 100%                   |
| 1               | IPI00418446                                     | 46487.5               | 100%                   |
| 1               | IPI00783284                                     | 85872.6               | 98%                    |
| 1               | IPI00289499                                     | 64598.5               | 100%                   |
| 3               | IPI00020430,IPI00784119,IPI00794988             | 52592.9               | 100%                   |
| 1               | IPI00168884                                     | 38991.1               | 100%                   |
| 1               | IPI00007812                                     | 56484.1               | 0                      |
| 2               | IPI00027235,IPI00478671                         | 158518.3              | 100%                   |
| 2               | IPI00296992,IPI00397361                         | 98317.2               | 100%                   |
| 2               | IPI00004656,IPI00796379                         | 13696.9               | 100%                   |
| 1               | IPI00477470                                     | 37810.1               | 100%                   |
| 1               | IPI00009997                                     | 47101.4               | 100%                   |

|    |                                                             |          |      |
|----|-------------------------------------------------------------|----------|------|
| 1  | IPI00759755                                                 | 42520.2  | 100% |
| 1  | IPI00746600                                                 | 43939.7  | 55%  |
| 1  | IPI00030128                                                 | 40023.9  | 100% |
| 1  | IPI00641582                                                 | 61575.2  | 0    |
| 1  | IPI00299024                                                 | 22675.3  | 100% |
| 1  | IPI00220152                                                 | 36197    | 100% |
| 1  | IPI00025864                                                 | 72867.4  | 0    |
| 1  | IPI00012058                                                 | 27800.3  | 100% |
| 1  | IPI00294158                                                 | 33411    | 100% |
| 1  | IPI00014021                                                 | 82882.5  | 100% |
| 1  | IPI00218042                                                 | 70451.2  | 0    |
| 1  | IPI00301434                                                 | 16914.1  | 100% |
| 1  | IPI00795150                                                 | 46382.3  | 100% |
| 2  | IPI00026240,IPI00657860                                     | 35707.3  | 100% |
| 2  | IPI00218413,IPI00744685                                     | 61115.4  | 100% |
| 1  | IPI00419473                                                 | 17681.4  | 100% |
| 1  | IPI00012236                                                 | 13285.2  | 100% |
| 1  | IPI00056357                                                 | 18776.9  | 100% |
| 1  | IPI00014230                                                 | 31344.6  | 100% |
| 1  | IPI00296165                                                 | 80156.7  | 100% |
| 1  | IPI00017696                                                 | 76666.2  | 100% |
| 2  | IPI00165044,IPI00414183                                     | 58520    | 100% |
| 1  | IPI00395627                                                 | 26192.3  | 100% |
| 3  | IPI00075248,IPI00386621,IPI00794543                         | 16820    | 100% |
| 1  | IPI00020599                                                 | 48124.9  | 100% |
| 1  | IPI00014537                                                 | 37089.6  | 100% |
| 1  | IPI00100160                                                 | 136363.1 | 0    |
| 1  | IPI00103175                                                 | 44822.1  | 100% |
| 1  | IPI00020984                                                 | 67552.2  | 100% |
| 1  | IPI00005969                                                 | 32905.1  | 100% |
| 2  | IPI00218782,IPI00642256                                     | 33764.2  | 99%  |
| 5  | IPI00760715,IPI00761035,IPI00761069,IPI00761140,IPI00761141 | 81153    | 34%  |
| 1  | IPI00295386                                                 | 30356.8  | 100% |
| 1  | IPI00010320                                                 | 21400.1  | 0    |
| 1  | IPI00297579                                                 | 20794    | 100% |
| 1  | IPI00260630                                                 | 108158.4 | 100% |
| 1  | IPI00297779                                                 | 57471.9  | 100% |
| 1  | IPI00302927                                                 | 57908    | 100% |
| 1  | IPI00010720                                                 | 59654.3  | 100% |
| 1  | IPI00018465                                                 | 59349.8  | 100% |
| 2  | IPI00302925,IPI00784090                                     | 59761.2  | 100% |
| 1  | IPI00152540                                                 | 161674.2 | 100% |
| 1  | IPI00029260                                                 | 40058.6  | 55%  |
| 12 | IPI00305064,IPI00418465,IPI00419219,IPI00827555,IPI00827556 | 81535.4  | 55%  |
| 1  | IPI00216550                                                 | 48699.2  | 100% |
| 1  | IPI00031713                                                 | 21100.3  | 100% |
| 1  | IPI00000190                                                 | 25791.8  | 0    |
| 1  | IPI00295399                                                 | 88436.3  | 100% |
| 1  | IPI00293539                                                 | 76523.6  | 100% |
| 1  | IPI00024046                                                 | 78269.6  | 100% |
| 1  | IPI00165972                                                 | 27014.4  | 100% |
| 1  | IPI00029739                                                 | 139052.1 | 100% |
| 1  | IPI00654723                                                 | 22222.5  | 99%  |
| 1  | IPI00012011                                                 | 18485.2  | 100% |
| 1  | IPI00783540                                                 | 31958.5  | 100% |
| 1  | IPI00333010                                                 | 103684.7 | 0    |
| 1  | IPI00746813                                                 | 50670.1  | 100% |
| 1  | IPI00216738                                                 | 61334.5  | 100% |
| 2  | IPI00301185,IPI00306719                                     | 47597.8  | 100% |
| 1  | IPI00783390                                                 | 135011.5 | 100% |
| 1  | IPI00299059                                                 | 136638.3 | 0    |
| 1  | IPI00465319                                                 | 85478.2  | 99%  |
| 3  | IPI00180954,IPI00641579,IPI00646241                         | 18630.3  | 0    |

|   |                                                 |          |      |
|---|-------------------------------------------------|----------|------|
| 1 | IPI00022977                                     | 42627.1  | 100% |
| 1 | IPI00033466                                     | 35676.4  | 100% |
| 1 | IPI00010896                                     | 26905.3  | 55%  |
| 2 | IPI00291930,IPI00397519                         | 68242.5  | 100% |
| 1 | IPI00007257                                     | 108623.5 | 100% |
| 2 | IPI00024067,IPI00455383                         | 191600.9 | 100% |
| 3 | IPI00291262,IPI00400826,IPI00795633             | 52477    | 100% |
| 1 | IPI00430813                                     | 18723.3  | 100% |
| 3 | IPI00165579,IPI00177728,IPI00646632             | 52861.7  | 100% |
| 1 | IPI00029751                                     | 113304.8 | 100% |
| 2 | IPI00012386,IPI00791735                         | 59465.3  | 100% |
| 1 | IPI00743696                                     | 160727.7 | 100% |
| 1 | IPI00306322                                     | 167521.7 | 100% |
| 1 | IPI00472200                                     | 163616.6 | 100% |
| 1 | IPI00477611                                     | 183593.6 | 100% |
| 1 | IPI00748917                                     | 144891.6 | 100% |
| 1 | IPI00291136                                     | 108513   | 100% |
| 1 | IPI00219000                                     | 73437.6  | 100% |
| 1 | IPI00295851                                     | 107128   | 100% |
| 1 | IPI00008453                                     | 53232.3  | 100% |
| 1 | IPI00011062                                     | 164924.7 | 55%  |
| 1 | IPI00301395                                     | 54147.5  | 100% |
| 1 | IPI00021997                                     | 24057    | 100% |
| 1 | IPI00009294                                     | 113716.8 | 100% |
| 1 | IPI00027806                                     | 56869    | 100% |
| 1 | IPI00289561                                     | 46284.2  | 100% |
| 3 | IPI00220959,IPI00748502,IPI00793277             | 46545.5  | 100% |
| 2 | IPI00022744,IPI00219994                         | 110403.9 | 100% |
| 1 | IPI00015881                                     | 60101.4  | 55%  |
| 1 | IPI00442073                                     | 20549.1  | 100% |
| 1 | IPI00032293                                     | 15781.2  | 100% |
| 1 | IPI00021828                                     | 11121.3  | 100% |
| 2 | IPI00007778,IPI00643023                         | 43742.8  | 100% |
| 1 | IPI00020977                                     | 38072.7  | 100% |
| 1 | IPI00791457                                     | 61841.2  | 100% |
| 1 | IPI00295741                                     | 37803.2  | 100% |
| 1 | IPI00022810                                     | 51824.3  | 100% |
| 1 | IPI00011229                                     | 44535    | 100% |
| 1 | IPI00012887                                     | 37546.1  | 100% |
| 1 | IPI00002745                                     | 33850.2  | 100% |
| 1 | IPI00554634                                     | 19098.1  | 100% |
| 1 | IPI00013874                                     | 11283.7  | 100% |
| 1 | IPI00292936                                     | 11954.5  | 100% |
| 1 | IPI00465315                                     | 11731.4  | 100% |
| 1 | IPI00299219                                     | 42008    | 100% |
| 1 | IPI00044326                                     | 42980    | 100% |
| 1 | IPI00028911                                     | 97563.3  | 100% |
| 3 | IPI00010182,IPI00218836,IPI00815745             | 11775.9  | 100% |
| 1 | IPI00293867                                     | 12694.2  | 100% |
| 1 | IPI00015953                                     | 87328    | 0    |
| 1 | IPI00215637                                     | 73227.7  | 18%  |
| 1 | IPI00742905                                     | 146459   | 100% |
| 1 | IPI00398918                                     | 50809.8  | 100% |
| 1 | IPI00008454                                     | 40496.6  | 100% |
| 1 | IPI00024523                                     | 36070.2  | 100% |
| 1 | IPI00006713                                     | 57564.2  | 98%  |
| 2 | IPI00333140,IPI00783545                         | 78455.9  | 100% |
| 4 | IPI00146935,IPI00235412,IPI00473085,IPI00555883 | 78084    | 0    |
| 1 | IPI00257508                                     | 62276    | 100% |
| 2 | IPI00025846,IPI00220146                         | 99944.6  | 100% |
| 1 | IPI00028931                                     | 122276.4 | 100% |
| 3 | IPI00031045,IPI00473014,IPI00643237             | 16603.2  | 100% |
| 3 | IPI00013679,IPI00749113,IPI00793322             | 26689    | 0    |

|   |                                                             |          |      |
|---|-------------------------------------------------------------|----------|------|
| 2 | IPI00456969,IPI00477531                                     | 532387.6 | 100% |
| 1 | IPI00019329                                                 | 10348.1  | 100% |
| 2 | IPI00003351,IPI00645849                                     | 60655.4  | 100% |
| 2 | IPI00306046,IPI00399105                                     | 53747    | 100% |
| 1 | IPI00396485                                                 | 50123.2  | 100% |
| 1 | IPI00014424                                                 | 50452.6  | 100% |
| 1 | IPI00178440                                                 | 24746.2  | 100% |
| 1 | IPI00642971                                                 | 71390.3  | 100% |
| 2 | IPI00000875,IPI00747497                                     | 50101.4  | 100% |
| 1 | IPI00186290                                                 | 95322.1  | 100% |
| 4 | IPI00029658,IPI00220813,IPI00220814,IPI00220815             | 54621.1  | 100% |
| 1 | IPI00060181                                                 | 26680.4  | 55%  |
| 1 | IPI00005517                                                 | 26279.4  | 0    |
| 1 | IPI00015077                                                 | 12714.9  | 100% |
| 1 | IPI00219678                                                 | 36094.7  | 55%  |
| 1 | IPI00297982                                                 | 51092.2  | 0    |
| 1 | IPI00290461                                                 | 29045.3  | 100% |
| 1 | IPI00290460                                                 | 35594    | 99%  |
| 1 | IPI00654777                                                 | 39128.5  | 55%  |
| 1 | IPI00465233                                                 | 70886.5  | 0    |
| 2 | IPI00012079,IPI00439415                                     | 69208.8  | 55%  |
| 1 | IPI00783643                                                 | 24906.5  | 99%  |
| 4 | IPI00220365,IPI00384463,IPI00479262,IPI00798400             | 178140.1 | 100% |
| 1 | IPI00411704                                                 | 16814.7  | 100% |
| 3 | IPI00374054,IPI00411623,IPI00646954                         | 63906.9  | 100% |
| 1 | IPI00465248                                                 | 47152.2  | 100% |
| 2 | IPI00156171,IPI00303210                                     | 98987.4  | 100% |
| 1 | IPI00478478                                                 | 51141.6  | 100% |
| 1 | IPI00032230                                                 | 120661.8 | 100% |
| 1 | IPI00008318                                                 | 109842.6 | 100% |
| 2 | IPI00008290,IPI00215945                                     | 114767   | 100% |
| 1 | IPI00013452                                                 | 170575.2 | 55%  |
| 1 | IPI00024911                                                 | 28976.9  | 100% |
| 1 | IPI00015186                                                 | 20076.3  | 100% |
| 2 | IPI00009841,IPI00065554                                     | 68947.8  | 100% |
| 1 | IPI00293128                                                 | 86239.4  | 100% |
| 2 | IPI00002732,IPI00790204                                     | 37563.9  | 100% |
| 2 | IPI00456750,IPI00647286                                     | 82666.1  | 55%  |
| 1 | IPI00006657                                                 | 46415.4  | 100% |
| 1 | IPI00021923                                                 | 24662.9  | 100% |
| 1 | IPI00031820                                                 | 57546.5  | 0    |
| 1 | IPI00645907                                                 | 273409.1 | 100% |
| 1 | IPI00031411                                                 | 506925.3 | 100% |
| 1 | IPI00296537                                                 | 74441.9  | 55%  |
| 1 | IPI00296534                                                 | 77240.8  | 100% |
| 2 | IPI00328113,IPI00784458                                     | 312283   | 100% |
| 2 | IPI00019439,IPI00784315                                     | 314744.5 | 100% |
| 2 | IPI00101405,IPI00797614                                     | 48258.8  | 100% |
| 6 | IPI00021048,IPI00216269,IPI00385318,IPI00645867,IPI00000000 | 234697.6 | 0    |
| 2 | IPI00296053,IPI00759715                                     | 54619.8  | 55%  |
| 1 | IPI00303300                                                 | 64227.9  | 55%  |
| 1 | IPI00024157                                                 | 25159.4  | 98%  |
| 1 | IPI00219005                                                 | 51787.9  | 100% |
| 4 | IPI00059292,IPI00219306,IPI00513955,IPI00745029             | 17258.6  | 100% |
| 1 | IPI00002191                                                 | 63529.8  | 100% |
| 1 | IPI00302592                                                 | 279990.7 | 100% |
| 3 | IPI00289334,IPI00382696,IPI00477536                         | 278171.9 | 100% |
| 1 | IPI00470919                                                 | 266182.2 | 100% |
| 1 | IPI00744362                                                 | 249334.4 | 0    |
| 1 | IPI00022418                                                 | 262581   | 100% |
| 2 | IPI00163187,IPI00747810                                     | 54512.3  | 100% |
| 3 | IPI00021081,IPI00217070,IPI00217071                         | 37988.6  | 100% |
| 1 | IPI00029723                                                 | 34967.3  | 100% |



|   |                                                             |          |      |
|---|-------------------------------------------------------------|----------|------|
| 1 | IPI00025155                                                 | 27643.9  | 100% |
| 1 | IPI00477747                                                 | 93073.4  | 100% |
| 1 | IPI00298956                                                 | 74243.3  | 55%  |
| 3 | IPI00375441,IPI00644386,IPI00788671                         | 67542.6  | 100% |
| 1 | IPI00745745                                                 | 53672    | 100% |
| 1 | IPI00012440                                                 | 54044.1  | 100% |
| 1 | IPI00260715                                                 | 53359.1  | 100% |
| 1 | IPI00012442                                                 | 52144.8  | 100% |
| 1 | IPI00760751                                                 | 62451.7  | 100% |
| 1 | IPI00783446                                                 | 105320.6 | 100% |
| 1 | IPI00026637                                                 | 13285.3  | 100% |
| 1 | IPI00008790                                                 | 77048.8  | 100% |
| 1 | IPI00183321                                                 | 64910.4  | 100% |
| 1 | IPI00029605                                                 | 58009.4  | 55%  |
| 2 | IPI00375205,IPI00456479                                     | 68975.1  | 98%  |
| 1 | IPI00004669                                                 | 64715.1  | 100% |
| 1 | IPI00005401                                                 | 106250.2 | 100% |
| 1 | IPI00328391                                                 | 75372.6  | 100% |
| 1 | IPI00166613                                                 | 63057.4  | 100% |
| 1 | IPI00011454                                                 | 109422.2 | 100% |
| 1 | IPI00219018                                                 | 36035.3  | 100% |
| 2 | IPI00465260,IPI00783097                                     | 77514    | 100% |
| 3 | IPI00032532,IPI00412410,IPI00412412                         | 74906.6  | 100% |
| 2 | IPI00021807,IPI00759616                                     | 59699.7  | 100% |
| 1 | IPI00296635                                                 | 80444.9  | 0    |
| 1 | IPI00306140                                                 | 20891.8  | 100% |
| 1 | IPI00010090                                                 | 30709.3  | 0    |
| 1 | IPI00001159                                                 | 292918.6 | 100% |
| 1 | IPI00166086                                                 | 45856.2  | 43%  |
| 1 | IPI00465184                                                 | 50986    | 100% |
| 1 | IPI00306543                                                 | 34150.9  | 100% |
| 1 | IPI00640006                                                 | 45603.5  | 100% |
| 1 | IPI00023728                                                 | 35947.8  | 100% |
| 1 | IPI00025869                                                 | 48750.3  | 100% |
| 2 | IPI00441344,IPI00797646                                     | 76075.8  | 100% |
| 1 | IPI00433284                                                 | 70098.8  | 100% |
| 1 | IPI00219025                                                 | 11757.8  | 55%  |
| 1 | IPI00168262                                                 | 71619.7  | 55%  |
| 1 | IPI00018236                                                 | 20804.9  | 100% |
| 1 | IPI00029079                                                 | 76698.7  | 98%  |
| 1 | IPI00641950                                                 | 37871.3  | 100% |
| 1 | IPI00000137                                                 | 33956    | 55%  |
| 1 | IPI00012102                                                 | 62066    | 55%  |
| 3 | IPI00171411,IPI00759659,IPI00784293                         | 46254.7  | 100% |
| 1 | IPI00219029                                                 | 46230.1  | 100% |
| 1 | IPI00018206                                                 | 47458.6  | 99%  |
| 1 | IPI00015688                                                 | 61633.3  | 100% |
| 1 | IPI00001755                                                 | 62718.3  | 99%  |
| 1 | IPI00027497                                                 | 63130.5  | 100% |
| 2 | IPI00150961,IPI00783872                                     | 78346.4  | 100% |
| 5 | IPI00217481,IPI00423340,IPI00423342,IPI00651640,IPI00026199 | 139915.9 | 100% |
| 1 | IPI00026199                                                 | 25488.2  | 100% |
| 1 | IPI00328709                                                 | 19302.2  | 100% |
| 1 | IPI00296713                                                 | 63522    | 100% |
| 1 | IPI00026314                                                 | 85679.8  | 100% |
| 2 | IPI00016862,IPI00759575                                     | 56239.4  | 100% |
| 1 | IPI00219757                                                 | 23338.7  | 100% |
| 1 | IPI00290416                                                 | 44727.4  | 100% |
| 1 | IPI00021808                                                 | 57394.5  | 100% |
| 1 | IPI00453476                                                 | 28832.9  | 100% |
| 1 | IPI00514127                                                 | 28246.4  | 0    |
| 1 | IPI00022228                                                 | 141424.1 | 100% |
| 1 | IPI00027851                                                 | 60671.8  | 100% |

|   |                                                    |          |      |
|---|----------------------------------------------------|----------|------|
| 1 | IPI00012585                                        | 63095.3  | 100% |
| 1 | IPI00239077                                        | 13784.1  | 55%  |
| 8 | IPI00081836,IPI00102165,IPI00216457,IPI00220855,IP | 13888.8  | 0    |
| 5 | IPI00152906,IPI00303133,IPI00329665,IPI00719084,IP | 13918.6  | 100% |
| 1 | IPI00453473                                        | 11349.7  | 100% |
| 1 | IPI00742968                                        | 40670.1  | 100% |
| 1 | IPI00472882                                        | 40890.2  | 0    |
| 2 | IPI00471951,IPI00816057                            | 40844.3  | 100% |
| 1 | IPI00651697                                        | 40842.3  | 0    |
| 1 | IPI00815806                                        | 20147.3  | 100% |
| 4 | IPI00217477,IPI00411540,IPI00640781,IPI00643317    | 22962.7  | 0    |
| 2 | IPI00007764,IPI00384857                            | 15996.6  | 100% |
| 3 | IPI00215965,IPI00465365,IPI00797148                | 38828.1  | 100% |
| 2 | IPI00396378,IPI00414696                            | 37412.3  | 100% |
| 1 | IPI00334713                                        | 30570.2  | 100% |
| 3 | IPI00216592,IPI00477313,IPI00759596                | 32320    | 100% |
| 2 | IPI00011274,IPI00045498                            | 46420.6  | 55%  |
| 1 | IPI00003881                                        | 45653.8  | 100% |
| 1 | IPI00479191                                        | 51212.1  | 100% |
| 2 | IPI00514561,IPI00807545                            | 47541.6  | 100% |
| 2 | IPI00027834,IPI00796199                            | 64114.8  | 100% |
| 2 | IPI00171903,IPI00383296                            | 77499.3  | 99%  |
| 2 | IPI00479217,IPI00644079                            | 88962.3  | 100% |
| 1 | IPI00218493                                        | 24562.2  | 100% |
| 3 | IPI00157454,IPI00160316,IPI00395692                | 69112.8  | 100% |
| 1 | IPI00382470                                        | 98147.1  | 100% |
| 1 | IPI00334775                                        | 84743.6  | 100% |
| 1 | IPI00027230                                        | 92453.7  | 100% |
| 2 | IPI00304925,IPI00807640                            | 70022    | 100% |
| 1 | IPI00002966                                        | 94283    | 100% |
| 1 | IPI00003362                                        | 72405.6  | 100% |
| 1 | IPI00003865                                        | 70881.8  | 100% |
| 1 | IPI00007765                                        | 73663.3  | 55%  |
| 2 | IPI00472102,IPI00784154                            | 61195.9  | 100% |
| 1 | IPI00220362                                        | 10913.7  | 100% |
| 1 | IPI00024284                                        | 468787.5 | 100% |
| 2 | IPI00218993,IPI00514983                            | 92099    | 100% |
| 1 | IPI00003176                                        | 51269.3  | 100% |
| 2 | IPI00168847,IPI00178140                            | 45127.1  | 100% |
| 1 | IPI00000877                                        | 111318.8 | 100% |
| 1 | IPI00220373                                        | 118009   | 55%  |
| 1 | IPI00027223                                        | 46642.5  | 100% |
| 1 | IPI00289819                                        | 274255.5 | 100% |
| 1 | IPI00297284                                        | 35119.1  | 100% |
| 2 | IPI00018305,IPI00556155                            | 31656.1  | 100% |
| 1 | IPI00029235                                        | 25303.8  | 100% |
| 1 | IPI00016915                                        | 29111.8  | 100% |
| 1 | IPI00291987                                        | 28986.6  | 100% |
| 1 | IPI00007793                                        | 23701.2  | 100% |
| 1 | IPI00297124                                        | 103504.9 | 55%  |
| 1 | IPI00005198                                        | 43044.7  | 100% |
| 2 | IPI00298788,IPI00418313                            | 95320.9  | 99%  |
| 1 | IPI00291510                                        | 55788.4  | 100% |
| 1 | IPI00009342                                        | 189240.6 | 100% |
| 1 | IPI00010105                                        | 26580.2  | 55%  |
| 1 | IPI00640865                                        | 53901.3  | 100% |
| 1 | IPI00031821                                        | 30321.1  | 100% |
| 4 | IPI00008575,IPI00082310,IPI00385834,IPI00479209    | 48210.2  | 100% |
| 1 | IPI00298363                                        | 72691.2  | 100% |
| 1 | IPI00015504                                        | 80764.2  | 100% |
| 1 | IPI00002214                                        | 57844.5  | 100% |
| 1 | IPI00001639                                        | 97153.3  | 100% |
| 1 | IPI00217963                                        | 51251    | 100% |

|   |                                                 |          |      |
|---|-------------------------------------------------|----------|------|
| 1 | IPI00479145                                     | 44075    | 100% |
| 1 | IPI00003818                                     | 52335.3  | 100% |
| 3 | IPI00027087,IPI00334532,IPI00646281             | 139985.2 | 100% |
| 1 | IPI00375294                                     | 337133.7 | 100% |
| 1 | IPI00783665                                     | 399725.1 | 100% |
| 1 | IPI00013976                                     | 198045.3 | 100% |
| 1 | IPI00296922                                     | 196057.1 | 100% |
| 1 | IPI00298281                                     | 177587.1 | 100% |
| 1 | IPI00009650                                     | 19232.3  | 100% |
| 1 | IPI00217966                                     | 36671.2  | 100% |
| 1 | IPI00219217                                     | 36620.6  | 100% |
| 1 | IPI00000070                                     | 95356.7  | 100% |
| 1 | IPI00045839                                     | 90599.2  | 100% |
| 1 | IPI00219219                                     | 14697.8  | 100% |
| 1 | IPI00465431                                     | 26170.8  | 100% |
| 1 | IPI00023673                                     | 65314.1  | 100% |
| 1 | IPI00293303                                     | 49393    | 100% |
| 3 | IPI00007207,IPI00446007,IPI00748567             | 45401.8  | 100% |
| 1 | IPI00005686                                     | 56777.4  | 100% |
| 1 | IPI00026530                                     | 57531.2  | 100% |
| 1 | IPI00009950                                     | 40211.5  | 100% |
| 1 | IPI00021405                                     | 74122.7  | 100% |
| 1 | IPI00217975                                     | 66391.6  | 55%  |
| 2 | IPI00399212,IPI00414127                         | 35005.8  | 100% |
| 1 | IPI00456898                                     | 14579.8  | 0    |
| 1 | IPI00740545                                     | 121267   | 0    |
| 1 | IPI00007797                                     | 15146.4  | 55%  |
| 2 | IPI00294839,IPI00782994                         | 87000.3  | 100% |
| 1 | IPI00045841                                     | 53293.8  | 99%  |
| 1 | IPI00005774                                     | 105658.4 | 55%  |
| 2 | IPI00219077,IPI00514090                         | 69269.1  | 100% |
| 1 | IPI00292657                                     | 35852.5  | 100% |
| 2 | IPI00073196,IPI00398794                         | 139336.6 | 100% |
| 1 | IPI00783492                                     | 165717.2 | 100% |
| 1 | IPI00216804                                     | 46407.4  | 100% |
| 2 | IPI00020986,IPI00794403                         | 38413.5  | 100% |
| 1 | IPI00301459                                     | 46640.9  | 100% |
| 1 | IPI00008207                                     | 79563.9  | 100% |
| 1 | IPI00003802                                     | 131071.5 | 100% |
| 2 | IPI00008868,IPI00374770                         | 270602.3 | 99%  |
| 1 | IPI00017596                                     | 29981.5  | 100% |
| 1 | IPI00010157                                     | 43642.8  | 100% |
| 1 | IPI00005690                                     | 52892.5  | 100% |
| 2 | IPI00017297,IPI00789551                         | 94608.7  | 0    |
| 1 | IPI00016334                                     | 71588.5  | 100% |
| 1 | IPI00291005                                     | 36408.9  | 100% |
| 1 | IPI00291006                                     | 35513.7  | 100% |
| 1 | IPI00010333                                     | 15567.3  | 100% |
| 1 | IPI00008215                                     | 64133.4  | 100% |
| 1 | IPI00399089                                     | 26059.9  | 100% |
| 2 | IPI00029273,IPI00792387                         | 155511.2 | 100% |
| 2 | IPI00300763,IPI00789396                         | 50492.3  | 55%  |
| 1 | IPI00002236                                     | 43104.9  | 100% |
| 1 | IPI00025809                                     | 51533.1  | 55%  |
| 2 | IPI00395751,IPI00744230                         | 64828.8  | 0    |
| 1 | IPI00020407                                     | 84526.8  | 100% |
| 1 | IPI00293276                                     | 12458.5  | 55%  |
| 1 | IPI00293748                                     | 55034.9  | 100% |
| 1 | IPI00004233                                     | 358677.8 | 55%  |
| 1 | IPI00008561                                     | 53989.9  | 100% |
| 1 | IPI00013405                                     | 54135    | 55%  |
| 4 | IPI00033494,IPI00220573,IPI00604523,IPI00719669 | 19762.3  | 100% |
| 1 | IPI00219365                                     | 67803.8  | 100% |

|   |                                                             |          |      |
|---|-------------------------------------------------------------|----------|------|
| 1 | IPI00011876                                                 | 31232.4  | 0    |
| 1 | IPI00179589                                                 | 12877.3  | 100% |
| 1 | IPI00019502                                                 | 226519.5 | 100% |
| 1 | IPI00789605                                                 | 16942.8  | 100% |
| 1 | IPI00797126                                                 | 94662.5  | 100% |
| 1 | IPI00008787                                                 | 82149.5  | 0    |
| 4 | IPI00023860,IPI00789029,IPI00791065,IPI00793389             | 45357    | 100% |
| 2 | IPI00179953,IPI00332499                                     | 85217.5  | 100% |
| 1 | IPI00555628                                                 | 89159.4  | 98%  |
| 1 | IPI00019380                                                 | 91823.1  | 0    |
| 1 | IPI00827674                                                 | 74380.2  | 0    |
| 1 | IPI00020008                                                 | 9054     | 100% |
| 1 | IPI00002525                                                 | 18839.1  | 98%  |
| 1 | IPI00028908                                                 | 151376.5 | 100% |
| 1 | IPI00795292                                                 | 30119.3  | 0    |
| 1 | IPI00329352                                                 | 134335.7 | 100% |
| 1 | IPI00304596                                                 | 54213.6  | 100% |
| 1 | IPI00029819                                                 | 243632   | 100% |
| 1 | IPI00011140                                                 | 39142.7  | 100% |
| 1 | IPI00017672                                                 | 32533.5  | 100% |
| 1 | IPI00301579                                                 | 16552    | 100% |
| 1 | IPI00026216                                                 | 103261.1 | 0    |
| 2 | IPI00220740,IPI00549248                                     | 29446.9  | 100% |
| 1 | IPI00619898                                                 | 26905.4  | 100% |
| 1 | IPI00333778                                                 | 130836.5 | 100% |
| 7 | IPI00165438,IPI00299594,IPI00398715,IPI00549340,IPI00000000 | 72049.8  | 100% |
| 2 | IPI00100197,IPI00397571                                     | 40555.2  | 100% |
| 1 | IPI00385236                                                 | 66333    | 100% |
| 2 | IPI00295542,IPI00790899                                     | 53861.6  | 100% |
| 1 | IPI00009123                                                 | 50206.3  | 100% |
| 1 | IPI00550746                                                 | 38225.7  | 100% |
| 1 | IPI00646917                                                 | 26210.1  | 55%  |
| 1 | IPI00009901                                                 | 14460.9  | 100% |
| 1 | IPI00328703                                                 | 30670.4  | 100% |
| 4 | IPI00017841,IPI00419820,IPI00472517,IPI00550145             | 55383.3  | 100% |
| 1 | IPI00184375                                                 | 38513.5  | 100% |
| 1 | IPI00385326                                                 | 73037.1  | 100% |
| 1 | IPI00186581                                                 | 69376.5  | 0    |
| 1 | IPI00398855                                                 | 67561.2  | 100% |
| 1 | IPI00009923                                                 | 61033.6  | 100% |
| 1 | IPI00010796                                                 | 57100.1  | 100% |
| 2 | IPI00748022,IPI00786945                                     | 46189.8  | 100% |
| 2 | IPI00299000,IPI00794875                                     | 43768.7  | 100% |
| 1 | IPI00796945                                                 | 70320.8  | 100% |
| 1 | IPI00217223                                                 | 49662.3  | 55%  |
| 1 | IPI00177543                                                 | 108498.8 | 55%  |
| 2 | IPI00001869,IPI00513756                                     | 181119.7 | 100% |
| 1 | IPI00298547                                                 | 19873.1  | 100% |
| 1 | IPI00449049                                                 | 113069.8 | 100% |
| 1 | IPI00018873                                                 | 55504.5  | 100% |
| 1 | IPI00016610                                                 | 37480.2  | 100% |
| 1 | IPI00012066                                                 | 38204.5  | 55%  |
| 3 | IPI00024989,IPI00411680,IPI00828189                         | 24661.8  | 100% |
| 1 | IPI00021700                                                 | 28751.3  | 100% |
| 1 | IPI00002543                                                 | 45699.3  | 100% |
| 1 | IPI00002280                                                 | 27355.2  | 100% |
| 2 | IPI00165229,IPI00294862                                     | 101630.8 | 100% |
| 1 | IPI00013297                                                 | 20612.8  | 0    |
| 1 | IPI00025277                                                 | 21851.1  | 100% |
| 1 | IPI00246058                                                 | 96802.5  | 100% |
| 1 | IPI00099977                                                 | 39011.3  | 100% |
| 1 | IPI00006236                                                 | 41842.9  | 100% |
| 1 | IPI00025252                                                 | 56766.6  | 100% |

|   |                                     |          |      |
|---|-------------------------------------|----------|------|
| 1 | IPI00009904                         | 72916    | 100% |
| 2 | IPI00299571,IPI00644989             | 53883.9  | 100% |
| 1 | IPI00007935                         | 63953    | 55%  |
| 1 | IPI00219446                         | 21038.9  | 100% |
| 1 | IPI00006052                         | 16629.8  | 100% |
| 1 | IPI00015891                         | 15296.6  | 100% |
| 1 | IPI00643196                         | 85299.1  | 100% |
| 1 | IPI00216691                         | 15036.3  | 100% |
| 1 | IPI00219525                         | 53123.9  | 100% |
| 1 | IPI00169383                         | 44597.3  | 100% |
| 1 | IPI00550364                         | 68267.7  | 100% |
| 1 | IPI00220739                         | 21654.2  | 55%  |
| 1 | IPI00012575                         | 32095.7  | 99%  |
| 1 | IPI00479186                         | 57919.5  | 100% |
| 1 | IPI00011588                         | 50061.6  | 100% |
| 1 | IPI00019590                         | 62898.6  | 100% |
| 3 | IPI00014898,IPI00186711,IPI00398002 | 531707.9 | 55%  |
| 1 | IPI00027192                         | 83534.5  | 100% |
| 2 | IPI00337495,IPI00472165             | 87082.2  | 100% |
| 1 | IPI00030255                         | 84768.8  | 100% |
| 1 | IPI00216694                         | 70795.9  | 100% |
| 1 | IPI00643034                         | 54723.1  | 100% |
| 1 | IPI00015018                         | 32642.6  | 100% |
| 1 | IPI00419585                         | 17994.9  | 100% |
| 1 | IPI00646304                         | 23725.2  | 100% |
| 1 | IPI00026519                         | 22022.4  | 100% |
| 1 | IPI00398922                         | 20947.2  | 0    |
| 2 | IPI00419307,IPI00554737             | 65291.7  | 100% |
| 1 | IPI00002412                         | 34176    | 100% |
| 1 | IPI00399307                         | 58083    | 55%  |
| 1 | IPI00000874                         | 22092.9  | 100% |
| 1 | IPI00027350                         | 21874.4  | 100% |
| 1 | IPI00024919                         | 27674.7  | 100% |
| 1 | IPI00011937                         | 30523.1  | 100% |
| 1 | IPI00220301                         | 25018.1  | 100% |
| 2 | IPI00026154,IPI00792916             | 59407.7  | 100% |
| 2 | IPI00064328,IPI00441473             | 71303.7  | 100% |
| 1 | IPI00009276                         | 30697.3  | 100% |
| 1 | IPI00294004                         | 75105.4  | 100% |
| 1 | IPI00004968                         | 55163.3  | 100% |
| 1 | IPI00026941                         | 42984.4  | 100% |
| 1 | IPI00744835                         | 58465.3  | 100% |
| 1 | IPI00001734                         | 40405.3  | 100% |
| 2 | IPI00016832,IPI00472442             | 29538    | 100% |
| 1 | IPI00219622                         | 25880.9  | 100% |
| 1 | IPI00291922                         | 26393.3  | 100% |
| 1 | IPI00029623                         | 27381.5  | 100% |
| 1 | IPI00218372                         | 20175.6  | 100% |
| 1 | IPI00025019                         | 26472.5  | 100% |
| 1 | IPI00028006                         | 22819.5  | 100% |
| 1 | IPI00028004                         | 22931.6  | 100% |
| 1 | IPI00555956                         | 29187    | 0    |
| 1 | IPI00003217                         | 29947.9  | 100% |
| 1 | IPI00299608                         | 105821.2 | 100% |
| 1 | IPI00105598                         | 47519.4  | 100% |
| 1 | IPI00030154                         | 28705.9  | 100% |
| 2 | IPI00384051,IPI00746205             | 27344.3  | 100% |
| 3 | IPI00179964,IPI00183626,IPI00334175 | 57204.5  | 100% |
| 1 | IPI00790462                         | 14940.9  | 100% |
| 1 | IPI00022048                         | 98537.6  | 98%  |
| 3 | IPI00107831,IPI00465186,IPI00642154 | 211825.8 | 100% |
| 1 | IPI00029568                         | 42001.9  | 100% |
| 1 | IPI00219426                         | 39285.1  | 100% |

|   |                                                 |          |      |
|---|-------------------------------------------------|----------|------|
| 1 | IPI00787655                                     | 174439.9 | 100% |
| 1 | IPI00004358                                     | 96680.3  | 100% |
| 1 | IPI00470525                                     | 97134.4  | 55%  |
| 1 | IPI00003919                                     | 40859.9  | 100% |
| 1 | IPI00003590                                     | 82560.7  | 100% |
| 3 | IPI00376394,IPI00479085,IPI00783371             | 77739.3  | 100% |
| 1 | IPI00008223                                     | 43153.1  | 100% |
| 3 | IPI00643041,IPI00795671,IPI00796462             | 24405.1  | 0    |
| 1 | IPI00646512                                     | 52295.8  | 100% |
| 1 | IPI00024320                                     | 17152.6  | 55%  |
| 1 | IPI00304692                                     | 42315.7  | 100% |
| 1 | IPI00001661                                     | 48126.3  | 0    |
| 2 | IPI00027500,IPI00478231                         | 21750.4  | 100% |
| 1 | IPI00029699                                     | 16822.4  | 100% |
| 1 | IPI00008554                                     | 16532.2  | 100% |
| 1 | IPI00414896                                     | 29463.2  | 100% |
| 1 | IPI00642211                                     | 73481.6  | 100% |
| 2 | IPI00412579,IPI00827508                         | 24814    | 100% |
| 1 | IPI00024933                                     | 17801.1  | 100% |
| 2 | IPI00008530,IPI00556485                         | 34256.3  | 100% |
| 1 | IPI00008527                                     | 11496.1  | 55%  |
| 1 | IPI00008529                                     | 11647.5  | 100% |
| 1 | IPI00013917                                     | 14507.7  | 100% |
| 3 | IPI00017448,IPI00387084,IPI00797280             | 9093.6   | 100% |
| 1 | IPI00011253                                     | 26670.6  | 99%  |
| 1 | IPI00217030                                     | 29581.3  | 100% |
| 1 | IPI00013415                                     | 22109.5  | 0    |
| 2 | IPI00413108,IPI00553164                         | 33295.5  | 100% |
| 1 | IPI00215743                                     | 152695.7 | 100% |
| 2 | IPI00013895,IPI00790691                         | 11723.1  | 100% |
| 1 | IPI00012426                                     | 50814    | 0    |
| 2 | IPI00217435,IPI00747808                         | 107801.9 | 100% |
| 1 | IPI00299086                                     | 32427.3  | 100% |
| 1 | IPI00106646                                     | 41788.9  | 100% |
| 1 | IPI00170635                                     | 27020.6  | 100% |
| 1 | IPI00031510                                     | 88872.8  | 100% |
| 2 | IPI00028213,IPI00783087                         | 89636.9  | 100% |
| 1 | IPI00004494                                     | 89211.5  | 100% |
| 2 | IPI00014177,IPI00792151                         | 41470.1  | 100% |
| 1 | IPI00784808                                     | 64664.3  | 0    |
| 4 | IPI00410693,IPI00412714,IPI00470497,IPI00470498 | 44947.8  | 100% |
| 1 | IPI00007117                                     | 46579.6  | 100% |
| 1 | IPI00783625                                     | 42122.1  | 100% |
| 1 | IPI00032139                                     | 42386.3  | 100% |
| 1 | IPI00009890                                     | 43985.2  | 100% |
| 1 | IPI00072377                                     | 33471.4  | 100% |
| 1 | IPI00017451                                     | 88868.1  | 100% |
| 1 | IPI00029764                                     | 58833.3  | 0    |
| 1 | IPI00026089                                     | 145802.3 | 100% |
| 1 | IPI00017339                                     | 44368.5  | 100% |
| 1 | IPI00013890                                     | 27756.8  | 100% |
| 1 | IPI00010740                                     | 76131.5  | 100% |
| 1 | IPI00003377                                     | 27349.5  | 100% |
| 1 | IPI00017480                                     | 49907.6  | 55%  |
| 1 | IPI00010949                                     | 58297.3  | 100% |
| 1 | IPI00296197                                     | 52067.8  | 100% |
| 1 | IPI00647217                                     | 117790.3 | 100% |
| 1 | IPI00301364                                     | 18640.3  | 100% |
| 1 | IPI00220194                                     | 54067.3  | 100% |
| 2 | IPI00554702,IPI00604710                         | 64856.9  | 100% |
| 1 | IPI00221393                                     | 73286.6  | 100% |
| 1 | IPI00008580                                     | 14308    | 32%  |
| 1 | IPI00301812                                     | 48144.5  | 100% |

|   |                                                    |          |      |
|---|----------------------------------------------------|----------|------|
| 1 | IPI00140420                                        | 101980.5 | 100% |
| 9 | IPI00027285,IPI00220360,IPI00384173,IPI00785142,IP | 24592.6  | 100% |
| 1 | IPI00302850                                        | 13263.9  | 100% |
| 1 | IPI00017964                                        | 13898.6  | 100% |
| 2 | IPI00218733,IPI00783680                            | 16103.7  | 100% |
| 1 | IPI00005292                                        | 49106.7  | 100% |
| 2 | IPI00021000,IPI00385896                            | 35404.6  | 100% |
| 3 | IPI00478292,IPI00744706,IPI00745092                | 285466.8 | 100% |
| 1 | IPI00005614                                        | 274595.4 | 100% |
| 2 | IPI00783357,IPI00784104                            | 47669.4  | 55%  |
| 1 | IPI00019372                                        | 17606.5  | 100% |
| 1 | IPI00289795                                        | 51554.9  | 100% |
| 1 | IPI00004446                                        | 52954.3  | 100% |
| 1 | IPI00168554                                        | 14241.4  | 0    |
| 1 | IPI00009032                                        | 46821    | 100% |
| 1 | IPI00005154                                        | 81059.6  | 100% |
| 1 | IPI00032826                                        | 41314.4  | 100% |
| 1 | IPI00009629                                        | 39057.7  | 100% |
| 1 | IPI00020201                                        | 41278.3  | 0    |
| 1 | IPI00005564                                        | 27603.3  | 100% |
| 1 | IPI00008780                                        | 33230.1  | 100% |
| 1 | IPI00299299                                        | 51910.5  | 100% |
| 1 | IPI00013894                                        | 62624.1  | 100% |
| 1 | IPI00744618                                        | 15085.2  | 55%  |
| 3 | IPI00171412,IPI00334514,IPI00783919                | 33839.4  | 100% |
| 1 | IPI00018140                                        | 69585.5  | 100% |
| 2 | IPI00020194,IPI00294426                            | 61540.8  | 55%  |
| 1 | IPI00647915                                        | 24436.4  | 100% |
| 1 | IPI00744692                                        | 37523.7  | 100% |
| 1 | IPI00329633                                        | 83419.8  | 100% |
| 1 | IPI00217236                                        | 12837.2  | 100% |
| 2 | IPI00247871,IPI00744062                            | 123944   | 100% |
| 1 | IPI00290566                                        | 60327.2  | 55%  |
| 1 | IPI00021834                                        | 34998.1  | 100% |
| 1 | IPI00009198                                        | 26916.9  | 100% |
| 1 | IPI00022462                                        | 84855.6  | 100% |
| 1 | IPI00000075                                        | 44324.2  | 100% |
| 1 | IPI00235354                                        | 47731.4  | 100% |
| 1 | IPI00018219                                        | 74664.9  | 100% |
| 1 | IPI00329535                                        | 104181.8 | 55%  |
| 1 | IPI00328840                                        | 27540.5  | 100% |
| 1 | IPI00032292                                        | 23153.1  | 100% |
| 1 | IPI00788747                                        | 21647.9  | 100% |
| 2 | IPI00643920,IPI00788802                            | 67861.4  | 100% |
| 1 | IPI00216230                                        | 75475.8  | 100% |
| 1 | IPI00298362                                        | 46022.2  | 100% |
| 1 | IPI00024364                                        | 102340.8 | 100% |
| 2 | IPI00023137,IPI00477672                            | 37962.5  | 100% |
| 1 | IPI00301631                                        | 46182.3  | 100% |
| 1 | IPI00465028                                        | 30772.8  | 100% |
| 1 | IPI00479185                                        | 28853    | 0    |
| 1 | IPI00010779                                        | 28504.4  | 100% |
| 2 | IPI00022970,IPI00742682                            | 265846.5 | 0    |
| 2 | IPI00009943,IPI00550900                            | 21508.5  | 100% |
| 1 | IPI00030275                                        | 80094.9  | 0    |
| 2 | IPI00438229,IPI00438230                            | 88531    | 100% |
| 1 | IPI00641368                                        | 37790.4  | 100% |
| 1 | IPI00792677                                        | 46295.5  | 100% |
| 1 | IPI00011654                                        | 49652.6  | 100% |
| 1 | IPI00007752                                        | 49812.7  | 100% |
| 1 | IPI00216298                                        | 11719.3  | 100% |
| 1 | IPI00026328                                        | 19188.4  | 100% |
| 1 | IPI00401264                                        | 46954.5  | 55%  |

|    |                                                             |          |      |
|----|-------------------------------------------------------------|----------|------|
| 1  | IPI00008552                                                 | 37414.8  | 55%  |
| 2  | IPI00743646,IPI00783641                                     | 65796.6  | 100% |
| 1  | IPI00746657                                                 | 53710.4  | 100% |
| 23 | IPI00456429,IPI00719280,IPI00743241,IPI00743650,IPI00743651 | 14710.9  | 100% |
| 1  | IPI00645078                                                 | 117832.3 | 100% |
| 1  | IPI00021347                                                 | 17844.3  | 100% |
| 2  | IPI00003949,IPI00796342                                     | 17120.6  | 98%  |
| 1  | IPI00018352                                                 | 24806.3  | 100% |
| 8  | IPI00219512,IPI00219513,IPI00299313,IPI00549820,IPI00549821 | 36061.7  | 0    |
| 2  | IPI00024466,IPI00619903                                     | 177176.9 | 100% |
| 1  | IPI00031420                                                 | 55007.3  | 100% |
| 2  | IPI00410544,IPI00657807                                     | 48134.3  | 55%  |
| 2  | IPI00000873,IPI00829641                                     | 140459.5 | 0    |
| 2  | IPI00395488,IPI00745461                                     | 71696.1  | 100% |
| 1  | IPI00307162                                                 | 123783.3 | 55%  |
| 1  | IPI00022774                                                 | 89306.8  | 100% |
| 1  | IPI00028076                                                 | 46995.8  | 100% |
| 1  | IPI00069058                                                 | 67239.9  | 100% |
| 1  | IPI00746388                                                 | 69671.9  | 100% |
| 1  | IPI00418471                                                 | 53634.7  | 100% |
| 3  | IPI00180759,IPI00784236,IPI00785025                         | 75557.7  | 100% |
| 1  | IPI00018931                                                 | 91692    | 100% |
| 1  | IPI00396383                                                 | 46786.2  | 100% |
| 1  | IPI00412737                                                 | 48835.5  | 100% |
| 1  | IPI00022052                                                 | 26806    | 100% |
| 2  | IPI00298961,IPI00784388                                     | 123370.9 | 100% |
| 1  | IPI00220834                                                 | 82689.1  | 100% |
| 2  | IPI00465430,IPI00644712                                     | 69855.4  | 100% |
| 1  | IPI00012197                                                 | 18663.2  | 0    |
| 1  | IPI00183487                                                 | 107553   | 100% |
| 1  | IPI00450235                                                 | 34652    | 100% |
| 2  | IPI00216318,IPI00759832                                     | 28065.1  | 100% |
| 1  | IPI00000816                                                 | 29157    | 100% |
| 1  | IPI00220642                                                 | 28285.1  | 55%  |
| 1  | IPI00018146                                                 | 27747.4  | 100% |
| 1  | IPI00021263                                                 | 27727.9  | 100% |



## dem searching

| H460-Rep2 (HTB177-Forw) | H460-Rep3 (HTB177-Forw) | # Unique peptide H460-Rep1 (HTB177-Forw) | # Unique peptide H460-Rep2 (HTB177-Forw) |
|-------------------------|-------------------------|------------------------------------------|------------------------------------------|
| 0                       | 50%                     | 2                                        | 0                                        |
| 0                       | 100%                    | 0                                        | 0                                        |
| 0                       | 0                       | 5                                        | 0                                        |
| 0                       | 0                       | 2                                        | 0                                        |
| 100%                    | 100%                    | 7                                        | 5                                        |
| 0                       | 99%                     | 0                                        | 0                                        |
| 100%                    | 100%                    | 0                                        | 6                                        |
| 100%                    | 100%                    | 2                                        | 3                                        |
| 0                       | 100%                    | 14                                       | 0                                        |
| 100%                    | 0                       | 4                                        | 2                                        |
| 100%                    | 100%                    | 18                                       | 12                                       |
| 98%                     | 0                       | 0                                        | 1                                        |
| 100%                    | 100%                    | 4                                        | 2                                        |
| 100%                    | 0                       | 9                                        | 8                                        |
| 100%                    | 100%                    | 4                                        | 3                                        |
| 0                       | 0                       | 3                                        | 0                                        |
| 0                       | 0                       | 2                                        | 0                                        |
| 100%                    | 100%                    | 6                                        | 4                                        |
| 98%                     | 100%                    | 3                                        | 1                                        |
| 100%                    | 100%                    | 5                                        | 5                                        |
| 100%                    | 100%                    | 41                                       | 39                                       |
| 100%                    | 100%                    | 5                                        | 3                                        |
| 100%                    | 100%                    | 5                                        | 6                                        |
| 100%                    | 50%                     | 1                                        | 2                                        |
| 100%                    | 50%                     | 2                                        | 3                                        |
| 100%                    | 100%                    | 11                                       | 10                                       |
| 100%                    | 0                       | 0                                        | 3                                        |
| 58%                     | 100%                    | 3                                        | 1                                        |
| 100%                    | 100%                    | 7                                        | 6                                        |
| 58%                     | 0                       | 3                                        | 1                                        |
| 100%                    | 100%                    | 6                                        | 4                                        |
| 100%                    | 100%                    | 12                                       | 16                                       |
| 0                       | 0                       | 2                                        | 0                                        |
| 100%                    | 100%                    | 6                                        | 5                                        |
| 100%                    | 0                       | 7                                        | 5                                        |
| 58%                     | 100%                    | 2                                        | 1                                        |
| 100%                    | 50%                     | 1                                        | 2                                        |
| 100%                    | 100%                    | 2                                        | 6                                        |
| 100%                    | 100%                    | 11                                       | 11                                       |
| 100%                    | 100%                    | 12                                       | 9                                        |
| 100%                    | 0                       | 4                                        | 3                                        |
| 100%                    | 100%                    | 4                                        | 3                                        |
| 100%                    | 100%                    | 10                                       | 7                                        |
| 58%                     | 100%                    | 2                                        | 1                                        |
| 100%                    | 100%                    | 15                                       | 14                                       |
| 100%                    | 100%                    | 3                                        | 3                                        |
| 100%                    | 100%                    | 4                                        | 2                                        |
| 0                       | 0                       | 1                                        | 0                                        |
| 100%                    | 0                       | 3                                        | 3                                        |
| 0                       | 8%                      | 2                                        | 0                                        |
| 100%                    | 0                       | 1                                        | 2                                        |
| 100%                    | 100%                    | 1                                        | 2                                        |
| 100%                    | 100%                    | 5                                        | 5                                        |
| 100%                    | 100%                    | 5                                        | 5                                        |
| 100%                    | 0                       | 0                                        | 1                                        |
| 100%                    | 98%                     | 4                                        | 5                                        |
| 58%                     | 0                       | 2                                        | 1                                        |
| 100%                    | 100%                    | 4                                        | 3                                        |
| 100%                    | 50%                     | 2                                        | 2                                        |
| 100%                    | 100%                    | 2                                        | 2                                        |

|      |      |    |    |
|------|------|----|----|
| 0    | 100% | 6  | 0  |
| 58%  | 100% | 1  | 1  |
| 58%  | 50%  | 3  | 1  |
| 58%  | 100% | 0  | 1  |
| 100% | 99%  | 2  | 2  |
| 58%  | 50%  | 2  | 1  |
| 100% | 50%  | 0  | 2  |
| 58%  | 0    | 2  | 1  |
| 0    | 50%  | 2  | 0  |
| 0    | 0    | 5  | 0  |
| 100% | 100% | 0  | 3  |
| 99%  | 100% | 2  | 1  |
| 0    | 100% | 2  | 0  |
| 100% | 100% | 3  | 2  |
| 100% | 100% | 3  | 3  |
| 0    | 50%  | 2  | 0  |
| 0    | 100% | 3  | 0  |
| 100% | 100% | 3  | 2  |
| 100% | 50%  | 3  | 2  |
| 100% | 100% | 6  | 8  |
| 100% | 100% | 10 | 10 |
| 100% | 100% | 3  | 2  |
| 0    | 50%  | 2  | 0  |
| 100% | 100% | 2  | 2  |
| 100% | 100% | 5  | 6  |
| 100% | 0    | 4  | 3  |
| 100% | 100% | 0  | 5  |
| 58%  | 100% | 2  | 1  |
| 100% | 100% | 5  | 5  |
| 58%  | 50%  | 2  | 1  |
| 0    | 32%  | 1  | 0  |
| 0    | 100% | 0  | 0  |
| 0    | 100% | 5  | 0  |
| 100% | 0    | 0  | 1  |
| 100% | 100% | 2  | 3  |
| 58%  | 100% | 4  | 1  |
| 100% | 100% | 5  | 3  |
| 58%  | 100% | 2  | 1  |
| 100% | 100% | 5  | 3  |
| 100% | 100% | 2  | 3  |
| 100% | 39%  | 2  | 3  |
| 100% | 100% | 9  | 5  |
| 100% | 50%  | 1  | 2  |
| 100% | 50%  | 1  | 2  |
| 100% | 100% | 5  | 3  |
| 58%  | 50%  | 2  | 1  |
| 99%  | 100% | 0  | 1  |
| 0    | 0    | 2  | 0  |
| 100% | 100% | 10 | 9  |
| 100% | 100% | 4  | 2  |
| 100% | 100% | 7  | 5  |
| 100% | 100% | 40 | 37 |
| 0    | 100% | 1  | 0  |
| 100% | 100% | 6  | 6  |
| 100% | 100% | 2  | 3  |
| 98%  | 0    | 0  | 1  |
| 100% | 100% | 11 | 10 |
| 0    | 0    | 2  | 0  |
| 100% | 100% | 3  | 3  |
| 0    | 100% | 9  | 0  |
| 100% | 100% | 0  | 3  |
| 100% | 50%  | 1  | 2  |
| 100% | 50%  | 0  | 2  |

|      |      |    |    |
|------|------|----|----|
| 58%  | 100% | 1  | 1  |
| 100% | 100% | 5  | 5  |
| 100% | 100% | 1  | 3  |
| 10%  | 50%  | 2  | 0  |
| 100% | 100% | 14 | 17 |
| 100% | 100% | 14 | 8  |
| 100% | 100% | 18 | 21 |
| 100% | 0    | 2  | 2  |
| 100% | 13%  | 2  | 4  |
| 0    | 0    | 3  | 0  |
| 100% | 100% | 8  | 5  |
| 0    | 0    | 1  | 0  |
| 100% | 100% | 3  | 3  |
| 0    | 100% | 4  | 0  |
| 58%  | 50%  | 2  | 1  |
| 100% | 100% | 19 | 19 |
| 100% | 100% | 19 | 18 |
| 100% | 100% | 4  | 3  |
| 0    | 0    | 2  | 0  |
| 100% | 0    | 3  | 3  |
| 58%  | 99%  | 1  | 1  |
| 100% | 100% | 4  | 4  |
| 100% | 100% | 3  | 2  |
| 100% | 100% | 7  | 7  |
| 58%  | 50%  | 3  | 1  |
| 100% | 100% | 2  | 2  |
| 100% | 100% | 2  | 2  |
| 0    | 100% | 3  | 0  |
| 100% | 100% | 1  | 2  |
| 100% | 100% | 4  | 2  |
| 100% | 100% | 9  | 6  |
| 58%  | 100% | 2  | 1  |
| 7%   | 50%  | 2  | 0  |
| 100% | 100% | 15 | 13 |
| 100% | 100% | 4  | 4  |
| 100% | 100% | 5  | 6  |
| 100% | 100% | 10 | 14 |
| 100% | 100% | 14 | 10 |
| 100% | 100% | 12 | 13 |
| 100% | 100% | 6  | 6  |
| 0    | 100% | 2  | 0  |
| 100% | 100% | 5  | 4  |
| 100% | 100% | 5  | 5  |
| 100% | 100% | 3  | 3  |
| 100% | 100% | 2  | 4  |
| 100% | 100% | 4  | 4  |
| 100% | 100% | 12 | 10 |
| 100% | 100% | 3  | 2  |
| 58%  | 0    | 2  | 1  |
| 58%  | 98%  | 0  | 1  |
| 98%  | 0    | 0  | 1  |
| 100% | 100% | 3  | 2  |
| 99%  | 100% | 2  | 1  |
| 58%  | 100% | 3  | 1  |
| 0    | 0    | 2  | 0  |
| 0    | 0    | 1  | 0  |
| 100% | 100% | 2  | 2  |
| 31%  | 98%  | 0  | 0  |
| 100% | 100% | 5  | 3  |
| 100% | 100% | 2  | 2  |
| 100% | 100% | 8  | 6  |
| 22%  | 50%  | 3  | 0  |
| 58%  | 100% | 0  | 1  |

|      |      |    |    |
|------|------|----|----|
| 100% | 50%  | 3  | 2  |
| 58%  | 0    | 2  | 1  |
| 100% | 100% | 13 | 15 |
| 100% | 98%  | 2  | 3  |
| 100% | 100% | 11 | 10 |
| 100% | 100% | 3  | 2  |
| 100% | 100% | 4  | 2  |
| 100% | 98%  | 3  | 3  |
| 100% | 100% | 5  | 5  |
| 100% | 100% | 14 | 15 |
| 100% | 100% | 19 | 19 |
| 100% | 50%  | 1  | 2  |
| 100% | 50%  | 0  | 2  |
| 58%  | 0    | 2  | 1  |
| 0    | 100% | 1  | 0  |
| 58%  | 100% | 0  | 1  |
| 100% | 7%   | 2  | 2  |
| 100% | 50%  | 1  | 2  |
| 100% | 0    | 1  | 2  |
| 100% | 50%  | 0  | 2  |
| 100% | 100% | 1  | 2  |
| 0    | 50%  | 1  | 0  |
| 0    | 0    | 2  | 0  |
| 0    | 0    | 7  | 0  |
| 58%  | 50%  | 2  | 1  |
| 100% | 100% | 18 | 17 |
| 100% | 100% | 3  | 4  |
| 58%  | 0    | 2  | 1  |
| 100% | 100% | 7  | 2  |
| 0    | 50%  | 2  | 0  |
| 0    | 100% | 4  | 0  |
| 100% | 100% | 1  | 2  |
| 99%  | 100% | 3  | 1  |
| 100% | 100% | 2  | 2  |
| 0    | 50%  | 2  | 0  |
| 0    | 100% | 3  | 0  |
| 58%  | 100% | 2  | 1  |
| 0    | 100% | 1  | 0  |
| 100% | 100% | 4  | 2  |
| 100% | 100% | 6  | 3  |
| 100% | 0    | 0  | 2  |
| 100% | 100% | 32 | 20 |
| 100% | 100% | 6  | 5  |
| 100% | 50%  | 1  | 2  |
| 100% | 100% | 10 | 6  |
| 100% | 100% | 12 | 6  |
| 100% | 100% | 6  | 6  |
| 98%  | 100% | 2  | 1  |
| 0    | 98%  | 0  | 0  |
| 100% | 0    | 1  | 2  |
| 58%  | 100% | 1  | 1  |
| 58%  | 100% | 1  | 1  |
| 100% | 100% | 2  | 3  |
| 100% | 0    | 2  | 2  |
| 58%  | 50%  | 2  | 1  |
| 100% | 100% | 34 | 30 |
| 100% | 100% | 31 | 27 |
| 0    | 100% | 2  | 0  |
| 100% | 0    | 0  | 2  |
| 100% | 100% | 87 | 81 |
| 100% | 100% | 3  | 2  |
| 100% | 100% | 5  | 6  |
| 100% | 100% | 12 | 10 |

|      |      |    |    |
|------|------|----|----|
| 100% | 100% | 5  | 4  |
| 100% | 100% | 25 | 27 |
| 0    | 100% | 1  | 0  |
| 58%  | 100% | 3  | 1  |
| 100% | 50%  | 2  | 2  |
| 100% | 100% | 5  | 4  |
| 100% | 100% | 3  | 5  |
| 58%  | 50%  | 2  | 1  |
| 0    | 100% | 16 | 0  |
| 0    | 100% | 3  | 0  |
| 100% | 100% | 4  | 6  |
| 100% | 100% | 9  | 9  |
| 100% | 50%  | 2  | 3  |
| 100% | 50%  | 1  | 2  |
| 0    | 50%  | 1  | 0  |
| 100% | 100% | 8  | 6  |
| 0    | 0    | 3  | 0  |
| 0    | 100% | 2  | 0  |
| 100% | 100% | 7  | 5  |
| 100% | 100% | 20 | 15 |
| 100% | 100% | 12 | 13 |
| 58%  | 50%  | 2  | 1  |
| 0    | 0    | 2  | 0  |
| 100% | 100% | 9  | 8  |
| 100% | 0    | 0  | 2  |
| 0    | 0    | 3  | 0  |
| 58%  | 100% | 0  | 1  |
| 0    | 0    | 2  | 0  |
| 100% | 0    | 0  | 2  |
| 100% | 100% | 2  | 3  |
| 100% | 100% | 6  | 5  |
| 100% | 0    | 5  | 8  |
| 100% | 100% | 7  | 10 |
| 100% | 100% | 10 | 7  |
| 100% | 100% | 4  | 2  |
| 0    | 100% | 1  | 0  |
| 58%  | 100% | 1  | 1  |
| 58%  | 100% | 1  | 1  |
| 100% | 100% | 3  | 4  |
| 0    | 50%  | 1  | 0  |
| 100% | 100% | 3  | 2  |
| 0    | 100% | 1  | 0  |
| 100% | 50%  | 1  | 2  |
| 100% | 100% | 12 | 10 |
| 100% | 100% | 2  | 2  |
| 100% | 0    | 1  | 2  |
| 100% | 100% | 10 | 11 |
| 0    | 0    | 1  | 0  |
| 100% | 100% | 6  | 10 |
| 100% | 100% | 2  | 2  |
| 100% | 100% | 6  | 6  |
| 100% | 100% | 3  | 4  |
| 100% | 100% | 5  | 4  |
| 100% | 100% | 4  | 5  |
| 100% | 100% | 7  | 6  |
| 100% | 100% | 4  | 3  |
| 100% | 100% | 3  | 4  |
| 100% | 100% | 3  | 3  |
| 58%  | 100% | 2  | 1  |
| 100% | 100% | 6  | 6  |
| 0    | 100% | 0  | 0  |
| 21%  | 0    | 2  | 0  |
| 100% | 100% | 8  | 5  |

|      |      |    |    |
|------|------|----|----|
| 100% | 100% | 9  | 7  |
| 99%  | 100% | 1  | 1  |
| 0    | 100% | 0  | 0  |
| 58%  | 50%  | 2  | 1  |
| 100% | 100% | 2  | 3  |
| 100% | 100% | 14 | 11 |
| 100% | 100% | 0  | 4  |
| 0    | 100% | 6  | 0  |
| 100% | 0    | 0  | 5  |
| 100% | 100% | 8  | 4  |
| 100% | 50%  | 0  | 2  |
| 98%  | 100% | 3  | 1  |
| 100% | 100% | 9  | 7  |
| 100% | 100% | 10 | 10 |
| 100% | 100% | 3  | 3  |
| 100% | 100% | 4  | 3  |
| 0    | 100% | 1  | 0  |
| 100% | 50%  | 4  | 3  |
| 100% | 50%  | 2  | 2  |
| 0    | 100% | 5  | 0  |
| 100% | 100% | 3  | 2  |
| 0    | 50%  | 1  | 0  |
| 100% | 100% | 2  | 2  |
| 100% | 50%  | 3  | 2  |
| 100% | 100% | 4  | 2  |
| 100% | 100% | 24 | 26 |
| 100% | 100% | 15 | 10 |
| 100% | 100% | 10 | 11 |
| 100% | 100% | 11 | 13 |
| 100% | 100% | 4  | 3  |
| 100% | 100% | 20 | 21 |
| 100% | 100% | 23 | 23 |
| 100% | 50%  | 1  | 2  |
| 100% | 100% | 9  | 7  |
| 100% | 100% | 3  | 4  |
| 100% | 100% | 71 | 54 |
| 100% | 100% | 5  | 6  |
| 100% | 100% | 8  | 7  |
| 100% | 100% | 2  | 2  |
| 100% | 100% | 4  | 4  |
| 100% | 50%  | 1  | 2  |
| 100% | 100% | 5  | 4  |
| 100% | 100% | 5  | 7  |
| 100% | 100% | 13 | 13 |
| 100% | 100% | 13 | 12 |
| 100% | 100% | 6  | 6  |
| 100% | 100% | 6  | 2  |
| 100% | 100% | 2  | 2  |
| 100% | 100% | 5  | 7  |
| 100% | 0    | 1  | 2  |
| 100% | 50%  | 3  | 2  |
| 100% | 100% | 1  | 2  |
| 58%  | 50%  | 2  | 1  |
| 100% | 100% | 3  | 2  |
| 58%  | 100% | 1  | 1  |
| 100% | 100% | 10 | 9  |
| 100% | 100% | 4  | 4  |
| 58%  | 0    | 2  | 1  |
| 100% | 0    | 2  | 3  |
| 100% | 100% | 3  | 3  |
| 100% | 100% | 3  | 3  |
| 100% | 100% | 4  | 5  |
| 0    | 0    | 3  | 0  |

|      |      |    |    |
|------|------|----|----|
| 100% | 100% | 4  | 4  |
| 100% | 100% | 5  | 8  |
| 100% | 100% | 10 | 12 |
| 100% | 100% | 73 | 70 |
| 100% | 100% | 60 | 60 |
| 100% | 100% | 50 | 48 |
| 100% | 100% | 23 | 16 |
| 100% | 100% | 52 | 40 |
| 100% | 100% | 5  | 4  |
| 100% | 100% | 9  | 9  |
| 100% | 100% | 8  | 6  |
| 100% | 100% | 8  | 3  |
| 0    | 41%  | 2  | 0  |
| 100% | 100% | 3  | 3  |
| 100% | 100% | 5  | 5  |
| 100% | 100% | 20 | 19 |
| 100% | 100% | 4  | 6  |
| 100% | 100% | 3  | 3  |
| 100% | 100% | 4  | 2  |
| 100% | 100% | 5  | 2  |
| 100% | 100% | 9  | 8  |
| 100% | 100% | 21 | 17 |
| 100% | 0    | 1  | 2  |
| 99%  | 100% | 2  | 1  |
| 99%  | 50%  | 0  | 1  |
| 98%  | 0    | 0  | 1  |
| 58%  | 100% | 1  | 1  |
| 58%  | 100% | 2  | 1  |
| 58%  | 0    | 1  | 1  |
| 100% | 0    | 1  | 2  |
| 100% | 100% | 2  | 2  |
| 100% | 50%  | 3  | 2  |
| 100% | 100% | 6  | 5  |
| 0    | 100% | 8  | 0  |
| 0    | 50%  | 2  | 0  |
| 100% | 50%  | 2  | 4  |
| 58%  | 0    | 3  | 1  |
| 100% | 100% | 3  | 4  |
| 100% | 100% | 14 | 5  |
| 100% | 100% | 1  | 2  |
| 100% | 100% | 3  | 3  |
| 58%  | 100% | 2  | 1  |
| 100% | 100% | 5  | 6  |
| 100% | 50%  | 0  | 2  |
| 100% | 100% | 5  | 5  |
| 100% | 100% | 5  | 3  |
| 100% | 100% | 5  | 3  |
| 100% | 100% | 2  | 2  |
| 0    | 100% | 5  | 0  |
| 100% | 100% | 2  | 2  |
| 100% | 100% | 4  | 4  |
| 58%  | 100% | 1  | 1  |
| 100% | 100% | 6  | 4  |
| 100% | 50%  | 1  | 2  |
| 100% | 13%  | 0  | 2  |
| 100% | 100% | 5  | 6  |
| 100% | 100% | 1  | 2  |
| 100% | 100% | 6  | 5  |
| 100% | 0    | 1  | 2  |
| 100% | 100% | 15 | 15 |
| 100% | 0    | 1  | 2  |
| 58%  | 50%  | 2  | 1  |
| 100% | 50%  | 2  | 2  |

|      |      |    |    |
|------|------|----|----|
| 98%  | 50%  | 0  | 1  |
| 100% | 50%  | 2  | 2  |
| 100% | 100% | 5  | 3  |
| 100% | 100% | 3  | 2  |
| 100% | 100% | 4  | 4  |
| 98%  | 5%   | 0  | 1  |
| 100% | 100% | 4  | 5  |
| 100% | 100% | 4  | 3  |
| 0    | 0    | 1  | 0  |
| 100% | 0    | 0  | 2  |
| 100% | 100% | 0  | 13 |
| 100% | 100% | 2  | 2  |
| 58%  | 100% | 1  | 1  |
| 100% | 100% | 33 | 36 |
| 100% | 100% | 0  | 7  |
| 100% | 50%  | 4  | 2  |
| 100% | 100% | 4  | 2  |
| 100% | 100% | 15 | 9  |
| 100% | 100% | 3  | 3  |
| 100% | 0    | 4  | 4  |
| 100% | 100% | 3  | 3  |
| 58%  | 100% | 0  | 1  |
| 100% | 100% | 6  | 6  |
| 100% | 100% | 4  | 3  |
| 100% | 100% | 8  | 11 |
| 0    | 0    | 2  | 0  |
| 58%  | 0    | 2  | 1  |
| 0    | 100% | 5  | 0  |
| 100% | 100% | 21 | 19 |
| 100% | 100% | 5  | 3  |
| 0    | 50%  | 2  | 0  |
| 100% | 50%  | 1  | 2  |
| 0    | 0    | 3  | 0  |
| 100% | 100% | 4  | 3  |
| 0    | 100% | 3  | 0  |
| 58%  | 50%  | 2  | 1  |
| 100% | 100% | 15 | 11 |
| 100% | 100% | 0  | 3  |
| 0    | 0    | 3  | 0  |
| 100% | 0    | 4  | 4  |
| 100% | 100% | 11 | 10 |
| 0    | 0    | 1  | 0  |
| 100% | 100% | 9  | 6  |
| 100% | 100% | 9  | 6  |
| 100% | 100% | 1  | 2  |
| 100% | 100% | 1  | 4  |
| 58%  | 50%  | 5  | 1  |
| 100% | 100% | 4  | 5  |
| 100% | 100% | 4  | 4  |
| 100% | 100% | 12 | 10 |
| 100% | 100% | 4  | 4  |
| 100% | 100% | 1  | 2  |
| 0    | 50%  | 2  | 0  |
| 100% | 100% | 4  | 5  |
| 100% | 100% | 6  | 4  |
| 100% | 100% | 3  | 4  |
| 0    | 100% | 4  | 0  |
| 99%  | 0    | 0  | 1  |
| 100% | 100% | 2  | 3  |
| 100% | 98%  | 3  | 3  |
| 0    | 0    | 2  | 0  |
| 0    | 6%   | 2  | 0  |
| 100% | 100% | 17 | 17 |



|      |      |    |    |
|------|------|----|----|
| 100% | 100% | 7  | 9  |
| 100% | 100% | 3  | 3  |
| 8%   | 100% | 1  | 0  |
| 100% | 100% | 6  | 4  |
| 58%  | 50%  | 2  | 1  |
| 58%  | 0    | 2  | 1  |
| 0    | 0    | 2  | 0  |
| 100% | 100% | 5  | 5  |
| 100% | 100% | 9  | 10 |
| 100% | 100% | 16 | 14 |
| 58%  | 50%  | 2  | 1  |
| 0    | 100% | 1  | 0  |
| 100% | 100% | 1  | 2  |
| 100% | 100% | 22 | 22 |
| 58%  | 0    | 2  | 1  |
| 100% | 100% | 10 | 6  |
| 58%  | 99%  | 1  | 1  |
| 100% | 100% | 22 | 20 |
| 100% | 50%  | 3  | 1  |
| 100% | 100% | 22 | 22 |
| 100% | 100% | 3  | 2  |
| 100% | 100% | 11 | 11 |
| 100% | 100% | 6  | 7  |
| 100% | 100% | 9  | 9  |
| 100% | 100% | 10 | 9  |
| 7%   | 98%  | 3  | 0  |
| 58%  | 100% | 0  | 1  |
| 100% | 100% | 2  | 2  |
| 100% | 100% | 8  | 8  |
| 58%  | 99%  | 1  | 1  |
| 100% | 100% | 10 | 10 |
| 100% | 100% | 3  | 2  |
| 100% | 100% | 2  | 2  |
| 100% | 100% | 3  | 2  |
| 100% | 100% | 8  | 6  |
| 58%  | 98%  | 2  | 1  |
| 100% | 100% | 2  | 2  |
| 100% | 100% | 2  | 3  |
| 100% | 100% | 9  | 6  |
| 0    | 0    | 2  | 0  |
| 100% | 100% | 11 | 7  |
| 100% | 100% | 15 | 13 |
| 100% | 50%  | 3  | 3  |
| 100% | 100% | 3  | 2  |
| 100% | 100% | 2  | 3  |
| 54%  | 50%  | 3  | 0  |
| 100% | 100% | 3  | 3  |
| 0    | 50%  | 3  | 0  |
| 0    | 50%  | 5  | 0  |
| 100% | 0    | 2  | 2  |
| 0    | 50%  | 2  | 0  |
| 100% | 0    | 0  | 1  |
| 100% | 100% | 2  | 2  |
| 0    | 0    | 2  | 0  |
| 100% | 0    | 2  | 2  |
| 100% | 50%  | 3  | 5  |
| 100% | 50%  | 3  | 2  |
| 100% | 100% | 6  | 3  |
| 100% | 100% | 2  | 2  |
| 58%  | 0    | 1  | 1  |
| 58%  | 100% | 2  | 1  |
| 100% | 0    | 3  | 2  |
| 0    | 0    | 3  | 0  |

|      |      |    |    |
|------|------|----|----|
| 100% | 100% | 14 | 14 |
| 99%  | 100% | 5  | 1  |
| 100% | 98%  | 1  | 2  |
| 100% | 100% | 11 | 9  |
| 100% | 100% | 29 | 26 |
| 58%  | 50%  | 2  | 1  |
| 0    | 0    | 2  | 0  |
| 0    | 100% | 0  | 0  |
| 100% | 100% | 3  | 2  |
| 58%  | 100% | 1  | 1  |
| 100% | 100% | 2  | 2  |
| 100% | 0    | 0  | 2  |
| 0    | 100% | 4  | 0  |
| 100% | 100% | 4  | 5  |
| 100% | 100% | 5  | 4  |
| 58%  | 100% | 3  | 1  |
| 100% | 50%  | 2  | 3  |
| 100% | 100% | 3  | 1  |
| 0    | 0    | 5  | 0  |
| 58%  | 100% | 2  | 1  |
| 0    | 98%  | 1  | 0  |
| 100% | 100% | 6  | 3  |
| 100% | 50%  | 3  | 2  |
| 0    | 100% | 2  | 0  |
| 100% | 50%  | 1  | 2  |
| 58%  | 50%  | 3  | 1  |
| 100% | 50%  | 0  | 2  |
| 100% | 50%  | 3  | 3  |
| 0    | 0    | 3  | 0  |
| 100% | 100% | 2  | 2  |
| 100% | 0    | 0  | 2  |
| 58%  | 0    | 2  | 1  |
| 100% | 100% | 4  | 3  |
| 100% | 100% | 12 | 9  |
| 100% | 50%  | 2  | 2  |
| 100% | 100% | 15 | 10 |
| 100% | 100% | 5  | 3  |
| 100% | 100% | 2  | 2  |
| 100% | 0    | 3  | 2  |
| 100% | 100% | 0  | 2  |
| 100% | 100% | 2  | 2  |
| 100% | 100% | 8  | 9  |
| 100% | 100% | 2  | 3  |
| 58%  | 50%  | 2  | 1  |
| 100% | 100% | 18 | 19 |
| 100% | 100% | 6  | 4  |
| 58%  | 0    | 2  | 1  |
| 100% | 0    | 0  | 2  |
| 0    | 0    | 2  | 0  |
| 58%  | 100% | 2  | 1  |
| 0    | 100% | 4  | 0  |
| 100% | 100% | 4  | 4  |
| 58%  | 50%  | 2  | 1  |
| 100% | 50%  | 1  | 3  |
| 100% | 100% | 5  | 4  |
| 100% | 100% | 9  | 6  |
| 0    | 35%  | 2  | 0  |
| 100% | 100% | 2  | 2  |
| 58%  | 0    | 2  | 1  |
| 100% | 100% | 8  | 7  |
| 100% | 100% | 3  | 3  |
| 0    | 99%  | 0  | 0  |
| 100% | 100% | 7  | 7  |

|      |      |    |    |
|------|------|----|----|
| 58%  | 50%  | 2  | 1  |
| 58%  | 0    | 4  | 1  |
| 100% | 100% | 3  | 2  |
| 23%  | 100% | 2  | 0  |
| 100% | 100% | 3  | 2  |
| 100% | 100% | 17 | 18 |
| 100% | 100% | 13 | 14 |
| 100% | 100% | 14 | 12 |
| 58%  | 100% | 7  | 1  |
| 100% | 100% | 1  | 2  |
| 100% | 100% | 5  | 5  |
| 100% | 100% | 16 | 16 |
| 100% | 100% | 4  | 2  |
| 100% | 100% | 0  | 4  |
| 58%  | 0    | 3  | 1  |
| 0    | 0    | 2  | 0  |
| 100% | 0    | 3  | 3  |
| 100% | 100% | 5  | 3  |
| 100% | 0    | 0  | 2  |
| 100% | 100% | 5  | 4  |
| 100% | 100% | 6  | 5  |
| 100% | 100% | 2  | 5  |
| 100% | 100% | 6  | 4  |
| 58%  | 100% | 1  | 1  |
| 100% | 50%  | 2  | 2  |
| 100% | 100% | 5  | 5  |
| 58%  | 100% | 1  | 1  |
| 100% | 100% | 3  | 3  |
| 0    | 100% | 2  | 0  |
| 100% | 100% | 3  | 3  |
| 100% | 0    | 2  | 3  |
| 0    | 0    | 2  | 0  |
| 58%  | 100% | 1  | 1  |
| 100% | 100% | 7  | 7  |
| 100% | 100% | 5  | 5  |
| 100% | 100% | 5  | 8  |
| 100% | 100% | 3  | 3  |
| 100% | 100% | 6  | 10 |
| 100% | 100% | 29 | 29 |
| 100% | 50%  | 1  | 2  |
| 100% | 100% | 2  | 3  |
| 100% | 100% | 7  | 7  |
| 100% | 100% | 7  | 7  |
| 100% | 100% | 13 | 9  |
| 100% | 100% | 3  | 4  |
| 100% | 100% | 2  | 5  |
| 100% | 100% | 2  | 2  |
| 100% | 100% | 4  | 5  |
| 100% | 100% | 2  | 3  |
| 100% | 0    | 10 | 6  |
| 100% | 100% | 0  | 7  |
| 100% | 100% | 2  | 2  |
| 100% | 100% | 0  | 2  |
| 58%  | 50%  | 2  | 1  |
| 100% | 0    | 0  | 1  |
| 0    | 100% | 2  | 0  |
| 100% | 100% | 7  | 6  |
| 100% | 100% | 12 | 13 |
| 100% | 100% | 4  | 3  |
| 100% | 100% | 17 | 18 |
| 100% | 100% | 6  | 5  |
| 58%  | 0    | 2  | 1  |
| 0    | 98%  | 1  | 0  |

|      |      |    |    |
|------|------|----|----|
| 99%  | 100% | 1  | 1  |
| 100% | 100% | 12 | 7  |
| 58%  | 50%  | 3  | 1  |
| 0    | 100% | 2  | 0  |
| 100% | 100% | 6  | 8  |
| 58%  | 100% | 3  | 1  |
| 58%  | 100% | 1  | 1  |
| 100% | 100% | 6  | 4  |
| 100% | 50%  | 0  | 2  |
| 100% | 100% | 5  | 4  |
| 100% | 100% | 11 | 9  |
| 58%  | 100% | 1  | 1  |
| 0    | 100% | 0  | 0  |
| 100% | 100% | 2  | 2  |
| 100% | 0    | 1  | 2  |
| 100% | 100% | 13 | 10 |
| 100% | 100% | 3  | 3  |
| 100% | 100% | 12 | 12 |
| 100% | 100% | 6  | 7  |
| 100% | 100% | 15 | 14 |
| 100% | 100% | 2  | 2  |
| 58%  | 0    | 2  | 1  |
| 100% | 100% | 2  | 2  |
| 0    | 100% | 3  | 0  |
| 100% | 100% | 4  | 2  |
| 100% | 50%  | 3  | 2  |
| 100% | 100% | 4  | 3  |
| 100% | 100% | 8  | 7  |
| 100% | 100% | 0  | 2  |
| 100% | 100% | 5  | 3  |
| 0    | 0    | 3  | 0  |
| 100% | 100% | 2  | 2  |
| 100% | 100% | 3  | 1  |
| 58%  | 100% | 1  | 1  |
| 100% | 50%  | 3  | 2  |
| 100% | 100% | 7  | 5  |

| # Unique peptide H460-Rep3 (HT) | # Unique peptide Control | IPI                                             |
|---------------------------------|--------------------------|-------------------------------------------------|
| 1                               | 0                        | IPI00797738                                     |
| 2                               | 0                        | IPI00455527                                     |
| 0                               | 0                        | IPI00555602                                     |
| 0                               | 0                        | IPI00419827                                     |
| 3                               | 0                        | IPI00382617,IPI00477150                         |
| 1                               | 0                        | IPI00063827,IPI00747859                         |
| 6                               | 0                        | IPI00021290                                     |
| 2                               | 0                        | IPI00021428,IPI00023006                         |
| 17                              | 0                        | IPI00021440                                     |
| 0                               | 0                        | IPI00013508                                     |
| 8                               | 0                        | IPI00013808                                     |
| 0                               | 0                        | IPI00005159,IPI00470573,IPI00749250             |
| 4                               | 0                        | IPI00013897                                     |
| 0                               | 0                        | IPI00420067                                     |
| 3                               | 0                        | IPI00029606,IPI00288894                         |
| 0                               | 0                        | IPI00011901,IPI00249735                         |
| 0                               | 0                        | IPI00021903                                     |
| 7                               | 0                        | IPI00440932,IPI00440933,IPI00747759             |
| 3                               | 0                        | IPI00005908                                     |
| 6                               | 0                        | IPI00007427                                     |
| 39                              | 2                        | IPI00374563                                     |
| 3                               | 0                        | IPI00012007                                     |
| 3                               | 0                        | IPI00555610                                     |
| 1                               | 0                        | IPI00030706                                     |
| 1                               | 0                        | IPI00413641                                     |
| 12                              | 0                        | IPI00105407                                     |
| 0                               | 0                        | IPI00029733                                     |
| 5                               | 0                        | IPI00005668                                     |
| 4                               | 0                        | IPI00291483                                     |
| 0                               | 0                        | IPI00015102,IPI00783803,IPI00795504,IPI00807403 |
| 3                               | 0                        | IPI00296183,IPI00654709,IPI00795549,IPI00796116 |
| 16                              | 1                        | IPI00465439                                     |
| 0                               | 0                        | IPI00022426                                     |
| 4                               | 0                        | IPI00153060                                     |
| 0                               | 0                        | IPI00025849,IPI00449263                         |
| 2                               | 0                        | IPI00007423,IPI00759824                         |
| 1                               | 0                        | IPI00165393,IPI00640833                         |
| 4                               | 0                        | IPI00030431                                     |
| 8                               | 0                        | IPI00218918                                     |
| 6                               | 0                        | IPI00418169                                     |
| 0                               | 0                        | IPI00329801                                     |
| 5                               | 0                        | IPI00215911                                     |
| 8                               | 0                        | IPI00031030                                     |
| 3                               | 0                        | IPI00514157                                     |
| 19                              | 0                        | IPI00006608                                     |
| 2                               | 0                        | IPI00215914,IPI00215917                         |
| 2                               | 0                        | IPI00796541                                     |
| 0                               | 0                        | IPI00003327                                     |
| 0                               | 0                        | IPI00328748                                     |
| 0                               | 0                        | IPI00418446                                     |
| 0                               | 0                        | IPI00783284                                     |
| 2                               | 0                        | IPI00289499                                     |
| 5                               | 0                        | IPI00020430,IPI00784119,IPI00794988             |
| 4                               | 0                        | IPI00168884                                     |
| 0                               | 0                        | IPI00007812                                     |
| 1                               | 0                        | IPI00027235,IPI00478671                         |
| 0                               | 0                        | IPI00296992,IPI00397361                         |
| 4                               | 0                        | IPI00004656,IPI00796379                         |
| 1                               | 0                        | IPI00477470                                     |
| 5                               | 0                        | IPI00009997                                     |

|    |   |                                                   |
|----|---|---------------------------------------------------|
| 4  | 0 | IPI00759755                                       |
| 2  | 0 | IPI00746600                                       |
| 1  | 0 | IPI00030128                                       |
| 1  | 0 | IPI00641582                                       |
| 1  | 0 | IPI00299024                                       |
| 1  | 0 | IPI00220152                                       |
| 1  | 0 | IPI00025864                                       |
| 0  | 0 | IPI00012058                                       |
| 1  | 0 | IPI00294158                                       |
| 0  | 0 | IPI00014021                                       |
| 3  | 0 | IPI00218042                                       |
| 2  | 0 | IPI00301434                                       |
| 2  | 0 | IPI00795150                                       |
| 4  | 0 | IPI00026240,IPI00657860                           |
| 3  | 0 | IPI00218413,IPI00744685                           |
| 1  | 0 | IPI00419473                                       |
| 2  | 0 | IPI00012236                                       |
| 3  | 0 | IPI00056357                                       |
| 1  | 0 | IPI00014230                                       |
| 6  | 0 | IPI00296165                                       |
| 11 | 0 | IPI00017696                                       |
| 2  | 0 | IPI00165044,IPI00414183                           |
| 1  | 0 | IPI00395627                                       |
| 2  | 0 | IPI00075248,IPI00386621,IPI00794543               |
| 7  | 0 | IPI00020599                                       |
| 0  | 0 | IPI00014537                                       |
| 2  | 0 | IPI00100160                                       |
| 3  | 0 | IPI00103175                                       |
| 5  | 0 | IPI00020984                                       |
| 1  | 0 | IPI00005969                                       |
| 0  | 0 | IPI00218782,IPI00642256                           |
| 2  | 0 | IPI00760715,IPI00761035,IPI00761069,IPI00761140,I |
| 4  | 0 | IPI00295386                                       |
| 0  | 0 | IPI00010320                                       |
| 3  | 0 | IPI00297579                                       |
| 2  | 0 | IPI00260630                                       |
| 4  | 0 | IPI00297779                                       |
| 3  | 0 | IPI00302927                                       |
| 2  | 0 | IPI00010720                                       |
| 2  | 0 | IPI00018465                                       |
| 0  | 0 | IPI00302925,IPI00784090                           |
| 6  | 0 | IPI00152540                                       |
| 1  | 0 | IPI00029260                                       |
| 1  | 0 | IPI00305064,IPI00418465,IPI00419219,IPI00827555,I |
| 7  | 0 | IPI00216550                                       |
| 1  | 0 | IPI00031713                                       |
| 3  | 0 | IPI00000190                                       |
| 0  | 0 | IPI00295399                                       |
| 12 | 0 | IPI00293539                                       |
| 3  | 0 | IPI00024046                                       |
| 4  | 0 | IPI00165972                                       |
| 31 | 0 | IPI00029739                                       |
| 2  | 0 | IPI00654723                                       |
| 4  | 0 | IPI00012011                                       |
| 3  | 0 | IPI00783540                                       |
| 0  | 0 | IPI00333010                                       |
| 12 | 0 | IPI00746813                                       |
| 0  | 0 | IPI00216738                                       |
| 3  | 0 | IPI00301185,IPI00306719                           |
| 4  | 0 | IPI00783390                                       |
| 4  | 0 | IPI00299059                                       |
| 1  | 0 | IPI00465319                                       |
| 1  | 0 | IPI00180954,IPI00641579,IPI00646241               |

|    |   |                                                 |
|----|---|-------------------------------------------------|
| 2  | 0 | IPI00022977                                     |
| 5  | 0 | IPI00033466                                     |
| 4  | 0 | IPI00010896                                     |
| 1  | 0 | IPI00291930,IPI00397519                         |
| 17 | 0 | IPI00007257                                     |
| 10 | 0 | IPI00024067,IPI00455383                         |
| 19 | 0 | IPI00291262,IPI00400826,IPI00795633             |
| 0  | 0 | IPI00430813                                     |
| 0  | 0 | IPI00165579,IPI00177728,IPI00646632             |
| 0  | 0 | IPI00029751                                     |
| 5  | 0 | IPI00012386,IPI00791735                         |
| 0  | 0 | IPI00743696                                     |
| 2  | 0 | IPI00306322                                     |
| 2  | 0 | IPI00472200                                     |
| 1  | 0 | IPI00477611                                     |
| 21 | 0 | IPI00748917                                     |
| 17 | 0 | IPI00291136                                     |
| 1  | 0 | IPI00219000                                     |
| 0  | 0 | IPI00295851                                     |
| 0  | 0 | IPI00008453                                     |
| 1  | 0 | IPI00011062                                     |
| 5  | 0 | IPI00301395                                     |
| 3  | 0 | IPI00021997                                     |
| 4  | 0 | IPI00009294                                     |
| 1  | 0 | IPI00027806                                     |
| 3  | 0 | IPI00289561                                     |
| 3  | 0 | IPI00220959,IPI00748502,IPI00793277             |
| 2  | 0 | IPI00022744,IPI00219994                         |
| 2  | 0 | IPI00015881                                     |
| 3  | 0 | IPI00442073                                     |
| 10 | 0 | IPI00032293                                     |
| 3  | 0 | IPI00021828                                     |
| 1  | 0 | IPI00007778,IPI00643023                         |
| 17 | 2 | IPI00020977                                     |
| 3  | 0 | IPI00791457                                     |
| 4  | 0 | IPI00295741                                     |
| 14 | 0 | IPI00022810                                     |
| 15 | 0 | IPI00011229                                     |
| 12 | 1 | IPI00012887                                     |
| 5  | 0 | IPI00002745                                     |
| 2  | 0 | IPI00554634                                     |
| 5  | 0 | IPI00013874                                     |
| 5  | 0 | IPI00292936                                     |
| 3  | 0 | IPI00465315                                     |
| 3  | 0 | IPI00299219                                     |
| 4  | 0 | IPI00044326                                     |
| 9  | 0 | IPI00028911                                     |
| 2  | 0 | IPI00010182,IPI00218836,IPI00815745             |
| 0  | 0 | IPI00293867                                     |
| 1  | 0 | IPI00015953                                     |
| 0  | 0 | IPI00215637                                     |
| 2  | 0 | IPI00742905                                     |
| 2  | 0 | IPI00398918                                     |
| 2  | 0 | IPI00008454                                     |
| 0  | 0 | IPI00024523                                     |
| 0  | 0 | IPI00006713                                     |
| 2  | 0 | IPI00333140,IPI00783545                         |
| 1  | 0 | IPI00146935,IPI00235412,IPI00473085,IPI00555883 |
| 3  | 0 | IPI00257508                                     |
| 2  | 0 | IPI00025846,IPI00220146                         |
| 4  | 0 | IPI00028931                                     |
| 1  | 0 | IPI00031045,IPI00473014,IPI00643237             |
| 3  | 0 | IPI00013679,IPI00749113,IPI00793322             |

|    |   |                                                   |
|----|---|---------------------------------------------------|
| 1  | 0 | IPI00456969,IPI00477531                           |
| 0  | 0 | IPI00019329                                       |
| 14 | 0 | IPI00003351,IPI00645849                           |
| 1  | 0 | IPI00306046,IPI00399105                           |
| 9  | 0 | IPI00396485                                       |
| 3  | 0 | IPI00014424                                       |
| 2  | 0 | IPI00178440                                       |
| 1  | 0 | IPI00642971                                       |
| 5  | 0 | IPI00000875,IPI00747497                           |
| 18 | 0 | IPI00186290                                       |
| 19 | 0 | IPI00029658,IPI00220813,IPI00220814,IPI00220815   |
| 1  | 0 | IPI00060181                                       |
| 1  | 0 | IPI00005517                                       |
| 0  | 0 | IPI00015077                                       |
| 2  | 0 | IPI00219678                                       |
| 3  | 0 | IPI00297982                                       |
| 0  | 0 | IPI00290461                                       |
| 1  | 0 | IPI00290460                                       |
| 0  | 0 | IPI00654777                                       |
| 1  | 0 | IPI00465233                                       |
| 1  | 0 | IPI00012079,IPI00439415                           |
| 1  | 0 | IPI00783643                                       |
| 0  | 0 | IPI00220365,IPI00384463,IPI00479262,IPI00798400   |
| 0  | 0 | IPI00411704                                       |
| 1  | 0 | IPI00374054,IPI00411623,IPI00646954               |
| 22 | 0 | IPI00465248                                       |
| 3  | 0 | IPI00156171,IPI00303210                           |
| 0  | 0 | IPI00478478                                       |
| 2  | 0 | IPI00032230                                       |
| 1  | 0 | IPI00008318                                       |
| 2  | 0 | IPI00008290,IPI00215945                           |
| 2  | 0 | IPI00013452                                       |
| 3  | 0 | IPI00024911                                       |
| 2  | 0 | IPI00015186                                       |
| 1  | 0 | IPI00009841,IPI00065554                           |
| 2  | 0 | IPI00293128                                       |
| 2  | 0 | IPI00002732,IPI00790204                           |
| 2  | 0 | IPI00456750,IPI00647286                           |
| 3  | 0 | IPI00006657                                       |
| 5  | 0 | IPI00021923                                       |
| 0  | 0 | IPI00031820                                       |
| 30 | 0 | IPI00645907                                       |
| 4  | 0 | IPI00031411                                       |
| 1  | 0 | IPI00296537                                       |
| 6  | 0 | IPI00296534                                       |
| 7  | 0 | IPI00328113,IPI00784458                           |
| 6  | 0 | IPI00019439,IPI00784315                           |
| 2  | 0 | IPI00101405,IPI00797614                           |
| 1  | 0 | IPI00021048,IPI00216269,IPI00385318,IPI00645867,I |
| 0  | 0 | IPI00296053,IPI00759715                           |
| 1  | 0 | IPI00303300                                       |
| 2  | 0 | IPI00024157                                       |
| 3  | 0 | IPI00219005                                       |
| 0  | 0 | IPI00059292,IPI00219306,IPI00513955,IPI00745029   |
| 1  | 0 | IPI00002191                                       |
| 36 | 0 | IPI00302592                                       |
| 18 | 0 | IPI00289334,IPI00382696,IPI00477536               |
| 2  | 0 | IPI00470919                                       |
| 0  | 0 | IPI00744362                                       |
| 84 | 0 | IPI00022418                                       |
| 2  | 0 | IPI00163187,IPI00747810                           |
| 3  | 0 | IPI00021081,IPI00217070,IPI00217071               |
| 13 | 0 | IPI00029723                                       |



|    |   |                                                   |
|----|---|---------------------------------------------------|
| 4  | 0 | IPI00025155                                       |
| 26 | 0 | IPI00477747                                       |
| 2  | 0 | IPI00298956                                       |
| 2  | 0 | IPI00375441,IPI00644386,IPI00788671               |
| 1  | 0 | IPI00745745                                       |
| 2  | 0 | IPI00012440                                       |
| 3  | 0 | IPI00260715                                       |
| 1  | 0 | IPI00012442                                       |
| 16 | 0 | IPI00760751                                       |
| 3  | 0 | IPI00783446                                       |
| 5  | 0 | IPI00026637                                       |
| 9  | 0 | IPI00008790                                       |
| 1  | 0 | IPI00183321                                       |
| 1  | 0 | IPI00029605                                       |
| 1  | 0 | IPI00375205,IPI00456479                           |
| 7  | 0 | IPI00004669                                       |
| 0  | 0 | IPI00005401                                       |
| 2  | 0 | IPI00328391                                       |
| 5  | 0 | IPI00166613                                       |
| 16 | 0 | IPI00011454                                       |
| 12 | 2 | IPI00219018                                       |
| 1  | 0 | IPI00465260,IPI00783097                           |
| 0  | 0 | IPI00032532,IPI00412410,IPI00412412               |
| 8  | 0 | IPI00021807,IPI00759616                           |
| 0  | 0 | IPI00296635                                       |
| 0  | 0 | IPI00306140                                       |
| 2  | 0 | IPI00010090                                       |
| 0  | 0 | IPI00001159                                       |
| 0  | 0 | IPI00166086                                       |
| 3  | 0 | IPI00465184                                       |
| 5  | 0 | IPI00306543                                       |
| 0  | 0 | IPI00640006                                       |
| 8  | 0 | IPI00023728                                       |
| 8  | 0 | IPI00025869                                       |
| 5  | 0 | IPI00441344,IPI00797646                           |
| 2  | 0 | IPI00433284                                       |
| 3  | 0 | IPI00219025                                       |
| 2  | 0 | IPI00168262                                       |
| 3  | 0 | IPI00018236                                       |
| 1  | 0 | IPI00029079                                       |
| 3  | 0 | IPI00641950                                       |
| 2  | 0 | IPI00000137                                       |
| 1  | 0 | IPI00012102                                       |
| 13 | 0 | IPI00171411,IPI00759659,IPI00784293               |
| 2  | 0 | IPI00219029                                       |
| 0  | 0 | IPI00018206                                       |
| 10 | 0 | IPI00015688                                       |
| 0  | 0 | IPI00001755                                       |
| 9  | 0 | IPI00027497                                       |
| 2  | 0 | IPI00150961,IPI00783872                           |
| 4  | 0 | IPI00217481,IPI00423340,IPI00423342,IPI00651640,I |
| 4  | 0 | IPI00026199                                       |
| 4  | 0 | IPI00328709                                       |
| 2  | 0 | IPI00296713                                       |
| 7  | 0 | IPI00026314                                       |
| 3  | 0 | IPI00016862,IPI00759575                           |
| 4  | 1 | IPI00219757                                       |
| 3  | 0 | IPI00290416                                       |
| 2  | 0 | IPI00021808                                       |
| 7  | 0 | IPI00453476                                       |
| 6  | 0 | IPI00514127                                       |
| 0  | 0 | IPI00022228                                       |
| 3  | 0 | IPI00027851                                       |

|    |   |                                                   |
|----|---|---------------------------------------------------|
| 8  | 0 | IPI00012585                                       |
| 2  | 0 | IPI00239077                                       |
| 2  | 0 | IPI00081836,IPI00102165,IPI00216457,IPI00220855,I |
| 1  | 0 | IPI00152906,IPI00303133,IPI00329665,IPI00719084,I |
| 3  | 0 | IPI00453473                                       |
| 11 | 0 | IPI00742968                                       |
| 4  | 0 | IPI00472882                                       |
| 5  | 0 | IPI00471951,IPI00816057                           |
| 0  | 0 | IPI00651697                                       |
| 5  | 0 | IPI00815806                                       |
| 1  | 0 | IPI00217477,IPI00411540,IPI00640781,IPI00643317   |
| 2  | 0 | IPI00007764,IPI00384857                           |
| 9  | 0 | IPI00215965,IPI00465365,IPI00797148               |
| 12 | 1 | IPI00396378,IPI00414696                           |
| 3  | 0 | IPI00334713                                       |
| 2  | 0 | IPI00216592,IPI00477313,IPI00759596               |
| 2  | 0 | IPI00011274,IPI00045498                           |
| 1  | 0 | IPI00003881                                       |
| 1  | 0 | IPI00479191                                       |
| 2  | 0 | IPI00514561,IPI00807545                           |
| 2  | 0 | IPI00027834,IPI00796199                           |
| 1  | 0 | IPI00171903,IPI00383296                           |
| 4  | 0 | IPI00479217,IPI00644079                           |
| 1  | 0 | IPI00218493                                       |
| 2  | 0 | IPI00157454,IPI00160316,IPI00395692               |
| 29 | 0 | IPI00382470                                       |
| 12 | 0 | IPI00334775                                       |
| 10 | 0 | IPI00027230                                       |
| 16 | 0 | IPI00304925,IPI00807640                           |
| 6  | 0 | IPI00002966                                       |
| 24 | 0 | IPI00003362                                       |
| 27 | 1 | IPI00003865                                       |
| 1  | 0 | IPI00007765                                       |
| 10 | 0 | IPI00472102,IPI00784154                           |
| 3  | 0 | IPI00220362                                       |
| 69 | 0 | IPI00024284                                       |
| 5  | 0 | IPI00218993,IPI00514983                           |
| 8  | 0 | IPI00003176                                       |
| 2  | 0 | IPI00168847,IPI00178140                           |
| 3  | 0 | IPI00000877                                       |
| 1  | 0 | IPI00220373                                       |
| 6  | 0 | IPI00027223                                       |
| 6  | 0 | IPI00289819                                       |
| 13 | 2 | IPI00297284                                       |
| 14 | 0 | IPI00018305,IPI00556155                           |
| 7  | 0 | IPI00029235                                       |
| 4  | 0 | IPI00016915                                       |
| 1  | 0 | IPI00291987                                       |
| 5  | 0 | IPI00007793                                       |
| 0  | 0 | IPI00297124                                       |
| 1  | 0 | IPI00005198                                       |
| 2  | 0 | IPI00298788,IPI00418313                           |
| 1  | 0 | IPI00291510                                       |
| 2  | 0 | IPI00009342                                       |
| 2  | 0 | IPI00010105                                       |
| 8  | 0 | IPI00640865                                       |
| 5  | 0 | IPI00031821                                       |
| 0  | 0 | IPI00008575,IPI00082310,IPI00385834,IPI00479209   |
| 0  | 0 | IPI00298363                                       |
| 5  | 0 | IPI00015504                                       |
| 3  | 0 | IPI00002214                                       |
| 4  | 0 | IPI00001639                                       |
| 0  | 0 | IPI00217963                                       |

|    |   |                                                 |
|----|---|-------------------------------------------------|
| 2  | 0 | IPI00479145                                     |
| 5  | 0 | IPI00003818                                     |
| 12 | 0 | IPI00027087,IPI00334532,IPI00646281             |
| 74 | 0 | IPI00375294                                     |
| 59 | 0 | IPI00783665                                     |
| 54 | 0 | IPI00013976                                     |
| 18 | 0 | IPI00296922                                     |
| 51 | 0 | IPI00298281                                     |
| 3  | 0 | IPI00009650                                     |
| 11 | 0 | IPI00217966                                     |
| 7  | 0 | IPI00219217                                     |
| 6  | 0 | IPI00000070                                     |
| 0  | 0 | IPI00045839                                     |
| 3  | 0 | IPI00219219                                     |
| 5  | 0 | IPI00465431                                     |
| 19 | 0 | IPI00023673                                     |
| 3  | 0 | IPI00293303                                     |
| 2  | 0 | IPI00007207,IPI00446007,IPI00748567             |
| 3  | 0 | IPI00005686                                     |
| 2  | 0 | IPI00026530                                     |
| 8  | 0 | IPI00009950                                     |
| 16 | 0 | IPI00021405                                     |
| 0  | 0 | IPI00217975                                     |
| 2  | 0 | IPI00399212,IPI00414127                         |
| 1  | 0 | IPI00456898                                     |
| 0  | 0 | IPI00740545                                     |
| 2  | 0 | IPI00007797                                     |
| 2  | 0 | IPI00294839,IPI00782994                         |
| 0  | 0 | IPI00045841                                     |
| 0  | 0 | IPI00005774                                     |
| 2  | 0 | IPI00219077,IPI00514090                         |
| 1  | 0 | IPI00292657                                     |
| 2  | 0 | IPI00073196,IPI00398794                         |
| 9  | 0 | IPI00783492                                     |
| 1  | 0 | IPI00216804                                     |
| 1  | 0 | IPI00020986,IPI00794403                         |
| 0  | 0 | IPI00301459                                     |
| 2  | 0 | IPI00008207                                     |
| 10 | 0 | IPI00003802                                     |
| 3  | 0 | IPI00008868,IPI00374770                         |
| 2  | 0 | IPI00017596                                     |
| 3  | 0 | IPI00010157                                     |
| 4  | 0 | IPI00005690                                     |
| 1  | 0 | IPI00017297,IPI00789551                         |
| 4  | 0 | IPI00016334                                     |
| 3  | 0 | IPI00291005                                     |
| 5  | 0 | IPI00291006                                     |
| 3  | 0 | IPI00010333                                     |
| 2  | 0 | IPI00008215                                     |
| 2  | 0 | IPI00399089                                     |
| 5  | 0 | IPI00029273,IPI00792387                         |
| 2  | 0 | IPI00300763,IPI00789396                         |
| 6  | 0 | IPI00002236                                     |
| 1  | 0 | IPI00025809                                     |
| 0  | 0 | IPI00395751,IPI00744230                         |
| 5  | 0 | IPI00020407                                     |
| 2  | 0 | IPI00293276                                     |
| 8  | 0 | IPI00293748                                     |
| 0  | 0 | IPI00004233                                     |
| 14 | 0 | IPI00008561                                     |
| 0  | 0 | IPI00013405                                     |
| 1  | 0 | IPI00033494,IPI00220573,IPI00604523,IPI00719669 |
| 1  | 0 | IPI00219365                                     |

|    |   |                                                   |
|----|---|---------------------------------------------------|
| 1  | 0 | IPI00011876                                       |
| 1  | 0 | IPI00179589                                       |
| 3  | 0 | IPI00019502                                       |
| 2  | 0 | IPI00789605                                       |
| 4  | 0 | IPI00797126                                       |
| 0  | 0 | IPI00008787                                       |
| 5  | 0 | IPI00023860,IPI00789029,IPI00791065,IPI00793389   |
| 3  | 0 | IPI00179953,IPI00332499                           |
| 0  | 0 | IPI00555628                                       |
| 0  | 0 | IPI00019380                                       |
| 15 | 0 | IPI00827674                                       |
| 2  | 0 | IPI00020008                                       |
| 2  | 0 | IPI00002525                                       |
| 34 | 0 | IPI00028908                                       |
| 7  | 0 | IPI00795292                                       |
| 1  | 0 | IPI00329352                                       |
| 4  | 0 | IPI00304596                                       |
| 11 | 0 | IPI00029819                                       |
| 4  | 0 | IPI00011140                                       |
| 0  | 0 | IPI00017672                                       |
| 2  | 0 | IPI00301579                                       |
| 3  | 0 | IPI00026216                                       |
| 6  | 0 | IPI00220740,IPI00549248                           |
| 3  | 0 | IPI00619898                                       |
| 12 | 0 | IPI00333778                                       |
| 0  | 0 | IPI00165438,IPI00299594,IPI00398715,IPI00549340,I |
| 0  | 0 | IPI00100197,IPI00397571                           |
| 2  | 0 | IPI00385236                                       |
| 24 | 0 | IPI00295542,IPI00790899                           |
| 3  | 0 | IPI00009123                                       |
| 1  | 0 | IPI00550746                                       |
| 1  | 0 | IPI00646917                                       |
| 0  | 0 | IPI00009901                                       |
| 5  | 0 | IPI00328703                                       |
| 2  | 0 | IPI00017841,IPI00419820,IPI00472517,IPI00550145   |
| 1  | 0 | IPI00184375                                       |
| 19 | 0 | IPI00385326                                       |
| 3  | 0 | IPI00186581                                       |
| 0  | 0 | IPI00398855                                       |
| 0  | 0 | IPI00009923                                       |
| 9  | 0 | IPI00010796                                       |
| 0  | 0 | IPI00748022,IPI00786945                           |
| 4  | 0 | IPI00299000,IPI00794875                           |
| 7  | 0 | IPI00796945                                       |
| 3  | 0 | IPI00217223                                       |
| 5  | 0 | IPI00177543                                       |
| 1  | 0 | IPI00001869,IPI00513756                           |
| 5  | 0 | IPI00298547                                       |
| 2  | 0 | IPI00449049                                       |
| 13 | 0 | IPI00018873                                       |
| 5  | 0 | IPI00016610                                       |
| 2  | 0 | IPI00012066                                       |
| 1  | 0 | IPI00024989,IPI00411680,IPI00828189               |
| 3  | 0 | IPI00021700                                       |
| 4  | 0 | IPI00002543                                       |
| 3  | 0 | IPI00002280                                       |
| 3  | 0 | IPI00165229,IPI00294862                           |
| 0  | 0 | IPI00013297                                       |
| 2  | 0 | IPI00025277                                       |
| 0  | 0 | IPI00246058                                       |
| 0  | 0 | IPI00099977                                       |
| 0  | 0 | IPI00006236                                       |
| 21 | 0 | IPI00025252                                       |

|    |   |                                     |
|----|---|-------------------------------------|
| 8  | 0 | IPI00009904                         |
| 4  | 0 | IPI00299571,IPI00644989             |
| 2  | 0 | IPI00007935                         |
| 8  | 0 | IPI00219446                         |
| 1  | 0 | IPI00006052                         |
| 0  | 0 | IPI00015891                         |
| 0  | 0 | IPI00643196                         |
| 6  | 0 | IPI00216691                         |
| 9  | 0 | IPI00219525                         |
| 16 | 2 | IPI00169383                         |
| 1  | 0 | IPI00550364                         |
| 2  | 0 | IPI00220739                         |
| 2  | 0 | IPI00012575                         |
| 28 | 3 | IPI00479186                         |
| 0  | 0 | IPI00011588                         |
| 12 | 0 | IPI00019590                         |
| 1  | 0 | IPI00014898,IPI00186711,IPI00398002 |
| 22 | 0 | IPI00027192                         |
| 1  | 0 | IPI00337495,IPI00472165             |
| 27 | 0 | IPI00030255                         |
| 3  | 0 | IPI00216694                         |
| 13 | 1 | IPI00643034                         |
| 6  | 0 | IPI00015018                         |
| 8  | 0 | IPI00419585                         |
| 9  | 0 | IPI00646304                         |
| 1  | 0 | IPI00026519                         |
| 3  | 0 | IPI00398922                         |
| 3  | 0 | IPI00419307,IPI00554737             |
| 8  | 0 | IPI00002412                         |
| 1  | 0 | IPI00399307                         |
| 13 | 1 | IPI00000874                         |
| 3  | 0 | IPI00027350                         |
| 2  | 0 | IPI00024919                         |
| 4  | 0 | IPI00011937                         |
| 7  | 0 | IPI00220301                         |
| 1  | 0 | IPI00026154,IPI00792916             |
| 2  | 0 | IPI00064328,IPI00441473             |
| 3  | 0 | IPI00009276                         |
| 7  | 0 | IPI00294004                         |
| 0  | 0 | IPI00004968                         |
| 12 | 0 | IPI00026941                         |
| 16 | 0 | IPI00744835                         |
| 1  | 0 | IPI00001734                         |
| 3  | 0 | IPI00016832,IPI00472442             |
| 4  | 0 | IPI00219622                         |
| 1  | 0 | IPI00291922                         |
| 2  | 0 | IPI00029623                         |
| 1  | 0 | IPI00218372                         |
| 1  | 0 | IPI00025019                         |
| 0  | 0 | IPI00028006                         |
| 1  | 0 | IPI00028004                         |
| 0  | 0 | IPI00555956                         |
| 2  | 0 | IPI00003217                         |
| 0  | 0 | IPI00299608                         |
| 0  | 0 | IPI00105598                         |
| 1  | 0 | IPI00030154                         |
| 1  | 0 | IPI00384051,IPI00746205             |
| 5  | 0 | IPI00179964,IPI00183626,IPI00334175 |
| 2  | 0 | IPI00790462                         |
| 0  | 0 | IPI00022048                         |
| 3  | 0 | IPI00107831,IPI00465186,IPI00642154 |
| 0  | 0 | IPI00029568                         |
| 0  | 0 | IPI00219426                         |

|    |   |                                                 |
|----|---|-------------------------------------------------|
| 12 | 0 | IPI00787655                                     |
| 1  | 0 | IPI00004358                                     |
| 1  | 0 | IPI00470525                                     |
| 12 | 0 | IPI00003919                                     |
| 28 | 1 | IPI00003590                                     |
| 1  | 0 | IPI00376394,IPI00479085,IPI00783371             |
| 0  | 0 | IPI00008223                                     |
| 5  | 0 | IPI00643041,IPI00795671,IPI00796462             |
| 4  | 0 | IPI00646512                                     |
| 2  | 0 | IPI00024320                                     |
| 2  | 0 | IPI00304692                                     |
| 0  | 0 | IPI00001661                                     |
| 2  | 0 | IPI00027500,IPI00478231                         |
| 4  | 1 | IPI00029699                                     |
| 4  | 0 | IPI00008554                                     |
| 4  | 0 | IPI00414896                                     |
| 1  | 0 | IPI00642211                                     |
| 3  | 0 | IPI00412579,IPI00827508                         |
| 0  | 0 | IPI00024933                                     |
| 4  | 0 | IPI00008530,IPI00556485                         |
| 1  | 0 | IPI00008527                                     |
| 5  | 0 | IPI00008529                                     |
| 1  | 0 | IPI00013917                                     |
| 2  | 0 | IPI00017448,IPI00387084,IPI00797280             |
| 1  | 0 | IPI00011253                                     |
| 1  | 0 | IPI00217030                                     |
| 1  | 0 | IPI00013415                                     |
| 1  | 0 | IPI00413108,IPI00553164                         |
| 0  | 0 | IPI00215743                                     |
| 2  | 0 | IPI00013895,IPI00790691                         |
| 0  | 0 | IPI00012426                                     |
| 0  | 0 | IPI00217435,IPI00747808                         |
| 2  | 0 | IPI00299086                                     |
| 12 | 0 | IPI00106646                                     |
| 1  | 0 | IPI00170635                                     |
| 8  | 0 | IPI00031510                                     |
| 3  | 0 | IPI00028213,IPI00783087                         |
| 3  | 0 | IPI00004494                                     |
| 0  | 0 | IPI00014177,IPI00792151                         |
| 3  | 0 | IPI00784808                                     |
| 3  | 0 | IPI00410693,IPI00412714,IPI00470497,IPI00470498 |
| 11 | 0 | IPI00007117                                     |
| 2  | 0 | IPI00783625                                     |
| 1  | 0 | IPI00032139                                     |
| 18 | 0 | IPI00009890                                     |
| 5  | 0 | IPI00072377                                     |
| 0  | 0 | IPI00017451                                     |
| 0  | 0 | IPI00029764                                     |
| 0  | 0 | IPI00026089                                     |
| 1  | 0 | IPI00017339                                     |
| 3  | 0 | IPI00013890                                     |
| 5  | 0 | IPI00010740                                     |
| 1  | 0 | IPI00003377                                     |
| 1  | 0 | IPI00017480                                     |
| 7  | 0 | IPI00010949                                     |
| 7  | 0 | IPI00296197                                     |
| 0  | 0 | IPI00647217                                     |
| 2  | 0 | IPI00301364                                     |
| 0  | 0 | IPI00220194                                     |
| 6  | 0 | IPI00554702,IPI00604710                         |
| 2  | 0 | IPI00221393                                     |
| 1  | 0 | IPI00008580                                     |
| 7  | 0 | IPI00301812                                     |

|    |   |                                                   |
|----|---|---------------------------------------------------|
| 1  | 0 | IPI00140420                                       |
| 0  | 0 | IPI00027285,IPI00220360,IPI00384173,IPI00785142,I |
| 2  | 0 | IPI00302850                                       |
| 2  | 0 | IPI00017964                                       |
| 3  | 0 | IPI00218733,IPI00783680                           |
| 17 | 0 | IPI00005292                                       |
| 15 | 0 | IPI00021000,IPI00385896                           |
| 11 | 0 | IPI00478292,IPI00744706,IPI00745092               |
| 4  | 0 | IPI00005614                                       |
| 2  | 0 | IPI00783357,IPI00784104                           |
| 6  | 0 | IPI00019372                                       |
| 14 | 0 | IPI00289795                                       |
| 2  | 0 | IPI00004446                                       |
| 2  | 0 | IPI00168554                                       |
| 0  | 0 | IPI00009032                                       |
| 0  | 0 | IPI00005154                                       |
| 0  | 0 | IPI00032826                                       |
| 5  | 0 | IPI00009629                                       |
| 0  | 0 | IPI00020201                                       |
| 4  | 0 | IPI00005564                                       |
| 6  | 0 | IPI00008780                                       |
| 3  | 0 | IPI00299299                                       |
| 5  | 0 | IPI00013894                                       |
| 2  | 0 | IPI00744618                                       |
| 1  | 0 | IPI00171412,IPI00334514,IPI00783919               |
| 4  | 0 | IPI00018140                                       |
| 2  | 0 | IPI00020194,IPI00294426                           |
| 3  | 0 | IPI00647915                                       |
| 2  | 0 | IPI00744692                                       |
| 2  | 0 | IPI00329633                                       |
| 0  | 0 | IPI00217236                                       |
| 0  | 0 | IPI00247871,IPI00744062                           |
| 2  | 0 | IPI00290566                                       |
| 6  | 0 | IPI00021834                                       |
| 6  | 0 | IPI00009198                                       |
| 7  | 0 | IPI00022462                                       |
| 4  | 0 | IPI00000075                                       |
| 9  | 0 | IPI00235354                                       |
| 32 | 0 | IPI00018219                                       |
| 1  | 0 | IPI00329535                                       |
| 2  | 0 | IPI00328840                                       |
| 7  | 0 | IPI00032292                                       |
| 8  | 0 | IPI00788747                                       |
| 15 | 0 | IPI00643920,IPI00788802                           |
| 4  | 0 | IPI00216230                                       |
| 3  | 0 | IPI00298362                                       |
| 6  | 0 | IPI00024364                                       |
| 3  | 0 | IPI00023137,IPI00477672                           |
| 3  | 0 | IPI00301631                                       |
| 0  | 0 | IPI00465028                                       |
| 9  | 0 | IPI00479185                                       |
| 2  | 0 | IPI00010779                                       |
| 2  | 0 | IPI00022970,IPI00742682                           |
| 1  | 0 | IPI00009943,IPI00550900                           |
| 0  | 0 | IPI00030275                                       |
| 2  | 0 | IPI00438229,IPI00438230                           |
| 8  | 0 | IPI00641368                                       |
| 13 | 0 | IPI00792677                                       |
| 4  | 0 | IPI00011654                                       |
| 17 | 0 | IPI00007752                                       |
| 5  | 0 | IPI00216298                                       |
| 0  | 0 | IPI00026328                                       |
| 1  | 0 | IPI00401264                                       |

|    |   |                                                   |
|----|---|---------------------------------------------------|
| 2  | 0 | IPI00008552                                       |
| 10 | 0 | IPI00743646,IPI00783641                           |
| 1  | 0 | IPI00746657                                       |
| 2  | 0 | IPI00456429,IPI00719280,IPI00743241,IPI00743650,I |
| 6  | 0 | IPI00645078                                       |
| 2  | 0 | IPI00021347                                       |
| 2  | 0 | IPI00003949,IPI00796342                           |
| 8  | 0 | IPI00018352                                       |
| 1  | 0 | IPI00219512,IPI00219513,IPI00299313,IPI00549820,I |
| 4  | 0 | IPI00024466,IPI00619903                           |
| 12 | 0 | IPI00031420                                       |
| 4  | 0 | IPI00410544,IPI00657807                           |
| 2  | 0 | IPI00000873,IPI00829641                           |
| 3  | 0 | IPI00395488,IPI00745461                           |
| 0  | 0 | IPI00307162                                       |
| 12 | 0 | IPI00022774                                       |
| 2  | 0 | IPI00028076                                       |
| 11 | 0 | IPI00069058                                       |
| 6  | 0 | IPI00746388                                       |
| 16 | 1 | IPI00418471                                       |
| 4  | 0 | IPI00180759,IPI00784236,IPI00785025               |
| 0  | 0 | IPI00018931                                       |
| 2  | 0 | IPI00396383                                       |
| 4  | 0 | IPI00412737                                       |
| 2  | 0 | IPI00022052                                       |
| 1  | 0 | IPI00298961,IPI00784388                           |
| 3  | 0 | IPI00220834                                       |
| 5  | 0 | IPI00465430,IPI00644712                           |
| 2  | 0 | IPI00012197                                       |
| 5  | 0 | IPI00183487                                       |
| 0  | 0 | IPI00450235                                       |
| 3  | 0 | IPI00216318,IPI00759832                           |
| 4  | 0 | IPI00000816                                       |
| 3  | 0 | IPI00220642                                       |
| 1  | 0 | IPI00018146                                       |
| 4  | 0 | IPI00021263                                       |



| SwissProt      |
|----------------|
|                |
| Q59F68         |
|                |
| P07029,        |
| Q96IU4,        |
| P53396,        |
| P68032,P68133, |
| P63261,        |
| P12814,        |
| O43707,        |
| P61160,        |
| O14672,        |
| Q13444         |
| P78536,        |
| Q9H013,        |
| O75077,        |
| Q13443,        |
| Q9UHI8,        |
| O95994,        |
| O00468,        |
| P23526,        |
| Q09666         |
| O95433,        |
| P15121,        |
| O60218,        |
| Q04828,        |
| P52895,        |
| P42330,        |
| Q13740,        |
| P30838,        |
| P04075,        |
| P02760,        |
| Q9BY76,        |
| P39687,        |
| Q92688,        |
| Q9BTT0,        |
| Q9H6X2,        |
| P04083,        |
| P07355         |
| P08758,        |
| P27695,        |
| Q06481,        |
| Q8NCW5         |
| P05067,        |
| P61204,P84077, |
| P52565         |
| P36405,        |
| P55145,        |
| Q13510         |
| Q12797,        |
| P31939,        |
| Q15904,        |
| O75787,        |
| P21281,        |
| O75882,        |
| P30530,        |
| P61769,        |
| O94766         |
| O43505,        |

|         |
|---------|
| P15291, |
| O60512  |
| O60513, |
| Q95817, |
| P80723, |
| Q9P287, |
| P06276, |
| P23560, |
| P53004, |
| P13497, |
| P13497, |
| Q9H3K6, |
| P35613  |
| Q10588, |
| P43251, |
| P20290, |
| Q9BT56, |
| Q969H8, |
| Q07021, |
| P00736, |
| P09871, |
| Q6UWH4  |
| Q9HB71, |
| P62158, |
| P27797, |
| Q43852, |
| Q86VP6, |
| Q8WVQ1, |
| P27824, |
| P52907, |
| P47756, |
| P20810  |
| P16152, |
| P83916, |
| Q13185, |
| Q6QD51  |
| P78371, |
| P50991, |
| P48643, |
| Q99832, |
| P50990, |
| Q6YHK3, |
| P08571, |
| P16070, |
| P08174, |
| P32970, |
| P60033, |
| Q9Y6N8, |
| P55287, |
| P55290, |
| P00746  |
| P08603, |
| Q5TFM7  |
| P23528, |
| Q99674, |
| Q8WU30  |
| P10645  |
| Q8TDX6, |
| Q9BWS9  |
| O00533, |
| O00533, |
| Q8IZ52, |
| Q14011, |

|         |
|---------|
| P12277, |
| Q9Y240, |
| O00299, |
| Q14677, |
| O94985  |
| Q00610, |
| P10909, |
| P62633, |
| Q96KP4, |
| Q12860, |
| O43405, |
| P02462  |
| P08572, |
| Q14031, |
| P20908  |
| P05997  |
| P12109, |
| P27658, |
| P53618, |
| Q9ULV4, |
| P31327, |
| Q9H3G5, |
| O75629, |
| Q9NZV1, |
| Q9H336, |
| O75462, |
| O75718, |
| P55060, |
| P09603, |
| P21291, |
| P01034, |
| P04080, |
| Q01459, |
| P29279, |
| P10619  |
| P07858, |
| P53634, |
| P07339, |
| P07711, |
| Q9UBR2, |
| O60888, |
| P09341, |
| P42830, |
| P99999, |
| O00622, |
| Q8NCH0, |
| Q14118, |
| P07108  |
| P30046, |
| Q9NR30, |
| O00571, |
| Q08211  |
| Q68D85  |
| Q9UBS4, |
| O75190, |
| Q13217, |
| Q8NFT8, |
| O00429, |
| Q16555, |
| Q02487, |
| Q14126, |
| P60981, |
| P33316, |

|                |
|----------------|
| Q14204,        |
| P63167,        |
| Q16610,        |
| Q43854         |
| P68104,        |
| Q05639,        |
| P24534,        |
|                |
| P26641,        |
| P13639,        |
| Q12805,        |
| Q96C19,        |
| P52803,        |
| P41567,        |
| P05198,        |
| P41091,        |
| O75822,        |
| O75821,        |
| O00303,        |
| Q9Y262         |
| P23588,        |
| P06730         |
| Q04637,        |
| P63241,        |
| Q8N8S7,        |
| P06733,        |
| Q13822,        |
| O75354         |
| Q9Y2J2,        |
| P54764,        |
| P54756,        |
| P07814,        |
| P30040,        |
| Q9NQ30,        |
| Q01844,        |
| Q16394,        |
| Q9UBQ6,        |
| Q96TA1,        |
| O75063,        |
| Q92520,        |
| Q9Y285,        |
| P49327         |
| Q14517,        |
| P23142,        |
| P23142,        |
| P35555,        |
| P35556,        |
| P14324,        |
| Q9NZM1,        |
| P07954,        |
| Q96AY3,        |
| Q00688,        |
| Q02790,        |
| P61326,Q96A72, |
|                |
| P21333         |
| O75369,        |
| P02751         |
| Q68DP9         |
| P02751,        |
| Q16658,        |
| P19883,        |
| Q12841,        |

|         |
|---------|
| O95633, |
| Q6MZW2, |
| Q6MZW2, |
| Q96AE4, |
| P04066, |
| Q9BTY2, |
| P35637, |
| Q13283, |
| P11413  |
| P10253, |
| P22466, |
| P54803, |
| Q7LFX5, |
| P34059, |
| Q86SR1, |
| Q10471, |
| Q7Z7M9, |
| Q86SF2, |
| Q8N428, |
| Q14697, |
| P04406, |
| P41250, |
| Q14393, |
| P04062, |
| Q04446, |
| P01275, |
| P48507, |
| Q92616, |
| Q06430  |
| Q9Y2T3, |
| Q99988, |
| P50395  |
| Q92820, |
| P06280, |
| P16278, |
| O94923, |
| P35754, |
| Q8NBJ5  |
| P17900, |
| P49915, |
| P63244, |
| Q9UJJ9, |
| P15586, |
| Q8NBJ4, |
| P17174, |
| P00505, |
| P35052, |
| Q9Y625, |
| P06744, |
| Q14444  |
| Q86SQ4, |
| P22352, |
| Q9H772, |
| P28799, |
| P06396, |
| P00390, |
| P09211, |
| Q9NTK5, |
| P12081, |
| Q6FHU2  |
| P51858  |
| Q00341, |
| P06865, |

|                                            |
|--------------------------------------------|
| P07686,                                    |
| P49773,                                    |
| P0C0S8,P20671,Q16777,Q6F113,Q96KK5,Q99878, |
| P58876,Q5QNW6,Q93079,Q99877,               |
| P62805,                                    |
| P05534,                                    |
| P01891,                                    |
| Q07000,                                    |
| P04222,                                    |
| P09429                                     |
| O15347,                                    |
| Q9UK76,                                    |
| P09651,                                    |
| P22626,                                    |
| Q99729,                                    |
| P07910,                                    |
| O14979                                     |
| P52597,                                    |
| P31943                                     |
| P61978                                     |
| P14866,                                    |
| P52272,                                    |
| Q00839,                                    |
| P00492,                                    |
| Q96MM7,Q96MM7,Q96MM7,                      |
| P07900                                     |
| P08238                                     |
| P14625,                                    |
| P08107,                                    |
| P34932,                                    |
| P11021,                                    |
| P11142,                                    |
| P38646,                                    |
| P10809,                                    |
| P61604,                                    |
| P98160,                                    |
| Q92598,                                    |
| Q92743,                                    |
| Q12794,                                    |
| Q9Y4L1,                                    |
| P14735,                                    |
| O75874,                                    |
| P11717,                                    |
| P18065,                                    |
| P17936,                                    |
| P24592,                                    |
| Q16270,                                    |
| Q8WX77                                     |
| P05231,                                    |
| P40189,                                    |
| Q12905,                                    |
| Q12906                                     |
| P12268,                                    |
| P46940,                                    |
| P56537,                                    |
| O95965                                     |
| Q9Y287,                                    |
| Q07666,                                    |
| Q92945,                                    |
| Q6UWX4                                     |
| P52292,                                    |
| Q14974,                                    |
| P08779,                                    |

|         |
|---------|
| P08727, |
| Q16719, |
| P32004, |
| P25391, |
| O15230, |
| P07942, |
| P55268, |
| P11047, |
| P31025, |
| P00338, |
| P07195, |
| P01130, |
| Q32P28, |
| P09382, |
| P17931, |
| Q08380, |
| Q99538, |
| P38571, |
| Q9Y5X9, |
| P49257, |
| Q12907, |
| P02545, |
| P20700, |
| P43487, |
|         |
| Q01469, |
| Q9Y4K0, |
| Q86VZ4, |
| Q14114, |
| P09960  |
| Q14914, |
| Q9NS15  |
| O00508  |
| Q9Y383, |
| P51884, |
| Q8NCC3, |
| Q9UKM7, |
| Q16706, |
| P46821, |
| Q15691, |
| P31153, |
| O15232, |
| P43243, |
| P43121, |
| P40925, |
| P40926, |
| P21741, |
| P48163, |
| Q14696, |
| P08581, |
| P50579  |
| Q08431, |
| Q10469, |
| Q9UQ53  |
| Q09328, |
| P14174, |
| Q9UNW1, |
| P46013, |
| P03956, |
| P09238, |
| P19105, |
| P26038, |

|         |
|---------|
| Q13126, |
| P58546, |
| P35579, |
| P60660, |
| Q13765  |
| P54802, |
| P55209, |
| P49321, |
| P13592  |
| Q09161, |
| P19338  |
| Q15843, |
| Q9UMX5, |
| Q14112, |
| P22392  |
| Q15155, |
| Q15233, |
| Q9UM47, |
| P48745, |
| P00491, |
| P61916, |
| P55786, |
| P06748, |
| P15559  |
| Q92823, |
| Q14786, |
| Q9UNZ2, |
| Q9HB63, |
| Q02818, |
| P80303, |
| Q9Y266, |
| Q43809, |
| P61970, |
| Q86UD1  |
| Q99784, |
|         |
| Q68BL7  |
| Q13438, |
| Q13438, |
| P13674, |
| P07237, |
|         |
| Q9UQ80, |
| P11940  |
| P22234, |
| P19021, |
| Q13219, |
| Q99497, |
| P09874, |
| P43490, |
| Q15365, |
| Q15366  |
| P22061, |
| P12004, |
| Q9UKZ9, |
| Q9UHG2, |
| Q92824, |
| Q13442, |
| Q75340, |
| Q8WUM4, |
| Q9NRA1  |
| Q15198, |
| P30101, |



|         |
|---------|
| P13667, |
| Q15084, |
| Q96HC4, |
| P30086, |
| Q9UHV9, |
| Q9NQP4, |
| Q01813  |
| P07737, |
| P52209, |
| P00558, |
| Q96G03, |
| O00264, |
| O00625, |
| P14618, |
| Q13093, |
| P00750, |
| Q15149, |
| Q02809, |
| O00469, |
| O60568, |
| P13797, |
| P55058, |
| Q15181, |
| P62937, |
| P23284, |
| P30405, |
| Q96C90, |
| P30153, |
| P50897, |
| P42785  |
| Q06830, |
| P32119, |
| P30048, |
| Q13162, |
| P30041, |
| P14314, |
| O14744, |
| Q9UNN8, |
| P07225, |
| Q9UMS4, |
| O95084, |
| P07602, |
| Q9Y617, |
| P25786, |
| P25787, |
| P28066, |
| P60900, |
| O14818, |
| P20618, |
| P49721, |
| P49720, |
| P28070, |
| Q99436, |
| Q99460, |
| O00231, |
| Q06323, |
| Q9UL46, |
| P26599, |
| Q15185  |
| Q9P2B2, |
| P10586, |
| P26022, |
| P15151, |

|         |
|---------|
| Q4KMG2  |
| P11216, |
| P06737, |
| Q16769, |
| O00391, |
| Q6ZRP7, |
| P54727, |
| P62826, |
| Q16576  |
| P98179, |
| P38159, |
| Q5T081  |
| P61586, |
| P34096, |
| P03950, |
| O00584, |
| Q9H4A4, |
| P62906, |
| P30050, |
| P05388, |
| P05386, |
| P05387, |
| P25398, |
| P63220, |
| P23396, |
| P62701, |
| P62081, |
| P08865, |
| Q9P2E9, |
| P31949, |
| Q9HB40, |
| Q8IWY4, |
| O00560, |
| Q9BRK5, |
| Q8WVN6, |
| Q14563, |
| O95025, |
| O15041, |
| Q15019, |
| Q9UHD8, |
| Q8NC51, |
| P05120, |
| P36952, |
| P50453, |
| P07093, |
| Q01105, |
| Q15459, |
| Q12874, |
| O75533, |
| Q15427, |
| P31947, |
| P23246, |
| Q16629, |
| Q15465, |
| Q9HAT2, |
| Q9H173, |
| P42285, |
| P63208, |
| P11166, |
| P08195  |
| Q8WWI5, |
| P03973, |
| Q9H4F8, |

|                |
|----------------|
| Q7KZF4,        |
| P14678,P63162, |
| P62314,        |
| P62318,        |
| P00441,        |
| Q08629,        |
| P10451,        |
| Q13813,        |
| Q01082,        |
| Q13501,        |
| P10124,        |
| P78539,        |
| O60687         |
| Q9BYN0,        |
| P05455,        |
| Q08945,        |
| P50502,        |
| Q11201,        |
| Q92187,        |
| P52823,        |
| O76061,        |
| P48723,        |
| P31948,        |
| P16949         |
| Q8NBJ7,        |
| O60506,        |
| Q92804,        |
| P37802         |
| P37837,        |
| P26639,        |
| O75347,        |
| O14776,        |
| P17987,        |
| P10646,        |
| P48307,        |
| P02786,        |
| P01137,        |
| P61812,        |
| Q15582,        |
| P49746,        |
| Q86V81,        |
| P01033,        |
| P16035         |
| P29401,        |
| P42166,        |
| O00300,        |
| Q92973,        |
| O14657,        |
| Q9H497,        |
| P60174         |
| P06753         |
| P67936,        |
| P12270,        |
| P13693,        |
| Q12931,        |
| Q13263,        |
| Q8WUA8,        |
| P68363         |
| P07437,        |
| P68371,        |
| P10599,        |
| O95881,        |
| Q9BS26,        |

|                |
|----------------|
| O76003,        |
| Q16881         |
| P26368         |
| P62988,P62987, |
| P22314,        |
| P68036,        |
| P61088,        |
| P09936,        |
| Q9Y5K5,        |
| Q9NYU2,        |
| O60701,        |
| Q8NBZ7,        |
| P26640,        |
| Q6EMK4,        |
| P18206,        |
| P55072,        |
| P49767,        |
| O15240         |
| P15311,        |
| P08670,        |
| Q6UXI7,        |
| Q96QK1,        |
| Q6PCB0         |
| P23381         |
| O76076,        |
| O14980,        |
| P13010,        |
| P12956,        |
| Q9H773         |
| Q86Y38,        |
| P67809         |
| P31946,        |
| P62258,        |
| P61981,        |
| P27348,        |
| P63104,        |
