# Supplementary material
Source: PubMed Central journal article supplement (PMC2816016)
Supplement: M900134-MCP200_3.pdf [file M900134-MCP200_3.pdf]

## Supplementary Table 8: List of proteins identified by mass spectrometry in the

| Protein name                                                                                  |
|-----------------------------------------------------------------------------------------------|
| Gene_Symbol=- 12 kDa protein                                                                  |
| Gene_Symbol=- 19 kDa protein                                                                  |
| Gene_Symbol=- 21 kDa protein                                                                  |
| Gene_Symbol=- 23 kDa protein                                                                  |
| Gene_Symbol=- 30 kDa protein                                                                  |
| Gene_Symbol=- 52 kDa protein                                                                  |
| Gene_Symbol=- 71 kDa protein                                                                  |
| Gene_Symbol=- DAZAP1/MEF2D fusion protein                                                     |
| Gene_Symbol=- HDCMB21P                                                                        |
| Gene_Symbol=- P37 AUF1                                                                        |
| Gene_Symbol=- Protein                                                                         |
| Gene_Symbol=- Trypsinogen C                                                                   |
| Gene_Symbol=AARS 107 kDa protein                                                              |
| Gene_Symbol=ABCF1 Isoform 2 of ATP-binding cassette sub-family F member 1                     |
| Gene_Symbol=ABHD14B Isoform 1 of Abhydrolase domain-containing protein 14B                    |
| Gene_Symbol=ABP1 Isoform 1 of Amiloride-sensitive amine oxidase [copper-containing] precursor |
| Gene_Symbol=ACAT1 ACAT1 protein                                                               |
| Gene_Symbol=ACBD3 Golgi resident protein GCP60                                                |
| Gene_Symbol=ACE Angiotensin-converting enzyme, somatic isoform precursor                      |
| Gene_Symbol=ACIN1 Isoform 1 of Apoptotic chromatin condensation inducer in the nucleus        |
| Gene_Symbol=ACLY ATP-citrate synthase                                                         |
| Gene_Symbol=ACOT7 Isoform 2 of Cytosolic acyl coenzyme A thioester hydrolase                  |
| Gene_Symbol=ACP5 Tartrate-resistant acid phosphatase type 5 precursor                         |
| Gene_Symbol=ACTA1 Actin, alpha skeletal muscle                                                |
| Gene_Symbol=ACTB Actin, cytoplasmic 1                                                         |
| Gene_Symbol=ACTN1 Actinin alpha 1 isoform b                                                   |
| Gene_Symbol=ACTN4 Alpha-actinin-4                                                             |
| Gene_Symbol=ACTR3 Actin-like protein 3                                                        |
| Gene_Symbol=ADAM10 ADAM 10 precursor                                                          |
| Gene_Symbol=ADAM15 a disintegrin and metalloproteinase domain 15 isoform 3 preproprotein      |
| Gene_Symbol=ADAM17 Isoform B of ADAM 17 precursor                                             |
| Gene_Symbol=ADAM9 Isoform 1 of ADAM 9 precursor                                               |
| Gene_Symbol=ADAMTSL2 ADAMTS-like 2                                                            |
| Gene_Symbol=ADAR Isoform 2 of Double-stranded RNA-specific adenosine deaminase                |
| Gene_Symbol=ADAR Isoform 4 of Double-stranded RNA-specific adenosine deaminase                |
| Gene_Symbol=ADCYAP1 Pituitary adenylate cyclase-activating polypeptide precursor              |
| Gene_Symbol=AGT Angiotensinogen precursor                                                     |
| Gene_Symbol=AHCY Adenosylhomocysteinase                                                       |
| Gene_Symbol=AHSA1 Activator of 90 kDa heat shock protein ATPase homolog 1                     |
| Gene_Symbol=AIFM1 Isoform 1 of Apoptosis-inducing factor 1, mitochondrial precursor           |
| Gene_Symbol=AK2 Isoform 1 of Adenylate kinase isoenzyme 2, mitochondrial                      |
| Gene_Symbol=AKR1A1 Alcohol dehydrogenase                                                      |
| Gene_Symbol=AKR1B1 Aldose reductase                                                           |
| Gene_Symbol=AKR1B10 Aldo-keto reductase family 1 member B10                                   |
| Gene_Symbol=AKR1C1 Aldo-keto reductase family 1 member C1                                     |
| Gene_Symbol=AKR1C3 Aldo-keto reductase family 1 member C3                                     |
| Gene_Symbol=AKR7A2 Aflatoxin B1 aldehyde reductase member 2                                   |
| Gene_Symbol=AKR7A3 Aflatoxin B1 aldehyde reductase member 3                                   |
| Gene_Symbol=ALCAM Isoform 1 of CD166 antigen precursor                                        |
| Gene_Symbol=ALDH1A1 Retinal dehydrogenase 1                                                   |
| Gene_Symbol=ALDH3A2 Isoform 1 of Fatty aldehyde dehydrogenase                                 |
| Gene_Symbol=ALDH9A1 aldehyde dehydrogenase 9A1                                                |
| Gene_Symbol=ALDOA Fructose-bisphosphate aldolase A                                            |
| Gene_Symbol=ALDOC Fructose-bisphosphate aldolase C                                            |
| Gene_Symbol=AMBP AMBP protein precursor                                                       |
| Gene_Symbol=ANP32A Acidic leucine-rich nuclear phosphoprotein 32 family member A              |
| Gene_Symbol=ANP32B Isoform 1 of Acidic leucine-rich nuclear phosphoprotein 32 family member B |
| Gene_Symbol=ANP32E Acidic leucine-rich nuclear phosphoprotein 32 family member E              |
| Gene_Symbol=ANXA5 Annexin A5                                                                  |
| Gene_Symbol=AP3D1 Isoform 1 of AP-3 complex subunit delta-1                                   |

|                                                                                                       |
|-------------------------------------------------------------------------------------------------------|
| Gene_Symbol=APEH Acylamino-acid-releasing enzyme                                                      |
| Gene_Symbol=APEX1 DNA-(apurinic or apyrimidinic site) lyase                                           |
| Gene_Symbol=API5 Isoform 4 of Apoptosis inhibitor 5                                                   |
| Gene_Symbol=APLP2 Isoform 1 of Amyloid-like protein 2 precursor                                       |
| Gene_Symbol=APOA1BP apolipoprotein A-I binding protein precursor                                      |
| Gene_Symbol=APP Isoform APP770 of Amyloid beta A4 protein precursor (Fragment)                        |
| Gene_Symbol=ARCN1 Coatomer subunit delta                                                              |
| Gene_Symbol=ARF1 ADP-ribosylation factor 1                                                            |
| Gene_Symbol=ARFIP1 Isoform A of Arfaptin-1                                                            |
| Gene_Symbol=ARHGDI A 26 kDa protein                                                                   |
| Gene_Symbol=ARMET ARMET protein precursor                                                             |
| Gene_Symbol=ARSA Hypothetical protein DKFZp686G12235                                                  |
| Gene_Symbol=ARTS-1 type 1 tumor necrosis factor receptor shedding aminopeptidase regulator isoform a  |
| Gene_Symbol=ASCC3L1 U5 small nuclear ribonucleoprotein 200 kDa helicase                               |
| Gene_Symbol=ASPH 26 kDa protein                                                                       |
| Gene_Symbol=ASRGL1 asparaginase-like 1 protein                                                        |
| Gene_Symbol=ASS1 Argininosuccinate synthetase                                                         |
| Gene_Symbol=ATIC Bifunctional purine biosynthesis protein PURH                                        |
| Gene_Symbol=ATP2A2 115 kDa protein                                                                    |
| Gene_Symbol=ATP5A1 ATP synthase subunit alpha, mitochondrial precursor                                |
| Gene_Symbol=ATP5B ATP synthase subunit beta, mitochondrial precursor                                  |
| Gene_Symbol=ATP5J ATP synthase coupling factor 6, mitochondrial precursor                             |
| Gene_Symbol=ATP6AP1 53 kDa protein                                                                    |
| Gene_Symbol=ATP6AP2 Protein                                                                           |
| Gene_Symbol=ATP6V1A Vacuolar ATP synthase catalytic subunit A, ubiquitous isoform                     |
| Gene_Symbol=ATP6V1G2;BAT1 BAT1 protein                                                                |
| Gene_Symbol=ATR N Isoform 1 of Attractin precursor                                                    |
| Gene_Symbol=AZGP1 alpha-2-glycoprotein 1, zinc                                                        |
| Gene_Symbol=B2M Beta-2-microglobulin precursor                                                        |
| Gene_Symbol=B3GALT6 Beta-1,3-galactosyltransferase 6                                                  |
| Gene_Symbol=B3GAT3 Galactosylgalactosylxylosylprotein 3-beta-glucuronosyltransferase 3                |
| Gene_Symbol=B3GNT1 N-acetylgalactosaminide beta-1,3-N-acetylglucosaminyltransferase                   |
| Gene_Symbol=B4GALT3 44 kDa protein                                                                    |
| Gene_Symbol=BAG2 BAG family molecular chaperone regulator 2                                           |
| Gene_Symbol=BANF1 Barrier-to-autointegration factor                                                   |
| Gene_Symbol=BAT2 Isoform 1 of Large proline-rich protein BAT2                                         |
| Gene_Symbol=BCLAF1 Isoform 1 of Bcl-2-associated transcription factor 1                               |
| Gene_Symbol=BOLA2B;BOLA2 BclA-like protein 2 isoform a                                                |
| Gene_Symbol=BPNT1 Isoform 1 of 3'(2'),5'-bisphosphate nucleotidase 1                                  |
| Gene_Symbol=BUB3 Mitotic checkpoint protein BUB3                                                      |
| Gene_Symbol=C11orf58 Small acidic protein                                                             |
| Gene_Symbol=C13orf8 Zinc finger protein KIAA1802                                                      |
| Gene_Symbol=C14orf141;LTBP2 Latent-transforming growth factor beta-binding protein 2 precursor        |
| Gene_Symbol=C14orf156 SRA stem-loop-interacting RNA-binding protein, mitochondrial precursor          |
| Gene_Symbol=C14orf166 Protein C14orf166                                                               |
| Gene_Symbol=C19orf10 Uncharacterized protein C19orf10 precursor                                       |
| Gene_Symbol=C1QBP Complement component 1 Q subcomponent-binding protein, mitochondrial precursor      |
| Gene_Symbol=C1QTNF3;AMACR Alpha-methyl-acyl-CoA racemase                                              |
| Gene_Symbol=C21orf33 Isoform Long of ES1 protein homolog, mitochondrial precursor                     |
| Gene_Symbol=C22orf28 UPF0027 protein C22orf28                                                         |
| Gene_Symbol=C4orf31 hypothetical protein LOC79625                                                     |
| Gene_Symbol=C5 Complement component 5 variant (Fragment)                                              |
| Gene_Symbol=C6orf108 c-Myc-responsive protein Rcl                                                     |
| Gene_Symbol=CACYBP Isoform 1 of Calyculin-binding protein                                             |
| Gene_Symbol=CALCA Isoform 1 of Calcitonin precursor                                                   |
| Gene_Symbol=CALM3;CALM2;CALM1 Calmodulin                                                              |
| Gene_Symbol=CALR Calreticulin precursor                                                               |
| Gene_Symbol=CALU Isoform 1 of Calumenin precursor                                                     |
| Gene_Symbol=CAMK2D Isoform Delta 6 of Calcium/calmodulin-dependent protein kinase type II delta chain |
| Gene_Symbol=CAND1 Isoform 1 of Cullin-associated NEDD8-dissociated protein 1                          |
| Gene_Symbol=CANT1 Isoform 1 of Soluble calcium-activated nucleotidase 1                               |
| Gene_Symbol=CANX Calnexin precursor                                                                   |
| Gene_Symbol=CAP1 Adenylyl cyclase-associated protein 1                                                |

|                                                                                         |
|-----------------------------------------------------------------------------------------|
| Gene_Symbol=CAPZA1 F-actin capping protein subunit alpha-1                              |
| Gene_Symbol=CAPZA2 F-actin capping protein subunit alpha-2                              |
| Gene_Symbol=CAPZB Isoform 1 of F-actin capping protein subunit beta                     |
| Gene_Symbol=CARHSP1 Calcium-regulated heat stable protein 1                             |
| Gene_Symbol=CARS cysteinyl-tRNA synthetase isoform c                                    |
| Gene_Symbol=CBR1 Carbonyl reductase [NADPH] 1                                           |
| Gene_Symbol=CBX1 Chromobox protein homolog 1                                            |
| Gene_Symbol=CBX3;LOC653972 Chromobox protein homolog 3                                  |
| Gene_Symbol=CBX5 Chromobox protein homolog 5                                            |
| Gene_Symbol=CCAR1 Cell division cycle and apoptosis regulator protein 1                 |
| Gene_Symbol=CCDC25 CCDC25 protein                                                       |
| Gene_Symbol=CCT2 T-complex protein 1 subunit beta                                       |
| Gene_Symbol=CCT3 chaperonin containing TCP1, subunit 3 isoform b                        |
| Gene_Symbol=CCT4 T-complex protein 1 subunit delta                                      |
| Gene_Symbol=CCT5 T-complex protein 1 subunit epsilon                                    |
| Gene_Symbol=CCT6A T-complex protein 1 subunit zeta                                      |
| Gene_Symbol=CCT7 T-complex protein 1 subunit eta                                        |
| Gene_Symbol=CCT8 Chaperonin containing TCP1, subunit 8 (Theta) variant                  |
| Gene_Symbol=CD9 CD9 antigen                                                             |
| Gene_Symbol=CDC42 Isoform 1 of Cell division control protein 42 homolog precursor       |
| Gene_Symbol=CDC5L Cell division cycle 5-like protein                                    |
| Gene_Symbol=CDH1 Epithelial-cadherin precursor                                          |
| Gene_Symbol=CDH17 Cadherin-17 precursor                                                 |
| Gene_Symbol=CDH2 Cadherin-2 precursor                                                   |
| Gene_Symbol=CEACAM5 Carcinoembryonic antigen-related cell adhesion molecule 5 precursor |
| Gene_Symbol=CEL Carboxyl ester lipase                                                   |
| Gene_Symbol=CFL1 Cofilin-1                                                              |
| Gene_Symbol=CHERP calcium homeostasis endoplasmic reticulum protein                     |
| Gene_Symbol=CHGA chromogranin A precursor                                               |
| Gene_Symbol=CHGB Secretogranin-1 precursor                                              |
| Gene_Symbol=CHID1 Isoform 2 of Chitinase domain-containing protein 1 precursor          |
| Gene_Symbol=CHST11 Isoform 1 of Carbohydrate sulfotransferase 11                        |
| Gene_Symbol=CIRBP 32 kDa protein                                                        |
| Gene_Symbol=CKB Creatine kinase B-type                                                  |
| Gene_Symbol=CKMT1B;CKMT1A Creatine kinase, ubiquitous mitochondrial precursor           |
| Gene_Symbol=CLIC1 Chloride intracellular channel protein 1                              |
| Gene_Symbol=CLINT1 Isoform 1 of Clathrin interactor 1                                   |
| Gene_Symbol=CLSTN1 calyntenin 1 isoform 2                                               |
| Gene_Symbol=CLSTN2 Calsyntenin-2 precursor                                              |
| Gene_Symbol=CLSTN3 Alcadein beta                                                        |
| Gene_Symbol=CLTC Isoform 2 of Clathrin heavy chain 1                                    |
| Gene_Symbol=CLU Clusterin precursor                                                     |
| Gene_Symbol=CMPK cytidylate kinase                                                      |
| Gene_Symbol=CNBP Zinc finger protein 9                                                  |
| Gene_Symbol=CNDP2 PP856                                                                 |
| Gene_Symbol=COCH Cochlin precursor                                                      |
| Gene_Symbol=COPA Coatamer subunit alpha                                                 |
| Gene_Symbol=COPB1 Coatamer subunit beta                                                 |
| Gene_Symbol=COPB2 Coatamer subunit beta'                                                |
| Gene_Symbol=COPE epsilon subunit of coatamer protein complex isoform b                  |
| Gene_Symbol=COPG 98 kDa protein                                                         |
| Gene_Symbol=CORO1B;PTPRCAP Coronin-1B                                                   |
| Gene_Symbol=CORO1C Coronin-1C                                                           |
| Gene_Symbol=COTL1 Coactosin-like protein                                                |
| Gene_Symbol=COX5A Cytochrome c oxidase subunit 5A, mitochondrial precursor              |
| Gene_Symbol=CPD Carboxypeptidase D precursor                                            |
| Gene_Symbol=CPE Carboxypeptidase E precursor                                            |
| Gene_Symbol=CPNE1;RBM12 RNA-binding protein 12                                          |
| Gene_Symbol=CPSF1 Cleavage and polyadenylation specificity factor subunit 1             |
| Gene_Symbol=CPSF2 Cleavage and polyadenylation specificity factor subunit 2             |
| Gene_Symbol=CREG1 Protein CREG1 precursor                                               |
| Gene_Symbol=CRIP2 Cysteine-rich protein 2                                               |
| Gene_Symbol=CRK v-crk sarcoma virus CT10 oncogene homolog isoform b                     |

|                                                                                             |
|---------------------------------------------------------------------------------------------|
| Gene_Symbol=CRKL Crk-like protein                                                           |
| Gene_Symbol=CRYZ Quinone oxidoreductase                                                     |
| Gene_Symbol=CS Citrate synthase, mitochondrial precursor                                    |
| Gene_Symbol=CSNK2A1 Casein kinase 2 alpha isoform                                           |
| Gene_Symbol=CSRP1 Cysteine and glycine-rich protein 1                                       |
| Gene_Symbol=CSTB Cystatin-B                                                                 |
| Gene_Symbol=CSTF1 Cleavage stimulation factor 50 kDa subunit                                |
| Gene_Symbol=CSTF2 Isoform 1 of Cleavage stimulation factor 64 kDa subunit                   |
| Gene_Symbol=CTAGE5 Isoform MEA6 of Cutaneous T-cell lymphoma-associated antigen 5           |
| Gene_Symbol=CTHRC1 Isoform 1 of Collagen triple helix repeat-containing protein 1 precursor |
| Gene_Symbol=CTNNA1 Isoform 1 of Catenin alpha-1                                             |
| Gene_Symbol=CTNNB1 Isoform 1 of Catenin beta-1                                              |
| Gene_Symbol=CTNND1 Isoform 1AB of Catenin delta-1                                           |
| Gene_Symbol=CTSA cathepsin A precursor                                                      |
| Gene_Symbol=CTSC Dipeptidyl-peptidase 1 precursor                                           |
| Gene_Symbol=CTSD Cathepsin D precursor                                                      |
| Gene_Symbol=CTTN Src substrate cortactin                                                    |
| Gene_Symbol=CUTA Isoform B of Protein CutA precursor                                        |
| Gene_Symbol=CYB5B cytochrome b5 outer mitochondrial membrane precursor                      |
| Gene_Symbol=CYCS Cytochrome c                                                               |
| Gene_Symbol=CYFIP1 Isoform 1 of Cytoplasmic FMR1-interacting protein 1                      |
| Gene_Symbol=DAG1 Dystroglycan precursor                                                     |
| Gene_Symbol=DAZAP1 Isoform 1 of DAZ-associated protein 1                                    |
| Gene_Symbol=DBI Isoform a 1 of Acyl-CoA-binding protein                                     |
| Gene_Symbol=DBN1 Drebrin                                                                    |
| Gene_Symbol=DCI Isoform 1 of 3,2-trans-enoyl-CoA isomerase, mitochondrial precursor         |
| Gene_Symbol=DDAH1 NG,NG-dimethylarginine dimethylaminohydrolase 1                           |
| Gene_Symbol=DDB1 DNA damage-binding protein 1                                               |
| Gene_Symbol=DDC Aromatic-L-amino-acid decarboxylase                                         |
| Gene_Symbol=DDR1 Isoform 1 of Epithelial discoidin domain-containing receptor 1 precursor   |
| Gene_Symbol=DDT D-dopachrome decarboxylase                                                  |
| Gene_Symbol=DDX1 ATP-dependent RNA helicase DDX1                                            |
| Gene_Symbol=DDX17 Isoform 1 of Probable ATP-dependent RNA helicase DDX17                    |
| Gene_Symbol=DDX17 Isoform 3 of Probable ATP-dependent RNA helicase DDX17                    |
| Gene_Symbol=DDX21 Isoform 1 of Nucleolar RNA helicase 2                                     |
| Gene_Symbol=DDX42 Isoform 2 of ATP-dependent RNA helicase DDX42                             |
| Gene_Symbol=DDX46 Probable ATP-dependent RNA helicase DDX46                                 |
| Gene_Symbol=DDX5 Probable ATP-dependent RNA helicase DDX5                                   |
| Gene_Symbol=DECR1 2,4-dienoyl-CoA reductase, mitochondrial precursor                        |
| Gene_Symbol=DEK Protein DEK                                                                 |
| Gene_Symbol=DHX15 DEAH (Asp-Glu-Ala-His) box polypeptide 15                                 |
| Gene_Symbol=DHX9 ATP-dependent RNA helicase A                                               |
| Gene_Symbol=DIDO1 Isoform 4 of Death-inducer obliterator 1                                  |
| Gene_Symbol=DKC1 H/ACA ribonucleoprotein complex subunit 4                                  |
| Gene_Symbol=DKFZp686O24166 Hypothetical protein DKFZp686I21167                              |
| Gene_Symbol=DLD Dihydrolipoyl dehydrogenase, mitochondrial precursor                        |
| Gene_Symbol=DLG1 Isoform 1 of Disks large homolog 1                                         |
| Gene_Symbol=DNAJB1 DnaJ homolog subfamily B member 1                                        |
| Gene_Symbol=DNAJB11 DnaJ homolog subfamily B member 11 precursor                            |
| Gene_Symbol=DNAJC10 DnaJ homolog subfamily C member 10                                      |
| Gene_Symbol=DNAJC3 Isoform 1 of DnaJ homolog subfamily C member 3                           |
| Gene_Symbol=DNAJC8 DnaJ homolog subfamily C member 8                                        |
| Gene_Symbol=DNASE2 Deoxyribonuclease-2-alpha precursor                                      |
| Gene_Symbol=DNM1L Isoform 5 of Dynamin-1-like protein                                       |
| Gene_Symbol=DNM2 Isoform 1 of Dynamin-2                                                     |
| Gene_Symbol=DSC2 Isoform 2A of Desmocollin-2 precursor                                      |
| Gene_Symbol=DSG2 desmoglein 2 preproprotein                                                 |
| Gene_Symbol=DSP Isoform DPI of Desmoplakin                                                  |
| Gene_Symbol=DSTN Destrin                                                                    |
| Gene_Symbol=DYNC1H1 532 kDa protein                                                         |
| Gene_Symbol=DYNC1I2 Isoform 2E of Cytoplasmic dynein 1 intermediate chain 2                 |
| Gene_Symbol=DYNLL1 Dynein light chain 1, cytoplasmic                                        |
| Gene_Symbol=ECHS1 Enoyl-CoA hydratase, mitochondrial precursor                              |

|                                                                                                    |
|----------------------------------------------------------------------------------------------------|
| Gene_Symbol=ECM1 Extracellular matrix protein 1 precursor                                          |
| Gene_Symbol=EEF1A1 Elongation factor 1-alpha 1                                                     |
| Gene_Symbol=EEF1B2 Elongation factor 1-beta                                                        |
| Gene_Symbol=EEF1D EEF1D protein                                                                    |
| Gene_Symbol=EEF1D eukaryotic translation elongation factor 1 delta isoform 1                       |
| Gene_Symbol=EEF1E1 Eukaryotic translation elongation factor 1 epsilon-1                            |
| Gene_Symbol=EEF1G Elongation factor 1-gamma                                                        |
| Gene_Symbol=EEF2 Elongation factor 2                                                               |
| Gene_Symbol=EFTUD2 116 kDa U5 small nuclear ribonucleoprotein component                            |
| Gene_Symbol=EIF2S2 Eukaryotic translation initiation factor 2 subunit 2                            |
| Gene_Symbol=EIF3S12 Eukaryotic translation initiation factor 3 subunit 12                          |
| Gene_Symbol=EIF3S2 Eukaryotic translation initiation factor 3 subunit 2                            |
| Gene_Symbol=EIF3S3 Eukaryotic translation initiation factor 3 subunit 3                            |
| Gene_Symbol=EIF3S4 Eukaryotic translation initiation factor 3 subunit 4                            |
| Gene_Symbol=EIF3S6 Eukaryotic translation initiation factor 3 subunit 6                            |
| Gene_Symbol=EIF3S6IP DJ1014D13.1 protein                                                           |
| Gene_Symbol=EIF3S8 Eukaryotic translation initiation factor 3 subunit 8                            |
| Gene_Symbol=EIF3S9 99 kDa protein                                                                  |
| Gene_Symbol=EIF4A1 Eukaryotic initiation factor 4A-I                                               |
| Gene_Symbol=EIF4A2 Isoform 1 of Eukaryotic initiation factor 4A-II                                 |
| Gene_Symbol=EIF4E Eukaryotic translation initiation factor 4E                                      |
| Gene_Symbol=EIF4G1 EIF4G1 variant protein (Fragment)                                               |
| Gene_Symbol=EIF4G2 Eukaryotic translation initiation factor 4 gamma 2                              |
| Gene_Symbol=EIF5A Isoform 2 of Eukaryotic translation initiation factor 5A-1                       |
| Gene_Symbol=EIF5B Eukaryotic translation initiation factor 5B                                      |
| Gene_Symbol=ELAVL1 ELAV-like protein 1                                                             |
| Gene_Symbol=EML4 Echinoderm microtubule-associated protein-like 4                                  |
| Gene_Symbol=ENAH Isoform 2 of Protein enabled homolog                                              |
| Gene_Symbol=ENO1 Isoform alpha-enolase of Alpha-enolase                                            |
| Gene_Symbol=ENO2 Gamma-enolase                                                                     |
| Gene_Symbol=ENOPH1 Isoform 1 of Enolase-phosphatase E1                                             |
| Gene_Symbol=ENSA Hypothetical protein DKFZp779B2258                                                |
| Gene_Symbol=ENTPD6 Ectonucleoside triphosphate diphosphohydrolase 6                                |
| Gene_Symbol=EPHX1 Epoxide hydrolase 1                                                              |
| Gene_Symbol=EPRS glutamyl-prolyl tRNA synthetase                                                   |
| Gene_Symbol=ERH Enhancer of rudimentary homolog                                                    |
| Gene_Symbol=ERO1L ERO1-like protein alpha precursor                                                |
| Gene_Symbol=ERP29 Endoplasmic reticulum protein ERp29 precursor                                    |
| Gene_Symbol=ESD S-formylglutathione hydrolase                                                      |
| Gene_Symbol=EWSR1 CDNA FLJ31747 fis, clone NT2RI2007377, highly similar to RNA-BINDING PROTEIN EWS |
| Gene_Symbol=F10 Coagulation factor X precursor                                                     |
| Gene_Symbol=F11R Isoform 1 of Putative thiosulfate sulfurtransferase KAT                           |
| Gene_Symbol=F11R Junctional adhesion molecule A precursor                                          |
| Gene_Symbol=F5 Coagulation factor V                                                                |
| Gene_Symbol=FAM3B 28 kDa protein                                                                   |
| Gene_Symbol=FAM3C Protein FAM3C precursor                                                          |
| Gene_Symbol=FAM49B Protein FAM49B                                                                  |
| Gene_Symbol=FARSA Phenylalanyl-tRNA synthetase alpha chain                                         |
| Gene_Symbol=FARSB Phenylalanyl-tRNA synthetase beta chain                                          |
| Gene_Symbol=FASN fatty acid synthase                                                               |
| Gene_Symbol=FBL rRNA 2'-O-methyltransferase fibrillarin                                            |
| Gene_Symbol=FDPS Farnesyl diphosphate synthase                                                     |
| Gene_Symbol=FEN1 Flap endonuclease 1                                                               |
| Gene_Symbol=FH Isoform Mitochondrial of Fumarate hydratase, mitochondrial precursor                |
| Gene_Symbol=FHL2 FHL2 isoform 5                                                                    |
| Gene_Symbol=FIP1L1 Isoform 3 of Pre-mRNA 3'-end-processing factor FIP1                             |
| Gene_Symbol=FKBP1A FKBP1A protein                                                                  |
| Gene_Symbol=FKBP3 FK506-binding protein 3                                                          |
| Gene_Symbol=FKBP4 FK506-binding protein 4                                                          |
| Gene_Symbol=FLJ10292 Protein mago nashi homolog 2                                                  |
| Gene_Symbol=FLJ37440 Hypothetical protein FLJ37440                                                 |
| Gene_Symbol=FLNA filamin A, alpha                                                                  |
| Gene_Symbol=FLNB 278 kDa protein                                                                   |

|                                                                                                                                  |
|----------------------------------------------------------------------------------------------------------------------------------|
| Gene_Symbol=FLNC Gamma filamin variant                                                                                           |
| Gene_Symbol=FMR1 Isoform 1 of Fragile X mental retardation 1 protein                                                             |
| Gene_Symbol=FN1 Hypothetical protein DKFZp686K08164                                                                              |
| Gene_Symbol=FNBP1L Isoform 3 of Formin-binding protein 1-like                                                                    |
| Gene_Symbol=FRAS1 Isoform 2 of Extracellular matrix protein FRAS1 precursor                                                      |
| Gene_Symbol=FST Isoform 1 of Follistatin precursor                                                                               |
| Gene_Symbol=FSTL4 Isoform 1 of Follistatin-related protein 4 precursor                                                           |
| Gene_Symbol=FUBP1 Isoform 2 of Far upstream element-binding protein 1                                                            |
| Gene_Symbol=FURIN Furin precursor                                                                                                |
| Gene_Symbol=FUS Fus-like protein (Fragment)                                                                                      |
| Gene_Symbol=FUSIP1 Isoform 2 of FUS-interacting serine-arginine-rich protein 1                                                   |
| Gene_Symbol=FXR1 Isoform 1 of Fragile X mental retardation syndrome-related protein 1                                            |
| Gene_Symbol=G3BP1 Ras GTPase-activating protein-binding protein 1                                                                |
| Gene_Symbol=G6PD Isoform Long of Glucose-6-phosphate 1-dehydrogenase                                                             |
| Gene_Symbol=GAA Lysosomal alpha-glucosidase precursor                                                                            |
| Gene_Symbol=GALC galactosylceramidase isoform a precursor                                                                        |
| Gene_Symbol=GALNS N-acetylgalactosamine-6-sulfatase precursor                                                                    |
| Gene_Symbol=GALNT2 Polypeptide N-acetylgalactosaminyltransferase 2                                                               |
| Gene_Symbol=GALNT7 N-acetylgalactosaminyltransferase 7                                                                           |
| Gene_Symbol=GANAB 107 kDa protein                                                                                                |
| Gene_Symbol=GAPDH Glyceraldehyde-3-phosphate dehydrogenase                                                                       |
| Gene_Symbol=GARS GARS protein                                                                                                    |
| Gene_Symbol=GBA Isoform Long of Glucosylceramidase precursor                                                                     |
| Gene_Symbol=GCG Glucagon precursor                                                                                               |
| Gene_Symbol=GCLC Glutamate--cysteine ligase catalytic subunit                                                                    |
| Gene_Symbol=GCLM Glutamate--cysteine ligase regulatory subunit                                                                   |
| Gene_Symbol=GDF15 Growth/differentiation factor 15 precursor                                                                     |
| Gene_Symbol=GDI2 Rab GDP dissociation inhibitor beta                                                                             |
| Gene_Symbol=GFPT1 Isoform 1 of Glucosamine--fructose-6-phosphate aminotransferase [isomerizing] 1                                |
| Gene_Symbol=GGH Gamma-glutamyl hydrolase precursor                                                                               |
| Gene_Symbol=GLB1 Beta-galactosidase precursor                                                                                    |
| Gene_Symbol=GLO1 Lactoylglutathione lyase                                                                                        |
| Gene_Symbol=GLOD4 Uncharacterized protein C17orf25                                                                               |
| Gene_Symbol=GM2A Ganglioside GM2 activator precursor                                                                             |
| Gene_Symbol=GMFB Glia maturation factor beta                                                                                     |
| Gene_Symbol=GMPS GMP synthase                                                                                                    |
| Gene_Symbol=GNB2L1 Lung cancer oncogene 7                                                                                        |
| Gene_Symbol=GNPDA1 Glucosamine-6-phosphate isomerase                                                                             |
| Gene_Symbol=GNS N-acetylglucosamine-6-sulfatase precursor                                                                        |
| Gene_Symbol=GOLPH2 Golgi phosphoprotein 2                                                                                        |
| Gene_Symbol=GORASP2 Isoform 1 of Golgi reassembly-stacking protein 2                                                             |
| Gene_Symbol=GOT1 Aspartate aminotransferase, cytoplasmic                                                                         |
| Gene_Symbol=GOT2 Aspartate aminotransferase, mitochondrial precursor                                                             |
| Gene_Symbol=GPC1 Glypican-1 precursor                                                                                            |
| Gene_Symbol=GPI Glucose-6-phosphate isomerase                                                                                    |
| Gene_Symbol=GPIAP1 GPI-anchored membrane protein 1                                                                               |
| Gene_Symbol=GRHPR Glyoxylate reductase/hydroxypyruvate reductase                                                                 |
| Gene_Symbol=GRP Isoform 1 of Gastrin-releasing peptide precursor                                                                 |
| Gene_Symbol=GRP Isoform 2 of Gastrin-releasing peptide precursor                                                                 |
| Gene_Symbol=GSN Isoform 1 of Gelsolin precursor                                                                                  |
| Gene_Symbol=GSR Isoform Mitochondrial of Glutathione reductase, mitochondrial precursor                                          |
| Gene_Symbol=GSTA1 Glutathione S-transferase A1                                                                                   |
| Gene_Symbol=GSTP1 Glutathione S-transferase P                                                                                    |
| Gene_Symbol=GTPBP9 Isoform 1 of Putative GTP-binding protein 9                                                                   |
| Gene_Symbol=H1FX Histone H1x                                                                                                     |
| Gene_Symbol=H2AFV Histone H2AV                                                                                                   |
| Gene_Symbol=H2AFY2 Core histone macro-H2A.2                                                                                      |
| Gene_Symbol=H3F3A;H3F3B Histone H3.3                                                                                             |
| Gene_Symbol=HAGH Hydroxyacylglutathione hydrolase                                                                                |
| Gene_Symbol=HARS Histidyl-tRNA synthetase, cytoplasmic                                                                           |
| Gene_Symbol=hCG_2015269 similar to Phosphoglycerate mutase 1 (Phosphoglycerate mutase isozyme B) (PGAM-B) (BPG-dependent PGAM 1) |
| Gene_Symbol=HDGF Hepatoma-derived growth factor                                                                                  |
| Gene_Symbol=HDGFRP3 Hepatoma-derived growth factor-related protein 3                                                             |

|                                                                                                                                                                   |
|-------------------------------------------------------------------------------------------------------------------------------------------------------------------|
| Gene_Symbol=HEXA Beta-hexosaminidase alpha chain precursor                                                                                                        |
| Gene_Symbol=HEXB Beta-hexosaminidase beta chain precursor                                                                                                         |
| Gene_Symbol=HGD Homogentisate 1,2-dioxygenase                                                                                                                     |
| Gene_Symbol=HINT1 Histidine triad nucleotide-binding protein 1                                                                                                    |
| Gene_Symbol=HINT2 Histidine triad nucleotide-binding protein 2                                                                                                    |
| Gene_Symbol=HIP1R Huntingtin-interacting protein 1-related protein                                                                                                |
| Gene_Symbol=HIP2 Isoform 1 of Ubiquitin-conjugating enzyme E2-25 kDa                                                                                              |
| Gene_Symbol=HIST1H1B Histone H1.5                                                                                                                                 |
| Gene_Symbol=HIST1H1C Histone H1.2                                                                                                                                 |
| Gene_Symbol=HIST1H2AA Histone H2A type 1-A                                                                                                                        |
| Gene_Symbol=HIST1H2AE;HIST1H2AB Histone H2A type 1-B                                                                                                              |
| Gene_Symbol=HIST1H2BE;HIST1H2BG;HIST1H2BI;HIST1H2BF;HIST1H2BC H2B histone family, member A                                                                        |
| Gene_Symbol=HIST1H2BO Histone H2B type 1-O                                                                                                                        |
| Gene_Symbol=HIST1H4C;HIST2H4B;HIST2H4A;HIST1H4H;HIST1H4F;HIST1H4L;HIST1H4J;HIST1H4B;HIST1H4I;HIST1H4D;HIST4H4;HIST1H4E;HIST2H4AA3;HIST2H4AA4 Histone H2A type 2-A |
| Gene_Symbol=HIST2H2BC Histone H2B type 2-C                                                                                                                        |
| Gene_Symbol=HIST2H3A;HIST2H3C Histone H3.2                                                                                                                        |
| Gene_Symbol=HK1 Isoform 1 of Hexokinase-1                                                                                                                         |
| Gene_Symbol=HLA-A HLA class I histocompatibility antigen, A-69 alpha chain                                                                                        |
| Gene_Symbol=HLA-A Isoform 2 of HLA class I histocompatibility antigen, A-11 alpha chain precursor                                                                 |
| Gene_Symbol=HLA-C;HLA-B;MICA;LOC730410 HLA class I histocompatibility antigen, B-58 alpha chain precursor                                                         |
| Gene_Symbol=HLA-C;HLA-B;MICA;LOC730410 HLA class I histocompatibility antigen, Cw-2 alpha chain precursor                                                         |
| Gene_Symbol=HMBS Isoform 1 of Porphobilinogen deaminase                                                                                                           |
| Gene_Symbol=HMGB1 High mobility group protein B1                                                                                                                  |
| Gene_Symbol=HMGB2 High mobility group protein B2                                                                                                                  |
| Gene_Symbol=HMGB3 High mobility group protein B3                                                                                                                  |
| Gene_Symbol=HN1 Isoform 2 of Hematological and neurological expressed 1 protein                                                                                   |
| Gene_Symbol=HNRPA0 Heterogeneous nuclear ribonucleoprotein A0                                                                                                     |
| Gene_Symbol=HNRPA1;HNRPA1L-2 Isoform A1-B of Heterogeneous nuclear ribonucleoprotein A1                                                                           |
| Gene_Symbol=HNRPA2B1 Isoform B1 of Heterogeneous nuclear ribonucleoproteins A2/B1                                                                                 |
| Gene_Symbol=HNRPA3 Isoform 1 of Heterogeneous nuclear ribonucleoprotein A3                                                                                        |
| Gene_Symbol=HNRPA3 Isoform 2 of Heterogeneous nuclear ribonucleoprotein A/B                                                                                       |
| Gene_Symbol=HNRPC Isoform C1 of Heterogeneous nuclear ribonucleoproteins C1/C2                                                                                    |
| Gene_Symbol=HNRPC Isoform C2 of Heterogeneous nuclear ribonucleoproteins C1/C2                                                                                    |
| Gene_Symbol=HNRPDL JKTBP1delta6                                                                                                                                   |
| Gene_Symbol=HNRPF Heterogeneous nuclear ribonucleoprotein F                                                                                                       |
| Gene_Symbol=HNRPH1 Heterogeneous nuclear ribonucleoprotein H                                                                                                      |
| Gene_Symbol=HNRPH2 Heterogeneous nuclear ribonucleoprotein H'                                                                                                     |
| Gene_Symbol=HNRPH3 Isoform 1 of Heterogeneous nuclear ribonucleoprotein H3                                                                                        |
| Gene_Symbol=HNRPK Isoform 3 of Heterogeneous nuclear ribonucleoprotein K                                                                                          |
| Gene_Symbol=HNRPL heterogeneous nuclear ribonucleoprotein L isoform a                                                                                             |
| Gene_Symbol=HNRPM Isoform 1 of Heterogeneous nuclear ribonucleoprotein M                                                                                          |
| Gene_Symbol=HNRPR Heterogeneous nuclear ribonucleoprotein R                                                                                                       |
| Gene_Symbol=HNRPJ heterogeneous nuclear ribonucleoprotein U isoform a                                                                                             |
| Gene_Symbol=HNRPU heterogeneous nuclear ribonucleoprotein U isoform a                                                                                             |
| Gene_Symbol=HNRPUL1 Isoform 1 of Heterogeneous nuclear ribonucleoprotein U-like protein 1                                                                         |
| Gene_Symbol=HNRPUL2 Heterogeneous nuclear ribonucleoprotein U-like protein 2                                                                                      |
| Gene_Symbol=HP1BP3 HP1-BP74                                                                                                                                       |
| Gene_Symbol=HPRT1 Hypoxanthine-guanine phosphoribosyltransferase                                                                                                  |
| Gene_Symbol=HSP90AA1 Heat shock protein HSP 90-alpha 2                                                                                                            |
| Gene_Symbol=HSP90AB1 85 kDa protein                                                                                                                               |
| Gene_Symbol=HSP90B1 Endoplasmic precursor                                                                                                                         |
| Gene_Symbol=HSPA1B;HSPA1A Heat shock 70 kDa protein 1                                                                                                             |
| Gene_Symbol=HSPA4 Heat shock 70 kDa protein 4                                                                                                                     |
| Gene_Symbol=HSPA4L Heat shock 70 kDa protein 4L                                                                                                                   |
| Gene_Symbol=HSPA5 HSPA5 protein                                                                                                                                   |
| Gene_Symbol=HSPA8 Isoform 1 of Heat shock cognate 71 kDa protein                                                                                                  |
| Gene_Symbol=HSPA9 Stress-70 protein, mitochondrial precursor                                                                                                      |
| Gene_Symbol=HSPB1 Heat-shock protein beta-1                                                                                                                       |
| Gene_Symbol=HSPD1 60 kDa heat shock protein, mitochondrial precursor                                                                                              |
| Gene_Symbol=HSPE1 10 kDa heat shock protein, mitochondrial                                                                                                        |
| Gene_Symbol=HSPG2 Basement membrane-specific heparan sulfate proteoglycan core protein precursor                                                                  |
| Gene_Symbol=HSPH1 Isoform Alpha of Heat-shock protein 105 kDa                                                                                                     |
| Gene_Symbol=HTATIP2 Isoform 2 of Oxidoreductase HTATIP2                                                                                                           |

|                                                                                                              |
|--------------------------------------------------------------------------------------------------------------|
| Gene_Symbol=HYOU1 150 kDa oxygen-regulated protein precursor                                                 |
| Gene_Symbol=IARS Isoleucyl-tRNA synthetase, cytoplasmic                                                      |
| Gene_Symbol=ICOSLG 52 kDa protein                                                                            |
| Gene_Symbol=IDH1 Isocitrate dehydrogenase [NADP] cytoplasmic                                                 |
| Gene_Symbol=IDH2 Isocitrate dehydrogenase [NADP], mitochondrial precursor                                    |
| Gene_Symbol=IDI1 isopentenyl-diphosphate delta isomerase                                                     |
| Gene_Symbol=IGF2R Cation-independent mannose-6-phosphate receptor precursor                                  |
| Gene_Symbol=IGFBP2 Insulin-like growth factor-binding protein 2 precursor                                    |
| Gene_Symbol=IGFBP3 insulin-like growth factor binding protein 3 isoform a precursor                          |
| Gene_Symbol=IGFBPL1 Insulin-like growth factor binding protein-like 1                                        |
| Gene_Symbol=IL17C Interleukin-17C precursor                                                                  |
| Gene_Symbol=ILF2 Interleukin enhancer-binding factor 2                                                       |
| Gene_Symbol=ILF3 Isoform 1 of Interleukin enhancer-binding factor 3                                          |
| Gene_Symbol=ILF3 Isoform 5 of Interleukin enhancer-binding factor 3                                          |
| Gene_Symbol=IMMT Isoform 2 of Mitochondrial inner membrane protein                                           |
| Gene_Symbol=IMPA1 Inositol monophosphatase                                                                   |
| Gene_Symbol=IMPDH2 Inosine-5'-monophosphate dehydrogenase 2                                                  |
| Gene_Symbol=INSM1 Insulinoma-associated protein 1                                                            |
| Gene_Symbol=IPO7 120 kDa protein                                                                             |
| Gene_Symbol=IQGAP1 Ras GTPase-activating-like protein IQGAP1                                                 |
| Gene_Symbol=ISG15 Interferon-induced 17 kDa protein precursor                                                |
| Gene_Symbol=ITPA inosine triphosphatase isoform b                                                            |
| Gene_Symbol=KARS Lysyl-tRNA synthetase                                                                       |
| Gene_Symbol=KCTD12 BTB/POZ domain-containing protein KCTD12                                                  |
| Gene_Symbol=KHDRBS1 Isoform 3 of KH domain-containing, RNA-binding, signal transduction-associated protein 1 |
| Gene_Symbol=KIAA0310 hypothetical protein LOC9919                                                            |
| Gene_Symbol=KIAA1598 Protein KIAA1598                                                                        |
| Gene_Symbol=KIF5B Kinesin heavy chain                                                                        |
| Gene_Symbol=KIT Mast/stem cell growth factor receptor precursor                                              |
| Gene_Symbol=KLC1 Isoform K of Kinesin light chain 1                                                          |
| Gene_Symbol=KLK11 Isoform 1 of Kallikrein-11 precursor                                                       |
| Gene_Symbol=KLK14 kallikrein 14 preproprotein                                                                |
| Gene_Symbol=KPNA2 Importin alpha-2 subunit                                                                   |
| Gene_Symbol=KPNB1 Importin beta-1 subunit                                                                    |
| Gene_Symbol=KRT18 Keratin, type I cytoskeletal 18                                                            |
| Gene_Symbol=KRT19 Keratin, type I cytoskeletal 19                                                            |
| Gene_Symbol=KRT7 Keratin, type II cytoskeletal 7                                                             |
| Gene_Symbol=KRT8 Keratin, type II cytoskeletal 8                                                             |
| Gene_Symbol=KTN1 Isoform 1 of Kinectin                                                                       |
| Gene_Symbol=LAMA1 Laminin subunit alpha-1 precursor                                                          |
| Gene_Symbol=LAMB1 Laminin subunit beta-1 precursor                                                           |
| Gene_Symbol=LAMB2 Laminin subunit beta-2 precursor                                                           |
| Gene_Symbol=LAMC1 Laminin subunit gamma-1 precursor                                                          |
| Gene_Symbol=LARS Leucyl-tRNA synthetase, cytoplasmic                                                         |
| Gene_Symbol=LCP1 Plastin-2                                                                                   |
| Gene_Symbol=LDHA Isoform 1 of L-lactate dehydrogenase A chain                                                |
| Gene_Symbol=LDHB L-lactate dehydrogenase B chain                                                             |
| Gene_Symbol=LEMD3 Inner nuclear membrane protein Man1                                                        |
| Gene_Symbol=LFNG Isoform 1 of Beta-1,3-N-acetylglucosaminyltransferase lunatic fringe                        |
| Gene_Symbol=LGALS3BP Galectin-3-binding protein precursor                                                    |
| Gene_Symbol=LGMN Legumain precursor                                                                          |
| Gene_Symbol=LIPG Isoform 1 of Endothelial lipase precursor                                                   |
| Gene_Symbol=LMAN1 ERGIC-53 protein precursor                                                                 |
| Gene_Symbol=LMAN2 Vesicular integral-membrane protein VIP36 precursor                                        |
| Gene_Symbol=LMNA Isoform C of Lamin-A/C                                                                      |
| Gene_Symbol=LMNB1 Lamin-B1                                                                                   |
| Gene_Symbol=LMNB2 Lamin B2                                                                                   |
| Gene_Symbol=LOC196463 Hypothetical protein LOC196463                                                         |
| Gene_Symbol=LOC253012 WLKV305                                                                                |
| Gene_Symbol=LOC388720 similar to ubiquitin and ribosomal protein S27a precursor                              |
| Gene_Symbol=LOC440055 similar to ribosomal protein S12                                                       |
| Gene_Symbol=LOC652595 BA395L14.12                                                                            |
| Gene_Symbol=LOC728641;FABP5;LOC731043 Fatty acid-binding protein, epidermal                                  |



|                                                                                                             |
|-------------------------------------------------------------------------------------------------------------|
| Gene_Symbol=LOC731751 similar to protein kinase, DNA-activated, catalytic polypeptide                       |
| Gene_Symbol=LPP Lipoma-preferred partner                                                                    |
| Gene_Symbol=LRBA Lipopolysaccharide-responsive and beige-like anchor protein                                |
| Gene_Symbol=LRRRC59 Leucine-rich repeat-containing protein 59                                               |
| Gene_Symbol=LRRFIP1 Isoform 1 of Leucine-rich repeat flightless-interacting protein 1                       |
| Gene_Symbol=LSR Isoform 2 of Lipolysis-stimulated lipoprotein receptor                                      |
| Gene_Symbol=LTA4H Isoform 1 of Leukotriene A-4 hydrolase                                                    |
| Gene_Symbol=LTB4DH NADP-dependent leukotriene B4 12-hydroxydehydrogenase                                    |
| Gene_Symbol=LUC7L2 Isoform 1 of Putative RNA-binding protein Luc7-like 2                                    |
| Gene_Symbol=M6PRBP1 Isoform B of Mannose-6-phosphate receptor-binding protein 1                             |
| Gene_Symbol=MAGEA10 Melanoma-associated antigen 10                                                          |
| Gene_Symbol=MAGEA4 Melanoma-associated antigen 4                                                            |
| Gene_Symbol=MAN1A1 Mannosyl-oligosaccharide 1,2-alpha-mannosidase IA                                        |
| Gene_Symbol=MAN1A2 Mannosyl-oligosaccharide 1,2-alpha-mannosidase IB                                        |
| Gene_Symbol=MAP1B Microtubule-associated protein 1B                                                         |
| Gene_Symbol=MAP2 Isoform 1 of Microtubule-associated protein 2                                              |
| Gene_Symbol=MAP2K1 Dual specificity mitogen-activated protein kinase kinase 1                               |
| Gene_Symbol=MAP4 Isoform 1 of Microtubule-associated protein 4                                              |
| Gene_Symbol=MAPRE1 Microtubule-associated protein RP/EB family member 1                                     |
| Gene_Symbol=MARS Methionyl-tRNA synthetase, cytoplasmic                                                     |
| Gene_Symbol=MATN2 Isoform 2 of Matrilin-2 precursor                                                         |
| Gene_Symbol=MATR3 100 kDa protein                                                                           |
| Gene_Symbol=MCM3 DNA replication licensing factor MCM3                                                      |
| Gene_Symbol=MCM6 DNA replication licensing factor MCM6                                                      |
| Gene_Symbol=MDC1 Isoform 1 of Mediator of DNA damage checkpoint protein 1                                   |
| Gene_Symbol=MDH1 Malate dehydrogenase, cytoplasmic                                                          |
| Gene_Symbol=MDH2 Malate dehydrogenase, mitochondrial precursor                                              |
| Gene_Symbol=MDK Midkine precursor                                                                           |
| Gene_Symbol=ME1 NADP-dependent malic enzyme                                                                 |
| Gene_Symbol=MESDC2 Mesoderm development candidate 2                                                         |
| Gene_Symbol=MGAT4A mannosyl (alpha-1,3-)-glycoprotein beta-1,4-N-acetylglucosaminyltransferase, isoenzyme A |
| Gene_Symbol=MIA3 similar to melanoma inhibitory activity 3 isoform 1                                        |
| Gene_Symbol=MIF Macrophage migration inhibitory factor                                                      |
| Gene_Symbol=MLLT4 Isoform 4 of Afadin                                                                       |
| Gene_Symbol=MMP1 Interstitial collagenase precursor                                                         |
| Gene_Symbol=MRLC2 Myosin regulatory light chain                                                             |
| Gene_Symbol=MRPL12 39S ribosomal protein L12, mitochondrial precursor                                       |
| Gene_Symbol=MSN Moesin                                                                                      |
| Gene_Symbol=MTA2 Metastasis-associated protein MTA2                                                         |
| Gene_Symbol=MTPN Myotrophin                                                                                 |
| Gene_Symbol=MUC1 Isoform 1 of Mucin-1 precursor                                                             |
| Gene_Symbol=MUC13 Mucin-13 precursor                                                                        |
| Gene_Symbol=MYH9 Myosin-9                                                                                   |
| Gene_Symbol=MYL6 Isoform Smooth muscle of Myosin light polypeptide 6                                        |
| Gene_Symbol=MYO6 Isoform 2 of Myosin-VI                                                                     |
| Gene_Symbol=NACA Similar to Nascent polypeptide associated complex alpha subunit                            |
| Gene_Symbol=NAP1L1 Nucleosome assembly protein 1-like 1                                                     |
| Gene_Symbol=NAP1L4 Nucleosome assembly protein 1-like 4                                                     |
| Gene_Symbol=NAPG Gamma-soluble NSF attachment protein                                                       |
| Gene_Symbol=NARS Asparaginyl-tRNA synthetase, cytoplasmic                                                   |
| Gene_Symbol=NASP Isoform 1 of Nuclear autoantigenic sperm protein                                           |
| Gene_Symbol=NCAM1 Neural cell adhesion molecule 1, 140 kDa isoform precursor                                |
| Gene_Symbol=NCBP1 Nuclear cap-binding protein subunit 1                                                     |
| Gene_Symbol=NCL Isoform 1 of Nucleolin                                                                      |
| Gene_Symbol=NDRG1 Protein NDRG1                                                                             |
| Gene_Symbol=NDUFV2 NADH dehydrogenase [ubiquinone] flavoprotein 2, mitochondrial precursor                  |
| Gene_Symbol=NEDD8 NEDD8 precursor                                                                           |
| Gene_Symbol=NELL1 Protein kinase C-binding protein NELL1 precursor                                          |
| Gene_Symbol=NEU1 Sialidase-1 precursor                                                                      |
| Gene_Symbol=NFASC Isoform 7 of Neurofascin precursor                                                        |
| Gene_Symbol=NHP2L1 NHP2-like protein 1                                                                      |
| Gene_Symbol=NID1 Isoform 1 of Nidogen-1 precursor                                                           |
| Gene_Symbol=NIPSNAP1 Protein NipSnap1                                                                       |

|                                                                                                     |
|-----------------------------------------------------------------------------------------------------|
| Gene_Symbol=NIPSNAP3A Protein NipSnap3A                                                             |
| Gene_Symbol=NIT1 Isoform 2 of Nitrilase homolog 1                                                   |
| Gene_Symbol=NIT2 Nitrilase family member 2                                                          |
| Gene_Symbol=NME1 NME1-NME2 protein                                                                  |
| Gene_Symbol=NNT NAD(P) transhydrogenase, mitochondrial precursor                                    |
| Gene_Symbol=NOL5A Nucleolar protein Nop56                                                           |
| Gene_Symbol=NONO Non-POU domain-containing octamer-binding protein                                  |
| Gene_Symbol=NOP5/NOP58 Nucleolar protein NOP5                                                       |
| Gene_Symbol=NOV Protein NOV homolog precursor                                                       |
| Gene_Symbol=NP CDNA FLJ25678 fis, clone TST04067, highly similar to PURINE NUCLEOSIDE PHOSPHORYLASE |
| Gene_Symbol=NPC2 Epididymal secretory protein E1 precursor                                          |
| Gene_Symbol=NPEPPS Puromycin-sensitive aminopeptidase                                               |
| Gene_Symbol=NPM1 Isoform 2 of Nucleophosmin                                                         |
| Gene_Symbol=NPTX1 similar to neuronal pentraxin I precursor                                         |
| Gene_Symbol=NQO1 NAD                                                                                |
| Gene_Symbol=NQO2 Ribosylidihyronicotinamide dehydrogenase                                           |
| Gene_Symbol=NRCAM Isoform 1 of Neuronal cell adhesion molecule precursor                            |
| Gene_Symbol=NRCAM NRCAM protein                                                                     |
| Gene_Symbol=NRP1 Isoform 1 of Neuropilin-1 precursor                                                |
| Gene_Symbol=NSF Vesicle-fusing ATPase                                                               |
| Gene_Symbol=NSFL1C Isoform 2 of NSFL1 cofactor p47                                                  |
| Gene_Symbol=NT5C3 Isoform 2 of Cytosolic 5'-nucleotidase III                                        |
| Gene_Symbol=NUCB1 Nucleobindin-1 precursor                                                          |
| Gene_Symbol=NUCB2 Nucleobindin-2 precursor                                                          |
| Gene_Symbol=NUCKS1 Isoform 1 of Nuclear ubiquitous casein and cyclin-dependent kinases substrate    |
| Gene_Symbol=NUDC Nuclear migration protein nudC                                                     |
| Gene_Symbol=NUDT21 Cleavage and polyadenylation specificity factor 5                                |
| Gene_Symbol=NUDT5 ADP-sugar pyrophosphatase                                                         |
| Gene_Symbol=NUDT9 Isoform 1 of ADP-ribose pyrophosphatase, mitochondrial precursor                  |
| Gene_Symbol=NUMA1 Isoform 2 of Nuclear mitotic apparatus protein 1                                  |
| Gene_Symbol=NUTF2 Nuclear transport factor 2                                                        |
| Gene_Symbol=OCIAD1 OCIA domain containing 1 isoform 1                                               |
| Gene_Symbol=OPA1 Isoform 1 of Dynamin-like 120 kDa protein, mitochondrial precursor                 |
| Gene_Symbol=OS9 76 kDa protein                                                                      |
| Gene_Symbol=OTUB1 Hypothetical protein DKFZp564E242                                                 |
| Gene_Symbol=P4HB Protein disulfide-isomerase precursor                                              |
| Gene_Symbol=PA2G4 Proliferation-associated protein 2G4                                              |
| Gene_Symbol=PABPC1 Isoform 1 of Polyadenylate-binding protein 1                                     |
| Gene_Symbol=PFAFH1B2 Platelet-activating factor acetylhydrolase IB subunit beta                     |
| Gene_Symbol=PAGE2B Putative G antigen family E member 3                                             |
| Gene_Symbol=PAICS Multifunctional protein ADE2                                                      |
| Gene_Symbol=PAK2 similar to p21-activated kinase 2                                                  |
| Gene_Symbol=PAM Isoform 3 of Peptidyl-glycine alpha-amidating monooxygenase precursor               |
| Gene_Symbol=PARK7 Protein DJ-1                                                                      |
| Gene_Symbol=PARP1 Poly [ADP-ribose] polymerase 1                                                    |
| Gene_Symbol=PBEF1 Isoform 1 of Nicotinamide phosphoribosyltransferase                               |
| Gene_Symbol=PCBD1 Pterin-4-alpha-carbinolamine dehydratase                                          |
| Gene_Symbol=PCBP1 Poly(rC)-binding protein 1                                                        |
| Gene_Symbol=PCBP2 poly(rC)-binding protein 2 isoform b                                              |
| Gene_Symbol=PCDH1 protocadherin 1 isoform 2 precursor                                               |
| Gene_Symbol=PCDHB10 Protocadherin beta 10 precursor                                                 |
| Gene_Symbol=PCDHB5 Protocadherin beta 5 precursor                                                   |
| Gene_Symbol=PCK2 Phosphoenolpyruvate carboxykinase [GTP], mitochondrial precursor                   |
| Gene_Symbol=PCNA Proliferating cell nuclear antigen                                                 |
| Gene_Symbol=PCSK1 Neuroendocrine convertase 1 precursor                                             |
| Gene_Symbol=PCSK2 Neuroendocrine convertase 2 precursor                                             |
| Gene_Symbol=PCSK6 Isoform PACE4E-II of Proprotein convertase subtilisin/kexin type 6 precursor      |
| Gene_Symbol=PCSK9 Isoform 1 of Proprotein convertase subtilisin/kexin type 9 precursor              |
| Gene_Symbol=PDCD6IP PDCD6IP protein                                                                 |
| Gene_Symbol=PDGFD Isoform 2 of Platelet-derived growth factor D precursor                           |
| Gene_Symbol=PDIA3 Protein disulfide-isomerase A3 precursor                                          |
| Gene_Symbol=PDIA4 Protein disulfide-isomerase A4 precursor                                          |
| Gene_Symbol=PDIA6 Isoform 2 of Protein disulfide-isomerase A6 precursor                             |

|                                                                                     |
|-------------------------------------------------------------------------------------|
| Gene_Symbol=PEBP1 Phosphatidylethanolamine-binding protein 1                        |
| Gene_Symbol=PFDN2 Prefoldin subunit 2                                               |
| Gene_Symbol=PFDN4 Prefoldin subunit 4                                               |
| Gene_Symbol=PFN1 Profilin-1                                                         |
| Gene_Symbol=PFN2 Isoform 1Ib of Profilin-2                                          |
| Gene_Symbol=PGD 6-phosphogluconate dehydrogenase, decarboxylating                   |
| Gene_Symbol=PGK1 Phosphoglycerate kinase 1                                          |
| Gene_Symbol=PGLS 6-phosphogluconolactonase                                          |
| Gene_Symbol=PGM2 Phosphoglucomutase-2                                               |
| Gene_Symbol=PGRMC1 Membrane-associated progesterone receptor component 1            |
| Gene_Symbol=PHGDH D-3-phosphoglycerate dehydrogenase                                |
| Gene_Symbol=PHPT1 14 kDa phosphohistidine phosphatase                               |
| Gene_Symbol=PIR Pirin                                                               |
| Gene_Symbol=PITX1;H2AFY H2A histone family, member Y isoform 2                      |
| Gene_Symbol=PKM2 Isoform M2 of Pyruvate kinase isozymes M1/M2                       |
| Gene_Symbol=PLEC1 plectin 1 isoform 1                                               |
| Gene_Symbol=PLEC1 plectin 1 isoform 10                                              |
| Gene_Symbol=PLG Plasminogen precursor                                               |
| Gene_Symbol=PLOD1 Procollagen-lysine,2-oxoglutarate 5-dioxygenase 1 precursor       |
| Gene_Symbol=PLOD3 Procollagen-lysine,2-oxoglutarate 5-dioxygenase 3 precursor       |
| Gene_Symbol=PLRG1 Isoform 1 of Pleiotropic regulator 1                              |
| Gene_Symbol=PLXDC2 Isoform 1 of Plexin domain-containing protein 2 precursor        |
| Gene_Symbol=PNN Protein                                                             |
| Gene_Symbol=POFUT1 Isoform 1 of GDP-fucose protein O-fucosyltransferase 1 precursor |
| Gene_Symbol=PPA1 Inorganic pyrophosphatase                                          |
| Gene_Symbol=PPA2 Isoform 1 of Inorganic pyrophosphatase 2, mitochondrial precursor  |
| Gene_Symbol=PPIA;LOC654188;LOC653214 Peptidyl-prolyl cis-trans isomerase A          |
| Gene_Symbol=PIIB peptidylprolyl isomerase B precursor                               |
| Gene_Symbol=PIIF Peptidyl-prolyl cis-trans isomerase, mitochondrial precursor       |
| Gene_Symbol=PPM1A Isoform Alpha-1 of Protein phosphatase 2C isoform alpha           |
| Gene_Symbol=PPM1E Protein phosphatase 1E                                            |
| Gene_Symbol=PPP1CB Serine/threonine-protein phosphatase PP1-beta catalytic subunit  |
| Gene_Symbol=PPP1R14B Similar to Protein phosphatase 1 regulatory subunit 14B        |
| Gene_Symbol=PPP2R1A alpha isoform of regulatory subunit A, protein phosphatase 2    |
| Gene_Symbol=PPT1 Palmitoyl-protein thioesterase 1                                   |
| Gene_Symbol=PRCP prolylcarboxypeptidase isoform 2 preproprotein                     |
| Gene_Symbol=PRDX1 Peroxiredoxin-1                                                   |
| Gene_Symbol=PRDX2 Peroxiredoxin-2                                                   |
| Gene_Symbol=PRDX3 Thioredoxin-dependent peroxide reductase, mitochondrial precursor |
| Gene_Symbol=PRDX4 Peroxiredoxin-4                                                   |
| Gene_Symbol=PRDX5 Isoform Mitochondrial of Peroxiredoxin-5, mitochondrial precursor |
| Gene_Symbol=PRDX6 Peroxiredoxin-6                                                   |
| Gene_Symbol=PRKCSH Glucosidase 2 subunit beta precursor                             |
| Gene_Symbol=PRKDC Isoform 1 of DNA-dependent protein kinase catalytic subunit       |
| Gene_Symbol=PRMT5 Protein arginine N-methyltransferase 5                            |
| Gene_Symbol=PROM1 Prominin-1 precursor                                              |
| Gene_Symbol=PROS1 Vitamin K-dependent protein S precursor                           |
| Gene_Symbol=PRPF19 Pre-mRNA-processing factor 19                                    |
| Gene_Symbol=PRPF6 Pre-mRNA-processing factor 6                                      |
| Gene_Symbol=PRSS1 Trypsin-1 precursor                                               |
| Gene_Symbol=PRSS2 Protease serine 2 isoform B                                       |
| Gene_Symbol=PSAP Isoform Sap-mu-0 of Proactivator polypeptide precursor             |
| Gene_Symbol=PSIP1 Isoform 1 of PC4 and SFRS1-interacting protein                    |
| Gene_Symbol=PSMA1 Isoform Short of Proteasome subunit alpha type 1                  |
| Gene_Symbol=PSMA2 Proteasome subunit alpha type 2                                   |
| Gene_Symbol=PSMA4 PSMA4 protein                                                     |
| Gene_Symbol=PSMA5 Proteasome subunit alpha type 5                                   |
| Gene_Symbol=PSMA6 Proteasome subunit alpha type 6                                   |
| Gene_Symbol=PSMA7 Isoform 1 of Proteasome subunit alpha type 7                      |
| Gene_Symbol=PSMB1 Proteasome subunit beta type 1 precursor                          |
| Gene_Symbol=PSMB2 Proteasome subunit beta type 2                                    |
| Gene_Symbol=PSMB3 Proteasome subunit beta type 3                                    |
| Gene_Symbol=PSMB4 Proteasome subunit beta type 4 precursor                          |

|                                                                                                                                                                                                                                                                                                                                                                                                                                                                                                                                                                                                                                                                                                                                                                                                                                                                                                                                                                                                                                                                                                                                                                                                                                                                                                                                                                                                                |
|----------------------------------------------------------------------------------------------------------------------------------------------------------------------------------------------------------------------------------------------------------------------------------------------------------------------------------------------------------------------------------------------------------------------------------------------------------------------------------------------------------------------------------------------------------------------------------------------------------------------------------------------------------------------------------------------------------------------------------------------------------------------------------------------------------------------------------------------------------------------------------------------------------------------------------------------------------------------------------------------------------------------------------------------------------------------------------------------------------------------------------------------------------------------------------------------------------------------------------------------------------------------------------------------------------------------------------------------------------------------------------------------------------------|
| Gene_Symbol=PSMB7 Proteasome subunit beta type 7 precursor                                                                                                                                                                                                                                                                                                                                                                                                                                                                                                                                                                                                                                                                                                                                                                                                                                                                                                                                                                                                                                                                                                                                                                                                                                                                                                                                                     |
| Gene_Symbol=PSMB8 Isoform 1 of Proteasome subunit beta type 8 precursor                                                                                                                                                                                                                                                                                                                                                                                                                                                                                                                                                                                                                                                                                                                                                                                                                                                                                                                                                                                                                                                                                                                                                                                                                                                                                                                                        |
| Gene_Symbol=PSMC5 26S protease regulatory subunit 8                                                                                                                                                                                                                                                                                                                                                                                                                                                                                                                                                                                                                                                                                                                                                                                                                                                                                                                                                                                                                                                                                                                                                                                                                                                                                                                                                            |
| Gene_Symbol=PSMD1 Isoform 1 of 26S proteasome non-ATPase regulatory subunit 1                                                                                                                                                                                                                                                                                                                                                                                                                                                                                                                                                                                                                                                                                                                                                                                                                                                                                                                                                                                                                                                                                                                                                                                                                                                                                                                                  |
| Gene_Symbol=PSMD11 Proteasome 26S non-ATPase subunit 11 variant (Fragment)                                                                                                                                                                                                                                                                                                                                                                                                                                                                                                                                                                                                                                                                                                                                                                                                                                                                                                                                                                                                                                                                                                                                                                                                                                                                                                                                     |
| Gene_Symbol=PSMD12 26S proteasome non-ATPase regulatory subunit 12                                                                                                                                                                                                                                                                                                                                                                                                                                                                                                                                                                                                                                                                                                                                                                                                                                                                                                                                                                                                                                                                                                                                                                                                                                                                                                                                             |
| Gene_Symbol=PSMD13 proteasome 26S non-ATPase subunit 13 isoform 2                                                                                                                                                                                                                                                                                                                                                                                                                                                                                                                                                                                                                                                                                                                                                                                                                                                                                                                                                                                                                                                                                                                                                                                                                                                                                                                                              |
| Gene_Symbol=PSMD2 26S proteasome non-ATPase regulatory subunit 2                                                                                                                                                                                                                                                                                                                                                                                                                                                                                                                                                                                                                                                                                                                                                                                                                                                                                                                                                                                                                                                                                                                                                                                                                                                                                                                                               |
| Gene_Symbol=PSMD3 26S proteasome non-ATPase regulatory subunit 3                                                                                                                                                                                                                                                                                                                                                                                                                                                                                                                                                                                                                                                                                                                                                                                                                                                                                                                                                                                                                                                                                                                                                                                                                                                                                                                                               |
| Gene_Symbol=PSMD7 26S proteasome non-ATPase regulatory subunit 7                                                                                                                                                                                                                                                                                                                                                                                                                                                                                                                                                                                                                                                                                                                                                                                                                                                                                                                                                                                                                                                                                                                                                                                                                                                                                                                                               |
| Gene_Symbol=PSME1 29 kDa protein                                                                                                                                                                                                                                                                                                                                                                                                                                                                                                                                                                                                                                                                                                                                                                                                                                                                                                                                                                                                                                                                                                                                                                                                                                                                                                                                                                               |
| Gene_Symbol=PSME2 Proteasome activator complex subunit 2                                                                                                                                                                                                                                                                                                                                                                                                                                                                                                                                                                                                                                                                                                                                                                                                                                                                                                                                                                                                                                                                                                                                                                                                                                                                                                                                                       |
| Gene_Symbol=PTBP1 Isoform 1 of Polypyrimidine tract-binding protein 1                                                                                                                                                                                                                                                                                                                                                                                                                                                                                                                                                                                                                                                                                                                                                                                                                                                                                                                                                                                                                                                                                                                                                                                                                                                                                                                                          |
| Gene_Symbol=PTGES3 Prostaglandin E synthase 3                                                                                                                                                                                                                                                                                                                                                                                                                                                                                                                                                                                                                                                                                                                                                                                                                                                                                                                                                                                                                                                                                                                                                                                                                                                                                                                                                                  |
| Gene_Symbol=PTGFRN Prostaglandin F2 receptor negative regulator precursor                                                                                                                                                                                                                                                                                                                                                                                                                                                                                                                                                                                                                                                                                                                                                                                                                                                                                                                                                                                                                                                                                                                                                                                                                                                                                                                                      |
| Gene_Symbol=PTPLAD1 Protein-tyrosine phosphatase-like A domain-containing protein 1                                                                                                                                                                                                                                                                                                                                                                                                                                                                                                                                                                                                                                                                                                                                                                                                                                                                                                                                                                                                                                                                                                                                                                                                                                                                                                                            |
| Gene_Symbol=PTPN11 Isoform 2 of Tyrosine-protein phosphatase non-receptor type 11                                                                                                                                                                                                                                                                                                                                                                                                                                                                                                                                                                                                                                                                                                                                                                                                                                                                                                                                                                                                                                                                                                                                                                                                                                                                                                                              |
| Gene_Symbol=PTPRF protein tyrosine phosphatase, receptor type, F isoform 2 precursor                                                                                                                                                                                                                                                                                                                                                                                                                                                                                                                                                                                                                                                                                                                                                                                                                                                                                                                                                                                                                                                                                                                                                                                                                                                                                                                           |
| Gene_Symbol=PTPRF Receptor-type tyrosine-protein phosphatase F precursor                                                                                                                                                                                                                                                                                                                                                                                                                                                                                                                                                                                                                                                                                                                                                                                                                                                                                                                                                                                                                                                                                                                                                                                                                                                                                                                                       |
| Gene_Symbol=PTPRK Receptor-type tyrosine-protein phosphatase kappa precursor                                                                                                                                                                                                                                                                                                                                                                                                                                                                                                                                                                                                                                                                                                                                                                                                                                                                                                                                                                                                                                                                                                                                                                                                                                                                                                                                   |
| Gene_Symbol=PYGB Glycogen phosphorylase, brain form                                                                                                                                                                                                                                                                                                                                                                                                                                                                                                                                                                                                                                                                                                                                                                                                                                                                                                                                                                                                                                                                                                                                                                                                                                                                                                                                                            |
| Gene_Symbol=PYGL Glycogen phosphorylase, liver form                                                                                                                                                                                                                                                                                                                                                                                                                                                                                                                                                                                                                                                                                                                                                                                                                                                                                                                                                                                                                                                                                                                                                                                                                                                                                                                                                            |
| Gene_Symbol=QARS Glutamyl-tRNA synthetase                                                                                                                                                                                                                                                                                                                                                                                                                                                                                                                                                                                                                                                                                                                                                                                                                                                                                                                                                                                                                                                                                                                                                                                                                                                                                                                                                                      |
| Gene_Symbol=QSCN6 Isoform 1 of Sulfhydryl oxidase 1 precursor                                                                                                                                                                                                                                                                                                                                                                                                                                                                                                                                                                                                                                                                                                                                                                                                                                                                                                                                                                                                                                                                                                                                                                                                                                                                                                                                                  |
| Gene_Symbol=QSCN6L1 78 kDa protein                                                                                                                                                                                                                                                                                                                                                                                                                                                                                                                                                                                                                                                                                                                                                                                                                                                                                                                                                                                                                                                                                                                                                                                                                                                                                                                                                                             |
| Gene_Symbol=RAB14 Ras-related protein Rab-14                                                                                                                                                                                                                                                                                                                                                                                                                                                                                                                                                                                                                                                                                                                                                                                                                                                                                                                                                                                                                                                                                                                                                                                                                                                                                                                                                                   |
| Gene_Symbol=RAB2A 21 kDa protein                                                                                                                                                                                                                                                                                                                                                                                                                                                                                                                                                                                                                                                                                                                                                                                                                                                                                                                                                                                                                                                                                                                                                                                                                                                                                                                                                                               |
| Gene_Symbol=RAB7A Ras-related protein Rab-7                                                                                                                                                                                                                                                                                                                                                                                                                                                                                                                                                                                                                                                                                                                                                                                                                                                                                                                                                                                                                                                                                                                                                                                                                                                                                                                                                                    |
| Gene_Symbol=RAD23B UV excision repair protein RAD23 homolog B                                                                                                                                                                                                                                                                                                                                                                                                                                                                                                                                                                                                                                                                                                                                                                                                                                                                                                                                                                                                                                                                                                                                                                                                                                                                                                                                                  |
| Gene_Symbol=RALY RNA binding protein (Fragment)                                                                                                                                                                                                                                                                                                                                                                                                                                                                                                                                                                                                                                                                                                                                                                                                                                                                                                                                                                                                                                                                                                                                                                                                                                                                                                                                                                |
| Gene_Symbol=RAN 26 kDa protein                                                                                                                                                                                                                                                                                                                                                                                                                                                                                                                                                                                                                                                                                                                                                                                                                                                                                                                                                                                                                                                                                                                                                                                                                                                                                                                                                                                 |
| Gene_Symbol=RANBP1 Ran-specific GTPase-activating protein                                                                                                                                                                                                                                                                                                                                                                                                                                                                                                                                                                                                                                                                                                                                                                                                                                                                                                                                                                                                                                                                                                                                                                                                                                                                                                                                                      |
| Gene_Symbol=RANBP2 E3 SUMO-protein ligase RanBP2                                                                                                                                                                                                                                                                                                                                                                                                                                                                                                                                                                                                                                                                                                                                                                                                                                                                                                                                                                                                                                                                                                                                                                                                                                                                                                                                                               |
| Gene_Symbol=RANBP5 127 kDa protein                                                                                                                                                                                                                                                                                                                                                                                                                                                                                                                                                                                                                                                                                                                                                                                                                                                                                                                                                                                                                                                                                                                                                                                                                                                                                                                                                                             |
| Gene_Symbol=RAP1A Ras-related protein Rap-1A precursor                                                                                                                                                                                                                                                                                                                                                                                                                                                                                                                                                                                                                                                                                                                                                                                                                                                                                                                                                                                                                                                                                                                                                                                                                                                                                                                                                         |
| Gene_Symbol=RBBP4 Histone-binding protein RBBP4                                                                                                                                                                                                                                                                                                                                                                                                                                                                                                                                                                                                                                                                                                                                                                                                                                                                                                                                                                                                                                                                                                                                                                                                                                                                                                                                                                |
| Gene_Symbol=RBBP7 Retinoblastoma binding protein 7                                                                                                                                                                                                                                                                                                                                                                                                                                                                                                                                                                                                                                                                                                                                                                                                                                                                                                                                                                                                                                                                                                                                                                                                                                                                                                                                                             |
| Gene_Symbol=RBM12B RNA binding motif protein 12B                                                                                                                                                                                                                                                                                                                                                                                                                                                                                                                                                                                                                                                                                                                                                                                                                                                                                                                                                                                                                                                                                                                                                                                                                                                                                                                                                               |
| Gene_Symbol=RBM22 Pre-mRNA-splicing factor RBM22                                                                                                                                                                                                                                                                                                                                                                                                                                                                                                                                                                                                                                                                                                                                                                                                                                                                                                                                                                                                                                                                                                                                                                                                                                                                                                                                                               |
| Gene_Symbol=RBM25 RNA binding motif protein 25                                                                                                                                                                                                                                                                                                                                                                                                                                                                                                                                                                                                                                                                                                                                                                                                                                                                                                                                                                                                                                                                                                                                                                                                                                                                                                                                                                 |
| Gene_Symbol=RBM8A Isoform 1 of RNA-binding protein 8A                                                                                                                                                                                                                                                                                                                                                                                                                                                                                                                                                                                                                                                                                                                                                                                                                                                                                                                                                                                                                                                                                                                                                                                                                                                                                                                                                          |
| Gene_Symbol=RBMXL1;CCBL2 RNA binding motif protein, X-linked-like 1                                                                                                                                                                                                                                                                                                                                                                                                                                                                                                                                                                                                                                                                                                                                                                                                                                                                                                                                                                                                                                                                                                                                                                                                                                                                                                                                            |
| Gene_Symbol=RCC1 regulator of chromosome condensation 1 isoform a                                                                                                                                                                                                                                                                                                                                                                                                                                                                                                                                                                                                                                                                                                                                                                                                                                                                                                                                                                                                                                                                                                                                                                                                                                                                                                                                              |
| Gene_Symbol=RCC2 Protein RCC2                                                                                                                                                                                                                                                                                                                                                                                                                                                                                                                                                                                                                                                                                                                                                                                                                                                                                                                                                                                                                                                                                                                                                                                                                                                                                                                                                                                  |
| Gene_Symbol=RFC1 Isoform 1 of Replication factor C subunit 1                                                                                                                                                                                                                                                                                                                                                                                                                                                                                                                                                                                                                                                                                                                                                                                                                                                                                                                                                                                                                                                                                                                                                                                                                                                                                                                                                   |
| Gene_Symbol=RHOA Transforming protein RhoA precursor                                                                                                                                                                                                                                                                                                                                                                                                                                                                                                                                                                                                                                                                                                                                                                                                                                                                                                                                                                                                                                                                                                                                                                                                                                                                                                                                                           |
| Gene_Symbol=RNASE4;ANG Angiogenin precursor                                                                                                                                                                                                                                                                                                                                                                                                                                                                                                                                                                                                                                                                                                                                                                                                                                                                                                                                                                                                                                                                                                                                                                                                                                                                                                                                                                    |
| Gene_Symbol=RNFB40 Isoform 1 of E3 ubiquitin-protein ligase BRE1B                                                                                                                                                                                                                                                                                                                                                                                                                                                                                                                                                                                                                                                                                                                                                                                                                                                                                                                                                                                                                                                                                                                                                                                                                                                                                                                                              |
| Gene_Symbol=RNH1 Ribonuclease inhibitor                                                                                                                                                                                                                                                                                                                                                                                                                                                                                                                                                                                                                                                                                                                                                                                                                                                                                                                                                                                                                                                                                                                                                                                                                                                                                                                                                                        |
| Gene_Symbol=RP6-166C19.3;RP6-166C19.5;RP6-166C19.4;RP6-166C19.1;CT47.8;RP6-166C19.6;RP6-166C19.10;RP6-166C19.11;RP6-166C19.12;RP6-166C19.13;RP6-166C19.14;RP6-166C19.15;RP6-166C19.16;RP6-166C19.17;RP6-166C19.18;RP6-166C19.19;RP6-166C19.20;RP6-166C19.21;RP6-166C19.22;RP6-166C19.23;RP6-166C19.24;RP6-166C19.25;RP6-166C19.26;RP6-166C19.27;RP6-166C19.28;RP6-166C19.29;RP6-166C19.30;RP6-166C19.31;RP6-166C19.32;RP6-166C19.33;RP6-166C19.34;RP6-166C19.35;RP6-166C19.36;RP6-166C19.37;RP6-166C19.38;RP6-166C19.39;RP6-166C19.40;RP6-166C19.41;RP6-166C19.42;RP6-166C19.43;RP6-166C19.44;RP6-166C19.45;RP6-166C19.46;RP6-166C19.47;RP6-166C19.48;RP6-166C19.49;RP6-166C19.50;RP6-166C19.51;RP6-166C19.52;RP6-166C19.53;RP6-166C19.54;RP6-166C19.55;RP6-166C19.56;RP6-166C19.57;RP6-166C19.58;RP6-166C19.59;RP6-166C19.60;RP6-166C19.61;RP6-166C19.62;RP6-166C19.63;RP6-166C19.64;RP6-166C19.65;RP6-166C19.66;RP6-166C19.67;RP6-166C19.68;RP6-166C19.69;RP6-166C19.70;RP6-166C19.71;RP6-166C19.72;RP6-166C19.73;RP6-166C19.74;RP6-166C19.75;RP6-166C19.76;RP6-166C19.77;RP6-166C19.78;RP6-166C19.79;RP6-166C19.80;RP6-166C19.81;RP6-166C19.82;RP6-166C19.83;RP6-166C19.84;RP6-166C19.85;RP6-166C19.86;RP6-166C19.87;RP6-166C19.88;RP6-166C19.89;RP6-166C19.90;RP6-166C19.91;RP6-166C19.92;RP6-166C19.93;RP6-166C19.94;RP6-166C19.95;RP6-166C19.96;RP6-166C19.97;RP6-166C19.98;RP6-166C19.99;RP6-166C19.100 |
| Gene_Symbol=RPA1 Replication protein A 70 kDa DNA-binding subunit                                                                                                                                                                                                                                                                                                                                                                                                                                                                                                                                                                                                                                                                                                                                                                                                                                                                                                                                                                                                                                                                                                                                                                                                                                                                                                                                              |
| Gene_Symbol=RPA2 Isoform 3 of Replication protein A 32 kDa subunit                                                                                                                                                                                                                                                                                                                                                                                                                                                                                                                                                                                                                                                                                                                                                                                                                                                                                                                                                                                                                                                                                                                                                                                                                                                                                                                                             |
| Gene_Symbol=RPA3 Replication protein A 14 kDa subunit                                                                                                                                                                                                                                                                                                                                                                                                                                                                                                                                                                                                                                                                                                                                                                                                                                                                                                                                                                                                                                                                                                                                                                                                                                                                                                                                                          |
| Gene_Symbol=RPL10A 60S ribosomal protein L10a                                                                                                                                                                                                                                                                                                                                                                                                                                                                                                                                                                                                                                                                                                                                                                                                                                                                                                                                                                                                                                                                                                                                                                                                                                                                                                                                                                  |
| Gene_Symbol=RPL11 Isoform 1 of 60S ribosomal protein L11                                                                                                                                                                                                                                                                                                                                                                                                                                                                                                                                                                                                                                                                                                                                                                                                                                                                                                                                                                                                                                                                                                                                                                                                                                                                                                                                                       |
| Gene_Symbol=RPL12 60S ribosomal protein L12                                                                                                                                                                                                                                                                                                                                                                                                                                                                                                                                                                                                                                                                                                                                                                                                                                                                                                                                                                                                                                                                                                                                                                                                                                                                                                                                                                    |
| Gene_Symbol=RPL14 RPL14 protein                                                                                                                                                                                                                                                                                                                                                                                                                                                                                                                                                                                                                                                                                                                                                                                                                                                                                                                                                                                                                                                                                                                                                                                                                                                                                                                                                                                |
| Gene_Symbol=RPL17 60S ribosomal protein L17                                                                                                                                                                                                                                                                                                                                                                                                                                                                                                                                                                                                                                                                                                                                                                                                                                                                                                                                                                                                                                                                                                                                                                                                                                                                                                                                                                    |
| Gene_Symbol=RPL18 60S ribosomal protein L18                                                                                                                                                                                                                                                                                                                                                                                                                                                                                                                                                                                                                                                                                                                                                                                                                                                                                                                                                                                                                                                                                                                                                                                                                                                                                                                                                                    |
| Gene_Symbol=RPL22 60S ribosomal protein L22                                                                                                                                                                                                                                                                                                                                                                                                                                                                                                                                                                                                                                                                                                                                                                                                                                                                                                                                                                                                                                                                                                                                                                                                                                                                                                                                                                    |
| Gene_Symbol=RPL23A 60S ribosomal protein L23a                                                                                                                                                                                                                                                                                                                                                                                                                                                                                                                                                                                                                                                                                                                                                                                                                                                                                                                                                                                                                                                                                                                                                                                                                                                                                                                                                                  |
| Gene_Symbol=RPL27 60S ribosomal protein L27                                                                                                                                                                                                                                                                                                                                                                                                                                                                                                                                                                                                                                                                                                                                                                                                                                                                                                                                                                                                                                                                                                                                                                                                                                                                                                                                                                    |
| Gene_Symbol=RPL30 60S ribosomal protein L30                                                                                                                                                                                                                                                                                                                                                                                                                                                                                                                                                                                                                                                                                                                                                                                                                                                                                                                                                                                                                                                                                                                                                                                                                                                                                                                                                                    |

|                                                                                        |
|----------------------------------------------------------------------------------------|
| Gene_Symbol=RPL38 60S ribosomal protein L38                                            |
| Gene_Symbol=RPL5 60S ribosomal protein L5                                              |
| Gene_Symbol=RPL8 60S ribosomal protein L8                                              |
| Gene_Symbol=RPLP0 60S acidic ribosomal protein P0                                      |
| Gene_Symbol=RPLP1;hCG_1641617 60S acidic ribosomal protein P1                          |
| Gene_Symbol=RPLP2 60S acidic ribosomal protein P2                                      |
| Gene_Symbol=RPS10 40S ribosomal protein S10                                            |
| Gene_Symbol=RPS13 40S ribosomal protein S13                                            |
| Gene_Symbol=RPS19 40S ribosomal protein S19                                            |
| Gene_Symbol=RPS2 40S ribosomal protein S2                                              |
| Gene_Symbol=RPS20 40S ribosomal protein S20                                            |
| Gene_Symbol=RPS21 40S ribosomal protein S21                                            |
| Gene_Symbol=RPS27A;UBC;UBB ubiquitin and ribosomal protein S27a precursor              |
| Gene_Symbol=RPS3 40S ribosomal protein S3                                              |
| Gene_Symbol=RPS4X 40S ribosomal protein S4, X isoform                                  |
| Gene_Symbol=RPS7 40S ribosomal protein S7                                              |
| Gene_Symbol=RPS8 40S ribosomal protein S8                                              |
| Gene_Symbol=RPSA;LOC388524 Ribosomal protein SA                                        |
| Gene_Symbol=RRBP1 Isoform 1 of Ribosome-binding protein 1                              |
| Gene_Symbol=RRBP1 Isoform 3 of Ribosome-binding protein 1                              |
| Gene_Symbol=RTBDN retbindin isoform 2                                                  |
| Gene_Symbol=RUVBL2 RuvB-like 2                                                         |
| Gene_Symbol=S100A11 Protein S100-A11                                                   |
| Gene_Symbol=SAE2 SUMO-activating enzyme subunit 2                                      |
| Gene_Symbol=SAFB Scaffold attachment factor B                                          |
| Gene_Symbol=SAFB2 Scaffold attachment factor B2                                        |
| Gene_Symbol=SART1 U4/U6.U5 tri-snRNP-associated protein 1                              |
| Gene_Symbol=SART3 Isoform 1 of Squamous cell carcinoma antigen recognized by T-cells 3 |
| Gene_Symbol=SCAMP3 Isoform 1 of Secretory carrier-associated membrane protein 3        |
| Gene_Symbol=SCG2 Secretogranin-2 precursor                                             |
| Gene_Symbol=SCG3 Secretogranin-3 precursor                                             |
| Gene_Symbol=SCG5 Isoform 1 of Neuroendocrine protein 7B2 precursor                     |
| Gene_Symbol=SCYE1 37 kDa protein                                                       |
| Gene_Symbol=SDCBP Syntenin-1                                                           |
| Gene_Symbol=SDF2 Stromal cell-derived factor 2 precursor                               |
| Gene_Symbol=SDF4 45 kDa calcium-binding protein precursor                              |
| Gene_Symbol=SDSL Serine dehydratase-like                                               |
| Gene_Symbol=SEC23B Protein transport protein Sec23B                                    |
| Gene_Symbol=SELENBP1 selenium binding protein 1                                        |
| Gene_Symbol=SEPHS1 Selenide, water dikinase 1                                          |
| Gene_Symbol=SEPT2 Septin-2                                                             |
| Gene_Symbol=SEPT7 Isoform 1 of Septin-7                                                |
| Gene_Symbol=SERBP1 Isoform 1 of Plasminogen activator inhibitor 1 RNA-binding protein  |
| Gene_Symbol=SERPINA1 Alpha-1-antitrypsin precursor                                     |
| Gene_Symbol=SERPINB1 Leukocyte elastase inhibitor                                      |
| Gene_Symbol=SERPINI1 Neuroserpin precursor                                             |
| Gene_Symbol=SET Isoform 2 of Protein SET                                               |
| Gene_Symbol=SEZ6L2 Seizure 6-like protein 2                                            |
| Gene_Symbol=SF1 Isoform 5 of Splicing factor 1                                         |
| Gene_Symbol=SF3A1 Splicing factor 3 subunit 1                                          |
| Gene_Symbol=SF3A2 SF3A2 protein (Fragment)                                             |
| Gene_Symbol=SF3A3 Splicing factor 3A subunit 3                                         |
| Gene_Symbol=SF3B1 Splicing factor 3B subunit 1                                         |
| Gene_Symbol=SF3B2 splicing factor 3B subunit 2                                         |
| Gene_Symbol=SF3B3 Isoform 1 of Splicing factor 3B subunit 3                            |
| Gene_Symbol=SF3B4 Splicing factor 3B subunit 4                                         |
| Gene_Symbol=SF3B5 Splicing factor 3B subunit 5                                         |
| Gene_Symbol=SNRN Isoform 1 of 14-3-3 protein sigma                                     |
| Gene_Symbol=SFPQ Isoform Long of Splicing factor, proline- and glutamine-rich          |
| Gene_Symbol=SFRS1 Isoform ASF-1 of Splicing factor, arginine/serine-rich 1             |
| Gene_Symbol=SFRS10 Isoform 1 of Arginine/serine-rich-splicing factor 10                |
| Gene_Symbol=SFRS3 Splicing factor, arginine/serine-rich 3                              |
| Gene_Symbol=SFRS7 Isoform 1 of Splicing factor, arginine/serine-rich 7                 |

|                                                                                                                                |
|--------------------------------------------------------------------------------------------------------------------------------|
| Gene_Symbol=SFRS9 Splicing factor, arginine/serine-rich 9                                                                      |
| Gene_Symbol=SHMT2 Serine hydroxymethyltransferase, mitochondrial precursor                                                     |
| Gene_Symbol=SIAHBP1 SIAHBP1 protein                                                                                            |
| Gene_Symbol=SIL1 Nucleotide exchange factor SIL1 precursor                                                                     |
| Gene_Symbol=SKIV2L2 Superkiller viralicidic activity 2-like 2                                                                  |
| Gene_Symbol=SKP1A Isoform 1 of S-phase kinase-associated protein 1A                                                            |
| Gene_Symbol=SLC25A13 Mitochondrial aspartate-glutamate carrier protein                                                         |
| Gene_Symbol=SLC3A2 4F2 cell-surface antigen heavy chain                                                                        |
| Gene_Symbol=SMARCA5 SWI/SNF-related matrix-associated actin-dependent regulator of chromatin subfamily A member 5              |
| Gene_Symbol=SMARCC1 SWI/SNF related, matrix associated, actin dependent regulator of chromatin, subfamily c, member 1          |
| Gene_Symbol=SMARCC2 Isoform 2 of SWI/SNF-related matrix-associated actin-dependent regulator of chromatin subfamily C member 2 |
| Gene_Symbol=SMARCE1 Protein                                                                                                    |
| Gene_Symbol=SMC1A Structural maintenance of chromosomes protein 1A                                                             |
| Gene_Symbol=SMC3 Structural maintenance of chromosomes protein 3                                                               |
| Gene_Symbol=SMOC1 Isoform 2 of SPARC-related modular calcium-binding protein 1 precursor                                       |
| Gene_Symbol=SMOC2 Isoform 2 of SPARC-related modular calcium-binding protein 2 precursor                                       |
| Gene_Symbol=SND1 Staphylococcal nuclease domain-containing protein 1                                                           |
| Gene_Symbol=SNRP70 Isoform 2 of U1 small nuclear ribonucleoprotein 70 kDa                                                      |
| Gene_Symbol=SNRPB Isoform SM-B' of Small nuclear ribonucleoprotein-associated proteins B and B'                                |
| Gene_Symbol=SNRPB2 U2 small nuclear ribonucleoprotein B''                                                                      |
| Gene_Symbol=SNRPD1 Small nuclear ribonucleoprotein Sm D1                                                                       |
| Gene_Symbol=SNRPD2 Small nuclear ribonucleoprotein Sm D2                                                                       |
| Gene_Symbol=SNRPD3 Small nuclear ribonucleoprotein Sm D3                                                                       |
| Gene_Symbol=SNRPE Small nuclear ribonucleoprotein E                                                                            |
| Gene_Symbol=SNRPG Small nuclear ribonucleoprotein G                                                                            |
| Gene_Symbol=SNW1 SNW domain-containing protein 1                                                                               |
| Gene_Symbol=SOD1 16 kDa protein                                                                                                |
| Gene_Symbol=SOD2 Superoxide dismutase [Mn], mitochondrial precursor                                                            |
| Gene_Symbol=SON Isoform J of SON protein                                                                                       |
| Gene_Symbol=SORT1 Sortilin precursor                                                                                           |
| Gene_Symbol=SPINT1 Isoform 1 of Kunitz-type protease inhibitor 1 precursor                                                     |
| Gene_Symbol=SPP1 Isoform A of Osteopontin precursor                                                                            |
| Gene_Symbol=SPTAN1 Isoform 1 of Spectrin alpha chain, brain                                                                    |
| Gene_Symbol=SPTBN1 Isoform Long of Spectrin beta chain, brain 1                                                                |
| Gene_Symbol=SQSTM1 Isoform 1 of Sequestosome-1                                                                                 |
| Gene_Symbol=SR140 Isoform 1 of U2-associated protein SR140                                                                     |
| Gene_Symbol=SRP54 Signal recognition particle 54 kDa protein                                                                   |
| Gene_Symbol=SRP9;hCG_1781062 Signal recognition particle 9 kDa protein                                                         |
| Gene_Symbol=SRXN1;SCRT2 Sulfiredoxin-1                                                                                         |
| Gene_Symbol=SSB Lupus La protein                                                                                               |
| Gene_Symbol=SSRP1 FACT complex subunit SSRP1                                                                                   |
| Gene_Symbol=ST13 Hsc70-interacting protein                                                                                     |
| Gene_Symbol=ST14 Suppressor of tumorigenicity protein 14                                                                       |
| Gene_Symbol=STIP1 Stress-induced-phosphoprotein 1                                                                              |
| Gene_Symbol=STMN1 Stathmin                                                                                                     |
| Gene_Symbol=STXBP2 Syntaxin-binding protein 2                                                                                  |
| Gene_Symbol=SUB1 Activated RNA polymerase II transcriptional coactivator p15                                                   |
| Gene_Symbol=SUMF2 Isoform 3 of Sulfatase-modifying factor 2 precursor                                                          |
| Gene_Symbol=SUPT16H FACT complex subunit SPT16                                                                                 |
| Gene_Symbol=SUPT6H 199 kDa protein                                                                                             |
| Gene_Symbol=SYNCRIP Isoform 1 of Heterogeneous nuclear ribonucleoprotein Q                                                     |
| Gene_Symbol=SYNE2 Isoform 1 of Nesprin-2                                                                                       |
| Gene_Symbol=TACC2 Transforming, acidic coiled-coil containing protein 2                                                        |
| Gene_Symbol=TACSTD1 Tumor-associated calcium signal transducer 1 precursor                                                     |
| Gene_Symbol=TAGLN2;CCDC19 Transgelin-2                                                                                         |
| Gene_Symbol=TALDO1 Transaldolase                                                                                               |
| Gene_Symbol=TARDBP TAR DNA-binding protein 43                                                                                  |
| Gene_Symbol=TARS Threonyl-tRNA synthetase, cytoplasmic                                                                         |
| Gene_Symbol=TBCA Tubulin-specific chaperone A                                                                                  |
| Gene_Symbol=TCERG1 Transcription elongation regulator 1                                                                        |
| Gene_Symbol=TCN2 Transcobalamin-2 precursor                                                                                    |
| Gene_Symbol=TCP1 T-complex protein 1 subunit alpha                                                                             |
| Gene_Symbol=TFG Protein TFG                                                                                                    |

|                                                                                       |
|---------------------------------------------------------------------------------------|
| Gene_Symbol=TFPI Isoform Alpha of Tissue factor pathway inhibitor precursor           |
| Gene_Symbol=TFRC Transferrin receptor protein 1                                       |
| Gene_Symbol=THOC4 THO complex subunit 4                                               |
| Gene_Symbol=THRAP3 Thyroid hormone receptor-associated protein 3                      |
| Gene_Symbol=TIAL1 Nucleolysin TIAR                                                    |
| Gene_Symbol=TIMP1 Metalloproteinase inhibitor 1 precursor                             |
| Gene_Symbol=TIMP2 Metalloproteinase inhibitor 2 precursor                             |
| Gene_Symbol=TKT Transketolase                                                         |
| Gene_Symbol=TLN1 271 kDa protein                                                      |
| Gene_Symbol=TMEM137;RBM14 Isoform 1 of RNA-binding protein 14                         |
| Gene_Symbol=TMEM4 Isoform 1 of MIR-interacting saposin-like protein precursor         |
| Gene_Symbol=TMOD3 Tropomodulin-3                                                      |
| Gene_Symbol=TMPO Isoform Beta of Lamina-associated polypeptide 2, isoforms beta/gamma |
| Gene_Symbol=TNFRSF11B Tumor necrosis factor receptor superfamily member 11B precursor |
| Gene_Symbol=TNPO1 Transportin 1 (Importin beta)-2                                     |
| Gene_Symbol=TOMM70A Mitochondrial precursor proteins import receptor                  |
| Gene_Symbol=TOP1 DNA topoisomerase 1                                                  |
| Gene_Symbol=TOP2A 183 kDa protein                                                     |
| Gene_Symbol=TOR1B Torsin B precursor                                                  |
| Gene_Symbol=TPD52 Tumor protein D52                                                   |
| Gene_Symbol=TPI1 Triosephosphate isomerase 1 variant                                  |
| Gene_Symbol=TPM3 29 kDa protein                                                       |
| Gene_Symbol=PPP1 Isoform 1 of Tripeptidyl-peptidase 1 precursor                       |
| Gene_Symbol=PPP2 Tripeptidyl peptidase II                                             |
| Gene_Symbol=TPR Nucleoprotein TPR                                                     |
| Gene_Symbol=TRIM28 Isoform 1 of Transcription intermediary factor 1-beta              |
| Gene_Symbol=TRIM72 Isoform 1 of Tripartite motif-containing protein 72                |
| Gene_Symbol=TRIP11 Thyroid receptor-interacting protein 11                            |
| Gene_Symbol=TROVE2 Isoform Long of 60 kDa SS-A/Ro ribonucleoprotein                   |
| Gene_Symbol=TSN Translin                                                              |
| Gene_Symbol=TUBA1B Tubulin alpha-ubiquitous chain                                     |
| Gene_Symbol=TUBA1C Tubulin alpha-6 chain                                              |
| Gene_Symbol=TUBB Tubulin beta chain                                                   |
| Gene_Symbol=TUBB2A Tubulin beta-2A chain                                              |
| Gene_Symbol=TUBB2C Tubulin beta-2C chain                                              |
| Gene_Symbol=TWF1 twinfilin 1                                                          |
| Gene_Symbol=TWF2 Twinfilin-2                                                          |
| Gene_Symbol=TXN Thioredoxin                                                           |
| Gene_Symbol=TXNDC12 Thioredoxin domain-containing protein 12 precursor                |
| Gene_Symbol=TXNDC4 Thioredoxin domain-containing protein 4 precursor                  |
| Gene_Symbol=TXNDC5;MUTED thioredoxin domain containing 5 isoform 2                    |
| Gene_Symbol=TXNL1 Thioredoxin-like protein 1                                          |
| Gene_Symbol=TXNL2 Thioredoxin-like protein 2                                          |
| Gene_Symbol=U2AF1 Splicing factor U2AF 35 kDa subunit                                 |
| Gene_Symbol=U2AF2 Splicing factor U2AF 65 kDa subunit                                 |
| Gene_Symbol=UBAP2L Isoform 3 of Ubiquitin-associated protein 2-like                   |
| Gene_Symbol=UBE1 Ubiquitin-activating enzyme E1                                       |
| Gene_Symbol=UBE1C NEDD8-activating enzyme E1 catalytic subunit                        |
| Gene_Symbol=UBE2I SUMO-conjugating enzyme UBC9                                        |
| Gene_Symbol=UBE2L3 Ubiquitin-conjugating enzyme E2 L3                                 |
| Gene_Symbol=UBE2N Ubiquitin-conjugating enzyme E2 N                                   |
| Gene_Symbol=UBE2V1;Kua-UEV Isoform 1 of Ubiquitin-conjugating enzyme E2 variant 1     |
| Gene_Symbol=UBQLN4 Ubiquilin-4                                                        |
| Gene_Symbol=UCHL1 Ubiquitin carboxyl-terminal hydrolase isozyme L1                    |
| Gene_Symbol=UCHL5 Isoform 2 of Ubiquitin carboxyl-terminal hydrolase isozyme L5       |
| Gene_Symbol=UFC1 Ufm1-conjugating enzyme 1                                            |
| Gene_Symbol=UGCG1.1 UDP-glucose:glycoprotein glucosyltransferase 1 precursor          |
| Gene_Symbol=UGDH UDP-glucose 6-dehydrogenase                                          |
| Gene_Symbol=UGP1 UTP--glucose-1-phosphate uridylyltransferase 1                       |
| Gene_Symbol=UNQ2541 MSFL2541                                                          |
| Gene_Symbol=USP14 Ubiquitin carboxyl-terminal hydrolase 14                            |
| Gene_Symbol=USP15 Isoform 1 of Ubiquitin carboxyl-terminal hydrolase 15               |
| Gene_Symbol=USP5 Isoform Long of Ubiquitin carboxyl-terminal hydrolase 5              |

|                                                                           |
|---------------------------------------------------------------------------|
| Gene_Symbol=USP7 Ubiquitin carboxyl-terminal hydrolase 7                  |
| Gene_Symbol=VAPA Vesicle-associated membrane protein-associated protein A |
| Gene_Symbol=VAR5 Valyl-tRNA synthetase                                    |
| Gene_Symbol=VAT1 Synaptic vesicle membrane protein VAT-1 homolog          |
| Gene_Symbol=VCL Isoform 1 of Vinculin                                     |
| Gene_Symbol=VCP Transitional endoplasmic reticulum ATPase                 |
| Gene_Symbol=VGF VGF nerve growth factor inducible precursor               |
| Gene_Symbol=VIL1 Villin-1                                                 |
| Gene_Symbol=VISA Isoform 1 of Mitochondrial antiviral-signaling protein   |
| Gene_Symbol=VPS35 Vacuolar protein sorting-associated protein 35          |
| Gene_Symbol=WARS tryptophanyl-tRNA synthetase isoform b                   |
| Gene_Symbol=WDR1 Isoform 2 of WD repeat protein 1                         |
| Gene_Symbol=XPO1 Exportin-1                                               |
| Gene_Symbol=XRCC5 ATP-dependent DNA helicase 2 subunit 2                  |
| Gene_Symbol=XRCC6 70 kDa protein                                          |
| Gene_Symbol=YBX1 Nuclease sensitive element-binding protein 1             |
| Gene_Symbol=YWHAB Isoform Long of 14-3-3 protein beta/alpha               |
| Gene_Symbol=YWHAE 14-3-3 protein epsilon                                  |
| Gene_Symbol=YWHAG 14-3-3 protein gamma                                    |
| Gene_Symbol=YWHAQ 14-3-3 protein theta                                    |
| Gene_Symbol=YWHAZ 14-3-3 protein zeta/delta                               |
| Gene_Symbol=ZFR 117 kDa protein                                           |
| Gene_Symbol=ZNF207 Isoform 3 of Zinc finger protein 207                   |



CM of the 3 replicates (Rep1-3) of H1688 from Mascot and X! Tan

| Number of s | Accession numbers                               | Protein molecular weight (AMU) | H1688-Rep1 (CCL257-S1) |
|-------------|-------------------------------------------------|--------------------------------|------------------------|
| 1           | IPI00797738                                     | 12017.4                        | 100%                   |
| 1           | IPI00795717                                     | 19044.7                        | 70%                    |
| 1           | IPI00478011                                     | 21412.7                        | 70%                    |
| 1           | IPI00647593                                     | 23284.1                        | 0                      |
| 1           | IPI00472119                                     | 29953.5                        | 70%                    |
| 1           | IPI00795769                                     | 51765.4                        | 70%                    |
| 1           | IPI00783641                                     | 71135.5                        | 100%                   |
| 1           | IPI00785057                                     | 48889.5                        | 0                      |
| 1           | IPI00384863                                     | 12523.4                        | 100%                   |
| 1           | IPI00382617                                     | 31463.9                        | 100%                   |
| 1           | IPI00789847                                     | 90085.6                        | 100%                   |
| 1           | IPI00169276                                     | 26521.2                        | 0                      |
| 1           | IPI00784131                                     | 106694.8                       | 70%                    |
| 3           | IPI00013495,IPI00302146,IPI00792186             | 91664.6                        | 0                      |
| 1           | IPI00063827                                     | 22328                          | 100%                   |
| 2           | IPI00020982,IPI00219832                         | 85323.9                        | 99%                    |
| 1           | IPI00440499                                     | 30966.6                        | 0                      |
| 1           | IPI00009315                                     | 60574.7                        | 0                      |
| 1           | IPI00437751                                     | 149700.9                       | 100%                   |
| 1           | IPI00007334                                     | 151869.9                       | 70%                    |
| 2           | IPI00021290,IPI00394838                         | 120824.8                       | 70%                    |
| 3           | IPI00219451,IPI00395469,IPI00413603             | 27022.1                        | 0                      |
| 1           | IPI00419240                                     | 36581.5                        | 100%                   |
| 2           | IPI00021428,IPI00023006                         | 42034.1                        | 100%                   |
| 2           | IPI00021439,IPI00021440                         | 41719.8                        | 100%                   |
| 1           | IPI00759776                                     | 105554.2                       | 100%                   |
| 1           | IPI00013808                                     | 104839.2                       | 100%                   |
| 1           | IPI00028091                                     | 47353.8                        | 100%                   |
| 1           | IPI00013897                                     | 84125                          | 100%                   |
| 1           | IPI00420069                                     | 90365.2                        | 100%                   |
| 2           | IPI00029606,IPI00288894                         | 78525.4                        | 0                      |
| 2           | IPI00440932,IPI00747759                         | 90538.1                        | 100%                   |
| 1           | IPI00790458                                     | 116265.1                       | 0                      |
| 3           | IPI00025057,IPI00025058,IPI00394665             | 133188.5                       | 0                      |
| 1           | IPI00394668                                     | 140751.9                       | 100%                   |
| 1           | IPI00000027                                     | 18818.2                        | 100%                   |
| 1           | IPI00032220                                     | 53136.8                        | 100%                   |
| 1           | IPI00012007                                     | 47699.1                        | 100%                   |
| 1           | IPI00030706                                     | 38256.4                        | 99%                    |
| 2           | IPI00000690,IPI00157908                         | 66883.5                        | 100%                   |
| 2           | IPI00215901,IPI00218988                         | 26461                          | 100%                   |
| 1           | IPI00220271                                     | 36555.6                        | 100%                   |
| 2           | IPI00413641,IPI00556258                         | 35835.9                        | 100%                   |
| 1           | IPI00105407                                     | 36003.4                        | 100%                   |
| 1           | IPI00029733                                     | 36771.1                        | 100%                   |
| 1           | IPI00291483                                     | 36827.1                        | 100%                   |
| 1           | IPI00305978                                     | 39571                          | 0                      |
| 1           | IPI00293721                                     | 37188.8                        | 70%                    |
| 4           | IPI00015102,IPI00783803,IPI00795504,IPI00795505 | 65085.8                        | 70%                    |
| 1           | IPI00218914                                     | 54844.8                        | 100%                   |
| 2           | IPI00333619,IPI00394758                         | 54831.8                        | 0                      |
| 1           | IPI00479877                                     | 56274.4                        | 0                      |
| 1           | IPI00465439                                     | 39402.6                        | 100%                   |
| 1           | IPI00418262                                     | 39438.2                        | 100%                   |
| 1           | IPI00022426                                     | 38981.6                        | 100%                   |
| 2           | IPI00025849,IPI00449263                         | 28568.1                        | 100%                   |
| 2           | IPI00007423,IPI00759824                         | 28770.6                        | 70%                    |
| 2           | IPI00165393,IPI00640833                         | 30675.3                        | 100%                   |
| 1           | IPI00329801                                     | 35920.6                        | 100%                   |
| 3           | IPI00411453,IPI00477622,IPI00719680             | 130458.5                       | 0                      |

|   |                                        |          |      |
|---|----------------------------------------|----------|------|
| 2 | IPI00337741,IPI00794973                | 81206.1  | 0    |
| 1 | IPI00215911                            | 35537.7  | 100% |
| 3 | IPI00006684,IPI00554742,IPI00555572    | 58455.7  | 70%  |
| 2 | IPI00031030,IPI00220978                | 86937    | 0    |
| 1 | IPI00168479                            | 31657.4  | 100% |
| 4 | IPI00006608,IPI00219187,IPI00412681,IF | 86923.3  | 100% |
| 1 | IPI00514053                            | 57193.2  | 0    |
| 1 | IPI00215914                            | 20679.6  | 100% |
| 1 | IPI00216520                            | 38581.8  | 0    |
| 1 | IPI00796541                            | 25813.2  | 100% |
| 1 | IPI00328748                            | 26886.4  | 100% |
| 2 | IPI00329685,IPI00744184                | 53789.5  | 0    |
| 2 | IPI00165949,IPI00477831                | 107826.4 | 99%  |
| 1 | IPI00420014                            | 244495.8 | 70%  |
| 5 | IPI00024572,IPI00032450,IPI00294834,IF | 25585    | 0    |
| 1 | IPI00555734                            | 32066.1  | 70%  |
| 1 | IPI00020632                            | 50800.3  | 100% |
| 1 | IPI00289499                            | 64598.5  | 100% |
| 1 | IPI00747443                            | 114723.8 | 0    |
| 1 | IPI00440493                            | 59734.1  | 100% |
| 1 | IPI00303476                            | 56542.5  | 100% |
| 2 | IPI00002521,IPI00456008                | 12569.9  | 100% |
| 3 | IPI00020430,IPI00784119,IPI00794988    | 52592.9  | 100% |
| 2 | IPI00168884,IPI00828107                | 26615.3  | 70%  |
| 1 | IPI00007682                            | 68287.4  | 0    |
| 1 | IPI00641829                            | 50662.1  | 100% |
| 2 | IPI00027235,IPI00478671                | 158518.3 | 0    |
| 1 | IPI00166729                            | 34240.6  | 70%  |
| 2 | IPI00004656,IPI00796379                | 13696.9  | 100% |
| 1 | IPI00064848                            | 37120.7  | 0    |
| 2 | IPI00304331,IPI00477470                | 37103.8  | 70%  |
| 1 | IPI00009997                            | 47101.4  | 0    |
| 1 | IPI00746600                            | 43939.7  | 100% |
| 1 | IPI00000643                            | 23754.5  | 70%  |
| 1 | IPI00026087                            | 10040.7  | 99%  |
| 2 | IPI00010700,IPI00642817                | 228845.1 | 100% |
| 3 | IPI00006079,IPI00413671,IPI00413672    | 106107.3 | 100% |
| 1 | IPI00301434                            | 16914.1  | 100% |
| 1 | IPI00410214                            | 33374.7  | 0    |
| 1 | IPI00013468                            | 37136.7  | 100% |
| 1 | IPI00003419                            | 20314.7  | 100% |
| 1 | IPI00064212                            | 89082.9  | 0    |
| 1 | IPI00292150                            | 195038.5 | 70%  |
| 1 | IPI00009922                            | 12331    | 100% |
| 2 | IPI00006980,IPI00792100                | 28051.3  | 100% |
| 1 | IPI00056357                            | 18776.9  | 0    |
| 1 | IPI00014230                            | 31344.6  | 100% |
| 1 | IPI00005918                            | 43817.1  | 70%  |
| 5 | IPI00024913,IPI00218482,IPI00784162,IF | 28151.6  | 100% |
| 1 | IPI00550689                            | 55192.2  | 0    |
| 1 | IPI00152148                            | 64656.5  | 100% |
| 1 | IPI00816741                            | 123335.5 | 0    |
| 2 | IPI00007926,IPI00395835                | 19090.3  | 70%  |
| 3 | IPI00395627,IPI00552308,IPI00745851    | 26192.3  | 100% |
| 1 | IPI00000914                            | 15449.8  | 100% |
| 3 | IPI00075248,IPI00386621,IPI00794543    | 16820    | 100% |
| 1 | IPI00020599                            | 48124.9  | 100% |
| 3 | IPI00014537,IPI00045396,IPI00789155    | 37089.6  | 0    |
| 7 | IPI00172636,IPI00430291,IPI00827573,IF | 54111.1  | 0    |
| 1 | IPI00100160                            | 136363.1 | 100% |
| 1 | IPI00103175                            | 44822.1  | 100% |
| 1 | IPI00020984                            | 67552.2  | 100% |
| 1 | IPI00008274                            | 51837.5  | 0    |

|   |                                                 |          |      |
|---|-------------------------------------------------|----------|------|
| 1 | IPI00005969                                     | 32905.1  | 100% |
| 1 | IPI00026182                                     | 32931.2  | 0    |
| 3 | IPI00026185,IPI00218782,IPI00642256             | 31333.6  | 100% |
| 1 | IPI00304409                                     | 15873.6  | 100% |
| 1 | IPI00027443                                     | 94622.2  | 100% |
| 1 | IPI00295386                                     | 30356.8  | 100% |
| 1 | IPI00010320                                     | 21400.1  | 70%  |
| 1 | IPI00297579                                     | 20794    | 100% |
| 1 | IPI00024662                                     | 22207.6  | 100% |
| 1 | IPI00217357                                     | 132805.7 | 0    |
| 1 | IPI00797903                                     | 23884.9  | 0    |
| 1 | IPI00297779                                     | 57471.9  | 100% |
| 4 | IPI00290770,IPI00552715,IPI00553185,IPI00553186 | 60446.3  | 70%  |
| 1 | IPI00302927                                     | 57908    | 100% |
| 1 | IPI00010720                                     | 59654.3  | 100% |
| 1 | IPI00027626                                     | 58007.3  | 100% |
| 1 | IPI00018465                                     | 59349.8  | 0    |
| 2 | IPI00302925,IPI00784090                         | 59761.2  | 0    |
| 3 | IPI00215997,IPI00657796,IPI00795937             | 25399    | 0    |
| 1 | IPI00007189                                     | 21292.7  | 0    |
| 1 | IPI00465294                                     | 92236.2  | 70%  |
| 1 | IPI00025861                                     | 97439.6  | 100% |
| 1 | IPI00290089                                     | 92132.4  | 100% |
| 1 | IPI00290085                                     | 99793.8  | 100% |
| 1 | IPI00027486                                     | 76777.9  | 100% |
| 1 | IPI00099670                                     | 79649.6  | 100% |
| 1 | IPI00012011                                     | 18485.2  | 100% |
| 1 | IPI00333010                                     | 103684.7 | 99%  |
| 1 | IPI00746813                                     | 50670.1  | 100% |
| 1 | IPI00006601                                     | 78228.1  | 100% |
| 2 | IPI00301185,IPI00306719                         | 47597.8  | 70%  |
| 1 | IPI00099831                                     | 41537.6  | 100% |
| 1 | IPI00641579                                     | 31900.4  | 100% |
| 1 | IPI00022977                                     | 42627.1  | 100% |
| 1 | IPI00658109                                     | 47020    | 100% |
| 1 | IPI00010896                                     | 26905.3  | 100% |
| 2 | IPI00291930,IPI00397519                         | 68242.5  | 99%  |
| 1 | IPI00007257                                     | 108623.5 | 0    |
| 1 | IPI00005491                                     | 107001.7 | 100% |
| 2 | IPI00396423,IPI00747063                         | 107015.6 | 100% |
| 1 | IPI00455383                                     | 187876.8 | 100% |
| 3 | IPI00291262,IPI00400826,IPI00795633             | 52477    | 100% |
| 1 | IPI00219953                                     | 25837.9  | 100% |
| 1 | IPI00430812                                     | 19573.2  | 0    |
| 1 | IPI00165579                                     | 43816.2  | 70%  |
| 2 | IPI00012386,IPI00791735                         | 59465.3  | 100% |
| 1 | IPI00295857                                     | 138317.2 | 0    |
| 1 | IPI00295851                                     | 107128   | 100% |
| 1 | IPI00220219                                     | 102471.1 | 70%  |
| 1 | IPI00399318                                     | 28779.5  | 0    |
| 2 | IPI00001890,IPI00783982                         | 98370.2  | 100% |
| 1 | IPI00007058                                     | 54216.9  | 100% |
| 1 | IPI00008453                                     | 53232.3  | 100% |
| 1 | IPI00017704                                     | 15927.2  | 0    |
| 1 | IPI00025086                                     | 16756.6  | 100% |
| 1 | IPI00027078                                     | 152915.4 | 70%  |
| 1 | IPI00031121                                     | 63657.9  | 100% |
| 1 | IPI00550308                                     | 97378.8  | 70%  |
| 1 | IPI00026219                                     | 160867.8 | 0    |
| 1 | IPI00419531                                     | 88471.5  | 0    |
| 1 | IPI00021997                                     | 24057    | 98%  |
| 1 | IPI00006034                                     | 22474.5  | 70%  |
| 2 | IPI00305469,IPI00399054                         | 22887.9  | 91%  |

|    |                                        |          |      |
|----|----------------------------------------|----------|------|
| 1  | IPI00004839                            | 33759.3  | 100% |
| 3  | IPI00000792,IPI00641565,IPI00647366    | 35189.3  | 100% |
| 1  | IPI00025366                            | 51695.7  | 100% |
| 1  | IPI00741317                            | 45263.8  | 0    |
| 1  | IPI00442073                            | 20549.1  | 100% |
| 1  | IPI00021828                            | 11121.3  | 100% |
| 2  | IPI00011528,IPI00644499                | 48340.5  | 0    |
| 2  | IPI00013256,IPI00607841                | 60941.1  | 0    |
| 2  | IPI00006122,IPI00515009                | 90939.4  | 0    |
| 1  | IPI00060423                            | 26206.8  | 100% |
| 1  | IPI00215948                            | 100054.9 | 70%  |
| 1  | IPI00017292                            | 85479    | 100% |
| 24 | IPI00182469,IPI00182540,IPI00219725,IF | 107333   | 70%  |
| 1  | IPI00640525                            | 56216.5  | 100% |
| 1  | IPI00022810                            | 51824.3  | 100% |
| 1  | IPI00011229                            | 44535    | 100% |
| 1  | IPI00029601                            | 61743.7  | 70%  |
| 3  | IPI00034319,IPI00554556,IPI00554634    | 19098.1  | 100% |
| 1  | IPI00303954                            | 16676.8  | 0    |
| 1  | IPI00465315                            | 11731.4  | 100% |
| 2  | IPI00644231,IPI00791837                | 145168.7 | 0    |
| 1  | IPI00028911                            | 97563.3  | 100% |
| 2  | IPI00165230,IPI00335930                | 43365    | 100% |
| 3  | IPI00010182,IPI00218836,IPI00815745    | 10026.8  | 100% |
| 2  | IPI00003406,IPI00295624                | 71406.5  | 100% |
| 1  | IPI00300567                            | 32798.5  | 70%  |
| 1  | IPI00220342                            | 31103.8  | 100% |
| 3  | IPI00293464,IPI00784120,IPI00786914    | 126952.2 | 100% |
| 1  | IPI00025394                            | 53877.2  | 100% |
| 3  | IPI00001477,IPI00219996,IPI00657861    | 101111.7 | 70%  |
| 1  | IPI00293867                            | 12694.2  | 100% |
| 1  | IPI00293655                            | 82415.2  | 70%  |
| 2  | IPI00023785,IPI00651677                | 72354.9  | 0    |
| 1  | IPI00651653                            | 72540.2  | 100% |
| 1  | IPI00015953                            | 87328    | 100% |
| 1  | IPI00829889                            | 90051.5  | 0    |
| 1  | IPI00329791                            | 117348.1 | 0    |
| 1  | IPI00017617                            | 69131.7  | 100% |
| 1  | IPI00003482                            | 36050.9  | 0    |
| 1  | IPI00020021                            | 42657.9  | 100% |
| 1  | IPI00396435                            | 92813.4  | 70%  |
| 1  | IPI00742905                            | 146459   | 100% |
| 1  | IPI00619921                            | 243855.9 | 70%  |
| 1  | IPI00221394                            | 57657.2  | 14%  |
| 1  | IPI00398918                            | 50809.8  | 70%  |
| 1  | IPI00015911                            | 54132.4  | 0    |
| 7  | IPI00030351,IPI00218729,IPI00552213,IF | 100338.4 | 70%  |
| 1  | IPI00015947                            | 38027.6  | 70%  |
| 1  | IPI00008454                            | 40496.6  | 100% |
| 1  | IPI00293260                            | 91055.4  | 0    |
| 1  | IPI00006713                            | 57564.2  | 0    |
| 1  | IPI00003438                            | 29824.2  | 100% |
| 1  | IPI00010348                            | 39563    | 0    |
| 1  | IPI00037283                            | 79093.2  | 0    |
| 7  | IPI00033022,IPI00181352,IPI00218889,IF | 98049.9  | 0    |
| 2  | IPI00025846,IPI00220146                | 99944.6  | 70%  |
| 1  | IPI00028931                            | 122276.4 | 100% |
| 1  | IPI00013933                            | 331763.4 | 100% |
| 1  | IPI00473014                            | 18488.2  | 70%  |
| 1  | IPI00477531                            | 532346.6 | 100% |
| 1  | IPI00827859                            | 71309.7  | 66%  |
| 1  | IPI00019329                            | 10348.1  | 0    |
| 1  | IPI00024993                            | 31370.2  | 0    |

|   |                                        |          |      |
|---|----------------------------------------|----------|------|
| 2 | IPI00003351,IPI00645849                | 60655.4  | 100% |
| 2 | IPI00396485,IPI00472724                | 50123.2  | 100% |
| 1 | IPI00178440                            | 24746.2  | 100% |
| 1 | IPI00064086                            | 28539.9  | 100% |
| 1 | IPI00642971                            | 71390.3  | 0    |
| 1 | IPI00003588                            | 19793.1  | 70%  |
| 2 | IPI00000875,IPI00747497                | 50101.4  | 100% |
| 1 | IPI00186290                            | 95322.1  | 100% |
| 1 | IPI00003519                            | 109420.1 | 98%  |
| 2 | IPI00021728,IPI00793912                | 38371.7  | 0    |
| 1 | IPI00033143                            | 25042.4  | 0    |
| 1 | IPI00012795                            | 36484    | 100% |
| 1 | IPI00647650                            | 41563.7  | 0    |
| 1 | IPI00290460                            | 35594    | 16%  |
| 1 | IPI00013068                            | 52204.6  | 70%  |
| 1 | IPI00465233                            | 70886.5  | 100% |
| 2 | IPI00016910,IPI00646839                | 105329.2 | 70%  |
| 1 | IPI00747447                            | 99084.7  | 70%  |
| 1 | IPI00025491                            | 46137.3  | 100% |
| 2 | IPI00328328,IPI00409717                | 46385.6  | 70%  |
| 1 | IPI00027485                            | 25079.6  | 0    |
| 7 | IPI00220365,IPI00384463,IPI00386533,IF | 178140.1 | 99%  |
| 1 | IPI00015952                            | 102348.8 | 0    |
| 2 | IPI00376005,IPI00411704                | 20152.9  | 100% |
| 1 | IPI00299254                            | 138786.3 | 70%  |
| 1 | IPI00301936                            | 36074.6  | 100% |
| 1 | IPI00001466                            | 108886.2 | 0    |
| 1 | IPI00374054                            | 63906.9  | 0    |
| 1 | IPI00465248                            | 47152.2  | 100% |
| 1 | IPI00216171                            | 47251.7  | 0    |
| 2 | IPI00038378,IPI00385140                | 28914.4  | 0    |
| 1 | IPI00470835                            | 15516.3  | 0    |
| 5 | IPI00025295,IPI00478478,IPI00514953,IF | 53230.1  | 70%  |
| 1 | IPI00009896                            | 52933.1  | 0    |
| 1 | IPI00013452                            | 170575.2 | 100% |
| 1 | IPI00029631                            | 12241.3  | 70%  |
| 1 | IPI00386755                            | 54376.7  | 70%  |
| 1 | IPI00024911                            | 28976.9  | 100% |
| 1 | IPI00411706                            | 31445.6  | 0    |
| 2 | IPI00009841,IPI00065554                | 68947.8  | 100% |
| 2 | IPI00019576,IPI00797559                | 54714.1  | 70%  |
| 2 | IPI00607735,IPI00644969                | 14930.7  | 100% |
| 3 | IPI00001754,IPI00069985,IPI00294993    | 32565.1  | 100% |
| 1 | IPI00022937                            | 252295.2 | 100% |
| 1 | IPI00790820                            | 28265.3  | 70%  |
| 2 | IPI00021923,IPI00334282                | 24662.9  | 100% |
| 2 | IPI00303318,IPI00789253                | 36730.7  | 100% |
| 1 | IPI00031820                            | 57546.5  | 99%  |
| 1 | IPI00300074                            | 66114.6  | 0    |
| 1 | IPI00645907                            | 273409.1 | 0    |
| 1 | IPI00025039                            | 33766.1  | 100% |
| 2 | IPI00101405,IPI00797614                | 48258.8  | 100% |
| 1 | IPI00026215                            | 42576.2  | 100% |
| 2 | IPI00296053,IPI00759715                | 54619.8  | 70%  |
| 2 | IPI00396967,IPI00743342                | 44159    | 0    |
| 4 | IPI00008449,IPI00395337,IPI00657863,IF | 58358.1  | 100% |
| 2 | IPI00413778,IPI00647507                | 15670.9  | 100% |
| 1 | IPI00024157                            | 25159.4  | 100% |
| 1 | IPI00219005                            | 51787.9  | 100% |
| 2 | IPI00059292,IPI00219306                | 17258.6  | 100% |
| 1 | IPI00167710                            | 47356.2  | 0    |
| 3 | IPI00302592,IPI00333541,IPI00644576    | 279990.7 | 0    |
| 1 | IPI00480131                            | 278166.9 | 100% |

|   |                                        |          |      |
|---|----------------------------------------|----------|------|
| 1 | IPI00783128                            | 288938.8 | 98%  |
| 9 | IPI00215720,IPI00215721,IPI00215723,IF | 66952.9  | 0    |
| 1 | IPI00744362                            | 249334.4 | 70%  |
| 5 | IPI00015580,IPI00028718,IPI00607808,IF | 63555.2  | 0    |
| 1 | IPI00329327                            | 443604   | 0    |
| 3 | IPI00021081,IPI00217070,IPI00217071    | 37988.6  | 100% |
| 1 | IPI00477747                            | 93073.4  | 99%  |
| 1 | IPI00788671                            | 68587.1  | 100% |
| 1 | IPI00018387                            | 86658.7  | 70%  |
| 1 | IPI00260715                            | 53359.1  | 100% |
| 2 | IPI00412643,IPI00786930                | 31196.6  | 0    |
| 2 | IPI00016249,IPI00554715                | 69673.7  | 0    |
| 1 | IPI00012442                            | 52144.8  | 100% |
| 3 | IPI00216008,IPI00289800,IPI00760751    | 63810.1  | 100% |
| 1 | IPI00783446                            | 105320.6 | 0    |
| 1 | IPI00008790                            | 77048.8  | 70%  |
| 1 | IPI00029605                            | 58009.4  | 70%  |
| 1 | IPI00004669                            | 64715.1  | 0    |
| 1 | IPI00328391                            | 75372.6  | 0    |
| 1 | IPI00472068                            | 106831   | 0    |
| 1 | IPI00219018                            | 36035.3  | 100% |
| 2 | IPI00465260,IPI00783097                | 84632.6  | 0    |
| 2 | IPI00021807,IPI00759616                | 59699.7  | 100% |
| 1 | IPI00306140                            | 20891.8  | 100% |
| 1 | IPI00215768                            | 72749.8  | 100% |
| 1 | IPI00010090                            | 30709.3  | 0    |
| 1 | IPI00306543                            | 34150.9  | 100% |
| 1 | IPI00031461                            | 50647.5  | 100% |
| 1 | IPI00217952                            | 78789.7  | 99%  |
| 1 | IPI00023728                            | 35947.8  | 100% |
| 3 | IPI00441344,IPI00441550,IPI00797646    | 76075.8  | 0    |
| 1 | IPI00220766                            | 20760.8  | 100% |
| 1 | IPI00007102                            | 54995.3  | 70%  |
| 1 | IPI00018236                            | 20804.9  | 70%  |
| 2 | IPI00412987,IPI00549557                | 16695.6  | 0    |
| 1 | IPI00029079                            | 76698.7  | 0    |
| 1 | IPI00641950                            | 37871.3  | 70%  |
| 1 | IPI00009305                            | 32651.4  | 100% |
| 1 | IPI00012102                            | 62066    | 100% |
| 3 | IPI00171411,IPI00759659,IPI00784293    | 46254.7  | 100% |
| 1 | IPI00743931                            | 47128.2  | 70%  |
| 1 | IPI00219029                            | 46230.1  | 70%  |
| 1 | IPI00018206                            | 47458.6  | 100% |
| 1 | IPI00015688                            | 61633.3  | 100% |
| 1 | IPI00027497                            | 63130.5  | 100% |
| 4 | IPI00030910,IPI00150961,IPI00639921,IF | 72731.8  | 70%  |
| 2 | IPI00037448,IPI00550682                | 35651.1  | 0    |
| 3 | IPI00011722,IPI00218672,IPI00647318    | 16126.5  | 0    |
| 1 | IPI00218671                            | 15089.4  | 100% |
| 1 | IPI00026314                            | 85679.8  | 70%  |
| 1 | IPI00016862                            | 56239.4  | 61%  |
| 1 | IPI00657682                            | 25615    | 100% |
| 1 | IPI00219757                            | 23338.7  | 100% |
| 1 | IPI00290416                            | 44727.4  | 0    |
| 1 | IPI00021924                            | 22469.9  | 70%  |
| 3 | IPI00018278,IPI00218448,IPI00555841    | 13491.2  | 100% |
| 1 | IPI00220994                            | 40042.1  | 70%  |
| 1 | IPI00219038                            | 15310.7  | 100% |
| 1 | IPI00745553                            | 28841.6  | 0    |
| 1 | IPI00021808                            | 57394.5  | 70%  |
| 1 | IPI00453476                            | 28832.9  | 100% |
| 1 | IPI00020956                            | 26770.5  | 100% |
| 1 | IPI00007063                            | 22602.5  | 0    |

|    |                                        |          |      |
|----|----------------------------------------|----------|------|
| 2  | IPI00027851,IPI00829779                | 60671.8  | 70%  |
| 1  | IPI00012585                            | 63095.3  | 70%  |
| 1  | IPI00303174                            | 49955.7  | 100% |
| 1  | IPI00239077                            | 13784.1  | 100% |
| 1  | IPI00000335                            | 17143.7  | 70%  |
| 4  | IPI00024417,IPI00784470,IPI00788073,IF | 119371.7 | 0    |
| 2  | IPI00021370,IPI00784038                | 22389.1  | 100% |
| 1  | IPI00217468                            | 22563.7  | 100% |
| 1  | IPI00217465                            | 21347.8  | 100% |
| 2  | IPI00045109,IPI00219037                | 14216.2  | 100% |
| 1  | IPI00026272                            | 14118    | 70%  |
| 12 | IPI00018534,IPI00020101,IPI00152906,IF | 13888.6  | 70%  |
| 1  | IPI00152785                            | 13888.7  | 100% |
| 1  | IPI00453473                            | 11349.7  | 100% |
| 2  | IPI00216457,IPI00339274                | 14078    | 100% |
| 2  | IPI00454695,IPI00746251                | 21454.5  | 0    |
| 2  | IPI00171611,IPI00719351                | 15370.7  | 70%  |
| 1  | IPI00018246                            | 102470.4 | 0    |
| 1  | IPI00760554                            | 40958.2  | 100% |
| 2  | IPI00472112,IPI00472448                | 41446.2  | 0    |
| 3  | IPI00472138,IPI00655604,IPI00747198    | 40318.8  | 0    |
| 1  | IPI00472605                            | 41076.3  | 100% |
| 1  | IPI00028160                            | 39312.5  | 0    |
| 1  | IPI00419258                            | 24876.7  | 100% |
| 1  | IPI00219097                            | 24016.6  | 100% |
| 4  | IPI00217477,IPI00411540,IPI00640781,IF | 22962.7  | 100% |
| 1  | IPI00384857                            | 19898.4  | 70%  |
| 1  | IPI00011913                            | 30822.5  | 100% |
| 3  | IPI00215965,IPI00465365,IPI00797148    | 38828.1  | 0    |
| 1  | IPI00396378                            | 37412.3  | 100% |
| 1  | IPI00419373                            | 39577.1  | 0    |
| 3  | IPI00334587,IPI00334713,IPI00742926    | 35949.9  | 100% |
| 1  | IPI00216592                            | 32320    | 100% |
| 1  | IPI00477313                            | 33652.5  | 0    |
| 1  | IPI00045498                            | 27174.1  | 100% |
| 1  | IPI00003881                            | 45653.8  | 100% |
| 1  | IPI00013881                            | 49211.8  | 0    |
| 1  | IPI00026230                            | 49246.1  | 70%  |
| 2  | IPI00013877,IPI00216493                | 36909.6  | 100% |
| 1  | IPI00807545                            | 48546.6  | 100% |
| 1  | IPI00027834                            | 64114.8  | 100% |
| 2  | IPI00171903,IPI00383296                | 77499.3  | 100% |
| 1  | IPI00012074                            | 70925.8  | 100% |
| 1  | IPI00644079                            | 90567.2  | 100% |
| 2  | IPI00013070,IPI00167147                | 95721.7  | 0    |
| 2  | IPI00456887,IPI00827583                | 85087.2  | 0    |
| 3  | IPI00296291,IPI00642238,IPI00744429    | 61190.7  | 70%  |
| 1  | IPI00218493                            | 24562.2  | 70%  |
| 1  | IPI00382470                            | 98147.1  | 0    |
| 1  | IPI00334775                            | 84743.6  | 100% |
| 1  | IPI00027230                            | 92453.7  | 100% |
| 2  | IPI00304925,IPI00807640                | 70022    | 100% |
| 1  | IPI00002966                            | 94283    | 70%  |
| 2  | IPI00295485,IPI00828021                | 94470.4  | 70%  |
| 1  | IPI00003362                            | 72405.6  | 100% |
| 1  | IPI00003865                            | 70881.8  | 100% |
| 1  | IPI00007765                            | 73663.3  | 100% |
| 1  | IPI00025512                            | 22764.6  | 70%  |
| 1  | IPI00784154                            | 61037.7  | 100% |
| 1  | IPI00220362                            | 10913.7  | 100% |
| 1  | IPI00024284                            | 46878.5  | 0    |
| 2  | IPI00514983,IPI00796127                | 96847.8  | 100% |
| 1  | IPI00383665                            | 14896.8  | 0    |

|   |                                        |          |      |
|---|----------------------------------------|----------|------|
| 1 | IPI00000877                            | 111318.8 | 100% |
| 1 | IPI00644127                            | 144944.4 | 0    |
| 1 | IPI00790218                            | 51905.7  | 70%  |
| 1 | IPI00027223                            | 46642.5  | 70%  |
| 1 | IPI00011107                            | 50892.4  | 100% |
| 1 | IPI00220014                            | 32468.3  | 0    |
| 1 | IPI00289819                            | 274255.5 | 0    |
| 1 | IPI00297284                            | 35119.1  | 100% |
| 1 | IPI00556155                            | 32204.7  | 100% |
| 1 | IPI00291987                            | 28986.6  | 100% |
| 1 | IPI00002316                            | 21746.7  | 0    |
| 1 | IPI00005198                            | 43044.7  | 100% |
| 2 | IPI00298788,IPI00418313                | 95320.9  | 100% |
| 1 | IPI00219330                            | 74589.9  | 100% |
| 2 | IPI00009960,IPI00554469                | 82607.8  | 100% |
| 1 | IPI00020906                            | 30170.5  | 100% |
| 1 | IPI00291510                            | 55788.4  | 0    |
| 1 | IPI00005944                            | 52905.6  | 0    |
| 2 | IPI00007402,IPI00784008                | 119686.7 | 0    |
| 1 | IPI00009342                            | 189240.6 | 100% |
| 1 | IPI00375631                            | 17869.4  | 0    |
| 1 | IPI00375446                            | 19585.7  | 0    |
| 1 | IPI00014238                            | 68032.4  | 0    |
| 1 | IPI00060715                            | 35683.8  | 0    |
| 1 | IPI00082310                            | 44010    | 0    |
| 1 | IPI00641384                            | 251873   | 70%  |
| 1 | IPI00448751                            | 73592.1  | 100% |
| 1 | IPI00012837                            | 109668.3 | 0    |
| 1 | IPI00022296                            | 109848.7 | 0    |
| 4 | IPI00394906,IPI00398708,IPI00472303,IF | 69877.2  | 98%  |
| 2 | IPI00002818,IPI00218137                | 27447.9  | 100% |
| 1 | IPI00793215                            | 29103.3  | 70%  |
| 2 | IPI00002214,IPI00789457                | 57844.5  | 70%  |
| 1 | IPI00001639                            | 97153.3  | 100% |
| 1 | IPI00784347                            | 48041    | 100% |
| 1 | IPI00479145                            | 44075    | 100% |
| 1 | IPI00306959                            | 51401.4  | 100% |
| 1 | IPI00554648                            | 53688.2  | 100% |
| 1 | IPI00328753                            | 156258.3 | 100% |
| 1 | IPI00375294                            | 337133.7 | 100% |
| 1 | IPI00013976                            | 198045.3 | 0    |
| 1 | IPI00296922                            | 196057.1 | 0    |
| 1 | IPI00298281                            | 177587.1 | 70%  |
| 1 | IPI00103994                            | 134452.8 | 0    |
| 1 | IPI00010471                            | 70274.1  | 0    |
| 1 | IPI00217966                            | 36671.2  | 100% |
| 1 | IPI00219217                            | 36620.6  | 100% |
| 1 | IPI00032491                            | 99981.4  | 0    |
| 1 | IPI00455739                            | 41756.2  | 100% |
| 1 | IPI00023673                            | 65314.1  | 100% |
| 1 | IPI00293303                            | 49393    | 100% |
| 1 | IPI00005686                            | 56777.4  | 0    |
| 1 | IPI00026530                            | 57531.2  | 100% |
| 1 | IPI00009950                            | 40211.5  | 100% |
| 1 | IPI00216952                            | 65118.1  | 100% |
| 1 | IPI00217975                            | 66391.6  | 100% |
| 1 | IPI00009771                            | 69931.4  | 100% |
| 1 | IPI00169285                            | 65455.4  | 0    |
| 1 | IPI00377047                            | 50096.1  | 100% |
| 1 | IPI00397808                            | 17949.7  | 0    |
| 1 | IPI00456898                            | 14579.8  | 0    |
| 2 | IPI00183920,IPI00297477                | 28386.2  | 70%  |
| 1 | IPI00007797                            | 15146.4  | 100% |



|    |                                        |          |      |
|----|----------------------------------------|----------|------|
| 1  | IPI00786995                            | 465453.2 | 0    |
| 1  | IPI00023704                            | 65728.2  | 0    |
| 2  | IPI00002255,IPI00477088                | 319144.5 | 0    |
| 1  | IPI00396321                            | 34913.4  | 100% |
| 1  | IPI00785113                            | 89234.6  | 100% |
| 4  | IPI00328218,IPI00409640,IPI00409641,IF | 65569.2  | 0    |
| 2  | IPI00219077,IPI00514090                | 69269.1  | 100% |
| 1  | IPI00292657                            | 35852.5  | 0    |
| 2  | IPI00006932,IPI00216804                | 47488.6  | 100% |
| 1  | IPI00303882                            | 47027.6  | 0    |
| 1  | IPI00301104                            | 40749.4  | 98%  |
| 1  | IPI00018042                            | 34911    | 100% |
| 1  | IPI00439446                            | 75358.2  | 100% |
| 1  | IPI00009145                            | 72988.9  | 70%  |
| 1  | IPI00008868                            | 270602.3 | 99%  |
| 3  | IPI00003842,IPI00010728,IPI00472094    | 199522.8 | 0    |
| 5  | IPI00003783,IPI00219604,IPI00419792,IF | 43422.2  | 70%  |
| 2  | IPI00396171,IPI00745518                | 121002.5 | 70%  |
| 1  | IPI00017596                            | 29981.5  | 100% |
| 1  | IPI00008240                            | 101099.5 | 70%  |
| 3  | IPI00168520,IPI00473118,IPI00554542    | 104756.7 | 100% |
| 1  | IPI00789551                            | 99952.9  | 100% |
| 1  | IPI00013214                            | 90964.6  | 0    |
| 1  | IPI00031517                            | 92872.6  | 100% |
| 1  | IPI00552897                            | 226642.8 | 0    |
| 1  | IPI00291005                            | 36408.9  | 100% |
| 1  | IPI00291006                            | 35513.7  | 100% |
| 1  | IPI00010333                            | 15567.3  | 100% |
| 1  | IPI00008215                            | 64133.4  | 70%  |
| 1  | IPI00399089                            | 26059.9  | 70%  |
| 1  | IPI00016743                            | 61528.6  | 70%  |
| 5  | IPI00374065,IPI00455473,IPI00739902,IF | 213687.7 | 0    |
| 1  | IPI00293276                            | 12458.5  | 100% |
| 6  | IPI00023461,IPI00216505,IPI00398718,IF | 206790.4 | 0    |
| 1  | IPI00008561                            | 53989.9  | 0    |
| 3  | IPI00033494,IPI00220573,IPI00604523    | 19762.3  | 100% |
| 1  | IPI00005537                            | 21330.4  | 0    |
| 1  | IPI00219365                            | 67803.8  | 100% |
| 1  | IPI00171798                            | 75007.1  | 70%  |
| 1  | IPI00179589                            | 12877.3  | 100% |
| 11 | IPI00013955,IPI00218163,IPI00218164,IF | 122050.5 | 100% |
| 1  | IPI00011448                            | 54586.6  | 100% |
| 1  | IPI00019502                            | 226519.5 | 100% |
| 1  | IPI00789605                            | 16942.8  | 100% |
| 5  | IPI00008455,IPI00069126,IPI00642722,IF | 146035.8 | 0    |
| 1  | IPI00797126                            | 94662.5  | 100% |
| 4  | IPI00023860,IPI00789029,IPI00791065,IF | 45357    | 100% |
| 1  | IPI00017763                            | 42993    | 100% |
| 1  | IPI00293817                            | 34728.9  | 0    |
| 1  | IPI00306960                            | 62926.2  | 100% |
| 1  | IPI00179953                            | 85217.5  | 100% |
| 2  | IPI00435020,IPI00795918                | 93343    | 0    |
| 1  | IPI00019380                            | 91823.1  | 0    |
| 1  | IPI00604620                            | 76597.9  | 0    |
| 3  | IPI00022078,IPI00183085,IPI00783586    | 42816.9  | 70%  |
| 3  | IPI00291328,IPI00412122,IPI00646556    | 27373.8  | 0    |
| 1  | IPI00020008                            | 9054     | 100% |
| 2  | IPI00023754,IPI00607581                | 89586.5  | 0    |
| 1  | IPI00029817                            | 45449.3  | 0    |
| 7  | IPI00384998,IPI00470575,IPI00513695,IF | 139864.5 | 0    |
| 1  | IPI00026167                            | 14155.8  | 0    |
| 1  | IPI00026944                            | 136433.8 | 70%  |
| 1  | IPI00304435                            | 33292.9  | 0    |

|    |                                        |          |      |
|----|----------------------------------------|----------|------|
| 1  | IPI00004845                            | 28448.9  | 0    |
| 5  | IPI00023779,IPI00456663,IPI00456664,IF | 35878.6  | 70%  |
| 1  | IPI00549467                            | 30590.8  | 20%  |
| 1  | IPI00604590                            | 32624.2  | 100% |
| 1  | IPI00337541                            | 113881.2 | 70%  |
| 1  | IPI00411937                            | 66034    | 0    |
| 1  | IPI00304596                            | 54213.6  | 100% |
| 1  | IPI00006379                            | 59562.2  | 70%  |
| 1  | IPI00011140                            | 39142.7  | 0    |
| 1  | IPI00017672                            | 32533.5  | 100% |
| 1  | IPI00301579                            | 16552    | 0    |
| 1  | IPI00026216                            | 103261.1 | 70%  |
| 2  | IPI00220740,IPI00549248                | 29446.9  | 100% |
| 1  | IPI00787050                            | 86172.2  | 70%  |
| 3  | IPI00012069,IPI00619898,IPI00619966    | 30851    | 100% |
| 2  | IPI00219129,IPI00515016                | 25934.8  | 70%  |
| 4  | IPI00333776,IPI00333777,IPI00333778,IF | 144057.7 | 70%  |
| 1  | IPI00783655                            | 131702.5 | 0    |
| 2  | IPI00299594,IPI00398715                | 103104.6 | 0    |
| 1  | IPI00006451                            | 82545.4  | 70%  |
| 4  | IPI00022830,IPI00100197,IPI00376904,IF | 37307.8  | 100% |
| 1  | IPI00807412                            | 37930.9  | 0    |
| 2  | IPI00295542,IPI00790899                | 53861.6  | 100% |
| 1  | IPI00009123                            | 50206.3  | 100% |
| 1  | IPI00022145                            | 27278.7  | 100% |
| 1  | IPI00550746                            | 38225.7  | 70%  |
| 1  | IPI00646917                            | 26210.1  | 70%  |
| 2  | IPI00296913,IPI00646762                | 24309.8  | 100% |
| 1  | IPI00031558                            | 39107.5  | 0    |
| 2  | IPI00006196,IPI00292771                | 236512.8 | 100% |
| 1  | IPI00009901                            | 14460.9  | 70%  |
| 1  | IPI00016405                            | 27608.8  | 0    |
| 10 | IPI00006721,IPI00107749,IPI00107750,IF | 111642.9 | 0    |
| 1  | IPI00329760                            | 76278.4  | 0    |
| 2  | IPI00000581,IPI00409750                | 31406.7  | 70%  |
| 1  | IPI00010796                            | 57100.1  | 100% |
| 2  | IPI00299000,IPI00794875                | 43768.7  | 70%  |
| 3  | IPI00008524,IPI00410017,IPI00478522    | 70653.3  | 100% |
| 1  | IPI00026546                            | 25551.5  | 100% |
| 3  | IPI00402613,IPI00640518,IPI00647526    | 12022.6  | 70%  |
| 1  | IPI00217223                            | 49662.3  | 100% |
| 1  | IPI00787208                            | 54125.3  | 0    |
| 1  | IPI00219042                            | 100800.4 | 0    |
| 1  | IPI00298547                            | 19873.1  | 100% |
| 1  | IPI00449049                            | 113069.8 | 100% |
| 2  | IPI00018873,IPI00472879                | 55504.5  | 100% |
| 1  | IPI00218568                            | 11981.7  | 100% |
| 1  | IPI00016610                            | 37480.2  | 70%  |
| 4  | IPI00012066,IPI00216689,IPI00470509,IF | 38204.5  | 0    |
| 2  | IPI00176458,IPI00215992                | 133705.3 | 100% |
| 1  | IPI00009034                            | 87604.2  | 0    |
| 1  | IPI00001428                            | 86405.8  | 0    |
| 2  | IPI00294380,IPI00797038                | 70619.9  | 0    |
| 1  | IPI00021700                            | 28751.3  | 100% |
| 1  | IPI00301961                            | 84135    | 100% |
| 2  | IPI00029131,IPI00643663                | 70548.2  | 100% |
| 1  | IPI00238849                            | 105355.5 | 70%  |
| 1  | IPI00387168                            | 74352.6  | 100% |
| 1  | IPI00246058                            | 96802.5  | 70%  |
| 2  | IPI00011865,IPI00018822                | 42149.4  | 21%  |
| 1  | IPI00025252                            | 56766.6  | 100% |
| 1  | IPI00009904                            | 72916    | 100% |
| 2  | IPI00299571,IPI00644989                | 53883.9  | 100% |

|   |                                        |          |      |
|---|----------------------------------------|----------|------|
| 1 | IPI00219446                            | 21038.9  | 100% |
| 1 | IPI00006052                            | 16629.8  | 70%  |
| 1 | IPI00015891                            | 15296.6  | 100% |
| 1 | IPI00216691                            | 15036.3  | 100% |
| 2 | IPI00107555,IPI00219468                | 15070.3  | 70%  |
| 1 | IPI00219525                            | 53123.9  | 100% |
| 1 | IPI00169383                            | 44597.3  | 100% |
| 1 | IPI00029997                            | 27529.5  | 0    |
| 1 | IPI00550364                            | 68267.7  | 100% |
| 1 | IPI00220739                            | 21654.2  | 100% |
| 1 | IPI00011200                            | 56632.6  | 100% |
| 1 | IPI00299977                            | 13814.6  | 70%  |
| 1 | IPI00012575                            | 32095.7  | 100% |
| 3 | IPI00059366,IPI00304171,IPI00744148    | 39472.7  | 100% |
| 1 | IPI00479186                            | 57919.5  | 100% |
| 1 | IPI00398002                            | 518449.3 | 0    |
| 1 | IPI00398778                            | 516455.6 | 0    |
| 1 | IPI00019580                            | 90549.4  | 70%  |
| 1 | IPI00027192                            | 83534.5  | 0    |
| 1 | IPI00030255                            | 84768.8  | 100% |
| 1 | IPI00002624                            | 57175.3  | 13%  |
| 3 | IPI00044369,IPI00073777,IPI00640599    | 59565    | 0    |
| 1 | IPI00418458                            | 83907.7  | 100% |
| 1 | IPI00058192                            | 43938.2  | 99%  |
| 1 | IPI00015018                            | 32642.6  | 100% |
| 4 | IPI00301109,IPI00413014,IPI00470503,IF | 37903.4  | 0    |
| 1 | IPI00419585                            | 17994.9  | 100% |
| 1 | IPI00646304                            | 23725.2  | 100% |
| 1 | IPI00026519                            | 22022.4  | 70%  |
| 2 | IPI00020950,IPI00216196                | 42429.4  | 0    |
| 1 | IPI00103630                            | 85224.3  | 0    |
| 1 | IPI00218236                            | 37170.3  | 0    |
| 1 | IPI00398922                            | 20947.2  | 0    |
| 2 | IPI00419307,IPI00554737                | 65291.7  | 100% |
| 1 | IPI00514424                            | 37114.4  | 70%  |
| 1 | IPI00399307                            | 58083    | 100% |
| 1 | IPI00000874                            | 22092.9  | 100% |
| 1 | IPI00027350                            | 21874.4  | 100% |
| 2 | IPI00024919,IPI00374151                | 27674.7  | 100% |
| 1 | IPI00011937                            | 30523.1  | 0    |
| 1 | IPI00024915                            | 22008.3  | 100% |
| 1 | IPI00220301                            | 25018.1  | 100% |
| 2 | IPI00026154,IPI00792916                | 59407.7  | 100% |
| 1 | IPI00296337                            | 469077.5 | 100% |
| 2 | IPI00064328,IPI00441473                | 72667.1  | 38%  |
| 1 | IPI00012540                            | 97188.4  | 98%  |
| 1 | IPI00294004                            | 75105.4  | 99%  |
| 1 | IPI00004968                            | 55163.3  | 100% |
| 1 | IPI00305068                            | 106909.7 | 0    |
| 1 | IPI00011694                            | 26540.1  | 70%  |
| 2 | IPI00011695,IPI00815665                | 28118.8  | 100% |
| 2 | IPI00012503,IPI00219825                | 58094    | 100% |
| 2 | IPI00028122,IPI00333317                | 60085.9  | 100% |
| 2 | IPI00016832,IPI00472442                | 29538    | 100% |
| 1 | IPI00219622                            | 25880.9  | 100% |
| 2 | IPI00789638,IPI00790038                | 26558.4  | 100% |
| 1 | IPI00291922                            | 26393.3  | 100% |
| 1 | IPI00029623                            | 27381.5  | 70%  |
| 1 | IPI00024175                            | 27869.1  | 98%  |
| 1 | IPI00025019                            | 26472.5  | 100% |
| 1 | IPI00028006                            | 22819.5  | 100% |
| 1 | IPI00028004                            | 22931.6  | 100% |
| 1 | IPI00555956                            | 29187    | 70%  |

|   |                                        |          |      |
|---|----------------------------------------|----------|------|
| 1 | IPI00003217                            | 29947.9  | 0    |
| 1 | IPI00000783                            | 30336.8  | 70%  |
| 2 | IPI00023919,IPI00745502                | 45609.2  | 100% |
| 2 | IPI00299608,IPI00456695                | 105821.2 | 100% |
| 1 | IPI00105598                            | 47519.4  | 70%  |
| 2 | IPI00185374,IPI00335069                | 52888.2  | 0    |
| 2 | IPI00375380,IPI00549672                | 39853.6  | 70%  |
| 1 | IPI00012268                            | 100184.2 | 70%  |
| 1 | IPI00011603                            | 60961.6  | 70%  |
| 1 | IPI00019927                            | 37007.6  | 70%  |
| 1 | IPI00479722                            | 28819.8  | 100% |
| 2 | IPI00384051,IPI00746205                | 27344.3  | 100% |
| 3 | IPI00179964,IPI00183626,IPI00334175    | 57204.5  | 100% |
| 3 | IPI00015029,IPI00789101,IPI00789698    | 18679.9  | 100% |
| 1 | IPI00022048                            | 98537.6  | 0    |
| 1 | IPI00008998                            | 44406.7  | 70%  |
| 2 | IPI00298347,IPI00658023                | 67992.6  | 70%  |
| 1 | IPI00465186                            | 211667.8 | 100% |
| 2 | IPI00107831,IPI00642154                | 211825.8 | 100% |
| 3 | IPI00015756,IPI00470937,IPI00644648    | 162071.2 | 0    |
| 1 | IPI00004358                            | 96680.3  | 36%  |
| 2 | IPI00470525,IPI00783313                | 97134.4  | 0    |
| 1 | IPI00026665                            | 89640.2  | 0    |
| 1 | IPI00003590                            | 82560.7  | 100% |
| 3 | IPI00376394,IPI00479085,IPI00783371    | 77739.3  | 0    |
| 1 | IPI00291928                            | 23879.6  | 70%  |
| 1 | IPI00798089                            | 20762.7  | 100% |
| 1 | IPI00016342                            | 23472    | 70%  |
| 1 | IPI00008223                            | 43153.1  | 100% |
| 2 | IPI00011268,IPI00216044                | 32532.9  | 100% |
| 1 | IPI00792352                            | 26391.6  | 100% |
| 1 | IPI00414127                            | 23292.8  | 100% |
| 1 | IPI00221325                            | 358180.2 | 0    |
| 3 | IPI00329200,IPI00783829,IPI00793443    | 126506.7 | 70%  |
| 2 | IPI00019345,IPI00640287                | 20969.3  | 100% |
| 2 | IPI00328319,IPI00645329                | 47637.8  | 100% |
| 1 | IPI00646512                            | 52295.8  | 0    |
| 1 | IPI00217626                            | 102690.5 | 70%  |
| 2 | IPI00019046,IPI00783867                | 46878.6  | 100% |
| 1 | IPI00004273                            | 100171.1 | 70%  |
| 2 | IPI00001757,IPI00216659                | 19871.4  | 70%  |
| 1 | IPI00061178                            | 42125.4  | 100% |
| 2 | IPI00001661,IPI00787306                | 48126.3  | 100% |
| 1 | IPI00465044                            | 56066.8  | 70%  |
| 2 | IPI00375358,IPI00375359                | 128242.4 | 0    |
| 2 | IPI00027500,IPI00478231                | 21750.4  | 70%  |
| 1 | IPI00008554                            | 16532.2  | 70%  |
| 1 | IPI00162563                            | 113662.9 | 0    |
| 1 | IPI00550069                            | 49956.4  | 70%  |
| 1 | IPI00167090                            | 30081.5  | 100% |
| 1 | IPI00020127                            | 68121    | 0    |
| 1 | IPI00646500                            | 38791.9  | 0    |
| 1 | IPI00017373                            | 13551    | 0    |
| 2 | IPI00412579,IPI00827508                | 24814    | 100% |
| 4 | IPI00376798,IPI00647168,IPI00647674,IF | 20235.2  | 0    |
| 1 | IPI00024933                            | 17801.1  | 100% |
| 1 | IPI00555744                            | 23769.7  | 100% |
| 4 | IPI00413324,IPI00478208,IPI00514874,IF | 21379.4  | 0    |
| 1 | IPI00215719                            | 21617.2  | 70%  |
| 1 | IPI00219153                            | 14769.3  | 0    |
| 4 | IPI00021266,IPI00789159,IPI00793523,IF | 17678.2  | 100% |
| 2 | IPI00219155,IPI00382885                | 15780.4  | 70%  |
| 1 | IPI00219156                            | 12766.7  | 0    |

|    |                                        |          |      |
|----|----------------------------------------|----------|------|
| 2  | IPI00215790,IPI00792410                | 8200.5   | 70%  |
| 2  | IPI00000494,IPI00797983                | 34345.5  | 0    |
| 2  | IPI00012772,IPI00797230                | 28006.8  | 0    |
| 2  | IPI00008530,IPI00556485                | 34256.3  | 100% |
| 1  | IPI00008527                            | 11496.1  | 100% |
| 1  | IPI00008529                            | 11647.5  | 100% |
| 2  | IPI00008438,IPI00749512                | 18880.3  | 100% |
| 1  | IPI00221089                            | 17205.3  | 70%  |
| 1  | IPI00215780                            | 16042.5  | 99%  |
| 5  | IPI00013485,IPI00165486,IPI00455428,IF | 31307.2  | 0    |
| 4  | IPI00012493,IPI00794061,IPI00794659,IF | 13355    | 70%  |
| 3  | IPI00017448,IPI00387084,IPI00797280    | 9093.6   | 70%  |
| 26 | IPI00179330,IPI00418813,IPI00456429,IF | 17947.6  | 100% |
| 1  | IPI00011253                            | 26670.6  | 25%  |
| 1  | IPI00217030                            | 29581.3  | 0    |
| 1  | IPI00013415                            | 22109.5  | 100% |
| 1  | IPI00216587                            | 24188.4  | 70%  |
| 2  | IPI00413108,IPI00553164                | 33295.5  | 0    |
| 1  | IPI00220967                            | 152169.3 | 0    |
| 1  | IPI00215743                            | 152695.7 | 100% |
| 2  | IPI00027765,IPI00829898                | 28146.2  | 100% |
| 1  | IPI00009104                            | 51140.1  | 70%  |
| 1  | IPI00013895                            | 11723.1  | 0    |
| 1  | IPI00023234                            | 71207.2  | 0    |
| 2  | IPI00300631,IPI00646058                | 102624.8 | 100% |
| 1  | IPI00005648                            | 107456.4 | 0    |
| 1  | IPI00021417                            | 90239.1  | 100% |
| 1  | IPI00006025                            | 109918.3 | 70%  |
| 3  | IPI00306382,IPI00453116,IPI00479205    | 38301.6  | 0    |
| 1  | IPI00009362                            | 70852.7  | 100% |
| 1  | IPI00292071                            | 52990.2  | 100% |
| 1  | IPI00008944                            | 23711.9  | 100% |
| 1  | IPI00793201                            | 37021.5  | 70%  |
| 3  | IPI00299086,IPI00479018,IPI00794699    | 32427.3  | 100% |
| 1  | IPI00293167                            | 23007    | 0    |
| 2  | IPI00009794,IPI00106646                | 41788.9  | 100% |
| 1  | IPI00062419                            | 34655.2  | 0    |
| 1  | IPI00017376                            | 86463.1  | 70%  |
| 1  | IPI00745729                            | 53044.8  | 100% |
| 1  | IPI00029056                            | 42892.5  | 0    |
| 1  | IPI00014177                            | 41470.1  | 0    |
| 1  | IPI00033025                            | 50791.3  | 0    |
| 2  | IPI00410693,IPI00470497                | 44947.8  | 100% |
| 1  | IPI00553177                            | 46719.9  | 100% |
| 1  | IPI00027444                            | 42725.8  | 100% |
| 1  | IPI00016150                            | 46409.9  | 100% |
| 1  | IPI00301311                            | 32085.3  | 0    |
| 1  | IPI00419722                            | 97543    | 0    |
| 1  | IPI00386119                            | 80603.5  | 100% |
| 1  | IPI00017451                            | 88868.1  | 100% |
| 1  | IPI00017341                            | 51457.1  | 70%  |
| 1  | IPI00029764                            | 58833.3  | 70%  |
| 1  | IPI00026089                            | 145802.3 | 100% |
| 1  | IPI00221106                            | 100211.4 | 100% |
| 1  | IPI00300371                            | 135561.4 | 0    |
| 1  | IPI00017339                            | 44368.5  | 100% |
| 1  | IPI00010404                            | 10117.5  | 70%  |
| 1  | IPI00013890                            | 27756.8  | 100% |
| 1  | IPI00010740                            | 76131.5  | 100% |
| 3  | IPI00215884,IPI00218591,IPI00218592    | 27727.1  | 100% |
| 3  | IPI00301503,IPI00472633,IPI00555647    | 33648.7  | 100% |
| 1  | IPI00010204                            | 19312    | 70%  |
| 1  | IPI00003377                            | 27349.5  | 100% |

|   |                                        |          |      |
|---|----------------------------------------|----------|------|
| 2 | IPI00012340,IPI00793205                | 25524.9  | 100% |
| 3 | IPI00002520,IPI00748411,IPI00789370    | 55976.7  | 70%  |
| 1 | IPI00788826                            | 54007.1  | 0    |
| 1 | IPI00296197                            | 52067.8  | 0    |
| 1 | IPI00647217                            | 117790.3 | 0    |
| 1 | IPI00301364                            | 18640.3  | 0    |
| 1 | IPI00007084                            | 74287.3  | 0    |
| 6 | IPI00027493,IPI00554481,IPI00554611,IF | 57929.4  | 70%  |
| 1 | IPI00297211                            | 121892.8 | 70%  |
| 1 | IPI00797830                            | 122893.5 | 100% |
| 1 | IPI00150057                            | 124823.6 | 0    |
| 1 | IPI00794957                            | 21969.3  | 0    |
| 1 | IPI00291939                            | 143220.3 | 70%  |
| 1 | IPI00219420                            | 141529.1 | 100% |
| 1 | IPI00412898                            | 48243.6  | 100% |
| 2 | IPI00301528,IPI00395336                | 50844.2  | 70%  |
| 1 | IPI00140420                            | 101980.5 | 70%  |
| 2 | IPI00219483,IPI00290204                | 50601.3  | 70%  |
| 2 | IPI00027285,IPI00384173                | 24592.6  | 70%  |
| 1 | IPI00029267                            | 25469.5  | 70%  |
| 1 | IPI00302850                            | 13263.9  | 100% |
| 1 | IPI00017963                            | 13509.1  | 100% |
| 1 | IPI00017964                            | 13898.6  | 100% |
| 2 | IPI00029266,IPI00068430                | 10785.9  | 70%  |
| 1 | IPI00016572                            | 8478.3   | 0    |
| 1 | IPI00013830                            | 61477.9  | 0    |
| 2 | IPI00218733,IPI00783680                | 16103.7  | 100% |
| 1 | IPI00022314                            | 24704.6  | 70%  |
| 4 | IPI00217930,IPI00218618,IPI00218619,IF | 247820.2 | 0    |
| 1 | IPI00217882                            | 92051.6  | 0    |
| 1 | IPI00376403                            | 58379.3  | 0    |
| 2 | IPI00021000,IPI00385896                | 35404.6  | 100% |
| 3 | IPI00478292,IPI00744706,IPI00745092    | 285466.8 | 100% |
| 1 | IPI00005614                            | 274595.4 | 100% |
| 1 | IPI00783357                            | 47669.4  | 0    |
| 2 | IPI00143753,IPI00829908                | 118278.4 | 70%  |
| 1 | IPI00009822                            | 55688.3  | 0    |
| 1 | IPI00642816                            | 10093.6  | 0    |
| 1 | IPI00168554                            | 14241.4  | 100% |
| 1 | IPI00009032                            | 46821    | 100% |
| 1 | IPI00005154                            | 81059.6  | 100% |
| 1 | IPI00032826                            | 41314.4  | 70%  |
| 1 | IPI00001922                            | 94751.1  | 100% |
| 1 | IPI00013894                            | 62624.1  | 100% |
| 4 | IPI00479997,IPI00642012,IPI00643115,IF | 17285    | 100% |
| 1 | IPI00019971                            | 66422.7  | 0    |
| 1 | IPI00221222                            | 14377.9  | 100% |
| 1 | IPI00334514                            | 37391.5  | 0    |
| 1 | IPI00026970                            | 119899.4 | 100% |
| 2 | IPI00456681,IPI00784161                | 199257.8 | 0    |
| 4 | IPI00018140,IPI00402182,IPI00402183,IF | 69585.5  | 100% |
| 2 | IPI00239405,IPI00239406                | 796435.7 | 0    |
| 1 | IPI00410127                            | 281253.3 | 100% |
| 1 | IPI00296215                            | 34902.2  | 100% |
| 3 | IPI00550363,IPI00644531,IPI00647915    | 22373.9  | 100% |
| 1 | IPI00744692                            | 37523.7  | 100% |
| 1 | IPI00025815                            | 44721.7  | 100% |
| 1 | IPI00329633                            | 83419.8  | 100% |
| 1 | IPI00217236                            | 12837.2  | 100% |
| 2 | IPI00247871,IPI00744062                | 123944   | 70%  |
| 1 | IPI00219465                            | 47433.3  | 100% |
| 1 | IPI00290566                            | 60327.2  | 70%  |
| 1 | IPI00294619                            | 43416.2  | 100% |

|   |                                        |          |      |
|---|----------------------------------------|----------|------|
| 1 | IPI00021834                            | 34998.1  | 0    |
| 1 | IPI00022462                            | 84855.6  | 100% |
| 1 | IPI00328840                            | 27540.5  | 100% |
| 1 | IPI00104050                            | 108650.9 | 70%  |
| 4 | IPI00005615,IPI00183949,IPI00642600,IF | 41571.9  | 70%  |
| 2 | IPI00032292,IPI00642739                | 23153.1  | 100% |
| 3 | IPI00027166,IPI00787781,IPI00788747    | 24381.9  | 100% |
| 1 | IPI00643920                            | 67861.4  | 100% |
| 2 | IPI00298994,IPI00784273                | 271152.8 | 100% |
| 1 | IPI00013174                            | 69474.3  | 70%  |
| 1 | IPI00443909                            | 20634.5  | 100% |
| 1 | IPI00005087                            | 39578.1  | 0    |
| 1 | IPI00030131                            | 50653.4  | 100% |
| 1 | IPI00298362                            | 46022.2  | 100% |
| 1 | IPI00024364                            | 102340.8 | 0    |
| 1 | IPI00015602                            | 67439.2  | 0    |
| 1 | IPI00413611                            | 90711.7  | 0    |
| 3 | IPI00178667,IPI00414101,IPI00478232    | 183280.2 | 0    |
| 2 | IPI00023137,IPI00477672                | 37962.5  | 16%  |
| 4 | IPI00218323,IPI00619951,IPI00619958,IF | 19845.3  | 100% |
| 2 | IPI00465028,IPI00797687                | 30772.8  | 100% |
| 1 | IPI00178083                            | 29061.4  | 100% |
| 2 | IPI00298237,IPI00554538                | 61229.6  | 100% |
| 1 | IPI00640197                            | 139750.6 | 0    |
| 2 | IPI00022970,IPI00742682                | 265846.5 | 0    |
| 2 | IPI00438229,IPI00438230                | 88531    | 100% |
| 1 | IPI00301028                            | 52712.2  | 70%  |
| 1 | IPI00003515                            | 227625.5 | 0    |
| 4 | IPI00019450,IPI00642416,IPI00646322,IF | 60654.1  | 70%  |
| 1 | IPI00018768                            | 26165.4  | 100% |
| 2 | IPI00387144,IPI00792677                | 50133.7  | 100% |
| 1 | IPI00218343                            | 49877.4  | 70%  |
| 1 | IPI00011654                            | 49652.6  | 70%  |
| 1 | IPI00013475                            | 49889.1  | 100% |
| 1 | IPI00007752                            | 49812.7  | 100% |
| 2 | IPI00183508,IPI00385754                | 43901.5  | 0    |
| 1 | IPI00550917                            | 39530.8  | 0    |
| 1 | IPI00216298                            | 11719.3  | 100% |
| 1 | IPI00026328                            | 19188.4  | 100% |
| 1 | IPI00401264                            | 46954.5  | 70%  |
| 1 | IPI00395646                            | 43651.1  | 70%  |
| 2 | IPI00305692,IPI00642032                | 32233.4  | 0    |
| 1 | IPI00008552                            | 37414.8  | 70%  |
| 3 | IPI00005613,IPI00619914,IPI00619942    | 27854.2  | 0    |
| 3 | IPI00031556,IPI00746657,IPI00830039    | 53483.1  | 100% |
| 3 | IPI00181306,IPI00514856,IPI00646016    | 112562.2 | 99%  |
| 1 | IPI00645078                            | 117832.3 | 70%  |
| 2 | IPI00328154,IPI00375533                | 51835.4  | 0    |
| 2 | IPI00032957,IPI00450472                | 17989.5  | 0    |
| 1 | IPI00021347                            | 17844.3  | 100% |
| 1 | IPI00003949                            | 17120.6  | 0    |
| 7 | IPI00019599,IPI00030962,IPI00397947,IF | 25778.9  | 0    |
| 1 | IPI00024502                            | 63836    | 0    |
| 1 | IPI00018352                            | 24806.3  | 100% |
| 6 | IPI00219512,IPI00219513,IPI00299313,IF | 36061.7  | 0    |
| 1 | IPI00294495                            | 19441    | 0    |
| 1 | IPI00619903                            | 177361.2 | 58%  |
| 1 | IPI00031420                            | 55007.3  | 100% |
| 3 | IPI00014919,IPI00329331,IPI00395676    | 56932.9  | 0    |
| 1 | IPI00399139                            | 20436.8  | 100% |
| 2 | IPI00219913,IPI00640357                | 56052.3  | 100% |
| 1 | IPI00000728                            | 112405.3 | 0    |
| 2 | IPI00024664,IPI00375145                | 95770.1  | 70%  |

|   |                                     |          |      |
|---|-------------------------------------|----------|------|
| 3 | IPI00003965,IPI00646721,IPI00783739 | 128256.9 | 0    |
| 1 | IPI00170692                         | 27875.9  | 100% |
| 2 | IPI00000873,IPI00829641             | 140459.5 | 70%  |
| 1 | IPI00156689                         | 41901.8  | 0    |
| 2 | IPI00291175,IPI00307162             | 116706.3 | 0    |
| 1 | IPI00022774                         | 89306.8  | 100% |
| 1 | IPI00069058                         | 67239.9  | 100% |
| 1 | IPI00218852                         | 92677.2  | 100% |
| 1 | IPI00020719                         | 56509.9  | 70%  |
| 1 | IPI00018931                         | 91692    | 100% |
| 1 | IPI00412737                         | 48835.5  | 70%  |
| 2 | IPI00216256,IPI00746165             | 57984.2  | 70%  |
| 2 | IPI00298961,IPI00784388             | 123370.9 | 70%  |
| 1 | IPI00220834                         | 82689.1  | 100% |
| 2 | IPI00465430,IPI00644712             | 69855.4  | 100% |
| 1 | IPI00031812                         | 35905.8  | 100% |
| 2 | IPI00216318,IPI00759832             | 28065.1  | 70%  |
| 1 | IPI00000816                         | 29157    | 100% |
| 1 | IPI00220642                         | 28285.1  | 70%  |
| 1 | IPI00018146                         | 27747.4  | 100% |
| 1 | IPI00021263                         | 27727.9  | 100% |
| 2 | IPI00333858,IPI00748303             | 117059.9 | 0    |
| 1 | IPI00219760                         | 41541.8  | 0    |



## dem searching

| H1688-Rep2 (CCL257-S) | H1688-Rep3 (CCL257-S) | # Unique peptide H1688-Rep1 (C) | # Unique peptide H1688-Rep2 (C) |
|-----------------------|-----------------------|---------------------------------|---------------------------------|
| 100%                  | 100%                  | 3                               | 3                               |
| 100%                  | 100%                  | 1                               | 2                               |
| 67%                   | 100%                  | 1                               | 1                               |
| 100%                  | 100%                  | 0                               | 7                               |
| 100%                  | 0                     | 1                               | 2                               |
| 100%                  | 0                     | 1                               | 2                               |
| 100%                  | 100%                  | 16                              | 14                              |
| 100%                  | 100%                  | 0                               | 2                               |
| 67%                   | 100%                  | 2                               | 1                               |
| 100%                  | 100%                  | 6                               | 8                               |
| 0                     | 0                     | 16                              | 0                               |
| 67%                   | 99%                   | 0                               | 1                               |
| 100%                  | 100%                  | 1                               | 3                               |
| 100%                  | 69%                   | 0                               | 2                               |
| 100%                  | 100%                  | 3                               | 4                               |
| 100%                  | 98%                   | 1                               | 2                               |
| 0                     | 100%                  | 0                               | 0                               |
| 100%                  | 69%                   | 0                               | 2                               |
| 100%                  | 100%                  | 2                               | 3                               |
| 100%                  | 100%                  | 1                               | 4                               |
| 100%                  | 100%                  | 1                               | 3                               |
| 67%                   | 98%                   | 0                               | 1                               |
| 100%                  | 100%                  | 4                               | 5                               |
| 100%                  | 100%                  | 3                               | 3                               |
| 100%                  | 100%                  | 12                              | 14                              |
| 100%                  | 100%                  | 3                               | 3                               |
| 100%                  | 100%                  | 5                               | 15                              |
| 100%                  | 100%                  | 2                               | 3                               |
| 100%                  | 100%                  | 2                               | 3                               |
| 100%                  | 100%                  | 3                               | 3                               |
| 100%                  | 0                     | 0                               | 2                               |
| 100%                  | 100%                  | 2                               | 3                               |
| 100%                  | 0                     | 0                               | 2                               |
| 100%                  | 0                     | 0                               | 4                               |
| 0                     | 100%                  | 2                               | 0                               |
| 67%                   | 69%                   | 2                               | 1                               |
| 100%                  | 100%                  | 10                              | 11                              |
| 100%                  | 100%                  | 3                               | 5                               |
| 100%                  | 69%                   | 1                               | 2                               |
| 100%                  | 99%                   | 2                               | 3                               |
| 100%                  | 100%                  | 6                               | 7                               |
| 100%                  | 100%                  | 3                               | 5                               |
| 100%                  | 0                     | 2                               | 4                               |
| 100%                  | 100%                  | 6                               | 6                               |
| 100%                  | 100%                  | 8                               | 9                               |
| 100%                  | 100%                  | 3                               | 6                               |
| 100%                  | 100%                  | 0                               | 5                               |
| 67%                   | 100%                  | 1                               | 1                               |
| 100%                  | 100%                  | 1                               | 1                               |
| 100%                  | 100%                  | 10                              | 14                              |
| 100%                  | 100%                  | 0                               | 2                               |
| 100%                  | 100%                  | 0                               | 2                               |
| 100%                  | 100%                  | 15                              | 16                              |
| 100%                  | 100%                  | 2                               | 6                               |
| 100%                  | 100%                  | 7                               | 6                               |
| 100%                  | 100%                  | 8                               | 8                               |
| 100%                  | 69%                   | 1                               | 2                               |
| 100%                  | 100%                  | 4                               | 3                               |
| 100%                  | 100%                  | 3                               | 6                               |
| 100%                  | 0                     | 0                               | 2                               |

|      |      |    |    |
|------|------|----|----|
| 100% | 100% | 0  | 3  |
| 100% | 100% | 5  | 6  |
| 100% | 69%  | 1  | 2  |
| 100% | 100% | 0  | 8  |
| 100% | 100% | 7  | 8  |
| 100% | 100% | 14 | 14 |
| 67%  | 100% | 0  | 1  |
| 0    | 100% | 2  | 0  |
| 100% | 69%  | 0  | 2  |
| 100% | 100% | 2  | 4  |
| 100% | 100% | 2  | 3  |
| 39%  | 100% | 0  | 0  |
| 100% | 0    | 0  | 2  |
| 100% | 100% | 1  | 3  |
| 98%  | 69%  | 0  | 1  |
| 100% | 98%  | 1  | 3  |
| 100% | 100% | 3  | 3  |
| 100% | 100% | 2  | 3  |
| 100% | 0    | 0  | 3  |
| 100% | 100% | 6  | 8  |
| 100% | 100% | 8  | 9  |
| 100% | 100% | 2  | 2  |
| 67%  | 100% | 2  | 1  |
| 100% | 69%  | 1  | 2  |
| 100% | 69%  | 0  | 3  |
| 100% | 100% | 3  | 9  |
| 100% | 69%  | 0  | 2  |
| 100% | 100% | 1  | 7  |
| 100% | 69%  | 4  | 3  |
| 0    | 100% | 0  | 0  |
| 100% | 100% | 1  | 2  |
| 67%  | 100% | 0  | 1  |
| 98%  | 100% | 1  | 1  |
| 100% | 100% | 1  | 2  |
| 67%  | 100% | 1  | 1  |
| 100% | 0    | 2  | 2  |
| 100% | 100% | 4  | 3  |
| 100% | 100% | 2  | 2  |
| 100% | 100% | 0  | 2  |
| 100% | 69%  | 2  | 2  |
| 100% | 100% | 2  | 3  |
| 67%  | 98%  | 0  | 1  |
| 100% | 37%  | 1  | 2  |
| 100% | 0    | 2  | 2  |
| 100% | 100% | 2  | 5  |
| 100% | 100% | 0  | 3  |
| 100% | 0    | 3  | 4  |
| 98%  | 69%  | 1  | 1  |
| 100% | 100% | 2  | 2  |
| 100% | 0    | 0  | 2  |
| 100% | 100% | 2  | 3  |
| 100% | 0    | 0  | 4  |
| 100% | 100% | 1  | 2  |
| 100% | 100% | 2  | 3  |
| 100% | 100% | 6  | 7  |
| 100% | 100% | 2  | 2  |
| 0    | 100% | 13 | 0  |
| 98%  | 69%  | 0  | 1  |
| 100% | 100% | 0  | 2  |
| 100% | 100% | 7  | 11 |
| 100% | 100% | 6  | 8  |
| 100% | 100% | 6  | 8  |
| 100% | 100% | 0  | 2  |

|      |      |    |    |
|------|------|----|----|
| 100% | 100% | 3  | 5  |
| 99%  | 0    | 0  | 1  |
| 100% | 100% | 2  | 4  |
| 0    | 69%  | 2  | 0  |
| 100% | 100% | 3  | 3  |
| 100% | 100% | 6  | 9  |
| 100% | 100% | 1  | 2  |
| 100% | 100% | 2  | 2  |
| 100% | 100% | 5  | 4  |
| 65%  | 100% | 0  | 0  |
| 0    | 98%  | 0  | 0  |
| 100% | 100% | 5  | 6  |
| 67%  | 100% | 1  | 1  |
| 100% | 100% | 3  | 5  |
| 100% | 100% | 3  | 4  |
| 100% | 100% | 4  | 4  |
| 67%  | 100% | 0  | 1  |
| 100% | 100% | 0  | 6  |
| 67%  | 100% | 0  | 1  |
| 67%  | 100% | 0  | 1  |
| 100% | 100% | 1  | 3  |
| 100% | 0    | 6  | 7  |
| 100% | 100% | 11 | 11 |
| 100% | 100% | 3  | 1  |
| 100% | 100% | 7  | 8  |
| 100% | 100% | 15 | 15 |
| 100% | 100% | 8  | 7  |
| 0    | 0    | 1  | 0  |
| 100% | 100% | 17 | 15 |
| 100% | 100% | 30 | 26 |
| 100% | 100% | 1  | 5  |
| 100% | 100% | 2  | 4  |
| 100% | 100% | 2  | 2  |
| 100% | 100% | 10 | 13 |
| 100% | 100% | 4  | 6  |
| 67%  | 100% | 3  | 1  |
| 100% | 100% | 1  | 2  |
| 100% | 100% | 0  | 17 |
| 100% | 100% | 6  | 6  |
| 100% | 100% | 5  | 7  |
| 100% | 100% | 16 | 27 |
| 100% | 100% | 3  | 4  |
| 100% | 100% | 2  | 5  |
| 100% | 99%  | 0  | 2  |
| 0    | 100% | 1  | 0  |
| 100% | 100% | 4  | 5  |
| 100% | 100% | 0  | 6  |
| 100% | 100% | 4  | 4  |
| 67%  | 100% | 1  | 1  |
| 98%  | 0    | 0  | 1  |
| 67%  | 0    | 2  | 1  |
| 99%  | 69%  | 2  | 1  |
| 100% | 100% | 3  | 6  |
| 100% | 100% | 0  | 1  |
| 100% | 100% | 2  | 2  |
| 100% | 100% | 1  | 3  |
| 100% | 100% | 20 | 21 |
| 0    | 100% | 1  | 0  |
| 100% | 0    | 0  | 2  |
| 100% | 0    | 0  | 3  |
| 100% | 100% | 1  | 3  |
| 100% | 100% | 1  | 2  |
| 100% | 100% | 0  | 2  |

|      |      |   |    |
|------|------|---|----|
| 67%  | 100% | 1 | 1  |
| 67%  | 69%  | 2 | 1  |
| 100% | 100% | 2 | 4  |
| 67%  | 100% | 0 | 1  |
| 100% | 100% | 4 | 5  |
| 100% | 100% | 3 | 3  |
| 100% | 100% | 0 | 2  |
| 100% | 0    | 0 | 3  |
| 100% | 0    | 0 | 2  |
| 100% | 0    | 2 | 2  |
| 100% | 69%  | 1 | 4  |
| 43%  | 69%  | 2 | 0  |
| 99%  | 69%  | 1 | 1  |
| 0    | 100% | 2 | 0  |
| 100% | 100% | 8 | 8  |
| 100% | 100% | 4 | 8  |
| 100% | 52%  | 1 | 4  |
| 100% | 100% | 4 | 4  |
| 67%  | 100% | 0 | 1  |
| 100% | 100% | 2 | 2  |
| 0    | 100% | 0 | 0  |
| 100% | 100% | 5 | 7  |
| 0    | 0    | 2 | 0  |
| 100% | 100% | 3 | 3  |
| 100% | 0    | 1 | 2  |
| 100% | 100% | 1 | 3  |
| 100% | 100% | 2 | 4  |
| 100% | 100% | 4 | 5  |
| 100% | 100% | 3 | 7  |
| 100% | 100% | 1 | 4  |
| 100% | 100% | 2 | 3  |
| 100% | 100% | 1 | 3  |
| 100% | 98%  | 0 | 2  |
| 0    | 0    | 2 | 0  |
| 100% | 100% | 2 | 4  |
| 0    | 100% | 0 | 0  |
| 67%  | 100% | 0 | 1  |
| 100% | 100% | 2 | 8  |
| 0    | 100% | 0 | 0  |
| 100% | 69%  | 2 | 3  |
| 100% | 69%  | 1 | 2  |
| 100% | 100% | 5 | 11 |
| 67%  | 100% | 1 | 1  |
| 100% | 69%  | 0 | 2  |
| 100% | 69%  | 1 | 2  |
| 100% | 100% | 0 | 3  |
| 67%  | 100% | 1 | 1  |
| 100% | 100% | 1 | 3  |
| 100% | 100% | 8 | 10 |
| 100% | 0    | 0 | 2  |
| 100% | 0    | 0 | 1  |
| 67%  | 0    | 2 | 1  |
| 100% | 69%  | 0 | 2  |
| 100% | 100% | 0 | 2  |
| 99%  | 0    | 0 | 1  |
| 100% | 100% | 1 | 2  |
| 100% | 100% | 3 | 4  |
| 100% | 100% | 2 | 2  |
| 100% | 100% | 1 | 4  |
| 100% | 100% | 4 | 3  |
| 100% | 0    | 0 | 2  |
| 100% | 0    | 0 | 2  |
| 100% | 69%  | 0 | 2  |

|      |      |    |    |
|------|------|----|----|
| 100% | 100% | 19 | 23 |
| 100% | 0    | 8  | 9  |
| 100% | 100% | 4  | 4  |
| 0    | 0    | 3  | 0  |
| 100% | 100% | 0  | 3  |
| 67%  | 100% | 1  | 1  |
| 100% | 100% | 4  | 8  |
| 100% | 100% | 7  | 22 |
| 100% | 100% | 1  | 2  |
| 100% | 100% | 0  | 4  |
| 100% | 0    | 0  | 2  |
| 100% | 99%  | 2  | 3  |
| 0    | 100% | 0  | 0  |
| 100% | 100% | 0  | 2  |
| 100% | 100% | 1  | 2  |
| 100% | 69%  | 2  | 3  |
| 100% | 100% | 1  | 2  |
| 67%  | 100% | 1  | 1  |
| 100% | 0    | 3  | 2  |
| 100% | 100% | 1  | 4  |
| 100% | 0    | 0  | 2  |
| 100% | 0    | 1  | 4  |
| 100% | 69%  | 0  | 2  |
| 100% | 100% | 6  | 6  |
| 100% | 0    | 1  | 2  |
| 100% | 100% | 6  | 5  |
| 100% | 0    | 0  | 3  |
| 67%  | 100% | 0  | 1  |
| 100% | 100% | 19 | 19 |
| 100% | 100% | 0  | 2  |
| 100% | 100% | 0  | 2  |
| 67%  | 100% | 0  | 1  |
| 67%  | 100% | 1  | 1  |
| 100% | 0    | 0  | 2  |
| 100% | 100% | 3  | 12 |
| 100% | 100% | 1  | 2  |
| 100% | 100% | 1  | 3  |
| 100% | 100% | 8  | 8  |
| 100% | 0    | 0  | 2  |
| 100% | 100% | 3  | 2  |
| 100% | 69%  | 1  | 2  |
| 100% | 100% | 2  | 2  |
| 100% | 100% | 5  | 4  |
| 100% | 100% | 2  | 9  |
| 100% | 100% | 1  | 3  |
| 100% | 100% | 2  | 4  |
| 100% | 100% | 2  | 3  |
| 100% | 100% | 1  | 3  |
| 100% | 69%  | 0  | 2  |
| 100% | 100% | 0  | 11 |
| 67%  | 100% | 2  | 1  |
| 100% | 100% | 3  | 6  |
| 100% | 69%  | 2  | 2  |
| 100% | 100% | 1  | 2  |
| 67%  | 100% | 0  | 1  |
| 67%  | 69%  | 2  | 1  |
| 100% | 100% | 3  | 3  |
| 100% | 100% | 6  | 7  |
| 100% | 100% | 2  | 4  |
| 100% | 100% | 3  | 3  |
| 0    | 100% | 0  | 0  |
| 100% | 100% | 0  | 6  |
| 100% | 100% | 5  | 10 |

|      |      |    |    |
|------|------|----|----|
| 100% | 100% | 1  | 4  |
| 98%  | 0    | 0  | 1  |
| 100% | 100% | 1  | 6  |
| 0    | 100% | 0  | 0  |
| 100% | 100% | 0  | 17 |
| 100% | 100% | 4  | 3  |
| 67%  | 98%  | 1  | 1  |
| 100% | 0    | 6  | 9  |
| 100% | 69%  | 1  | 4  |
| 100% | 100% | 3  | 5  |
| 100% | 100% | 0  | 3  |
| 67%  | 99%  | 0  | 1  |
| 100% | 100% | 2  | 4  |
| 100% | 100% | 4  | 7  |
| 100% | 100% | 0  | 8  |
| 0    | 100% | 1  | 0  |
| 67%  | 100% | 1  | 1  |
| 0    | 100% | 0  | 0  |
| 100% | 69%  | 0  | 2  |
| 100% | 100% | 0  | 11 |
| 0    | 100% | 10 | 0  |
| 98%  | 69%  | 0  | 1  |
| 100% | 100% | 3  | 7  |
| 100% | 100% | 17 | 16 |
| 100% | 100% | 6  | 7  |
| 100% | 100% | 0  | 2  |
| 100% | 100% | 12 | 11 |
| 100% | 100% | 10 | 12 |
| 100% | 100% | 1  | 4  |
| 100% | 100% | 9  | 9  |
| 100% | 69%  | 0  | 3  |
| 100% | 100% | 3  | 5  |
| 67%  | 100% | 1  | 1  |
| 67%  | 100% | 1  | 1  |
| 100% | 100% | 0  | 2  |
| 100% | 0    | 0  | 2  |
| 100% | 100% | 1  | 3  |
| 100% | 100% | 3  | 2  |
| 100% | 100% | 6  | 9  |
| 100% | 100% | 6  | 7  |
| 100% | 69%  | 1  | 2  |
| 100% | 100% | 1  | 4  |
| 100% | 100% | 2  | 4  |
| 100% | 100% | 5  | 8  |
| 100% | 100% | 6  | 8  |
| 100% | 100% | 1  | 2  |
| 100% | 0    | 0  | 2  |
| 100% | 100% | 0  | 3  |
| 0    | 0    | 4  | 0  |
| 100% | 100% | 1  | 2  |
| 100% | 100% | 0  | 3  |
| 100% | 100% | 7  | 3  |
| 100% | 100% | 4  | 4  |
| 100% | 100% | 0  | 2  |
| 67%  | 100% | 1  | 1  |
| 67%  | 100% | 3  | 1  |
| 100% | 100% | 1  | 5  |
| 0    | 69%  | 3  | 0  |
| 100% | 69%  | 0  | 2  |
| 67%  | 100% | 1  | 1  |
| 100% | 100% | 5  | 7  |
| 0    | 100% | 7  | 0  |
| 100% | 100% | 0  | 2  |

|      |      |    |    |
|------|------|----|----|
| 100% | 100% | 1  | 4  |
| 100% | 100% | 1  | 2  |
| 100% | 100% | 2  | 5  |
| 100% | 100% | 2  | 4  |
| 100% | 100% | 1  | 2  |
| 99%  | 69%  | 0  | 1  |
| 100% | 100% | 2  | 3  |
| 98%  | 69%  | 2  | 1  |
| 0    | 0    | 4  | 0  |
| 100% | 69%  | 2  | 2  |
| 100% | 69%  | 1  | 2  |
| 100% | 100% | 1  | 2  |
| 100% | 0    | 3  | 2  |
| 100% | 100% | 11 | 7  |
| 67%  | 100% | 6  | 1  |
| 0    | 100% | 0  | 0  |
| 0    | 100% | 1  | 0  |
| 100% | 100% | 0  | 4  |
| 100% | 100% | 8  | 11 |
| 100% | 0    | 0  | 5  |
| 100% | 0    | 0  | 2  |
| 100% | 100% | 2  | 2  |
| 100% | 100% | 0  | 3  |
| 100% | 100% | 9  | 9  |
| 100% | 100% | 2  | 2  |
| 100% | 100% | 7  | 7  |
| 67%  | 100% | 1  | 1  |
| 100% | 100% | 2  | 4  |
| 100% | 100% | 0  | 12 |
| 100% | 100% | 20 | 16 |
| 100% | 100% | 0  | 10 |
| 100% | 100% | 4  | 4  |
| 100% | 0    | 7  | 10 |
| 67%  | 100% | 0  | 1  |
| 100% | 100% | 2  | 3  |
| 100% | 100% | 2  | 6  |
| 100% | 0    | 0  | 10 |
| 100% | 69%  | 1  | 2  |
| 100% | 100% | 4  | 6  |
| 100% | 100% | 6  | 8  |
| 100% | 100% | 7  | 8  |
| 100% | 100% | 6  | 8  |
| 100% | 100% | 4  | 6  |
| 100% | 100% | 8  | 10 |
| 100% | 100% | 0  | 2  |
| 100% | 69%  | 0  | 1  |
| 100% | 100% | 1  | 2  |
| 100% | 69%  | 1  | 3  |
| 100% | 100% | 0  | 26 |
| 100% | 100% | 16 | 14 |
| 100% | 100% | 25 | 31 |
| 100% | 100% | 23 | 21 |
| 100% | 100% | 1  | 5  |
| 100% | 69%  | 1  | 3  |
| 100% | 100% | 20 | 19 |
| 100% | 100% | 21 | 18 |
| 100% | 100% | 9  | 11 |
| 100% | 69%  | 1  | 2  |
| 100% | 100% | 17 | 14 |
| 100% | 100% | 4  | 4  |
| 100% | 100% | 0  | 11 |
| 100% | 100% | 4  | 7  |
| 0    | 100% | 0  | 0  |

|      |      |    |    |
|------|------|----|----|
| 100% | 100% | 12 | 16 |
| 100% | 69%  | 0  | 2  |
| 100% | 100% | 1  | 2  |
| 100% | 100% | 1  | 6  |
| 100% | 100% | 2  | 7  |
| 98%  | 100% | 0  | 1  |
| 100% | 100% | 0  | 2  |
| 100% | 100% | 12 | 12 |
| 100% | 0    | 5  | 8  |
| 100% | 100% | 2  | 6  |
| 100% | 0    | 0  | 2  |
| 100% | 100% | 5  | 6  |
| 0    | 100% | 11 | 0  |
| 100% | 0    | 11 | 15 |
| 100% | 100% | 5  | 6  |
| 100% | 69%  | 2  | 3  |
| 100% | 98%  | 0  | 2  |
| 100% | 0    | 0  | 1  |
| 100% | 100% | 0  | 4  |
| 100% | 100% | 2  | 7  |
| 100% | 69%  | 0  | 2  |
| 67%  | 100% | 0  | 1  |
| 100% | 0    | 0  | 2  |
| 100% | 0    | 0  | 2  |
| 0    | 100% | 0  | 0  |
| 98%  | 69%  | 1  | 1  |
| 100% | 100% | 3  | 5  |
| 0    | 100% | 0  | 0  |
| 100% | 69%  | 0  | 2  |
| 67%  | 69%  | 1  | 1  |
| 100% | 100% | 6  | 7  |
| 0    | 100% | 1  | 0  |
| 98%  | 0    | 1  | 1  |
| 100% | 100% | 3  | 7  |
| 100% | 100% | 4  | 11 |
| 100% | 100% | 7  | 7  |
| 100% | 100% | 6  | 9  |
| 100% | 100% | 15 | 19 |
| 100% | 100% | 9  | 15 |
| 100% | 100% | 9  | 18 |
| 100% | 100% | 0  | 3  |
| 100% | 98%  | 0  | 3  |
| 100% | 100% | 1  | 10 |
| 49%  | 100% | 0  | 0  |
| 100% | 0    | 0  | 2  |
| 100% | 100% | 11 | 10 |
| 100% | 100% | 4  | 6  |
| 67%  | 100% | 0  | 1  |
| 100% | 100% | 3  | 2  |
| 100% | 100% | 11 | 13 |
| 100% | 100% | 8  | 9  |
| 100% | 100% | 0  | 2  |
| 100% | 100% | 2  | 4  |
| 100% | 100% | 6  | 7  |
| 100% | 100% | 21 | 19 |
| 100% | 100% | 9  | 13 |
| 100% | 100% | 2  | 3  |
| 99%  | 100% | 0  | 1  |
| 100% | 0    | 2  | 2  |
| 0    | 100% | 0  | 0  |
| 100% | 69%  | 0  | 3  |
| 98%  | 100% | 1  | 1  |
| 100% | 100% | 2  | 6  |



|      |      |    |    |
|------|------|----|----|
| 100% | 0    | 0  | 11 |
| 98%  | 69%  | 0  | 1  |
| 67%  | 100% | 0  | 1  |
| 100% | 100% | 2  | 3  |
| 100% | 100% | 2  | 3  |
| 100% | 0    | 0  | 2  |
| 100% | 100% | 2  | 4  |
| 0    | 100% | 0  | 0  |
| 100% | 100% | 2  | 4  |
| 100% | 98%  | 0  | 2  |
| 67%  | 100% | 1  | 1  |
| 100% | 69%  | 2  | 2  |
| 100% | 100% | 2  | 6  |
| 100% | 100% | 1  | 5  |
| 100% | 100% | 1  | 3  |
| 67%  | 100% | 0  | 1  |
| 67%  | 100% | 1  | 1  |
| 67%  | 99%  | 1  | 1  |
| 100% | 100% | 3  | 5  |
| 13%  | 100% | 1  | 0  |
| 100% | 100% | 6  | 15 |
| 100% | 100% | 10 | 10 |
| 100% | 69%  | 0  | 3  |
| 100% | 100% | 2  | 2  |
| 100% | 69%  | 0  | 2  |
| 100% | 100% | 6  | 6  |
| 100% | 100% | 5  | 9  |
| 100% | 100% | 3  | 3  |
| 100% | 100% | 1  | 2  |
| 100% | 100% | 1  | 1  |
| 100% | 100% | 1  | 2  |
| 100% | 31%  | 0  | 2  |
| 100% | 100% | 3  | 3  |
| 67%  | 100% | 0  | 1  |
| 100% | 100% | 0  | 4  |
| 100% | 100% | 3  | 2  |
| 100% | 69%  | 0  | 2  |
| 0    | 100% | 2  | 0  |
| 100% | 69%  | 1  | 2  |
| 100% | 69%  | 2  | 3  |
| 100% | 100% | 3  | 3  |
| 100% | 100% | 2  | 4  |
| 100% | 100% | 13 | 17 |
| 100% | 0    | 2  | 5  |
| 67%  | 100% | 0  | 1  |
| 100% | 100% | 3  | 3  |
| 100% | 100% | 4  | 4  |
| 100% | 100% | 3  | 4  |
| 0    | 100% | 0  | 0  |
| 100% | 100% | 5  | 8  |
| 100% | 100% | 5  | 6  |
| 67%  | 100% | 0  | 1  |
| 67%  | 100% | 0  | 1  |
| 100% | 100% | 0  | 16 |
| 100% | 100% | 1  | 3  |
| 100% | 64%  | 0  | 1  |
| 100% | 100% | 2  | 3  |
| 100% | 0    | 0  | 3  |
| 100% | 100% | 0  | 2  |
| 100% | 100% | 0  | 4  |
| 67%  | 99%  | 0  | 1  |
| 100% | 100% | 1  | 8  |
| 100% | 100% | 0  | 2  |

|      |      |    |    |
|------|------|----|----|
| 100% | 0    | 0  | 2  |
| 100% | 100% | 1  | 3  |
| 100% | 0    | 0  | 2  |
| 100% | 100% | 5  | 9  |
| 100% | 69%  | 1  | 1  |
| 100% | 100% | 0  | 2  |
| 100% | 100% | 2  | 5  |
| 100% | 100% | 1  | 2  |
| 100% | 100% | 0  | 2  |
| 100% | 100% | 4  | 7  |
| 67%  | 100% | 0  | 1  |
| 100% | 100% | 1  | 3  |
| 100% | 100% | 5  | 6  |
| 100% | 100% | 1  | 5  |
| 100% | 100% | 4  | 6  |
| 100% | 0    | 1  | 2  |
| 100% | 0    | 1  | 3  |
| 0    | 100% | 0  | 0  |
| 100% | 100% | 0  | 2  |
| 100% | 100% | 1  | 2  |
| 100% | 69%  | 3  | 3  |
| 100% | 69%  | 0  | 2  |
| 100% | 100% | 10 | 12 |
| 100% | 100% | 9  | 8  |
| 100% | 100% | 2  | 2  |
| 100% | 100% | 1  | 6  |
| 100% | 100% | 1  | 3  |
| 100% | 100% | 4  | 6  |
| 100% | 69%  | 0  | 2  |
| 100% | 100% | 5  | 9  |
| 100% | 100% | 1  | 3  |
| 67%  | 100% | 0  | 1  |
| 100% | 100% | 0  | 2  |
| 100% | 0    | 0  | 3  |
| 100% | 100% | 1  | 2  |
| 100% | 100% | 21 | 21 |
| 100% | 100% | 1  | 6  |
| 0    | 100% | 5  | 0  |
| 100% | 69%  | 2  | 2  |
| 100% | 0    | 1  | 2  |
| 100% | 100% | 4  | 6  |
| 100% | 0    | 0  | 2  |
| 100% | 100% | 0  | 16 |
| 100% | 100% | 6  | 7  |
| 100% | 100% | 13 | 16 |
| 100% | 100% | 3  | 3  |
| 100% | 100% | 4  | 2  |
| 100% | 100% | 1  | 5  |
| 67%  | 100% | 0  | 1  |
| 100% | 100% | 3  | 3  |
| 100% | 69%  | 0  | 2  |
| 100% | 100% | 0  | 2  |
| 67%  | 100% | 0  | 1  |
| 100% | 100% | 2  | 4  |
| 100% | 100% | 13 | 13 |
| 100% | 100% | 13 | 17 |
| 100% | 100% | 1  | 2  |
| 100% | 100% | 9  | 17 |
| 0    | 100% | 1  | 0  |
| 100% | 69%  | 0  | 2  |
| 100% | 100% | 17 | 21 |
| 100% | 100% | 9  | 15 |
| 100% | 100% | 9  | 8  |

|      |      |    |    |
|------|------|----|----|
| 100% | 100% | 9  | 7  |
| 100% | 69%  | 1  | 2  |
| 99%  | 42%  | 2  | 1  |
| 100% | 100% | 5  | 6  |
| 99%  | 99%  | 1  | 1  |
| 100% | 100% | 9  | 11 |
| 100% | 100% | 10 | 13 |
| 100% | 100% | 0  | 2  |
| 100% | 100% | 2  | 3  |
| 67%  | 69%  | 2  | 1  |
| 100% | 100% | 3  | 2  |
| 100% | 69%  | 1  | 2  |
| 67%  | 100% | 1  | 1  |
| 100% | 100% | 5  | 8  |
| 100% | 100% | 20 | 21 |
| 100% | 0    | 0  | 6  |
| 0    | 100% | 0  | 0  |
| 100% | 0    | 1  | 2  |
| 100% | 100% | 0  | 5  |
| 100% | 100% | 2  | 8  |
| 100% | 100% | 0  | 3  |
| 100% | 0    | 0  | 2  |
| 100% | 69%  | 2  | 2  |
| 67%  | 100% | 1  | 1  |
| 100% | 100% | 3  | 5  |
| 100% | 69%  | 0  | 2  |
| 100% | 100% | 10 | 11 |
| 100% | 100% | 8  | 9  |
| 100% | 100% | 1  | 3  |
| 100% | 0    | 0  | 2  |
| 100% | 0    | 0  | 1  |
| 100% | 100% | 0  | 3  |
| 100% | 100% | 0  | 1  |
| 100% | 100% | 2  | 4  |
| 0    | 100% | 1  | 0  |
| 100% | 100% | 2  | 2  |
| 100% | 100% | 12 | 12 |
| 100% | 100% | 4  | 8  |
| 100% | 100% | 6  | 5  |
| 100% | 100% | 0  | 4  |
| 100% | 100% | 4  | 4  |
| 100% | 100% | 4  | 4  |
| 100% | 100% | 2  | 7  |
| 0    | 100% | 4  | 0  |
| 67%  | 100% | 0  | 1  |
| 100% | 0    | 1  | 2  |
| 100% | 100% | 1  | 3  |
| 100% | 100% | 2  | 3  |
| 99%  | 0    | 0  | 1  |
| 100% | 100% | 1  | 4  |
| 100% | 100% | 3  | 6  |
| 100% | 100% | 6  | 16 |
| 100% | 100% | 3  | 3  |
| 100% | 69%  | 3  | 2  |
| 100% | 100% | 3  | 4  |
| 100% | 69%  | 2  | 2  |
| 100% | 100% | 3  | 4  |
| 100% | 100% | 1  | 4  |
| 100% | 100% | 1  | 2  |
| 100% | 100% | 2  | 6  |
| 100% | 100% | 2  | 4  |
| 100% | 100% | 2  | 2  |
| 67%  | 100% | 1  | 1  |

|      |      |    |    |
|------|------|----|----|
| 100% | 69%  | 0  | 3  |
| 100% | 69%  | 1  | 3  |
| 0    | 31%  | 1  | 0  |
| 100% | 100% | 2  | 2  |
| 100% | 100% | 1  | 2  |
| 67%  | 100% | 0  | 1  |
| 67%  | 100% | 1  | 1  |
| 100% | 100% | 1  | 2  |
| 100% | 69%  | 1  | 2  |
| 67%  | 100% | 1  | 1  |
| 100% | 0    | 9  | 6  |
| 100% | 100% | 6  | 6  |
| 100% | 100% | 8  | 10 |
| 100% | 100% | 3  | 4  |
| 100% | 0    | 0  | 2  |
| 100% | 100% | 1  | 5  |
| 100% | 100% | 1  | 2  |
| 0    | 100% | 8  | 0  |
| 100% | 0    | 8  | 12 |
| 100% | 100% | 0  | 5  |
| 67%  | 100% | 0  | 1  |
| 100% | 0    | 0  | 3  |
| 100% | 100% | 0  | 2  |
| 100% | 100% | 10 | 16 |
| 100% | 0    | 0  | 2  |
| 67%  | 99%  | 1  | 1  |
| 0    | 0    | 2  | 0  |
| 100% | 100% | 1  | 2  |
| 67%  | 69%  | 2  | 1  |
| 100% | 100% | 2  | 2  |
| 100% | 0    | 6  | 5  |
| 100% | 69%  | 3  | 2  |
| 100% | 100% | 0  | 3  |
| 100% | 100% | 1  | 2  |
| 0    | 0    | 2  | 0  |
| 100% | 100% | 3  | 6  |
| 0    | 100% | 0  | 0  |
| 67%  | 100% | 1  | 1  |
| 67%  | 100% | 1  | 1  |
| 67%  | 100% | 1  | 1  |
| 67%  | 100% | 1  | 1  |
| 100% | 100% | 2  | 2  |
| 100% | 100% | 2  | 3  |
| 100% | 0    | 1  | 2  |
| 67%  | 100% | 0  | 1  |
| 100% | 100% | 1  | 3  |
| 100% | 100% | 1  | 1  |
| 98%  | 0    | 0  | 1  |
| 100% | 0    | 1  | 2  |
| 100% | 0    | 2  | 2  |
| 67%  | 100% | 0  | 1  |
| 98%  | 0    | 0  | 1  |
| 100% | 100% | 0  | 3  |
| 100% | 100% | 2  | 3  |
| 100% | 100% | 0  | 2  |
| 100% | 100% | 3  | 3  |
| 100% | 69%  | 2  | 2  |
| 67%  | 100% | 0  | 1  |
| 100% | 100% | 1  | 2  |
| 0    | 100% | 0  | 0  |
| 100% | 69%  | 2  | 2  |
| 100% | 99%  | 1  | 2  |
| 100% | 69%  | 0  | 2  |

|      |      |    |    |
|------|------|----|----|
| 100% | 69%  | 1  | 2  |
| 98%  | 69%  | 0  | 1  |
| 100% | 100% | 0  | 2  |
| 100% | 69%  | 2  | 5  |
| 67%  | 69%  | 2  | 1  |
| 100% | 100% | 6  | 6  |
| 100% | 100% | 2  | 3  |
| 67%  | 100% | 1  | 1  |
| 100% | 69%  | 1  | 3  |
| 98%  | 69%  | 0  | 1  |
| 100% | 100% | 1  | 2  |
| 100% | 69%  | 1  | 1  |
| 100% | 69%  | 2  | 2  |
| 100% | 100% | 0  | 2  |
| 100% | 100% | 0  | 5  |
| 100% | 100% | 2  | 3  |
| 100% | 100% | 1  | 3  |
| 100% | 100% | 0  | 3  |
| 0    | 100% | 0  | 0  |
| 100% | 0    | 5  | 10 |
| 100% | 100% | 2  | 4  |
| 100% | 100% | 1  | 2  |
| 0    | 100% | 0  | 0  |
| 100% | 69%  | 0  | 2  |
| 100% | 100% | 8  | 8  |
| 100% | 100% | 0  | 2  |
| 67%  | 98%  | 2  | 1  |
| 100% | 100% | 1  | 2  |
| 67%  | 99%  | 0  | 1  |
| 100% | 100% | 42 | 35 |
| 100% | 100% | 17 | 15 |
| 100% | 100% | 5  | 3  |
| 100% | 69%  | 1  | 3  |
| 100% | 100% | 2  | 3  |
| 100% | 0    | 0  | 2  |
| 100% | 100% | 4  | 4  |
| 100% | 69%  | 0  | 2  |
| 100% | 100% | 1  | 2  |
| 100% | 100% | 5  | 12 |
| 11%  | 100% | 0  | 0  |
| 100% | 0    | 0  | 5  |
| 0    | 100% | 0  | 0  |
| 100% | 100% | 3  | 4  |
| 100% | 100% | 14 | 15 |
| 100% | 100% | 3  | 4  |
| 100% | 100% | 3  | 4  |
| 100% | 100% | 0  | 9  |
| 100% | 69%  | 0  | 2  |
| 67%  | 100% | 2  | 1  |
| 100% | 100% | 4  | 7  |
| 67%  | 100% | 1  | 1  |
| 100% | 100% | 1  | 4  |
| 100% | 100% | 2  | 8  |
| 0    | 100% | 2  | 0  |
| 100% | 0    | 0  | 3  |
| 99%  | 100% | 2  | 1  |
| 100% | 69%  | 1  | 2  |
| 100% | 100% | 3  | 2  |
| 100% | 100% | 7  | 9  |
| 100% | 100% | 4  | 4  |
| 100% | 100% | 3  | 3  |
| 67%  | 100% | 1  | 1  |
| 100% | 100% | 3  | 2  |

|      |      |    |    |
|------|------|----|----|
| 100% | 100% | 2  | 2  |
| 100% | 0    | 1  | 4  |
| 100% | 0    | 0  | 4  |
| 100% | 100% | 0  | 3  |
| 100% | 69%  | 0  | 2  |
| 100% | 100% | 0  | 2  |
| 12%  | 100% | 0  | 0  |
| 100% | 100% | 1  | 4  |
| 100% | 100% | 1  | 2  |
| 67%  | 0    | 2  | 1  |
| 100% | 100% | 0  | 7  |
| 0    | 100% | 0  | 0  |
| 67%  | 99%  | 1  | 1  |
| 67%  | 99%  | 2  | 1  |
| 100% | 100% | 6  | 8  |
| 67%  | 100% | 1  | 1  |
| 67%  | 100% | 1  | 1  |
| 100% | 100% | 1  | 2  |
| 100% | 100% | 1  | 4  |
| 67%  | 100% | 1  | 1  |
| 100% | 100% | 3  | 3  |
| 100% | 100% | 2  | 2  |
| 100% | 100% | 3  | 3  |
| 100% | 99%  | 1  | 2  |
| 100% | 0    | 0  | 2  |
| 100% | 69%  | 0  | 2  |
| 100% | 100% | 3  | 3  |
| 100% | 100% | 1  | 2  |
| 67%  | 100% | 0  | 1  |
| 100% | 100% | 0  | 3  |
| 100% | 69%  | 0  | 2  |
| 100% | 100% | 14 | 14 |
| 100% | 100% | 12 | 22 |
| 100% | 100% | 7  | 13 |
| 100% | 69%  | 0  | 3  |
| 0    | 100% | 1  | 0  |
| 67%  | 100% | 0  | 1  |
| 100% | 69%  | 0  | 2  |
| 100% | 99%  | 3  | 2  |
| 100% | 100% | 4  | 7  |
| 100% | 100% | 2  | 3  |
| 100% | 100% | 1  | 2  |
| 100% | 100% | 2  | 5  |
| 100% | 0    | 8  | 9  |
| 100% | 100% | 3  | 1  |
| 23%  | 100% | 0  | 0  |
| 100% | 100% | 4  | 4  |
| 100% | 99%  | 0  | 2  |
| 100% | 100% | 2  | 4  |
| 100% | 100% | 0  | 2  |
| 100% | 100% | 8  | 14 |
| 0    | 99%  | 0  | 0  |
| 0    | 0    | 1  | 0  |
| 100% | 69%  | 2  | 2  |
| 100% | 100% | 7  | 7  |
| 100% | 100% | 6  | 12 |
| 100% | 100% | 2  | 2  |
| 100% | 100% | 3  | 9  |
| 67%  | 100% | 2  | 1  |
| 100% | 69%  | 1  | 2  |
| 100% | 69%  | 2  | 3  |
| 100% | 100% | 1  | 2  |
| 100% | 0    | 2  | 3  |

|      |      |    |    |
|------|------|----|----|
| 100% | 100% | 0  | 2  |
| 100% | 100% | 2  | 12 |
| 100% | 100% | 4  | 5  |
| 100% | 100% | 1  | 2  |
| 100% | 69%  | 1  | 2  |
| 100% | 100% | 3  | 2  |
| 100% | 100% | 5  | 2  |
| 100% | 100% | 15 | 17 |
| 100% | 100% | 2  | 4  |
| 100% | 100% | 1  | 5  |
| 100% | 100% | 3  | 3  |
| 100% | 100% | 0  | 2  |
| 100% | 100% | 10 | 9  |
| 100% | 100% | 6  | 10 |
| 100% | 0    | 0  | 2  |
| 100% | 69%  | 0  | 3  |
| 100% | 100% | 0  | 3  |
| 99%  | 69%  | 0  | 1  |
| 100% | 100% | 0  | 2  |
| 100% | 100% | 9  | 8  |
| 100% | 100% | 12 | 12 |
| 100% | 100% | 9  | 9  |
| 100% | 100% | 9  | 9  |
| 100% | 100% | 0  | 2  |
| 100% | 100% | 0  | 5  |
| 100% | 100% | 2  | 6  |
| 100% | 100% | 1  | 3  |
| 100% | 0    | 0  | 2  |
| 100% | 69%  | 1  | 3  |
| 100% | 100% | 2  | 2  |
| 67%  | 100% | 11 | 1  |
| 100% | 100% | 1  | 15 |
| 100% | 100% | 1  | 2  |
| 100% | 100% | 4  | 4  |
| 100% | 100% | 21 | 17 |
| 100% | 69%  | 0  | 3  |
| 100% | 0    | 0  | 2  |
| 100% | 100% | 4  | 5  |
| 67%  | 69%  | 2  | 1  |
| 100% | 100% | 1  | 5  |
| 100% | 100% | 1  | 2  |
| 93%  | 98%  | 0  | 0  |
| 67%  | 100% | 1  | 1  |
| 100% | 100% | 0  | 2  |
| 100% | 100% | 3  | 4  |
| 67%  | 69%  | 1  | 1  |
| 100% | 100% | 1  | 5  |
| 100% | 69%  | 0  | 2  |
| 100% | 69%  | 0  | 2  |
| 100% | 69%  | 2  | 2  |
| 100% | 100% | 0  | 2  |
| 100% | 100% | 0  | 2  |
| 100% | 0    | 0  | 2  |
| 100% | 100% | 11 | 11 |
| 99%  | 0    | 0  | 1  |
| 100% | 100% | 0  | 2  |
| 100% | 100% | 0  | 5  |
| 100% | 100% | 15 | 18 |
| 100% | 0    | 0  | 2  |
| 100% | 100% | 4  | 4  |
| 100% | 100% | 5  | 7  |
| 100% | 98%  | 0  | 2  |
| 100% | 69%  | 1  | 2  |

|      |      |    |    |
|------|------|----|----|
| 99%  | 43%  | 0  | 1  |
| 100% | 100% | 2  | 2  |
| 100% | 100% | 1  | 2  |
| 99%  | 0    | 0  | 1  |
| 98%  | 69%  | 0  | 1  |
| 100% | 100% | 8  | 19 |
| 100% | 100% | 22 | 19 |
| 100% | 100% | 5  | 9  |
| 99%  | 100% | 1  | 1  |
| 67%  | 100% | 2  | 1  |
| 100% | 0    | 1  | 2  |
| 100% | 53%  | 1  | 5  |
| 100% | 100% | 1  | 3  |
| 100% | 100% | 8  | 12 |
| 100% | 100% | 12 | 13 |
| 100% | 0    | 5  | 5  |
| 100% | 69%  | 1  | 2  |
| 100% | 100% | 6  | 8  |
| 100% | 100% | 1  | 5  |
| 100% | 100% | 2  | 1  |
| 100% | 100% | 9  | 10 |
| 67%  | 100% | 0  | 1  |
| 100% | 0    | 0  | 2  |



| # Unique peptide H1688-Rep3 (C | # Unique peptide Control | IPI                                    | SwissProt      |
|--------------------------------|--------------------------|----------------------------------------|----------------|
| 2                              | 0                        | IPI00797738                            |                |
| 3                              | 0                        | IPI00795717                            |                |
| 2                              | 0                        | IPI00478011                            |                |
| 4                              | 0                        | IPI00647593                            |                |
| 0                              | 0                        | IPI00472119                            |                |
| 0                              | 0                        | IPI00795769                            |                |
| 15                             | 0                        | IPI00783641                            |                |
| 2                              | 0                        | IPI00785057                            | Q5IRN2         |
| 3                              | 0                        | IPI00384863                            | Q9UP43         |
| 9                              | 0                        | IPI00382617                            | P07029,        |
| 0                              | 0                        | IPI00789847                            |                |
| 1                              | 0                        | IPI00169276                            | P17538         |
| 4                              | 0                        | IPI00784131                            | P49588         |
| 1                              | 0                        | IPI00013495,IPI00302146,IPI00792186    | Q8NE71         |
| 2                              | 0                        | IPI00063827                            | Q96IU4,        |
| 1                              | 0                        | IPI00020982,IPI00219832                | P19801         |
| 2                              | 0                        | IPI00440499                            | P35610         |
| 1                              | 0                        | IPI00009315                            | Q9H3P7,        |
| 2                              | 0                        | IPI00437751                            | P12821,        |
| 3                              | 0                        | IPI00007334                            | Q9UKV3,        |
| 3                              | 0                        | IPI00021290,IPI00394838                | P53396,        |
| 1                              | 0                        | IPI00219451,IPI00395469,IPI00413603    | O00154         |
| 4                              | 0                        | IPI00419240                            | P13686,        |
| 2                              | 0                        | IPI00021428,IPI00023006                | P68032,P68133, |
| 10                             | 0                        | IPI00021439,IPI00021440                | P60709,P63261, |
| 3                              | 0                        | IPI00759776                            | P12814         |
| 20                             | 0                        | IPI00013808                            | O43707,        |
| 4                              | 0                        | IPI00028091                            | P61158,        |
| 2                              | 0                        | IPI00013897                            | O14672,        |
| 4                              | 0                        | IPI00420069                            | Q13444         |
| 0                              | 0                        | IPI00029606,IPI00288894                | P78536         |
| 2                              | 0                        | IPI00440932,IPI00747759                | Q13443,        |
| 0                              | 0                        | IPI00790458                            | Q86TH1         |
| 0                              | 0                        | IPI00025057,IPI00025058,IPI00394665    | P55265         |
| 3                              | 0                        | IPI00394668                            | P55265,        |
| 1                              | 0                        | IPI00000027                            | P18509,        |
| 11                             | 0                        | IPI00032220                            | P01019,        |
| 5                              | 0                        | IPI00012007                            | P23526,        |
| 1                              | 0                        | IPI00030706                            | O95433,        |
| 1                              | 0                        | IPI00000690,IPI00157908                | O95831,        |
| 5                              | 0                        | IPI00215901,IPI00218988                | P54819         |
| 6                              | 0                        | IPI00220271                            | P14550,        |
| 0                              | 0                        | IPI00413641,IPI00556258                | P15121,        |
| 7                              | 0                        | IPI00105407                            | O60218,        |
| 11                             | 0                        | IPI00029733                            | Q04828,        |
| 7                              | 0                        | IPI00291483                            | P42330,        |
| 3                              | 0                        | IPI00305978                            | O43488,        |
| 2                              | 0                        | IPI00293721                            | O95154,        |
| 2                              | 0                        | IPI00015102,IPI00783803,IPI00795504,IP | Q13740,        |
| 14                             | 0                        | IPI00218914                            | P00352,        |
| 3                              | 0                        | IPI00333619,IPI00394758                | P51648         |
| 2                              | 0                        | IPI00479877                            | P49189,        |
| 14                             | 1                        | IPI00465439                            | P04075,        |
| 4                              | 0                        | IPI00418262                            | P09972,        |
| 7                              | 0                        | IPI00022426                            | P02760,        |
| 8                              | 0                        | IPI00025849,IPI00449263                | P39687,        |
| 1                              | 0                        | IPI00007423,IPI00759824                | Q92688,        |
| 4                              | 0                        | IPI00165393,IPI00640833                | Q9BTT0,        |
| 3                              | 0                        | IPI00329801                            | P08758,        |
| 0                              | 0                        | IPI00411453,IPI00477622,IPI00719680    | O14617         |

|    |   |                                        |         |
|----|---|----------------------------------------|---------|
| 2  | 0 | IPI00337741,IPI00794973                | P13798, |
| 8  | 0 | IPI00215911                            | P27695, |
| 1  | 0 | IPI00006684,IPI00554742,IPI00555572    | Q9BZZ5, |
| 9  | 0 | IPI00031030,IPI00220978                | Q06481  |
| 8  | 0 | IPI00168479                            | Q8NCW5  |
| 14 | 0 | IPI00006608,IPI00219187,IPI00412681,IP | P05067  |
| 3  | 0 | IPI00514053                            | P48444, |
| 3  | 0 | IPI00215914                            | P84077, |
| 1  | 0 | IPI00216520                            | P53367, |
| 2  | 0 | IPI00796541                            | P52565  |
| 4  | 0 | IPI00328748                            | P55145, |
| 2  | 0 | IPI00329685,IPI00744184                | P15289, |
| 0  | 0 | IPI00165949,IPI00477831                | Q9NZ08, |
| 3  | 0 | IPI00420014                            | O75643, |
| 1  | 0 | IPI00024572,IPI00032450,IPI00294834,IP | Q12797, |
| 1  | 0 | IPI00555734                            | Q8NI34  |
| 2  | 0 | IPI00020632                            | P00966, |
| 2  | 0 | IPI00289499                            | P31939, |
| 0  | 0 | IPI00747443                            | P16615  |
| 7  | 0 | IPI00440493                            | P25705, |
| 7  | 0 | IPI00303476                            | P06576, |
| 2  | 0 | IPI00002521,IPI00456008                | P18859, |
| 2  | 0 | IPI00020430,IPI00784119,IPI00794988    | Q15904, |
| 1  | 0 | IPI00168884,IPI00828107                | O75787, |
| 1  | 0 | IPI00007682                            | P38606, |
| 9  | 0 | IPI00641829                            | Q13838, |
| 1  | 0 | IPI00027235,IPI00478671                | O75882, |
| 6  | 0 | IPI00166729                            | P25311, |
| 1  | 0 | IPI00004656,IPI00796379                | P61769, |
| 2  | 0 | IPI00064848                            | Q96L58, |
| 2  | 0 | IPI00304331,IPI00477470                | O94766, |
| 2  | 0 | IPI00009997                            | O43505, |
| 2  | 0 | IPI00746600                            | O60512  |
| 2  | 0 | IPI00000643                            | O95816, |
| 2  | 0 | IPI00026087                            | O75531, |
| 0  | 0 | IPI00010700,IPI00642817                | P48634  |
| 2  | 0 | IPI00006079,IPI00413671,IPI00413672    | Q9NYF8, |
| 2  | 0 | IPI00301434                            | Q9H3K6, |
| 3  | 0 | IPI00410214                            | O95861, |
| 1  | 0 | IPI00013468                            | O43684, |
| 2  | 0 | IPI00003419                            | O00193  |
| 1  | 0 | IPI00064212                            | Q96JM3, |
| 0  | 0 | IPI00292150                            | Q14767, |
| 0  | 0 | IPI00009922                            | Q9GZT3, |
| 2  | 0 | IPI00006980,IPI00792100                | Q9Y224, |
| 3  | 0 | IPI00056357                            | Q969H8, |
| 0  | 0 | IPI00014230                            | Q07021, |
| 1  | 0 | IPI00005918                            | Q9UHK6, |
| 2  | 0 | IPI00024913,IPI00218482,IPI00784162,IP | P30042  |
| 0  | 0 | IPI00550689                            | Q9Y3I0, |
| 4  | 0 | IPI00152148                            | Q8TB73  |
| 0  | 0 | IPI00816741                            | Q14CJ0  |
| 2  | 0 | IPI00007926,IPI00395835                | O43598, |
| 3  | 0 | IPI00395627,IPI00552308,IPI00745851    | Q9HB71, |
| 8  | 0 | IPI00000914                            | P01258, |
| 2  | 0 | IPI00075248,IPI00386621,IPI00794543    | P62158, |
| 11 | 0 | IPI00020599                            | P27797, |
| 1  | 0 | IPI00014537,IPI00045396,IPI00789155    | O43852  |
| 2  | 0 | IPI00172636,IPI00430291,IPI00827573,IP | Q13557, |
| 14 | 0 | IPI00100160                            | Q86VP6, |
| 9  | 0 | IPI00103175                            | Q8WVQ1, |
| 9  | 0 | IPI00020984                            | P27824, |
| 2  | 0 | IPI00008274                            | Q01518, |

|    |   |                                        |         |
|----|---|----------------------------------------|---------|
| 4  | 0 | IPI00005969                            | P52907, |
| 0  | 0 | IPI00026182                            | P47755, |
| 3  | 0 | IPI00026185,IPI00218782,IPI00642256    | P47756  |
| 1  | 0 | IPI00304409                            | Q9Y2V2  |
| 2  | 0 | IPI00027443                            | P49589  |
| 7  | 0 | IPI00295386                            | P16152, |
| 3  | 0 | IPI00010320                            | P83916, |
| 2  | 0 | IPI00297579                            | Q13185, |
| 4  | 0 | IPI00024662                            | P45973, |
| 2  | 0 | IPI00217357                            | Q8IX12, |
| 1  | 0 | IPI00797903                            | Q86WR0  |
| 6  | 0 | IPI00297779                            | P78371, |
| 3  | 0 | IPI00290770,IPI00552715,IPI00553185,IP | P49368, |
| 6  | 0 | IPI00302927                            | P50991, |
| 4  | 0 | IPI00010720                            | P48643, |
| 5  | 0 | IPI00027626                            | P40227, |
| 2  | 0 | IPI00018465                            | Q99832, |
| 9  | 0 | IPI00302925,IPI00784090                | P50990, |
| 2  | 0 | IPI00215997,IPI00657796,IPI00795937    | P21926, |
| 2  | 0 | IPI00007189                            | P60953, |
| 2  | 0 | IPI00465294                            | Q99459, |
| 0  | 0 | IPI00025861                            | P12830, |
| 13 | 0 | IPI00290089                            | Q12864, |
| 6  | 0 | IPI00290085                            | P19022, |
| 8  | 0 | IPI00027486                            | P06731, |
| 17 | 0 | IPI00099670                            | P19835, |
| 7  | 0 | IPI00012011                            | P23528, |
| 0  | 0 | IPI00333010                            | Q8IWX8  |
| 14 | 0 | IPI00746813                            | P10645  |
| 23 | 0 | IPI00006601                            | P05060, |
| 5  | 0 | IPI00301185,IPI00306719                | Q9BWS9  |
| 5  | 0 | IPI00099831                            | Q9NPF2, |
| 2  | 0 | IPI00641579                            | Q14011  |
| 12 | 0 | IPI00022977                            | P12277, |
| 6  | 0 | IPI00658109                            | P12532, |
| 4  | 0 | IPI00010896                            | O00299, |
| 2  | 0 | IPI00291930,IPI00397519                | Q14677, |
| 17 | 0 | IPI00007257                            | O94985  |
| 6  | 0 | IPI00005491                            | Q9H4D0, |
| 5  | 0 | IPI00396423,IPI00747063                | Q9BQT9, |
| 18 | 0 | IPI00455383                            | Q00610, |
| 5  | 0 | IPI00291262,IPI00400826,IPI00795633    | P10909, |
| 4  | 0 | IPI00219953                            | P30085, |
| 1  | 0 | IPI00430812                            | P62633, |
| 3  | 0 | IPI00165579                            | Q96KP4  |
| 6  | 0 | IPI00012386,IPI00791735                | O43405, |
| 5  | 0 | IPI00295857                            | P53621, |
| 5  | 0 | IPI00295851                            | P53618, |
| 2  | 0 | IPI00220219                            | P35606, |
| 0  | 0 | IPI00399318                            | A6NE29  |
| 0  | 0 | IPI00001890,IPI00783982                | Q9Y678, |
| 1  | 0 | IPI00007058                            | Q9BR76, |
| 5  | 0 | IPI00008453                            | Q9ULV4, |
| 2  | 0 | IPI00017704                            | Q14019, |
| 3  | 0 | IPI00025086                            | P20674, |
| 3  | 0 | IPI00027078                            | O75976, |
| 18 | 0 | IPI00031121                            | P16870, |
| 2  | 0 | IPI00550308                            | Q9NTZ6, |
| 0  | 0 | IPI00026219                            | Q10570, |
| 0  | 0 | IPI00419531                            | Q9P2I0, |
| 2  | 0 | IPI00021997                            | O75629, |
| 3  | 0 | IPI00006034                            | P52943, |
| 2  | 0 | IPI00305469,IPI00399054                | P46108, |

|   |   |                                        |         |
|---|---|----------------------------------------|---------|
| 3 | 0 | IPI00004839                            | P46109, |
| 1 | 0 | IPI00000792,IPI00641565,IPI00647366    | Q08257, |
| 4 | 0 | IPI00025366                            | O75390, |
| 2 | 0 | IPI00741317                            | P68400  |
| 6 | 0 | IPI00442073                            | P21291, |
| 3 | 0 | IPI00021828                            | P04080, |
| 2 | 0 | IPI00011528,IPI00644499                | Q05048, |
| 0 | 0 | IPI00013256,IPI00607841                | P33240  |
| 0 | 0 | IPI00006122,IPI00515009                | O15320  |
| 0 | 0 | IPI00060423                            | Q96CG8, |
| 1 | 0 | IPI00215948                            | P35221, |
| 1 | 0 | IPI00017292                            | P35222, |
| 1 | 0 | IPI00182469,IPI00182540,IPI00219725,IP | O60716  |
| 6 | 0 | IPI00640525                            | P10619  |
| 4 | 0 | IPI00022810                            | P53634, |
| 9 | 0 | IPI00011229                            | P07339, |
| 0 | 0 | IPI00029601                            | Q14247, |
| 4 | 0 | IPI00034319,IPI00554556,IPI00554634    | O60888  |
| 2 | 0 | IPI00303954                            | O43169, |
| 2 | 0 | IPI00465315                            | P99999, |
| 2 | 0 | IPI00644231,IPI00791837                | Q7L576  |
| 7 | 0 | IPI00028911                            | Q14118, |
| 0 | 0 | IPI00165230,IPI00335930                | Q96EP5  |
| 3 | 0 | IPI00010182,IPI00218836,IPI00815745    | P07108  |
| 0 | 0 | IPI00003406,IPI00295624                | Q16643, |
| 2 | 0 | IPI00300567                            | P42126, |
| 3 | 0 | IPI00220342                            | O94760, |
| 4 | 0 | IPI00293464,IPI00784120,IPI00786914    | Q16531, |
| 5 | 0 | IPI00025394                            | P20711, |
| 4 | 0 | IPI00001477,IPI00219996,IPI00657861    | Q08345  |
| 2 | 0 | IPI00293867                            | P30046, |
| 2 | 0 | IPI00293655                            | Q92499, |
| 1 | 0 | IPI00023785,IPI00651677                | Q92841  |
| 0 | 0 | IPI00651653                            | Q92841, |
| 3 | 0 | IPI00015953                            | Q9NR30, |
| 3 | 0 | IPI00829889                            | Q86XP3  |
| 2 | 0 | IPI00329791                            | Q7L014, |
| 5 | 0 | IPI00017617                            | P17844, |
| 2 | 0 | IPI00003482                            | Q16698, |
| 1 | 0 | IPI00020021                            | P35659, |
| 1 | 0 | IPI00396435                            | O43143, |
| 5 | 0 | IPI00742905                            | Q08211  |
| 2 | 0 | IPI00619921                            | Q9BTC0, |
| 1 | 0 | IPI00221394                            | O60832, |
| 1 | 0 | IPI00398918                            | Q68D85  |
| 3 | 0 | IPI00015911                            | P09622, |
| 1 | 0 | IPI00030351,IPI00218729,IPI00552213,IP | Q12959, |
| 3 | 0 | IPI00015947                            | P25685, |
| 5 | 0 | IPI00008454                            | Q9UBS4, |
| 0 | 0 | IPI00293260                            | Q8IXB1  |
| 0 | 0 | IPI00006713                            | Q13217, |
| 0 | 0 | IPI00003438                            | O75937, |
| 1 | 0 | IPI00010348                            | O00115, |
| 2 | 0 | IPI00037283                            | O00429, |
| 0 | 0 | IPI00033022,IPI00181352,IPI00218889,IP | P50570  |
| 3 | 0 | IPI00025846,IPI00220146                | Q02487  |
| 7 | 0 | IPI00028931                            | Q14126, |
| 2 | 0 | IPI00013933                            | P15924, |
| 2 | 0 | IPI00473014                            | P60981, |
| 5 | 0 | IPI00477531                            | Q14204  |
| 0 | 0 | IPI00827859                            | Q13409  |
| 0 | 0 | IPI00019329                            | P63167, |
| 1 | 0 | IPI00024993                            | P30084, |

|    |   |                                                 |                |
|----|---|-------------------------------------------------|----------------|
| 17 | 0 | IPI00003351,IPI00645849                         | Q16610,        |
| 0  | 0 | IPI00396485,IPI00472724                         | P68104,        |
| 4  | 0 | IPI00178440                                     | P24534,        |
| 0  | 0 | IPI00064086                                     | P29692         |
| 2  | 0 | IPI00642971                                     |                |
| 2  | 0 | IPI00003588                                     | O43324,        |
| 7  | 0 | IPI00000875,IPI00747497                         | P26641,        |
| 14 | 0 | IPI00186290                                     | P13639,        |
| 2  | 0 | IPI00003519                                     | Q15029,        |
| 3  | 0 | IPI00021728,IPI00793912                         | P20042,        |
| 0  | 0 | IPI00033143                                     | Q9UBQ5,        |
| 1  | 0 | IPI00012795                                     | Q13347,        |
| 2  | 0 | IPI00647650                                     | O15372,        |
| 2  | 0 | IPI00290460                                     | O75821,        |
| 2  | 0 | IPI00013068                                     | P60228,        |
| 1  | 0 | IPI00465233                                     | Q9Y262         |
| 3  | 0 | IPI00016910,IPI00646839                         | Q99613,        |
| 2  | 0 | IPI00747447                                     | P55884         |
| 0  | 0 | IPI00025491                                     | P60842,        |
| 4  | 0 | IPI00328328,IPI00409717                         | Q14240,        |
| 0  | 0 | IPI00027485                                     | P06730,        |
| 0  | 0 | IPI00220365,IPI00384463,IPI00386533,IPI00000000 | Q04637         |
| 1  | 0 | IPI00015952                                     | P78344,        |
| 5  | 0 | IPI00376005,IPI00411704                         | P63241,        |
| 0  | 0 | IPI00299254                                     | O60841,        |
| 5  | 0 | IPI00301936                                     | Q15717,        |
| 0  | 0 | IPI00001466                                     | Q9HC35,        |
| 2  | 0 | IPI00374054                                     | Q8N8S7,        |
| 19 | 0 | IPI00465248                                     | P06733,        |
| 2  | 0 | IPI00216171                                     | P09104,        |
| 2  | 0 | IPI00038378,IPI00385140                         | Q9UHY7,        |
| 2  | 0 | IPI00470835                                     | Q68D48         |
| 2  | 0 | IPI00025295,IPI00478478,IPI00514953,IPI00000000 | O75354,        |
| 0  | 0 | IPI00009896                                     | P07099,        |
| 14 | 0 | IPI00013452                                     | P07814,        |
| 2  | 0 | IPI00029631                                     | P84090,        |
| 2  | 0 | IPI00386755                                     | Q96HE7,        |
| 7  | 0 | IPI00024911                                     | P30040,        |
| 0  | 0 | IPI00411706                                     | P10768,        |
| 4  | 0 | IPI00009841,IPI00065554                         | Q01844,        |
| 1  | 0 | IPI00019576,IPI00797559                         | P00742,        |
| 2  | 0 | IPI00607735,IPI00644969                         | Q8NFU3,        |
| 4  | 0 | IPI00001754,IPI00069985,IPI00294993             | Q9Y624,        |
| 9  | 2 | IPI00022937                                     | P12259         |
| 2  | 0 | IPI00790820                                     | P58499         |
| 2  | 0 | IPI00021923,IPI00334282                         | Q92520,        |
| 2  | 0 | IPI00303318,IPI00789253                         | Q9NUQ9,        |
| 3  | 0 | IPI00031820                                     | Q9Y285,        |
| 1  | 0 | IPI00300074                                     | Q9NSD9,        |
| 8  | 0 | IPI00645907                                     | P49327         |
| 3  | 0 | IPI00025039                                     | P22087,        |
| 5  | 0 | IPI00101405,IPI00797614                         | P14324,        |
| 1  | 0 | IPI00026215                                     | P39748,        |
| 3  | 0 | IPI00296053,IPI00759715                         | P07954         |
| 2  | 0 | IPI00396967,IPI00743342                         | Q14192,        |
| 1  | 0 | IPI00008449,IPI00395337,IPI00657863,IPI00000000 | Q6UN15,        |
| 3  | 0 | IPI00413778,IPI00647507                         | P62942,        |
| 6  | 0 | IPI00024157                                     | Q00688,        |
| 3  | 0 | IPI00219005                                     | Q02790,        |
| 5  | 0 | IPI00059292,IPI00219306                         | P61326,Q96A72, |
| 2  | 0 | IPI00167710                                     |                |
| 4  | 0 | IPI00302592,IPI00333541,IPI00644576             | P21333,        |
| 10 | 0 | IPI00480131                                     | O75369         |

|    |   |                                        |                |
|----|---|----------------------------------------|----------------|
| 3  | 0 | IPI00783128                            | Q14315         |
| 0  | 0 | IPI00215720,IPI00215721,IPI00215723,IP | Q06787,        |
| 3  | 0 | IPI00744362                            | Q68DP9         |
| 2  | 0 | IPI00015580,IPI00028718,IPI00607808,IP | Q5TON5         |
| 13 | 0 | IPI00329327                            | Q86XX4,        |
| 5  | 0 | IPI00021081,IPI00217070,IPI00217071    | P19883         |
| 1  | 0 | IPI00477747                            | Q6MZW2,        |
| 0  | 0 | IPI00788671                            | Q96AE4         |
| 1  | 0 | IPI00018387                            | P09958,        |
| 4  | 0 | IPI00260715                            | P35637,        |
| 2  | 0 | IPI00412643,IPI00786930                | O75494,        |
| 1  | 0 | IPI00016249,IPI00554715                | P51114         |
| 2  | 0 | IPI00012442                            | Q13283,        |
| 9  | 0 | IPI00216008,IPI00289800,IPI00760751    | P11413         |
| 7  | 0 | IPI00783446                            | P10253,        |
| 2  | 0 | IPI00008790                            | P54803,        |
| 2  | 0 | IPI00029605                            | P34059,        |
| 2  | 0 | IPI00004669                            | Q10471,        |
| 1  | 0 | IPI00328391                            | Q86SF2,        |
| 14 | 0 | IPI00472068                            | Q14697         |
| 11 | 2 | IPI00219018                            | P04406,        |
| 1  | 0 | IPI00465260,IPI00783097                | P41250,        |
| 8  | 0 | IPI00021807,IPI00759616                | P04062         |
| 17 | 0 | IPI00306140                            | P01275,        |
| 9  | 0 | IPI00215768                            | P48506,        |
| 2  | 0 | IPI00010090                            | P48507,        |
| 11 | 0 | IPI00306543                            | Q99988,        |
| 10 | 0 | IPI00031461                            | P50395,        |
| 2  | 0 | IPI00217952                            | Q06210,        |
| 9  | 0 | IPI00023728                            | Q92820,        |
| 1  | 0 | IPI00441344,IPI00441550,IPI00797646    | P16278,P16279, |
| 5  | 0 | IPI00220766                            | Q04760,        |
| 4  | 0 | IPI00007102                            | Q9HC38         |
| 2  | 0 | IPI00018236                            | P17900,        |
| 2  | 0 | IPI00412987,IPI00549557                | P60983,        |
| 0  | 0 | IPI00029079                            | P49915,        |
| 3  | 0 | IPI00641950                            | P63244,        |
| 2  | 0 | IPI00009305                            | P46926,        |
| 3  | 0 | IPI00012102                            | P15586,        |
| 4  | 0 | IPI00171411,IPI00759659,IPI00784293    | Q8NBJ4,        |
| 1  | 0 | IPI00743931                            | Q9H8Y8,        |
| 3  | 0 | IPI00219029                            | P17174,        |
| 4  | 0 | IPI00018206                            | P00505,        |
| 9  | 0 | IPI00015688                            | P35052,        |
| 5  | 0 | IPI00027497                            | P06744,        |
| 2  | 0 | IPI00030910,IPI00150961,IPI00639921,IP | Q14444,        |
| 0  | 0 | IPI00037448,IPI00550682                | Q9UBQ7,        |
| 4  | 0 | IPI00011722,IPI00218672,IPI00647318    | P07492         |
| 0  | 0 | IPI00218671                            | P07492,        |
| 4  | 0 | IPI00026314                            | P06396,        |
| 7  | 0 | IPI00016862                            | P00390,        |
| 3  | 0 | IPI00657682                            | P08263,        |
| 5  | 1 | IPI00219757                            | P09211,        |
| 4  | 0 | IPI00290416                            | Q9NTK5,        |
| 2  | 0 | IPI00021924                            | Q92522,        |
| 2  | 0 | IPI00018278,IPI00218448,IPI00555841    | P0C0S5,Q71UI9, |
| 4  | 0 | IPI00220994                            | Q9POM6,        |
| 1  | 0 | IPI00219038                            | P84243,        |
| 1  | 0 | IPI00745553                            | Q16775,        |
| 2  | 0 | IPI00021808                            | P12081,        |
| 6  | 0 | IPI00453476                            | Q6FHU2         |
| 10 | 0 | IPI00020956                            | P51858,        |
| 3  | 0 | IPI00007063                            | Q9Y3E1,        |

|    |   |                                        |                       |
|----|---|----------------------------------------|-----------------------|
| 3  | 0 | IPI00027851,IPI00829779                | P06865,               |
| 3  | 0 | IPI00012585                            | P07686,               |
| 4  | 0 | IPI00303174                            | Q93099,               |
| 4  | 0 | IPI00239077                            | P49773,               |
| 2  | 0 | IPI00000335                            | Q9BX68,               |
| 1  | 0 | IPI00024417,IPI00784470,IPI00788073,IP | O75146,               |
| 3  | 0 | IPI00021370,IPI00784038                | P61086,               |
| 1  | 0 | IPI00217468                            | P16401,               |
| 0  | 0 | IPI00217465                            | P16403,               |
| 1  | 0 | IPI00045109,IPI00219037                | P16104,Q96QV6,        |
| 1  | 0 | IPI00026272                            | P04908,               |
| 4  | 0 | IPI00018534,IPI00020101,IPI00152906,IP | O60814,P57053,P58870, |
| 0  | 0 | IPI00152785                            | P23527,               |
| 8  | 0 | IPI00453473                            | P62805,               |
| 4  | 0 | IPI00216457,IPI00339274                | Q16777,Q6F113,        |
| 3  | 0 | IPI00454695,IPI00746251                | Q6DN03,Q6DRA6,        |
| 4  | 0 | IPI00171611,IPI00719351                | Q71DI3,               |
| 4  | 0 | IPI00018246                            | P19367,               |
| 6  | 0 | IPI00760554                            | P10316,               |
| 0  | 0 | IPI00472112,IPI00472448                | P13746                |
| 0  | 0 | IPI00472138,IPI00655604,IPI00747198    | P10319,P30491,P30685, |
| 2  | 0 | IPI00472605                            | P30501,               |
| 2  | 0 | IPI00028160                            | P08397,               |
| 7  | 0 | IPI00419258                            | P09429,               |
| 2  | 0 | IPI00219097                            | P26583,               |
| 4  | 0 | IPI00217477,IPI00411540,IPI00640781,IP | O15347,               |
| 2  | 0 | IPI00384857                            | Q9UK76,               |
| 3  | 0 | IPI00011913                            | Q13151,               |
| 11 | 0 | IPI00215965,IPI00465365,IPI00797148    | P09651                |
| 18 | 1 | IPI00396378                            | P22626,               |
| 11 | 0 | IPI00419373                            | P51991,               |
| 3  | 0 | IPI00334587,IPI00334713,IPI00742926    | Q99729                |
| 0  | 0 | IPI00216592                            | P07910,               |
| 9  | 0 | IPI00477313                            | P07910,               |
| 4  | 0 | IPI00045498                            | O14979                |
| 5  | 0 | IPI00003881                            | P52597,               |
| 0  | 0 | IPI00013881                            | P31943,               |
| 1  | 0 | IPI00026230                            | P55795,               |
| 5  | 0 | IPI00013877,IPI00216493                | P31942                |
| 6  | 0 | IPI00807545                            | P61978                |
| 7  | 0 | IPI00027834                            | P14866,               |
| 6  | 0 | IPI00171903,IPI00383296                | P52272,               |
| 8  | 0 | IPI00012074                            | O43390,               |
| 8  | 0 | IPI00644079                            | Q00839,               |
| 2  | 0 | IPI00013070,IPI00167147                | Q9BUJ2                |
| 1  | 0 | IPI00456887,IPI00827583                | Q1KMD3                |
| 2  | 0 | IPI00296291,IPI00642238,IPI00744429    | Q5SSJ5                |
| 1  | 0 | IPI00218493                            | P00492,               |
| 29 | 0 | IPI00382470                            | P07900                |
| 11 | 0 | IPI00334775                            | P08238                |
| 28 | 0 | IPI00027230                            | P14625,               |
| 18 | 0 | IPI00304925,IPI00807640                | P08107,               |
| 2  | 0 | IPI00002966                            | P34932,               |
| 1  | 0 | IPI00295485,IPI00828021                | O95757,               |
| 19 | 0 | IPI00003362                            | P11021,               |
| 21 | 1 | IPI00003865                            | P11142,               |
| 12 | 0 | IPI00007765                            | P38646,               |
| 1  | 0 | IPI00025512                            | P04792,               |
| 17 | 0 | IPI00784154                            | P10809,               |
| 5  | 0 | IPI00220362                            | P61604,               |
| 8  | 0 | IPI00024284                            | P98160,               |
| 4  | 0 | IPI00514983,IPI00796127                | Q92598,               |
| 2  | 0 | IPI00383665                            | Q9BUP3,               |

|    |   |                                        |                |
|----|---|----------------------------------------|----------------|
| 12 | 0 | IPI0000877                             | Q9Y4L1,        |
| 1  | 0 | IPI00644127                            | P41252,        |
| 2  | 0 | IPI00790218                            | O75144         |
| 6  | 0 | IPI00027223                            | O75874,        |
| 3  | 0 | IPI00011107                            | P48735,        |
| 1  | 0 | IPI00220014                            | Q13907,        |
| 2  | 0 | IPI00289819                            | P11717,        |
| 13 | 2 | IPI00297284                            | P18065,        |
| 0  | 0 | IPI00556155                            | P17936         |
| 6  | 0 | IPI00291987                            | Q8WX77         |
| 0  | 0 | IPI00002316                            | Q9P0M4,        |
| 6  | 0 | IPI00005198                            | Q12905,        |
| 14 | 0 | IPI00298788,IPI00418313                | Q12906,Q12906, |
| 0  | 0 | IPI00219330                            | Q12906,        |
| 7  | 0 | IPI00009960,IPI00554469                | Q16891,        |
| 1  | 0 | IPI00020906                            | P29218,        |
| 1  | 0 | IPI00291510                            | P12268,        |
| 0  | 0 | IPI00005944                            | Q01101,        |
| 2  | 0 | IPI00007402,IPI00784008                | O95373,        |
| 4  | 0 | IPI00009342                            | P46940,        |
| 1  | 0 | IPI00375631                            | P05161,        |
| 2  | 0 | IPI00375446                            | Q9BY32         |
| 0  | 0 | IPI00014238                            | Q15046,        |
| 0  | 0 | IPI00060715                            | Q96CX2,        |
| 3  | 0 | IPI00082310                            | Q07666,        |
| 1  | 0 | IPI00641384                            | O15027,        |
| 4  | 0 | IPI00448751                            | A0MZ66         |
| 2  | 0 | IPI00012837                            | P33176,        |
| 1  | 0 | IPI00022296                            | P10721,        |
| 1  | 0 | IPI00394906,IPI00398708,IPI00472303,IP | Q07866         |
| 7  | 0 | IPI00002818,IPI00218137                | Q9UBX7,        |
| 3  | 0 | IPI00793215                            | Q9POG3         |
| 0  | 0 | IPI00002214,IPI00789457                | P52292,        |
| 6  | 0 | IPI00001639                            | Q14974,        |
| 10 | 0 | IPI00784347                            | P05783,        |
| 8  | 0 | IPI00479145                            | P08727,        |
| 8  | 0 | IPI00306959                            | P08729,        |
| 15 | 0 | IPI00554648                            | P05787,        |
| 14 | 0 | IPI00328753                            | Q86UP2,        |
| 15 | 0 | IPI00375294                            | P25391,        |
| 4  | 0 | IPI00013976                            | P07942,        |
| 1  | 0 | IPI00296922                            | P55268,        |
| 10 | 0 | IPI00298281                            | P11047,        |
| 2  | 0 | IPI00103994                            | Q9P2J5,        |
| 0  | 0 | IPI00010471                            | P13796,        |
| 10 | 0 | IPI00217966                            | P00338,        |
| 6  | 0 | IPI00219217                            | P07195,        |
| 2  | 0 | IPI00032491                            | Q9Y2U8,        |
| 4  | 0 | IPI00455739                            | Q8NES3,        |
| 12 | 0 | IPI00023673                            | Q08380,        |
| 7  | 0 | IPI00293303                            | Q99538,        |
| 2  | 0 | IPI00005686                            | Q9Y5X9,        |
| 4  | 0 | IPI00026530                            | P49257,        |
| 5  | 0 | IPI00009950                            | Q12907,        |
| 21 | 0 | IPI00216952                            | P02545,        |
| 11 | 0 | IPI00217975                            | P20700,        |
| 3  | 0 | IPI00009771                            | Q03252,        |
| 2  | 0 | IPI00169285                            |                |
| 0  | 0 | IPI00377047                            | Q6UXI0         |
| 2  | 0 | IPI00397808                            |                |
| 1  | 0 | IPI00456898                            |                |
| 2  | 0 | IPI00183920,IPI00297477                | P09661,        |
| 6  | 0 | IPI00007797                            | Q01469,        |



|    |   |                                        |                |
|----|---|----------------------------------------|----------------|
| 0  | 0 | IPI00786995                            |                |
| 1  | 0 | IPI00023704                            | Q93052,        |
| 2  | 0 | IPI00002255,IPI00477088                | P50851,        |
| 4  | 0 | IPI00396321                            | Q96AG4,        |
| 4  | 0 | IPI00785113                            | Q32MZ4,        |
| 0  | 0 | IPI00328218,IPI00409640,IPI00409641,IP | Q86X29,        |
| 5  | 0 | IPI00219077,IPI00514090                | P09960         |
| 2  | 0 | IPI00292657                            | Q14914,        |
| 3  | 0 | IPI00006932,IPI00216804                | Q9Y383         |
| 1  | 0 | IPI00303882                            | O60664,        |
| 2  | 0 | IPI00301104                            | P43363,        |
| 1  | 0 | IPI00018042                            | P43358,        |
| 6  | 0 | IPI00439446                            | P33908         |
| 3  | 0 | IPI00009145                            | O60476,        |
| 3  | 0 | IPI00008868                            | P46821,        |
| 2  | 0 | IPI00003842,IPI00010728,IPI00472094    | P11137         |
| 1  | 0 | IPI00003783,IPI00219604,IPI00419792,IP | P36507,Q02750, |
| 1  | 0 | IPI00396171,IPI00745518                | P27816,        |
| 5  | 0 | IPI00017596                            | Q15691,        |
| 2  | 0 | IPI00008240                            | P56192,        |
| 7  | 0 | IPI00168520,IPI00473118,IPI00554542    | O00339         |
| 8  | 0 | IPI00789551                            | P43243         |
| 1  | 0 | IPI00013214                            | P25205,        |
| 2  | 0 | IPI00031517                            | Q14566,        |
| 1  | 0 | IPI00552897                            | Q14676,        |
| 7  | 0 | IPI00291005                            | P40925,        |
| 9  | 0 | IPI00291006                            | P40926,        |
| 4  | 0 | IPI00010333                            | P21741,        |
| 2  | 0 | IPI00008215                            | P48163,        |
| 2  | 0 | IPI00399089                            | Q14696,        |
| 2  | 0 | IPI00016743                            | Q9UM21         |
| 0  | 0 | IPI00374065,IPI00455473,IPI00739902,IP | Q5JRA6         |
| 3  | 0 | IPI00293276                            | P14174,        |
| 1  | 0 | IPI00023461,IPI00216505,IPI00398718,IP | P55196         |
| 3  | 0 | IPI00008561                            | P03956,        |
| 3  | 0 | IPI00033494,IPI00220573,IPI00604523    | P19105,        |
| 1  | 0 | IPI00005537                            | P52815,        |
| 2  | 0 | IPI00219365                            | P26038,        |
| 1  | 0 | IPI00171798                            | O94776,        |
| 1  | 0 | IPI00179589                            | P58546,        |
| 4  | 0 | IPI00013955,IPI00218163,IPI00218164,IP | P15941         |
| 3  | 0 | IPI00011448                            | Q9H3R2,        |
| 14 | 0 | IPI00019502                            | P35579,        |
| 0  | 0 | IPI00789605                            | P60660,        |
| 2  | 0 | IPI00008455,IPI00069126,IPI00642722,IP | Q9UM54,        |
| 3  | 0 | IPI00797126                            | Q13765         |
| 3  | 0 | IPI00023860,IPI00789029,IPI00791065,IP | P55209,        |
| 6  | 0 | IPI00017763                            | Q99733,        |
| 1  | 0 | IPI00293817                            | Q99747,        |
| 9  | 0 | IPI00306960                            | O43776,        |
| 5  | 0 | IPI00179953                            | P49321,        |
| 2  | 0 | IPI00435020,IPI00795918                | P13591,        |
| 2  | 0 | IPI00019380                            | Q09161,        |
| 14 | 0 | IPI00604620                            | P19338,        |
| 2  | 0 | IPI00022078,IPI00183085,IPI00783586    | Q92597,        |
| 0  | 0 | IPI00291328,IPI00412122,IPI00646556    | P19404,        |
| 3  | 0 | IPI00020008                            | Q15843,        |
| 0  | 0 | IPI00023754,IPI00607581                | Q92832,        |
| 2  | 0 | IPI00029817                            | Q99519,        |
| 2  | 0 | IPI00384998,IPI00470575,IPI00513695,IP | O94856         |
| 1  | 0 | IPI00026167                            | P55769,        |
| 4  | 0 | IPI00026944                            | P14543,        |
| 2  | 0 | IPI00304435                            | Q9BPW8,        |

|    |   |                                        |         |
|----|---|----------------------------------------|---------|
| 0  | 0 | IPI00004845                            | Q9UFN0, |
| 2  | 0 | IPI00023779,IPI00456663,IPI00456664,IF | Q86X76  |
| 0  | 0 | IPI00549467                            | Q8WUF0  |
| 9  | 0 | IPI00604590                            | P15531  |
| 1  | 0 | IPI00337541                            | Q13423, |
| 2  | 0 | IPI00411937                            | O00567, |
| 2  | 0 | IPI00304596                            | Q15233, |
| 1  | 0 | IPI00006379                            | Q9Y2X3, |
| 3  | 0 | IPI00011140                            | P48745, |
| 4  | 0 | IPI00017672                            | P00491, |
| 1  | 0 | IPI00301579                            | P61916, |
| 6  | 0 | IPI00026216                            | P55786, |
| 6  | 0 | IPI00220740,IPI00549248                | P06748  |
| 6  | 0 | IPI00787050                            | Q15818  |
| 4  | 0 | IPI00012069,IPI00619898,IPI00619966    | P15559, |
| 0  | 0 | IPI00219129,IPI00515016                | P16083, |
| 0  | 0 | IPI00333776,IPI00333777,IPI00333778,IF | Q92823, |
| 4  | 0 | IPI00783655                            | Q92823  |
| 5  | 0 | IPI00299594,IPI00398715                | O14786, |
| 5  | 0 | IPI00006451                            | P46459, |
| 1  | 0 | IPI00022830,IPI00100197,IPI00376904,IF | Q9UNZ2, |
| 1  | 0 | IPI00807412                            | Q9H0P0  |
| 10 | 0 | IPI00295542,IPI00790899                | Q02818, |
| 11 | 0 | IPI00009123                            | P80303, |
| 2  | 0 | IPI00022145                            | Q9H1E3, |
| 5  | 0 | IPI00550746                            | Q9Y266, |
| 2  | 0 | IPI00646917                            | O43809, |
| 4  | 0 | IPI00296913,IPI00646762                | Q9UKK9, |
| 1  | 0 | IPI00031558                            | Q9BW91, |
| 9  | 0 | IPI00006196,IPI00292771                | Q14980, |
| 2  | 0 | IPI00009901                            | P61970, |
| 2  | 0 | IPI00016405                            | Q9NX40  |
| 2  | 0 | IPI00006721,IPI00107749,IPI00107750,IF | O60313  |
| 0  | 0 | IPI00329760                            | Q13438  |
| 2  | 0 | IPI00000581,IPI00409750                | Q96FW1  |
| 23 | 0 | IPI00010796                            | P07237, |
| 4  | 0 | IPI00299000,IPI00794875                | Q9UQ80, |
| 10 | 0 | IPI00008524,IPI00410017,IPI00478522    | P11940  |
| 1  | 0 | IPI00026546                            | P68402, |
| 0  | 0 | IPI00402613,IPI00640518,IPI00647526    | Q5JRK9, |
| 5  | 0 | IPI00217223                            | P22234, |
| 0  | 0 | IPI00787208                            | Q13177  |
| 12 | 0 | IPI00219042                            | P19021, |
| 7  | 0 | IPI00298547                            | Q99497, |
| 14 | 0 | IPI00449049                            | P09874, |
| 3  | 0 | IPI00018873,IPI00472879                | P43490, |
| 3  | 0 | IPI00218568                            | P61457, |
| 4  | 0 | IPI00016610                            | Q15365, |
| 2  | 0 | IPI00012066,IPI00216689,IPI00470509,IF | Q15366, |
| 4  | 0 | IPI00176458,IPI00215992                | Q08174, |
| 1  | 0 | IPI00009034                            | Q9UN67, |
| 3  | 0 | IPI00001428                            | Q9Y5E4, |
| 2  | 0 | IPI00294380,IPI00797038                | Q16822, |
| 4  | 0 | IPI00021700                            | P12004, |
| 15 | 0 | IPI00301961                            | P29120, |
| 17 | 0 | IPI00029131,IPI00643663                | P16519, |
| 2  | 0 | IPI00238849                            | P29122, |
| 15 | 0 | IPI00387168                            | Q8NBP7, |
| 2  | 0 | IPI00246058                            | Q8WUM4, |
| 1  | 0 | IPI00011865,IPI00018822                | Q9GZP0, |
| 17 | 0 | IPI00025252                            | P30101, |
| 10 | 0 | IPI00009904                            | P13667, |
| 10 | 0 | IPI00299571,IPI00644989                | Q15084, |

|    |   |                                                 |         |
|----|---|-------------------------------------------------|---------|
| 7  | 0 | IPI00219446                                     | P30086, |
| 1  | 0 | IPI00006052                                     | Q9UHV9, |
| 0  | 0 | IPI00015891                                     | Q9NQP4, |
| 3  | 0 | IPI00216691                                     | P07737, |
| 1  | 0 | IPI00107555,IPI00219468                         | P35080  |
| 9  | 0 | IPI00219525                                     | P52209, |
| 13 | 2 | IPI00169383                                     | P00558, |
| 3  | 0 | IPI00029997                                     | O95336, |
| 4  | 0 | IPI00550364                                     | Q96G03, |
| 1  | 0 | IPI00220739                                     | O00264, |
| 4  | 0 | IPI00011200                                     | O43175, |
| 1  | 0 | IPI00299977                                     | Q9NRX4, |
| 2  | 0 | IPI00012575                                     | O00625, |
| 6  | 0 | IPI00059366,IPI00304171,IPI00744148             | O75367  |
| 22 | 3 | IPI00479186                                     | P14618, |
| 0  | 0 | IPI00398002                                     | Q15149, |
| 3  | 0 | IPI00398778                                     | Q15149, |
| 0  | 0 | IPI00019580                                     | P00747, |
| 6  | 0 | IPI00027192                                     | Q02809, |
| 4  | 0 | IPI00030255                                     | O60568, |
| 2  | 0 | IPI00002624                                     | O43660, |
| 0  | 0 | IPI00044369,IPI00073777,IPI00640599             | Q6UX71, |
| 1  | 0 | IPI00418458                                     | Q9H307  |
| 2  | 0 | IPI00058192                                     | Q9H488, |
| 8  | 0 | IPI00015018                                     | Q15181, |
| 1  | 0 | IPI00301109,IPI00413014,IPI00470503,IPI00000000 | Q9H2U2  |
| 11 | 0 | IPI00419585                                     | P62937, |
| 10 | 0 | IPI00646304                                     | P23284, |
| 3  | 0 | IPI00026519                                     | P30405, |
| 0  | 0 | IPI00020950,IPI00216196                         | P35813, |
| 0  | 0 | IPI00103630                                     | Q8WY54  |
| 3  | 0 | IPI00218236                                     | P62140, |
| 2  | 0 | IPI00398922                                     | Q96C90, |
| 5  | 0 | IPI00419307,IPI00554737                         | P30153, |
| 3  | 0 | IPI00514424                                     | P50897, |
| 2  | 0 | IPI00399307                                     | P42785  |
| 9  | 1 | IPI00000874                                     | Q06830, |
| 7  | 0 | IPI00027350                                     | P32119, |
| 5  | 0 | IPI00024919,IPI00374151                         | P30048, |
| 3  | 0 | IPI00011937                                     | Q13162, |
| 5  | 0 | IPI00024915                                     | P30044, |
| 4  | 0 | IPI00220301                                     | P30041, |
| 3  | 0 | IPI00026154,IPI00792916                         | P14314, |
| 3  | 0 | IPI00296337                                     | P78527, |
| 3  | 0 | IPI00064328,IPI00441473                         | O14744, |
| 0  | 0 | IPI00012540                                     | O43490, |
| 2  | 0 | IPI00294004                                     | P07225, |
| 2  | 0 | IPI00004968                                     | Q9UMS4, |
| 0  | 0 | IPI00305068                                     | O94906, |
| 2  | 0 | IPI00011694                                     | P07477, |
| 6  | 0 | IPI00011695,IPI00815665                         | P07478, |
| 14 | 0 | IPI00012503,IPI00219825                         | P07602  |
| 3  | 0 | IPI00028122,IPI00333317                         | O75475  |
| 1  | 0 | IPI00016832,IPI00472442                         | P25786  |
| 4  | 0 | IPI00219622                                     | P25787, |
| 1  | 0 | IPI00789638,IPI00790038                         | P25789  |
| 2  | 0 | IPI00291922                                     | P28066, |
| 3  | 0 | IPI00029623                                     | P60900, |
| 3  | 0 | IPI00024175                                     | O14818, |
| 4  | 0 | IPI00025019                                     | P20618, |
| 3  | 0 | IPI00028006                                     | P49721, |
| 2  | 0 | IPI00028004                                     | P49720, |
| 2  | 0 | IPI00555956                                     | P28070, |

|    |   |                                        |         |
|----|---|----------------------------------------|---------|
| 1  | 0 | IPI00003217                            | Q99436, |
| 1  | 0 | IPI00000783                            | P28062, |
| 0  | 0 | IPI00023919,IPI00745502                | P62195, |
| 5  | 0 | IPI00299608,IPI00456695                | Q99460  |
| 2  | 0 | IPI00105598                            | O00231, |
| 2  | 0 | IPI00185374,IPI00335069                | O00232, |
| 2  | 0 | IPI00375380,IPI00549672                | Q9UNM6, |
| 2  | 0 | IPI00012268                            | Q13200, |
| 1  | 0 | IPI00011603                            | O43242, |
| 2  | 0 | IPI00019927                            | P51665, |
| 0  | 0 | IPI00479722                            | Q06323  |
| 6  | 0 | IPI00384051,IPI00746205                | Q9UL46, |
| 9  | 0 | IPI00179964,IPI00183626,IPI00334175    | P26599  |
| 3  | 0 | IPI00015029,IPI00789101,IPI00789698    | Q15185, |
| 0  | 0 | IPI00022048                            | Q9P2B2, |
| 3  | 0 | IPI00008998                            | Q8IU15  |
| 2  | 0 | IPI00298347,IPI00658023                | Q06124  |
| 12 | 0 | IPI00465186                            | P10586  |
| 0  | 0 | IPI00107831,IPI00642154                | P10586, |
| 2  | 0 | IPI00015756,IPI00470937,IPI00644648    | Q15262, |
| 2  | 0 | IPI00004358                            | P11216, |
| 0  | 0 | IPI00470525,IPI00783313                | P06737, |
| 1  | 0 | IPI00026665                            | P47897, |
| 15 | 1 | IPI00003590                            | O00391, |
| 0  | 0 | IPI00376394,IPI00479085,IPI00783371    | Q6ZRP7, |
| 1  | 0 | IPI00291928                            | P61106, |
| 0  | 0 | IPI00798089                            | P61019  |
| 3  | 0 | IPI00016342                            | P51149, |
| 1  | 0 | IPI00008223                            | P54727, |
| 2  | 0 | IPI00011268,IPI00216044                | Q9UKM9, |
| 0  | 0 | IPI00792352                            |         |
| 1  | 0 | IPI00414127                            | P43487, |
| 2  | 0 | IPI00221325                            | P49792, |
| 2  | 0 | IPI00329200,IPI00783829,IPI00793443    | O00410, |
| 0  | 0 | IPI00019345,IPI00640287                | P62834, |
| 3  | 0 | IPI00328319,IPI00645329                | Q09028, |
| 2  | 0 | IPI00646512                            | Q16576  |
| 2  | 0 | IPI00217626                            | Q8IXT5  |
| 2  | 0 | IPI00019046,IPI00783867                | Q9NW64, |
| 2  | 0 | IPI00004273                            | P49756, |
| 3  | 0 | IPI00001757,IPI00216659                | Q9Y5S9, |
| 2  | 0 | IPI00061178                            | Q6YP21  |
| 2  | 0 | IPI00001661,IPI00787306                | P18754  |
| 0  | 0 | IPI00465044                            | Q9P258, |
| 2  | 0 | IPI00375358,IPI00375359                | P35251  |
| 2  | 0 | IPI00027500,IPI00478231                | P61586, |
| 3  | 0 | IPI00008554                            | P03950, |
| 0  | 0 | IPI00162563                            | O75150, |
| 0  | 0 | IPI00550069                            | P13489, |
| 0  | 0 | IPI00167090                            | Q5JQC4  |
| 2  | 0 | IPI00020127                            | P27694, |
| 0  | 0 | IPI00646500                            | P15927, |
| 2  | 0 | IPI00017373                            | P35244, |
| 2  | 0 | IPI00412579,IPI00827508                | P62906, |
| 2  | 0 | IPI00376798,IPI00647168,IPI00647674,IF | P62913, |
| 3  | 0 | IPI00024933                            | P30050, |
| 1  | 0 | IPI00555744                            | P50914  |
| 2  | 0 | IPI00413324,IPI00478208,IPI00514874,IF | P18621, |
| 2  | 0 | IPI00215719                            | Q07020, |
| 2  | 0 | IPI00219153                            | P35268, |
| 1  | 0 | IPI00021266,IPI00789159,IPI00793523,IF | P62750, |
| 1  | 0 | IPI00219155,IPI00382885                | P61353, |
| 1  | 0 | IPI00219156                            | P62888, |

|    |   |                                        |                |
|----|---|----------------------------------------|----------------|
| 1  | 0 | IPI00215790,IPI00792410                | P63173,        |
| 1  | 0 | IPI00000494,IPI00797983                | P46777,        |
| 3  | 0 | IPI00012772,IPI00797230                | P62917,        |
| 1  | 0 | IPI00008530,IPI00556485                | P05388,        |
| 1  | 0 | IPI00008527                            | P05386,        |
| 5  | 0 | IPI00008529                            | P05387,        |
| 3  | 0 | IPI00008438,IPI00749512                | P46783,        |
| 2  | 0 | IPI00221089                            | P62277,        |
| 1  | 0 | IPI00215780                            | P39019,        |
| 1  | 0 | IPI00013485,IPI00165486,IPI00455428,IF | P15880,        |
| 2  | 0 | IPI00012493,IPI00794061,IPI00794659,IF | P60866,        |
| 1  | 0 | IPI00017448,IPI00387084,IPI00797280    | P63220,        |
| 1  | 0 | IPI00179330,IPI00418813,IPI00456429,IF | P62988,P62987, |
| 2  | 0 | IPI00011253                            | P23396,        |
| 4  | 0 | IPI00217030                            | P62701,        |
| 1  | 0 | IPI00013415                            | P62081,        |
| 2  | 0 | IPI00216587                            | P62241,        |
| 2  | 0 | IPI00413108,IPI00553164                | P08865,        |
| 7  | 0 | IPI00220967                            | Q9P2E9,        |
| 0  | 0 | IPI00215743                            | Q9P2E9,        |
| 5  | 0 | IPI00027765,IPI00829898                | Q9BSG5,        |
| 2  | 0 | IPI00009104                            | Q9Y230,        |
| 3  | 0 | IPI00013895                            | P31949,        |
| 1  | 0 | IPI00023234                            | Q9UBT2,        |
| 6  | 0 | IPI00300631,IPI00646058                | Q15424,        |
| 2  | 0 | IPI00005648                            | Q14151,        |
| 1  | 0 | IPI00021417                            | O43290,        |
| 3  | 0 | IPI00006025                            | Q15020,        |
| 1  | 0 | IPI00306382,IPI00453116,IPI00479205    | O14828,        |
| 33 | 0 | IPI00009362                            | P13521,        |
| 12 | 0 | IPI00292071                            | Q8WXD2,        |
| 3  | 0 | IPI00008944                            | P05408,        |
| 1  | 0 | IPI00793201                            | Q12904         |
| 3  | 0 | IPI00299086,IPI00479018,IPI00794699    | O00560,        |
| 0  | 0 | IPI00293167                            | Q99470,        |
| 3  | 0 | IPI00009794,IPI00106646                | Q9BRK5,        |
| 1  | 0 | IPI00062419                            | Q96GA7         |
| 2  | 0 | IPI00017376                            | Q15437,        |
| 10 | 0 | IPI00745729                            | Q13228         |
| 1  | 0 | IPI00029056                            | P49903,        |
| 0  | 0 | IPI00014177                            | Q15019,        |
| 2  | 0 | IPI00033025                            | Q16181,        |
| 3  | 0 | IPI00410693,IPI00470497                | Q8NC51,        |
| 15 | 0 | IPI00553177                            | P01009,        |
| 3  | 0 | IPI00027444                            | P30740,        |
| 5  | 0 | IPI00016150                            | Q99574,        |
| 6  | 0 | IPI00301311                            | Q01105,        |
| 1  | 0 | IPI00419722                            | Q9BW82         |
| 2  | 0 | IPI00386119                            | Q15637,        |
| 4  | 0 | IPI00017451                            | Q15459,        |
| 3  | 0 | IPI00017341                            | Q15428,        |
| 2  | 0 | IPI00029764                            | Q12874,        |
| 5  | 0 | IPI00026089                            | O75533,        |
| 6  | 0 | IPI00221106                            | Q13435,        |
| 0  | 0 | IPI00300371                            | Q15393,        |
| 2  | 0 | IPI00017339                            | Q15427,        |
| 1  | 0 | IPI00010404                            | Q9BWJ5,        |
| 2  | 0 | IPI00013890                            | P31947,        |
| 7  | 0 | IPI00010740                            | P23246,        |
| 7  | 0 | IPI00215884,IPI00218591,IPI00218592    | Q07955         |
| 3  | 0 | IPI00301503,IPI00472633,IPI00555647    | P62995         |
| 2  | 0 | IPI00010204                            | P84103,        |
| 2  | 0 | IPI00003377                            | Q16629,        |

|    |   |                                                 |         |
|----|---|-------------------------------------------------|---------|
| 2  | 0 | IPI00012340,IPI00793205                         | Q13242, |
| 0  | 0 | IPI00002520,IPI00748411,IPI00789370             | P34897, |
| 0  | 0 | IPI00788826                                     | Q96D94  |
| 3  | 0 | IPI00296197                                     | Q9H173, |
| 1  | 0 | IPI00647217                                     | P42285, |
| 2  | 0 | IPI00301364                                     | P63208, |
| 2  | 0 | IPI00007084                                     | Q9UJS0, |
| 4  | 0 | IPI00027493,IPI00554481,IPI00554611,IPI00554612 | P08195, |
| 4  | 0 | IPI00297211                                     | O60264, |
| 0  | 0 | IPI00797830                                     | Q92922  |
| 2  | 0 | IPI00150057                                     | Q8TAQ2, |
| 2  | 0 | IPI00794957                                     | Q969G3  |
| 1  | 0 | IPI00291939                                     | Q14683, |
| 1  | 0 | IPI00219420                                     | Q9UQE7, |
| 6  | 0 | IPI00412898                                     | Q9H4F8, |
| 1  | 0 | IPI00301528,IPI00395336                         | Q9H3U7  |
| 2  | 0 | IPI00140420                                     | Q7KZF4, |
| 2  | 0 | IPI00219483,IPI00290204                         | P08621  |
| 4  | 0 | IPI00027285,IPI00384173                         | P14678, |
| 2  | 0 | IPI00029267                                     | P08579, |
| 3  | 0 | IPI00302850                                     | P62314, |
| 2  | 0 | IPI00017963                                     | P62316, |
| 4  | 0 | IPI00017964                                     | P62318, |
| 1  | 0 | IPI00029266,IPI00068430                         | P62304, |
| 0  | 0 | IPI00016572                                     | P62308, |
| 1  | 0 | IPI00013830                                     | Q13573, |
| 3  | 0 | IPI00218733,IPI00783680                         | P00441, |
| 2  | 0 | IPI00022314                                     | P04179, |
| 3  | 0 | IPI00217930,IPI00218618,IPI00218619,IPI00218620 | P18583  |
| 5  | 0 | IPI00217882                                     | Q99523, |
| 1  | 0 | IPI00376403                                     | O43278, |
| 14 | 0 | IPI00021000,IPI00385896                         | P10451  |
| 18 | 0 | IPI00478292,IPI00744706,IPI00745092             | Q13813, |
| 12 | 0 | IPI00005614                                     | Q01082, |
| 1  | 0 | IPI00783357                                     | Q13501, |
| 2  | 0 | IPI00143753,IPI00829908                         | O15042  |
| 2  | 0 | IPI00009822                                     | P61011, |
| 1  | 0 | IPI00642816                                     | P49458, |
| 1  | 0 | IPI00168554                                     | Q9BYN0, |
| 8  | 0 | IPI00009032                                     | P05455, |
| 2  | 0 | IPI00005154                                     | Q08945, |
| 2  | 0 | IPI00032826                                     | P50502, |
| 3  | 0 | IPI00001922                                     | Q9Y5Y6, |
| 0  | 0 | IPI00013894                                     | P31948, |
| 3  | 0 | IPI00479997,IPI00642012,IPI00643115,IPI00643116 | P16949, |
| 1  | 0 | IPI00019971                                     | Q15833, |
| 3  | 0 | IPI00221222                                     | P53999, |
| 1  | 0 | IPI00334514                                     | Q8NB7,  |
| 2  | 0 | IPI00026970                                     | Q9Y5B9, |
| 2  | 0 | IPI00456681,IPI00784161                         | Q7KZ85, |
| 13 | 0 | IPI00018140,IPI00402182,IPI00402183,IPI00402184 | O60506  |
| 1  | 0 | IPI00239405,IPI00239406                         | Q8WXH0, |
| 0  | 0 | IPI00410127                                     | O95359  |
| 1  | 0 | IPI00296215                                     | P16422, |
| 10 | 0 | IPI00550363,IPI00644531,IPI00647915             | P37802, |
| 7  | 0 | IPI00744692                                     | P37837, |
| 2  | 0 | IPI00025815                                     | Q13148, |
| 8  | 0 | IPI00329633                                     | P26639, |
| 2  | 0 | IPI00217236                                     | O75347, |
| 1  | 0 | IPI00247871,IPI00744062                         | O14776, |
| 1  | 0 | IPI00219465                                     | P20062, |
| 2  | 0 | IPI00290566                                     | P17987, |
| 0  | 0 | IPI00294619                                     | Q92734, |

|    |   |                                        |                     |
|----|---|----------------------------------------|---------------------|
| 2  | 0 | IPI00021834                            | P10646,             |
| 9  | 0 | IPI00022462                            | P02786,             |
| 5  | 0 | IPI00328840                            | Q86V81,             |
| 5  | 0 | IPI00104050                            | Q9Y2W1,             |
| 1  | 0 | IPI00005615,IPI00183949,IPI00642600,IF | Q01085,             |
| 5  | 0 | IPI00032292,IPI00642739                | P01033,             |
| 4  | 0 | IPI00027166,IPI00787781,IPI00788747    | P16035,             |
| 17 | 0 | IPI00643920                            | P29401,             |
| 3  | 0 | IPI00298994,IPI00784273                | Q9Y490,             |
| 4  | 0 | IPI00013174                            | Q96PK6,             |
| 3  | 0 | IPI00443909                            | Q9Y2B0,             |
| 2  | 0 | IPI00005087                            | Q9NYL9,             |
| 10 | 0 | IPI00030131                            | P42167,             |
| 8  | 0 | IPI00298362                            | O00300,             |
| 0  | 0 | IPI00024364                            | Q92973,             |
| 1  | 0 | IPI00015602                            | O94826,             |
| 2  | 0 | IPI00413611                            | P11387,             |
| 1  | 0 | IPI00178667,IPI00414101,IPI00478232    | P11388              |
| 3  | 0 | IPI00023137,IPI00477672                | O14657,             |
| 5  | 0 | IPI00218323,IPI00619951,IPI00619958,IF | P55327,             |
| 12 | 0 | IPI00465028,IPI00797687                | P60174,             |
| 8  | 0 | IPI00178083                            | P06753              |
| 8  | 0 | IPI00298237,IPI00554538                | O14773              |
| 2  | 0 | IPI00640197                            | P29144              |
| 4  | 0 | IPI00022970,IPI00742682                | P12270,             |
| 4  | 0 | IPI00438229,IPI00438230                | Q13263              |
| 3  | 0 | IPI00301028                            | Q6ZMU5              |
| 0  | 0 | IPI00003515                            | Q15643,             |
| 1  | 0 | IPI00019450,IPI00642416,IPI00646322,IF | P10155,             |
| 3  | 0 | IPI00018768                            | Q15631,             |
| 2  | 0 | IPI00387144,IPI00792677                | P68363,             |
| 12 | 0 | IPI00218343                            | Q9BQE3,             |
| 2  | 0 | IPI00011654                            | P07437,             |
| 4  | 1 | IPI00013475                            | Q13885              |
| 18 | 0 | IPI00007752                            | P68371,             |
| 1  | 0 | IPI00183508,IPI00385754                | Q12792              |
| 0  | 0 | IPI00550917                            | Q6IBS0,             |
| 6  | 0 | IPI00216298                            | P10599,             |
| 1  | 0 | IPI00026328                            | O95881,             |
| 3  | 0 | IPI00401264                            | Q9BS26,             |
| 3  | 0 | IPI00395646                            | Q8NBS9              |
| 1  | 0 | IPI00305692,IPI00642032                | O43396,             |
| 2  | 0 | IPI00008552                            | O76003,             |
| 2  | 0 | IPI00005613,IPI00619914,IPI00619942    | Q01081,             |
| 4  | 0 | IPI00031556,IPI00746657,IPI00830039    | P26368,             |
| 1  | 0 | IPI00181306,IPI00514856,IPI00646016    | Q14157,             |
| 4  | 0 | IPI00645078                            | P22314,             |
| 1  | 0 | IPI00328154,IPI00375533                | Q8TBC4,             |
| 1  | 0 | IPI00032957,IPI00450472                | P63279,             |
| 1  | 0 | IPI00021347                            | P68036,             |
| 2  | 0 | IPI00003949                            | P61088,             |
| 2  | 0 | IPI00019599,IPI00030962,IPI00397947,IF | Q13404,             |
| 0  | 0 | IPI00024502                            | Q9NRR5,             |
| 12 | 0 | IPI00018352                            | P09936,             |
| 0  | 0 | IPI00219512,IPI00219513,IPI00299313,IF | Q9Y5K5,             |
| 3  | 0 | IPI00294495                            | Q9Y3C8,             |
| 8  | 0 | IPI00619903                            | Q9NYU2,             |
| 21 | 0 | IPI00031420                            | O60701,             |
| 0  | 0 | IPI00014919,IPI00329331,IPI00395676    | Q07131,Q16851,Q1685 |
| 2  | 0 | IPI00399139                            | Q49AN5              |
| 6  | 0 | IPI00219913,IPI00640357                | P54578,             |
| 0  | 0 | IPI00000728                            | Q9Y4E8,             |
| 1  | 0 | IPI00024664,IPI00375145                | P45974,             |

|    |   |                                     |         |
|----|---|-------------------------------------|---------|
| 0  | 0 | IPI00003965,IPI00646721,IPI00783739 | Q93009, |
| 3  | 0 | IPI00170692                         | Q9P0L0, |
| 3  | 0 | IPI00000873,IPI00829641             | P26640, |
| 0  | 0 | IPI00156689                         | Q99536, |
| 1  | 0 | IPI00291175,IPI00307162             | P18206  |
| 20 | 0 | IPI00022774                         | P55072, |
| 17 | 0 | IPI00069058                         | O15240  |
| 6  | 0 | IPI00218852                         | P09327, |
| 2  | 0 | IPI00020719                         | Q7Z434, |
| 3  | 0 | IPI00018931                         | Q96QK1, |
| 0  | 0 | IPI00412737                         | P23381  |
| 0  | 0 | IPI00216256,IPI00746165             | O75083  |
| 4  | 0 | IPI00298961,IPI00784388             | O14980, |
| 12 | 0 | IPI00220834                         | P13010, |
| 14 | 0 | IPI00465430,IPI00644712             | P12956, |
| 0  | 0 | IPI00031812                         | P67809, |
| 1  | 0 | IPI00216318,IPI00759832             | P31946  |
| 6  | 0 | IPI00000816                         | P62258, |
| 3  | 0 | IPI00220642                         | P61981, |
| 2  | 0 | IPI00018146                         | P27348, |
| 10 | 0 | IPI00021263                         | P63104, |
| 2  | 0 | IPI00333858,IPI00748303             | Q96KR1  |
| 0  | 0 | IPI00219760                         | O43670, |















6,Q5QNW6,Q93079,Q99877,Q99879,Q99880,P62807,

5,
