# Supplementary material
Source: PubMed Central journal article supplement (PMC2816016)
Supplement: M900134-MCP200_4.pdf [file M900134-MCP200_4.pdf]

## Supplementary Table 9: List of proteins identified by mass spectrometry in the

| Protein name                                                                                  |
|-----------------------------------------------------------------------------------------------|
| Gene_Symbol=- 105 kDa protein                                                                 |
| Gene_Symbol=- 23 kDa protein                                                                  |
| Gene_Symbol=- 35 kDa protein                                                                  |
| Gene_Symbol=- 52 kDa protein                                                                  |
| Gene_Symbol=- 64 kDa protein                                                                  |
| Gene_Symbol=- 67 kDa protein                                                                  |
| Gene_Symbol=- 71 kDa protein                                                                  |
| Gene_Symbol=- DAZAP1/MEF2D fusion protein                                                     |
| Gene_Symbol=- Eukaryotic translation elongation factor 1 alpha-like 3                         |
| Gene_Symbol=- Hypothetical protein                                                            |
| Gene_Symbol=- P37 AUF1                                                                        |
| Gene_Symbol=ABCF1 Isoform 2 of ATP-binding cassette sub-family F member 1                     |
| Gene_Symbol=ABHD14B Isoform 1 of Abhydrolase domain-containing protein 14B                    |
| Gene_Symbol=ACIN1 Isoform 1 of Apoptotic chromatin condensation inducer in the nucleus        |
| Gene_Symbol=ACLY ATP citrate lyase isoform 2                                                  |
| Gene_Symbol=ACLY ATP-citrate synthase                                                         |
| Gene_Symbol=ACTA1 Actin, alpha skeletal muscle                                                |
| Gene_Symbol=ACTB Actin, cytoplasmic 1                                                         |
| Gene_Symbol=ACTN1 Alpha-actinin-1                                                             |
| Gene_Symbol=ACTN4 Alpha-actinin-4                                                             |
| Gene_Symbol=ACTR2 actin-related protein 2 isoform a                                           |
| Gene_Symbol=ACTR3 Actin-like protein 3                                                        |
| Gene_Symbol=ADA Adenosine deaminase                                                           |
| Gene_Symbol=ADAM10 ADAM 10 precursor                                                          |
| Gene_Symbol=ADAM17 Isoform A of ADAM 17 precursor                                             |
| Gene_Symbol=ADAM9 Isoform 1 of ADAM 9 precursor                                               |
| Gene_Symbol=ADI1 Isoform 1 of 1,2-dihydroxy-3-keto-5-methylthiopentene dioxygenase            |
| Gene_Symbol=ADRM1 Adhesion-regulating molecule 1 precursor                                    |
| Gene_Symbol=AGRN Agrin precursor                                                              |
| Gene_Symbol=AHCY Adenosylhomocysteinase                                                       |
| Gene_Symbol=AHNAK 313 kDa protein                                                             |
| Gene_Symbol=AHSA1 Activator of 90 kDa heat shock protein ATPase homolog 1                     |
| Gene_Symbol=AIFM1 Isoform 1 of Apoptosis-inducing factor 1, mitochondrial precursor           |
| Gene_Symbol=AIP AH receptor-interacting protein                                               |
| Gene_Symbol=AK2 Isoform 1 of Adenylate kinase isoenzyme 2, mitochondrial                      |
| Gene_Symbol=AKAP12 A-kinase anchor protein 12 isoform 2                                       |
| Gene_Symbol=AKAP12 Isoform 1 of A-kinase anchor protein 12                                    |
| Gene_Symbol=AKR1B1 Aldose reductase                                                           |
| Gene_Symbol=ALDOA Fructose-bisphosphate aldolase A                                            |
| Gene_Symbol=ANGPTL4 Angiotensinogen-related protein 4 precursor                               |
| Gene_Symbol=ANLN Isoform 2 of Actin-binding protein anillin                                   |
| Gene_Symbol=ANP32A Acidic leucine-rich nuclear phosphoprotein 32 family member A              |
| Gene_Symbol=ANP32B Isoform 1 of Acidic leucine-rich nuclear phosphoprotein 32 family member B |
| Gene_Symbol=ANP32E Acidic leucine-rich nuclear phosphoprotein 32 family member E              |
| Gene_Symbol=ANXA1 Annexin A1                                                                  |
| Gene_Symbol=ANXA11 Annexin A11                                                                |
| Gene_Symbol=ANXA2 annexin A2 isoform 1                                                        |
| Gene_Symbol=ANXA5 Annexin A5                                                                  |
| Gene_Symbol=APEH Acylamino-acid-releasing enzyme                                              |
| Gene_Symbol=APEX1 DNA-(apurinic or apyrimidinic site) lyase                                   |
| Gene_Symbol=APLP1 Amyloid-like protein 1 precursor                                            |
| Gene_Symbol=APLP2 Isoform 1 of Amyloid-like protein 2 precursor                               |
| Gene_Symbol=APOA1BP apolipoprotein A-I binding protein precursor                              |
| Gene_Symbol=APOE Apolipoprotein E precursor                                                   |
| Gene_Symbol=APP Isoform APP770 of Amyloid beta A4 protein precursor (Fragment)                |
| Gene_Symbol=ARF1 ADP-ribosylation factor 1                                                    |
| Gene_Symbol=ARF3 ADP-ribosylation factor 3                                                    |
| Gene_Symbol=ARHGDI1 Rho GDP-dissociation inhibitor 1                                          |
| Gene_Symbol=ARMET ARMET protein precursor                                                     |
| Gene_Symbol=ARPC1B Actin-related protein 2/3 complex subunit 1B                               |

|                                                                                                      |
|------------------------------------------------------------------------------------------------------|
| Gene_Symbol=ARPC4 72 kDa protein                                                                     |
| Gene_Symbol=ARTS-1 type 1 tumor necrosis factor receptor shedding aminopeptidase regulator isoform a |
| Gene_Symbol=ASCC3L1 U5 small nuclear ribonucleoprotein 200 kDa helicase                              |
| Gene_Symbol=ATIC Bifunctional purine biosynthesis protein PURH                                       |
| Gene_Symbol=ATOX1 Copper transport protein ATOX1                                                     |
| Gene_Symbol=ATP6AP1 53 kDa protein                                                                   |
| Gene_Symbol=ATP6AP2 Renin receptor precursor                                                         |
| Gene_Symbol=ATP6V1B2 Vacuolar ATP synthase subunit B, brain isoform                                  |
| Gene_Symbol=ATP6V1G2;BAT1 BAT1 protein                                                               |
| Gene_Symbol=AXL AXL receptor tyrosine kinase isoform 1                                               |
| Gene_Symbol=B2M Beta-2-microglobulin precursor                                                       |
| Gene_Symbol=B3GAT3 B3GAT3 protein (Fragment)                                                         |
| Gene_Symbol=B3GNT2 Isoform 2 of UDP-GlcNAc:betaGal beta-1,3-N-acetylglucosaminyltransferase 2        |
| Gene_Symbol=B4GALT1 Isoform Long of Beta-1,4-galactosyltransferase 1                                 |
| Gene_Symbol=BASP1 Brain acid soluble protein 1                                                       |
| Gene_Symbol=BCLAF1 Isoform 1 of Bcl-2-associated transcription factor 1                              |
| Gene_Symbol=BGN Biglycan precursor                                                                   |
| Gene_Symbol=BOLA2B;BOLA2 Bola-like protein 2 isoform a                                               |
| Gene_Symbol=BSG Isoform 2 of Basigin precursor                                                       |
| Gene_Symbol=BTD biotinidase precursor                                                                |
| Gene_Symbol=BTF3 Isoform 2 of Transcription factor BTF3                                              |
| Gene_Symbol=C12orf5 Uncharacterized protein C12orf5                                                  |
| Gene_Symbol=C14orf141;LTBP2 Latent-transforming growth factor beta-binding protein 2 precursor       |
| Gene_Symbol=C14orf156 SRA stem-loop-interacting RNA-binding protein, mitochondrial precursor         |
| Gene_Symbol=C14orf166 CLE                                                                            |
| Gene_Symbol=C14orf78 similar to AHNAK nucleoprotein isoform 1                                        |
| Gene_Symbol=C19orf10 Uncharacterized protein C19orf10 precursor                                      |
| Gene_Symbol=C1QBP Complement component 1 Q subcomponent-binding protein, mitochondrial precursor     |
| Gene_Symbol=C1R Complement C1r subcomponent precursor                                                |
| Gene_Symbol=C1RL Complement C1r-like protein                                                         |
| Gene_Symbol=C20orf77 Uncharacterized protein C20orf77                                                |
| Gene_Symbol=C3orf17 Isoform 1 of Uncharacterized protein C3orf17                                     |
| Gene_Symbol=C6orf108 c-Myc-responsive protein Rcl                                                    |
| Gene_Symbol=C7orf24 Uncharacterized protein C7orf24                                                  |
| Gene_Symbol=CA2 Carbonic anhydrase 2                                                                 |
| Gene_Symbol=CACYBP Isoform 1 of Calcyclin-binding protein                                            |
| Gene_Symbol=CAD CAD protein                                                                          |
| Gene_Symbol=CALD1 Isoform 4 of Caldesmon                                                             |
| Gene_Symbol=CALM3;CALM2;CALM1 Calmodulin                                                             |
| Gene_Symbol=CALR Calreticulin precursor                                                              |
| Gene_Symbol=CALU Calumenin precursor                                                                 |
| Gene_Symbol=CAND1 Isoform 1 of Cullin-associated NEDD8-dissociated protein 1                         |
| Gene_Symbol=CANT1 Isoform 1 of Soluble calcium-activated nucleotidase 1                              |
| Gene_Symbol=CANX Calnexin precursor                                                                  |
| Gene_Symbol=CAP1 Adenylyl cyclase-associated protein 1                                               |
| Gene_Symbol=CAPN1 Calpain-1 catalytic subunit                                                        |
| Gene_Symbol=CAPZA1 F-actin capping protein subunit alpha-1                                           |
| Gene_Symbol=CAPZA2 F-actin capping protein subunit alpha-2                                           |
| Gene_Symbol=CAPZB Capping protein (Actin filament) muscle Z-line, beta                               |
| Gene_Symbol=CARHSP1 Calcium-regulated heat stable protein 1                                          |
| Gene_Symbol=CARS cysteinyl-tRNA synthetase isoform c                                                 |
| Gene_Symbol=CBR1 Carbonyl reductase [NADPH] 1                                                        |
| Gene_Symbol=CBX1 Chromobox protein homolog 1                                                         |
| Gene_Symbol=CBX3;LOC653972 Chromobox protein homolog 3                                               |
| Gene_Symbol=CCL2 Small inducible cytokine A2 precursor                                               |
| Gene_Symbol=CCT2 T-complex protein 1 subunit beta                                                    |
| Gene_Symbol=CCT3 chaperonin containing TCP1, subunit 3 isoform b                                     |
| Gene_Symbol=CCT4 T-complex protein 1 subunit delta                                                   |
| Gene_Symbol=CCT5 T-complex protein 1 subunit epsilon                                                 |
| Gene_Symbol=CCT6A T-complex protein 1 subunit zeta                                                   |
| Gene_Symbol=CCT7 T-complex protein 1 subunit eta                                                     |
| Gene_Symbol=CCT8 Chaperonin containing TCP1, subunit 8 (Theta) variant                               |
| Gene_Symbol=CD109 Isoform 1 of CD109 antigen precursor                                               |



|                                                                                                           |
|-----------------------------------------------------------------------------------------------------------|
| Gene_Symbol=CTSL1 Cathepsin L precursor                                                                   |
| Gene_Symbol=CTSL2 Cathepsin L2 precursor                                                                  |
| Gene_Symbol=CTSZ Cathepsin Z precursor                                                                    |
| Gene_Symbol=CTTN Src substrate cortactin                                                                  |
| Gene_Symbol=CUL3 Isoform 1 of Cullin-3                                                                    |
| Gene_Symbol=CUTA Isoform A of Protein CutA precursor                                                      |
| Gene_Symbol=CXCL1 Growth-regulated protein alpha precursor                                                |
| Gene_Symbol=CYCS Cytochrome c                                                                             |
| Gene_Symbol=CYR61 CYR61 protein                                                                           |
| Gene_Symbol=D4ST1 Carbohydrate sulfotransferase D4ST1                                                     |
| Gene_Symbol=DAG1 Dystroglycan precursor                                                                   |
| Gene_Symbol=DARS Aspartyl-tRNA synthetase, cytoplasmic                                                    |
| Gene_Symbol=DBI Isoform a 1 of Acyl-CoA-binding protein                                                   |
| Gene_Symbol=DBN1 Drebrin                                                                                  |
| Gene_Symbol=DBN1 drebrin 1 isoform b                                                                      |
| Gene_Symbol=DCTN2 dynactin 2                                                                              |
| Gene_Symbol=DDB1 DNA damage-binding protein 1                                                             |
| Gene_Symbol=DDR1 Isoform 1 of Epithelial discoidin domain-containing receptor 1 precursor                 |
| Gene_Symbol=DDT D-dopachrome decarboxylase                                                                |
| Gene_Symbol=DDX1 ATP-dependent RNA helicase DDX1                                                          |
| Gene_Symbol=DDX21 Isoform 1 of Nucleolar RNA helicase 2                                                   |
| Gene_Symbol=DDX42 Isoform 1 of ATP-dependent RNA helicase DDX42                                           |
| Gene_Symbol=DDX5 Probable ATP-dependent RNA helicase DDX5                                                 |
| Gene_Symbol=DENR Density-regulated protein                                                                |
| Gene_Symbol=DFFA Isoform DFF45 of DNA fragmentation factor subunit alpha (Fragment)                       |
| Gene_Symbol=DHX9 ATP-dependent RNA helicase A                                                             |
| Gene_Symbol=DKFZp686D0972 hypothetical protein LOC345651                                                  |
| Gene_Symbol=DKK1 Dickkopf-related protein 1 precursor                                                     |
| Gene_Symbol=DNAJA1 DnaJ homolog subfamily A member 1                                                      |
| Gene_Symbol=DNAJC8 DnaJ homolog subfamily C member 8                                                      |
| Gene_Symbol=DNM1L Isoform 1 of Dynamin-1-like protein                                                     |
| Gene_Symbol=DOHH Deoxyhypusine hydroxylase                                                                |
| Gene_Symbol=DPP3;BBS1 Isoform 1 of Dipeptidyl-peptidase 3                                                 |
| Gene_Symbol=DPYSL2 Dihydropyrimidinase-related protein 2                                                  |
| Gene_Symbol=DSG2 desmoglein 2 preproprotein                                                               |
| Gene_Symbol=DSTN Destrin                                                                                  |
| Gene_Symbol=DUT dUTP pyrophosphatase isoform 1 precursor                                                  |
| Gene_Symbol=DYNC1H1 532 kDa protein                                                                       |
| Gene_Symbol=DYNLL1 Dynein light chain 1, cytoplasmic                                                      |
| Gene_Symbol=EBNA1BP2 EBNA1 binding protein 2                                                              |
| Gene_Symbol=ECH1 Delta(3,5)-Delta(2,4)-dienoyl-CoA isomerase, mitochondrial precursor                     |
| Gene_Symbol=EDIL3 Isoform 1 of EGF-like repeat and discoidin I-like domain-containing protein 3 precursor |
| Gene_Symbol=EEF1A1 Elongation factor 1-alpha 1                                                            |
| Gene_Symbol=EEF1A2 Elongation factor 1-alpha 2                                                            |
| Gene_Symbol=EEF1B2 Elongation factor 1-beta                                                               |
| Gene_Symbol=EEF1D eukaryotic translation elongation factor 1 delta isoform 1                              |
| Gene_Symbol=EEF1G Elongation factor 1-gamma                                                               |
| Gene_Symbol=EEF2 Elongation factor 2                                                                      |
| Gene_Symbol=EFEMP1 Isoform 1 of EGF-containing fibulin-like extracellular matrix protein 1 precursor      |
| Gene_Symbol=EFNA1 Isoform 1 of Ephrin-A1 precursor                                                        |
| Gene_Symbol=EFNB1 Ephrin-B1 precursor                                                                     |
| Gene_Symbol=EFTUD2 116 kDa U5 small nuclear ribonucleoprotein component                                   |
| Gene_Symbol=EGFL9 Isoform 1 of EGF-like domain-containing protein 9 precursor                             |
| Gene_Symbol=EIF1 Eukaryotic translation initiation factor 1                                               |
| Gene_Symbol=EIF2S1 Eukaryotic translation initiation factor 2 subunit 1                                   |
| Gene_Symbol=EIF2S2 Eukaryotic translation initiation factor 2 subunit 2                                   |
| Gene_Symbol=EIF2S3 Eukaryotic translation initiation factor 2 subunit 3                                   |
| Gene_Symbol=EIF3S1 Eukaryotic translation initiation factor 3 subunit 1                                   |
| Gene_Symbol=EIF3S4 Eukaryotic translation initiation factor 3 subunit 4                                   |
| Gene_Symbol=EIF3S6 Eukaryotic translation initiation factor 3 subunit 6                                   |
| Gene_Symbol=EIF3S9 99 kDa protein                                                                         |
| Gene_Symbol=EIF4A1 Eukaryotic initiation factor 4A-I                                                      |
| Gene_Symbol=EIF4B Eukaryotic translation initiation factor 4B                                             |

|                                                                                                    |
|----------------------------------------------------------------------------------------------------|
| Gene_Symbol=EIF4G1 Isoform E of Eukaryotic translation initiation factor 4 gamma 1                 |
| Gene_Symbol=EIF5A Isoform 2 of Eukaryotic translation initiation factor 5A-1                       |
| Gene_Symbol=EIF5B Eukaryotic translation initiation factor 5B                                      |
| Gene_Symbol=ELAVL1 ELAV-like protein 1                                                             |
| Gene_Symbol=EML4 Echinoderm microtubule-associated protein-like 4                                  |
| Gene_Symbol=ENO1 Isoform alpha-enolase of Alpha-enolase                                            |
| Gene_Symbol=ENO2 Gamma-enolase                                                                     |
| Gene_Symbol=ENOPH1 Isoform 1 of Enolase-phosphatase E1                                             |
| Gene_Symbol=ENSA Isoform 2 of Alpha-endosulfine                                                    |
| Gene_Symbol=EPHA2 ephrin receptor EphA2                                                            |
| Gene_Symbol=EPRS glutamyl-prolyl tRNA synthetase                                                   |
| Gene_Symbol=EPS15L1 Epidermal growth factor receptor substrate 15-like 1                           |
| Gene_Symbol=ERH Enhancer of rudimentary homolog                                                    |
| Gene_Symbol=ERP29 Endoplasmic reticulum protein ERp29 precursor                                    |
| Gene_Symbol=EWSR1 CDNA FLJ31747 fis, clone NT2RI2007377, highly similar to RNA-BINDING PROTEIN EWS |
| Gene_Symbol=EXT1 Exostosin-1                                                                       |
| Gene_Symbol=EXT2 Isoform 1 of Exostosin-2                                                          |
| Gene_Symbol=FAM10A4 Protein FAM10A4                                                                |
| Gene_Symbol=FAM3C Protein FAM3C precursor                                                          |
| Gene_Symbol=FAM50A Protein FAM50A                                                                  |
| Gene_Symbol=FASN Fatty acid synthase                                                               |
| Gene_Symbol=FAT Cadherin-related tumor suppressor homolog precursor                                |
| Gene_Symbol=FBLN1 Isoform C of Fibulin-1 precursor                                                 |
| Gene_Symbol=FBLN1 Isoform D of Fibulin-1 precursor                                                 |
| Gene_Symbol=FBLN2 Fibulin-2 precursor                                                              |
| Gene_Symbol=FBN1 312 kDa protein                                                                   |
| Gene_Symbol=FDPS Farnesyl diphosphate synthase                                                     |
| Gene_Symbol=FER1L3 Isoform 1 of Myoferlin                                                          |
| Gene_Symbol=FHL1 Four and a half LIM domains 1 variant                                             |
| Gene_Symbol=FHL2 FHL2 isoform 5                                                                    |
| Gene_Symbol=FIP1L1 Isoform 1 of Pre-mRNA 3'-end-processing factor FIP1                             |
| Gene_Symbol=FKBP1A FKBP1A protein                                                                  |
| Gene_Symbol=FKBP3 FK506-binding protein 3                                                          |
| Gene_Symbol=FKBP4 FK506-binding protein 4                                                          |
| Gene_Symbol=FLJ10292 Protein mago nashi homolog 2                                                  |
| Gene_Symbol=FLJ21908 CDNA: FLJ21908 fis, clone HEP03830                                            |
| Gene_Symbol=FLNA Filamin-A                                                                         |
| Gene_Symbol=FLNB Isoform 1 of Filamin-B                                                            |
| Gene_Symbol=FREM2 Isoform 1 of FRAS1-related extracellular matrix protein 2 precursor              |
| Gene_Symbol=FSCN1 Fascin                                                                           |
| Gene_Symbol=FSTL1 Follistatin-related protein 1 precursor                                          |
| Gene_Symbol=FSTL3 Follistatin-related protein 3 precursor                                          |
| Gene_Symbol=FSTL5 Follistatin-related protein 5 precursor                                          |
| Gene_Symbol=FUBP1 Isoform 1 of Far upstream element-binding protein 1                              |
| Gene_Symbol=FUS Fus-like protein (Fragment)                                                        |
| Gene_Symbol=FXR1 Isoform 2 of Fragile X mental retardation syndrome-related protein 1              |
| Gene_Symbol=G3BP1 Ras GTPase-activating protein-binding protein 1                                  |
| Gene_Symbol=G6PD glucose-6-phosphate dehydrogenase isoform a                                       |
| Gene_Symbol=GAA 106 kDa protein                                                                    |
| Gene_Symbol=GALNS N-acetylgalactosamine-6-sulfatase precursor                                      |
| Gene_Symbol=GALNT2 Polypeptide N-acetylgalactosaminyltransferase 2                                 |
| Gene_Symbol=GALNT6 Polypeptide N-acetylgalactosaminyltransferase 6                                 |
| Gene_Symbol=GANAB Isoform 2 of Neutral alpha-glucosidase AB precursor                              |
| Gene_Symbol=GAPDH Glyceraldehyde-3-phosphate dehydrogenase                                         |
| Gene_Symbol=GARS Glycyl-tRNA synthetase                                                            |
| Gene_Symbol=GART Isoform Long of Trifunctional purine biosynthetic protein adenosine-3             |
| Gene_Symbol=GATAD2B Transcriptional repressor p66 beta                                             |
| Gene_Symbol=GBA Isoform Long of Glucosylceramidase precursor                                       |
| Gene_Symbol=GDF15 Growth/differentiation factor 15 precursor                                       |
| Gene_Symbol=GDI1 Rab GDP dissociation inhibitor alpha                                              |
| Gene_Symbol=GDI2 Rab GDP dissociation inhibitor beta                                               |
| Gene_Symbol=GGH Gamma-glutamyl hydrolase precursor                                                 |
| Gene_Symbol=GLA Alpha-galactosidase A precursor                                                    |

|                                                                                                                                    |
|------------------------------------------------------------------------------------------------------------------------------------|
| Gene_Symbol=GLG1 golgi apparatus protein 1                                                                                         |
| Gene_Symbol=GLO1 Lactoylglutathione lyase                                                                                          |
| Gene_Symbol=GLOD4 Uncharacterized protein C17orf25                                                                                 |
| Gene_Symbol=GLT25D1 CDNA PSEC0241 fis, clone NT2RP3000234, moderately similar to Homo sapiens cerebral cell adhesion molecule mRNA |
| Gene_Symbol=GM2A Ganglioside GM2 activator precursor                                                                               |
| Gene_Symbol=GMFB Glia maturation factor beta                                                                                       |
| Gene_Symbol=GMPS GMP synthase                                                                                                      |
| Gene_Symbol=GNB2L1 Lung cancer oncogene 7                                                                                          |
| Gene_Symbol=GNPDA1 Glucosamine-6-phosphate isomerase                                                                               |
| Gene_Symbol=GNPDA2 Glucosamine-6-phosphate isomerase SB52                                                                          |
| Gene_Symbol=GNS N-acetylglucosamine-6-sulfatase precursor                                                                          |
| Gene_Symbol=GOLPH2 Golgi phosphoprotein 2                                                                                          |
| Gene_Symbol=GORASP2 Isoform 2 of Golgi reassembly-stacking protein 2                                                               |
| Gene_Symbol=GOT1 Aspartate aminotransferase, cytoplasmic                                                                           |
| Gene_Symbol=GOT2 Aspartate aminotransferase, mitochondrial precursor                                                               |
| Gene_Symbol=GPC1 Glypican-1 precursor                                                                                              |
| Gene_Symbol=GPI Glucose-6-phosphate isomerase                                                                                      |
| Gene_Symbol=GPIAP1 membrane component chromosome 11 surface marker 1 isoform 1                                                     |
| Gene_Symbol=GPR126 Developmentally regulated G-protein-coupled receptor alpha 2                                                    |
| Gene_Symbol=GPR37 Probable G-protein coupled receptor 37 precursor                                                                 |
| Gene_Symbol=GRHPR Glyoxylate reductase/hydroxypyruvate reductase                                                                   |
| Gene_Symbol=GRHPR GRHPR protein (Fragment)                                                                                         |
| Gene_Symbol=GRN Isoform 1 of Granulins precursor                                                                                   |
| Gene_Symbol=GSN Isoform 1 of Gelsolin precursor                                                                                    |
| Gene_Symbol=GSS Glutathione synthetase                                                                                             |
| Gene_Symbol=GSTO1 Glutathione transferase omega-1                                                                                  |
| Gene_Symbol=GSTP1 Glutathione S-transferase P                                                                                      |
| Gene_Symbol=GTPBP9 Isoform 1 of Putative GTP-binding protein 9                                                                     |
| Gene_Symbol=H2AFV Histone H2AV                                                                                                     |
| Gene_Symbol=H3F3A;H3F3B Histone H3.3                                                                                               |
| Gene_Symbol=HARS Histidyl-tRNA synthetase, cytoplasmic                                                                             |
| Gene_Symbol=hCG_2015269 similar to Phosphoglycerate mutase 1 (Phosphoglycerate mutase isozyme B) (PGAM-B) (BPG-dependent PGAM 1)   |
| Gene_Symbol=HDAC2 histone deacetylase 2                                                                                            |
| Gene_Symbol=HDGF Hepatoma-derived growth factor                                                                                    |
| Gene_Symbol=HEXA Beta-hexosaminidase alpha chain precursor                                                                         |
| Gene_Symbol=HEXB Beta-hexosaminidase beta chain precursor                                                                          |
| Gene_Symbol=HINT1 Histidine triad nucleotide-binding protein 1                                                                     |
| Gene_Symbol=HIST1H1C Histone H1.2                                                                                                  |
| Gene_Symbol=HIST1H1D Histone H1.3                                                                                                  |
| Gene_Symbol=HIST1H2AA Histone H2A type 1-A                                                                                         |
| Gene_Symbol=HIST1H2AH Histone H2A type 1-H                                                                                         |
| Gene_Symbol=HIST1H2BL Histone H2B type 1-L                                                                                         |
| Gene_Symbol=HIST1H3C;HIST1H3G;HIST1H3H;HIST1H3D;HIST1H3I;HIST1H3J;HIST1H3A;HIST1H3F;HIST1H3E;HIST1H3B Histone H3.1                 |
| Gene_Symbol=HIST1H4C;HIST2H4B;HIST2H4A;HIST1H4H;HIST1H4F;HIST1H4L;HIST1H4J;HIST1H4B;HIST1H4I;HIST1H4D;HIST4H4;HIST1H4E             |
| Gene_Symbol=HIST2H2BE Histone H2B type 2-E                                                                                         |
| Gene_Symbol=HIST2H3A;HIST2H3C Histone H3.2                                                                                         |
| Gene_Symbol=HLA-A HLA class I histocompatibility antigen, A-80 alpha chain precursor                                               |
| Gene_Symbol=HLA-C;HLA-B;MICA;LOC730410 HLA class I histocompatibility antigen, B-50 alpha chain precursor                          |
| Gene_Symbol=HLA-C;HLA-B;MICA;LOC730410 HLA class I histocompatibility antigen, Cw-2 alpha chain precursor                          |
| Gene_Symbol=HLA-C;HLA-B;MICA;LOC730410 HLA class I histocompatibility antigen, Cw-3 alpha chain precursor                          |
| Gene_Symbol=HLA-C;HLA-B;MICA;LOC730410 HLA class I histocompatibility antigen, Cw-6 alpha chain precursor                          |
| Gene_Symbol=HMBS Isoform 1 of Porphobilinogen deaminase                                                                            |
| Gene_Symbol=HMGB1 High mobility group protein B1                                                                                   |
| Gene_Symbol=HN1 Isoform 2 of Hematological and neurological expressed 1 protein                                                    |
| Gene_Symbol=HNPA0 Heterogeneous nuclear ribonucleoprotein A0                                                                       |
| Gene_Symbol=HNPA1;HNPA1L-2 Isoform A1-B of Heterogeneous nuclear ribonucleoprotein A1                                              |
| Gene_Symbol=HNPA2B1 Isoform B1 of Heterogeneous nuclear ribonucleoproteins A2/B1                                                   |
| Gene_Symbol=HNPA3 Isoform 1 of Heterogeneous nuclear ribonucleoprotein A3                                                          |
| Gene_Symbol=HNRPAB Isoform 3 of Heterogeneous nuclear ribonucleoprotein A/B                                                        |
| Gene_Symbol=HNRPC Isoform C1 of Heterogeneous nuclear ribonucleoproteins C1/C2                                                     |
| Gene_Symbol=HNRPDL JKTBP1delta6                                                                                                    |
| Gene_Symbol=HNRPB1 HNRPH1 protein                                                                                                  |
| Gene_Symbol=HNRPB3 Isoform 1 of Heterogeneous nuclear ribonucleoprotein H3                                                         |

|                                                                                                              |
|--------------------------------------------------------------------------------------------------------------|
| Gene_Symbol=HNRPK Isoform 1 of Heterogeneous nuclear ribonucleoprotein K                                     |
| Gene_Symbol=HNRPL heterogeneous nuclear ribonucleoprotein L isoform a                                        |
| Gene_Symbol=HNRPM Isoform 2 of Heterogeneous nuclear ribonucleoprotein M                                     |
| Gene_Symbol=HNRPR Heterogeneous nuclear ribonucleoprotein R                                                  |
| Gene_Symbol=HNRPU heterogeneous nuclear ribonucleoprotein U isoform a                                        |
| Gene_Symbol=HNRPU Isoform Short of Heterogeneous nuclear ribonucleoprotein U                                 |
| Gene_Symbol=HPRT1 Hypoxanthine-guanine phosphoribosyltransferase                                             |
| Gene_Symbol=HSP90AA1 Heat shock protein HSP 90-alpha 2                                                       |
| Gene_Symbol=HSP90AB1 Heat shock protein HSP 90-beta                                                          |
| Gene_Symbol=HSP90B1 Endoplasmic precursor                                                                    |
| Gene_Symbol=HSPA1B;HSPA1A Heat shock 70 kDa protein 1                                                        |
| Gene_Symbol=HSPA4 Heat shock 70 kDa protein 4                                                                |
| Gene_Symbol=HSPA5 HSPA5 protein                                                                              |
| Gene_Symbol=HSPA8 Isoform 1 of Heat shock cognate 71 kDa protein                                             |
| Gene_Symbol=HSPA9 Heat shock 70kDa protein 9B variant (Fragment)                                             |
| Gene_Symbol=HSPB1 Heat-shock protein beta-1                                                                  |
| Gene_Symbol=HSPD1 61 kDa protein                                                                             |
| Gene_Symbol=HSPE1 10 kDa heat shock protein, mitochondrial                                                   |
| Gene_Symbol=HSPG2 Basement membrane-specific heparan sulfate proteoglycan core protein precursor             |
| Gene_Symbol=HSPH1 Isoform Alpha of Heat-shock protein 105 kDa                                                |
| Gene_Symbol=HTRA1 HTRA1 protein (Fragment)                                                                   |
| Gene_Symbol=HYOU1 150 kDa oxygen-regulated protein precursor                                                 |
| Gene_Symbol=IARS Isoleucyl-tRNA synthetase, cytoplasmic                                                      |
| Gene_Symbol=ICAM1 Intercellular adhesion molecule 1 precursor                                                |
| Gene_Symbol=ICAM5 Intercellular adhesion molecule 5 precursor                                                |
| Gene_Symbol=IGFBP2 Insulin-like growth factor-binding protein 2 precursor                                    |
| Gene_Symbol=IGFBP6 Insulin-like growth factor-binding protein 6 precursor                                    |
| Gene_Symbol=IGFBP7 Insulin-like growth factor-binding protein 7 precursor                                    |
| Gene_Symbol=IGFBPL1 Insulin-like growth factor binding protein-like 1                                        |
| Gene_Symbol=IL6ST Isoform 1 of Interleukin-6 receptor subunit beta precursor                                 |
| Gene_Symbol=ILF2 Interleukin enhancer-binding factor 2                                                       |
| Gene_Symbol=ILF3 Isoform 5 of Interleukin enhancer-binding factor 3                                          |
| Gene_Symbol=IMMT Isoform 1 of Mitochondrial inner membrane protein                                           |
| Gene_Symbol=IMPDH2 Inosine-5'-monophosphate dehydrogenase 2                                                  |
| Gene_Symbol=IPO7 120 kDa protein                                                                             |
| Gene_Symbol=IQGAP1 Ras GTPase-activating-like protein IQGAP1                                                 |
| Gene_Symbol=ISYNA1 55 kDa protein                                                                            |
| Gene_Symbol=ITGB1 integrin beta 1 isoform 1A precursor                                                       |
| Gene_Symbol=ITGB4BP Eukaryotic translation initiation factor 6                                               |
| Gene_Symbol=ITM2B Integral membrane protein 2B                                                               |
| Gene_Symbol=KARS Lysyl-tRNA synthetase                                                                       |
| Gene_Symbol=KHDRBS1 Isoform 3 of KH domain-containing, RNA-binding, signal transduction-associated protein 1 |
| Gene_Symbol=KHSRP KH-type splicing regulatory protein                                                        |
| Gene_Symbol=KIAA0319L KIAA0319-like                                                                          |
| Gene_Symbol=KIAA1967 Isoform 1 of Protein KIAA1967                                                           |
| Gene_Symbol=KLC1 Isoform K of Kinesin light chain 1                                                          |
| Gene_Symbol=KPNA2 Importin alpha-2 subunit                                                                   |
| Gene_Symbol=KPNA4 Importin alpha-4 subunit                                                                   |
| Gene_Symbol=KPNB1 Importin beta-1 subunit                                                                    |
| Gene_Symbol=KRT18 Keratin, type I cytoskeletal 18                                                            |
| Gene_Symbol=KRT8 Keratin, type II cytoskeletal 8                                                             |
| Gene_Symbol=KTN1 Isoform 1 of Kinectin                                                                       |
| Gene_Symbol=L1CAM Isoform 1 of Neural cell adhesion molecule L1 precursor                                    |
| Gene_Symbol=LAMA1 Laminin subunit alpha-1 precursor                                                          |
| Gene_Symbol=LAMA2 laminin alpha 2 subunit isoform b precursor                                                |
| Gene_Symbol=LAMA5 Laminin subunit alpha-5 precursor                                                          |
| Gene_Symbol=LAMB1 Laminin subunit beta-1 precursor                                                           |
| Gene_Symbol=LAMB2 Laminin subunit beta-2 precursor                                                           |
| Gene_Symbol=LAMC1 Laminin subunit gamma-1 precursor                                                          |
| Gene_Symbol=LDHA Isoform 1 of L-lactate dehydrogenase A chain                                                |
| Gene_Symbol=LDHB L-lactate dehydrogenase B chain                                                             |
| Gene_Symbol=LDLR Low-density lipoprotein receptor precursor                                                  |
| Gene_Symbol=LGALS1 Galectin-1                                                                                |

|                                                                                                                          |
|--------------------------------------------------------------------------------------------------------------------------|
| Gene_Symbol=LGALS3BP Galectin-3-binding protein precursor                                                                |
| Gene_Symbol=LMGN Legumain precursor                                                                                      |
| Gene_Symbol=LIMA1 Isoform Beta of LIM domain and actin-binding protein 1                                                 |
| Gene_Symbol=LIPA CDNA FLJ43203 fis, clone FEBRA2008468, highly similar to LYSOSOMAL ACID LIPASE/CHOLESTERYL ESTER HYDROL |
| Gene_Symbol=LMAN1 ERGIC-53 protein precursor                                                                             |
| Gene_Symbol=LMAN2 Vesicular integral-membrane protein VIP36 precursor                                                    |
| Gene_Symbol=LMNA Isoform A of Lamin-A/C                                                                                  |
| Gene_Symbol=LMNA Isoform C of Lamin-A/C                                                                                  |
| Gene_Symbol=LMNB1 Lamin-B1                                                                                               |
| Gene_Symbol=LMNB2 Lamin B2                                                                                               |
| Gene_Symbol=LOC196463 Hypothetical protein LOC196463                                                                     |
| Gene_Symbol=LOC440055 similar to ribosomal protein S12                                                                   |
| Gene_Symbol=LOC646993 similar to high-mobility group box 3                                                               |
| Gene_Symbol=LOC653994;EIF4H Isoform Long of Eukaryotic translation initiation factor 4H                                  |
| Gene_Symbol=LOC728320 similar to lactotransferrin                                                                        |
| Gene_Symbol=LOC728641;FABP5;LOC731043 Fatty acid-binding protein, epidermal                                              |
| Gene_Symbol=LOC731751 similar to protein kinase, DNA-activated, catalytic polypeptide                                    |
| Gene_Symbol=LOC84661 Dpy-30-like protein                                                                                 |
| Gene_Symbol=LOXL2;ENTPD4 Lysyl oxidase homolog 2 precursor                                                               |
| Gene_Symbol=LRP2 Low-density lipoprotein receptor-related protein 2 precursor                                            |
| Gene_Symbol=LRRC59 Leucine-rich repeat-containing protein 59                                                             |
| Gene_Symbol=LRRFIP1 Isoform 2 of Leucine-rich repeat flightless-interacting protein 1                                    |
| Gene_Symbol=LSM8 U6 snRNA-associated Sm-like protein LSM8                                                                |
| Gene_Symbol=LTA4H Isoform 1 of Leukotriene A-4 hydrolase                                                                 |
| Gene_Symbol=LTA4H Isoform 2 of Leukotriene A-4 hydrolase                                                                 |
| Gene_Symbol=LTB4DH NADP-dependent leukotriene B4 12-hydroxydehydrogenase                                                 |
| Gene_Symbol=LTBP3 Isoform 1 of Latent-transforming growth factor beta-binding protein 3 precursor                        |
| Gene_Symbol=LTBP4 latent transforming growth factor beta binding protein 4 isoform c                                     |
| Gene_Symbol=LUC7L2 Isoform 1 of Putative RNA-binding protein Luc7-like 2                                                 |
| Gene_Symbol=M6PRBP1 Isoform B of Mannose-6-phosphate receptor-binding protein 1                                          |
| Gene_Symbol=MACF1 Isoform 2 of Microtubule-actin cross-linking factor 1, isoforms 1/2/3/5                                |
| Gene_Symbol=MAGEA4 Melanoma-associated antigen 4                                                                         |
| Gene_Symbol=MAGED2 Isoform 1 of Melanoma-associated antigen D2                                                           |
| Gene_Symbol=MAN1B1 Endoplasmic reticulum mannosyl-oligosaccharide 1,2-alpha-mannosidase                                  |
| Gene_Symbol=MAP4 Microtubule-associated protein 4 isoform 1 variant (Fragment)                                           |
| Gene_Symbol=MAPRE1 Microtubule-associated protein RP/EB family member 1                                                  |
| Gene_Symbol=MAT2A S-adenosylmethionine synthetase isoform type-2                                                         |
| Gene_Symbol=MATR3 100 kDa protein                                                                                        |
| Gene_Symbol=MBTPS1 MBTPS1 protein                                                                                        |
| Gene_Symbol=MCAM Isoform 1 of Cell surface glycoprotein MUC18 precursor                                                  |
| Gene_Symbol=MCM3 DNA replication licensing factor MCM3                                                                   |
| Gene_Symbol=MCM6 DNA replication licensing factor MCM6                                                                   |
| Gene_Symbol=MCM7 Isoform 1 of DNA replication licensing factor MCM7                                                      |
| Gene_Symbol=MDH1 Malate dehydrogenase, cytoplasmic                                                                       |
| Gene_Symbol=MDH2 Malate dehydrogenase, mitochondrial precursor                                                           |
| Gene_Symbol=MDK Midkine precursor                                                                                        |
| Gene_Symbol=MET Isoform 1 of Hepatocyte growth factor receptor precursor                                                 |
| Gene_Symbol=METAP2 Similar to methionyl aminopeptidase 2                                                                 |
| Gene_Symbol=MFAP2 Microfibrillar-associated protein 2 precursor                                                          |
| Gene_Symbol=MFGE8 Lactadherin precursor                                                                                  |
| Gene_Symbol=MGAT5 Alpha-1,6-mannosylglycoprotein 6-beta-N-acetylglucosaminyltransferase V                                |
| Gene_Symbol=MICB MHC class I antigen                                                                                     |
| Gene_Symbol=MIF Macrophage migration inhibitory factor                                                                   |
| Gene_Symbol=MINPP1 Isoform 1 of Multiple inositol polyphosphate phosphatase 1 precursor                                  |
| Gene_Symbol=MMP11 Stromelysin-3 precursor                                                                                |
| Gene_Symbol=MRC2 Macrophage mannose receptor 2 precursor                                                                 |
| Gene_Symbol=MRLC2 Myosin regulatory light chain                                                                          |
| Gene_Symbol=MSN Moesin                                                                                                   |
| Gene_Symbol=MTPN Myotrophin                                                                                              |
| Gene_Symbol=MYH9 Myosin-9                                                                                                |
| Gene_Symbol=MYL6 19 kDa protein                                                                                          |
| Gene_Symbol=MYO1C myosin IC isoform a                                                                                    |
| Gene_Symbol=NACA Similar to Nascent polypeptide associated complex alpha subunit                                         |



|                                                                                                     |
|-----------------------------------------------------------------------------------------------------|
| Gene_Symbol=NAGLU Alpha-N-acetylglucosaminidase precursor                                           |
| Gene_Symbol=NAP1L1 Nucleosome assembly protein 1-like 1                                             |
| Gene_Symbol=NAP1L4 Nucleosome assembly protein 1-like 4                                             |
| Gene_Symbol=NARS Asparaginyl-tRNA synthetase, cytoplasmic                                           |
| Gene_Symbol=NASP Isoform 1 of Nuclear autoantigenic sperm protein                                   |
| Gene_Symbol=NCL Isoform 1 of Nucleolin                                                              |
| Gene_Symbol=NCOA5 Nuclear receptor coactivator 5                                                    |
| Gene_Symbol=NDRG1 Protein NDRG1                                                                     |
| Gene_Symbol=NEDD8 NEDD8 precursor                                                                   |
| Gene_Symbol=NEO1 Isoform 1 of Neogenin precursor                                                    |
| Gene_Symbol=NIT2 Nitrilase family member 2                                                          |
| Gene_Symbol=NMB Isoform 1 of Neuromedin-B precursor                                                 |
| Gene_Symbol=NME2;NME1;NME1-NME2 NME1-NME2 protein                                                   |
| Gene_Symbol=NOL1 Isoform 1 of Putative RNA methyltransferase NOL1                                   |
| Gene_Symbol=NONO Non-POU domain-containing octamer-binding protein                                  |
| Gene_Symbol=NOTCH2 Neurogenic locus notch homolog protein 2 precursor                               |
| Gene_Symbol=NOV Protein NOV homolog precursor                                                       |
| Gene_Symbol=NP CDNA FLJ25678 fis, clone TST04067, highly similar to PURINE NUCLEOSIDE PHOSPHORYLASE |
| Gene_Symbol=NPC2 Epididymal secretory protein E1 precursor                                          |
| Gene_Symbol=NPEPPS Puromycin-sensitive aminopeptidase                                               |
| Gene_Symbol=NPM1 Isoform 1 of Nucleophosmin                                                         |
| Gene_Symbol=NPTX1 Neuronal pentraxin-1 precursor                                                    |
| Gene_Symbol=NPTX2 Neuronal pentraxin-2 precursor                                                    |
| Gene_Symbol=NQO1 NAD                                                                                |
| Gene_Symbol=NSFL1C Isoform 1 of NSFL1 cofactor p47                                                  |
| Gene_Symbol=NUCB1 Nucleobindin-1 precursor                                                          |
| Gene_Symbol=NUCB2 Nucleobindin-2 precursor                                                          |
| Gene_Symbol=NUDC Nuclear migration protein nudC                                                     |
| Gene_Symbol=NUDT21 Cleavage and polyadenylation specificity factor 5                                |
| Gene_Symbol=NUDT5 ADP-sugar pyrophosphatase                                                         |
| Gene_Symbol=NUMA1 Isoform 2 of Nuclear mitotic apparatus protein 1                                  |
| Gene_Symbol=NUTF2 Nuclear transport factor 2                                                        |
| Gene_Symbol=OLFM1 Isoform 1 of Noelin precursor                                                     |
| Gene_Symbol=OLFML3 Isoform 1 of Olfactomedin-like protein 3 precursor                               |
| Gene_Symbol=OS9 76 kDa protein                                                                      |
| Gene_Symbol=OTUB1 Isoform 2 of Ubiquitin thioesterase protein OTUB1                                 |
| Gene_Symbol=P4HB Protein disulfide-isomerase precursor                                              |
| Gene_Symbol=PA2G4 Proliferation-associated protein 2G4                                              |
| Gene_Symbol=PABPC1 Isoform 1 of Polyadenylate-binding protein 1                                     |
| Gene_Symbol=PABPC4 Isoform 2 of Polyadenylate-binding protein 4                                     |
| Gene_Symbol=PFAFH1B1 Isoform 1 of Platelet-activating factor acetylhydrolase IB subunit alpha       |
| Gene_Symbol=PFAFH1B2 Platelet-activating factor acetylhydrolase IB subunit beta                     |
| Gene_Symbol=PAICS Multifunctional protein ADE2                                                      |
| Gene_Symbol=PAK2 Serine/threonine-protein kinase PAK 2                                              |
| Gene_Symbol=PAM Isoform 1 of Peptidyl-glycine alpha-amidating monooxygenase precursor               |
| Gene_Symbol=PARK7 Protein DJ-1                                                                      |
| Gene_Symbol=PARP1 Poly [ADP-ribose] polymerase 1                                                    |
| Gene_Symbol=PBEF1 Isoform 1 of Nicotinamide phosphoribosyltransferase                               |
| Gene_Symbol=PCBP1 Poly(rC)-binding protein 1                                                        |
| Gene_Symbol=PCBP2 poly(rC)-binding protein 2 isoform b                                              |
| Gene_Symbol=PCDH7 Isoform B of Protocadherin-7 precursor                                            |
| Gene_Symbol=PCID1 PNAS-125                                                                          |
| Gene_Symbol=PCMT1 Isoform 1 of Protein-L-isoaspartate(D-aspartate) O-methyltransferase              |
| Gene_Symbol=PCNA Proliferating cell nuclear antigen                                                 |
| Gene_Symbol=PCOLCE Procollagen C-endopeptidase enhancer 1 precursor                                 |
| Gene_Symbol=PCOLCE2 Procollagen C-endopeptidase enhancer 2 precursor                                |
| Gene_Symbol=PCSK1N ProSAAS precursor                                                                |
| Gene_Symbol=PDCD5 Programmed cell death protein 5                                                   |
| Gene_Symbol=PDCD6IP PDCD6IP protein                                                                 |
| Gene_Symbol=PDIA3 Protein disulfide-isomerase A3 precursor                                          |
| Gene_Symbol=PDIA4 Protein disulfide-isomerase A4 precursor                                          |
| Gene_Symbol=PDIA6 Isoform 2 of Protein disulfide-isomerase A6 precursor                             |
| Gene_Symbol=PDLIM5 PDZ and LIM domain protein 5                                                     |

|                                                                                            |
|--------------------------------------------------------------------------------------------|
| Gene_Symbol=PEA15 Astrocytic phosphoprotein PEA-15                                         |
| Gene_Symbol=PEBP1 Phosphatidylethanolamine-binding protein 1                               |
| Gene_Symbol=PEPD Xaa-Pro dipeptidase                                                       |
| Gene_Symbol=PFAS Phosphoribosylformylglycinamide synthase                                  |
| Gene_Symbol=PFDN2 Prefoldin subunit 2                                                      |
| Gene_Symbol=PFDN4 Prefoldin subunit 4                                                      |
| Gene_Symbol=PFKP Phosphofructokinase, platelet                                             |
| Gene_Symbol=PFN1 Profilin-1                                                                |
| Gene_Symbol=PGK1 Phosphoglycerate kinase 1                                                 |
| Gene_Symbol=PGLS 6-phosphogluconolactonase                                                 |
| Gene_Symbol=PGM2 Phosphoglucomutase-2                                                      |
| Gene_Symbol=PGRMC1 Membrane-associated progesterone receptor component 1                   |
| Gene_Symbol=PHPT1 14 kDa phosphohistidine phosphatase                                      |
| Gene_Symbol=PKM2 Isoform M2 of Pyruvate kinase isozymes M1/M2                              |
| Gene_Symbol=PLAU Urokinase-type plasminogen activator precursor                            |
| Gene_Symbol=PLAUR Isoform 1 of Urokinase plasminogen activator surface receptor precursor  |
| Gene_Symbol=PLEC1 plectin 1 isoform 1                                                      |
| Gene_Symbol=PLG Plasminogen precursor                                                      |
| Gene_Symbol=PLOD1 Procollagen-lysine,2-oxoglutarate 5-dioxygenase 1 precursor              |
| Gene_Symbol=PLOD3 Procollagen-lysine,2-oxoglutarate 5-dioxygenase 3 precursor              |
| Gene_Symbol=PLS3 plastin 3                                                                 |
| Gene_Symbol=PLTP Isoform 1 of Phospholipid transfer protein precursor                      |
| Gene_Symbol=PLXNB2 similar to Plexin-B2 precursor                                          |
| Gene_Symbol=PNPO Pyridoxine-5'-phosphate oxidase                                           |
| Gene_Symbol=POSTN Isoform 1 of Periostin precursor                                         |
| Gene_Symbol=PPA1 Inorganic pyrophosphatase                                                 |
| Gene_Symbol=PPIA;LOC654188;LOC653214 Peptidyl-prolyl cis-trans isomerase A                 |
| Gene_Symbol=PPIB peptidylprolyl isomerase B precursor                                      |
| Gene_Symbol=PPIE Isoform B of Peptidyl-prolyl cis-trans isomerase E                        |
| Gene_Symbol=PPM1G Protein phosphatase 2C isoform gamma                                     |
| Gene_Symbol=PPP1CA Serine/threonine-protein phosphatase PP1-alpha catalytic subunit        |
| Gene_Symbol=PPP1R14B Similar to Protein phosphatase 1 regulatory subunit 14B               |
| Gene_Symbol=PPP2CA Serine/threonine-protein phosphatase 2A catalytic subunit alpha isoform |
| Gene_Symbol=PPP2R1A alpha isoform of regulatory subunit A, protein phosphatase 2           |
| Gene_Symbol=PPP5C Serine/threonine-protein phosphatase 5                                   |
| Gene_Symbol=PPT1 Palmitoyl-protein thioesterase 1 precursor                                |
| Gene_Symbol=PPT2 Isoform 1 of Lysosomal thioesterase PPT2 precursor                        |
| Gene_Symbol=PRCP prolylcarboxypeptidase isoform 2 preproprotein                            |
| Gene_Symbol=PRDX1 Peroxiredoxin-1                                                          |
| Gene_Symbol=PRDX3 Thioredoxin-dependent peroxide reductase, mitochondrial precursor        |
| Gene_Symbol=PRDX4 Peroxiredoxin-4                                                          |
| Gene_Symbol=PRDX5 Isoform Mitochondrial of Peroxiredoxin-5, mitochondrial precursor        |
| Gene_Symbol=PRDX6 Peroxiredoxin-6                                                          |
| Gene_Symbol=PRKCSH Glucosidase 2 subunit beta precursor                                    |
| Gene_Symbol=PRMT5 protein arginine methyltransferase 5 isoform b                           |
| Gene_Symbol=PROCR Endothelial protein C receptor precursor                                 |
| Gene_Symbol=PRPF19 Pre-mRNA-processing factor 19                                           |
| Gene_Symbol=PRSS23 Serine protease 23 precursor                                            |
| Gene_Symbol=PSAP Isoform Sap-mu-0 of Proactivator polypeptide precursor                    |
| Gene_Symbol=PSMA1 Isoform Short of Proteasome subunit alpha type 1                         |
| Gene_Symbol=PSMA2 Proteasome subunit alpha type 2                                          |
| Gene_Symbol=PSMA4 Proteasome subunit alpha type 4                                          |
| Gene_Symbol=PSMA5 Proteasome subunit alpha type 5                                          |
| Gene_Symbol=PSMA6 Proteasome subunit alpha type 6                                          |
| Gene_Symbol=PSMA7 Isoform 1 of Proteasome subunit alpha type 7                             |
| Gene_Symbol=PSMB1 Proteasome subunit beta type 1 precursor                                 |
| Gene_Symbol=PSMB2 Proteasome subunit beta type 2                                           |
| Gene_Symbol=PSMB3 Proteasome subunit beta type 3                                           |
| Gene_Symbol=PSMB4 Proteasome subunit beta type 4 precursor                                 |
| Gene_Symbol=PSMB5 Hypothetical protein DKFZp686I0180 (Fragment)                            |
| Gene_Symbol=PSMC5 26S protease regulatory subunit 8                                        |
| Gene_Symbol=PSMC6 26S protease regulatory subunit S10B                                     |
| Gene_Symbol=PSMD1 Isoform 1 of 26S proteasome non-ATPase regulatory subunit 1              |

|                                                                                          |
|------------------------------------------------------------------------------------------|
| Gene_Symbol=PSMD11 Proteasome 26S non-ATPase subunit 11 variant (Fragment)               |
| Gene_Symbol=PSMD2 P67                                                                    |
| Gene_Symbol=PSMD3 26S proteasome non-ATPase regulatory subunit 3                         |
| Gene_Symbol=PSMD7 26S proteasome non-ATPase regulatory subunit 7                         |
| Gene_Symbol=PSME1 Proteasome activator complex subunit 1                                 |
| Gene_Symbol=PSME2 Proteasome activator complex subunit 2                                 |
| Gene_Symbol=PTBP1 Isoform 1 of Polypyrimidine tract-binding protein 1                    |
| Gene_Symbol=PTGES3 19 kDa protein                                                        |
| Gene_Symbol=PTK7 PTK7 protein tyrosine kinase 7 isoform a variant (Fragment)             |
| Gene_Symbol=PTPLAD1 Protein-tyrosine phosphatase-like A domain-containing protein 1      |
| Gene_Symbol=PTPN12 Tyrosine-protein phosphatase non-receptor type 12                     |
| Gene_Symbol=PTPRF protein tyrosine phosphatase, receptor type, F isoform 2 precursor     |
| Gene_Symbol=PTPRS protein tyrosine phosphatase, receptor type, sigma isoform 2 precursor |
| Gene_Symbol=PTRF Isoform 1 of Polymerase I and transcript release factor                 |
| Gene_Symbol=PTX3 Pentraxin-related protein PTX3 precursor                                |
| Gene_Symbol=PVR Isoform Beta of Poliovirus receptor precursor                            |
| Gene_Symbol=PVRL2 Isoform Alpha of Poliovirus receptor-related protein 2 precursor       |
| Gene_Symbol=PXDN similar to peroxidase                                                   |
| Gene_Symbol=PYGL Glycogen phosphorylase, liver form                                      |
| Gene_Symbol=QPCT Glutamyl-peptide cyclotransferase precursor                             |
| Gene_Symbol=QSCN6 Isoform 1 of Sulfhydryl oxidase 1 precursor                            |
| Gene_Symbol=QSCN6L1 78 kDa protein                                                       |
| Gene_Symbol=RAB11B Ras-related protein Rab-11B                                           |
| Gene_Symbol=RAB7A Ras-related protein Rab-7                                              |
| Gene_Symbol=RAD23B UV excision repair protein RAD23 homolog B                            |
| Gene_Symbol=RAN 24 kDa protein                                                           |
| Gene_Symbol=RAN 27 kDa protein                                                           |
| Gene_Symbol=RANBP1 Ran-specific GTPase-activating protein                                |
| Gene_Symbol=RANBP2 E3 SUMO-protein ligase RanBP2                                         |
| Gene_Symbol=RANBP5 Importin beta-3                                                       |
| Gene_Symbol=RAP1B Ras-related protein Rap-1b precursor                                   |
| Gene_Symbol=RBBP4 Histone-binding protein RBBP4                                          |
| Gene_Symbol=RBBP7 Retinoblastoma binding protein 7                                       |
| Gene_Symbol=RBM15 Isoform 1 of Putative RNA-binding protein 15                           |
| Gene_Symbol=RBM8A Isoform 1 of RNA-binding protein 8A                                    |
| Gene_Symbol=RBMX Heterogeneous nuclear ribonucleoprotein G                               |
| Gene_Symbol=RCC1 regulator of chromosome condensation 1 isoform a                        |
| Gene_Symbol=RCN1 Reticulocalbin-1 precursor                                              |
| Gene_Symbol=RECQL ATP-dependent DNA helicase Q1                                          |
| Gene_Symbol=RHO C Rho-related GTP-binding protein RhoC precursor                         |
| Gene_Symbol=RNASE4;ANG Angiogenin precursor                                              |
| Gene_Symbol=RNAS2T2 Isoform 1 of Ribonuclease T2 precursor                               |
| Gene_Symbol=RNH1 Ribonuclease/angiogenin inhibitor                                       |
| Gene_Symbol=RNPEP 68 kDa protein                                                         |
| Gene_Symbol=ROBO1 ROBO1 protein                                                          |
| Gene_Symbol=ROCK2 Rho-associated protein kinase 2                                        |
| Gene_Symbol=RPA3 Replication protein A 14 kDa subunit                                    |
| Gene_Symbol=RPL10A 60S ribosomal protein L10a                                            |
| Gene_Symbol=RPL12 60S ribosomal protein L12                                              |
| Gene_Symbol=RPL18 60S ribosomal protein L18                                              |
| Gene_Symbol=RPL38 60S ribosomal protein L38                                              |
| Gene_Symbol=RPL4 60S ribosomal protein L4                                                |
| Gene_Symbol=RPL5 60S ribosomal protein L5                                                |
| Gene_Symbol=RPL8 60S ribosomal protein L8                                                |
| Gene_Symbol=RPLP0 24 kDa protein                                                         |
| Gene_Symbol=RPLP1;hCG_1641617 60S acidic ribosomal protein P1                            |
| Gene_Symbol=RPLP2 60S acidic ribosomal protein P2                                        |
| Gene_Symbol=RPS10 40S ribosomal protein S10                                              |
| Gene_Symbol=RPS14 40S ribosomal protein S14                                              |
| Gene_Symbol=RPS2 40S ribosomal protein S2                                                |
| Gene_Symbol=RPS20 40S ribosomal protein S20                                              |
| Gene_Symbol=RPS27A;UBC;UBB ubiquitin and ribosomal protein S27a precursor                |
| Gene_Symbol=RPS3 40S ribosomal protein S3                                                |

|                                                                                                                                |
|--------------------------------------------------------------------------------------------------------------------------------|
| Gene_Symbol=RPS3A 40S ribosomal protein S3a                                                                                    |
| Gene_Symbol=RPS4X 40S ribosomal protein S4, X isoform                                                                          |
| Gene_Symbol=RPS5 40S ribosomal protein S5                                                                                      |
| Gene_Symbol=RPS7 40S ribosomal protein S7                                                                                      |
| Gene_Symbol=RPS8 40S ribosomal protein S8                                                                                      |
| Gene_Symbol=RPSA;LOC388524 Ribosomal protein SA                                                                                |
| Gene_Symbol=RTBDN retbindin isoform 2                                                                                          |
| Gene_Symbol=RTN4 Isoform 1 of Reticulon-4                                                                                      |
| Gene_Symbol=RUVBL1 Isoform 1 of RuvB-like 1                                                                                    |
| Gene_Symbol=RUVBL2 RuvB-like 2                                                                                                 |
| Gene_Symbol=S100A10 Protein S100-A10                                                                                           |
| Gene_Symbol=S100A11 Protein S100-A11                                                                                           |
| Gene_Symbol=SAFB2 Scaffold attachment factor B2                                                                                |
| Gene_Symbol=SARS Seryl-tRNA synthetase                                                                                         |
| Gene_Symbol=SCG2 Secretogranin-2 precursor                                                                                     |
| Gene_Symbol=SCYE1 Multisynthetase complex auxiliary component p43                                                              |
| Gene_Symbol=SDC4 Syndecan-4 precursor                                                                                          |
| Gene_Symbol=SDCBP Syntenin-1                                                                                                   |
| Gene_Symbol=SDF2L1 Dihydropyrimidinase-like 2                                                                                  |
| Gene_Symbol=SDF4 45 kDa calcium-binding protein precursor                                                                      |
| Gene_Symbol=SECTM1 Secreted and transmembrane protein 1 precursor                                                              |
| Gene_Symbol=SEMA3A Semaphorin-3A precursor                                                                                     |
| Gene_Symbol=SEMA3C Semaphorin-3C precursor                                                                                     |
| Gene_Symbol=SEMA4B semaphorin 4B precursor                                                                                     |
| Gene_Symbol=SEMA4C Semaphorin-4C precursor                                                                                     |
| Gene_Symbol=SEPHS1 Selenide, water dikinase 1                                                                                  |
| Gene_Symbol=SEPT2 Septin-2                                                                                                     |
| Gene_Symbol=SEPT9 Isoform 1 of Septin-9                                                                                        |
| Gene_Symbol=SERBP1 Isoform 4 of Plasminogen activator inhibitor 1 RNA-binding protein                                          |
| Gene_Symbol=SERPING1 Plasma protease C1 inhibitor precursor                                                                    |
| Gene_Symbol=SERPINH1 Serpin H1 precursor                                                                                       |
| Gene_Symbol=SET Isoform 1 of Protein SET                                                                                       |
| Gene_Symbol=SEZ6L2 Type I transmembrane receptor precursor                                                                     |
| Gene_Symbol=SF3A1 Splicing factor 3 subunit 1                                                                                  |
| Gene_Symbol=SF3A2 SF3A2 protein (Fragment)                                                                                     |
| Gene_Symbol=SF3A3 Splicing factor 3A subunit 3                                                                                 |
| Gene_Symbol=SF3B1 Splicing factor 3B subunit 1                                                                                 |
| Gene_Symbol=SF3B2 splicing factor 3B subunit 2                                                                                 |
| Gene_Symbol=SF3B3 Isoform 1 of Splicing factor 3B subunit 3                                                                    |
| Gene_Symbol=SF3B4 Splicing factor 3B subunit 4                                                                                 |
| Gene_Symbol=SFN Isoform 1 of 14-3-3 protein sigma                                                                              |
| Gene_Symbol=SFPQ Isoform Long of Splicing factor, proline- and glutamine-rich                                                  |
| Gene_Symbol=SFRP1 Secreted frizzled-related protein 1 precursor                                                                |
| Gene_Symbol=SFRS2 Splicing factor, arginine/serine-rich 2                                                                      |
| Gene_Symbol=SFRS7 Isoform 1 of Splicing factor, arginine/serine-rich 7                                                         |
| Gene_Symbol=SGTA Small glutamine-rich tetratricopeptide repeat-containing protein A                                            |
| Gene_Symbol=SH3BGL3 Hypothetical protein                                                                                       |
| Gene_Symbol=SHC1 SHC (Src homology 2 domain containing) transforming protein 1                                                 |
| Gene_Symbol=SIAHBP1 fuse-binding protein-interacting repressor isoform a                                                       |
| Gene_Symbol=SKIV2L2 Superkiller viralicidic activity 2-like 2                                                                  |
| Gene_Symbol=SKP1A Isoform 1 of S-phase kinase-associated protein 1A                                                            |
| Gene_Symbol=SLC3A2 4F2 cell-surface antigen heavy chain                                                                        |
| Gene_Symbol=SMARCC1 SWI/SNF-related matrix-associated actin-dependent regulator of chromatin subfamily C member 1              |
| Gene_Symbol=SMARCC2 Isoform 2 of SWI/SNF-related matrix-associated actin-dependent regulator of chromatin subfamily C member 2 |
| Gene_Symbol=SND1 Staphylococcal nuclease domain-containing protein 1                                                           |
| Gene_Symbol=SNRP70 Isoform 1 of U1 small nuclear ribonucleoprotein 70 kDa                                                      |
| Gene_Symbol=SNRPB Isoform SM-B' of Small nuclear ribonucleoprotein-associated proteins B and B'                                |
| Gene_Symbol=SNRPD1 Small nuclear ribonucleoprotein Sm D1                                                                       |
| Gene_Symbol=SNRPD2 Small nuclear ribonucleoprotein Sm D2                                                                       |
| Gene_Symbol=SNRPD3 Small nuclear ribonucleoprotein Sm D3                                                                       |
| Gene_Symbol=SNRPG Small nuclear ribonucleoprotein G                                                                            |
| Gene_Symbol=SNW1 SNW domain-containing protein 1                                                                               |
| Gene_Symbol=SOD1 16 kDa protein                                                                                                |

|                                                                                             |
|---------------------------------------------------------------------------------------------|
| Gene_Symbol=SPOCK1 Testican-1 precursor                                                     |
| Gene_Symbol=SPOCK2 Testican-2 precursor                                                     |
| Gene_Symbol=SPTAN1 Isoform 3 of Spectrin alpha chain, brain                                 |
| Gene_Symbol=SPTBN1 Isoform Long of Spectrin beta chain, brain 1                             |
| Gene_Symbol=SRRM2 Isoform 1 of Serine/arginine repetitive matrix protein 2                  |
| Gene_Symbol=SSB Lupus La protein                                                            |
| Gene_Symbol=SSRP1 FACT complex subunit SSRP1                                                |
| Gene_Symbol=STAU1 Isoform Long of Double-stranded RNA-binding protein Staufen homolog 1     |
| Gene_Symbol=STC1 Stanniocalcin-1 precursor                                                  |
| Gene_Symbol=STCH Stress 70 protein chaperone microsomal-associated 60 kDa protein precursor |
| Gene_Symbol=STIP1 Stress-induced-phosphoprotein 1                                           |
| Gene_Symbol=STMN1 Stathmin                                                                  |
| Gene_Symbol=STRAP Serine-threonine kinase receptor-associated protein                       |
| Gene_Symbol=SUB1 Activated RNA polymerase II transcriptional coactivator p15                |
| Gene_Symbol=SUMF2 Isoform 1 of Sulfatase-modifying factor 2 precursor                       |
| Gene_Symbol=SUPT16H FACT complex subunit SPT16                                              |
| Gene_Symbol=SVEP1 polydom                                                                   |
| Gene_Symbol=SWAP70 Switch-associated protein 70                                             |
| Gene_Symbol=SYNCRIP Isoform 1 of Heterogeneous nuclear ribonucleoprotein Q                  |
| Gene_Symbol=TAGLN2;CCDC19 Transgelin-2                                                      |
| Gene_Symbol=TARDBP TAR DNA-binding protein 43                                               |
| Gene_Symbol=TARS Threonyl-tRNA synthetase, cytoplasmic                                      |
| Gene_Symbol=TBCA Tubulin-specific chaperone A                                               |
| Gene_Symbol=TBCB Tubulin-specific chaperone B                                               |
| Gene_Symbol=TCEB2 Transcription elongation factor B polypeptide 2                           |
| Gene_Symbol=TFG Protein TFG                                                                 |
| Gene_Symbol=TFPI Isoform Alpha of Tissue factor pathway inhibitor precursor                 |
| Gene_Symbol=TFPI2 Tissue factor pathway inhibitor 2 precursor                               |
| Gene_Symbol=TFRC Transferrin receptor protein 1                                             |
| Gene_Symbol=TGFB1 Transforming growth factor beta-1 precursor                               |
| Gene_Symbol=TGFB2 Isoform A of Transforming growth factor beta-2 precursor                  |
| Gene_Symbol=TGFB3 transforming growth factor, beta receptor III                             |
| Gene_Symbol=TGM2 Isoform 1 of Protein-glutamine gamma-glutamyltransferase 2                 |
| Gene_Symbol=THBS1 Thrombospondin-1 precursor                                                |
| Gene_Symbol=THBS3 Thrombospondin-3 precursor                                                |
| Gene_Symbol=THOC4 THO complex subunit 4                                                     |
| Gene_Symbol=THRAP3 Thyroid hormone receptor-associated protein 3                            |
| Gene_Symbol=THSD4 thrombospondin, type I, domain containing 4                               |
| Gene_Symbol=TIMM8A Mitochondrial import inner membrane translocase subunit Tim8 A           |
| Gene_Symbol=TIMP1 Metalloproteinase inhibitor 1 precursor                                   |
| Gene_Symbol=TIMP2 22 kDa protein                                                            |
| Gene_Symbol=TKT Transketolase variant (Fragment)                                            |
| Gene_Symbol=TLN1 Talin-1                                                                    |
| Gene_Symbol=TMEM4 Isoform 1 of MIR-interacting saposin-like protein precursor               |
| Gene_Symbol=TMPO Isoform Beta of Lamina-associated polypeptide 2, isoforms beta/gamma       |
| Gene_Symbol=TMPO Lamina-associated polypeptide 2 isoform alpha                              |
| Gene_Symbol=TNC Isoform 1 of Tenascin precursor                                             |
| Gene_Symbol=TNFRSF11B Tumor necrosis factor receptor superfamily member 11B precursor       |
| Gene_Symbol=TNFRSF19L Tumor necrosis factor receptor superfamily member 19L precursor       |
| Gene_Symbol=TNFRSF1A Tumor necrosis factor receptor superfamily member 1A precursor         |
| Gene_Symbol=TOP2A 183 kDa protein                                                           |
| Gene_Symbol=TOR1B Torsin B precursor                                                        |
| Gene_Symbol=TP53BP1 Isoform 1 of Tumor suppressor p53-binding protein 1                     |
| Gene_Symbol=TPD52L2 Isoform 1 of Tumor protein D54                                          |
| Gene_Symbol=TPI1 Triosephosphate isomerase 1 variant                                        |
| Gene_Symbol=TPM1 Isoform 1 of Tropomyosin-1 alpha chain                                     |
| Gene_Symbol=TPM2 Isoform 2 of Tropomyosin beta chain                                        |
| Gene_Symbol=TPM3 29 kDa protein                                                             |
| Gene_Symbol=TPM4 Isoform 1 of Tropomyosin alpha-4 chain                                     |
| Gene_Symbol=PPP1 Isoform 1 of Tripeptidyl-peptidase 1 precursor                             |
| Gene_Symbol=TPR Nucleoprotein TPR                                                           |
| Gene_Symbol=TPT1 Tumor protein, translationally-controlled 1                                |
| Gene_Symbol=TPX2 Hepatocellular carcinoma-associated antigen 90                             |

|                                                                                        |
|----------------------------------------------------------------------------------------|
| Gene_Symbol=TRIM28 Isoform 1 of Transcription intermediary factor 1-beta               |
| Gene_Symbol=TSKU Tsukushi precursor                                                    |
| Gene_Symbol=TSN Translin                                                               |
| Gene_Symbol=TUBA1A Tubulin alpha-3 chain                                               |
| Gene_Symbol=TUBA1B 46 kDa protein                                                      |
| Gene_Symbol=TUBB Tubulin beta chain                                                    |
| Gene_Symbol=TUBB2C Tubulin beta-2C chain                                               |
| Gene_Symbol=TUBB3 Tubulin beta-3 chain                                                 |
| Gene_Symbol=TUBB4 Tubulin beta-4 chain                                                 |
| Gene_Symbol=TUBB6 46 kDa protein                                                       |
| Gene_Symbol=TWf1 twinfilin 1                                                           |
| Gene_Symbol=TWSG1 Isoform 1 of Twisted gastrulation protein homolog 1 precursor        |
| Gene_Symbol=TXN Thioredoxin                                                            |
| Gene_Symbol=TXNDC12 Thioredoxin domain-containing protein 12 precursor                 |
| Gene_Symbol=TXNL2 Thioredoxin-like protein 2                                           |
| Gene_Symbol=TXNL5 Thioredoxin-like protein 5                                           |
| Gene_Symbol=U2AF2 Splicing factor U2AF 65 kDa subunit                                  |
| Gene_Symbol=UBAP2L Ubiquitin associated protein 2-like                                 |
| Gene_Symbol=UBE1 Ubiquitin-activating enzyme E1                                        |
| Gene_Symbol=UBE2L3 Ubiquitin-conjugating enzyme E2 L3                                  |
| Gene_Symbol=UBE2N Ubiquitin-conjugating enzyme E2 N                                    |
| Gene_Symbol=UBE2V1;Kua-UEV Isoform 1 of Ubiquitin-conjugating enzyme E2 variant 1      |
| Gene_Symbol=UBQLN1 Isoform 2 of Ubiquilin-1                                            |
| Gene_Symbol=UCHL1 Ubiquitin carboxyl-terminal hydrolase isozyme L1                     |
| Gene_Symbol=UFD1L ubiquitin fusion degradation 1-like isoform B                        |
| Gene_Symbol=UPF1 Isoform 1 of Regulator of nonsense transcripts 1                      |
| Gene_Symbol=USP14 Ubiquitin carboxyl-terminal hydrolase 14                             |
| Gene_Symbol=USP5 Isoform Short of Ubiquitin carboxyl-terminal hydrolase 5              |
| Gene_Symbol=UTP14A Isoform 1 of U3 small nucleolar RNA-associated protein 14 homolog A |
| Gene_Symbol=VAPA Vesicle-associated membrane protein-associated protein A              |
| Gene_Symbol=VAT1 Synaptic vesicle membrane protein VAT-1 homolog                       |
| Gene_Symbol=VBP1 Von Hippel-Lindau binding protein 1                                   |
| Gene_Symbol=VCL Isoform 1 of Vinculin                                                  |
| Gene_Symbol=VCP Transitional endoplasmic reticulum ATPase                              |
| Gene_Symbol=VGF VGF nerve growth factor inducible precursor                            |
| Gene_Symbol=VIL2 Ezrin                                                                 |
| Gene_Symbol=VIM Vimentin                                                               |
| Gene_Symbol=WARS Tryptophanyl-tRNA synthetase, cytoplasmic                             |
| Gene_Symbol=WDR1 Isoform 1 of WD repeat protein 1                                      |
| Gene_Symbol=WDR77 Methylosome protein 50                                               |
| Gene_Symbol=XPO1 Exportin-1                                                            |
| Gene_Symbol=XRCC5 ATP-dependent DNA helicase 2 subunit 2                               |
| Gene_Symbol=XRCC6 70 kDa protein                                                       |
| Gene_Symbol=XTP3TPA CDNA: FLJ211190 fis, clone CAS12333                                |
| Gene_Symbol=XYL2 Isoform 1 of Xylosyltransferase 2                                     |
| Gene_Symbol=YAP1 YAP1 protein                                                          |
| Gene_Symbol=YARS Tyrosyl-tRNA synthetase, cytoplasmic                                  |
| Gene_Symbol=YBX1 35 kDa protein                                                        |
| Gene_Symbol=YKT6 Synaptobrevin homolog YKT6                                            |
| Gene_Symbol=YWHAB Isoform Long of 14-3-3 protein beta/alpha                            |
| Gene_Symbol=YWHAE 14-3-3 protein epsilon                                               |
| Gene_Symbol=YWHAG 14-3-3 protein gamma                                                 |
| Gene_Symbol=YWHAH 14-3-3 protein eta                                                   |
| Gene_Symbol=YWHAQ 14-3-3 protein theta                                                 |
| Gene_Symbol=YWHAZ 14-3-3 protein zeta/delta                                            |

CM of the 3 replicates (Rep1-3) of H23 from Mascot and X! Tandem search

| Number of similar matches | Accession numbers                               | Mass weight (AMU) | H23-Rep1 (CRL5800-S1-F) |
|---------------------------|-------------------------------------------------|-------------------|-------------------------|
| 1                         | IPI00794900                                     | 105381            | 100%                    |
| 1                         | IPI00647593                                     | 23284.1           | 0                       |
| 1                         | IPI00738677                                     | 34778.2           | 0                       |
| 1                         | IPI00795769                                     | 51765.4           | 0                       |
| 1                         | IPI00175126                                     | 64161.5           | 100%                    |
| 2                         | IPI00020513,IPI00797866                         | 67266             | 100%                    |
| 1                         | IPI00783641                                     | 71135.5           | 100%                    |
| 1                         | IPI00785057                                     | 48889.5           | 0                       |
| 1                         | IPI00472724                                     | 50167.4           | 100%                    |
| 1                         | IPI00419827                                     | 50512.6           | 100%                    |
| 1                         | IPI00382617                                     | 31463.9           | 100%                    |
| 4                         | IPI00013495,IPI00302146,IPI00642960,IPI00792186 | 91664.6           | 71%                     |
| 2                         | IPI00063827,IPI00747859                         | 22328             | 0                       |
| 1                         | IPI00007334                                     | 151869.9          | 100%                    |
| 1                         | IPI00394838                                     | 119757.6          | 100%                    |
| 1                         | IPI00021290                                     | 120824.8          | 0                       |
| 1                         | IPI00021428                                     | 42034.1           | 0                       |
| 1                         | IPI00021439                                     | 41719.8           | 100%                    |
| 1                         | IPI00013508                                     | 103043.1          | 100%                    |
| 1                         | IPI00013808                                     | 104839.2          | 100%                    |
| 1                         | IPI00470573                                     | 45359.5           | 0                       |
| 1                         | IPI00028091                                     | 47353.8           | 100%                    |
| 1                         | IPI00296441                                     | 40747.1           | 71%                     |
| 1                         | IPI00013897                                     | 84125             | 71%                     |
| 1                         | IPI00288894                                     | 93003.9           | 100%                    |
| 3                         | IPI00440932,IPI00440933,IPI00747759             | 90538.1           | 100%                    |
| 1                         | IPI00651738                                     | 21481.2           | 0                       |
| 2                         | IPI00033030,IPI00470921                         | 42136.2           | 0                       |
| 1                         | IPI00374563                                     | 214820            | 100%                    |
| 1                         | IPI00012007                                     | 47699.1           | 30%                     |
| 1                         | IPI00555610                                     | 312519.1          | 100%                    |
| 1                         | IPI00030706                                     | 38256.4           | 100%                    |
| 2                         | IPI00000690,IPI00157908                         | 66883.5           | 100%                    |
| 1                         | IPI00010460                                     | 37646.6           | 71%                     |
| 2                         | IPI00215901,IPI00218988                         | 26461             | 100%                    |
| 1                         | IPI00217683                                     | 181664.1          | 100%                    |
| 1                         | IPI00237884                                     | 191413.6          | 0                       |
| 1                         | IPI00413641                                     | 35835.9           | 100%                    |
| 1                         | IPI00465439                                     | 39402.6           | 100%                    |
| 2                         | IPI00153060,IPI00740170                         | 45196             | 71%                     |
| 3                         | IPI00032958,IPI00657687,IPI00743594             | 120000.5          | 0                       |
| 2                         | IPI00025849,IPI00449263                         | 28568.1           | 100%                    |
| 2                         | IPI00007423,IPI00759824                         | 28770.6           | 71%                     |
| 2                         | IPI00165393,IPI00640833                         | 30675.3           | 71%                     |
| 1                         | IPI00218918                                     | 38697.9           | 100%                    |
| 1                         | IPI00414320                                     | 54373.7           | 0                       |
| 1                         | IPI00418169                                     | 40395.3           | 100%                    |
| 1                         | IPI00329801                                     | 35920.6           | 100%                    |
| 1                         | IPI00337741                                     | 81206.1           | 71%                     |
| 1                         | IPI00215911                                     | 35537.7           | 100%                    |
| 2                         | IPI00020012,IPI00796118                         | 72158             | 0                       |
| 2                         | IPI00031030,IPI00220978                         | 86937             | 100%                    |
| 1                         | IPI00168479                                     | 31657.4           | 100%                    |
| 1                         | IPI00021842                                     | 36135.5           | 100%                    |
| 4                         | IPI00006608,IPI00219187,IPI00412681,IPI00412924 | 86923.3           | 100%                    |
| 1                         | IPI00215914                                     | 20679.6           | 0                       |
| 1                         | IPI00215917                                     | 20583.7           | 100%                    |
| 2                         | IPI00003815,IPI00796541                         | 23189.5           | 71%                     |
| 1                         | IPI00328748                                     | 26886.4           | 71%                     |
| 2                         | IPI00005160,IPI00737530                         | 40931.8           | 0                       |

|   |                                     |          |      |
|---|-------------------------------------|----------|------|
| 1 | IPI00790262                         | 71702.1  | 0    |
| 1 | IPI00165949                         | 107826.4 | 100% |
| 1 | IPI00420014                         | 244495.8 | 71%  |
| 1 | IPI00289499                         | 64598.5  | 100% |
| 1 | IPI00010863                         | 7383.7   | 0    |
| 3 | IPI00020430,IPI00784119,IPI00794988 | 52592.9  | 100% |
| 1 | IPI00168884                         | 38991.1  | 100% |
| 1 | IPI00007812                         | 56484.1  | 71%  |
| 1 | IPI00641829                         | 50662.1  | 100% |
| 2 | IPI00296992,IPI00397361             | 98317.2  | 71%  |
| 2 | IPI00004656,IPI00796379             | 13696.9  | 100% |
| 1 | IPI00477470                         | 37810.1  | 71%  |
| 1 | IPI00217345                         | 45467.9  | 71%  |
| 1 | IPI00215767                         | 43903    | 71%  |
| 1 | IPI00299024                         | 22675.3  | 100% |
| 2 | IPI00006079,IPI00413671             | 106107.3 | 100% |
| 2 | IPI00010790,IPI00643384             | 41637.9  | 100% |
| 1 | IPI00301434                         | 16914.1  | 71%  |
| 3 | IPI00019906,IPI00218019,IPI00795150 | 29203.1  | 100% |
| 1 | IPI00218413                         | 61115.4  | 100% |
| 1 | IPI00419473                         | 17681.4  | 100% |
| 1 | IPI00006907                         | 30045.1  | 0    |
| 1 | IPI00292150                         | 195038.5 | 71%  |
| 1 | IPI00009922                         | 12331    | 100% |
| 1 | IPI00792100                         | 27952.1  | 100% |
| 1 | IPI00479767                         | 667830.2 | 100% |
| 1 | IPI00056357                         | 18776.9  | 0    |
| 1 | IPI00014230                         | 31344.6  | 100% |
| 1 | IPI00296165                         | 80156.7  | 0    |
| 2 | IPI00009793,IPI00795055             | 53465.4  | 0    |
| 1 | IPI00009659                         | 36882.8  | 71%  |
| 2 | IPI00295519,IPI00607570             | 64535.4  | 71%  |
| 1 | IPI00007926                         | 19090.3  | 13%  |
| 1 | IPI00031564                         | 20990    | 0    |
| 1 | IPI00218414                         | 29228.6  | 0    |
| 3 | IPI00395627,IPI00552308,IPI00745851 | 26192.3  | 100% |
| 1 | IPI00301263                         | 242964.5 | 71%  |
| 2 | IPI00218696,IPI00333771             | 62646    | 100% |
| 3 | IPI00075248,IPI00386621,IPI00794543 | 16820    | 100% |
| 1 | IPI00020599                         | 48124.9  | 100% |
| 1 | IPI00789155                         | 38033.9  | 0    |
| 2 | IPI00100160,IPI00604431             | 136363.1 | 100% |
| 1 | IPI00103175                         | 44822.1  | 100% |
| 1 | IPI00020984                         | 67552.2  | 71%  |
| 1 | IPI00008274                         | 51837.5  | 100% |
| 1 | IPI00011285                         | 81874.6  | 0    |
| 1 | IPI00005969                         | 32905.1  | 100% |
| 1 | IPI00026182                         | 32931.2  | 0    |
| 2 | IPI00218782,IPI00642256             | 33764.2  | 0    |
| 1 | IPI00304409                         | 15873.6  | 100% |
| 1 | IPI00027443                         | 94622.2  | 100% |
| 1 | IPI00295386                         | 30356.8  | 71%  |
| 1 | IPI00010320                         | 21400.1  | 0    |
| 1 | IPI00297579                         | 20794    | 100% |
| 1 | IPI00009308                         | 11007.3  | 100% |
| 1 | IPI00297779                         | 57471.9  | 100% |
| 3 | IPI00290770,IPI00553185,IPI00744315 | 60446.3  | 100% |
| 1 | IPI00302927                         | 57908    | 100% |
| 1 | IPI00010720                         | 59654.3  | 100% |
| 1 | IPI00027626                         | 58007.3  | 100% |
| 1 | IPI00018465                         | 59349.8  | 100% |
| 2 | IPI00302925,IPI00784090             | 59761.2  | 100% |
| 1 | IPI00152540                         | 161674.2 | 100% |



|   |                                                  |          |      |
|---|--------------------------------------------------|----------|------|
| 1 | IPI00029260                                      | 40058.6  | 51%  |
| 2 | IPI00012788,IPI00645816                          | 55153.7  | 71%  |
| 8 | IPI00305064,IPI00418465,IPI00827555,IPI00827650, | 76609.9  | 100% |
| 3 | IPI00215997,IPI00657796,IPI00795937              | 25399    | 100% |
| 1 | IPI00013122                                      | 44450.2  | 100% |
| 1 | IPI00465294                                      | 92236.2  | 100% |
| 2 | IPI00025861,IPI00744889                          | 97439.6  | 100% |
| 1 | IPI00293539                                      | 76523.6  | 100% |
| 3 | IPI00216677,IPI00645614,IPI00747243              | 91410.1  | 71%  |
| 2 | IPI00014197,IPI00798278                          | 27316.7  | 0    |
| 1 | IPI00012011                                      | 18485.2  | 100% |
| 1 | IPI00006601                                      | 78228.1  | 100% |
| 2 | IPI00301185,IPI00306719                          | 47597.8  | 100% |
| 2 | IPI00099831,IPI00554485                          | 41537.6  | 0    |
| 1 | IPI00216780                                      | 126838.6 | 0    |
| 1 | IPI00022977                                      | 42627.1  | 71%  |
| 1 | IPI00658109                                      | 47020    | 0    |
| 1 | IPI00033466                                      | 35676.4  | 100% |
| 1 | IPI00010896                                      | 26905.3  | 100% |
| 2 | IPI00291930,IPI00397519                          | 68242.5  | 71%  |
| 3 | IPI00013455,IPI00027172,IPI00217113              | 162231.6 | 0    |
| 1 | IPI00007257                                      | 108623.5 | 100% |
| 1 | IPI00413959                                      | 109773.6 | 98%  |
| 1 | IPI00747063                                      | 106080.2 | 100% |
| 1 | IPI00455383                                      | 187876.8 | 100% |
| 3 | IPI00291262,IPI00400826,IPI00795633              | 52477    | 100% |
| 1 | IPI00430813                                      | 18723.3  | 0    |
| 2 | IPI00177728,IPI00646632                          | 52861.7  | 100% |
| 1 | IPI00015262                                      | 33679.6  | 100% |
| 1 | IPI00827558                                      | 315848.4 | 100% |
| 1 | IPI00329573                                      | 333174.2 | 0    |
| 1 | IPI00748917                                      | 144891.6 | 0    |
| 1 | IPI00291136                                      | 108513   | 100% |
| 2 | IPI00220613,IPI00304840                          | 97402.5  | 71%  |
| 2 | IPI00295857,IPI00646493                          | 138317.2 | 71%  |
| 1 | IPI00007058                                      | 54216.9  | 100% |
| 1 | IPI00008453                                      | 53232.3  | 71%  |
| 1 | IPI00017704                                      | 15927.2  | 100% |
| 2 | IPI00216085,IPI00797738                          | 10174.3  | 100% |
| 1 | IPI00031121                                      | 63657.9  | 100% |
| 1 | IPI00640372                                      | 58616.2  | 71%  |
| 1 | IPI00030654                                      | 63454.5  | 0    |
| 1 | IPI00301395                                      | 54147.5  | 100% |
| 1 | IPI00027839                                      | 21404.4  | 0    |
| 1 | IPI00009294                                      | 113716.8 | 100% |
| 1 | IPI00004838                                      | 33853.8  | 98%  |
| 1 | IPI00305469                                      | 22887.9  | 98%  |
| 1 | IPI00004839                                      | 33759.3  | 100% |
| 2 | IPI00031801,IPI00219148                          | 40071.4  | 0    |
| 2 | IPI00398121,IPI00470891                          | 90537.4  | 100% |
| 2 | IPI00022744,IPI00219994                          | 110403.9 | 100% |
| 1 | IPI00442073                                      | 20549.1  | 100% |
| 1 | IPI00032293                                      | 15781.2  | 100% |
| 1 | IPI00021828                                      | 11121.3  | 71%  |
| 2 | IPI00011528,IPI00644499                          | 48340.5  | 71%  |
| 1 | IPI00007778                                      | 43742.8  | 0    |
| 2 | IPI00215948,IPI00473136                          | 100054.9 | 0    |
| 3 | IPI00017292,IPI00787027,IPI00787237              | 85479    | 0    |
| 1 | IPI00290142                                      | 66672.7  | 100% |
| 3 | IPI00021794,IPI00640525,IPI00791457              | 61841.2  | 100% |
| 1 | IPI00295741                                      | 37803.2  | 100% |
| 1 | IPI00022810                                      | 51824.3  | 71%  |
| 1 | IPI00011229                                      | 44535    | 100% |

|   |                                                 |          |      |
|---|-------------------------------------------------|----------|------|
| 1 | IPI00012887                                     | 37546.1  | 100% |
| 1 | IPI00000013                                     | 37311.2  | 100% |
| 1 | IPI00002745                                     | 33850.2  | 100% |
| 2 | IPI00029601,IPI00062884                         | 61743.7  | 100% |
| 3 | IPI00014312,IPI00382458,IPI00382459             | 88914.1  | 100% |
| 3 | IPI00034319,IPI00554556,IPI00554634             | 20906.9  | 100% |
| 1 | IPI00013874                                     | 11283.7  | 100% |
| 1 | IPI00465315                                     | 11731.4  | 100% |
| 1 | IPI00006273                                     | 37228.1  | 100% |
| 1 | IPI00044326                                     | 42980    | 99%  |
| 1 | IPI00028911                                     | 97563.3  | 100% |
| 1 | IPI00216951                                     | 57118.7  | 0    |
| 3 | IPI00010182,IPI00218836,IPI00815745             | 10026.8  | 100% |
| 1 | IPI00003406                                     | 71406.5  | 0    |
| 1 | IPI00295624                                     | 71579.7  | 100% |
| 3 | IPI00220503,IPI00789792,IPI00793544             | 44802.3  | 100% |
| 3 | IPI00293464,IPI00784120,IPI00786914             | 126952.2 | 100% |
| 3 | IPI00001477,IPI00219996,IPI00657861             | 101111.7 | 0    |
| 1 | IPI00293867                                     | 12694.2  | 100% |
| 1 | IPI00293655                                     | 82415.2  | 100% |
| 1 | IPI00015953                                     | 87328    | 71%  |
| 1 | IPI00409671                                     | 102958.9 | 0    |
| 1 | IPI00017617                                     | 69131.7  | 71%  |
| 1 | IPI00306280                                     | 22267.7  | 100% |
| 1 | IPI00010882                                     | 36504.5  | 0    |
| 1 | IPI00742905                                     | 146459   | 100% |
| 1 | IPI00003269                                     | 41986.2  | 0    |
| 1 | IPI00016353                                     | 28653.1  | 100% |
| 1 | IPI00012535                                     | 44850.6  | 71%  |
| 1 | IPI00003438                                     | 29824.2  | 100% |
| 2 | IPI00146935,IPI00235412                         | 81861.2  | 0    |
| 1 | IPI00171856                                     | 32886.1  | 0    |
| 1 | IPI00020672                                     | 82573.6  | 71%  |
| 1 | IPI00257508                                     | 62276    | 0    |
| 1 | IPI00028931                                     | 122276.4 | 100% |
| 1 | IPI00473014                                     | 18488.2  | 71%  |
| 1 | IPI00749113                                     | 26545.8  | 100% |
| 1 | IPI00477531                                     | 532346.6 | 100% |
| 1 | IPI00019329                                     | 10348.1  | 71%  |
| 1 | IPI00745955                                     | 40667.4  | 71%  |
| 1 | IPI00011416                                     | 35798.2  | 71%  |
| 2 | IPI00306046,IPI00399105                         | 53747    | 71%  |
| 1 | IPI00396485                                     | 50123.2  | 0    |
| 1 | IPI00014424                                     | 50452.6  | 100% |
| 1 | IPI00178440                                     | 24746.2  | 100% |
| 1 | IPI00642971                                     | 71390.3  | 100% |
| 2 | IPI00000875,IPI00747497                         | 50101.4  | 100% |
| 1 | IPI00186290                                     | 95322.1  | 100% |
| 4 | IPI00029658,IPI00220813,IPI00220814,IPI00220815 | 54621.1  | 100% |
| 1 | IPI00025840                                     | 23769.2  | 100% |
| 1 | IPI00024307                                     | 37989.4  | 99%  |
| 1 | IPI00003519                                     | 109420.1 | 100% |
| 1 | IPI00028381                                     | 40527.6  | 0    |
| 1 | IPI00015077                                     | 12714.9  | 71%  |
| 1 | IPI00219678                                     | 36094.7  | 100% |
| 2 | IPI00021728,IPI00793912                         | 38371.7  | 100% |
| 1 | IPI00297982                                     | 51092.2  | 0    |
| 1 | IPI00290461                                     | 29045.3  | 71%  |
| 1 | IPI00290460                                     | 35594    | 100% |
| 1 | IPI00013068                                     | 52204.6  | 71%  |
| 1 | IPI00747447                                     | 99084.7  | 100% |
| 2 | IPI00025491,IPI00555602                         | 46137.3  | 100% |
| 2 | IPI00012079,IPI00439415                         | 69208.8  | 100% |

|   |                                                  |          |      |
|---|--------------------------------------------------|----------|------|
| 1 | IPI00386533                                      | 154870.3 | 100% |
| 1 | IPI00376005                                      | 20152.9  | 100% |
| 1 | IPI00299254                                      | 138786.3 | 71%  |
| 1 | IPI00301936                                      | 36074.6  | 71%  |
| 1 | IPI00001466                                      | 108886.2 | 100% |
| 1 | IPI00465248                                      | 47152.2  | 100% |
| 1 | IPI00216171                                      | 47251.7  | 0    |
| 2 | IPI00038378,IPI00795241                          | 28914.4  | 71%  |
| 9 | IPI00220797,IPI00383552,IPI00410177,IPI00410178, | 12958.1  | 100% |
| 1 | IPI00745296                                      | 108248.8 | 71%  |
| 1 | IPI00013452                                      | 170575.2 | 100% |
| 6 | IPI00163849,IPI00645613,IPI00646339,IPI00794004, | 94240.3  | 100% |
| 1 | IPI00029631                                      | 12241.3  | 100% |
| 1 | IPI00024911                                      | 28976.9  | 100% |
| 2 | IPI00009841,IPI00065554                          | 68947.8  | 71%  |
| 1 | IPI00293128                                      | 86239.4  | 71%  |
| 2 | IPI00004047,IPI00414468                          | 82238    | 0    |
| 1 | IPI00218038                                      | 27389.5  | 0    |
| 2 | IPI00021923,IPI00334282                          | 24662.9  | 100% |
| 1 | IPI00030098                                      | 40224.8  | 100% |
| 2 | IPI00026781,IPI00645907                          | 273382   | 100% |
| 1 | IPI00031411                                      | 506925.3 | 71%  |
| 1 | IPI00296537                                      | 74441.9  | 100% |
| 1 | IPI00296534                                      | 77240.8  | 100% |
| 2 | IPI00023824,IPI00465038                          | 126521.6 | 100% |
| 1 | IPI00784458                                      | 312207   | 0    |
| 2 | IPI00101405,IPI00797614                          | 48258.8  | 47%  |
| 5 | IPI00021048,IPI00216269,IPI00645867,IPI00790914, | 234697.6 | 100% |
| 2 | IPI00014398,IPI00647207                          | 33559.3  | 100% |
| 2 | IPI00396967,IPI00743342                          | 44159    | 0    |
| 2 | IPI00395337,IPI00657863                          | 66508.9  | 71%  |
| 1 | IPI00413778                                      | 15670.9  | 71%  |
| 1 | IPI00024157                                      | 25159.4  | 100% |
| 1 | IPI00219005                                      | 51787.9  | 100% |
| 2 | IPI00059292,IPI00219306                          | 17258.6  | 100% |
| 1 | IPI00002408                                      | 75704.3  | 71%  |
| 1 | IPI00333541                                      | 280711.4 | 100% |
| 6 | IPI00289334,IPI00382696,IPI00382697,IPI00382700, | 278171.9 | 100% |
| 1 | IPI00180707                                      | 351136.8 | 71%  |
| 1 | IPI00163187                                      | 54512.3  | 0    |
| 1 | IPI00029723                                      | 34967.3  | 100% |
| 1 | IPI00025155                                      | 27643.9  | 100% |
| 2 | IPI00008087,IPI00745676                          | 95734.2  | 0    |
| 3 | IPI00375441,IPI00644386,IPI00788671              | 67542.6  | 100% |
| 1 | IPI00260715                                      | 53359.1  | 100% |
| 1 | IPI00554715                                      | 60744.8  | 100% |
| 1 | IPI00012442                                      | 52144.8  | 71%  |
| 1 | IPI00760751                                      | 62451.7  | 100% |
| 1 | IPI00293088                                      | 105844.1 | 100% |
| 1 | IPI00029605                                      | 58009.4  | 0    |
| 1 | IPI00004669                                      | 64715.1  | 100% |
| 1 | IPI00026991                                      | 71141.3  | 0    |
| 1 | IPI00011454                                      | 109422.2 | 100% |
| 1 | IPI00219018                                      | 36035.3  | 100% |
| 1 | IPI00783097                                      | 77514    | 100% |
| 1 | IPI00025273                                      | 107750.4 | 0    |
| 1 | IPI00103554                                      | 65243.7  | 0    |
| 1 | IPI00021807                                      | 59699.7  | 0    |
| 1 | IPI00306543                                      | 34150.9  | 100% |
| 1 | IPI00010154                                      | 50566.1  | 0    |
| 1 | IPI00031461                                      | 50647.5  | 100% |
| 1 | IPI00023728                                      | 35947.8  | 100% |
| 1 | IPI00025869                                      | 48750.3  | 100% |

|    |                                                  |          |      |
|----|--------------------------------------------------|----------|------|
| 2  | IPI00414717,IPI00641153                          | 137205.8 | 0    |
| 1  | IPI00220766                                      | 20760.8  | 100% |
| 1  | IPI00007102                                      | 54995.3  | 0    |
| 1  | IPI00168262                                      | 71619.7  | 99%  |
| 1  | IPI00018236                                      | 20804.9  | 100% |
| 2  | IPI00412987,IPI00549557                          | 16695.6  | 71%  |
| 1  | IPI00029079                                      | 76698.7  | 71%  |
| 1  | IPI00641950                                      | 37871.3  | 0    |
| 1  | IPI00009305                                      | 32651.4  | 0    |
| 2  | IPI00550894,IPI00744859                          | 31067.7  | 100% |
| 1  | IPI00012102                                      | 62066    | 100% |
| 3  | IPI00171411,IPI00759659,IPI00784293              | 46254.7  | 71%  |
| 2  | IPI00031241,IPI00743931                          | 39750.8  | 100% |
| 1  | IPI00219029                                      | 46230.1  | 100% |
| 1  | IPI00018206                                      | 47458.6  | 71%  |
| 1  | IPI00015688                                      | 61633.3  | 100% |
| 1  | IPI00027497                                      | 63130.5  | 100% |
| 2  | IPI00150961,IPI00783872                          | 78346.4  | 71%  |
| 1  | IPI00651640                                      | 133685.8 | 100% |
| 1  | IPI00006166                                      | 67097.6  | 71%  |
| 1  | IPI00037448                                      | 35651.1  | 0    |
| 1  | IPI00550682                                      | 36806.7  | 71%  |
| 1  | IPI00296713                                      | 63522    | 100% |
| 1  | IPI00026314                                      | 85679.8  | 100% |
| 1  | IPI00010706                                      | 52367.9  | 71%  |
| 2  | IPI00019755,IPI00642936                          | 27549.2  | 71%  |
| 1  | IPI00219757                                      | 23338.7  | 100% |
| 1  | IPI00290416                                      | 44727.4  | 100% |
| 2  | IPI00018278,IPI00218448                          | 13491.2  | 0    |
| 2  | IPI00219038,IPI00413826                          | 15310.7  | 71%  |
| 1  | IPI00021808                                      | 57394.5  | 100% |
| 2  | IPI00453476,IPI00549725                          | 28832.9  | 100% |
| 1  | IPI00289601                                      | 65521.5  | 71%  |
| 1  | IPI00514127                                      | 28246.4  | 100% |
| 2  | IPI00027851,IPI00829779                          | 60671.8  | 100% |
| 1  | IPI00012585                                      | 63095.3  | 100% |
| 1  | IPI00239077                                      | 13784.1  | 98%  |
| 1  | IPI00217465                                      | 21347.8  | 0    |
| 1  | IPI00217466                                      | 22333.3  | 0    |
| 2  | IPI00045109,IPI00219037                          | 14216.2  | 100% |
| 8  | IPI00081836,IPI00102165,IPI00216457,IPI00220855, | 13888.8  | 100% |
| 12 | IPI00018534,IPI00020101,IPI00152906,IPI00303133, | 13934.7  | 71%  |
| 1  | IPI00465070                                      | 15386.7  | 0    |
| 1  | IPI00453473                                      | 11349.7  | 100% |
| 5  | IPI00003935,IPI00152785,IPI00166293,IPI00220403, | 13902.7  | 100% |
| 2  | IPI00171611,IPI00719351                          | 15370.7  | 0    |
| 1  | IPI00472736                                      | 40773.7  | 100% |
| 11 | IPI00471955,IPI00472284,IPI00472456,IPI00646083, | 40523.2  | 71%  |
| 1  | IPI00472605                                      | 41076.3  | 0    |
| 1  | IPI00651697                                      | 40842.3  | 71%  |
| 1  | IPI00473131                                      | 40950.3  | 100% |
| 2  | IPI00028160,IPI00219877                          | 39312.5  | 100% |
| 4  | IPI00419258,IPI00644653,IPI00645948,IPI00815806  | 24876.7  | 100% |
| 1  | IPI00384857                                      | 19898.4  | 100% |
| 1  | IPI00011913                                      | 30822.5  | 100% |
| 1  | IPI00215965                                      | 38828.1  | 100% |
| 1  | IPI00396378                                      | 37412.3  | 100% |
| 1  | IPI00419373                                      | 39577.1  | 100% |
| 1  | IPI00334713                                      | 30570.2  | 100% |
| 1  | IPI00216592                                      | 32320    | 100% |
| 1  | IPI00045498                                      | 27174.1  | 0    |
| 1  | IPI00479191                                      | 51212.1  | 100% |
| 4  | IPI00013877,IPI00216492,IPI00216493,IPI00216494  | 36909.6  | 100% |

|   |                                                  |          |      |
|---|--------------------------------------------------|----------|------|
| 3 | IPI00216049,IPI00216746,IPI00807545              | 50960.5  | 100% |
| 2 | IPI00027834,IPI00796199                          | 64114.8  | 100% |
| 1 | IPI00383296                                      | 73604.5  | 71%  |
| 1 | IPI00012074                                      | 70925.8  | 71%  |
| 1 | IPI00644079                                      | 90567.2  | 100% |
| 1 | IPI00479217                                      | 88962.3  | 0    |
| 1 | IPI00218493                                      | 24562.2  | 71%  |
| 1 | IPI00382470                                      | 98147.1  | 100% |
| 1 | IPI00414676                                      | 83249.3  | 100% |
| 1 | IPI00027230                                      | 92453.7  | 100% |
| 1 | IPI00304925                                      | 70022    | 100% |
| 1 | IPI00002966                                      | 94283    | 100% |
| 1 | IPI00003362                                      | 72405.6  | 100% |
| 1 | IPI00003865                                      | 70881.8  | 100% |
| 1 | IPI00788958                                      | 73617.2  | 100% |
| 1 | IPI00025512                                      | 22764.6  | 100% |
| 2 | IPI00472102,IPI00784154                          | 61195.9  | 100% |
| 1 | IPI00220362                                      | 10913.7  | 100% |
| 1 | IPI00024284                                      | 468787.5 | 100% |
| 1 | IPI00514983                                      | 96847.8  | 100% |
| 1 | IPI00643586                                      | 48018.9  | 0    |
| 1 | IPI00000877                                      | 111318.8 | 100% |
| 1 | IPI00644127                                      | 144944.4 | 71%  |
| 1 | IPI00008494                                      | 57806.5  | 100% |
| 1 | IPI00290456                                      | 97310.9  | 0    |
| 1 | IPI00297284                                      | 35119.1  | 100% |
| 1 | IPI00029235                                      | 25303.8  | 100% |
| 1 | IPI00016915                                      | 29111.8  | 100% |
| 1 | IPI00291987                                      | 28986.6  | 100% |
| 1 | IPI00297124                                      | 103504.9 | 71%  |
| 1 | IPI00005198                                      | 43044.7  | 100% |
| 1 | IPI00219330                                      | 74589.9  | 100% |
| 2 | IPI00009960,IPI00554469                          | 83661    | 100% |
| 1 | IPI00291510                                      | 55788.4  | 71%  |
| 2 | IPI00007402,IPI00784008                          | 119686.7 | 100% |
| 1 | IPI00009342                                      | 189240.6 | 100% |
| 5 | IPI00478861,IPI00549569,IPI00640098,IPI00644161, | 55118.1  | 16%  |
| 1 | IPI00645194                                      | 88397.1  | 100% |
| 1 | IPI00010105                                      | 26580.2  | 0    |
| 1 | IPI00031821                                      | 30321.1  | 71%  |
| 1 | IPI00307092                                      | 71481.6  | 100% |
| 1 | IPI00082310                                      | 44010    | 0    |
| 1 | IPI00479786                                      | 73097.6  | 100% |
| 2 | IPI00472754,IPI00749513                          | 116596.9 | 71%  |
| 1 | IPI00783537                                      | 102885.1 | 71%  |
| 1 | IPI00394906                                      | 69877.2  | 0    |
| 2 | IPI00002214,IPI00789457                          | 57844.5  | 100% |
| 1 | IPI00012578                                      | 57868.9  | 100% |
| 1 | IPI00001639                                      | 97153.3  | 100% |
| 1 | IPI00784347                                      | 48041    | 100% |
| 1 | IPI00554648                                      | 53688.2  | 100% |
| 2 | IPI00328753,IPI00337736                          | 156258.3 | 100% |
| 3 | IPI00027087,IPI00334532,IPI00646281              | 139985.2 | 100% |
| 1 | IPI00375294                                      | 337133.7 | 100% |
| 2 | IPI00218725,IPI00479834                          | 343497.2 | 100% |
| 1 | IPI00783665                                      | 399725.1 | 0    |
| 1 | IPI00013976                                      | 198045.3 | 100% |
| 1 | IPI00296922                                      | 196057.1 | 0    |
| 1 | IPI00298281                                      | 177587.1 | 100% |
| 1 | IPI00217966                                      | 36671.2  | 100% |
| 1 | IPI00219217                                      | 36620.6  | 100% |
| 2 | IPI00000070,IPI00792252                          | 95356.7  | 100% |
| 1 | IPI00219219                                      | 14697.8  | 100% |

|   |                                                  |          |      |
|---|--------------------------------------------------|----------|------|
| 1 | IPI00023673                                      | 65314.1  | 100% |
| 1 | IPI00293303                                      | 49393    | 100% |
| 4 | IPI00008918,IPI00220465,IPI00796222,IPI00796705  | 85208.3  | 100% |
| 1 | IPI00748567                                      | 45417.7  | 71%  |
| 1 | IPI00026530                                      | 57531.2  | 0    |
| 1 | IPI00009950                                      | 40211.5  | 100% |
| 1 | IPI00021405                                      | 74122.7  | 0    |
| 1 | IPI00216952                                      | 65118.1  | 100% |
| 1 | IPI00217975                                      | 66391.6  | 100% |
| 1 | IPI00009771                                      | 69931.4  | 100% |
| 1 | IPI00169285                                      | 65455.4  | 71%  |
| 1 | IPI00456898                                      | 14579.8  | 0    |
| 5 | IPI00217477,IPI00376756,IPI00411540,IPI00640781, | 23726.6  | 100% |
| 2 | IPI00014263,IPI00220894                          | 27368    | 71%  |
| 1 | IPI00788271                                      | 56143.6  | 0    |
| 1 | IPI00007797                                      | 15146.4  | 71%  |
| 1 | IPI00786995                                      | 465453.2 | 100% |
| 1 | IPI00028109                                      | 11231.8  | 100% |
| 1 | IPI00782994                                      | 86705.1  | 100% |
| 1 | IPI00024292                                      | 521897.7 | 0    |
| 1 | IPI00396321                                      | 34913.4  | 100% |
| 2 | IPI00006207,IPI00382733                          | 86385.2  | 100% |
| 1 | IPI00219871                                      | 10384.6  | 71%  |
| 1 | IPI00219077                                      | 69269.1  | 0    |
| 1 | IPI00514090                                      | 60687.8  | 100% |
| 1 | IPI00292657                                      | 35852.5  | 71%  |
| 1 | IPI00073196                                      | 139336.6 | 71%  |
| 1 | IPI00783492                                      | 165717.2 | 100% |
| 2 | IPI00006932,IPI00216804                          | 47488.6  | 71%  |
| 1 | IPI00303882                                      | 47027.6  | 71%  |
| 5 | IPI00256861,IPI00478226,IPI00513991,IPI00550385, | 620396.9 | 99%  |
| 1 | IPI00018042                                      | 34911    | 100% |
| 2 | IPI00009542,IPI00477809                          | 64938    | 71%  |
| 1 | IPI00008207                                      | 79563.9  | 100% |
| 1 | IPI00745518                                      | 122925.2 | 100% |
| 1 | IPI00017596                                      | 29981.5  | 100% |
| 1 | IPI00010157                                      | 43642.8  | 71%  |
| 1 | IPI00789551                                      | 99952.9  | 100% |
| 1 | IPI00397466                                      | 82035.8  | 0    |
| 1 | IPI00016334                                      | 71588.5  | 99%  |
| 1 | IPI00013214                                      | 90964.6  | 100% |
| 1 | IPI00031517                                      | 92872.6  | 71%  |
| 2 | IPI00299904,IPI00376143                          | 81291    | 71%  |
| 1 | IPI00291005                                      | 36408.9  | 100% |
| 1 | IPI00291006                                      | 35513.7  | 100% |
| 1 | IPI00010333                                      | 15567.3  | 17%  |
| 3 | IPI00029273,IPI00294528,IPI00792387              | 155511.2 | 71%  |
| 1 | IPI00789396                                      | 48331.7  | 0    |
| 2 | IPI00022621,IPI00644827                          | 20807.2  | 0    |
| 2 | IPI00002236,IPI00334005                          | 43104.9  | 100% |
| 1 | IPI00020407                                      | 84526.8  | 71%  |
| 1 | IPI00640150                                      | 42527.4  | 71%  |
| 1 | IPI00293276                                      | 12458.5  | 71%  |
| 1 | IPI00293748                                      | 55034.9  | 100% |
| 1 | IPI00306778                                      | 54600.9  | 61%  |
| 1 | IPI00005707                                      | 166637.4 | 71%  |
| 3 | IPI00033494,IPI00220573,IPI00604523              | 19762.3  | 71%  |
| 1 | IPI00219365                                      | 67803.8  | 100% |
| 1 | IPI00179589                                      | 12877.3  | 100% |
| 1 | IPI00019502                                      | 226519.5 | 100% |
| 1 | IPI00797001                                      | 18481.2  | 0    |
| 1 | IPI00743335                                      | 121666.9 | 100% |
| 2 | IPI00797126,IPI00797259                          | 94662.5  | 100% |

|   |                                                  |          |      |
|---|--------------------------------------------------|----------|------|
| 1 | IPi00008787                                      | 82149.5  | 100% |
| 4 | IPi00023860,IPi00789029,IPi00791065,IPi00793389  | 45357    | 100% |
| 4 | IPi00017763,IPi00788840,IPi00789437,IPi00798071  | 42993    | 71%  |
| 2 | IPi00306960,IPi00646656                          | 62926.2  | 0    |
| 3 | IPi00179953,IPi00219821,IPi00332499              | 85217.5  | 100% |
| 1 | IPi00604620                                      | 76597.9  | 100% |
| 1 | IPi00288941                                      | 65519.7  | 0    |
| 3 | IPi00022078,IPi00183085,IPi00783586              | 42816.9  | 0    |
| 1 | IPi00020008                                      | 9054     | 100% |
| 3 | IPi00023814,IPi00217291,IPi00472011              | 159999.1 | 0    |
| 1 | IPi00549467                                      | 30590.8  | 71%  |
| 2 | IPi00031753,IPi00220630                          | 13238.6  | 100% |
| 1 | IPi00795292                                      | 30119.3  | 100% |
| 1 | IPi00654555                                      | 92958    | 0    |
| 1 | IPi00304596                                      | 54213.6  | 100% |
| 1 | IPi00297655                                      | 265376.1 | 100% |
| 1 | IPi00011140                                      | 39142.7  | 100% |
| 1 | IPi00017672                                      | 32533.5  | 100% |
| 1 | IPi00301579                                      | 16552    | 71%  |
| 1 | IPi00026216                                      | 103261.1 | 100% |
| 1 | IPi00549248                                      | 32557.4  | 100% |
| 1 | IPi00220562                                      | 47105    | 100% |
| 1 | IPi00026946                                      | 47024    | 100% |
| 2 | IPi00012069,IPi00619966                          | 30851    | 71%  |
| 2 | IPi00100197,IPi00397571                          | 40555.2  | 100% |
| 1 | IPi00295542                                      | 53861.6  | 100% |
| 1 | IPi00009123                                      | 50206.3  | 100% |
| 1 | IPi00550746                                      | 38225.7  | 100% |
| 1 | IPi00646917                                      | 26210.1  | 71%  |
| 2 | IPi00296913,IPi00646762                          | 24309.8  | 100% |
| 2 | IPi00006196,IPi00292771                          | 236512.8 | 100% |
| 1 | IPi00009901                                      | 14460.9  | 100% |
| 4 | IPi00017841,IPi00419820,IPi00472517,IPi00550145  | 55383.3  | 100% |
| 2 | IPi00024621,IPi00607652                          | 45993.2  | 100% |
| 3 | IPi00329760,IPi00604451,IPi00784387              | 76278.4  | 0    |
| 1 | IPi00409750                                      | 35267.4  | 71%  |
| 1 | IPi00010796                                      | 57100.1  | 100% |
| 2 | IPi00299000,IPi00794875                          | 43768.7  | 100% |
| 1 | IPi00008524                                      | 70653.3  | 100% |
| 1 | IPi00555747                                      | 69561.5  | 71%  |
| 1 | IPi00218728                                      | 46619.4  | 71%  |
| 1 | IPi00026546                                      | 25551.5  | 100% |
| 1 | IPi00217223                                      | 49662.3  | 100% |
| 2 | IPi00419979,IPi00787208                          | 58059.2  | 71%  |
| 5 | IPi00177543,IPi00219041,IPi00219042,IPi00219043, | 108498.8 | 71%  |
| 1 | IPi00298547                                      | 19873.1  | 100% |
| 1 | IPi00449049                                      | 113069.8 | 100% |
| 2 | IPi00018873,IPi00472879                          | 55504.5  | 99%  |
| 1 | IPi00016610                                      | 37480.2  | 100% |
| 4 | IPi00012066,IPi00216689,IPi00470509,IPi00796337  | 38204.5  | 100% |
| 1 | IPi00215946                                      | 116446.3 | 100% |
| 1 | IPi00000495                                      | 23737.2  | 100% |
| 2 | IPi00411680,IPi00828189                          | 24632.9  | 100% |
| 1 | IPi00021700                                      | 28751.3  | 100% |
| 1 | IPi00299738                                      | 47954.5  | 100% |
| 1 | IPi00002543                                      | 45699.3  | 100% |
| 1 | IPi00002280                                      | 27355.2  | 100% |
| 1 | IPi00023640                                      | 14267.3  | 98%  |
| 1 | IPi00246058                                      | 96802.5  | 98%  |
| 1 | IPi00025252                                      | 56766.6  | 0    |
| 1 | IPi00009904                                      | 72916    | 99%  |
| 2 | IPi00299571,IPi00644989                          | 53883.9  | 100% |
| 1 | IPi00007935                                      | 63953    | 0    |

|   |                                                  |          |      |
|---|--------------------------------------------------|----------|------|
| 2 | IPI00014850,IPI00643342                          | 15023.2  | 0    |
| 1 | IPI00219446                                      | 21038.9  | 100% |
| 1 | IPI00257882                                      | 54529.7  | 71%  |
| 1 | IPI00004534                                      | 144645.6 | 0    |
| 1 | IPI00006052                                      | 16629.8  | 100% |
| 1 | IPI00015891                                      | 15296.6  | 100% |
| 1 | IPI00643196                                      | 85299.1  | 71%  |
| 1 | IPI00216691                                      | 15036.3  | 100% |
| 1 | IPI00169383                                      | 44597.3  | 100% |
| 1 | IPI00029997                                      | 27529.5  | 0    |
| 1 | IPI00550364                                      | 68267.7  | 71%  |
| 1 | IPI00220739                                      | 21654.2  | 100% |
| 1 | IPI00299977                                      | 13814.6  | 100% |
| 1 | IPI00479186                                      | 57919.5  | 100% |
| 1 | IPI00296180                                      | 48507.5  | 100% |
| 2 | IPI00010676,IPI00215706                          | 36959.2  | 100% |
| 1 | IPI00398002                                      | 518449.3 | 100% |
| 1 | IPI00019580                                      | 90549.4  | 100% |
| 1 | IPI00027192                                      | 83534.5  | 100% |
| 1 | IPI00030255                                      | 84768.8  | 100% |
| 1 | IPI00216694                                      | 70795.9  | 100% |
| 1 | IPI00643034                                      | 54723.1  | 100% |
| 2 | IPI00398435,IPI00736693                          | 211835.7 | 0    |
| 1 | IPI00018272                                      | 29970.2  | 100% |
| 5 | IPI00007960,IPI00218585,IPI00410241,IPI00641231, | 93300    | 100% |
| 1 | IPI00015018                                      | 32642.6  | 100% |
| 1 | IPI00419585                                      | 17994.9  | 100% |
| 1 | IPI00646304                                      | 23725.2  | 100% |
| 1 | IPI00220188                                      | 33068.2  | 71%  |
| 1 | IPI00006167                                      | 59253.9  | 100% |
| 3 | IPI00550451,IPI00794133,IPI00797955              | 37495.9  | 71%  |
| 1 | IPI00398922                                      | 20947.2  | 100% |
| 3 | IPI00008380,IPI00429689,IPI00789014              | 35576.5  | 100% |
| 2 | IPI00419307,IPI00554737                          | 65291.7  | 100% |
| 2 | IPI00019812,IPI00790133                          | 56862.3  | 0    |
| 1 | IPI00002412                                      | 34176    | 0    |
| 6 | IPI00021421,IPI00453232,IPI00552460,IPI00647927, | 34207.9  | 15%  |
| 1 | IPI00399307                                      | 58083    | 71%  |
| 1 | IPI00000874                                      | 22092.9  | 100% |
| 1 | IPI00024919                                      | 27674.7  | 100% |
| 1 | IPI00011937                                      | 30523.1  | 71%  |
| 2 | IPI00024915,IPI00759663                          | 22008.3  | 100% |
| 1 | IPI00220301                                      | 25018.1  | 100% |
| 2 | IPI00026154,IPI00792916                          | 59407.7  | 100% |
| 2 | IPI00064328,IPI00441473                          | 71303.7  | 25%  |
| 1 | IPI00009276                                      | 30697.3  | 100% |
| 1 | IPI00004968                                      | 55163.3  | 100% |
| 1 | IPI00026941                                      | 42984.4  | 100% |
| 2 | IPI00012503,IPI00219825                          | 58094    | 100% |
| 2 | IPI00016832,IPI00472442                          | 29538    | 15%  |
| 1 | IPI00219622                                      | 25880.9  | 100% |
| 4 | IPI00299155,IPI00789638,IPI00790038,IPI00795606  | 29466.8  | 0    |
| 1 | IPI00291922                                      | 26393.3  | 42%  |
| 1 | IPI00029623                                      | 27381.5  | 71%  |
| 1 | IPI00024175                                      | 27869.1  | 100% |
| 1 | IPI00025019                                      | 26472.5  | 71%  |
| 1 | IPI00028006                                      | 22819.5  | 100% |
| 1 | IPI00028004                                      | 22931.6  | 100% |
| 1 | IPI00555956                                      | 29187    | 99%  |
| 2 | IPI00375704,IPI00479306                          | 28792.4  | 71%  |
| 3 | IPI00023919,IPI00555749,IPI00745502              | 45609.2  | 71%  |
| 1 | IPI00021926                                      | 44156.9  | 0    |
| 1 | IPI00299608                                      | 105821.2 | 0    |



|   |                                                 |          |      |
|---|-------------------------------------------------|----------|------|
| 1 | IPI00105598                                     | 47519.4  | 0    |
| 1 | IPI00384420                                     | 64570.8  | 0    |
| 1 | IPI00011603                                     | 60961.6  | 100% |
| 1 | IPI00019927                                     | 37007.6  | 71%  |
| 2 | IPI00030154,IPI00479722                         | 28705.9  | 100% |
| 2 | IPI00384051,IPI00746205                         | 27344.3  | 100% |
| 3 | IPI00179964,IPI00183626,IPI00334175             | 57204.5  | 100% |
| 1 | IPI00789101                                     | 19431.3  | 100% |
| 1 | IPI00555762                                     | 84345.8  | 100% |
| 1 | IPI00008998                                     | 44406.7  | 0    |
| 1 | IPI00289082                                     | 88103.6  | 71%  |
| 1 | IPI00465186                                     | 211667.8 | 100% |
| 1 | IPI00743517                                     | 212466.3 | 100% |
| 2 | IPI00176903,IPI00513773                         | 43458.5  | 71%  |
| 1 | IPI00029568                                     | 42001.9  | 100% |
| 1 | IPI00219425                                     | 40105.9  | 0    |
| 1 | IPI00215980                                     | 51340.8  | 100% |
| 1 | IPI00787655                                     | 174439.9 | 100% |
| 1 | IPI00470525                                     | 97134.4  | 100% |
| 1 | IPI00003919                                     | 40859.9  | 100% |
| 1 | IPI00003590                                     | 82560.7  | 100% |
| 3 | IPI00376394,IPI00479085,IPI00783371             | 77739.3  | 0    |
| 2 | IPI00020436,IPI00790785                         | 24471    | 71%  |
| 1 | IPI00016342                                     | 23472    | 100% |
| 1 | IPI00008223                                     | 43153.1  | 0    |
| 1 | IPI00793015                                     | 23551.3  | 0    |
| 1 | IPI00796462                                     | 26798.4  | 0    |
| 1 | IPI00414127                                     | 23292.8  | 100% |
| 1 | IPI00221325                                     | 358180.2 | 0    |
| 2 | IPI00783829,IPI00793443                         | 123614.2 | 100% |
| 1 | IPI00015148                                     | 20806.9  | 71%  |
| 2 | IPI00328319,IPI00645329                         | 47637.8  | 99%  |
| 1 | IPI00646512                                     | 52295.8  | 71%  |
| 3 | IPI00102752,IPI00220716,IPI00220717             | 107175   | 0    |
| 2 | IPI00001757,IPI00216659                         | 19871.4  | 0    |
| 1 | IPI00304692                                     | 42315.7  | 0    |
| 3 | IPI00001661,IPI00747309,IPI00787306             | 48126.3  | 100% |
| 1 | IPI00015842                                     | 38873.2  | 71%  |
| 1 | IPI00178431                                     | 73440    | 0    |
| 2 | IPI00027434,IPI00647268                         | 21988.7  | 100% |
| 1 | IPI00008554                                     | 16532.2  | 100% |
| 1 | IPI00414896                                     | 29463.2  | 71%  |
| 1 | IPI00783491                                     | 49855.2  | 0    |
| 1 | IPI00647400                                     | 68152.3  | 0    |
| 1 | IPI00829739                                     | 169635.2 | 0    |
| 1 | IPI00307155                                     | 160900.8 | 0    |
| 1 | IPI00017373                                     | 13551    | 71%  |
| 2 | IPI00412579,IPI00827508                         | 24814    | 100% |
| 1 | IPI00024933                                     | 17801.1  | 100% |
| 1 | IPI00215719                                     | 21617.2  | 100% |
| 2 | IPI00215790,IPI00792410                         | 8200.5   | 0    |
| 1 | IPI00003918                                     | 47681.1  | 71%  |
| 2 | IPI00000494,IPI00797983                         | 34345.5  | 71%  |
| 3 | IPI00012772,IPI00795138,IPI00797230             | 28006.8  | 0    |
| 1 | IPI00794884                                     | 24280.8  | 99%  |
| 1 | IPI00008527                                     | 11496.1  | 100% |
| 1 | IPI00008529                                     | 11647.5  | 100% |
| 1 | IPI00008438                                     | 18880.3  | 100% |
| 1 | IPI00026271                                     | 16254.9  | 0    |
| 4 | IPI00013485,IPI00479366,IPI00744451,IPI00827598 | 31307.2  | 99%  |
| 2 | IPI00012493,IPI00794659                         | 13355    | 0    |
| 3 | IPI00179330,IPI00456429,IPI00793330             | 17947.6  | 71%  |
| 1 | IPI00011253                                     | 26670.6  | 71%  |

|   |                                                  |          |      |
|---|--------------------------------------------------|----------|------|
| 2 | IPI00419880,IPI00472119                          | 29927.3  | 0    |
| 1 | IPI00217030                                      | 29581.3  | 71%  |
| 1 | IPI00008433                                      | 22859    | 100% |
| 1 | IPI00013415                                      | 22109.5  | 100% |
| 1 | IPI00216587                                      | 24188.4  | 100% |
| 2 | IPI00413108,IPI00553164                          | 33295.5  | 100% |
| 2 | IPI00027765,IPI00829898                          | 28146.2  | 71%  |
| 1 | IPI00021766                                      | 130086.8 | 71%  |
| 1 | IPI00021187                                      | 50211.4  | 71%  |
| 1 | IPI00009104                                      | 51140.1  | 100% |
| 1 | IPI00183695                                      | 11185.5  | 71%  |
| 1 | IPI00013895                                      | 11723.1  | 0    |
| 1 | IPI00005648                                      | 107456.4 | 100% |
| 1 | IPI00514587                                      | 61296.8  | 100% |
| 1 | IPI00009362                                      | 70852.7  | 100% |
| 2 | IPI00006252,IPI00793201                          | 34335    | 21%  |
| 1 | IPI00011564                                      | 21624.1  | 100% |
| 3 | IPI00299086,IPI00479018,IPI00794699              | 32427.3  | 71%  |
| 1 | IPI00106642                                      | 66998.8  | 100% |
| 1 | IPI00106646                                      | 41788.9  | 100% |
| 1 | IPI00170635                                      | 27020.6  | 71%  |
| 1 | IPI00031510                                      | 88872.8  | 100% |
| 1 | IPI00019209                                      | 85189.8  | 100% |
| 1 | IPI00419724                                      | 92748.7  | 100% |
| 1 | IPI00073763                                      | 92605.3  | 100% |
| 1 | IPI00029056                                      | 42892.5  | 71%  |
| 2 | IPI00014177,IPI00792151                          | 41470.1  | 100% |
| 2 | IPI00784614,IPI00784936                          | 65384.3  | 0    |
| 2 | IPI00412714,IPI00470498                          | 42408.9  | 0    |
| 2 | IPI00291866,IPI00556459                          | 55137.5  | 100% |
| 1 | IPI00032140                                      | 46424    | 100% |
| 1 | IPI00072377                                      | 33471.4  | 100% |
| 3 | IPI00018276,IPI00419722,IPI00645828              | 92438.4  | 0    |
| 1 | IPI00017451                                      | 88868.1  | 100% |
| 1 | IPI00017341                                      | 51457.1  | 0    |
| 1 | IPI00029764                                      | 58833.3  | 71%  |
| 1 | IPI00026089                                      | 145802.3 | 100% |
| 1 | IPI00221106                                      | 100211.4 | 100% |
| 1 | IPI00300371                                      | 135561.4 | 0    |
| 1 | IPI00017339                                      | 44368.5  | 100% |
| 1 | IPI00013890                                      | 27756.8  | 100% |
| 1 | IPI00010740                                      | 76131.5  | 100% |
| 1 | IPI00749245                                      | 35368.3  | 71%  |
| 3 | IPI00005978,IPI00385786,IPI00796848              | 25459.1  | 71%  |
| 1 | IPI00003377                                      | 27349.5  | 100% |
| 1 | IPI00013949                                      | 34045.9  | 100% |
| 1 | IPI00010402                                      | 23820.2  | 100% |
| 1 | IPI00021326                                      | 62875.9  | 100% |
| 2 | IPI00069750,IPI00797595                          | 59857.6  | 0    |
| 1 | IPI00647217                                      | 117790.3 | 0    |
| 1 | IPI00301364                                      | 18640.3  | 100% |
| 6 | IPI00027493,IPI00554481,IPI00554611,IPI00554702, | 57929.4  | 100% |
| 2 | IPI00234252,IPI00797830                          | 122735.3 | 0    |
| 2 | IPI00150057,IPI00216047                          | 124823.6 | 0    |
| 1 | IPI00140420                                      | 101980.5 | 71%  |
| 2 | IPI00219483,IPI00290204                          | 51540.4  | 71%  |
| 7 | IPI00027285,IPI00220360,IPI00329512,IPI00384173, | 24592.6  | 100% |
| 1 | IPI00302850                                      | 13263.9  | 100% |
| 1 | IPI00017963                                      | 13509.1  | 100% |
| 1 | IPI00017964                                      | 13898.6  | 71%  |
| 1 | IPI00016572                                      | 8478.3   | 71%  |
| 1 | IPI00013830                                      | 61477.9  | 71%  |
| 2 | IPI00218733,IPI00783680                          | 16103.7  | 100% |

|   |                                                  |          |      |
|---|--------------------------------------------------|----------|------|
| 1 | IPI00005292                                      | 49106.7  | 100% |
| 1 | IPI00006128                                      | 46761.4  | 100% |
| 1 | IPI00744706                                      | 283209.2 | 100% |
| 1 | IPI00005614                                      | 274595.4 | 0    |
| 1 | IPI00782992                                      | 299603.6 | 100% |
| 1 | IPI00009032                                      | 46821    | 100% |
| 1 | IPI00005154                                      | 81059.6  | 100% |
| 3 | IPI00000001,IPI00218609,IPI00643664              | 63165.1  | 71%  |
| 1 | IPI00005564                                      | 27603.3  | 100% |
| 1 | IPI00299299                                      | 51910.5  | 100% |
| 1 | IPI00013894                                      | 62624.1  | 100% |
| 3 | IPI00479997,IPI00642012,IPI00643115              | 17285    | 0    |
| 1 | IPI00294536                                      | 38421.4  | 71%  |
| 1 | IPI00221222                                      | 14377.9  | 100% |
| 4 | IPI00171412,IPI00334514,IPI00783919,IPI00784010  | 33839.4  | 0    |
| 1 | IPI00026970                                      | 119899.4 | 71%  |
| 1 | IPI00301288                                      | 390478   | 0    |
| 1 | IPI00307200                                      | 68981.3  | 71%  |
| 4 | IPI00018140,IPI00402182,IPI00402183,IPI00402184  | 69585.5  | 100% |
| 2 | IPI00550363,IPI00647915                          | 22373.9  | 100% |
| 1 | IPI00025815                                      | 44721.7  | 71%  |
| 1 | IPI00329633                                      | 83419.8  | 100% |
| 1 | IPI00217236                                      | 12837.2  | 100% |
| 1 | IPI00293126                                      | 27307.5  | 12%  |
| 2 | IPI00026670,IPI00410162                          | 13115.2  | 71%  |
| 2 | IPI00294619,IPI00788849                          | 43416.2  | 0    |
| 1 | IPI00021834                                      | 34998.1  | 100% |
| 1 | IPI00009198                                      | 26916.9  | 100% |
| 1 | IPI00022462                                      | 84855.6  | 100% |
| 1 | IPI00000075                                      | 44324.2  | 100% |
| 1 | IPI00235354                                      | 47731.4  | 100% |
| 1 | IPI00304865                                      | 93482.2  | 100% |
| 1 | IPI00294578                                      | 77311.1  | 0    |
| 1 | IPI00296099                                      | 129363.7 | 100% |
| 1 | IPI00329535                                      | 104181.8 | 0    |
| 1 | IPI00328840                                      | 27540.5  | 100% |
| 1 | IPI00104050                                      | 108650.9 | 0    |
| 1 | IPI00794391                                      | 112429.2 | 0    |
| 1 | IPI00028376                                      | 10980.2  | 0    |
| 2 | IPI00032292,IPI00642739                          | 23153.1  | 100% |
| 1 | IPI00788747                                      | 21647.9  | 100% |
| 1 | IPI00788802                                      | 67889.5  | 100% |
| 1 | IPI00784273                                      | 269747.1 | 100% |
| 1 | IPI00443909                                      | 20634.5  | 71%  |
| 1 | IPI00030131                                      | 50653.4  | 0    |
| 1 | IPI00216230                                      | 75475.8  | 100% |
| 1 | IPI00031008                                      | 240845.2 | 100% |
| 1 | IPI00298362                                      | 46022.2  | 100% |
| 1 | IPI00064377                                      | 46073.3  | 0    |
| 2 | IPI00018880,IPI00796532                          | 50477.4  | 100% |
| 5 | IPI00178667,IPI00218753,IPI00218754,IPI00414101, | 183280.2 | 33%  |
| 2 | IPI00023137,IPI00477672                          | 37962.5  | 100% |
| 3 | IPI00029778,IPI00657708,IPI00742743              | 213554.2 | 0    |
| 4 | IPI00306825,IPI00399265,IPI00399267,IPI00743469  | 22219.9  | 100% |
| 1 | IPI00465028                                      | 30772.8  | 100% |
| 6 | IPI00014581,IPI00018853,IPI00216135,IPI00296039, | 32692    | 100% |
| 1 | IPI00220709                                      | 32972.6  | 0    |
| 3 | IPI00178083,IPI00218319,IPI00479185              | 29061.4  | 100% |
| 1 | IPI00010779                                      | 28504.4  | 0    |
| 2 | IPI00298237,IPI00554538                          | 61229.6  | 100% |
| 2 | IPI00022970,IPI00742682                          | 265846.5 | 71%  |
| 2 | IPI00009943,IPI00550900                          | 21508.5  | 100% |
| 1 | IPI00102661                                      | 89376.4  | 100% |

|   |                                                  |          |      |
|---|--------------------------------------------------|----------|------|
| 2 | IPI00438229,IPI00438230                          | 88531    | 100% |
| 1 | IPI00641368                                      | 37790.4  | 0    |
| 1 | IPI00018768                                      | 26165.4  | 71%  |
| 1 | IPI00180675                                      | 50117.7  | 0    |
| 1 | IPI00792677                                      | 46295.5  | 100% |
| 1 | IPI00011654                                      | 49652.6  | 100% |
| 1 | IPI00007752                                      | 49812.7  | 0    |
| 1 | IPI00013683                                      | 50414.7  | 100% |
| 1 | IPI00023598                                      | 49567.5  | 100% |
| 1 | IPI00641706                                      | 45746.4  | 0    |
| 2 | IPI00183508,IPI00385754                          | 43901.5  | 71%  |
| 2 | IPI00410487,IPI00830092                          | 24997.8  | 71%  |
| 1 | IPI00216298                                      | 11719.3  | 100% |
| 1 | IPI00026328                                      | 19188.4  | 71%  |
| 1 | IPI00008552                                      | 37414.8  | 71%  |
| 1 | IPI00646689                                      | 13922.4  | 100% |
| 3 | IPI00031556,IPI00746657,IPI00830039              | 53483.1  | 71%  |
| 1 | IPI00646016                                      | 37942.8  | 0    |
| 1 | IPI00645078                                      | 117832.3 | 100% |
| 1 | IPI00021347                                      | 17844.3  | 100% |
| 1 | IPI00003949                                      | 17120.6  | 71%  |
| 5 | IPI00019599,IPI00030962,IPI00397947,IPI00447356, | 25778.9  | 71%  |
| 1 | IPI00071180                                      | 59202.6  | 0    |
| 1 | IPI00018352                                      | 24806.3  | 100% |
| 1 | IPI00654779                                      | 33303.6  | 0    |
| 2 | IPI00034049,IPI00399170                          | 124328.9 | 100% |
| 1 | IPI00219913                                      | 56052.3  | 100% |
| 1 | IPI00375145                                      | 93291.5  | 100% |
| 1 | IPI00107113                                      | 87961.4  | 0    |
| 1 | IPI00170692                                      | 27875.9  | 0    |
| 1 | IPI00156689                                      | 41901.8  | 71%  |
| 1 | IPI00334159                                      | 26518    | 100% |
| 2 | IPI00291175,IPI00307162                          | 116706.3 | 100% |
| 1 | IPI00022774                                      | 89306.8  | 100% |
| 1 | IPI00069058                                      | 67239.9  | 100% |
| 1 | IPI00746388                                      | 69671.9  | 100% |
| 1 | IPI00418471                                      | 53634.7  | 100% |
| 2 | IPI00295400,IPI00412737                          | 53149.6  | 100% |
| 1 | IPI00746165                                      | 66175.2  | 100% |
| 1 | IPI00012202                                      | 36705.2  | 0    |
| 2 | IPI00298961,IPI00784388                          | 123370.9 | 100% |
| 1 | IPI00220834                                      | 82689.1  | 100% |
| 2 | IPI00465430,IPI00644712                          | 69855.4  | 100% |
| 1 | IPI00012197                                      | 18663.2  | 100% |
| 1 | IPI00432723                                      | 96750    | 0    |
| 1 | IPI00216919                                      | 54443.5  | 0    |
| 1 | IPI00007074                                      | 59127.1  | 100% |
| 1 | IPI00385699                                      | 34629    | 100% |
| 1 | IPI00008569                                      | 22399.8  | 0    |
| 2 | IPI00216318,IPI00759832                          | 28065.1  | 100% |
| 1 | IPI00000816                                      | 29157    | 100% |
| 1 | IPI00220642                                      | 28285.1  | 0    |
| 1 | IPI00216319                                      | 28201.6  | 0    |
| 1 | IPI00018146                                      | 27747.4  | 0    |
| 1 | IPI00021263                                      | 27727.9  | 100% |

ching

| H23-Rep2 (CRL5800-S2-Fc) | H23-Rep3 (CRL5800-S3-Fc) | # Unique peptide H23-Rep1 (CRL5800-S1-Fc) |
|--------------------------|--------------------------|-------------------------------------------|
| 100%                     | 0                        | 4                                         |
| 100%                     | 100%                     | 0                                         |
| 100%                     | 100%                     | 0                                         |
| 0                        | 100%                     | 0                                         |
| 100%                     | 100%                     | 2                                         |
| 100%                     | 100%                     | 3                                         |
| 100%                     | 100%                     | 5                                         |
| 100%                     | 0                        | 0                                         |
| 0                        | 0                        | 11                                        |
| 0                        | 0                        | 2                                         |
| 100%                     | 100%                     | 3                                         |
| 100%                     | 64%                      | 1                                         |
| 100%                     | 64%                      | 0                                         |
| 100%                     | 100%                     | 2                                         |
| 0                        | 0                        | 4                                         |
| 100%                     | 100%                     | 0                                         |
| 100%                     | 100%                     | 0                                         |
| 100%                     | 100%                     | 13                                        |
| 100%                     | 100%                     | 22                                        |
| 100%                     | 100%                     | 7                                         |
| 100%                     | 100%                     | 0                                         |
| 100%                     | 100%                     | 5                                         |
| 100%                     | 64%                      | 1                                         |
| 100%                     | 100%                     | 1                                         |
| 100%                     | 100%                     | 2                                         |
| 100%                     | 100%                     | 3                                         |
| 100%                     | 0                        | 0                                         |
| 100%                     | 64%                      | 0                                         |
| 100%                     | 100%                     | 14                                        |
| 100%                     | 100%                     | 0                                         |
| 100%                     | 100%                     | 17                                        |
| 100%                     | 64%                      | 3                                         |
| 100%                     | 100%                     | 2                                         |
| 100%                     | 100%                     | 1                                         |
| 100%                     | 100%                     | 5                                         |
| 100%                     | 0                        | 14                                        |
| 0                        | 100%                     | 0                                         |
| 100%                     | 0                        | 2                                         |
| 100%                     | 100%                     | 11                                        |
| 100%                     | 0                        | 1                                         |
| 98%                      | 13%                      | 0                                         |
| 100%                     | 100%                     | 4                                         |
| 100%                     | 64%                      | 1                                         |
| 100%                     | 64%                      | 1                                         |
| 100%                     | 100%                     | 10                                        |
| 0                        | 100%                     | 0                                         |
| 100%                     | 100%                     | 8                                         |
| 100%                     | 100%                     | 8                                         |
| 100%                     | 23%                      | 1                                         |
| 100%                     | 100%                     | 4                                         |
| 99%                      | 0                        | 0                                         |
| 100%                     | 100%                     | 6                                         |
| 100%                     | 100%                     | 6                                         |
| 100%                     | 100%                     | 4                                         |
| 100%                     | 100%                     | 12                                        |
| 0                        | 100%                     | 0                                         |
| 100%                     | 0                        | 2                                         |
| 100%                     | 100%                     | 1                                         |
| 0                        | 100%                     | 1                                         |
| 0                        | 100%                     | 0                                         |

|      |      |   |
|------|------|---|
| 100% | 64%  | 0 |
| 100% | 0    | 2 |
| 100% | 100% | 1 |
| 100% | 100% | 4 |
| 100% | 55%  | 0 |
| 100% | 100% | 3 |
| 98%  | 100% | 3 |
| 100% | 0    | 1 |
| 100% | 100% | 5 |
| 98%  | 64%  | 1 |
| 100% | 100% | 2 |
| 100% | 100% | 1 |
| 100% | 64%  | 1 |
| 100% | 100% | 1 |
| 100% | 64%  | 2 |
| 64%  | 0    | 2 |
| 100% | 100% | 6 |
| 100% | 100% | 1 |
| 100% | 100% | 2 |
| 100% | 0    | 2 |
| 100% | 100% | 2 |
| 64%  | 100% | 0 |
| 100% | 64%  | 1 |
| 64%  | 64%  | 2 |
| 100% | 64%  | 2 |
| 64%  | 64%  | 3 |
| 100% | 64%  | 0 |
| 100% | 100% | 3 |
| 64%  | 100% | 0 |
| 100% | 64%  | 0 |
| 100% | 64%  | 1 |
| 99%  | 97%  | 1 |
| 100% | 64%  | 0 |
| 64%  | 100% | 0 |
| 100% | 0    | 0 |
| 100% | 100% | 2 |
| 100% | 64%  | 1 |
| 100% | 64%  | 3 |
| 100% | 100% | 2 |
| 0    | 100% | 6 |
| 100% | 100% | 0 |
| 100% | 100% | 3 |
| 100% | 100% | 5 |
| 100% | 100% | 1 |
| 100% | 100% | 4 |
| 98%  | 0    | 0 |
| 100% | 100% | 4 |
| 100% | 0    | 0 |
| 100% | 100% | 0 |
| 64%  | 64%  | 2 |
| 64%  | 64%  | 2 |
| 0    | 99%  | 1 |
| 64%  | 100% | 0 |
| 100% | 100% | 3 |
| 64%  | 100% | 2 |
| 100% | 100% | 4 |
| 100% | 100% | 4 |
| 100% | 100% | 4 |
| 100% | 100% | 3 |
| 0    | 100% | 3 |
| 100% | 99%  | 2 |
| 0    | 100% | 6 |
| 100% | 100% | 3 |

|      |      |    |
|------|------|----|
| 100% | 0    | 0  |
| 64%  | 100% | 1  |
| 100% | 100% | 2  |
| 64%  | 64%  | 2  |
| 100% | 100% | 2  |
| 64%  | 100% | 2  |
| 64%  | 100% | 3  |
| 100% | 100% | 4  |
| 100% | 64%  | 1  |
| 98%  | 100% | 0  |
| 100% | 100% | 10 |
| 100% | 100% | 6  |
| 100% | 100% | 3  |
| 100% | 64%  | 0  |
| 0    | 100% | 0  |
| 100% | 64%  | 1  |
| 64%  | 100% | 0  |
| 100% | 100% | 11 |
| 64%  | 100% | 5  |
| 100% | 100% | 1  |
| 98%  | 0    | 0  |
| 100% | 100% | 9  |
| 0    | 0    | 1  |
| 100% | 100% | 8  |
| 100% | 100% | 16 |
| 100% | 100% | 14 |
| 100% | 0    | 0  |
| 100% | 64%  | 3  |
| 100% | 100% | 3  |
| 100% | 0    | 6  |
| 0    | 100% | 0  |
| 0    | 100% | 0  |
| 100% | 100% | 5  |
| 0    | 99%  | 1  |
| 99%  | 0    | 1  |
| 100% | 64%  | 2  |
| 100% | 100% | 1  |
| 64%  | 100% | 2  |
| 100% | 100% | 2  |
| 100% | 100% | 8  |
| 100% | 100% | 1  |
| 100% | 0    | 0  |
| 100% | 100% | 3  |
| 100% | 64%  | 0  |
| 100% | 100% | 2  |
| 0    | 100% | 1  |
| 100% | 0    | 1  |
| 100% | 100% | 2  |
| 100% | 100% | 0  |
| 0    | 0    | 1  |
| 100% | 100% | 6  |
| 100% | 100% | 3  |
| 100% | 100% | 6  |
| 100% | 100% | 1  |
| 100% | 0    | 1  |
| 100% | 0    | 0  |
| 100% | 0    | 0  |
| 100% | 0    | 0  |
| 64%  | 0    | 2  |
| 100% | 100% | 7  |
| 100% | 64%  | 4  |
| 100% | 0    | 1  |
| 100% | 100% | 5  |

|      |      |    |
|------|------|----|
| 100% | 100% | 3  |
| 100% | 100% | 3  |
| 100% | 100% | 2  |
| 100% | 100% | 7  |
| 0    | 64%  | 2  |
| 100% | 100% | 3  |
| 100% | 100% | 1  |
| 100% | 100% | 2  |
| 0    | 100% | 5  |
| 100% | 0    | 1  |
| 100% | 100% | 10 |
| 100% | 64%  | 0  |
| 100% | 100% | 3  |
| 100% | 0    | 0  |
| 0    | 64%  | 2  |
| 100% | 64%  | 3  |
| 100% | 100% | 0  |
| 99%  | 0    | 0  |
| 100% | 64%  | 3  |
| 100% | 100% | 2  |
| 64%  | 100% | 1  |
| 100% | 64%  | 0  |
| 98%  | 100% | 1  |
| 64%  | 0    | 2  |
| 100% | 64%  | 0  |
| 100% | 100% | 5  |
| 100% | 64%  | 0  |
| 100% | 100% | 3  |
| 100% | 100% | 1  |
| 100% | 100% | 3  |
| 0    | 100% | 0  |
| 100% | 0    | 0  |
| 100% | 100% | 1  |
| 100% | 100% | 0  |
| 100% | 100% | 3  |
| 64%  | 100% | 1  |
| 64%  | 64%  | 3  |
| 100% | 0    | 2  |
| 100% | 100% | 1  |
| 100% | 64%  | 1  |
| 100% | 64%  | 1  |
| 100% | 0    | 1  |
| 100% | 100% | 0  |
| 100% | 100% | 3  |
| 100% | 100% | 5  |
| 100% | 100% | 4  |
| 100% | 100% | 9  |
| 100% | 100% | 17 |
| 100% | 100% | 9  |
| 100% | 100% | 2  |
| 100% | 58%  | 1  |
| 14%  | 0    | 2  |
| 100% | 64%  | 0  |
| 100% | 64%  | 1  |
| 100% | 64%  | 2  |
| 100% | 64%  | 2  |
| 64%  | 98%  | 0  |
| 100% | 64%  | 1  |
| 100% | 100% | 3  |
| 100% | 64%  | 1  |
| 100% | 0    | 3  |
| 100% | 100% | 3  |
| 100% | 64%  | 2  |



|      |      |    |
|------|------|----|
| 100% | 0    | 2  |
| 100% | 100% | 7  |
| 100% | 100% | 1  |
| 100% | 100% | 1  |
| 100% | 64%  | 4  |
| 100% | 100% | 17 |
| 100% | 98%  | 0  |
| 100% | 0    | 1  |
| 64%  | 64%  | 2  |
| 100% | 64%  | 1  |
| 100% | 100% | 2  |
| 9%   | 0    | 2  |
| 64%  | 100% | 2  |
| 64%  | 100% | 2  |
| 100% | 64%  | 1  |
| 100% | 64%  | 1  |
| 0    | 100% | 0  |
| 100% | 0    | 0  |
| 100% | 100% | 3  |
| 100% | 64%  | 2  |
| 100% | 100% | 5  |
| 100% | 0    | 1  |
| 100% | 64%  | 2  |
| 100% | 100% | 7  |
| 100% | 64%  | 3  |
| 100% | 0    | 0  |
| 100% | 100% | 0  |
| 64%  | 0    | 2  |
| 100% | 100% | 2  |
| 100% | 64%  | 0  |
| 100% | 64%  | 1  |
| 100% | 64%  | 1  |
| 100% | 100% | 4  |
| 100% | 100% | 4  |
| 100% | 100% | 3  |
| 100% | 64%  | 1  |
| 100% | 100% | 36 |
| 100% | 100% | 5  |
| 100% | 0    | 1  |
| 100% | 100% | 0  |
| 98%  | 100% | 3  |
| 100% | 100% | 4  |
| 100% | 0    | 0  |
| 100% | 100% | 2  |
| 100% | 100% | 3  |
| 0    | 0    | 2  |
| 100% | 100% | 1  |
| 100% | 100% | 1  |
| 100% | 100% | 3  |
| 100% | 100% | 0  |
| 99%  | 0    | 2  |
| 100% | 0    | 0  |
| 100% | 100% | 11 |
| 100% | 100% | 12 |
| 100% | 0    | 3  |
| 100% | 64%  | 0  |
| 100% | 0    | 0  |
| 100% | 100% | 0  |
| 64%  | 100% | 3  |
| 98%  | 0    | 0  |
| 100% | 100% | 8  |
| 100% | 100% | 5  |
| 100% | 100% | 4  |

|      |      |    |
|------|------|----|
| 98%  | 0    | 0  |
| 100% | 100% | 3  |
| 100% | 100% | 0  |
| 100% | 0    | 1  |
| 100% | 100% | 2  |
| 100% | 64%  | 1  |
| 64%  | 100% | 1  |
| 100% | 100% | 0  |
| 100% | 0    | 0  |
| 0    | 0    | 2  |
| 100% | 100% | 4  |
| 100% | 64%  | 1  |
| 0    | 0    | 2  |
| 99%  | 100% | 2  |
| 100% | 64%  | 1  |
| 100% | 100% | 7  |
| 100% | 100% | 5  |
| 100% | 0    | 1  |
| 100% | 100% | 5  |
| 100% | 100% | 1  |
| 0    | 100% | 0  |
| 100% | 0    | 1  |
| 100% | 100% | 3  |
| 100% | 10%  | 2  |
| 64%  | 100% | 1  |
| 0    | 100% | 1  |
| 100% | 100% | 10 |
| 100% | 100% | 2  |
| 98%  | 99%  | 0  |
| 64%  | 99%  | 1  |
| 64%  | 64%  | 2  |
| 100% | 100% | 9  |
| 100% | 64%  | 1  |
| 100% | 0    | 8  |
| 100% | 100% | 4  |
| 100% | 100% | 3  |
| 100% | 64%  | 1  |
| 100% | 0    | 0  |
| 0    | 100% | 0  |
| 0    | 100% | 2  |
| 100% | 64%  | 2  |
| 100% | 64%  | 1  |
| 100% | 99%  | 0  |
| 100% | 100% | 7  |
| 64%  | 100% | 1  |
| 64%  | 99%  | 0  |
| 100% | 100% | 5  |
| 64%  | 100% | 1  |
| 100% | 0    | 0  |
| 100% | 0    | 1  |
| 0    | 100% | 3  |
| 64%  | 11%  | 2  |
| 100% | 100% | 9  |
| 99%  | 100% | 2  |
| 100% | 64%  | 2  |
| 100% | 0    | 6  |
| 100% | 100% | 10 |
| 0    | 0    | 4  |
| 100% | 100% | 3  |
| 100% | 100% | 5  |
| 100% | 0    | 0  |
| 100% | 100% | 6  |
| 100% | 0    | 3  |

|      |      |    |
|------|------|----|
| 100% | 100% | 5  |
| 100% | 64%  | 2  |
| 64%  | 100% | 1  |
| 100% | 0    | 1  |
| 0    | 100% | 3  |
| 100% | 0    | 0  |
| 100% | 100% | 1  |
| 100% | 100% | 17 |
| 100% | 100% | 17 |
| 100% | 100% | 5  |
| 100% | 100% | 15 |
| 100% | 100% | 6  |
| 100% | 100% | 14 |
| 100% | 100% | 19 |
| 100% | 100% | 2  |
| 100% | 100% | 6  |
| 100% | 100% | 3  |
| 100% | 100% | 3  |
| 100% | 100% | 9  |
| 100% | 100% | 7  |
| 100% | 0    | 0  |
| 100% | 100% | 3  |
| 100% | 64%  | 1  |
| 100% | 100% | 6  |
| 0    | 99%  | 0  |
| 100% | 100% | 11 |
| 100% | 100% | 3  |
| 100% | 100% | 6  |
| 100% | 100% | 4  |
| 100% | 64%  | 1  |
| 100% | 99%  | 3  |
| 100% | 100% | 4  |
| 100% | 100% | 2  |
| 100% | 100% | 1  |
| 100% | 100% | 5  |
| 100% | 100% | 2  |
| 100% | 64%  | 0  |
| 64%  | 64%  | 2  |
| 100% | 100% | 0  |
| 100% | 64%  | 1  |
| 100% | 0    | 2  |
| 0    | 100% | 0  |
| 100% | 100% | 3  |
| 100% | 100% | 1  |
| 100% | 64%  | 1  |
| 99%  | 99%  | 0  |
| 100% | 100% | 3  |
| 100% | 64%  | 4  |
| 100% | 100% | 3  |
| 100% | 100% | 5  |
| 100% | 100% | 9  |
| 100% | 100% | 6  |
| 100% | 100% | 8  |
| 100% | 100% | 4  |
| 100% | 64%  | 2  |
| 100% | 0    | 0  |
| 100% | 100% | 15 |
| 100% | 100% | 0  |
| 100% | 100% | 17 |
| 100% | 100% | 13 |
| 100% | 100% | 8  |
| 100% | 100% | 3  |
| 100% | 100% | 5  |

|      |      |    |
|------|------|----|
| 100% | 100% | 2  |
| 100% | 64%  | 2  |
| 100% | 100% | 2  |
| 100% | 64%  | 1  |
| 100% | 64%  | 0  |
| 100% | 100% | 4  |
| 100% | 100% | 0  |
| 64%  | 0    | 13 |
| 100% | 100% | 1  |
| 100% | 100% | 3  |
| 100% | 18%  | 1  |
| 100% | 0    | 0  |
| 100% | 100% | 2  |
| 64%  | 100% | 1  |
| 100% | 0    | 0  |
| 100% | 0    | 1  |
| 100% | 36%  | 3  |
| 64%  | 100% | 2  |
| 100% | 100% | 11 |
| 100% | 0    | 0  |
| 100% | 100% | 2  |
| 64%  | 0    | 2  |
| 64%  | 100% | 1  |
| 100% | 100% | 0  |
| 0    | 100% | 3  |
| 100% | 64%  | 1  |
| 100% | 100% | 1  |
| 100% | 99%  | 2  |
| 64%  | 100% | 1  |
| 100% | 0    | 1  |
| 64%  | 64%  | 1  |
| 100% | 100% | 5  |
| 100% | 64%  | 1  |
| 100% | 0    | 3  |
| 100% | 100% | 4  |
| 100% | 100% | 4  |
| 100% | 64%  | 1  |
| 100% | 100% | 3  |
| 100% | 0    | 0  |
| 0    | 100% | 1  |
| 64%  | 100% | 2  |
| 100% | 0    | 1  |
| 100% | 10%  | 1  |
| 100% | 100% | 6  |
| 100% | 100% | 5  |
| 100% | 100% | 0  |
| 100% | 64%  | 1  |
| 100% | 0    | 0  |
| 100% | 0    | 0  |
| 100% | 98%  | 2  |
| 100% | 64%  | 1  |
| 0    | 100% | 1  |
| 100% | 100% | 1  |
| 64%  | 64%  | 2  |
| 100% | 0    | 0  |
| 100% | 100% | 1  |
| 100% | 100% | 1  |
| 100% | 100% | 5  |
| 100% | 100% | 3  |
| 100% | 100% | 14 |
| 100% | 100% | 0  |
| 0    | 64%  | 2  |
| 100% | 100% | 3  |

|      |      |    |
|------|------|----|
| 64%  | 64%  | 2  |
| 100% | 100% | 5  |
| 98%  | 64%  | 1  |
| 98%  | 0    | 0  |
| 100% | 100% | 3  |
| 100% | 100% | 11 |
| 100% | 64%  | 0  |
| 100% | 64%  | 0  |
| 100% | 100% | 2  |
| 100% | 64%  | 0  |
| 100% | 100% | 1  |
| 64%  | 64%  | 2  |
| 100% | 100% | 7  |
| 100% | 64%  | 0  |
| 100% | 100% | 2  |
| 99%  | 100% | 3  |
| 100% | 64%  | 2  |
| 100% | 100% | 2  |
| 100% | 100% | 1  |
| 100% | 100% | 2  |
| 100% | 100% | 4  |
| 100% | 100% | 10 |
| 100% | 99%  | 2  |
| 0    | 100% | 1  |
| 64%  | 0    | 3  |
| 100% | 100% | 16 |
| 100% | 100% | 2  |
| 100% | 100% | 2  |
| 100% | 100% | 1  |
| 100% | 100% | 6  |
| 100% | 100% | 2  |
| 0    | 100% | 3  |
| 100% | 100% | 2  |
| 100% | 100% | 2  |
| 0    | 100% | 0  |
| 100% | 0    | 1  |
| 100% | 100% | 3  |
| 100% | 100% | 3  |
| 100% | 100% | 6  |
| 100% | 64%  | 1  |
| 100% | 0    | 1  |
| 100% | 100% | 2  |
| 100% | 100% | 9  |
| 64%  | 99%  | 1  |
| 100% | 58%  | 1  |
| 100% | 100% | 7  |
| 100% | 100% | 3  |
| 38%  | 64%  | 1  |
| 100% | 100% | 2  |
| 0    | 100% | 3  |
| 100% | 100% | 2  |
| 100% | 0    | 2  |
| 100% | 100% | 3  |
| 100% | 100% | 2  |
| 100% | 100% | 5  |
| 100% | 100% | 6  |
| 100% | 100% | 2  |
| 100% | 100% | 1  |
| 64%  | 0    | 1  |
| 100% | 100% | 0  |
| 100% | 100% | 1  |
| 100% | 100% | 4  |
| 100% | 100% | 0  |

|      |      |    |
|------|------|----|
| 100% | 0    | 0  |
| 100% | 100% | 6  |
| 100% | 64%  | 1  |
| 100% | 0    | 0  |
| 100% | 100% | 2  |
| 100% | 100% | 3  |
| 100% | 100% | 1  |
| 100% | 100% | 4  |
| 100% | 100% | 16 |
| 98%  | 64%  | 0  |
| 100% | 0    | 1  |
| 21%  | 64%  | 3  |
| 64%  | 64%  | 3  |
| 100% | 100% | 14 |
| 100% | 100% | 11 |
| 100% | 100% | 3  |
| 100% | 100% | 10 |
| 100% | 64%  | 3  |
| 100% | 100% | 15 |
| 100% | 100% | 10 |
| 100% | 100% | 9  |
| 100% | 100% | 11 |
| 64%  | 100% | 0  |
| 100% | 0    | 2  |
| 64%  | 64%  | 2  |
| 100% | 100% | 2  |
| 100% | 100% | 9  |
| 100% | 100% | 5  |
| 100% | 0    | 1  |
| 64%  | 100% | 3  |
| 100% | 100% | 1  |
| 100% | 64%  | 2  |
| 100% | 64%  | 2  |
| 100% | 100% | 2  |
| 0    | 100% | 0  |
| 100% | 100% | 0  |
| 64%  | 100% | 0  |
| 100% | 64%  | 1  |
| 100% | 100% | 12 |
| 100% | 100% | 2  |
| 100% | 100% | 1  |
| 99%  | 19%  | 2  |
| 100% | 100% | 7  |
| 100% | 100% | 2  |
| 100% | 22%  | 0  |
| 100% | 100% | 4  |
| 100% | 100% | 3  |
| 100% | 100% | 3  |
| 100% | 100% | 13 |
| 100% | 64%  | 0  |
| 100% | 100% | 2  |
| 0    | 100% | 0  |
| 100% | 100% | 0  |
| 100% | 100% | 1  |
| 100% | 100% | 2  |
| 100% | 100% | 1  |
| 100% | 100% | 3  |
| 100% | 100% | 2  |
| 0    | 100% | 1  |
| 64%  | 100% | 1  |
| 64%  | 99%  | 1  |
| 100% | 0    | 0  |
| 100% | 100% | 0  |

|      |      |    |
|------|------|----|
| 100% | 0    | 0  |
| 100% | 0    | 0  |
| 0    | 64%  | 2  |
| 100% | 64%  | 1  |
| 100% | 100% | 2  |
| 100% | 100% | 4  |
| 100% | 100% | 6  |
| 100% | 100% | 4  |
| 100% | 0    | 2  |
| 100% | 100% | 0  |
| 100% | 0    | 1  |
| 100% | 100% | 7  |
| 100% | 100% | 1  |
| 100% | 0    | 1  |
| 100% | 100% | 5  |
| 100% | 64%  | 0  |
| 100% | 100% | 2  |
| 100% | 100% | 14 |
| 100% | 100% | 5  |
| 64%  | 64%  | 3  |
| 100% | 100% | 14 |
| 100% | 64%  | 0  |
| 64%  | 100% | 1  |
| 64%  | 100% | 3  |
| 100% | 100% | 0  |
| 100% | 0    | 0  |
| 0    | 100% | 0  |
| 0    | 100% | 2  |
| 100% | 100% | 0  |
| 100% | 100% | 6  |
| 100% | 0    | 1  |
| 100% | 99%  | 1  |
| 64%  | 99%  | 1  |
| 100% | 64%  | 0  |
| 64%  | 100% | 0  |
| 0    | 100% | 0  |
| 100% | 100% | 2  |
| 100% | 64%  | 1  |
| 100% | 64%  | 0  |
| 100% | 100% | 4  |
| 100% | 100% | 2  |
| 100% | 0    | 1  |
| 100% | 0    | 0  |
| 100% | 64%  | 0  |
| 100% | 100% | 0  |
| 98%  | 0    | 0  |
| 100% | 64%  | 1  |
| 100% | 100% | 3  |
| 100% | 100% | 4  |
| 64%  | 0    | 2  |
| 64%  | 100% | 0  |
| 100% | 100% | 1  |
| 64%  | 100% | 1  |
| 0    | 100% | 0  |
| 100% | 0    | 1  |
| 100% | 64%  | 2  |
| 100% | 100% | 5  |
| 100% | 100% | 3  |
| 100% | 64%  | 0  |
| 99%  | 98%  | 1  |
| 64%  | 100% | 0  |
| 64%  | 100% | 1  |
| 100% | 100% | 1  |

|      |      |    |
|------|------|----|
| 100% | 0    | 0  |
| 100% | 100% | 1  |
| 64%  | 64%  | 2  |
| 100% | 100% | 3  |
| 100% | 64%  | 2  |
| 100% | 64%  | 2  |
| 100% | 64%  | 1  |
| 100% | 64%  | 1  |
| 64%  | 100% | 1  |
| 64%  | 100% | 2  |
| 100% | 64%  | 1  |
| 100% | 100% | 0  |
| 100% | 100% | 2  |
| 100% | 57%  | 6  |
| 100% | 100% | 12 |
| 98%  | 100% | 0  |
| 100% | 100% | 3  |
| 100% | 100% | 1  |
| 0    | 0    | 2  |
| 100% | 100% | 8  |
| 100% | 0    | 1  |
| 100% | 100% | 3  |
| 100% | 100% | 6  |
| 100% | 100% | 2  |
| 100% | 100% | 3  |
| 64%  | 100% | 1  |
| 100% | 100% | 2  |
| 100% | 100% | 0  |
| 100% | 0    | 0  |
| 99%  | 0    | 2  |
| 100% | 100% | 3  |
| 100% | 100% | 4  |
| 100% | 64%  | 0  |
| 100% | 100% | 2  |
| 0    | 100% | 0  |
| 100% | 0    | 1  |
| 100% | 100% | 3  |
| 100% | 100% | 1  |
| 100% | 0    | 0  |
| 100% | 100% | 2  |
| 100% | 64%  | 2  |
| 100% | 100% | 4  |
| 98%  | 0    | 1  |
| 0    | 100% | 1  |
| 100% | 100% | 2  |
| 100% | 100% | 2  |
| 100% | 0    | 2  |
| 0    | 0    | 2  |
| 100% | 64%  | 0  |
| 100% | 64%  | 0  |
| 100% | 64%  | 2  |
| 100% | 100% | 3  |
| 99%  | 64%  | 0  |
| 100% | 100% | 0  |
| 99%  | 64%  | 1  |
| 98%  | 64%  | 1  |
| 100% | 100% | 2  |
| 100% | 100% | 3  |
| 100% | 0    | 2  |
| 100% | 100% | 1  |
| 0    | 100% | 1  |
| 99%  | 64%  | 1  |
| 100% | 100% | 3  |



|      |      |    |
|------|------|----|
| 100% | 100% | 15 |
| 100% | 100% | 20 |
| 100% | 100% | 6  |
| 100% | 100% | 0  |
| 100% | 100% | 2  |
| 100% | 100% | 6  |
| 100% | 0    | 4  |
| 100% | 0    | 1  |
| 100% | 100% | 4  |
| 100% | 100% | 2  |
| 100% | 100% | 7  |
| 100% | 100% | 0  |
| 100% | 100% | 1  |
| 100% | 100% | 2  |
| 100% | 0    | 0  |
| 100% | 64%  | 1  |
| 100% | 100% | 0  |
| 100% | 0    | 1  |
| 100% | 100% | 11 |
| 100% | 100% | 10 |
| 100% | 64%  | 1  |
| 100% | 64%  | 4  |
| 100% | 100% | 1  |
| 100% | 0    | 0  |
| 0    | 100% | 1  |
| 100% | 64%  | 0  |
| 100% | 100% | 5  |
| 100% | 100% | 9  |
| 100% | 100% | 4  |
| 100% | 100% | 4  |
| 100% | 64%  | 2  |
| 100% | 100% | 4  |
| 100% | 0    | 2  |
| 100% | 42%  | 0  |
| 100% | 100% | 18 |
| 100% | 64%  | 0  |
| 100% | 100% | 4  |
| 100% | 64%  | 0  |
| 100% | 100% | 0  |
| 100% | 64%  | 0  |
| 100% | 100% | 6  |
| 100% | 100% | 6  |
| 100% | 100% | 7  |
| 100% | 100% | 16 |
| 100% | 64%  | 1  |
| 100% | 100% | 0  |
| 0    | 64%  | 3  |
| 100% | 100% | 30 |
| 100% | 100% | 5  |
| 100% | 0    | 0  |
| 100% | 64%  | 1  |
| 100% | 100% | 0  |
| 100% | 100% | 2  |
| 100% | 64%  | 0  |
| 100% | 100% | 3  |
| 100% | 100% | 11 |
| 98%  | 64%  | 2  |
| 100% | 100% | 0  |
| 100% | 100% | 10 |
| 100% | 100% | 0  |
| 100% | 100% | 6  |
| 100% | 64%  | 1  |
| 100% | 100% | 3  |
| 99%  | 0    | 1  |

|      |      |    |
|------|------|----|
| 64%  | 100% | 3  |
| 100% | 0    | 0  |
| 0    | 100% | 1  |
| 100% | 100% | 0  |
| 100% | 100% | 12 |
| 100% | 100% | 22 |
| 0    | 100% | 0  |
| 100% | 100% | 5  |
| 100% | 0    | 3  |
| 100% | 0    | 0  |
| 100% | 0    | 1  |
| 100% | 64%  | 1  |
| 100% | 100% | 4  |
| 100% | 0    | 1  |
| 100% | 98%  | 1  |
| 100% | 100% | 3  |
| 100% | 64%  | 1  |
| 64%  | 100% | 0  |
| 100% | 100% | 6  |
| 100% | 100% | 3  |
| 100% | 98%  | 1  |
| 64%  | 100% | 1  |
| 100% | 100% | 0  |
| 100% | 100% | 4  |
| 99%  | 0    | 0  |
| 0    | 0    | 1  |
| 100% | 100% | 2  |
| 100% | 100% | 3  |
| 100% | 64%  | 0  |
| 100% | 100% | 0  |
| 100% | 0    | 1  |
| 100% | 64%  | 2  |
| 100% | 100% | 7  |
| 100% | 100% | 22 |
| 100% | 100% | 2  |
| 100% | 100% | 3  |
| 100% | 100% | 26 |
| 64%  | 0    | 2  |
| 100% | 100% | 2  |
| 100% | 0    | 0  |
| 100% | 100% | 2  |
| 100% | 100% | 2  |
| 100% | 100% | 9  |
| 100% | 64%  | 2  |
| 100% | 0    | 0  |
| 100% | 90%  | 0  |
| 100% | 0    | 2  |
| 64%  | 0    | 3  |
| 100% | 0    | 0  |
| 100% | 100% | 2  |
| 100% | 100% | 5  |
| 100% | 100% | 0  |
| 99%  | 64%  | 0  |
| 100% | 100% | 0  |
| 100% | 100% | 4  |

| # Unique peptide H23-Rep2 (CRL5800-S2-For) | # Unique peptide H23-Rep3 (CRL5800-S3-For) | # Unique peptide Control |
|--------------------------------------------|--------------------------------------------|--------------------------|
| 4                                          | 0                                          | 0                        |
| 7                                          | 4                                          | 0                        |
| 4                                          | 2                                          | 0                        |
| 0                                          | 1                                          | 0                        |
| 2                                          | 2                                          | 0                        |
| 4                                          | 2                                          | 0                        |
| 11                                         | 10                                         | 0                        |
| 2                                          | 0                                          | 0                        |
| 0                                          | 0                                          | 0                        |
| 0                                          | 0                                          | 0                        |
| 7                                          | 7                                          | 0                        |
| 2                                          | 1                                          | 0                        |
| 2                                          | 1                                          | 0                        |
| 2                                          | 2                                          | 0                        |
| 0                                          | 0                                          | 0                        |
| 3                                          | 3                                          | 0                        |
| 2                                          | 3                                          | 0                        |
| 16                                         | 15                                         | 0                        |
| 25                                         | 20                                         | 0                        |
| 11                                         | 9                                          | 0                        |
| 2                                          | 3                                          | 0                        |
| 7                                          | 4                                          | 0                        |
| 2                                          | 1                                          | 0                        |
| 6                                          | 4                                          | 0                        |
| 3                                          | 3                                          | 0                        |
| 2                                          | 2                                          | 0                        |
| 2                                          | 0                                          | 0                        |
| 1                                          | 1                                          | 0                        |
| 26                                         | 22                                         | 2                        |
| 5                                          | 3                                          | 0                        |
| 20                                         | 18                                         | 0                        |
| 3                                          | 1                                          | 0                        |
| 4                                          | 4                                          | 0                        |
| 3                                          | 3                                          | 0                        |
| 7                                          | 4                                          | 0                        |
| 28                                         | 0                                          | 0                        |
| 0                                          | 25                                         | 1                        |
| 3                                          | 0                                          | 0                        |
| 16                                         | 16                                         | 1                        |
| 2                                          | 0                                          | 0                        |
| 1                                          | 0                                          | 0                        |
| 4                                          | 6                                          | 0                        |
| 2                                          | 1                                          | 0                        |
| 2                                          | 1                                          | 0                        |
| 13                                         | 15                                         | 0                        |
| 0                                          | 1                                          | 0                        |
| 10                                         | 10                                         | 0                        |
| 7                                          | 8                                          | 0                        |
| 2                                          | 0                                          | 0                        |
| 4                                          | 5                                          | 0                        |
| 1                                          | 0                                          | 0                        |
| 8                                          | 7                                          | 0                        |
| 4                                          | 5                                          | 0                        |
| 4                                          | 6                                          | 1                        |
| 9                                          | 9                                          | 0                        |
| 0                                          | 5                                          | 0                        |
| 4                                          | 0                                          | 0                        |
| 2                                          | 4                                          | 0                        |
| 0                                          | 2                                          | 0                        |
| 0                                          | 2                                          | 0                        |

|   |   |   |
|---|---|---|
| 2 | 1 | 0 |
| 2 | 0 | 0 |
| 4 | 2 | 0 |
| 3 | 3 | 0 |
| 2 | 0 | 0 |
| 4 | 4 | 0 |
| 1 | 2 | 0 |
| 2 | 0 | 0 |
| 6 | 7 | 0 |
| 1 | 1 | 0 |
| 3 | 3 | 0 |
| 3 | 2 | 0 |
| 2 | 1 | 0 |
| 2 | 2 | 0 |
| 3 | 1 | 0 |
| 1 | 0 | 0 |
| 8 | 8 | 0 |
| 2 | 2 | 0 |
| 2 | 4 | 0 |
| 2 | 0 | 0 |
| 2 | 1 | 0 |
| 1 | 3 | 0 |
| 3 | 1 | 0 |
| 1 | 1 | 0 |
| 3 | 1 | 0 |
| 1 | 1 | 0 |
| 2 | 1 | 0 |
| 4 | 3 | 0 |
| 1 | 2 | 0 |
| 2 | 1 | 0 |
| 1 | 1 | 0 |
| 1 | 0 | 0 |
| 2 | 1 | 0 |
| 1 | 2 | 0 |
| 2 | 0 | 0 |
| 2 | 4 | 0 |
| 2 | 1 | 0 |
| 2 | 1 | 0 |
| 3 | 2 | 0 |
| 0 | 7 | 0 |
| 6 | 2 | 0 |
| 2 | 3 | 0 |
| 8 | 3 | 0 |
| 2 | 3 | 0 |
| 6 | 6 | 0 |
| 1 | 0 | 0 |
| 7 | 5 | 0 |
| 2 | 0 | 0 |
| 3 | 4 | 0 |
| 1 | 1 | 0 |
| 1 | 1 | 0 |
| 0 | 1 | 0 |
| 1 | 2 | 0 |
| 2 | 4 | 0 |
| 1 | 2 | 0 |
| 9 | 5 | 0 |
| 4 | 3 | 0 |
| 4 | 4 | 0 |
| 7 | 4 | 0 |
| 0 | 2 | 0 |
| 4 | 1 | 0 |
| 0 | 4 | 0 |
| 2 | 2 | 0 |

|    |    |   |
|----|----|---|
| 2  | 0  | 0 |
| 1  | 3  | 0 |
| 3  | 3  | 0 |
| 1  | 1  | 0 |
| 2  | 2  | 0 |
| 1  | 1  | 0 |
| 1  | 2  | 0 |
| 6  | 4  | 0 |
| 1  | 1  | 0 |
| 1  | 1  | 0 |
| 8  | 9  | 0 |
| 7  | 7  | 0 |
| 5  | 2  | 0 |
| 2  | 1  | 0 |
| 0  | 2  | 0 |
| 3  | 1  | 0 |
| 1  | 2  | 0 |
| 11 | 11 | 0 |
| 1  | 4  | 0 |
| 3  | 2  | 0 |
| 1  | 0  | 0 |
| 14 | 14 | 0 |
| 0  | 0  | 0 |
| 8  | 7  | 0 |
| 21 | 17 | 0 |
| 16 | 16 | 0 |
| 2  | 0  | 0 |
| 4  | 1  | 0 |
| 4  | 4  | 0 |
| 6  | 0  | 0 |
| 0  | 8  | 0 |
| 0  | 8  | 0 |
| 8  | 7  | 0 |
| 0  | 1  | 0 |
| 1  | 0  | 0 |
| 2  | 1  | 0 |
| 2  | 3  | 0 |
| 1  | 2  | 0 |
| 2  | 3  | 0 |
| 9  | 6  | 0 |
| 3  | 2  | 0 |
| 2  | 0  | 0 |
| 3  | 2  | 0 |
| 2  | 1  | 0 |
| 9  | 7  | 0 |
| 0  | 2  | 0 |
| 3  | 0  | 0 |
| 4  | 2  | 0 |
| 2  | 3  | 0 |
| 0  | 0  | 0 |
| 4  | 2  | 0 |
| 4  | 3  | 0 |
| 6  | 8  | 0 |
| 4  | 4  | 0 |
| 3  | 0  | 0 |
| 2  | 0  | 0 |
| 2  | 0  | 0 |
| 1  | 0  | 0 |
| 1  | 0  | 0 |
| 9  | 6  | 0 |
| 4  | 1  | 0 |
| 1  | 0  | 0 |
| 8  | 10 | 0 |

|    |    |   |
|----|----|---|
| 6  | 4  | 1 |
| 4  | 6  | 0 |
| 4  | 3  | 0 |
| 8  | 5  | 0 |
| 0  | 1  | 0 |
| 2  | 3  | 0 |
| 3  | 4  | 0 |
| 4  | 5  | 0 |
| 0  | 6  | 0 |
| 2  | 0  | 0 |
| 10 | 10 | 0 |
| 2  | 1  | 0 |
| 3  | 4  | 0 |
| 2  | 0  | 0 |
| 0  | 1  | 0 |
| 3  | 1  | 0 |
| 2  | 3  | 0 |
| 1  | 0  | 0 |
| 2  | 1  | 0 |
| 4  | 2  | 0 |
| 1  | 2  | 0 |
| 3  | 1  | 0 |
| 1  | 2  | 0 |
| 1  | 0  | 0 |
| 2  | 1  | 0 |
| 4  | 1  | 0 |
| 3  | 1  | 0 |
| 4  | 4  | 0 |
| 2  | 3  | 0 |
| 2  | 3  | 0 |
| 0  | 3  | 0 |
| 2  | 0  | 0 |
| 2  | 2  | 0 |
| 4  | 4  | 0 |
| 3  | 4  | 0 |
| 1  | 3  | 0 |
| 1  | 1  | 0 |
| 6  | 0  | 0 |
| 3  | 2  | 0 |
| 3  | 1  | 0 |
| 2  | 1  | 0 |
| 3  | 0  | 0 |
| 11 | 13 | 0 |
| 4  | 2  | 0 |
| 5  | 3  | 0 |
| 8  | 5  | 0 |
| 11 | 9  | 0 |
| 16 | 22 | 0 |
| 11 | 8  | 0 |
| 2  | 2  | 0 |
| 2  | 0  | 0 |
| 0  | 0  | 0 |
| 2  | 1  | 0 |
| 2  | 1  | 0 |
| 2  | 1  | 0 |
| 4  | 1  | 0 |
| 1  | 1  | 0 |
| 2  | 1  | 0 |
| 4  | 3  | 0 |
| 2  | 1  | 0 |
| 3  | 0  | 0 |
| 3  | 3  | 0 |
| 3  | 1  | 0 |

|    |    |   |
|----|----|---|
| 2  | 0  | 0 |
| 6  | 8  | 0 |
| 4  | 3  | 0 |
| 3  | 2  | 0 |
| 2  | 1  | 0 |
| 17 | 20 | 0 |
| 2  | 1  | 0 |
| 2  | 0  | 0 |
| 1  | 1  | 0 |
| 2  | 1  | 0 |
| 9  | 7  | 0 |
| 0  | 0  | 0 |
| 1  | 2  | 0 |
| 1  | 3  | 0 |
| 2  | 1  | 0 |
| 4  | 1  | 0 |
| 0  | 2  | 0 |
| 2  | 0  | 0 |
| 2  | 5  | 0 |
| 2  | 1  | 0 |
| 14 | 5  | 0 |
| 3  | 0  | 0 |
| 2  | 1  | 0 |
| 15 | 11 | 0 |
| 4  | 1  | 0 |
| 3  | 0  | 0 |
| 5  | 2  | 0 |
| 1  | 0  | 0 |
| 3  | 2  | 0 |
| 2  | 1  | 0 |
| 2  | 1  | 0 |
| 3  | 2  | 0 |
| 5  | 9  | 0 |
| 5  | 3  | 0 |
| 2  | 1  | 0 |
| 50 | 49 | 0 |
| 4  | 5  | 0 |
| 2  | 0  | 0 |
| 7  | 8  | 0 |
| 1  | 2  | 0 |
| 3  | 4  | 0 |
| 2  | 0  | 0 |
| 5  | 3  | 0 |
| 5  | 4  | 0 |
| 0  | 0  | 0 |
| 3  | 3  | 0 |
| 4  | 2  | 0 |
| 3  | 3  | 0 |
| 3  | 2  | 0 |
| 0  | 0  | 0 |
| 3  | 0  | 0 |
| 11 | 6  | 0 |
| 13 | 13 | 2 |
| 2  | 0  | 0 |
| 2  | 1  | 0 |
| 2  | 0  | 0 |
| 8  | 7  | 0 |
| 1  | 2  | 0 |
| 1  | 0  | 0 |
| 13 | 11 | 0 |
| 4  | 5  | 0 |
| 7  | 6  | 0 |

|    |    |   |
|----|----|---|
| 1  | 0  | 0 |
| 2  | 3  | 0 |
| 2  | 2  | 0 |
| 3  | 0  | 0 |
| 4  | 3  | 0 |
| 3  | 1  | 0 |
| 1  | 2  | 0 |
| 5  | 2  | 0 |
| 2  | 0  | 0 |
| 0  | 0  | 0 |
| 3  | 5  | 0 |
| 1  | 1  | 0 |
| 0  | 0  | 0 |
| 1  | 2  | 0 |
| 2  | 1  | 0 |
| 12 | 9  | 0 |
| 5  | 5  | 0 |
| 2  | 0  | 0 |
| 7  | 8  | 0 |
| 3  | 2  | 0 |
| 0  | 3  | 0 |
| 4  | 0  | 0 |
| 6  | 5  | 0 |
| 4  | 0  | 0 |
| 1  | 2  | 0 |
| 0  | 1  | 0 |
| 11 | 12 | 1 |
| 3  | 3  | 0 |
| 1  | 1  | 0 |
| 1  | 1  | 0 |
| 1  | 1  | 0 |
| 8  | 12 | 0 |
| 2  | 1  | 0 |
| 8  | 0  | 0 |
| 4  | 3  | 0 |
| 4  | 5  | 0 |
| 2  | 1  | 0 |
| 3  | 0  | 0 |
| 0  | 3  | 0 |
| 0  | 3  | 0 |
| 2  | 1  | 0 |
| 3  | 1  | 0 |
| 2  | 1  | 0 |
| 6  | 7  | 0 |
| 1  | 2  | 0 |
| 1  | 1  | 0 |
| 6  | 5  | 0 |
| 1  | 2  | 0 |
| 1  | 0  | 0 |
| 2  | 0  | 0 |
| 0  | 4  | 0 |
| 1  | 0  | 0 |
| 7  | 7  | 0 |
| 1  | 2  | 0 |
| 2  | 1  | 0 |
| 7  | 0  | 0 |
| 15 | 11 | 1 |
| 0  | 0  | 0 |
| 4  | 6  | 0 |
| 4  | 4  | 0 |
| 2  | 0  | 0 |
| 8  | 5  | 0 |
| 4  | 0  | 0 |



|    |    |   |
|----|----|---|
| 8  | 8  | 0 |
| 4  | 1  | 0 |
| 1  | 2  | 0 |
| 2  | 0  | 0 |
| 0  | 6  | 0 |
| 5  | 0  | 0 |
| 4  | 3  | 0 |
| 28 | 26 | 0 |
| 13 | 17 | 0 |
| 10 | 12 | 0 |
| 16 | 19 | 0 |
| 10 | 7  | 0 |
| 16 | 15 | 0 |
| 24 | 22 | 1 |
| 3  | 2  | 0 |
| 5  | 7  | 0 |
| 7  | 12 | 0 |
| 4  | 4  | 0 |
| 27 | 16 | 0 |
| 8  | 8  | 0 |
| 2  | 0  | 0 |
| 6  | 7  | 0 |
| 2  | 1  | 0 |
| 8  | 7  | 0 |
| 0  | 1  | 0 |
| 11 | 10 | 2 |
| 2  | 2  | 0 |
| 8  | 8  | 0 |
| 4  | 4  | 0 |
| 4  | 1  | 0 |
| 3  | 1  | 0 |
| 4  | 7  | 0 |
| 2  | 4  | 0 |
| 6  | 3  | 0 |
| 4  | 2  | 0 |
| 2  | 3  | 0 |
| 2  | 1  | 0 |
| 1  | 1  | 0 |
| 5  | 2  | 0 |
| 2  | 1  | 0 |
| 5  | 0  | 0 |
| 0  | 2  | 0 |
| 4  | 4  | 0 |
| 1  | 2  | 0 |
| 2  | 1  | 0 |
| 1  | 1  | 0 |
| 5  | 2  | 0 |
| 5  | 1  | 0 |
| 4  | 5  | 0 |
| 11 | 9  | 0 |
| 17 | 17 | 0 |
| 9  | 13 | 0 |
| 15 | 16 | 0 |
| 11 | 12 | 0 |
| 2  | 1  | 0 |
| 10 | 0  | 0 |
| 21 | 21 | 0 |
| 2  | 1  | 0 |
| 21 | 18 | 0 |
| 15 | 16 | 0 |
| 8  | 10 | 0 |
| 5  | 4  | 0 |
| 4  | 6  | 0 |

|    |    |   |
|----|----|---|
| 5  | 2  | 0 |
| 4  | 1  | 0 |
| 2  | 2  | 0 |
| 2  | 1  | 0 |
| 2  | 1  | 0 |
| 7  | 4  | 0 |
| 16 | 14 | 0 |
| 1  | 0  | 0 |
| 3  | 4  | 0 |
| 4  | 6  | 0 |
| 2  | 0  | 0 |
| 2  | 0  | 0 |
| 2  | 2  | 0 |
| 1  | 2  | 0 |
| 2  | 0  | 0 |
| 2  | 0  | 0 |
| 2  | 0  | 0 |
| 1  | 2  | 0 |
| 17 | 14 | 0 |
| 2  | 0  | 0 |
| 4  | 5  | 0 |
| 1  | 0  | 0 |
| 1  | 2  | 0 |
| 7  | 4  | 0 |
| 0  | 4  | 0 |
| 3  | 1  | 0 |
| 5  | 4  | 0 |
| 6  | 1  | 0 |
| 1  | 2  | 0 |
| 2  | 0  | 0 |
| 1  | 1  | 0 |
| 6  | 6  | 0 |
| 2  | 1  | 0 |
| 6  | 0  | 0 |
| 4  | 3  | 0 |
| 3  | 4  | 0 |
| 2  | 1  | 0 |
| 3  | 3  | 0 |
| 2  | 0  | 0 |
| 0  | 3  | 0 |
| 1  | 3  | 0 |
| 3  | 0  | 0 |
| 2  | 0  | 0 |
| 6  | 7  | 0 |
| 5  | 8  | 0 |
| 2  | 3  | 0 |
| 2  | 1  | 0 |
| 2  | 0  | 0 |
| 2  | 0  | 0 |
| 2  | 1  | 0 |
| 2  | 1  | 0 |
| 0  | 2  | 0 |
| 2  | 2  | 0 |
| 1  | 1  | 0 |
| 2  | 0  | 0 |
| 5  | 2  | 0 |
| 3  | 4  | 0 |
| 4  | 4  | 0 |
| 5  | 3  | 0 |
| 14 | 17 | 0 |
| 4  | 6  | 0 |
| 0  | 1  | 0 |
| 3  | 2  | 0 |

|    |    |   |
|----|----|---|
| 1  | 1  | 0 |
| 6  | 6  | 0 |
| 1  | 1  | 0 |
| 1  | 0  | 0 |
| 2  | 4  | 0 |
| 12 | 14 | 0 |
| 2  | 1  | 0 |
| 3  | 1  | 0 |
| 2  | 3  | 0 |
| 2  | 1  | 0 |
| 2  | 2  | 0 |
| 1  | 1  | 0 |
| 9  | 11 | 0 |
| 2  | 1  | 0 |
| 2  | 3  | 0 |
| 1  | 5  | 0 |
| 2  | 1  | 0 |
| 3  | 2  | 0 |
| 2  | 2  | 0 |
| 6  | 2  | 0 |
| 6  | 4  | 0 |
| 10 | 10 | 0 |
| 2  | 1  | 0 |
| 0  | 2  | 0 |
| 1  | 0  | 0 |
| 20 | 19 | 0 |
| 3  | 2  | 0 |
| 6  | 3  | 0 |
| 2  | 2  | 0 |
| 5  | 6  | 0 |
| 5  | 3  | 0 |
| 0  | 3  | 0 |
| 3  | 3  | 0 |
| 5  | 4  | 0 |
| 0  | 2  | 0 |
| 2  | 0  | 0 |
| 9  | 7  | 0 |
| 9  | 6  | 0 |
| 9  | 9  | 0 |
| 2  | 1  | 0 |
| 2  | 0  | 0 |
| 3  | 2  | 0 |
| 8  | 6  | 0 |
| 1  | 1  | 0 |
| 2  | 0  | 0 |
| 6  | 6  | 0 |
| 8  | 6  | 0 |
| 0  | 1  | 0 |
| 4  | 4  | 0 |
| 0  | 2  | 0 |
| 6  | 4  | 0 |
| 2  | 0  | 0 |
| 6  | 4  | 0 |
| 3  | 4  | 0 |
| 8  | 4  | 0 |
| 10 | 7  | 0 |
| 5  | 3  | 0 |
| 2  | 2  | 0 |
| 1  | 0  | 0 |
| 7  | 6  | 0 |
| 6  | 6  | 0 |
| 6  | 6  | 0 |
| 2  | 3  | 0 |

|    |    |   |
|----|----|---|
| 2  | 0  | 0 |
| 7  | 7  | 0 |
| 2  | 1  | 0 |
| 2  | 0  | 0 |
| 2  | 2  | 0 |
| 4  | 4  | 0 |
| 3  | 3  | 0 |
| 8  | 7  | 0 |
| 19 | 18 | 2 |
| 1  | 1  | 0 |
| 4  | 0  | 0 |
| 0  | 1  | 0 |
| 1  | 1  | 0 |
| 21 | 24 | 3 |
| 13 | 12 | 0 |
| 4  | 5  | 0 |
| 10 | 7  | 0 |
| 3  | 1  | 0 |
| 15 | 10 | 0 |
| 11 | 10 | 0 |
| 9  | 12 | 0 |
| 13 | 10 | 1 |
| 1  | 3  | 0 |
| 2  | 0  | 0 |
| 1  | 1  | 0 |
| 3  | 2  | 0 |
| 10 | 10 | 0 |
| 6  | 7  | 0 |
| 2  | 0  | 0 |
| 1  | 2  | 0 |
| 1  | 2  | 0 |
| 2  | 1  | 0 |
| 2  | 1  | 0 |
| 5  | 3  | 0 |
| 0  | 2  | 0 |
| 7  | 8  | 0 |
| 1  | 2  | 0 |
| 3  | 1  | 0 |
| 12 | 11 | 1 |
| 3  | 4  | 0 |
| 2  | 2  | 0 |
| 1  | 0  | 0 |
| 7  | 7  | 0 |
| 4  | 3  | 0 |
| 5  | 0  | 0 |
| 3  | 4  | 0 |
| 4  | 1  | 0 |
| 4  | 3  | 0 |
| 13 | 16 | 0 |
| 4  | 1  | 0 |
| 4  | 4  | 0 |
| 0  | 2  | 0 |
| 4  | 3  | 0 |
| 3  | 3  | 0 |
| 2  | 2  | 0 |
| 4  | 2  | 0 |
| 3  | 4  | 0 |
| 2  | 3  | 0 |
| 0  | 2  | 0 |
| 1  | 2  | 0 |
| 1  | 1  | 0 |
| 3  | 0  | 0 |
| 4  | 2  | 0 |

|    |    |   |
|----|----|---|
| 1  | 0  | 0 |
| 2  | 0  | 0 |
| 0  | 1  | 0 |
| 2  | 1  | 0 |
| 3  | 6  | 0 |
| 3  | 3  | 0 |
| 5  | 8  | 0 |
| 3  | 3  | 0 |
| 3  | 0  | 0 |
| 1  | 2  | 0 |
| 2  | 0  | 0 |
| 15 | 13 | 0 |
| 2  | 2  | 0 |
| 2  | 0  | 0 |
| 5  | 6  | 0 |
| 2  | 1  | 0 |
| 2  | 3  | 0 |
| 13 | 9  | 0 |
| 10 | 5  | 0 |
| 1  | 1  | 0 |
| 16 | 17 | 1 |
| 3  | 1  | 0 |
| 1  | 2  | 0 |
| 1  | 5  | 0 |
| 2  | 3  | 0 |
| 4  | 0  | 0 |
| 0  | 5  | 0 |
| 0  | 4  | 0 |
| 2  | 1  | 0 |
| 7  | 4  | 0 |
| 3  | 0  | 0 |
| 4  | 1  | 0 |
| 1  | 1  | 0 |
| 2  | 1  | 0 |
| 1  | 2  | 0 |
| 0  | 3  | 0 |
| 3  | 3  | 0 |
| 3  | 1  | 0 |
| 1  | 1  | 0 |
| 4  | 4  | 0 |
| 3  | 3  | 0 |
| 2  | 0  | 0 |
| 2  | 0  | 0 |
| 2  | 1  | 0 |
| 7  | 3  | 0 |
| 1  | 0  | 0 |
| 2  | 1  | 0 |
| 3  | 3  | 0 |
| 4  | 4  | 0 |
| 1  | 0  | 0 |
| 1  | 2  | 0 |
| 3  | 2  | 0 |
| 1  | 2  | 0 |
| 0  | 2  | 0 |
| 4  | 0  | 0 |
| 2  | 1  | 0 |
| 6  | 3  | 0 |
| 2  | 2  | 0 |
| 2  | 1  | 0 |
| 1  | 0  | 0 |
| 1  | 2  | 0 |
| 1  | 2  | 0 |
| 2  | 4  | 0 |

|    |    |   |
|----|----|---|
| 2  | 0  | 0 |
| 2  | 2  | 0 |
| 1  | 1  | 0 |
| 2  | 3  | 0 |
| 2  | 1  | 0 |
| 2  | 1  | 0 |
| 2  | 1  | 0 |
| 3  | 1  | 0 |
| 1  | 3  | 0 |
| 1  | 2  | 0 |
| 2  | 1  | 0 |
| 3  | 2  | 0 |
| 4  | 3  | 0 |
| 4  | 0  | 0 |
| 13 | 14 | 0 |
| 1  | 2  | 0 |
| 3  | 3  | 0 |
| 2  | 4  | 0 |
| 0  | 0  | 0 |
| 11 | 9  | 0 |
| 2  | 0  | 0 |
| 2  | 4  | 0 |
| 12 | 10 | 0 |
| 3  | 2  | 0 |
| 2  | 3  | 0 |
| 1  | 2  | 0 |
| 5  | 2  | 0 |
| 2  | 2  | 0 |
| 5  | 0  | 0 |
| 1  | 0  | 0 |
| 10 | 4  | 0 |
| 5  | 7  | 0 |
| 2  | 1  | 0 |
| 4  | 4  | 0 |
| 0  | 3  | 0 |
| 3  | 0  | 0 |
| 9  | 3  | 0 |
| 4  | 4  | 0 |
| 1  | 0  | 0 |
| 3  | 3  | 0 |
| 2  | 1  | 0 |
| 4  | 4  | 0 |
| 1  | 0  | 0 |
| 0  | 2  | 0 |
| 2  | 2  | 0 |
| 2  | 2  | 0 |
| 2  | 0  | 0 |
| 0  | 0  | 0 |
| 2  | 1  | 0 |
| 2  | 1  | 0 |
| 2  | 1  | 0 |
| 3  | 2  | 0 |
| 1  | 1  | 0 |
| 3  | 1  | 0 |
| 1  | 1  | 0 |
| 1  | 1  | 0 |
| 3  | 2  | 0 |
| 2  | 2  | 0 |
| 2  | 0  | 0 |
| 2  | 2  | 0 |
| 0  | 2  | 0 |
| 1  | 1  | 0 |
| 4  | 2  | 0 |

|    |    |   |
|----|----|---|
| 19 | 16 | 0 |
| 19 | 17 | 1 |
| 14 | 9  | 0 |
| 9  | 3  | 0 |
| 3  | 3  | 0 |
| 6  | 4  | 0 |
| 2  | 0  | 0 |
| 5  | 0  | 0 |
| 5  | 5  | 0 |
| 2  | 3  | 0 |
| 3  | 7  | 0 |
| 4  | 3  | 0 |
| 4  | 3  | 0 |
| 2  | 2  | 0 |
| 2  | 0  | 0 |
| 3  | 1  | 0 |
| 5  | 2  | 0 |
| 2  | 0  | 0 |
| 9  | 14 | 0 |
| 10 | 13 | 0 |
| 2  | 1  | 0 |
| 2  | 1  | 0 |
| 2  | 2  | 0 |
| 2  | 0  | 0 |
| 0  | 2  | 0 |
| 2  | 1  | 0 |
| 5  | 4  | 0 |
| 8  | 10 | 0 |
| 4  | 4  | 0 |
| 3  | 1  | 0 |
| 5  | 5  | 0 |
| 2  | 0  | 0 |
| 2  | 0  | 0 |
| 20 | 24 | 2 |
| 2  | 1  | 0 |
| 5  | 2  | 0 |
| 2  | 1  | 0 |
| 8  | 3  | 0 |
| 2  | 1  | 0 |
| 6  | 7  | 0 |
| 7  | 6  | 0 |
| 6  | 7  | 0 |
| 14 | 20 | 0 |
| 2  | 1  | 0 |
| 7  | 7  | 0 |
| 0  | 1  | 0 |
| 38 | 44 | 0 |
| 7  | 7  | 0 |
| 2  | 0  | 0 |
| 3  | 1  | 0 |
| 1  | 1  | 0 |
| 4  | 2  | 0 |
| 2  | 1  | 0 |
| 2  | 4  | 0 |
| 15 | 15 | 0 |
| 1  | 1  | 0 |
| 6  | 4  | 0 |
| 10 | 12 | 0 |
| 2  | 2  | 0 |
| 7  | 7  | 0 |
| 2  | 1  | 0 |
| 3  | 4  | 0 |
| 1  | 0  | 0 |

|    |    |   |
|----|----|---|
| 1  | 2  | 0 |
| 2  | 0  | 0 |
| 0  | 2  | 0 |
| 2  | 13 | 0 |
| 13 | 3  | 0 |
| 20 | 21 | 0 |
| 0  | 4  | 0 |
| 3  | 4  | 1 |
| 3  | 0  | 0 |
| 3  | 0  | 0 |
| 2  | 0  | 0 |
| 2  | 1  | 0 |
| 4  | 6  | 0 |
| 2  | 0  | 0 |
| 2  | 1  | 0 |
| 5  | 2  | 0 |
| 4  | 1  | 0 |
| 1  | 4  | 0 |
| 5  | 6  | 0 |
| 3  | 3  | 0 |
| 3  | 1  | 0 |
| 1  | 3  | 0 |
| 3  | 2  | 0 |
| 5  | 5  | 0 |
| 1  | 0  | 0 |
| 0  | 0  | 0 |
| 2  | 2  | 0 |
| 7  | 4  | 0 |
| 3  | 1  | 0 |
| 3  | 2  | 0 |
| 5  | 0  | 0 |
| 2  | 1  | 0 |
| 11 | 6  | 0 |
| 26 | 27 | 0 |
| 6  | 6  | 0 |
| 2  | 2  | 0 |
| 26 | 27 | 1 |
| 1  | 0  | 0 |
| 4  | 4  | 0 |
| 2  | 0  | 0 |
| 2  | 4  | 0 |
| 5  | 3  | 0 |
| 9  | 8  | 0 |
| 2  | 1  | 0 |
| 2  | 0  | 0 |
| 1  | 0  | 0 |
| 2  | 0  | 0 |
| 1  | 0  | 0 |
| 2  | 0  | 0 |
| 5  | 4  | 0 |
| 9  | 6  | 0 |
| 3  | 2  | 0 |
| 1  | 1  | 0 |
| 3  | 3  | 0 |
| 4  | 6  | 0 |



| IPI                                             | SwissProt |
|-------------------------------------------------|-----------|
| IPI00794900                                     |           |
| IPI00647593                                     |           |
| IPI00738677                                     |           |
| IPI00795769                                     |           |
| IPI00175126                                     |           |
| IPI00020513,IPI00797866                         | Q15942,   |
| IPI00783641                                     |           |
| IPI00785057                                     |           |
| IPI00472724                                     |           |
| IPI00419827                                     |           |
| IPI00382617                                     | P07029,   |
| IPI00013495,IPI00302146,IPI00642960,IPI00792186 | Q8NE71    |
| IPI00063827,IPI00747859                         | Q96IU4,   |
| IPI00007334                                     | Q9UKV3,   |
| IPI00394838                                     |           |
| IPI00021290                                     | P53396,   |
| IPI00021428                                     | P68133,   |
| IPI00021439                                     | P60709,   |
| IPI00013508                                     | P12814,   |
| IPI00013808                                     | O43707,   |
| IPI00470573                                     | P61160,   |
| IPI00028091                                     | P61158,   |
| IPI00296441                                     | P00813,   |
| IPI00013897                                     | O14672,   |
| IPI00288894                                     | P78536,   |
| IPI00440932,IPI00440933,IPI00747759             | Q13443,   |
| IPI00651738                                     | Q9BV57,   |
| IPI00033030,IPI00470921                         | Q16186,   |
| IPI00374563                                     | O00468,   |
| IPI00012007                                     | P23526,   |
| IPI00555610                                     | Q09666    |
| IPI00030706                                     | O95433,   |
| IPI00000690,IPI00157908                         | O95831,   |
| IPI00010460                                     | O00170,   |
| IPI00215901,IPI00218988                         | P54819,   |
| IPI00217683                                     | Q02952,   |
| IPI00237884                                     | Q02952,   |
| IPI00413641                                     | P15121,   |
| IPI00465439                                     | P04075,   |
| IPI00153060,IPI00740170                         | Q9BY76,   |
| IPI00032958,IPI00657687,IPI00743594             | Q9NQW6,   |
| IPI00025849,IPI00449263                         | P39687,   |
| IPI00007423,IPI00759824                         | Q92688,   |
| IPI00165393,IPI00640833                         | Q9BTT0,   |
| IPI00218918                                     | P04083,   |
| IPI00414320                                     | P50995,   |
| IPI00418169                                     | P07355,   |
| IPI00329801                                     | P08758,   |
| IPI00337741                                     | P13798,   |
| IPI00215911                                     | P27695,   |
| IPI00020012,IPI00796118                         | P51693,   |
| IPI00031030,IPI00220978                         | Q06481,   |
| IPI00168479                                     | Q8NCW5    |
| IPI00021842                                     | P02649,   |
| IPI00006608,IPI00219187,IPI00412681,IPI00412924 | P05067    |
| IPI00215914                                     | P84077,   |
| IPI00215917                                     | P61204,   |
| IPI00003815,IPI00796541                         | P52565,   |
| IPI00328748                                     | P55145,   |
| IPI00005160,IPI00737530                         | O15143,   |

|                                     |         |
|-------------------------------------|---------|
| IPI00790262                         |         |
| IPI00165949                         | Q9NZ08, |
| IPI00420014                         | O75643, |
| IPI00289499                         | P31939, |
| IPI00010863                         | O00244, |
| IPI00020430,IPI00784119,IPI00794988 | Q15904, |
| IPI00168884                         | O75787, |
| IPI00007812                         | P21281, |
| IPI00641829                         | Q13838, |
| IPI00296992,IPI00397361             | P30530, |
| IPI00004656,IPI00796379             | P61769, |
| IPI00477470                         | O94766  |
| IPI00217345                         | Q9NY97, |
| IPI00215767                         | P15291, |
| IPI00299024                         | P80723, |
| IPI00006079,IPI00413671             | Q9NYF8, |
| IPI00010790,IPI00643384             | P21810, |
| IPI00301434                         | Q9H3K6, |
| IPI00019906,IPI00218019,IPI00795150 | P35613, |
| IPI00218413                         | P43251, |
| IPI00419473                         | P20290, |
| IPI00006907                         | Q9NQ88, |
| IPI00292150                         | Q14767, |
| IPI00009922                         | Q9GZT3, |
| IPI00792100                         | Q9Y224, |
| IPI00479767                         | Q09666  |
| IPI00056357                         | Q969H8, |
| IPI00014230                         | Q07021, |
| IPI00296165                         | P00736, |
| IPI00009793,IPI00795055             |         |
| IPI00009659                         | Q9NQG5, |
| IPI00295519,IPI00607570             | Q6NW34, |
| IPI00007926                         | O43598, |
| IPI00031564                         | O75223, |
| IPI00218414                         | P00918, |
| IPI00395627,IPI00552308,IPI00745851 | Q9HB71, |
| IPI00301263                         | P27708, |
| IPI00218696,IPI00333771             | Q05682, |
| IPI00075248,IPI00386621,IPI00794543 | P62158, |
| IPI00020599                         | P27797, |
| IPI00789155                         | O43852, |
| IPI00100160,IPI00604431             | Q86VP6, |
| IPI00103175                         | Q8WVQ1, |
| IPI00020984                         | P27824, |
| IPI00008274                         | Q01518, |
| IPI00011285                         | P07384, |
| IPI00005969                         | P52907, |
| IPI00026182                         | P47755, |
| IPI00218782,IPI00642256             | P47756, |
| IPI00304409                         | Q9Y2V2, |
| IPI00027443                         |         |
| IPI00295386                         | P16152, |
| IPI00010320                         | P83916, |
| IPI00297579                         | Q13185, |
| IPI00009308                         | P13500, |
| IPI00297779                         | P78371, |
| IPI00290770,IPI00553185,IPI00744315 | P49368, |
| IPI00302927                         | P50991, |
| IPI00010720                         | P48643, |
| IPI00027626                         | P40227, |
| IPI00018465                         | Q99832, |
| IPI00302925,IPI00784090             | P50990, |
| IPI00152540                         | Q6YHK3, |

|                                                   |                |
|---------------------------------------------------|----------------|
| IPI00029260                                       | P08571,        |
| IPI00012788,IPI00645816                           | O15446,O15446, |
| IPI00305064,IPI00418465,IPI00827555,IPI00827650,I | P16070,        |
| IPI00215997,IPI00657796,IPI00795937               | P21926,        |
| IPI00013122                                       | Q16543,        |
| IPI00465294                                       | Q99459,        |
| IPI00025861,IPI00744889                           | P12830,        |
| IPI00293539                                       | P55287,        |
| IPI00216677,IPI00645614,IPI00747243               | P22223,        |
| IPI00014197,IPI00798278                           |                |
| IPI00012011                                       | P23528,        |
| IPI00006601                                       | P05060,        |
| IPI00301185,IPI00306719                           | Q9BWS9         |
| IPI00099831,IPI00554485                           | Q9NPF2,        |
| IPI00216780                                       | Q8IUL8,        |
| IPI00022977                                       | P12277,        |
| IPI00658109                                       | P12532,        |
| IPI00033466                                       | Q9Y240,        |
| IPI00010896                                       | O00299,        |
| IPI00291930,IPI00397519                           | Q14677,        |
| IPI00013455,IPI00027172,IPI00217113               | P30622,        |
| IPI00007257                                       | O94985         |
| IPI00413959                                       | O94985,        |
| IPI00747063                                       | Q9BQT9,        |
| IPI00455383                                       | Q00610,        |
| IPI00291262,IPI00400826,IPI00795633               | P10909,        |
| IPI00430813                                       | P62633,        |
| IPI00177728,IPI00646632                           | Q96KP4,        |
| IPI00015262                                       | Q99439,        |
| IPI00827558                                       | Q99715,        |
| IPI00329573                                       | Q99715,        |
| IPI00748917                                       | P05997         |
| IPI00291136                                       | P12109,        |
| IPI00220613,IPI00304840                           | P12110,        |
| IPI00295857,IPI00646493                           | P53621,        |
| IPI00007058                                       | Q9BR76,        |
| IPI00008453                                       | Q9ULV4,        |
| IPI00017704                                       | Q14019,        |
| IPI00216085,IPI00797738                           | P14854,        |
| IPI00031121                                       | P16870,        |
| IPI00640372                                       | Q99829         |
| IPI00030654                                       | Q16630,        |
| IPI00301395                                       | Q9H3G5,        |
| IPI00027839                                       | P06850,        |
| IPI00009294                                       | Q9NZV1,        |
| IPI00004838                                       | P46108,        |
| IPI00305469                                       | P46108,        |
| IPI00004839                                       | P46109,        |
| IPI00031801,IPI00219148                           | P16989,        |
| IPI00398121,IPI00470891                           | O75534,        |
| IPI00022744,IPI00219994                           | P55060,        |
| IPI00442073                                       | P21291,        |
| IPI00032293                                       | P01034,        |
| IPI00021828                                       | P04080,        |
| IPI00011528,IPI00644499                           | Q05048,        |
| IPI00007778                                       | Q01459,        |
| IPI00215948,IPI00473136                           | P35221,        |
| IPI00017292,IPI00787027,IPI00787237               | P35222,        |
| IPI00290142                                       | P17812,        |
| IPI00021794,IPI00640525,IPI00791457               | P10619,        |
| IPI00295741                                       | P07858,        |
| IPI00022810                                       | P53634,        |
| IPI00011229                                       | P07339,        |

|                                                 |         |
|-------------------------------------------------|---------|
| IPI00012887                                     | P07711, |
| IPI00000013                                     | O60911, |
| IPI00002745                                     | Q9UBR2, |
| IPI00029601,IPI00062884                         | Q14247, |
| IPI00014312,IPI00382458,IPI00382459             | Q13618, |
| IPI00034319,IPI00554556,IPI00554634             | O60888  |
| IPI00013874                                     | P09341, |
| IPI00465315                                     | P99999, |
| IPI00006273                                     | O00622, |
| IPI00044326                                     | Q8NCH0, |
| IPI00028911                                     | Q14118, |
| IPI00216951                                     | P14868, |
| IPI00010182,IPI00218836,IPI00815745             | P07108  |
| IPI00003406                                     | Q16643, |
| IPI00295624                                     |         |
| IPI00220503,IPI00789792,IPI00793544             | Q13561, |
| IPI00293464,IPI00784120,IPI00786914             | Q16531, |
| IPI00001477,IPI00219996,IPI00657861             | Q08345, |
| IPI00293867                                     | P30046, |
| IPI00293655                                     | Q92499, |
| IPI00015953                                     | Q9NR30, |
| IPI00409671                                     |         |
| IPI00017617                                     | P17844, |
| IPI00306280                                     | O43583, |
| IPI00010882                                     | O00273, |
| IPI00742905                                     | Q08211  |
| IPI00003269                                     |         |
| IPI00016353                                     | O94907, |
| IPI00012535                                     | P31689, |
| IPI00003438                                     | O75937, |
| IPI00146935,IPI00235412                         | O00429  |
| IPI00171856                                     | Q9BU89, |
| IPI00020672                                     | Q9NY33, |
| IPI00257508                                     | Q16555, |
| IPI00028931                                     | Q14126, |
| IPI00473014                                     | P60981, |
| IPI00749113                                     | P33316, |
| IPI00477531                                     | Q14204, |
| IPI00019329                                     | P63167, |
| IPI00745955                                     | Q99848, |
| IPI00011416                                     | Q13011, |
| IPI00306046,IPI00399105                         | O43854  |
| IPI00396485                                     | P68104, |
| IPI00014424                                     | Q05639, |
| IPI00178440                                     | P24534, |
| IPI00642971                                     |         |
| IPI00000875,IPI00747497                         | P26641, |
| IPI00186290                                     | P13639, |
| IPI00029658,IPI00220813,IPI00220814,IPI00220815 | Q12805, |
| IPI00025840                                     | P20827, |
| IPI00024307                                     | P98172, |
| IPI00003519                                     | Q15029, |
| IPI00028381                                     | Q6UY11, |
| IPI00015077                                     | P41567, |
| IPI00219678                                     | P05198, |
| IPI00021728,IPI00793912                         | P20042, |
| IPI00297982                                     | P41091, |
| IPI00290461                                     | O75822, |
| IPI00290460                                     | O75821, |
| IPI00013068                                     | P60228, |
| IPI00747447                                     | P55884  |
| IPI00025491,IPI00555602                         | P60842, |
| IPI00012079,IPI00439415                         | P23588, |

|                                                    |                |
|----------------------------------------------------|----------------|
| IPI00386533                                        | Q04637,        |
| IPI00376005                                        | P63241,        |
| IPI00299254                                        | O60841,        |
| IPI00301936                                        | Q15717,        |
| IPI00001466                                        | Q9HC35,        |
| IPI00465248                                        | P06733,        |
| IPI00216171                                        | P09104,        |
| IPI00038378,IPI00795241                            | Q9UHY7,        |
| IPI00220797,IPI00383552,IPI00410177,IPI00410178,IF | O43768         |
| IPI00745296                                        |                |
| IPI00013452                                        | P07814,        |
| IPI00163849,IPI00645613,IPI00646339,IPI00794004,IF | Q9UBC2,        |
| IPI00029631                                        | P84090,        |
| IPI00024911                                        | P30040,        |
| IPI00009841,IPI00065554                            | Q01844,        |
| IPI00293128                                        | Q16394,        |
| IPI00004047,IPI00414468                            | Q93063,        |
| IPI00218038                                        | Q8IZP2,        |
| IPI00021923,IPI00334282                            | Q92520,        |
| IPI00030098                                        | Q14320,        |
| IPI00026781,IPI00645907                            | P49327,        |
| IPI00031411                                        | Q14517,        |
| IPI00296537                                        | P23142,        |
| IPI00296534                                        | P23142,        |
| IPI00023824,IPI00465038                            | P98095,        |
| IPI00784458                                        |                |
| IPI00101405,IPI00797614                            | P14324,        |
| IPI00021048,IPI00216269,IPI00645867,IPI00790914,IF | Q9NZM1,        |
| IPI00014398,IPI00647207                            | Q13642,        |
| IPI00396967,IPI00743342                            | Q14192,        |
| IPI00395337,IPI00657863                            | Q6UN15,        |
| IPI00413778                                        | P62942,        |
| IPI00024157                                        | Q00688,        |
| IPI00219005                                        | Q02790,        |
| IPI00059292,IPI00219306                            | P61326,Q96A72, |
| IPI00002408                                        |                |
| IPI00333541                                        | P21333,        |
| IPI00289334,IPI00382696,IPI00382697,IPI00382700,IF | O75369         |
| IPI00180707                                        | Q5SZK8,        |
| IPI00163187                                        | Q16658,        |
| IPI00029723                                        | Q12841,        |
| IPI00025155                                        | Q95633,        |
| IPI00008087,IPI00745676                            | Q8N475,        |
| IPI00375441,IPI00644386,IPI00788671                | Q96AE4,        |
| IPI00260715                                        | P35637,        |
| IPI00554715                                        | P51114,        |
| IPI00012442                                        | Q13283,        |
| IPI00760751                                        | P11413         |
| IPI00293088                                        | P10253,        |
| IPI00029605                                        | P34059,        |
| IPI00004669                                        | Q10471,        |
| IPI00026991                                        | Q8NCL4,        |
| IPI00011454                                        | Q14697,        |
| IPI00219018                                        | P04406,        |
| IPI00783097                                        | P41250,        |
| IPI00025273                                        | P22102,        |
| IPI00103554                                        | Q8WXI9,        |
| IPI00021807                                        | P04062,        |
| IPI00306543                                        | Q99988,        |
| IPI00010154                                        | P31150,        |
| IPI00031461                                        | P50395,        |
| IPI00023728                                        | Q92820,        |
| IPI00025869                                        | P06280,        |

|                                                                          |                                                                 |
|--------------------------------------------------------------------------|-----------------------------------------------------------------|
| IPI00414717,IPI00641153                                                  | Q92896,                                                         |
| IPI00220766                                                              | Q04760,                                                         |
| IPI00007102                                                              |                                                                 |
| IPI00168262                                                              | Q8NBJ5                                                          |
| IPI00018236                                                              | P17900,                                                         |
| IPI00412987,IPI00549557                                                  | P60983,                                                         |
| IPI00029079                                                              | P49915,                                                         |
| IPI00641950                                                              | P63244,                                                         |
| IPI00009305                                                              | P46926,                                                         |
| IPI00550894,IPI00744859                                                  |                                                                 |
| IPI00012102                                                              | P15586,                                                         |
| IPI00171411,IPI00759659,IPI00784293                                      | Q8NBJ4,                                                         |
| IPI00031241,IPI00743931                                                  | Q9H8Y8,                                                         |
| IPI00219029                                                              | P17174,                                                         |
| IPI00018206                                                              | P00505,                                                         |
| IPI00015688                                                              | P35052,                                                         |
| IPI00027497                                                              | P06744,                                                         |
| IPI00150961,IPI00783872                                                  | Q14444                                                          |
| IPI00651640                                                              | Q86SQ4                                                          |
| IPI00006166                                                              | O15354,                                                         |
| IPI00037448                                                              | Q9UBQ7,                                                         |
| IPI00550682                                                              |                                                                 |
| IPI00296713                                                              | P28799,                                                         |
| IPI00026314                                                              | P06396,                                                         |
| IPI00010706                                                              | P48637,                                                         |
| IPI00019755,IPI00642936                                                  | P78417,                                                         |
| IPI00219757                                                              | P09211,                                                         |
| IPI00290416                                                              | Q9NTK5,                                                         |
| IPI00018278,IPI00218448                                                  | P0C0S5,Q71UI9,                                                  |
| IPI00219038,IPI00413826                                                  | P84243,                                                         |
| IPI00021808                                                              | P12081,                                                         |
| IPI00453476,IPI00549725                                                  | P18669,                                                         |
| IPI00289601                                                              | Q92769,                                                         |
| IPI00514127                                                              | P51858                                                          |
| IPI00027851,IPI00829779                                                  | P06865,                                                         |
| IPI00012585                                                              | P07686,                                                         |
| IPI00239077                                                              | P49773,                                                         |
| IPI00217465                                                              | P16403,                                                         |
| IPI00217466                                                              | P16402,                                                         |
| IPI00045109,IPI00219037                                                  | P16104,Q96QV6,                                                  |
| IPI00081836,IPI00102165,IPI00216457,IPI00220855,IPI000219038,IPI00413826 | P0C0S8,P20671,Q16777,Q6F113,Q96KK5,Q99878,                      |
| IPI00018534,IPI00020101,IPI00152906,IPI00303133,IPI000219038,IPI00413826 | O60814,P57053,P58876,Q5QNW6,Q93079,Q99877,Q99879,Q99880,        |
| IPI00465070                                                              | P68431,                                                         |
| IPI00453473                                                              | P62805,                                                         |
| IPI00003935,IPI00152785,IPI00166293,IPI00220403,IPI000219038,IPI00413826 | P06899,P23527,P33778,Q16778,Q8N257,                             |
| IPI00171611,IPI00719351                                                  | Q71DI3,                                                         |
| IPI00472736                                                              | Q09160,                                                         |
| IPI00471955,IPI00472284,IPI00472456,IPI00646083,IPI000219038,IPI00413826 | P18464,P30464,P30484,P30487,P30488,P30490,P30491,P30495,P30496, |
| IPI00472605                                                              | P30501,                                                         |
| IPI00651697                                                              | P04222,                                                         |
| IPI00473131                                                              | Q29963,                                                         |
| IPI00028160,IPI00219877                                                  | P08397,                                                         |
| IPI00419258,IPI00644653,IPI00645948,IPI00815806                          | P09429,                                                         |
| IPI00384857                                                              | Q9UK76,                                                         |
| IPI00011913                                                              | Q13151,                                                         |
| IPI00215965                                                              | P09651,                                                         |
| IPI00396378                                                              | P22626,                                                         |
| IPI00419373                                                              | P51991,                                                         |
| IPI00334713                                                              | Q99729,                                                         |
| IPI00216592                                                              | P07910,                                                         |
| IPI00045498                                                              |                                                                 |
| IPI00479191                                                              | P31943,                                                         |
| IPI00013877,IPI00216492,IPI00216493,IPI00216494                          | P31942,                                                         |

|                                                             |         |
|-------------------------------------------------------------|---------|
| IPI00216049,IPI00216746,IPI00807545                         | P61978, |
| IPI00027834,IPI00796199                                     | P14866, |
| IPI00383296                                                 | P52272, |
| IPI00012074                                                 | O43390, |
| IPI00644079                                                 | Q00839, |
| IPI00479217                                                 | Q00839, |
| IPI00218493                                                 | P00492, |
| IPI00382470                                                 | P07900  |
| IPI00414676                                                 | P08238, |
| IPI00027230                                                 | P14625, |
| IPI00304925                                                 | P08107, |
| IPI00002966                                                 | P34932, |
| IPI00003362                                                 | P11021, |
| IPI00003865                                                 | P11142, |
| IPI00788958                                                 | P38646, |
| IPI00025512                                                 | P04792, |
| IPI00472102,IPI00784154                                     | P10809, |
| IPI00220362                                                 | P61604, |
| IPI00024284                                                 | P98160, |
| IPI00514983                                                 | Q92598, |
| IPI00643586                                                 |         |
| IPI00000877                                                 | Q9Y4L1, |
| IPI00644127                                                 | P41252, |
| IPI00008494                                                 | P05362, |
| IPI00290456                                                 | Q9UMF0, |
| IPI00297284                                                 | P18065, |
| IPI00029235                                                 | P24592, |
| IPI00016915                                                 | Q16270, |
| IPI00291987                                                 | Q8WX77  |
| IPI00297124                                                 | P40189, |
| IPI00005198                                                 | Q12905, |
| IPI00219330                                                 | Q12906, |
| IPI00009960,IPI00554469                                     | Q16891, |
| IPI00291510                                                 | P12268, |
| IPI00007402,IPI00784008                                     | O95373, |
| IPI00009342                                                 | P46940, |
| IPI00478861,IPI00549569,IPI00640098,IPI00644161,IPI00645069 |         |
| IPI00645194                                                 |         |
| IPI00010105                                                 | P56537, |
| IPI00031821                                                 | Q9Y287, |
| IPI00307092                                                 | Q15046, |
| IPI00082310                                                 | Q07666, |
| IPI00479786                                                 | Q92945  |
| IPI00472754,IPI00749513                                     |         |
| IPI00783537                                                 | Q8N163, |
| IPI00394906                                                 | Q07866, |
| IPI00002214,IPI00789457                                     | P52292, |
| IPI00012578                                                 | O00629, |
| IPI00001639                                                 | Q14974, |
| IPI00784347                                                 | P05783, |
| IPI00554648                                                 | P05787, |
| IPI00328753,IPI00337736                                     | Q86UP2, |
| IPI00027087,IPI00334532,IPI00646281                         | P32004, |
| IPI00375294                                                 | P25391, |
| IPI00218725,IPI00479834                                     | P24043, |
| IPI00783665                                                 | O15230, |
| IPI00013976                                                 | P07942, |
| IPI00296922                                                 | P55268, |
| IPI00298281                                                 | P11047, |
| IPI00217966                                                 | P00338, |
| IPI00219217                                                 | P07195, |
| IPI00000070,IPI00792252                                     | P01130, |
| IPI00219219                                                 | P09382, |

|                                                                         |         |
|-------------------------------------------------------------------------|---------|
| IPI00023673                                                             | Q08380, |
| IPI00293303                                                             | Q99538, |
| IPI00008918,IPI00220465,IPI00796222,IPI00796705                         | Q9UHB6, |
| IPI00748567                                                             | P38571, |
| IPI00026530                                                             | P49257, |
| IPI00009950                                                             | Q12907, |
| IPI00021405                                                             | P02545, |
| IPI00216952                                                             | P02545, |
| IPI00217975                                                             | P20700, |
| IPI00009771                                                             | Q03252, |
| IPI00169285                                                             |         |
| IPI00456898                                                             |         |
| IPI00217477,IPI00376756,IPI00411540,IPI00640781,IPI00014263,IPI00220894 | Q15347, |
| IPI00788271                                                             | Q15056, |
| IPI00007797                                                             | Q01469, |
| IPI00786995                                                             |         |
| IPI00028109                                                             | Q9C005, |
| IPI00782994                                                             | Q9Y4K0, |
| IPI00024292                                                             | P98164, |
| IPI00396321                                                             | Q96AG4, |
| IPI00006207,IPI00382733                                                 | Q32MZ4, |
| IPI00219871                                                             | Q95777, |
| IPI00219077                                                             | P09960, |
| IPI00514090                                                             | P09960, |
| IPI00292657                                                             | Q14914, |
| IPI00073196                                                             | Q9NS15, |
| IPI00783492                                                             |         |
| IPI00006932,IPI00216804                                                 | Q9Y383, |
| IPI00303882                                                             | Q60664, |
| IPI00256861,IPI00478226,IPI00513991,IPI00550385,IPI00018042             | Q9UPN3, |
| IPI00018042                                                             | P43358, |
| IPI00009542,IPI00477809                                                 | Q9UNF1, |
| IPI00008207                                                             | Q9UKM7, |
| IPI00745518                                                             | P27816, |
| IPI00017596                                                             | Q15691, |
| IPI00010157                                                             | P31153, |
| IPI00789551                                                             | P43243, |
| IPI00397466                                                             |         |
| IPI00016334                                                             | P43121, |
| IPI00013214                                                             | P25205, |
| IPI00031517                                                             | Q14566, |
| IPI00299904,IPI00376143                                                 | P33993, |
| IPI00291005                                                             | P40925, |
| IPI00291006                                                             | P40926, |
| IPI00010333                                                             | P21741, |
| IPI00029273,IPI00294528,IPI00792387                                     | P08581, |
| IPI00789396                                                             |         |
| IPI00022621,IPI00644827                                                 | P55001, |
| IPI00002236,IPI00334005                                                 | Q08431, |
| IPI00020407                                                             | Q09328, |
| IPI00640150                                                             |         |
| IPI00293276                                                             | P14174, |
| IPI00293748                                                             | Q9UNW1, |
| IPI00306778                                                             | P24347, |
| IPI00005707                                                             | Q9UBG0, |
| IPI00033494,IPI00220573,IPI00604523                                     | P19105, |
| IPI00219365                                                             | P26038, |
| IPI00179589                                                             | P58546, |
| IPI00019502                                                             | P35579, |
| IPI00797001                                                             | P60660, |
| IPI00743335                                                             |         |
| IPI00797126,IPI00797259                                                 | Q13765  |



|                                                             |         |
|-------------------------------------------------------------|---------|
| IPI00008787                                                 | P54802, |
| IPI00023860,IPI00789029,IPI00791065,IPI00793389             | P55209, |
| IPI00017763,IPI00788840,IPI00789437,IPI00798071             | Q99733, |
| IPI00306960,IPI00646656                                     | O43776, |
| IPI00179953,IPI00219821,IPI00332499                         | P49321, |
| IPI00604620                                                 | P19338, |
| IPI00288941                                                 | Q9HCD5, |
| IPI00022078,IPI00183085,IPI00783586                         | Q92597, |
| IPI00020008                                                 | Q15843, |
| IPI00023814,IPI00217291,IPI00472011                         | Q92859, |
| IPI00549467                                                 | Q8WUF0  |
| IPI00031753,IPI00220630                                     | P08949, |
| IPI00795292                                                 | P22392  |
| IPI00654555                                                 |         |
| IPI00304596                                                 | Q15233, |
| IPI00297655                                                 | Q04721, |
| IPI00011140                                                 | P48745, |
| IPI00017672                                                 | P00491, |
| IPI00301579                                                 | P61916, |
| IPI00026216                                                 | P55786, |
| IPI00549248                                                 | P06748, |
| IPI00220562                                                 | Q15818, |
| IPI00026946                                                 | P47972, |
| IPI00012069,IPI00619966                                     | P15559, |
| IPI00100197,IPI00397571                                     | Q9UNZ2, |
| IPI00295542                                                 | Q02818, |
| IPI00009123                                                 | P80303, |
| IPI00550746                                                 | Q9Y266, |
| IPI00646917                                                 | O43809, |
| IPI00296913,IPI00646762                                     | Q9UKK9, |
| IPI00006196,IPI00292771                                     | Q14980, |
| IPI00009901                                                 | P61970, |
| IPI00017841,IPI00419820,IPI00472517,IPI00550145             | Q99784, |
| IPI00024621,IPI00607652                                     | Q9NRN5  |
| IPI00329760,IPI00604451,IPI00784387                         | Q13438, |
| IPI00409750                                                 | Q96FW1, |
| IPI00010796                                                 | P07237, |
| IPI00299000,IPI00794875                                     | Q9UQ80, |
| IPI00008524                                                 | P11940, |
| IPI00555747                                                 | Q13310, |
| IPI00218728                                                 | P43034, |
| IPI00026546                                                 | P68402, |
| IPI00217223                                                 | P22234, |
| IPI00419979,IPI00787208                                     | Q13177, |
| IPI00177543,IPI00219041,IPI00219042,IPI00219043,IPI00219044 | P19021, |
| IPI00298547                                                 | Q99497, |
| IPI00449049                                                 | P09874, |
| IPI00018873,IPI00472879                                     | P43490, |
| IPI00016610                                                 | Q15365, |
| IPI00012066,IPI00216689,IPI00470509,IPI00796337             | Q15366, |
| IPI00215946                                                 | O60245, |
| IPI00000495                                                 | Q9BXW1  |
| IPI00411680,IPI00828189                                     | P22061, |
| IPI00021700                                                 | P12004, |
| IPI00299738                                                 | Q15113, |
| IPI00002543                                                 | Q9UKZ9, |
| IPI00002280                                                 | Q9UHG2, |
| IPI00023640                                                 | O14737, |
| IPI00246058                                                 | Q8WUM4, |
| IPI00025252                                                 | P30101, |
| IPI00009904                                                 | P13667, |
| IPI00299571,IPI00644989                                     | Q15084, |
| IPI00007935                                                 | Q96HC4, |

|                                                             |                |
|-------------------------------------------------------------|----------------|
| IPI00014850,IPI00643342                                     | Q15121,        |
| IPI00219446                                                 | P30086,        |
| IPI00257882                                                 | P12955,        |
| IPI00004534                                                 | O15067,        |
| IPI00006052                                                 | Q9UHV9,        |
| IPI00015891                                                 | Q9NQP4,        |
| IPI00643196                                                 | Q01813         |
| IPI00216691                                                 | P07737,        |
| IPI00169383                                                 | P00558,        |
| IPI00029997                                                 | O95336,        |
| IPI00550364                                                 | Q96G03,        |
| IPI00220739                                                 | O00264,        |
| IPI00299977                                                 | Q9NRX4,        |
| IPI00479186                                                 | P14618,        |
| IPI00296180                                                 | P00749,        |
| IPI00010676,IPI00215706                                     | Q03405,        |
| IPI00398002                                                 | Q15149,        |
| IPI00019580                                                 | P00747,        |
| IPI00027192                                                 | Q02809,        |
| IPI00030255                                                 | O60568,        |
| IPI00216694                                                 | P13797,        |
| IPI00643034                                                 | P55058,        |
| IPI00398435,IPI00736693                                     | O15031,        |
| IPI00018272                                                 | Q9NV59,        |
| IPI00007960,IPI00218585,IPI00410241,IPI00641231,IPI00015018 | Q15063,        |
| IPI00015018                                                 | Q15181,        |
| IPI00419585                                                 | P62937,        |
| IPI00646304                                                 | P23284,        |
| IPI00220188                                                 | Q9UNP9,        |
| IPI00006167                                                 | O15355,        |
| IPI00550451,IPI00794133,IPI00797955                         | P62136,        |
| IPI00398922                                                 | Q96C90,        |
| IPI00008380,IPI00429689,IPI00789014                         | P62714,P67775, |
| IPI00419307,IPI00554737                                     | P30153,        |
| IPI00019812,IPI00790133                                     | P53041,        |
| IPI00002412                                                 | P50897,        |
| IPI00021421,IPI00453232,IPI00552460,IPI00647927,IPI00399307 | Q9UMR5,        |
| IPI00399307                                                 | P42785         |
| IPI00000874                                                 | Q06830,        |
| IPI00024919                                                 | P30048,        |
| IPI00011937                                                 | Q13162,        |
| IPI00024915,IPI00759663                                     | P30044,        |
| IPI00220301                                                 | P30041,        |
| IPI00026154,IPI00792916                                     | P14314,        |
| IPI00064328,IPI00441473                                     | O14744,        |
| IPI00009276                                                 | Q9UNN8,        |
| IPI00004968                                                 | Q9UMS4,        |
| IPI00026941                                                 | O95084,        |
| IPI00012503,IPI00219825                                     | P07602,        |
| IPI00016832,IPI00472442                                     | P25786,        |
| IPI00219622                                                 | P25787,        |
| IPI00299155,IPI00789638,IPI00790038,IPI00795606             | P25789,        |
| IPI00291922                                                 | P28066,        |
| IPI00029623                                                 | P60900,        |
| IPI00024175                                                 | O14818,        |
| IPI00025019                                                 | P20618,        |
| IPI00028006                                                 | P49721,        |
| IPI00028004                                                 | P49720,        |
| IPI00555956                                                 | P28070,        |
| IPI00375704,IPI00479306                                     | P28074,        |
| IPI00023919,IPI00555749,IPI00745502                         | P62195,        |
| IPI00021926                                                 | P62333,        |
| IPI00299608                                                 | Q99460,        |

|                                                 |         |
|-------------------------------------------------|---------|
| IPI00105598                                     | O00231, |
| IPI00384420                                     |         |
| IPI00011603                                     | O43242, |
| IPI00019927                                     | P51665, |
| IPI00030154,IPI00479722                         | Q06323, |
| IPI00384051,IPI00746205                         | Q9UL46, |
| IPI00179964,IPI00183626,IPI00334175             | P26599, |
| IPI00789101                                     | Q15185, |
| IPI00555762                                     | Q13308, |
| IPI00008998                                     | Q8IUI5  |
| IPI00289082                                     | Q05209, |
| IPI00465186                                     | P10586, |
| IPI00743517                                     | Q13332  |
| IPI00176903,IPI00513773                         | Q6NZI2, |
| IPI00029568                                     | P26022, |
| IPI00219425                                     | P15151, |
| IPI00215980                                     | Q92692, |
| IPI00787655                                     | Q4KMG2  |
| IPI00470525                                     | P06737, |
| IPI00003919                                     | Q16769, |
| IPI00003590                                     | O00391, |
| IPI00376394,IPI00479085,IPI00783371             | Q6ZRP7, |
| IPI00020436,IPI00790785                         | Q15907, |
| IPI00016342                                     | P51149, |
| IPI00008223                                     | P54727, |
| IPI00793015                                     | P62826, |
| IPI00796462                                     |         |
| IPI00414127                                     | P43487, |
| IPI00221325                                     | P49792, |
| IPI00783829,IPI00793443                         | O00410, |
| IPI00015148                                     | P61224, |
| IPI00328319,IPI00645329                         | Q09028, |
| IPI00646512                                     |         |
| IPI00102752,IPI00220716,IPI00220717             | Q96T37, |
| IPI00001757,IPI00216659                         | Q9Y5S9, |
| IPI00304692                                     | P38159, |
| IPI00001661,IPI00747309,IPI00787306             | P18754, |
| IPI00015842                                     | Q15293, |
| IPI00178431                                     | P46063, |
| IPI00027434,IPI00647268                         | P08134, |
| IPI00008554                                     | P03950, |
| IPI00414896                                     | O00584, |
| IPI00783491                                     |         |
| IPI00647400                                     |         |
| IPI00829739                                     | Q9Y6N7  |
| IPI00307155                                     | O75116, |
| IPI00017373                                     | P35244, |
| IPI00412579,IPI00827508                         | P62906, |
| IPI00024933                                     | P30050, |
| IPI00215719                                     | Q07020, |
| IPI00215790,IPI00792410                         | P63173, |
| IPI00003918                                     | P36578, |
| IPI00000494,IPI00797983                         | P46777, |
| IPI00012772,IPI00795138,IPI00797230             | P62917, |
| IPI00794884                                     | P05388, |
| IPI00008527                                     | P05386, |
| IPI00008529                                     | P05387, |
| IPI00008438                                     | P46783, |
| IPI00026271                                     | P62263, |
| IPI00013485,IPI00479366,IPI00744451,IPI00827598 | P15880, |
| IPI00012493,IPI00794659                         | P60866, |
| IPI00179330,IPI00456429,IPI00793330             | P62987, |
| IPI00011253                                     | P23396, |

|                                                                          |                |
|--------------------------------------------------------------------------|----------------|
| IPI00419880,IPI00472119                                                  | P61247,        |
| IPI00217030                                                              | P62701,        |
| IPI00008433                                                              | P46782,        |
| IPI00013415                                                              | P62081,        |
| IPI00216587                                                              | P62241,        |
| IPI00413108,IPI00553164                                                  | P08865,        |
| IPI00027765,IPI00829898                                                  | Q9BSG5,        |
| IPI00021766                                                              | Q9NQC3,        |
| IPI00021187                                                              | Q9Y265,        |
| IPI00009104                                                              | Q9Y230,        |
| IPI00183695                                                              | P60903,        |
| IPI00013895                                                              | P31949,        |
| IPI00005648                                                              | Q14151,        |
| IPI00514587                                                              | P49591         |
| IPI00009362                                                              | P13521,        |
| IPI00006252,IPI00793201                                                  | Q12904,        |
| IPI00011564                                                              | P31431,        |
| IPI00299086,IPI00479018,IPI00794699                                      | O00560,        |
| IPI00106642                                                              | Q9HCN8,        |
| IPI00106646                                                              | Q9BRK5,        |
| IPI00170635                                                              | Q8WVN6,        |
| IPI00031510                                                              | Q14563,        |
| IPI00019209                                                              | Q99985,        |
| IPI00419724                                                              | Q9NPR2,        |
| IPI00073763                                                              | Q9C0C4,        |
| IPI00029056                                                              | P49903,        |
| IPI00014177,IPI00792151                                                  | Q15019,        |
| IPI00784614,IPI00784936                                                  | Q9UHD8,        |
| IPI00412714,IPI00470498                                                  | Q8NC51,        |
| IPI00291866,IPI00556459                                                  | P05155,        |
| IPI00032140                                                              | P50454,        |
| IPI00072377                                                              | Q01105,        |
| IPI00018276,IPI00419722,IPI00645828                                      |                |
| IPI00017451                                                              | Q15459,        |
| IPI00017341                                                              | Q15428,        |
| IPI00029764                                                              | Q12874,        |
| IPI00026089                                                              | Q75533,        |
| IPI00221106                                                              | Q13435,        |
| IPI00300371                                                              | Q15393,        |
| IPI00017339                                                              | Q15427,        |
| IPI00013890                                                              | P31947,        |
| IPI00010740                                                              | P23246,        |
| IPI00749245                                                              | Q8N474,        |
| IPI00005978,IPI00385786,IPI00796848                                      | Q01130,        |
| IPI00003377                                                              | Q16629,        |
| IPI00013949                                                              | O43765,        |
| IPI00010402                                                              | Q9H299         |
| IPI00021326                                                              |                |
| IPI00069750,IPI00797595                                                  |                |
| IPI00647217                                                              | P42285,        |
| IPI00301364                                                              | P63208,        |
| IPI00027493,IPI00554481,IPI00554611,IPI00554702,IPI000234252,IPI00797830 | P08195,        |
| IPI00150057,IPI00216047                                                  | Q92922,        |
| IPI00140420                                                              | Q8TAQ2,        |
| IPI00219483,IPI00290204                                                  | Q7KZF4,        |
| IPI00027285,IPI00220360,IPI00329512,IPI00384173,IPI00302850              | P08621,        |
| IPI00017963                                                              | P14678,P63162, |
| IPI00017964                                                              | P62314,        |
| IPI00016572                                                              | P62316,        |
| IPI00013830                                                              | P62318,        |
| IPI00218733,IPI00783680                                                  | P62308,        |
|                                                                          | Q13573,        |
|                                                                          | P00441,        |

|                                                    |         |
|----------------------------------------------------|---------|
| IPI00005292                                        | Q08629, |
| IPI00006128                                        | Q92563, |
| IPI00744706                                        | Q13813, |
| IPI00005614                                        | Q01082, |
| IPI00782992                                        | Q9UQ35, |
| IPI00009032                                        | P05455, |
| IPI00005154                                        | Q08945, |
| IPI00000001,IPI00218609,IPI00643664                | O95793  |
| IPI00005564                                        | P52823, |
| IPI00299299                                        | P48723, |
| IPI00013894                                        | P31948, |
| IPI00479997,IPI00642012,IPI00643115                | P16949, |
| IPI00294536                                        | Q9Y3F4, |
| IPI00221222                                        | P53999, |
| IPI00171412,IPI00334514,IPI00783919,IPI00784010    | Q8NB7,  |
| IPI00026970                                        | Q9Y5B9, |
| IPI00301288                                        |         |
| IPI00307200                                        | Q9UH65, |
| IPI00018140,IPI00402182,IPI00402183,IPI00402184    | O60506  |
| IPI00550363,IPI00647915                            | P37802, |
| IPI00025815                                        | Q13148, |
| IPI00329633                                        | P26639, |
| IPI00217236                                        | Q75347, |
| IPI00293126                                        | Q99426, |
| IPI00026670,IPI00410162                            | Q15370, |
| IPI00294619,IPI00788849                            | Q92734, |
| IPI00021834                                        | P10646, |
| IPI00009198                                        | P48307, |
| IPI00022462                                        | P02786, |
| IPI00000075                                        | P01137, |
| IPI00235354                                        | P61812, |
| IPI00304865                                        | Q03167, |
| IPI00294578                                        | P21980, |
| IPI00296099                                        | P07996, |
| IPI00329535                                        | P49746, |
| IPI00328840                                        | Q86V81, |
| IPI00104050                                        | Q9Y2W1, |
| IPI00794391                                        |         |
| IPI00028376                                        | O60220, |
| IPI00032292,IPI00642739                            | P01033, |
| IPI00788747                                        | P16035, |
| IPI00788802                                        | P29401, |
| IPI00784273                                        | Q9Y490, |
| IPI00443909                                        | Q9Y2B0, |
| IPI00030131                                        | P42167, |
| IPI00216230                                        | P42166, |
| IPI00031008                                        | P24821, |
| IPI00298362                                        | O00300, |
| IPI00064377                                        | Q969Z4, |
| IPI00018880,IPI00796532                            | P19438, |
| IPI00178667,IPI00218753,IPI00218754,IPI00414101,IF | P11388, |
| IPI00023137,IPI00477672                            | O14657, |
| IPI00029778,IPI00657708,IPI00742743                | Q12888, |
| IPI00306825,IPI00399265,IPI00399267,IPI00743469    | O43399, |
| IPI00465028                                        | P60174  |
| IPI00014581,IPI00018853,IPI00216135,IPI00296039,IF | P09493, |
| IPI00220709                                        | P07951, |
| IPI00178083,IPI00218319,IPI00479185                | P06753, |
| IPI00010779                                        | P67936, |
| IPI00298237,IPI00554538                            | O14773, |
| IPI00022970,IPI00742682                            | P12270, |
| IPI00009943,IPI00550900                            | P13693, |
| IPI00102661                                        |         |

|                                                             |         |
|-------------------------------------------------------------|---------|
| IPI00438229,IPI00438230                                     | Q13263, |
| IPI00641368                                                 | Q8WUA8, |
| IPI00018768                                                 | Q15631, |
| IPI00180675                                                 | Q71U36, |
| IPI00792677                                                 | P68363  |
| IPI00011654                                                 | P07437, |
| IPI00007752                                                 | P68371, |
| IPI00013683                                                 | Q13509, |
| IPI00023598                                                 | P04350, |
| IPI00641706                                                 |         |
| IPI00183508,IPI00385754                                     | Q12792, |
| IPI00410487,IPI00830092                                     | Q9GZX9  |
| IPI00216298                                                 | P10599, |
| IPI00026328                                                 | O95881, |
| IPI00008552                                                 | O76003, |
| IPI00646689                                                 | Q9BRA2, |
| IPI00031556,IPI00746657,IPI00830039                         | P26368, |
| IPI00646016                                                 |         |
| IPI00645078                                                 | P22314, |
| IPI00021347                                                 | P68036, |
| IPI00003949                                                 | P61088, |
| IPI00019599,IPI00030962,IPI00397947,IPI00447356,IPI00000000 | Q13404, |
| IPI00071180                                                 | Q9UMX0, |
| IPI00018352                                                 | P09936, |
| IPI00654779                                                 |         |
| IPI00034049,IPI00399170                                     | Q92900, |
| IPI00219913                                                 | P54578, |
| IPI00375145                                                 | P45974, |
| IPI00107113                                                 | Q9BVJ6, |
| IPI00170692                                                 | Q9POL0, |
| IPI00156689                                                 | Q99536, |
| IPI00334159                                                 | P61758, |
| IPI00291175,IPI00307162                                     | P18206, |
| IPI00022774                                                 | P55072, |
| IPI00069058                                                 | O15240  |
| IPI00746388                                                 | P15311, |
| IPI00418471                                                 | P08670, |
| IPI00295400,IPI00412737                                     | P23381, |
| IPI00746165                                                 | O75083, |
| IPI00012202                                                 | Q9BQA1, |
| IPI00298961,IPI00784388                                     | O14980, |
| IPI00220834                                                 | P13010, |
| IPI00465430,IPI00644712                                     | P12956, |
| IPI00012197                                                 | Q9H773  |
| IPI00432723                                                 | Q9H1B5, |
| IPI00216919                                                 |         |
| IPI00007074                                                 | P54577, |
| IPI00385699                                                 | P67809, |
| IPI00008569                                                 |         |
| IPI00216318,IPI00759832                                     | P31946, |
| IPI00000816                                                 | P62258, |
| IPI00220642                                                 | P61981, |
| IPI00216319                                                 | Q04917, |
| IPI00018146                                                 | P27348, |
| IPI00021263                                                 | P63104, |













P62807,

0498,P30685,
