# Supplementary material
Source: PubMed Central journal article supplement (PMC2816016)
Supplement: M900134-MCP200_5.pdf [file M900134-MCP200_5.pdf]

## Supplementary Table 10: List of total unique proteins identified by mass sp

| Protein name                                                                                  |
|-----------------------------------------------------------------------------------------------|
| Gene_Symbol=- 105 kDa protein                                                                 |
| Gene_Symbol=- 12 kDa protein                                                                  |
| Gene_Symbol=- 19 kDa protein                                                                  |
| Gene_Symbol=- 21 kDa protein                                                                  |
| Gene_Symbol=- 23 kDa protein                                                                  |
| Gene_Symbol=- 25 kDa protein                                                                  |
| Gene_Symbol=- 27 kDa protein                                                                  |
| Gene_Symbol=- 30 kDa protein                                                                  |
| Gene_Symbol=- 31 kDa protein                                                                  |
| Gene_Symbol=- 35 kDa protein                                                                  |
| Gene_Symbol=- 52 kDa protein                                                                  |
| Gene_Symbol=- 64 kDa protein                                                                  |
| Gene_Symbol=- 67 kDa protein                                                                  |
| Gene_Symbol=- 71 kDa protein                                                                  |
| Gene_Symbol=- CD68 antigen variant (Fragment)                                                 |
| Gene_Symbol=- DAZAP1/MEF2D fusion protein                                                     |
| Gene_Symbol=- Eukaryotic translation elongation factor 1 alpha-like 3                         |
| Gene_Symbol=- HDCMB21P                                                                        |
| Gene_Symbol=- Hypothetical protein                                                            |
| Gene_Symbol=- Novel protein similar to Pre-B cell enhancing factor                            |
| Gene_Symbol=- P37 AUF1                                                                        |
| Gene_Symbol=- P40                                                                             |
| Gene_Symbol=- Protein                                                                         |
| Gene_Symbol=- Trypsinogen C                                                                   |
| Gene_Symbol=AARS 107 kDa protein                                                              |
| Gene_Symbol=AARS Alanyl-tRNA synthetase, cytoplasmic                                          |
| Gene_Symbol=ABCE1 ATP-binding cassette sub-family E member 1                                  |
| Gene_Symbol=ABCF1 Isoform 2 of ATP-binding cassette sub-family F member 1                     |
| Gene_Symbol=ABHD14B Isoform 1 of Abhydrolase domain-containing protein 14B                    |
| Gene_Symbol=ABP1 Isoform 1 of Amiloride-sensitive amine oxidase [copper-containing] precursor |
| Gene_Symbol=ACAT1 ACAT1 protein                                                               |
| Gene_Symbol=ACAT2 Acetyl-CoA acetyltransferase, cytosolic                                     |
| Gene_Symbol=ACBD3 Golgi resident protein GCP60                                                |
| Gene_Symbol=ACE Angiotensin-converting enzyme, somatic isoform precursor                      |
| Gene_Symbol=ACIN1 Isoform 1 of Apoptotic chromatin condensation inducer in the nucleus        |
| Gene_Symbol=ACLY ATP citrate lyase isoform 2                                                  |
| Gene_Symbol=ACLY ATP-citrate synthase                                                         |
| Gene_Symbol=ACOT7 Isoform 2 of Cytosolic acyl coenzyme A thioester hydrolase                  |
| Gene_Symbol=ACP1 Isoform 1 of Low molecular weight phosphotyrosine protein phosphatase        |
| Gene_Symbol=ACP5 Tartrate-resistant acid phosphatase type 5 precursor                         |
| Gene_Symbol=ACTA1 Actin, alpha skeletal muscle                                                |
| Gene_Symbol=ACTB Actin, cytoplasmic 1                                                         |
| Gene_Symbol=ACTG1 Actin, cytoplasmic 2                                                        |
| Gene_Symbol=ACTN1 Actinin alpha 1 isoform b                                                   |
| Gene_Symbol=ACTN1 Alpha-actinin-1                                                             |
| Gene_Symbol=ACTN4 Alpha-actinin-4                                                             |
| Gene_Symbol=ACTR2 Actin-like protein 2                                                        |
| Gene_Symbol=ACTR2 actin-related protein 2 isoform a                                           |
| Gene_Symbol=ACTR3 Actin-like protein 3                                                        |

|                                                                                                |
|------------------------------------------------------------------------------------------------|
| Gene_Symbol=ADA Adenosine deaminase                                                            |
| Gene_Symbol=ADAM10 ADAM 10 precursor                                                           |
| Gene_Symbol=ADAM15 a disintegrin and metalloproteinase domain 15 isoform 3 preproprotein       |
| Gene_Symbol=ADAM15 a disintegrin and metalloproteinase domain 15 isoform 4 preproprotein       |
| Gene_Symbol=ADAM17 Isoform A of ADAM 17 precursor                                              |
| Gene_Symbol=ADAM17 Isoform B of ADAM 17 precursor                                              |
| Gene_Symbol=ADAM19 Isoform A of ADAM 19 precursor                                              |
| Gene_Symbol=ADAM23 Isoform Alpha of ADAM 23 precursor                                          |
| Gene_Symbol=ADAM9 Isoform 1 of ADAM 9 precursor                                                |
| Gene_Symbol=ADAMTS1 ADAMTS-1 precursor                                                         |
| Gene_Symbol=ADAMTS12 ADAM metalloproteinase with thrombospondin type 1 motif, 12 preproprotein |
| Gene_Symbol=ADAMTS19 ADAMTS-19 precursor                                                       |
| Gene_Symbol=ADAMTSL1 ADAMTS-like 1 isoform 1                                                   |
| Gene_Symbol=ADAMTSL2 ADAMTS-like 2                                                             |
| Gene_Symbol=ADAR Isoform 2 of Double-stranded RNA-specific adenosine deaminase                 |
| Gene_Symbol=ADAR Isoform 4 of Double-stranded RNA-specific adenosine deaminase                 |
| Gene_Symbol=ADCYAP1 Pituitary adenylate cyclase-activating polypeptide precursor               |
| Gene_Symbol=ADH5 Class III alCohol dehydrogenase 5 Chi subunit                                 |
| Gene_Symbol=ADI1 Isoform 1 of 1,2-dihydroxy-3-keto-5-methylthiopentene dioxygenase             |
| Gene_Symbol=ADK Isoform Short of Adenosine kinase                                              |
| Gene_Symbol=ADRM1 Adhesion-regulating molecule 1 precursor                                     |
| Gene_Symbol=ADSS Adenylosuccinate synthetase isozyme 2                                         |
| Gene_Symbol=AGR2 AGR2                                                                          |
| Gene_Symbol=AGRN Agrin precursor                                                               |
| Gene_Symbol=AGT Angiotensinogen precursor                                                      |
| Gene_Symbol=AHCY Adenosylhomocysteinase                                                        |
| Gene_Symbol=AHNAK 313 kDa protein                                                              |
| Gene_Symbol=AHSA1 Activator of 90 kDa heat shock protein ATPase homolog 1                      |
| Gene_Symbol=AIFM1 Isoform 1 of Apoptosis-inducing factor 1, mitochondrial precursor            |
| Gene_Symbol=AIP AH receptor-interacting protein                                                |
| Gene_Symbol=AK2 Isoform 1 of Adenylate kinase isoenzyme 2, mitochondrial                       |
| Gene_Symbol=AKAP12 A-kinase anchor protein 12 isoform 2                                        |
| Gene_Symbol=AKAP12 Isoform 1 of A-kinase anchor protein 12                                     |
| Gene_Symbol=AKR1A1 Alcohol dehydrogenase                                                       |
| Gene_Symbol=AKR1B1 Aldose reductase                                                            |
| Gene_Symbol=AKR1B10 Aldo-keto reductase family 1 member B10                                    |
| Gene_Symbol=AKR1C1 Aldo-keto reductase family 1 member C1                                      |
| Gene_Symbol=AKR1C2 Aldo-keto reductase family 1 member C2                                      |
| Gene_Symbol=AKR1C3 Aldo-keto reductase family 1 member C3                                      |
| Gene_Symbol=AKR7A2 Aflatoxin B1 aldehyde reductase member 2                                    |
| Gene_Symbol=AKR7A3 Aflatoxin B1 aldehyde reductase member 3                                    |
| Gene_Symbol=ALB ALB protein                                                                    |
| Gene_Symbol=ALCAM Isoform 1 of CD166 antigen precursor                                         |
| Gene_Symbol=ALDH1A1 Retinal dehydrogenase 1                                                    |
| Gene_Symbol=ALDH3A1 Aldehyde dehydrogenase, dimeric NADP-preferring                            |
| Gene_Symbol=ALDH3A2 Isoform 1 of Fatty aldehyde dehydrogenase                                  |
| Gene_Symbol=ALDH9A1 aldehyde dehydrogenase 9A1                                                 |
| Gene_Symbol=ALDOA Fructose-bisphosphate aldolase A                                             |
| Gene_Symbol=ALDOC Fructose-bisphosphate aldolase C                                             |
| Gene_Symbol=AMBP AMBP protein precursor                                                        |
| Gene_Symbol=ANGPTL4 Angiopoietin-related protein 4 precursor                                   |
| Gene_Symbol=ANLN Isoform 2 of Actin-binding protein anillin                                    |
| Gene_Symbol=ANP32A Acidic leucine-rich nuclear phosphoprotein 32 family member A               |

|                                                                                                      |
|------------------------------------------------------------------------------------------------------|
| Gene_Symbol=ANP32B Isoform 1 of Acidic leucine-rich nuclear phosphoprotein 32 family member B        |
| Gene_Symbol=ANP32E Acidic leucine-rich nuclear phosphoprotein 32 family member E                     |
| Gene_Symbol=ANTXR1 Isoform 1 of Anthrax toxin receptor 1 precursor                                   |
| Gene_Symbol=ANXA1 Annexin A1                                                                         |
| Gene_Symbol=ANXA11 Annexin A11                                                                       |
| Gene_Symbol=ANXA2 annexin A2 isoform 1                                                               |
| Gene_Symbol=ANXA5 Annexin A5                                                                         |
| Gene_Symbol=AP3D1 Isoform 1 of AP-3 complex subunit delta-1                                          |
| Gene_Symbol=APEH Acylamino-acid-releasing enzyme                                                     |
| Gene_Symbol=APEX1 DNA-(apurinic or apyrimidinic site) lyase                                          |
| Gene_Symbol=API5 Isoform 4 of Apoptosis inhibitor 5                                                  |
| Gene_Symbol=APLP1 Amyloid-like protein 1 precursor                                                   |
| Gene_Symbol=APLP2 Isoform 1 of Amyloid-like protein 2 precursor                                      |
| Gene_Symbol=APOA1BP Apolipoprotein A-I binding protein                                               |
| Gene_Symbol=APOA1BP apolipoprotein A-I binding protein precursor                                     |
| Gene_Symbol=APOE Apolipoprotein E precursor                                                          |
| Gene_Symbol=APP Isoform APP770 of Amyloid beta A4 protein precursor (Fragment)                       |
| Gene_Symbol=APRT Adenine phosphoribosyltransferase                                                   |
| Gene_Symbol=ARCN1 Coatomer subunit delta                                                             |
| Gene_Symbol=ARF1 ADP-ribosylation factor 1                                                           |
| Gene_Symbol=ARF3 ADP-ribosylation factor 3                                                           |
| Gene_Symbol=ARFIP1 Isoform A of Arfaptin-1                                                           |
| Gene_Symbol=ARHGDI20 20 kDa protein                                                                  |
| Gene_Symbol=ARHGDI26 26 kDa protein                                                                  |
| Gene_Symbol=ARHGDI26 Rho GDP-dissociation inhibitor 1                                                |
| Gene_Symbol=ARL3 ADP-ribosylation factor-like protein 3                                              |
| Gene_Symbol=ARMET ARMET protein precursor                                                            |
| Gene_Symbol=ARPC1B Actin-related protein 2/3 complex subunit 1B                                      |
| Gene_Symbol=ARPC4 72 kDa protein                                                                     |
| Gene_Symbol=ARSA Hypothetical protein DKFZp686G12235                                                 |
| Gene_Symbol=ARTS-1 type 1 tumor necrosis factor receptor shedding aminopeptidase regulator isoform a |
| Gene_Symbol=ASAH1 N-acylsphingosine amidohydrolase (acid ceramidase) 1 isoform b                     |
| Gene_Symbol=ASCC3L1 U5 small nuclear ribonucleoprotein 200 kDa helicase                              |
| Gene_Symbol=ASPH 26 kDa protein                                                                      |
| Gene_Symbol=ASPH Aspartyl/asparaginyl beta-hydroxylase                                               |
| Gene_Symbol=ASRGL1 asparaginase-like 1 protein                                                       |
| Gene_Symbol=ASS1 Argininosuccinate synthetase                                                        |
| Gene_Symbol=ATIC Bifunctional purine biosynthesis protein PURH                                       |
| Gene_Symbol=ATOX1 Copper transport protein ATOX1                                                     |
| Gene_Symbol=ATP1A1 Isoform Long of Sodium/potassium-transporting ATPase alpha-1 chain precursor      |
| Gene_Symbol=ATP1A2 Sodium/potassium-transporting ATPase alpha-2 chain precursor                      |
| Gene_Symbol=ATP1B3 Sodium/potassium-transporting ATPase subunit beta-3                               |
| Gene_Symbol=ATP2A2 115 kDa protein                                                                   |
| Gene_Symbol=ATP5A1 ATP synthase subunit alpha, mitochondrial precursor                               |
| Gene_Symbol=ATP5B ATP synthase subunit beta, mitochondrial precursor                                 |
| Gene_Symbol=ATP5J ATP synthase coupling factor 6, mitochondrial precursor                            |
| Gene_Symbol=ATP6AP1 53 kDa protein                                                                   |
| Gene_Symbol=ATP6AP2 Protein                                                                          |
| Gene_Symbol=ATP6AP2 Renin receptor precursor                                                         |
| Gene_Symbol=ATP6V1A Vacuolar ATP synthase catalytic subunit A, ubiquitous isoform                    |
| Gene_Symbol=ATP6V1B2 Vacuolar ATP synthase subunit B, brain isoform                                  |
| Gene_Symbol=ATP6V1G2;BAT1 BAT1 protein                                                               |
| Gene_Symbol=ATRN Isoform 1 of Attractin precursor                                                    |

|                                                                                                  |
|--------------------------------------------------------------------------------------------------|
| Gene_Symbol=AXL AXL receptor tyrosine kinase isoform 1                                           |
| Gene_Symbol=AZGP1 alpha-2-glycoprotein 1, zinc                                                   |
| Gene_Symbol=B2M Beta-2-microglobulin precursor                                                   |
| Gene_Symbol=B3GALT6 Beta-1,3-galactosyltransferase 6                                             |
| Gene_Symbol=B3GAT3 B3GAT3 protein (Fragment)                                                     |
| Gene_Symbol=B3GAT3 Galactosylgalactosylxylosylprotein 3-beta-glucuronosyltransferase 3           |
| Gene_Symbol=B3GNT1 N-acetyllactosaminide beta-1,3-N-acetylglucosaminyltransferase                |
| Gene_Symbol=B3GNT2 Isoform 2 of UDP-GlcNAc:betaGal beta-1,3-N-acetylglucosaminyltransferase 2    |
| Gene_Symbol=B4GALT1 Isoform Long of Beta-1,4-galactosyltransferase 1                             |
| Gene_Symbol=B4GALT1 Isoform Short of Beta-1,4-galactosyltransferase 1                            |
| Gene_Symbol=B4GALT3 44 kDa protein                                                               |
| Gene_Symbol=B4GALT4 Beta-1,4-galactosyltransferase 4                                             |
| Gene_Symbol=BAG2 BAG family molecular chaperone regulator 2                                      |
| Gene_Symbol=BAG3 BAG family molecular chaperone regulator 3                                      |
| Gene_Symbol=BANF1 Barrier-to-autointegration factor                                              |
| Gene_Symbol=BASP1 Brain acid soluble protein 1                                                   |
| Gene_Symbol=BAT2 Isoform 1 of Large proline-rich protein BAT2                                    |
| Gene_Symbol=BCCIP BRCA2 and CDKN1A-interacting protein isoform C                                 |
| Gene_Symbol=BCCIP Isoform 2 of BRCA2 and CDKN1A-interacting protein                              |
| Gene_Symbol=BCHE Cholinesterase precursor                                                        |
| Gene_Symbol=BCLAF1 Isoform 1 of Bcl-2-associated transcription factor 1                          |
| Gene_Symbol=BDNF Brain-derived neurotrophic factor precursor                                     |
| Gene_Symbol=BGN Biglycan precursor                                                               |
| Gene_Symbol=BID Isoform 1 of BH3-interacting domain death agonist                                |
| Gene_Symbol=BLMH Bleomycin hydrolase                                                             |
| Gene_Symbol=BLVRA Biliverdin reductase A precursor                                               |
| Gene_Symbol=BMP1 Isoform BMP1-1 of Bone morphogenetic protein 1 precursor                        |
| Gene_Symbol=BMP1 Isoform BMP1-5 of Bone morphogenetic protein 1 precursor                        |
| Gene_Symbol=BOLA2B;BOLA2 Bola-like protein 2 isoform a                                           |
| Gene_Symbol=BPNT1 Isoform 1 of 3'(2'),5'-bisphosphate nucleotidase 1                             |
| Gene_Symbol=BSG 46 kDa protein                                                                   |
| Gene_Symbol=BSG Isoform 2 of Basigin precursor                                                   |
| Gene_Symbol=BST1 ADP-ribosyl cyclase 2 precursor                                                 |
| Gene_Symbol=BTD biotinidase precursor                                                            |
| Gene_Symbol=BTF3 Isoform 2 of Transcription factor BTF3                                          |
| Gene_Symbol=BUB3 Mitotic checkpoint protein BUB3                                                 |
| Gene_Symbol=C11orf58 Small acidic protein                                                        |
| Gene_Symbol=C12orf39 Uncharacterized protein C12orf39 precursor                                  |
| Gene_Symbol=C12orf5 Uncharacterized protein C12orf5                                              |
| Gene_Symbol=C13orf8 Zinc finger protein KIAA1802                                                 |
| Gene_Symbol=C14orf141;LTBP2 Latent-transforming growth factor beta-binding protein 2 precursor   |
| Gene_Symbol=C14orf156 SRA stem-loop-interacting RNA-binding protein, mitochondrial precursor     |
| Gene_Symbol=C14orf166 CLE                                                                        |
| Gene_Symbol=C14orf166 Protein C14orf166                                                          |
| Gene_Symbol=C14orf78 similar to AHNAK nucleoprotein isoform 1                                    |
| Gene_Symbol=C19orf10 Uncharacterized protein C19orf10 precursor                                  |
| Gene_Symbol=C1QBP Complement component 1 Q subcomponent-binding protein, mitochondrial precursor |
| Gene_Symbol=C1QTNF3;AMACR Alpha-methyl-acyl-CoA racemase                                         |
| Gene_Symbol=C1R Complement C1r subcomponent precursor                                            |
| Gene_Symbol=C1RL Complement C1r-like protein                                                     |
| Gene_Symbol=C1S Complement C1s subcomponent precursor                                            |
| Gene_Symbol=C20orf77 Uncharacterized protein C20orf77                                            |

|                                                                                                       |
|-------------------------------------------------------------------------------------------------------|
| Gene_Symbol=C21orf33 Isoform Long of ES1 protein homolog, mitochondrial precursor                     |
| Gene_Symbol=C22orf28 UPF0027 protein C22orf28                                                         |
| Gene_Symbol=C3orf17 Isoform 1 of Uncharacterized protein C3orf17                                      |
| Gene_Symbol=C4orf18 Uncharacterized protein C4orf18                                                   |
| Gene_Symbol=C4orf31 hypothetical protein LOC79625                                                     |
| Gene_Symbol=C5 Complement component 5 variant (Fragment)                                              |
| Gene_Symbol=C6orf108 c-Myc-responsive protein Rcl                                                     |
| Gene_Symbol=C6orf15 Uncharacterized protein C6orf15 precursor                                         |
| Gene_Symbol=C7orf24 Uncharacterized protein C7orf24                                                   |
| Gene_Symbol=CA2 Carbonic anhydrase 2                                                                  |
| Gene_Symbol=CA6 Carbonic anhydrase 6 precursor                                                        |
| Gene_Symbol=CACYBP Isoform 1 of Calcyclin-binding protein                                             |
| Gene_Symbol=CAD CAD protein                                                                           |
| Gene_Symbol=CADM1 Nectin-like protein 2                                                               |
| Gene_Symbol=CALCA Isoform 1 of Calcitonin precursor                                                   |
| Gene_Symbol=CALD1 Isoform 4 of Caldesmon                                                              |
| Gene_Symbol=CALM3;CALM2;CALM1 Calmodulin                                                              |
| Gene_Symbol=CALR Calreticulin precursor                                                               |
| Gene_Symbol=CALU Calumenin precursor                                                                  |
| Gene_Symbol=CALU Isoform 1 of Calumenin precursor                                                     |
| Gene_Symbol=CAMK2D Isoform Delta 6 of Calcium/calmodulin-dependent protein kinase type II delta chain |
| Gene_Symbol=CAND1 Isoform 1 of Cullin-associated NEDD8-dissociated protein 1                          |
| Gene_Symbol=CANT1 Isoform 1 of Soluble calcium-activated nucleotidase 1                               |
| Gene_Symbol=CANX Calnexin precursor                                                                   |
| Gene_Symbol=CAP1 Adenylyl cyclase-associated protein 1                                                |
| Gene_Symbol=CAPN1 Calpain-1 catalytic subunit                                                         |
| Gene_Symbol=CAPZA1 F-actin capping protein subunit alpha-1                                            |
| Gene_Symbol=CAPZA2 F-actin capping protein subunit alpha-2                                            |
| Gene_Symbol=CAPZB Capping protein (Actin filament) muscle Z-line, beta                                |
| Gene_Symbol=CAPZB Isoform 1 of F-actin capping protein subunit beta                                   |
| Gene_Symbol=CARHSP1 Calcium-regulated heat stable protein 1                                           |
| Gene_Symbol=CARS cysteinyl-tRNA synthetase isoform c                                                  |
| Gene_Symbol=CAST calpastatin isoform e                                                                |
| Gene_Symbol=CAST Isoform 2 of Calpastatin                                                             |
| Gene_Symbol=CBFB Core-binding factor subunit beta                                                     |
| Gene_Symbol=CBR1 Carbonyl reductase [NADPH] 1                                                         |
| Gene_Symbol=CBX1 Chromobox protein homolog 1                                                          |
| Gene_Symbol=CBX3;LOC653972 Chromobox protein homolog 3                                                |
| Gene_Symbol=CBX5 Chromobox protein homolog 5                                                          |
| Gene_Symbol=CCAR1 Cell division cycle and apoptosis regulator protein 1                               |
| Gene_Symbol=CCDC25 CCDC25 protein                                                                     |
| Gene_Symbol=CCDC80 steroid-sensitive protein 1                                                        |
| Gene_Symbol=CCL2 Small inducible cytokine A2 precursor                                                |
| Gene_Symbol=CCT2 T-complex protein 1 subunit beta                                                     |
| Gene_Symbol=CCT3 chaperonin containing TCP1, subunit 3 isoform b                                      |
| Gene_Symbol=CCT4 T-complex protein 1 subunit delta                                                    |
| Gene_Symbol=CCT5 T-complex protein 1 subunit epsilon                                                  |
| Gene_Symbol=CCT6A T-complex protein 1 subunit zeta                                                    |
| Gene_Symbol=CCT7 T-complex protein 1 subunit eta                                                      |
| Gene_Symbol=CCT8 Chaperonin containing TCP1, subunit 8 (Theta) variant                                |
| Gene_Symbol=CD109 Isoform 1 of CD109 antigen precursor                                                |
| Gene_Symbol=CD14 Monocyte differentiation antigen CD14 precursor                                      |
| Gene_Symbol=CD276 Isoform 1 of CD276 antigen precursor                                                |

|                                                                                         |
|-----------------------------------------------------------------------------------------|
| Gene_Symbol=CD3EAP Isoform 2 of RNA polymerase I-associated factor PAF49                |
| Gene_Symbol=CD44 Isoform 12 of CD44 antigen precursor                                   |
| Gene_Symbol=CD44 Isoform 4 of CD44 antigen precursor                                    |
| Gene_Symbol=CD44 Isoform CD44 of CD44 antigen precursor                                 |
| Gene_Symbol=CD46 CD46 antigen, complement regulatory protein isoform 13 precursor       |
| Gene_Symbol=CD55 Isoform 1 of Complement decay-accelerating factor precursor            |
| Gene_Symbol=CD70 Tumor necrosis factor ligand superfamily member 7                      |
| Gene_Symbol=CD81 CD81 antigen                                                           |
| Gene_Symbol=CD9 CD9 antigen                                                             |
| Gene_Symbol=CDC37 Hsp90 co-chaperone Cdc37                                              |
| Gene_Symbol=CDC42 Isoform 1 of Cell division control protein 42 homolog precursor       |
| Gene_Symbol=CDC5L Cell division cycle 5-like protein                                    |
| Gene_Symbol=CDH1 Epithelial-cadherin precursor                                          |
| Gene_Symbol=CDH10 Cadherin-10 precursor                                                 |
| Gene_Symbol=CDH11 Isoform 2 of Cadherin-11 precursor                                    |
| Gene_Symbol=CDH13 Cadherin-13 precursor                                                 |
| Gene_Symbol=CDH17 Cadherin-17 precursor                                                 |
| Gene_Symbol=CDH2 Cadherin-2 precursor                                                   |
| Gene_Symbol=CDH3 Cadherin-3 precursor                                                   |
| Gene_Symbol=CDH3 CDH3 protein                                                           |
| Gene_Symbol=CDV3 Protein CDV3 homolog                                                   |
| Gene_Symbol=CEACAM5 Carcinoembryonic antigen-related cell adhesion molecule 5 precursor |
| Gene_Symbol=CEL Carboxyl ester lipase                                                   |
| Gene_Symbol=CES1 Isoform 2 of Liver carboxylesterase 1 precursor                        |
| Gene_Symbol=CFD complement factor D preproprotein                                       |
| Gene_Symbol=CFDP1 Isoform 1 of Craniofacial development protein 1                       |
| Gene_Symbol=CFH Isoform 1 of Complement factor H precursor                              |
| Gene_Symbol=CFHR3 Complement factor H-related 3                                         |
| Gene_Symbol=CFL1 Cofilin-1                                                              |
| Gene_Symbol=CGREF1 Cell growth regulator with EF hand domain protein 1                  |
| Gene_Symbol=CHERP calcium homeostasis endoplasmic reticulum protein                     |
| Gene_Symbol=CHGA chromogranin A precursor                                               |
| Gene_Symbol=CHGB Secretogranin-1 precursor                                              |
| Gene_Symbol=ChGn Isoform 1 of Chondroitin beta-1,4-N-acetylgalactosaminyltransferase 1  |
| Gene_Symbol=CHID1 Isoform 2 of Chitinase domain-containing protein 1 precursor          |
| Gene_Symbol=CHL1 Isoform 1 of Neural cell adhesion molecule L1-like protein precursor   |
| Gene_Symbol=CHL1 Isoform 2 of Neural cell adhesion molecule L1-like protein precursor   |
| Gene_Symbol=CHORDC1 Cysteine and histidine-rich domain-containing protein 1             |
| Gene_Symbol=CHPF Chondroitin sulfate synthase 2                                         |
| Gene_Symbol=CHRDL1 Ventroptin (Fragment)                                                |
| Gene_Symbol=CHST11 Isoform 1 of Carbohydrate sulfotransferase 11                        |
| Gene_Symbol=CIAPIN1 Isoform 3 of Anamorsin                                              |
| Gene_Symbol=CILP2 Similar to Cartilage intermediate layer protein                       |
| Gene_Symbol=CIRBP 32 kDa protein                                                        |
| Gene_Symbol=CKB Creatine kinase B-type                                                  |
| Gene_Symbol=CKMT1B;CKMT1A Creatine kinase, ubiquitous mitochondrial precursor           |
| Gene_Symbol=CLEC11A C-type lectin domain family 11 member A precursor                   |
| Gene_Symbol=CLIC1 Chloride intracellular channel protein 1                              |
| Gene_Symbol=CLIC4 Chloride intracellular channel protein 4                              |
| Gene_Symbol=CLINT1 Isoform 1 of Clathrin interactor 1                                   |
| Gene_Symbol=CLIP1 CLIP1 protein                                                         |
| Gene_Symbol=CLSTN1 calsyntenin 1 isoform 2                                              |
| Gene_Symbol=CLSTN1 Calsyntenin-1 precursor                                              |

|                                                                                               |
|-----------------------------------------------------------------------------------------------|
| Gene_Symbol=CLSTN2 Calsyntenin-2 precursor                                                    |
| Gene_Symbol=CLSTN3 Alcadein beta                                                              |
| Gene_Symbol=CLSTN3 Calsyntenin-3 precursor                                                    |
| Gene_Symbol=CLTC Isoform 1 of Clathrin heavy chain 1                                          |
| Gene_Symbol=CLTC Isoform 2 of Clathrin heavy chain 1                                          |
| Gene_Symbol=CLU Clusterin precursor                                                           |
| Gene_Symbol=CMPK cytidylate kinase                                                            |
| Gene_Symbol=CNBP Isoform 2 of Cellular nucleic acid-binding protein                           |
| Gene_Symbol=CNBP Zinc finger protein 9                                                        |
| Gene_Symbol=CNDP2 Cytosolic nonspecific dipeptidase                                           |
| Gene_Symbol=CNN2 Calponin-2                                                                   |
| Gene_Symbol=CNN3 Calponin-3                                                                   |
| Gene_Symbol=CNTN1 Isoform 1 of Contactin-1 precursor                                          |
| Gene_Symbol=COCH Cochlin precursor                                                            |
| Gene_Symbol=COL12A1 316 kDa protein                                                           |
| Gene_Symbol=COL12A1 Isoform Long of Collagen alpha-1(XII) chain precursor                     |
| Gene_Symbol=COL18A1 alpha 1 type XVIII collagen isoform 1 precursor                           |
| Gene_Symbol=COL4A1 Collagen alpha-1(IV) chain precursor                                       |
| Gene_Symbol=COL4A2 Collagen alpha-2(IV) chain precursor                                       |
| Gene_Symbol=COL4A6 Isoform B of Collagen alpha-6(IV) chain precursor                          |
| Gene_Symbol=COL5A1 Collagen alpha-1(V) chain precursor                                        |
| Gene_Symbol=COL5A2 alpha 2 type V collagen preproprotein                                      |
| Gene_Symbol=COL6A1 Collagen alpha-1(VI) chain precursor                                       |
| Gene_Symbol=COL6A2 Isoform 2C2A of Collagen alpha-2(VI) chain precursor                       |
| Gene_Symbol=COL8A1 Cell proliferation-inducing protein 41                                     |
| Gene_Symbol=COPA Coatomer subunit alpha                                                       |
| Gene_Symbol=COPB1 Coatomer subunit beta                                                       |
| Gene_Symbol=COPB2 Coatomer subunit beta'                                                      |
| Gene_Symbol=COPE epsilon subunit of coatomer protein complex isoform b                        |
| Gene_Symbol=COPG 98 kDa protein                                                               |
| Gene_Symbol=CORO1B;PTPRCAP Coronin-1B                                                         |
| Gene_Symbol=CORO1C Coronin-1C                                                                 |
| Gene_Symbol=COTL1 Coactosin-like protein                                                      |
| Gene_Symbol=COX5A Cytochrome c oxidase subunit 5A, mitochondrial precursor                    |
| Gene_Symbol=COX6B1 Cytochrome c oxidase subunit VIb isoform 1                                 |
| Gene_Symbol=CPD Carboxypeptidase D precursor                                                  |
| Gene_Symbol=CPE Carboxypeptidase E precursor                                                  |
| Gene_Symbol=CPNE1 59 kDa protein                                                              |
| Gene_Symbol=CPNE1;RBM12 RNA-binding protein 12                                                |
| Gene_Symbol=CPNE3 Copine-3                                                                    |
| Gene_Symbol=CPS1 Isoform 1 of Carbamoyl-phosphate synthase [ammonia], mitochondrial precursor |
| Gene_Symbol=CPSF1 Cleavage and polyadenylation specificity factor subunit 1                   |
| Gene_Symbol=CPSF2 Cleavage and polyadenylation specificity factor subunit 2                   |
| Gene_Symbol=CPSF6 Isoform 1 of Cleavage and polyadenylation specificity factor 6              |
| Gene_Symbol=CPSF6 Isoform 2 of Cleavage and polyadenylation specificity factor 6              |
| Gene_Symbol=CPVL Probable serine carboxypeptidase CPVL precursor                              |
| Gene_Symbol=CRAMP1L;HN1L Isoform 1 of Hematological and neurological expressed 1-like protein |
| Gene_Symbol=CREG1 Protein CREG1 precursor                                                     |
| Gene_Symbol=CRH Corticoliberin precursor                                                      |
| Gene_Symbol=CRIM1 Cysteine-rich motor neuron 1 protein precursor                              |
| Gene_Symbol=CRIP2 Cysteine-rich protein 2                                                     |
| Gene_Symbol=CRISPLD1 Cysteine-rich secretory protein LCCL domain-containing 1 precursor       |

|                                                                                             |
|---------------------------------------------------------------------------------------------|
| Gene_Symbol=CRK Isoform Crk-II of Proto-oncogene C-crk                                      |
| Gene_Symbol=CRK v-crk sarcoma virus CT10 oncogene homolog isoform b                         |
| Gene_Symbol=CRKL Crk-like protein                                                           |
| Gene_Symbol=CRLF1 Cytokine receptor-like factor 1 precursor                                 |
| Gene_Symbol=CRTAP Cartilage-associated protein precursor                                    |
| Gene_Symbol=CRYZ Quinone oxidoreductase                                                     |
| Gene_Symbol=CS Citrate synthase, mitochondrial precursor                                    |
| Gene_Symbol=CSDA Isoform 1 of DNA-binding protein A                                         |
| Gene_Symbol=CSDE1 Hypothetical protein DKFZp779B0247                                        |
| Gene_Symbol=CSE1L Isoform 1 of Exportin-2                                                   |
| Gene_Symbol=CSF1 Isoform 1 of Macrophage colony-stimulating factor 1 precursor              |
| Gene_Symbol=CSNK2A1 Casein kinase 2 alpha isoform                                           |
| Gene_Symbol=CSRP1 Cysteine and glycine-rich protein 1                                       |
| Gene_Symbol=CST1 Cystatin-SN precursor                                                      |
| Gene_Symbol=CST3 Cystatin-C precursor                                                       |
| Gene_Symbol=CSTB Cystatin-B                                                                 |
| Gene_Symbol=CSTF1 Cleavage stimulation factor 50 kDa subunit                                |
| Gene_Symbol=CSTF2 Isoform 1 of Cleavage stimulation factor 64 kDa subunit                   |
| Gene_Symbol=CTAGE5 Isoform MEA6 of Cutaneous T-cell lymphoma-associated antigen 5           |
| Gene_Symbol=CTBS Di-N-acetylchitobiase precursor                                            |
| Gene_Symbol=CTGF Isoform 1 of Connective tissue growth factor precursor                     |
| Gene_Symbol=CTHRC1 Isoform 1 of Collagen triple helix repeat-containing protein 1 precursor |
| Gene_Symbol=CTNNA1 Isoform 1 of Catenin alpha-1                                             |
| Gene_Symbol=CTNNB1 Isoform 1 of Catenin beta-1                                              |
| Gene_Symbol=CTNNB1 similar to Beta-catenin                                                  |
| Gene_Symbol=CTNND1 Isoform 1AB of Catenin delta-1                                           |
| Gene_Symbol=CTPS CTP synthase 1                                                             |
| Gene_Symbol=CTPS2 CTP synthase 2                                                            |
| Gene_Symbol=CTSA 62 kDa protein                                                             |
| Gene_Symbol=CTSA cathepsin A precursor                                                      |
| Gene_Symbol=CTSB Cathepsin B precursor                                                      |
| Gene_Symbol=CTSC Dipeptidyl-peptidase 1 precursor                                           |
| Gene_Symbol=CTSD Cathepsin D precursor                                                      |
| Gene_Symbol=CTSL1 Cathepsin L precursor                                                     |
| Gene_Symbol=CTSL2 Cathepsin L2 precursor                                                    |
| Gene_Symbol=CTSZ Cathepsin Z precursor                                                      |
| Gene_Symbol=CTTN Src substrate cortactin                                                    |
| Gene_Symbol=CUL3 Isoform 1 of Cullin-3                                                      |
| Gene_Symbol=CUITA Isoform A of Protein CutA precursor                                       |
| Gene_Symbol=CXCL1 Growth-regulated protein alpha precursor                                  |
| Gene_Symbol=CXCL14 small inducible cytokine B14 precursor                                   |
| Gene_Symbol=CXCL5 Small inducible cytokine B5 precursor                                     |
| Gene_Symbol=CYB5B cytochrome b5 outer mitochondrial membrane precursor                      |
| Gene_Symbol=CYCS Cytochrome c                                                               |
| Gene_Symbol=CYFIP1 145 kDa protein                                                          |
| Gene_Symbol=CYFIP1 Isoform 1 of Cytoplasmic FMR1-interacting protein 1                      |
| Gene_Symbol=CYR61 CYR61 protein                                                             |
| Gene_Symbol=CYR61 Protein CYR61 precursor                                                   |
| Gene_Symbol=D4ST1 Carbohydrate sulfotransferase D4ST1                                       |
| Gene_Symbol=DAG1 Dystroglycan precursor                                                     |
| Gene_Symbol=DARS Aspartyl-tRNA synthetase, cytoplasmic                                      |
| Gene_Symbol=DAZAP1 Isoform 1 of DAZ-associated protein 1                                    |
| Gene_Symbol=DBI Isoform a 1 of Acyl-CoA-binding protein                                     |



|                                                                                           |
|-------------------------------------------------------------------------------------------|
| Gene_Symbol=DBN1 Drebrin                                                                  |
| Gene_Symbol=DBN1 drebrin 1 isoform b                                                      |
| Gene_Symbol=DCI Isoform 1 of 3,2-trans-enoyl-CoA isomerase, mitochondrial precursor       |
| Gene_Symbol=DCTN2 dynactin 2                                                              |
| Gene_Symbol=DDAH1 NG,NG-dimethylarginine dimethylaminohydrolase 1                         |
| Gene_Symbol=DDB1 damage-specific DNA binding protein 1                                    |
| Gene_Symbol=DDB1 DNA damage-binding protein 1                                             |
| Gene_Symbol=DDC Aromatic-L-amino-acid decarboxylase                                       |
| Gene_Symbol=DDR1 Isoform 1 of Epithelial discoidin domain-containing receptor 1 precursor |
| Gene_Symbol=DDT D-dopachrome decarboxylase                                                |
| Gene_Symbol=DDX1 ATP-dependent RNA helicase DDX1                                          |
| Gene_Symbol=DDX17 Isoform 1 of Probable ATP-dependent RNA helicase DDX17                  |
| Gene_Symbol=DDX17 Isoform 3 of Probable ATP-dependent RNA helicase DDX17                  |
| Gene_Symbol=DDX19A ATP-dependent RNA helicase DDX19A                                      |
| Gene_Symbol=DDX21 Isoform 1 of Nucleolar RNA helicase 2                                   |
| Gene_Symbol=DDX39 ATP-dependent RNA helicase DDX39                                        |
| Gene_Symbol=DDX3X ATP-dependent RNA helicase DDX3X                                        |
| Gene_Symbol=DDX42 Isoform 1 of ATP-dependent RNA helicase DDX42                           |
| Gene_Symbol=DDX42 Isoform 2 of ATP-dependent RNA helicase DDX42                           |
| Gene_Symbol=DDX46 Probable ATP-dependent RNA helicase DDX46                               |
| Gene_Symbol=DDX5 Probable ATP-dependent RNA helicase DDX5                                 |
| Gene_Symbol=DECR1 2,4-dienoyl-CoA reductase, mitochondrial precursor                      |
| Gene_Symbol=DEK Protein DEK                                                               |
| Gene_Symbol=DENR Density-regulated protein                                                |
| Gene_Symbol=DFFA Isoform DFF45 of DNA fragmentation factor subunit alpha (Fragment)       |
| Gene_Symbol=DHX15 DEAH (Asp-Glu-Ala-His) box polypeptide 15                               |
| Gene_Symbol=DHX9 ATP-dependent RNA helicase A                                             |
| Gene_Symbol=DIDO1 Isoform 4 of Death-inducer obliterator 1                                |
| Gene_Symbol=DKC1 H/ACA ribonucleoprotein complex subunit 4                                |
| Gene_Symbol=DKFZp686D0972 hypothetical protein LOC345651                                  |
| Gene_Symbol=DKFZp686O24166 Hypothetical protein DKFZp686I21167                            |
| Gene_Symbol=DKK1 Dickkopf-related protein 1 precursor                                     |
| Gene_Symbol=DLD Dihydrolipoyl dehydrogenase, mitochondrial precursor                      |
| Gene_Symbol=DLG1 Isoform 1 of Disks large homolog 1                                       |
| Gene_Symbol=DNAJA1 DnaJ homolog subfamily A member 1                                      |
| Gene_Symbol=DNAJA2 DnaJ homolog subfamily A member 2                                      |
| Gene_Symbol=DNAJB1 DnaJ homolog subfamily B member 1                                      |
| Gene_Symbol=DNAJB11 DnaJ homolog subfamily B member 11 precursor                          |
| Gene_Symbol=DNAJB6 Isoform A of DnaJ homolog subfamily B member 6                         |
| Gene_Symbol=DNAJC10 DnaJ homolog subfamily C member 10                                    |
| Gene_Symbol=DNAJC3 Isoform 1 of DnaJ homolog subfamily C member 3                         |
| Gene_Symbol=DNAJC8 DnaJ homolog subfamily C member 8                                      |
| Gene_Symbol=DNASE2 Deoxyribonuclease-2-alpha precursor                                    |
| Gene_Symbol=DNER Delta and Notch-like epidermal growth factor-related receptor precursor  |
| Gene_Symbol=DNM1L Isoform 1 of Dynamin-1-like protein                                     |
| Gene_Symbol=DNM1L Isoform 4 of Dynamin-1-like protein                                     |
| Gene_Symbol=DNM1L Isoform 5 of Dynamin-1-like protein                                     |
| Gene_Symbol=DNM2 Isoform 1 of Dynamin-2                                                   |
| Gene_Symbol=DNPEP Hypothetical protein DNPEP                                              |
| Gene_Symbol=DOHH Deoxyhypusine hydroxylase                                                |
| Gene_Symbol=DPP3;BBS1 Isoform 1 of Dipeptidyl-peptidase 3                                 |
| Gene_Symbol=DPYSL2 Dihydropyrimidinase-related protein 2                                  |

|                                                                                                            |
|------------------------------------------------------------------------------------------------------------|
| Gene_Symbol=DPYSL3 DPYSL3 protein                                                                          |
| Gene_Symbol=DSC2 Isoform 2A of Desmocollin-2 precursor                                                     |
| Gene_Symbol=DSG2 desmoglein 2 preproprotein                                                                |
| Gene_Symbol=DSP Isoform DPI of Desmoplakin                                                                 |
| Gene_Symbol=DSTN Dextrin                                                                                   |
| Gene_Symbol=DSTN dextrin isoform b                                                                         |
| Gene_Symbol=DUT 24 kDa protein                                                                             |
| Gene_Symbol=DUT dUTP pyrophosphatase isoform 1 precursor                                                   |
| Gene_Symbol=DUT Isoform DUT-M of Deoxyuridine 5'-triphosphate nucleotidohydrolase, mitochondrial precursor |
| Gene_Symbol=DYNC1H1 532 kDa protein                                                                        |
| Gene_Symbol=DYNC1H1 Dynein heavy chain, cytosolic                                                          |
| Gene_Symbol=DYNC1I2 Isoform 2E of Cytoplasmic dynein 1 intermediate chain 2                                |
| Gene_Symbol=DYNLL1 Dynein light chain 1, cytoplasmic                                                       |
| Gene_Symbol=EBNA1BP2 EBNA1 binding protein 2                                                               |
| Gene_Symbol=ECH1 Delta(3,5)-Delta(2,4)-dienoyl-CoA isomerase, mitochondrial precursor                      |
| Gene_Symbol=ECHS1 Enoyl-CoA hydratase, mitochondrial precursor                                             |
| Gene_Symbol=ECM1 Extracellular matrix protein 1 precursor                                                  |
| Gene_Symbol=EDIL3 Isoform 1 of EGF-like repeat and discoidin I-like domain-containing protein 3 precursor  |
| Gene_Symbol=EEF1A1 Elongation factor 1-alpha 1                                                             |
| Gene_Symbol=EEF1A2 Elongation factor 1-alpha 2                                                             |
| Gene_Symbol=EEF1B2 Elongation factor 1-beta                                                                |
| Gene_Symbol=EEF1D EEF1D protein                                                                            |
| Gene_Symbol=EEF1D eukaryotic translation elongation factor 1 delta isoform 1                               |
| Gene_Symbol=EEF1E1 Eukaryotic translation elongation factor 1 epsilon-1                                    |
| Gene_Symbol=EEF1G Elongation factor 1-gamma                                                                |
| Gene_Symbol=EEF2 Elongation factor 2                                                                       |
| Gene_Symbol=EFEMP1 Isoform 1 of EGF-containing fibulin-like extracellular matrix protein 1 precursor       |
| Gene_Symbol=EFHD2 EF-hand domain-containing protein 2                                                      |
| Gene_Symbol=EFNA1 Isoform 1 of Ephrin-A1 precursor                                                         |
| Gene_Symbol=EFNA5 Ephrin-A5 precursor                                                                      |
| Gene_Symbol=EFNB1 Ephrin-B1 precursor                                                                      |
| Gene_Symbol=EFTUD2 116 kDa U5 small nuclear ribonucleoprotein component                                    |
| Gene_Symbol=EGFL9 Isoform 1 of EGF-like domain-containing protein 9 precursor                              |
| Gene_Symbol=EHD4 EH domain-containing protein 4                                                            |
| Gene_Symbol=EIF1 Eukaryotic translation initiation factor 1                                                |
| Gene_Symbol=EIF2S1 Eukaryotic translation initiation factor 2 subunit 1                                    |
| Gene_Symbol=EIF2S2 Eukaryotic translation initiation factor 2 subunit 2                                    |
| Gene_Symbol=EIF2S3 Eukaryotic translation initiation factor 2 subunit 3                                    |
| Gene_Symbol=EIF3S1 Eukaryotic translation initiation factor 3 subunit 1                                    |
| Gene_Symbol=EIF3S12 Eukaryotic translation initiation factor 3 subunit 12                                  |
| Gene_Symbol=EIF3S2 Eukaryotic translation initiation factor 3 subunit 2                                    |
| Gene_Symbol=EIF3S3 Eukaryotic translation initiation factor 3 subunit 3                                    |
| Gene_Symbol=EIF3S4 Eukaryotic translation initiation factor 3 subunit 4                                    |
| Gene_Symbol=EIF3S5 Eukaryotic translation initiation factor 3 subunit 5                                    |
| Gene_Symbol=EIF3S6 Eukaryotic translation initiation factor 3 subunit 6                                    |
| Gene_Symbol=EIF3S6IP DJ1014D13.1 protein                                                                   |
| Gene_Symbol=EIF3S8 Eukaryotic translation initiation factor 3 subunit 8                                    |
| Gene_Symbol=EIF3S9 99 kDa protein                                                                          |
| Gene_Symbol=EIF4A1 Eukaryotic initiation factor 4A-I                                                       |
| Gene_Symbol=EIF4A2 Isoform 1 of Eukaryotic initiation factor 4A-II                                         |
| Gene_Symbol=EIF4B Eukaryotic translation initiation factor 4B                                              |
| Gene_Symbol=EIF4E Eukaryotic translation initiation factor 4E                                              |
| Gene_Symbol=EIF4E Similar to Eukaryotic translation initiation factor 4E                                   |

|                                                                                                           |
|-----------------------------------------------------------------------------------------------------------|
| Gene_Symbol=EIF4G1 EIF4G1 variant protein (Fragment)                                                      |
| Gene_Symbol=EIF4G1 Isoform E of Eukaryotic translation initiation factor 4 gamma 1                        |
| Gene_Symbol=EIF4G2 Eukaryotic translation initiation factor 4 gamma 2                                     |
| Gene_Symbol=EIF5 Eukaryotic translation initiation factor 5                                               |
| Gene_Symbol=EIF5A Isoform 1 of Eukaryotic translation initiation factor 5A-1                              |
| Gene_Symbol=EIF5A Isoform 2 of Eukaryotic translation initiation factor 5A-1                              |
| Gene_Symbol=EIF5B Eukaryotic translation initiation factor 5B                                             |
| Gene_Symbol=ELAVL1 ELAV-like protein 1                                                                    |
| Gene_Symbol=EML4 Echinoderm microtubule-associated protein-like 4                                         |
| Gene_Symbol=ENAH Isoform 2 of Protein enabled homolog                                                     |
| Gene_Symbol=ENO1 Isoform alpha-enolase of Alpha-enolase                                                   |
| Gene_Symbol=ENO2 Gamma-enolase                                                                            |
| Gene_Symbol=ENOPH1 Isoform 1 of Enolase-phosphatase E1                                                    |
| Gene_Symbol=ENPP2 Isoform 1 of Ectonucleotide pyrophosphatase/phosphodiesterase family member 2 precursor |
| Gene_Symbol=ENSA Hypothetical protein DKFZp779B2258                                                       |
| Gene_Symbol=ENSA Isoform 2 of Alpha-endosulfine                                                           |
| Gene_Symbol=ENTPD6 Ectonucleoside triphosphate diphosphohydrolase 6                                       |
| Gene_Symbol=EPB41L3 Isoform A of Band 4.1-like protein 3                                                  |
| Gene_Symbol=EPHA2 ephrin receptor EphA2                                                                   |
| Gene_Symbol=EPHA4 Ephrin type-A receptor 4 precursor                                                      |
| Gene_Symbol=EPHA5 Isoform 1 of Ephrin type-A receptor 5 precursor                                         |
| Gene_Symbol=EPHX1 Epoxide hydrolase 1                                                                     |
| Gene_Symbol=EPRS glutamyl-prolyl tRNA synthetase                                                          |
| Gene_Symbol=EPS15L1 Epidermal growth factor receptor substrate 15-like 1                                  |
| Gene_Symbol=ERH Enhancer of rudimentary homolog                                                           |
| Gene_Symbol=ERO1L ERO1-like protein alpha precursor                                                       |
| Gene_Symbol=ERP29 Endoplasmic reticulum protein ERp29 precursor                                           |
| Gene_Symbol=ESD S-formylglutathione hydrolase                                                             |
| Gene_Symbol=ESM1 Endothelial cell-specific molecule 1 precursor                                           |
| Gene_Symbol=EWSR1 CDNA FLJ31747 fis, clone NT2RI2007377, highly similar to RNA-BINDING PROTEIN EWS        |
| Gene_Symbol=EXT1 Exostosin-1                                                                              |
| Gene_Symbol=EXT2 Isoform 1 of Exostosin-2                                                                 |
| Gene_Symbol=EXTL2 EXTL2 protein (Fragment)                                                                |
| Gene_Symbol=F10 Coagulation factor X precursor                                                            |
| Gene_Symbol=F11R Isoform 1 of Putative thiosulfate sulfurtransferase KAT                                  |
| Gene_Symbol=F11R Junctional adhesion molecule A precursor                                                 |
| Gene_Symbol=F5 Coagulation factor V                                                                       |
| Gene_Symbol=FAM10A4 Protein FAM10A4                                                                       |
| Gene_Symbol=FAM129B Niban-like protein                                                                    |
| Gene_Symbol=FAM20B Protein FAM20B precursor                                                               |
| Gene_Symbol=FAM3B 28 kDa protein                                                                          |
| Gene_Symbol=FAM3C Protein FAM3C precursor                                                                 |
| Gene_Symbol=FAM49B Protein FAM49B                                                                         |
| Gene_Symbol=FAM50A Protein FAM50A                                                                         |
| Gene_Symbol=FARSA Phenylalanyl-tRNA synthetase alpha chain                                                |
| Gene_Symbol=FARSB Phenylalanyl-tRNA synthetase beta chain                                                 |
| Gene_Symbol=FASN fatty acid synthase                                                                      |
| Gene_Symbol=FAT Cadherin-related tumor suppressor homolog precursor                                       |
| Gene_Symbol=FBL rRNA 2'-O-methyltransferase fibrillar                                                     |
| Gene_Symbol=FBLN1 Isoform C of Fibulin-1 precursor                                                        |
| Gene_Symbol=FBLN1 Isoform D of Fibulin-1 precursor                                                        |
| Gene_Symbol=FBLN2 fibulin 2 precursor, isoform a                                                          |
| Gene_Symbol=FBLN2 Fibulin-2 precursor                                                                     |

|                                                                                       |
|---------------------------------------------------------------------------------------|
| Gene_Symbol=FBN1 312 kDa protein                                                      |
| Gene_Symbol=FBN1 Fibrillin-1 precursor                                                |
| Gene_Symbol=FBN2 fibrillin 2 precursor                                                |
| Gene_Symbol=FDPS Farnesyl diphosphate synthase                                        |
| Gene_Symbol=FEN1 Flap endonuclease 1                                                  |
| Gene_Symbol=FER1L3 Isoform 1 of Myoferlin                                             |
| Gene_Symbol=FGF19 Fibroblast growth factor 19 precursor                               |
| Gene_Symbol=FGFBP1 Fibroblast growth factor-binding protein 1 precursor               |
| Gene_Symbol=FGFR1 Isoform 14 of Basic fibroblast growth factor receptor 1 precursor   |
| Gene_Symbol=FGFRL1 Fibroblast growth factor receptor-like 1 precursor                 |
| Gene_Symbol=FH Isoform Mitochondrial of Fumarate hydratase, mitochondrial precursor   |
| Gene_Symbol=FHL1 Four and a half LIM domains 1 variant                                |
| Gene_Symbol=FHL2 FHL2 isoform 5                                                       |
| Gene_Symbol=FIP1L1 Isoform 1 of Pre-mRNA 3'-end-processing factor FIP1                |
| Gene_Symbol=FIP1L1 Isoform 3 of Pre-mRNA 3'-end-processing factor FIP1                |
| Gene_Symbol=FKBP10 FK506-binding protein 10 precursor                                 |
| Gene_Symbol=FKBP1A FKBP1A protein                                                     |
| Gene_Symbol=FKBP3 FK506-binding protein 3                                             |
| Gene_Symbol=FKBP4 FK506-binding protein 4                                             |
| Gene_Symbol=FLJ10292 Protein mago nashi homolog 2                                     |
| Gene_Symbol=FLJ11151 Hypothetical protein FLJ11151                                    |
| Gene_Symbol=FLJ12684 hypothetical protein LOC79584                                    |
| Gene_Symbol=FLJ21908 CDNA: FLJ21908 fis, clone HEP03830                               |
| Gene_Symbol=FLJ37440 Hypothetical protein FLJ37440                                    |
| Gene_Symbol=FLNA filamin A, alpha                                                     |
| Gene_Symbol=FLNA Filamin-A                                                            |
| Gene_Symbol=FLNB 278 kDa protein                                                      |
| Gene_Symbol=FLNB Isoform 1 of Filamin-B                                               |
| Gene_Symbol=FLNC Gamma filamin variant                                                |
| Gene_Symbol=FMR1 Isoform 1 of Fragile X mental retardation 1 protein                  |
| Gene_Symbol=FN1 fibronectin 1 isoform 2 preproprotein                                 |
| Gene_Symbol=FN1 Hypothetical protein DKFZp686K08164                                   |
| Gene_Symbol=FN1 Isoform 1 of Fibronectin precursor                                    |
| Gene_Symbol=FNBP1L Isoform 3 of Formin-binding protein 1-like                         |
| Gene_Symbol=FRAS1 Isoform 2 of Extracellular matrix protein FRAS1 precursor           |
| Gene_Symbol=FREM2 Isoform 1 of FRAS1-related extracellular matrix protein 2 precursor |
| Gene_Symbol=FSCN1 Fascin                                                              |
| Gene_Symbol=FST Isoform 1 of Follistatin precursor                                    |
| Gene_Symbol=FSTL1 Follistatin-related protein 1 precursor                             |
| Gene_Symbol=FSTL3 Follistatin-related protein 3 precursor                             |
| Gene_Symbol=FSTL4 Isoform 1 of Follistatin-related protein 4 precursor                |
| Gene_Symbol=FSTL4 Isoform 2 of Follistatin-related protein 4 precursor                |
| Gene_Symbol=FSTL5 Follistatin-related protein 5 precursor                             |
| Gene_Symbol=FUBP1 Isoform 1 of Far upstream element-binding protein 1                 |
| Gene_Symbol=FUBP1 Isoform 2 of Far upstream element-binding protein 1                 |
| Gene_Symbol=FUCA1 fucosidase, alpha-L-1, tissue                                       |
| Gene_Symbol=FUCA2 Plasma alpha-L-fucosidase precursor                                 |
| Gene_Symbol=FURIN Furin precursor                                                     |
| Gene_Symbol=FUS Fus-like protein (Fragment)                                           |
| Gene_Symbol=FUSIP1 FUS interacting protein (Serine/arginine-rich) 1                   |
| Gene_Symbol=FUSIP1 Isoform 2 of FUS-interacting serine-arginine-rich protein 1        |
| Gene_Symbol=FXR1 Isoform 1 of Fragile X mental retardation syndrome-related protein 1 |

|                                                                                                                               |
|-------------------------------------------------------------------------------------------------------------------------------|
| Gene_Symbol=FXR1 Isoform 2 of Fragile X mental retardation syndrome-related protein 1                                         |
| Gene_Symbol=G3BP1 Ras GTPase-activating protein-binding protein 1                                                             |
| Gene_Symbol=G3BP2 Isoform A of Ras GTPase-activating protein-binding protein 2                                                |
| Gene_Symbol=G6PD glucose-6-phosphate dehydrogenase isoform a                                                                  |
| Gene_Symbol=G6PD Isoform Long of Glucose-6-phosphate 1-dehydrogenase                                                          |
| Gene_Symbol=GAA 106 kDa protein                                                                                               |
| Gene_Symbol=GAA Lysosomal alpha-glucosidase precursor                                                                         |
| Gene_Symbol=GAK Cyclin G-associated kinase                                                                                    |
| Gene_Symbol=GAL Galanin precursor                                                                                             |
| Gene_Symbol=GALC galactosylceramidase isoform a precursor                                                                     |
| Gene_Symbol=GALNAC4S-6ST Isoform 1 of N-acetylgalactosamine 4-sulfate 6-O-sulfotransferase                                    |
| Gene_Symbol=GALNS N-acetylgalactosamine-6-sulfatase precursor                                                                 |
| Gene_Symbol=GALNT10 Isoform 1 of Polypeptide N-acetylgalactosaminyltransferase 10                                             |
| Gene_Symbol=GALNT2 Polypeptide N-acetylgalactosaminyltransferase 2                                                            |
| Gene_Symbol=GALNT5 Polypeptide N-acetylgalactosaminyltransferase 5                                                            |
| Gene_Symbol=GALNT6 Polypeptide N-acetylgalactosaminyltransferase 6                                                            |
| Gene_Symbol=GALNT7 N-acetylgalactosaminyltransferase 7                                                                        |
| Gene_Symbol=GALNTL1 Isoform 1 of Putative polypeptide N-acetylgalactosaminyltransferase-like protein 1                        |
| Gene_Symbol=GANAB 107 kDa protein                                                                                             |
| Gene_Symbol=GANAB Isoform 2 of Neutral alpha-glucosidase AB precursor                                                         |
| Gene_Symbol=GAPDH Glyceraldehyde-3-phosphate dehydrogenase                                                                    |
| Gene_Symbol=GARS Glycyl-tRNA synthetase                                                                                       |
| Gene_Symbol=GART Isoform Long of Trifunctional purine biosynthetic protein adenosine-3                                        |
| Gene_Symbol=GAS6 Isoform 2 of Growth-arrest-specific protein 6 precursor                                                      |
| Gene_Symbol=GATAD2B Transcriptional repressor p66 beta                                                                        |
| Gene_Symbol=GBA Isoform Long of Glucosylceramidase precursor                                                                  |
| Gene_Symbol=GBE1 1,4-alpha-glucan branching enzyme                                                                            |
| Gene_Symbol=GCG Glucagon precursor                                                                                            |
| Gene_Symbol=GCLC Glutamate--cysteine ligase catalytic subunit                                                                 |
| Gene_Symbol=GCLM Glutamate--cysteine ligase regulatory subunit                                                                |
| Gene_Symbol=GCN1L1 GCN1-like protein 1                                                                                        |
| Gene_Symbol=GCNT2 glucosaminyl (N-acetyl) transferase 2, I-branching enzyme isoform A                                         |
| Gene_Symbol=GDA Guanine deaminase                                                                                             |
| Gene_Symbol=GDF15 Growth/differentiation factor 15 precursor                                                                  |
| Gene_Symbol=GDI1 Rab GDP dissociation inhibitor alpha                                                                         |
| Gene_Symbol=GDI2 GDP dissociation inhibitor 2                                                                                 |
| Gene_Symbol=GDI2 Rab GDP dissociation inhibitor beta                                                                          |
| Gene_Symbol=GFPT1 Isoform 1 of Glucosamine--fructose-6-phosphate aminotransferase [isomerizing] 1                             |
| Gene_Symbol=GGH Gamma-glutamyl hydrolase precursor                                                                            |
| Gene_Symbol=GIPC1 PDZ domain-containing protein GIPC1                                                                         |
| Gene_Symbol=GJA10;MYCBP C-Myc-binding protein                                                                                 |
| Gene_Symbol=GLA Alpha-galactosidase A precursor                                                                               |
| Gene_Symbol=GLB1 Beta-galactosidase precursor                                                                                 |
| Gene_Symbol=GLCE D-glucuronyl C5-epimerase                                                                                    |
| Gene_Symbol=GLG1 golgi apparatus protein 1                                                                                    |
| Gene_Symbol=GLO1 Lactoylglutathione lyase                                                                                     |
| Gene_Symbol=GLOD4 Uncharacterized protein C17orf25                                                                            |
| Gene_Symbol=GLRX Glutaredoxin-1                                                                                               |
| Gene_Symbol=GLT25D1 CDNA PSEC0241 fis, clone NT2RP3000234, moderately similar to Homo sapiens cerebral cell adhesion molecule |
| Gene_Symbol=GM2A Ganglioside GM2 activator precursor                                                                          |
| Gene_Symbol=GMFB Glia maturation factor beta                                                                                  |
| Gene_Symbol=GMPS GMP synthase                                                                                                 |
| Gene_Symbol=GNB1 Guanine nucleotide-binding protein G(I)/G(S)/G(T) subunit beta 1                                             |

|                                                                                                                              |
|------------------------------------------------------------------------------------------------------------------------------|
| Gene_Symbol=GNB2L1 Lung cancer oncogene 7                                                                                    |
| Gene_Symbol=GNPDA1 Glucosamine-6-phosphate isomerase                                                                         |
| Gene_Symbol=GNPDA2 Glucosamine-6-phosphate isomerase SB52                                                                    |
| Gene_Symbol=GNPTG N-acetylglucosamine-1-phosphotransferase subunit gamma precursor                                           |
| Gene_Symbol=GNS N-acetylglucosamine-6-sulfatase precursor                                                                    |
| Gene_Symbol=GOLPH2 Golgi phosphoprotein 2                                                                                    |
| Gene_Symbol=GOLPH2 Isoform 2 of Golgi phosphoprotein 2                                                                       |
| Gene_Symbol=GOLPH4 golgi phosphoprotein 4                                                                                    |
| Gene_Symbol=GORASP2 Isoform 1 of Golgi reassembly-stacking protein 2                                                         |
| Gene_Symbol=GORASP2 Isoform 2 of Golgi reassembly-stacking protein 2                                                         |
| Gene_Symbol=GOT1 Aspartate aminotransferase, cytoplasmic                                                                     |
| Gene_Symbol=GOT2 Aspartate aminotransferase, mitochondrial precursor                                                         |
| Gene_Symbol=GPC1 Glypican-1 precursor                                                                                        |
| Gene_Symbol=GPC4 Glypican-4 precursor                                                                                        |
| Gene_Symbol=GPC6 Glypican-6 precursor                                                                                        |
| Gene_Symbol=GPI Glucose-6-phosphate isomerase                                                                                |
| Gene_Symbol=GPIAP1 GPI-anchored membrane protein 1                                                                           |
| Gene_Symbol=GPIAP1 membrane component chromosome 11 surface marker 1 isoform 1                                               |
| Gene_Symbol=GPR126 Developmentally regulated G-protein-coupled receptor alpha 2                                              |
| Gene_Symbol=GPR126 Developmentally regulated G-protein-coupled receptor beta 1                                               |
| Gene_Symbol=GPR37 Probable G-protein coupled receptor 37 precursor                                                           |
| Gene_Symbol=GPR56 G protein-coupled receptor 56 isoform b                                                                    |
| Gene_Symbol=GPX3 Glutathione peroxidase 3 precursor                                                                          |
| Gene_Symbol=GRB2 Isoform 1 of Growth factor receptor-bound protein 2                                                         |
| Gene_Symbol=GREM2 Gremlin-2 precursor                                                                                        |
| Gene_Symbol=GRHPR Glyoxylate reductase/hydroxypyruvate reductase                                                             |
| Gene_Symbol=GRHPR GRHPR protein (Fragment)                                                                                   |
| Gene_Symbol=GRN Isoform 1 of Granulins precursor                                                                             |
| Gene_Symbol=GRP Isoform 1 of Gastrin-releasing peptide precursor                                                             |
| Gene_Symbol=GRP Isoform 2 of Gastrin-releasing peptide precursor                                                             |
| Gene_Symbol=GSN Isoform 1 of Gelsolin precursor                                                                              |
| Gene_Symbol=GSPT1 G1 to S phase transition protein 1 homolog                                                                 |
| Gene_Symbol=GSR Isoform Mitochondrial of Glutathione reductase, mitochondrial precursor                                      |
| Gene_Symbol=GSS Glutathione synthetase                                                                                       |
| Gene_Symbol=GSTA1 Glutathione S-transferase A1                                                                               |
| Gene_Symbol=GSTO1 Glutathione transferase omega-1                                                                            |
| Gene_Symbol=GSTP1 Glutathione S-transferase P                                                                                |
| Gene_Symbol=GTPBP9 Isoform 1 of Putative GTP-binding protein 9                                                               |
| Gene_Symbol=H1FX Histone H1x                                                                                                 |
| Gene_Symbol=H2AFV Histone H2AV                                                                                               |
| Gene_Symbol=H2AFY2 Core histone macro-H2A.2                                                                                  |
| Gene_Symbol=H3F3A;H3F3B Histone H3.3                                                                                         |
| Gene_Symbol=HAGH Hydroxyacylglutathione hydrolase                                                                            |
| Gene_Symbol=HARS Histidyl-tRNA synthetase, cytoplasmic                                                                       |
| Gene_Symbol=HBA1;HBA2 Hemoglobin subunit alpha                                                                               |
| Gene_Symbol=HBE1 Hemoglobin subunit epsilon                                                                                  |
| Gene_Symbol=hCG_2015138 similar to Phosphoglycerate mutase 1 (Phosphoglycerate mutase isozyme B) (PGAM-B) (BPG-dependent PG/ |
| Gene_Symbol=hCG_2015269 similar to Phosphoglycerate mutase 1 (Phosphoglycerate mutase isozyme B) (PGAM-B) (BPG-dependent PG/ |
| Gene_Symbol=hCG_2028557 similar to unactive progesterone receptor, 23 kD                                                     |
| Gene_Symbol=HDAC2 histone deacetylase 2                                                                                      |
| Gene_Symbol=HDGF Hepatoma-derived growth factor                                                                              |
| Gene_Symbol=HDGFRP3 Hepatoma-derived growth factor-related protein 3                                                         |
| Gene_Symbol=HDLBP Vigilin                                                                                                    |

|                                                                                                                         |
|-------------------------------------------------------------------------------------------------------------------------|
| Gene_Symbol=HEXA Beta-hexosaminidase alpha chain precursor                                                              |
| Gene_Symbol=HEXB Beta-hexosaminidase beta chain precursor                                                               |
| Gene_Symbol=HGD Homogentisate 1,2-dioxygenase                                                                           |
| Gene_Symbol=HINT1 Histidine triad nucleotide-binding protein 1                                                          |
| Gene_Symbol=HINT2 Histidine triad nucleotide-binding protein 2                                                          |
| Gene_Symbol=HIP1R Huntingtin-interacting protein 1-related protein                                                      |
| Gene_Symbol=HIP2 Isoform 1 of Ubiquitin-conjugating enzyme E2-25 kDa                                                    |
| Gene_Symbol=HIP2 Isoform 2 of Ubiquitin-conjugating enzyme E2-25 kDa                                                    |
| Gene_Symbol=HIST1H1B Histone H1.5                                                                                       |
| Gene_Symbol=HIST1H1C Histone H1.2                                                                                       |
| Gene_Symbol=HIST1H1D Histone H1.3                                                                                       |
| Gene_Symbol=HIST1H2AA Histone H2A type 1-A                                                                              |
| Gene_Symbol=HIST1H2AE;HIST1H2AB Histone H2A type 1-B                                                                    |
| Gene_Symbol=HIST1H2AH Histone H2A type 1-H                                                                              |
| Gene_Symbol=HIST1H2BD Histone H2B type 1-D                                                                              |
| Gene_Symbol=HIST1H2BL Histone H2B type 1-L                                                                              |
| Gene_Symbol=HIST1H2BO Histone H2B type 1-O                                                                              |
| Gene_Symbol=HIST1H3C;HIST1H3G;HIST1H3H;HIST1H3D;HIST1H3I;HIST1H3J;HIST1H3A;HIST1H3F;HIST1H3E;HIST1H3B Histone H3.       |
| Gene_Symbol=HIST1H4C;HIST2H4B;HIST2H4A;HIST1H4H;HIST1H4F;HIST1H4L;HIST1H4J;HIST1H4B;HIST1H4I;HIST1H4D;HIST4H4;HI        |
| Gene_Symbol=HIST2H2AA3;HIST2H2AA4 Histone H2A type 2-A                                                                  |
| Gene_Symbol=HIST2H2AC Histone H2A type 2-C                                                                              |
| Gene_Symbol=HIST2H2BC Histone H2B type 2-C                                                                              |
| Gene_Symbol=HIST2H2BE Histone H2B type 2-E                                                                              |
| Gene_Symbol=HIST2H3A;HIST2H3C Histone H3.2                                                                              |
| Gene_Symbol=HK1 Isoform 1 of Hexokinase-1                                                                               |
| Gene_Symbol=HK2 Hexokinase-2                                                                                            |
| Gene_Symbol=HLA-A HLA class I histocompatibility antigen, A-2 alpha chain precursor                                     |
| Gene_Symbol=HLA-A HLA class I histocompatibility antigen, A-24 alpha chain precursor                                    |
| Gene_Symbol=HLA-A HLA class I histocompatibility antigen, A-68 alpha chain precursor                                    |
| Gene_Symbol=HLA-A HLA class I histocompatibility antigen, A-69 alpha chain                                              |
| Gene_Symbol=HLA-A HLA class I histocompatibility antigen, A-80 alpha chain precursor                                    |
| Gene_Symbol=HLA-A Isoform 2 of HLA class I histocompatibility antigen, A-11 alpha chain precursor                       |
| Gene_Symbol=HLA-C;HLA-B;MICA;LOC730410 HLA class I histocompatibility antigen, B-50 alpha chain precursor               |
| Gene_Symbol=HLA-C;HLA-B;MICA;LOC730410 HLA class I histocompatibility antigen, B-56 alpha chain precursor               |
| Gene_Symbol=HLA-C;HLA-B;MICA;LOC730410 HLA class I histocompatibility antigen, B-58 alpha chain precursor               |
| Gene_Symbol=HLA-C;HLA-B;MICA;LOC730410 HLA class I histocompatibility antigen, Cw-15 alpha chain precursor              |
| Gene_Symbol=HLA-C;HLA-B;MICA;LOC730410 HLA class I histocompatibility antigen, Cw-2 alpha chain precursor               |
| Gene_Symbol=HLA-C;HLA-B;MICA;LOC730410 HLA class I histocompatibility antigen, Cw-3 alpha chain precursor               |
| Gene_Symbol=HLA-C;HLA-B;MICA;LOC730410 HLA class I histocompatibility antigen, Cw-6 alpha chain precursor               |
| Gene_Symbol=HLA-C;HLA-B;MICA;LOC730410 Isoform 2 of HLA class I histocompatibility antigen, Cw-16 alpha chain precursor |
| Gene_Symbol=HLA-C;HLA-B;MICA;LOC730410 Major histocompatibility complex, class I, C                                     |
| Gene_Symbol=HLA-C;HLA-B;MICA;LOC730410 MHC class I antigen heavy chain                                                  |
| Gene_Symbol=HLA-C;HLA-B;MICA;LOC730410 MHC class I chain-related protein A                                              |
| Gene_Symbol=HLA-H HLA class I histocompatibility antigen, alpha chain H precursor                                       |
| Gene_Symbol=HMBS Isoform 1 of Porphobilinogen deaminase                                                                 |
| Gene_Symbol=HMGB1 High mobility group protein B1                                                                        |
| Gene_Symbol=HMGB1 High-mobility group box 1 variant (Fragment)                                                          |
| Gene_Symbol=HMGB2 High mobility group protein B2                                                                        |
| Gene_Symbol=HMGB3 High mobility group protein B3                                                                        |
| Gene_Symbol=HN1 Isoform 1 of Hematological and neurological expressed 1 protein                                         |
| Gene_Symbol=HN1 Isoform 2 of Hematological and neurological expressed 1 protein                                         |
| Gene_Symbol=HNRPA0 Heterogeneous nuclear ribonucleoprotein A0                                                           |





|                                                                                                              |
|--------------------------------------------------------------------------------------------------------------|
| Gene_Symbol=IARS Isoleucyl-tRNA synthetase, cytoplasmic                                                      |
| Gene_Symbol=ICAM1 Intercellular adhesion molecule 1 precursor                                                |
| Gene_Symbol=ICAM5 Intercellular adhesion molecule 5 precursor                                                |
| Gene_Symbol=ICOSLG 52 kDa protein                                                                            |
| Gene_Symbol=IDE Insulin-degrading enzyme                                                                     |
| Gene_Symbol=IDH1 Isocitrate dehydrogenase [NADP] cytoplasmic                                                 |
| Gene_Symbol=IDH2 Isocitrate dehydrogenase [NADP], mitochondrial precursor                                    |
| Gene_Symbol=IDI1 isopentenyl-diphosphate delta isomerase                                                     |
| Gene_Symbol=IGF1 Insulin-like growth factor IB precursor                                                     |
| Gene_Symbol=IGF2R Cation-independent mannose-6-phosphate receptor precursor                                  |
| Gene_Symbol=IGFBP2 Insulin-like growth factor-binding protein 2 precursor                                    |
| Gene_Symbol=IGFBP3 insulin-like growth factor binding protein 3 isoform a precursor                          |
| Gene_Symbol=IGFBP3 Insulin-like growth factor-binding protein 3 precursor                                    |
| Gene_Symbol=IGFBP5 Insulin-like growth factor-binding protein 5 precursor                                    |
| Gene_Symbol=IGFBP6 Insulin-like growth factor-binding protein 6 precursor                                    |
| Gene_Symbol=IGFBP7 Insulin-like growth factor-binding protein 7 precursor                                    |
| Gene_Symbol=IGFBPL1 Insulin-like growth factor binding protein-like 1                                        |
| Gene_Symbol=IGSF8 Isoform 1 of Immunoglobulin superfamily member 8 precursor                                 |
| Gene_Symbol=IL13RA1 Interleukin-13 receptor alpha-1 chain precursor                                          |
| Gene_Symbol=IL17C Interleukin-17C precursor                                                                  |
| Gene_Symbol=IL1R2 Interleukin-1 receptor type II precursor                                                   |
| Gene_Symbol=IL6 Interleukin-6 precursor                                                                      |
| Gene_Symbol=IL6ST Isoform 1 of Interleukin-6 receptor subunit beta precursor                                 |
| Gene_Symbol=ILF2 Interleukin enhancer-binding factor 2                                                       |
| Gene_Symbol=ILF3 Isoform 1 of Interleukin enhancer-binding factor 3                                          |
| Gene_Symbol=ILF3 Isoform 5 of Interleukin enhancer-binding factor 3                                          |
| Gene_Symbol=ILKAP Integrin-linked kinase-associated serine/threonine phosphatase 2C                          |
| Gene_Symbol=IMMT Isoform 1 of Mitochondrial inner membrane protein                                           |
| Gene_Symbol=IMPA1 Inositol monophosphatase                                                                   |
| Gene_Symbol=IMPDH2 Inosine-5'-monophosphate dehydrogenase 2                                                  |
| Gene_Symbol=INSM1 Insulinoma-associated protein 1                                                            |
| Gene_Symbol=IPO7 120 kDa protein                                                                             |
| Gene_Symbol=IQGAP1 Ras GTPase-activating-like protein IQGAP1                                                 |
| Gene_Symbol=ISG15 Interferon-induced 17 kDa protein precursor                                                |
| Gene_Symbol=ISYNA1 55 kDa protein                                                                            |
| Gene_Symbol=ITGB1 integrin beta 1 isoform 1A precursor                                                       |
| Gene_Symbol=ITGB4BP Eukaryotic translation initiation factor 6                                               |
| Gene_Symbol=ITGBL1 Ten integrin EGF-like repeat domains protein precursor                                    |
| Gene_Symbol=ITM2B Integral membrane protein 2B                                                               |
| Gene_Symbol=ITPA inosine triphosphatase isoform b                                                            |
| Gene_Symbol=JAG1 Jagged-1 precursor                                                                          |
| Gene_Symbol=KARS Lysyl-tRNA synthetase                                                                       |
| Gene_Symbol=KCTD12 BTB/POZ domain-containing protein KCTD12                                                  |
| Gene_Symbol=KHDRBS1 Isoform 1 of KH domain-containing, RNA-binding, signal transduction-associated protein 1 |
| Gene_Symbol=KHDRBS1 Isoform 3 of KH domain-containing, RNA-binding, signal transduction-associated protein 1 |
| Gene_Symbol=KHSRP Far upstream element-binding protein 2                                                     |
| Gene_Symbol=KHSRP KH-type splicing regulatory protein                                                        |
| Gene_Symbol=KIAA0310 hypothetical protein LOC9919                                                            |
| Gene_Symbol=KIAA0319L KIAA0319-like                                                                          |
| Gene_Symbol=KIAA1598 Protein KIAA1598                                                                        |
| Gene_Symbol=KIAA1822L hypothetical protein LOC79802                                                          |
| Gene_Symbol=KIAA1967 Isoform 1 of Protein KIAA1967                                                           |

|                                                                                                                       |
|-----------------------------------------------------------------------------------------------------------------------|
| Gene_Symbol=KIF5B Kinesin heavy chain                                                                                 |
| Gene_Symbol=KIT Mast/stem cell growth factor receptor precursor                                                       |
| Gene_Symbol=KITLG Isoform 2 of Kit ligand precursor                                                                   |
| Gene_Symbol=KLC1 Isoform K of Kinesin light chain 1                                                                   |
| Gene_Symbol=KLK11 Isoform 1 of Kallikrein-11 precursor                                                                |
| Gene_Symbol=KLK14 kallikrein 14 preproprotein                                                                         |
| Gene_Symbol=KPNA2 Importin alpha-2 subunit                                                                            |
| Gene_Symbol=KPNA4 Importin alpha-4 subunit                                                                            |
| Gene_Symbol=KPNB1 Importin beta-1 subunit                                                                             |
| Gene_Symbol=KREMEN1 Isoform 1 of Kremen protein 1 precursor                                                           |
| Gene_Symbol=KRT1 Keratin, type II cytoskeletal 1                                                                      |
| Gene_Symbol=KRT16 Keratin, type I cytoskeletal 16                                                                     |
| Gene_Symbol=KRT18 49 kDa protein                                                                                      |
| Gene_Symbol=KRT18 Keratin, type I cytoskeletal 18                                                                     |
| Gene_Symbol=KRT19 Keratin, type I cytoskeletal 19                                                                     |
| Gene_Symbol=KRT3 Keratin, type II cytoskeletal 3                                                                      |
| Gene_Symbol=KRT7 Keratin, type II cytoskeletal 7                                                                      |
| Gene_Symbol=KRT8 Keratin, type II cytoskeletal 8                                                                      |
| Gene_Symbol=KRT9 Keratin, type I cytoskeletal 9                                                                       |
| Gene_Symbol=KTN1 Isoform 1 of Kinectin                                                                                |
| Gene_Symbol=KYNU Kynureninase                                                                                         |
| Gene_Symbol=L1CAM Isoform 1 of Neural cell adhesion molecule L1 precursor                                             |
| Gene_Symbol=LAMA1 Laminin subunit alpha-1 precursor                                                                   |
| Gene_Symbol=LAMA2 laminin alpha 2 subunit isoform b precursor                                                         |
| Gene_Symbol=LAMA5 400 kDa protein                                                                                     |
| Gene_Symbol=LAMA5 Laminin subunit alpha-5 precursor                                                                   |
| Gene_Symbol=LAMB1 Laminin subunit beta-1 precursor                                                                    |
| Gene_Symbol=LAMB2 Laminin subunit beta-2 precursor                                                                    |
| Gene_Symbol=LAMC1 Laminin subunit gamma-1 precursor                                                                   |
| Gene_Symbol=LAMP2 Isoform LAMP-2A of Lysosome-associated membrane glycoprotein 2 precursor                            |
| Gene_Symbol=LAP3 Isoform 1 of Cytosol aminopeptidase                                                                  |
| Gene_Symbol=LARS Leucyl-tRNA synthetase, cytoplasmic                                                                  |
| Gene_Symbol=LCN1 Lipocalin-1 precursor                                                                                |
| Gene_Symbol=LCP1 Plastin-2                                                                                            |
| Gene_Symbol=LDHA Isoform 1 of L-lactate dehydrogenase A chain                                                         |
| Gene_Symbol=LDHB L-lactate dehydrogenase B chain                                                                      |
| Gene_Symbol=LDLR Low-density lipoprotein receptor                                                                     |
| Gene_Symbol=LDLR Low-density lipoprotein receptor precursor                                                           |
| Gene_Symbol=LEMD3 Inner nuclear membrane protein Man1                                                                 |
| Gene_Symbol=LEPRE1 Isoform 3 of Prolyl 3-hydroxylase 1 precursor                                                      |
| Gene_Symbol=LFNG Isoform 1 of Beta-1,3-N-acetylglucosaminyltransferase lunatic fringe                                 |
| Gene_Symbol=LGALS1 Galectin-1                                                                                         |
| Gene_Symbol=LGALS3 Galectin-3                                                                                         |
| Gene_Symbol=LGALS3BP Galectin-3-binding protein precursor                                                             |
| Gene_Symbol=LGMN Legumain precursor                                                                                   |
| Gene_Symbol=LIMA1 Isoform Beta of LIM domain and actin-binding protein 1                                              |
| Gene_Symbol=LIPA CDNA FLJ43203 fis, clone FEBRA2008468, highly similar to LYSOSOMAL ACID LIPASE/CHOLESTERYL ESTER HYD |
| Gene_Symbol=LIPA Isoform 1 of Lysosomal acid lipase/cholesteryl ester hydrolase precursor                             |
| Gene_Symbol=LIPG Isoform 1 of Endothelial lipase precursor                                                            |
| Gene_Symbol=LMAN1 ERGIC-53 protein precursor                                                                          |
| Gene_Symbol=LMAN2 Vesicular integral-membrane protein VIP36 precursor                                                 |
| Gene_Symbol=LMNA Isoform A of Lamin-A/C                                                                               |
| Gene_Symbol=LMNA Isoform C of Lamin-A/C                                                                               |

|                                                                                                      |
|------------------------------------------------------------------------------------------------------|
| Gene_Symbol=LMNB1 Lamin-B1                                                                           |
| Gene_Symbol=LMNB2 Lamin B2                                                                           |
| Gene_Symbol=LOC196463 Hypothetical protein LOC196463                                                 |
| Gene_Symbol=LOC253012 WLKV305                                                                        |
| Gene_Symbol=LOC388720 similar to ubiquitin and ribosomal protein S27a precursor                      |
| Gene_Symbol=LOC389842 similar to Ran-specific GTPase-activating protein                              |
| Gene_Symbol=LOC440055 similar to ribosomal protein S12                                               |
| Gene_Symbol=LOC51035 Isoform 1 of SAPK substrate protein 1                                           |
| Gene_Symbol=LOC646993 similar to high-mobility group box 3                                           |
| Gene_Symbol=LOC652595 BA395L14.12                                                                    |
| Gene_Symbol=LOC653269 similar to Prostate, ovary, testis expressed protein on chromosome 2 isoform 2 |
| Gene_Symbol=LOC653994;EIF4H Isoform Long of Eukaryotic translation initiation factor 4H              |
| Gene_Symbol=LOC728320 similar to lactotransferrin                                                    |
| Gene_Symbol=LOC728641;FABP5;LOC731043 Fatty acid-binding protein, epidermal                          |
| Gene_Symbol=LOC731751 similar to protein kinase, DNA-activated, catalytic polypeptide                |
| Gene_Symbol=LOC84661 Dpy-30-like protein                                                             |
| Gene_Symbol=LOXL2 Lysyl oxidase-like 2 variant                                                       |
| Gene_Symbol=LOXL2;ENTPD4 Lysyl oxidase homolog 2 precursor                                           |
| Gene_Symbol=LPHN1 Isoform 1 of Latrophilin-1 precursor                                               |
| Gene_Symbol=LPP Lipoma-preferred partner                                                             |
| Gene_Symbol=LRBA Lipopolysaccharide-responsive and beige-like anchor protein                         |
| Gene_Symbol=LRP11 Isoform 1 of Low-density lipoprotein receptor-related protein 11 precursor         |
| Gene_Symbol=LRP2 Low-density lipoprotein receptor-related protein 2 precursor                        |
| Gene_Symbol=LRP8 Isoform 1 of Low-density lipoprotein receptor-related protein 8 precursor           |
| Gene_Symbol=LRRC47 Leucine-rich repeat-containing protein 47                                         |
| Gene_Symbol=LRRC59 Leucine-rich repeat-containing protein 59                                         |
| Gene_Symbol=LRRFIP1 Isoform 1 of Leucine-rich repeat flightless-interacting protein 1                |
| Gene_Symbol=LRRFIP1 Isoform 2 of Leucine-rich repeat flightless-interacting protein 1                |
| Gene_Symbol=LRRTM1 Leucine-rich repeat transmembrane neuronal protein 1 precursor                    |
| Gene_Symbol=LSM8 U6 snRNA-associated Sm-like protein LSM8                                            |
| Gene_Symbol=LSR Isoform 1 of Lipolysis-stimulated lipoprotein receptor                               |
| Gene_Symbol=LSR Isoform 2 of Lipolysis-stimulated lipoprotein receptor                               |
| Gene_Symbol=LTA4H Isoform 1 of Leukotriene A-4 hydrolase                                             |
| Gene_Symbol=LTA4H Isoform 2 of Leukotriene A-4 hydrolase                                             |
| Gene_Symbol=LTB4DH NADP-dependent leukotriene B4 12-hydroxydehydrogenase                             |
| Gene_Symbol=LTBP3 Isoform 1 of Latent-transforming growth factor beta-binding protein 3 precursor    |
| Gene_Symbol=LTBP4 latent transforming growth factor beta binding protein 4 isoform c                 |
| Gene_Symbol=LUC7L2 Isoform 1 of Putative RNA-binding protein Luc7-like 2                             |
| Gene_Symbol=LUC7L2 Isoform 2 of Putative RNA-binding protein Luc7-like 2                             |
| Gene_Symbol=LUM Lumican precursor                                                                    |
| Gene_Symbol=LYPLA3 1-O-acylceramide synthase precursor                                               |
| Gene_Symbol=M6PRBP1 Isoform B of Mannose-6-phosphate receptor-binding protein 1                      |
| Gene_Symbol=MACF1 Isoform 2 of Microtubule-actin cross-linking factor 1, isoforms 1/2/3/5            |
| Gene_Symbol=MACF1 Microtubule-actin cross-linking factor 1, isoform 4                                |
| Gene_Symbol=MAGEA10 Melanoma-associated antigen 10                                                   |
| Gene_Symbol=MAGEA4 Melanoma-associated antigen 4                                                     |
| Gene_Symbol=MAGED2 Isoform 1 of Melanoma-associated antigen D2                                       |
| Gene_Symbol=MAN1A1 Mannosyl-oligosaccharide 1,2-alpha-mannosidase IA                                 |
| Gene_Symbol=MAN1A2 Mannosyl-oligosaccharide 1,2-alpha-mannosidase IB                                 |
| Gene_Symbol=MAN1B1 Endoplasmic reticulum mannosyl-oligosaccharide 1,2-alpha-mannosidase              |
| Gene_Symbol=MAN2A1 Alpha-mannosidase 2                                                               |
| Gene_Symbol=MAP1B Microtubule-associated protein 1B                                                  |

|                                                                                                                       |
|-----------------------------------------------------------------------------------------------------------------------|
| Gene_Symbol=MAP2 Isoform 1 of Microtubule-associated protein 2                                                        |
| Gene_Symbol=MAP2K1 Dual specificity mitogen-activated protein kinase kinase 1                                         |
| Gene_Symbol=MAP4 Isoform 1 of Microtubule-associated protein 4                                                        |
| Gene_Symbol=MAP4 Isoform 2 of Microtubule-associated protein 4                                                        |
| Gene_Symbol=MAP4 Microtubule-associated protein 4 isoform 1 variant (Fragment)                                        |
| Gene_Symbol=MAPK1 Mitogen-activated protein kinase 1                                                                  |
| Gene_Symbol=MAPRE1 Microtubule-associated protein RP/EB family member 1                                               |
| Gene_Symbol=MARCKS Myristoylated alanine-rich C-kinase substrate                                                      |
| Gene_Symbol=MARCKSL1 MARCKS-related protein                                                                           |
| Gene_Symbol=MARS Methionyl-tRNA synthetase, cytoplasmic                                                               |
| Gene_Symbol=MAT2A S-adenosylmethionine synthetase isoform type-2                                                      |
| Gene_Symbol=MAT2B methionine adenosyltransferase II, beta isoform 1                                                   |
| Gene_Symbol=MATN2 Isoform 2 of Matrilin-2 precursor                                                                   |
| Gene_Symbol=MATN3 Matrilin-3 precursor                                                                                |
| Gene_Symbol=MATR3 100 kDa protein                                                                                     |
| Gene_Symbol=MATR3 Matrin-3                                                                                            |
| Gene_Symbol=MBTPS1 MBTPS1 protein                                                                                     |
| Gene_Symbol=MCAM Isoform 1 of Cell surface glycoprotein MUC18 precursor                                               |
| Gene_Symbol=MCM3 DNA replication licensing factor MCM3                                                                |
| Gene_Symbol=MCM4 DNA replication licensing factor MCM4                                                                |
| Gene_Symbol=MCM6 DNA replication licensing factor MCM6                                                                |
| Gene_Symbol=MCM7 Isoform 1 of DNA replication licensing factor MCM7                                                   |
| Gene_Symbol=MDC1 Isoform 1 of Mediator of DNA damage checkpoint protein 1                                             |
| Gene_Symbol=MDH1 Malate dehydrogenase, cytoplasmic                                                                    |
| Gene_Symbol=MDH2 Malate dehydrogenase, mitochondrial precursor                                                        |
| Gene_Symbol=MDK Midkine precursor                                                                                     |
| Gene_Symbol=ME1 NADP-dependent malic enzyme                                                                           |
| Gene_Symbol=MESDC2 Mesoderm development candidate 2                                                                   |
| Gene_Symbol=MET Isoform 1 of Hepatocyte growth factor receptor precursor                                              |
| Gene_Symbol=METAP2 CDNA FLJ34411 fis, clone HEART2002220, highly similar to METHIONINE AMINOPEPTIDASE 2               |
| Gene_Symbol=METAP2 Similar to methionyl aminopeptidase 2                                                              |
| Gene_Symbol=MFAP2 Microfibrillar-associated protein 2 precursor                                                       |
| Gene_Symbol=MFGE8 Lactadherin precursor                                                                               |
| Gene_Symbol=MGAT2 Alpha-1,6-mannosyl-glycoprotein 2-beta-N-acetylglucosaminyltransferase                              |
| Gene_Symbol=MGAT4A mannosyl (alpha-1,3-)-glycoprotein beta-1,4-N-acetylglucosaminyltransferase, isoenzyme A           |
| Gene_Symbol=MGAT4B mannosyl (alpha-1,3-)-glycoprotein beta-1,4-N-acetylglucosaminyltransferase, isoenzyme B isoform 2 |
| Gene_Symbol=MGAT5 Alpha-1,6-mannosylglycoprotein 6-beta-N-acetylglucosaminyltransferase V                             |
| Gene_Symbol=MGC11102 CDNA FLJ36810 fis, clone ASTRO2001249                                                            |
| Gene_Symbol=MIA3 similar to melanoma inhibitory activity 3 isoform 1                                                  |
| Gene_Symbol=MICB MHC class I antigen                                                                                  |
| Gene_Symbol=MIF Macrophage migration inhibitory factor                                                                |
| Gene_Symbol=MINPP1 Isoform 1 of Multiple inositol polyphosphate phosphatase 1 precursor                               |
| Gene_Symbol=MKI67 Isoform Long of Antigen KI-67                                                                       |
| Gene_Symbol=MLLT4 Isoform 4 of Afadin                                                                                 |
| Gene_Symbol=MMP1 Interstitial collagenase precursor                                                                   |
| Gene_Symbol=MMP10 Stromelysin-2 precursor                                                                             |
| Gene_Symbol=MMP11 Stromelysin-3 precursor                                                                             |
| Gene_Symbol=MMP2 72 kDa type IV collagenase precursor                                                                 |
| Gene_Symbol=MRC2 Macrophage mannose receptor 2 precursor                                                              |
| Gene_Symbol=MRLC2 Myosin regulatory light chain                                                                       |
| Gene_Symbol=MRPL12 39S ribosomal protein L12, mitochondrial precursor                                                 |
| Gene_Symbol=MRPS16;DNAJC9 DnaJ homolog subfamily C member 9                                                           |

|                                                                                            |
|--------------------------------------------------------------------------------------------|
| Gene_Symbol=MSN Moesin                                                                     |
| Gene_Symbol=MTA2 Metastasis-associated protein MTA2                                        |
| Gene_Symbol=MTAP S-methyl-5-thioadenosine phosphorylase                                    |
| Gene_Symbol=MTHFD1 C-1-tetrahydrofolate synthase, cytoplasmic                              |
| Gene_Symbol=MTPN Myotrophin                                                                |
| Gene_Symbol=MUC1 Isoform 1 of Mucin-1 precursor                                            |
| Gene_Symbol=MUC13 Mucin-13 precursor                                                       |
| Gene_Symbol=MYH9 Myosin-9                                                                  |
| Gene_Symbol=MYL6 19 kDa protein                                                            |
| Gene_Symbol=MYL6 Isoform Non-muscle of Myosin light polypeptide 6                          |
| Gene_Symbol=MYL6 Isoform Smooth muscle of Myosin light polypeptide 6                       |
| Gene_Symbol=MYO1C myosin IC isoform a                                                      |
| Gene_Symbol=MYO6 Isoform 2 of Myosin-VI                                                    |
| Gene_Symbol=NACA Similar to Nascent polypeptide associated complex alpha subunit           |
| Gene_Symbol=NAGLU Alpha-N-acetylglucosaminidase precursor                                  |
| Gene_Symbol=NANS Sialic acid synthase                                                      |
| Gene_Symbol=NAP1L1 Nucleosome assembly protein 1-like 1                                    |
| Gene_Symbol=NAP1L4 Nucleosome assembly protein 1-like 4                                    |
| Gene_Symbol=NAPG Gamma-soluble NSF attachment protein                                      |
| Gene_Symbol=NARG1 Isoform 2 of NMDA receptor-regulated protein 1                           |
| Gene_Symbol=NARS Asparaginyl-tRNA synthetase, cytoplasmic                                  |
| Gene_Symbol=NASP Isoform 1 of Nuclear autoantigenic sperm protein                          |
| Gene_Symbol=NCAM1 Neural cell adhesion molecule 1, 120 kDa isoform variant (Fragment)      |
| Gene_Symbol=NCAM1 Neural cell adhesion molecule 1, 140 kDa isoform precursor               |
| Gene_Symbol=NCBP1 Nuclear cap-binding protein subunit 1                                    |
| Gene_Symbol=NCL Isoform 1 of Nucleolin                                                     |
| Gene_Symbol=NCL Isoform 2 of Nucleolin                                                     |
| Gene_Symbol=NCOA5 Nuclear receptor coactivator 5                                           |
| Gene_Symbol=NDRG1 Protein NDRG1                                                            |
| Gene_Symbol=NDUFV2 NADH dehydrogenase [ubiquinone] flavoprotein 2, mitochondrial precursor |
| Gene_Symbol=NEDD8 NEDD8 precursor                                                          |
| Gene_Symbol=NELL1 Protein kinase C-binding protein NELL1 precursor                         |
| Gene_Symbol=NELL2 Cerebral protein-12                                                      |
| Gene_Symbol=NENF Neudesin precursor                                                        |
| Gene_Symbol=NEO1 Isoform 1 of Neogenin precursor                                           |
| Gene_Symbol=NEO1 Isoform 2 of Neogenin precursor                                           |
| Gene_Symbol=NEU1 Sialidase-1 precursor                                                     |
| Gene_Symbol=NFASC Isoform 7 of Neurofascin precursor                                       |
| Gene_Symbol=NHP2L1 NHP2-like protein 1                                                     |
| Gene_Symbol=NID1 Isoform 1 of Nidogen-1 precursor                                          |
| Gene_Symbol=NID2 Nidogen-2 precursor                                                       |
| Gene_Symbol=NIPSNAP1 Protein NipSnap1                                                      |
| Gene_Symbol=NIPSNAP3A Protein NipSnap3A                                                    |
| Gene_Symbol=NIT1 Isoform 2 of Nitrilase homolog 1                                          |
| Gene_Symbol=NIT2 Nitrilase family member 2                                                 |
| Gene_Symbol=NMB Isoform 1 of Neuromedin-B precursor                                        |
| Gene_Symbol=NME1 NME1-NME2 protein                                                         |
| Gene_Symbol=NME2;NME1;NME1-NME2 NME1-NME2 protein                                          |
| Gene_Symbol=NNT NAD(P) transhydrogenase, mitochondrial precursor                           |
| Gene_Symbol=NOL1 Isoform 1 of Putative RNA methyltransferase NOL1                          |
| Gene_Symbol=NOL5A Nucleolar protein Nop56                                                  |
| Gene_Symbol=NOMO1 Nodal modulator 1 precursor                                              |
| Gene_Symbol=NONO Non-POU domain-containing octamer-binding protein                         |

|                                                                                                     |
|-----------------------------------------------------------------------------------------------------|
| Gene_Symbol=NOP5/NOP58 Nucleolar protein NOP5                                                       |
| Gene_Symbol=NOTCH2 Neurogenic locus notch homolog protein 2 precursor                               |
| Gene_Symbol=NOTCH3 Neurogenic locus notch homolog protein 3 precursor                               |
| Gene_Symbol=NOTUM IMP dehydrogenase/GMP reductase family protein                                    |
| Gene_Symbol=NOV Protein NOV homolog precursor                                                       |
| Gene_Symbol=NP CDNA FLJ25678 fis, clone TST04067, highly similar to PURINE NUCLEOSIDE PHOSPHORYLASE |
| Gene_Symbol=NPC2 Epididymal secretory protein E1 precursor                                          |
| Gene_Symbol=NPEPPS Puromycin-sensitive aminopeptidase                                               |
| Gene_Symbol=NPM1 Isoform 1 of Nucleophosmin                                                         |
| Gene_Symbol=NPM1 Isoform 2 of Nucleophosmin                                                         |
| Gene_Symbol=NPTX1 Neuronal pentraxin-1 precursor                                                    |
| Gene_Symbol=NPTX1 similar to neuronal pentraxin I precursor                                         |
| Gene_Symbol=NPTX2 Neuronal pentraxin-2 precursor                                                    |
| Gene_Symbol=NQO1 Hypothetical protein (Fragment)                                                    |
| Gene_Symbol=NQO1 NAD                                                                                |
| Gene_Symbol=NQO2 Ribosylidihyronicotinamide dehydrogenase                                           |
| Gene_Symbol=NRCAM Isoform 1 of Neuronal cell adhesion molecule precursor                            |
| Gene_Symbol=NRCAM Isoform 3 of Neuronal cell adhesion molecule precursor                            |
| Gene_Symbol=NRCAM NRCAM protein                                                                     |
| Gene_Symbol=NRP1 Isoform 1 of Neuropilin-1 precursor                                                |
| Gene_Symbol=NRP1 Muscle type neuropilin 1                                                           |
| Gene_Symbol=NRP2 neuropilin 2 isoform 4 precursor                                                   |
| Gene_Symbol=NSF Vesicle-fusing ATPase                                                               |
| Gene_Symbol=NSFL1C Isoform 1 of NSFL1 cofactor p47                                                  |
| Gene_Symbol=NSFL1C Isoform 2 of NSFL1 cofactor p47                                                  |
| Gene_Symbol=NSFL1C p47 protein isoform c                                                            |
| Gene_Symbol=NT5C3 Isoform 2 of Cytosolic 5'-nucleotidase III                                        |
| Gene_Symbol=NTN4 Isoform 3 of Netrin-4 precursor                                                    |
| Gene_Symbol=NUCB1 Nucleobindin-1 precursor                                                          |
| Gene_Symbol=NUCB2 Nucleobindin-2 precursor                                                          |
| Gene_Symbol=NUCKS1 Isoform 1 of Nuclear ubiquitous casein and cyclin-dependent kinases substrate    |
| Gene_Symbol=NUDC Nuclear migration protein nudC                                                     |
| Gene_Symbol=NUDT21 Cleavage and polyadenylation specificity factor 5                                |
| Gene_Symbol=NUDT5 ADP-sugar pyrophosphatase                                                         |
| Gene_Symbol=NUDT9 Isoform 1 of ADP-ribose pyrophosphatase, mitochondrial precursor                  |
| Gene_Symbol=NUMA1 Isoform 2 of Nuclear mitotic apparatus protein 1                                  |
| Gene_Symbol=NUTF2 Nuclear transport factor 2                                                        |
| Gene_Symbol=OAF Protein OAF homolog                                                                 |
| Gene_Symbol=OCIAD1 OCIA domain containing 1 isoform 1                                               |
| Gene_Symbol=OLFM1 Isoform 1 of Noelin precursor                                                     |
| Gene_Symbol=OLFML2A CDNA FLJ90228 fis, clone NT2RM2000241 (Fragment)                                |
| Gene_Symbol=OLFML2A olfactomedin-like 2A                                                            |
| Gene_Symbol=OLFML3 Isoform 1 of Olfactomedin-like protein 3 precursor                               |
| Gene_Symbol=OPA1 Isoform 1 of Dynamin-like 120 kDa protein, mitochondrial precursor                 |
| Gene_Symbol=OS9 76 kDa protein                                                                      |
| Gene_Symbol=OS9 Isoform OS-9-2 of Protein OS-9 precursor                                            |
| Gene_Symbol=OS9 Isoform OS-9-3 of Protein OS-9 precursor                                            |
| Gene_Symbol=OTUB1 Hypothetical protein DKFZp564E242                                                 |
| Gene_Symbol=OTUB1 Isoform 2 of Ubiquitin thioesterase protein OTUB1                                 |
| Gene_Symbol=P4HA1 Isoform 1 of Prolyl 4-hydroxylase subunit alpha-1 precursor                       |
| Gene_Symbol=P4HB Protein disulfide-isomerase precursor                                              |
| Gene_Symbol=P704P similar to actin-like protein                                                     |
| Gene_Symbol=PA2G4 Proliferation-associated protein 2G4                                              |

|                                                                                                |
|------------------------------------------------------------------------------------------------|
| Gene_Symbol=PABPC1 70 kDa protein                                                              |
| Gene_Symbol=PABPC1 Isoform 1 of Polyadenylate-binding protein 1                                |
| Gene_Symbol=PABPC4 Isoform 2 of Polyadenylate-binding protein 4                                |
| Gene_Symbol=PABPN1 Isoform 1 of Polyadenylate-binding protein 2                                |
| Gene_Symbol=PAFAH1B1 Isoform 1 of Platelet-activating factor acetylhydrolase IB subunit alpha  |
| Gene_Symbol=PAFAH1B2 Platelet-activating factor acetylhydrolase IB subunit beta                |
| Gene_Symbol=PAFAH1B3 Platelet-activating factor acetylhydrolase IB subunit gamma               |
| Gene_Symbol=PAGE2B Putative G antigen family E member 3                                        |
| Gene_Symbol=PAICS Multifunctional protein ADE2                                                 |
| Gene_Symbol=PAK1 Isoform 1 of Serine/threonine-protein kinase PAK 1                            |
| Gene_Symbol=PAK2 Serine/threonine-protein kinase PAK 2                                         |
| Gene_Symbol=PAK2 similar to p21-activated kinase 2                                             |
| Gene_Symbol=PAM Isoform 1 of Peptidyl-glycine alpha-amidating monooxygenase precursor          |
| Gene_Symbol=PAM Isoform 3 of Peptidyl-glycine alpha-amidating monooxygenase precursor          |
| Gene_Symbol=PAPPA Pappalysin-1 precursor                                                       |
| Gene_Symbol=PAPSS1 Bifunctional 3'-phosphoadenosine 5'-phosphosulfate synthetase 1             |
| Gene_Symbol=PARK7 Protein DJ-1                                                                 |
| Gene_Symbol=PARP1 Poly [ADP-ribose] polymerase 1                                               |
| Gene_Symbol=PBEF1 Isoform 1 of Nicotinamide phosphoribosyltransferase                          |
| Gene_Symbol=PCBD1 Pterin-4-alpha-carbinolamine dehydratase                                     |
| Gene_Symbol=PCBP1 Poly(rC)-binding protein 1                                                   |
| Gene_Symbol=PCBP2 poly(rC)-binding protein 2 isoform b                                         |
| Gene_Symbol=PCDH1 protocadherin 1 isoform 2 precursor                                          |
| Gene_Symbol=PCDH17 Isoform 1 of Protocadherin-17 precursor                                     |
| Gene_Symbol=PCDH19 Isoform 1 of Protocadherin-19 precursor                                     |
| Gene_Symbol=PCDH7 Isoform B of Protocadherin-7 precursor                                       |
| Gene_Symbol=PCDHB10 Protocadherin beta 10 precursor                                            |
| Gene_Symbol=PCDHB5 Protocadherin beta 5 precursor                                              |
| Gene_Symbol=PCID1 PNAS-125                                                                     |
| Gene_Symbol=PCK2 Phosphoenolpyruvate carboxykinase [GTP], mitochondrial precursor              |
| Gene_Symbol=PCMT1 Isoform 1 of Protein-L-isoaspartate(D-aspartate) O-methyltransferase         |
| Gene_Symbol=PCMT1 Protein-L-isoaspartate (D-aspartate) O-methyltransferase                     |
| Gene_Symbol=PCNA Proliferating cell nuclear antigen                                            |
| Gene_Symbol=PCOLCE Procollagen C-endopeptidase enhancer 1 precursor                            |
| Gene_Symbol=PCOLCE2 Procollagen C-endopeptidase enhancer 2 precursor                           |
| Gene_Symbol=PCSK1 Neuroendocrine convertase 1 precursor                                        |
| Gene_Symbol=PCSK1N ProSAAS precursor                                                           |
| Gene_Symbol=PCSK2 Neuroendocrine convertase 2 precursor                                        |
| Gene_Symbol=PCSK5 Proprotein convertase subtilisin/kexin type 5                                |
| Gene_Symbol=PCSK6 Isoform PACE4E-II of Proprotein convertase subtilisin/kexin type 6 precursor |
| Gene_Symbol=PCSK9 Isoform 1 of Proprotein convertase subtilisin/kexin type 9 precursor         |
| Gene_Symbol=PDAP1 28 kDa heat- and acid-stable phosphoprotein                                  |
| Gene_Symbol=PDCD5 Programmed cell death protein 5                                              |
| Gene_Symbol=PDCD6 Programmed cell death protein 6                                              |
| Gene_Symbol=PDCD6IP PDCD6IP protein                                                            |
| Gene_Symbol=PDGFC platelet-derived growth factor C precursor                                   |
| Gene_Symbol=PDGFD Isoform 2 of Platelet-derived growth factor D precursor                      |
| Gene_Symbol=PDGFRL Platelet-derived growth factor receptor-like protein precursor              |
| Gene_Symbol=PDIA3 Protein disulfide-isomerase A3 precursor                                     |
| Gene_Symbol=PDIA4 Protein disulfide-isomerase A4 precursor                                     |
| Gene_Symbol=PDIA6 Isoform 2 of Protein disulfide-isomerase A6 precursor                        |
| Gene_Symbol=PDLIM5 PDZ and LIM domain protein 5                                                |
| Gene_Symbol=PEA15 Astrocytic phosphoprotein PEA-15                                             |

|                                                                                            |
|--------------------------------------------------------------------------------------------|
| Gene_Symbol=PEBP1 Phosphatidylethanolamine-binding protein 1                               |
| Gene_Symbol=PENK Proenkephalin A precursor                                                 |
| Gene_Symbol=PEPD Xaa-Pro dipeptidase                                                       |
| Gene_Symbol=PFAS Phosphoribosylformylglycinamide synthase                                  |
| Gene_Symbol=PFDN2 Prefoldin subunit 2                                                      |
| Gene_Symbol=PFDN4 Prefoldin subunit 4                                                      |
| Gene_Symbol=PFKP Phosphofructokinase, platelet                                             |
| Gene_Symbol=PFN1 Profilin-1                                                                |
| Gene_Symbol=PFN2 Isoform IIb of Profilin-2                                                 |
| Gene_Symbol=PGD 6-phosphogluconate dehydrogenase, decarboxylating                          |
| Gene_Symbol=PGK1 Phosphoglycerate kinase 1                                                 |
| Gene_Symbol=PGLS 6-phosphogluconolactonase                                                 |
| Gene_Symbol=PGM2 Phosphoglucomutase-2                                                      |
| Gene_Symbol=PGRMC1 Membrane-associated progesterone receptor component 1                   |
| Gene_Symbol=PHGDH D-3-phosphoglycerate dehydrogenase                                       |
| Gene_Symbol=PHPT1 14 kDa phosphohistidine phosphatase                                      |
| Gene_Symbol=PIN1 Peptidyl-prolyl cis-trans isomerase NIMA-interacting 1                    |
| Gene_Symbol=PIR Pirin                                                                      |
| Gene_Symbol=PITX1;H2AFY H2A histone family, member Y isoform 2                             |
| Gene_Symbol=PKM2 Isoform M1 of Pyruvate kinase isozymes M1/M2                              |
| Gene_Symbol=PKM2 Isoform M2 of Pyruvate kinase isozymes M1/M2                              |
| Gene_Symbol=PLA2G3 Group 3 secretory phospholipase A2 precursor                            |
| Gene_Symbol=PLA2G7 Platelet-activating factor acetylhydrolase precursor                    |
| Gene_Symbol=PLAT Isoform 1 of Tissue-type plasminogen activator precursor                  |
| Gene_Symbol=PLAU Urokinase-type plasminogen activator precursor                            |
| Gene_Symbol=PLAUR Isoform 1 of Urokinase plasminogen activator surface receptor precursor  |
| Gene_Symbol=PLEC1 Isoform 1 of Plectin-1                                                   |
| Gene_Symbol=PLEC1 plectin 1 isoform 1                                                      |
| Gene_Symbol=PLEC1 plectin 1 isoform 10                                                     |
| Gene_Symbol=PLG Plasminogen precursor                                                      |
| Gene_Symbol=PLOD1 Procollagen-lysine,2-oxoglutarate 5-dioxygenase 1 precursor              |
| Gene_Symbol=PLOD2 Isoform 2 of Procollagen-lysine,2-oxoglutarate 5-dioxygenase 2 precursor |
| Gene_Symbol=PLOD3 Procollagen-lysine,2-oxoglutarate 5-dioxygenase 3 precursor              |
| Gene_Symbol=PLRG1 Isoform 1 of Pleiotropic regulator 1                                     |
| Gene_Symbol=PLS3 plastin 3                                                                 |
| Gene_Symbol=PLTP Isoform 1 of Phospholipid transfer protein precursor                      |
| Gene_Symbol=PLXDC2 Isoform 1 of Plexin domain-containing protein 2 precursor               |
| Gene_Symbol=PLXNB2 similar to Plexin-B2 precursor                                          |
| Gene_Symbol=PNN Protein                                                                    |
| Gene_Symbol=PNPO Pyridoxine-5'-phosphate oxidase                                           |
| Gene_Symbol=POFUT1 Isoform 1 of GDP-fucose protein O-fucosyltransferase 1 precursor        |
| Gene_Symbol=POSTN Isoform 1 of Periostin precursor                                         |
| Gene_Symbol=PPA1 Inorganic pyrophosphatase                                                 |
| Gene_Symbol=PPA2 Isoform 1 of Inorganic pyrophosphatase 2, mitochondrial precursor         |
| Gene_Symbol=PPIA;LOC654188;LOC653214 Peptidyl-prolyl cis-trans isomerase A                 |
| Gene_Symbol=PPIB peptidylprolyl isomerase B precursor                                      |
| Gene_Symbol=PPIE Isoform B of Peptidyl-prolyl cis-trans isomerase E                        |
| Gene_Symbol=PPIF Peptidyl-prolyl cis-trans isomerase, mitochondrial precursor              |
| Gene_Symbol=PPIL3 Isoform 1 of Peptidyl-prolyl cis-trans isomerase-like 3                  |
| Gene_Symbol=PPM1A Isoform Alpha-1 of Protein phosphatase 2C isoform alpha                  |
| Gene_Symbol=PPM1E Protein phosphatase 1E                                                   |
| Gene_Symbol=PPM1G Protein phosphatase 2C isoform gamma                                     |
| Gene_Symbol=PPP1CA Serine/threonine-protein phosphatase PP1-alpha catalytic subunit        |



|                                                                                            |
|--------------------------------------------------------------------------------------------|
| Gene_Symbol=PPP1CB Serine/threonine-protein phosphatase PP1-beta catalytic subunit         |
| Gene_Symbol=PPP1R14B Similar to Protein phosphatase 1 regulatory subunit 14B               |
| Gene_Symbol=PPP2CA Serine/threonine-protein phosphatase 2A catalytic subunit alpha isoform |
| Gene_Symbol=PPP2R1A alpha isoform of regulatory subunit A, protein phosphatase 2           |
| Gene_Symbol=PPP5C Serine/threonine-protein phosphatase 5                                   |
| Gene_Symbol=PPT1 Palmitoyl-protein thioesterase 1                                          |
| Gene_Symbol=PPT1 Palmitoyl-protein thioesterase 1 precursor                                |
| Gene_Symbol=PPT2 Isoform 1 of Lysosomal thioesterase PPT2 precursor                        |
| Gene_Symbol=PRCP prolylcarboxypeptidase isoform 2 preproprotein                            |
| Gene_Symbol=PRDX1 Peroxiredoxin-1                                                          |
| Gene_Symbol=PRDX2 Peroxiredoxin-2                                                          |
| Gene_Symbol=PRDX3 Thioredoxin-dependent peroxide reductase, mitochondrial precursor        |
| Gene_Symbol=PRDX4 Peroxiredoxin-4                                                          |
| Gene_Symbol=PRDX5 Isoform Mitochondrial of Peroxiredoxin-5, mitochondrial precursor        |
| Gene_Symbol=PRDX5 peroxiredoxin 5 precursor, isoform b                                     |
| Gene_Symbol=PRDX6 Peroxiredoxin-6                                                          |
| Gene_Symbol=PRKCSH Glucosidase 2 subunit beta precursor                                    |
| Gene_Symbol=PRKDC Isoform 1 of DNA-dependent protein kinase catalytic subunit              |
| Gene_Symbol=PRMT5 protein arginine methyltransferase 5 isoform b                           |
| Gene_Symbol=PROCR Endothelial protein C receptor precursor                                 |
| Gene_Symbol=PROM1 Prominin-1 precursor                                                     |
| Gene_Symbol=PROS1 Vitamin K-dependent protein S precursor                                  |
| Gene_Symbol=PROSC Proline synthetase co-transcribed bacterial homolog protein              |
| Gene_Symbol=PRPF19 Pre-mRNA-processing factor 19                                           |
| Gene_Symbol=PRPF6 Pre-mRNA-processing factor 6                                             |
| Gene_Symbol=PRPS1 Phosphoribosyl pyrophosphate synthetase 1                                |
| Gene_Symbol=PRPS2 Ribose-phosphate pyrophosphokinase II                                    |
| Gene_Symbol=PRRC1 Hypothetical protein                                                     |
| Gene_Symbol=PRSS1 Trypsin-1 precursor                                                      |
| Gene_Symbol=PRSS2 Protease serine 2 isoform B                                              |
| Gene_Symbol=PRSS23 Serine protease 23 precursor                                            |
| Gene_Symbol=PSAP Isoform Sap-mu-0 of Proactivator polypeptide precursor                    |
| Gene_Symbol=PSAP Isoform Sap-mu-9 of Proactivator polypeptide precursor                    |
| Gene_Symbol=PSAT1 Isoform 1 of Phosphoserine aminotransferase                              |
| Gene_Symbol=PSIP1 Isoform 1 of PC4 and SFRS1-interacting protein                           |
| Gene_Symbol=PSMA1 Isoform Short of Proteasome subunit alpha type 1                         |
| Gene_Symbol=PSMA2 Proteasome subunit alpha type 2                                          |
| Gene_Symbol=PSMA3 Isoform 2 of Proteasome subunit alpha type 3                             |
| Gene_Symbol=PSMA4 26 kDa protein                                                           |
| Gene_Symbol=PSMA4 Proteasome subunit alpha type 4                                          |
| Gene_Symbol=PSMA4 PSMA4 protein                                                            |
| Gene_Symbol=PSMA5 Proteasome subunit alpha type 5                                          |
| Gene_Symbol=PSMA6 Proteasome subunit alpha type 6                                          |
| Gene_Symbol=PSMA7 Isoform 1 of Proteasome subunit alpha type 7                             |
| Gene_Symbol=PSMA7 Isoform 2 of Proteasome subunit alpha type 7                             |
| Gene_Symbol=PSMB1 Proteasome subunit beta type 1 precursor                                 |
| Gene_Symbol=PSMB2 Proteasome subunit beta type 2                                           |
| Gene_Symbol=PSMB3 Proteasome subunit beta type 3                                           |
| Gene_Symbol=PSMB4 Proteasome subunit beta type 4 precursor                                 |
| Gene_Symbol=PSMB5 Hypothetical protein DKFZp686I0180 (Fragment)                            |
| Gene_Symbol=PSMB7 Proteasome subunit beta type 7 precursor                                 |
| Gene_Symbol=PSMB8 Isoform 1 of Proteasome subunit beta type 8 precursor                    |
| Gene_Symbol=PSMC4 Isoform 1 of 26S protease regulatory subunit 6B                          |
| Gene_Symbol=PSMC5 26S protease regulatory subunit 8                                        |

|                                                                                          |
|------------------------------------------------------------------------------------------|
| Gene_Symbol=PSMC6 26S protease regulatory subunit S10B                                   |
| Gene_Symbol=PSMD1 Isoform 1 of 26S proteasome non-ATPase regulatory subunit 1            |
| Gene_Symbol=PSMD11 Proteasome 26S non-ATPase subunit 11 variant (Fragment)               |
| Gene_Symbol=PSMD12 26S proteasome non-ATPase regulatory subunit 12                       |
| Gene_Symbol=PSMD13 proteasome 26S non-ATPase subunit 13 isoform 2                        |
| Gene_Symbol=PSMD2 26S proteasome non-ATPase regulatory subunit 2                         |
| Gene_Symbol=PSMD2 P67                                                                    |
| Gene_Symbol=PSMD3 26S proteasome non-ATPase regulatory subunit 3                         |
| Gene_Symbol=PSMD4 Isoform Rpn10A of 26S proteasome non-ATPase regulatory subunit 4       |
| Gene_Symbol=PSMD7 26S proteasome non-ATPase regulatory subunit 7                         |
| Gene_Symbol=PSME1 29 kDa protein                                                         |
| Gene_Symbol=PSME1 Proteasome activator complex subunit 1                                 |
| Gene_Symbol=PSME2 Proteasome activator complex subunit 2                                 |
| Gene_Symbol=PSPC1 paraspeckle protein 1                                                  |
| Gene_Symbol=PTBP1 Isoform 1 of Polypyrimidine tract-binding protein 1                    |
| Gene_Symbol=PTGES3 15 kDa protein                                                        |
| Gene_Symbol=PTGES3 19 kDa protein                                                        |
| Gene_Symbol=PTGES3 Prostaglandin E synthase 3                                            |
| Gene_Symbol=PTGFRN Prostaglandin F2 receptor negative regulator precursor                |
| Gene_Symbol=PTK7 PTK7 protein tyrosine kinase 7 isoform a variant (Fragment)             |
| Gene_Symbol=PTK7 Tyrosine-protein kinase-like 7 precursor                                |
| Gene_Symbol=PTPLAD1 Protein-tyrosine phosphatase-like A domain-containing protein 1      |
| Gene_Symbol=PTPN11 Isoform 2 of Tyrosine-protein phosphatase non-receptor type 11        |
| Gene_Symbol=PTPN12 Tyrosine-protein phosphatase non-receptor type 12                     |
| Gene_Symbol=PTPRD protein tyrosine phosphatase, receptor type, D isoform 2 precursor     |
| Gene_Symbol=PTPRF protein tyrosine phosphatase, receptor type, F isoform 2 precursor     |
| Gene_Symbol=PTPRF Receptor-type tyrosine-protein phosphatase F precursor                 |
| Gene_Symbol=PTPRG Receptor-type tyrosine-protein phosphatase gamma precursor             |
| Gene_Symbol=PTPRK Receptor-type tyrosine-protein phosphatase kappa precursor             |
| Gene_Symbol=PTPRS protein tyrosine phosphatase, receptor type, sigma isoform 2 precursor |
| Gene_Symbol=PTPRZ1 protein tyrosine phosphatase, receptor-type, zeta1 precursor          |
| Gene_Symbol=PTRF Isoform 1 of Polymerase I and transcript release factor                 |
| Gene_Symbol=PTX3 Pentraxin-related protein PTX3 precursor                                |
| Gene_Symbol=PVR Isoform Beta of Poliovirus receptor precursor                            |
| Gene_Symbol=PVR Isoform Gamma of Poliovirus receptor precursor                           |
| Gene_Symbol=PVRL1 Isoform Delta of Poliovirus receptor-related protein 1 precursor       |
| Gene_Symbol=PVRL2 Isoform Alpha of Poliovirus receptor-related protein 2 precursor       |
| Gene_Symbol=PXDN peroxidasin homolog                                                     |
| Gene_Symbol=PXDN similar to peroxidasin                                                  |
| Gene_Symbol=PYGB Glycogen phosphorylase, brain form                                      |
| Gene_Symbol=PYGL Glycogen phosphorylase, liver form                                      |
| Gene_Symbol=QARS Glutaminyl-tRNA synthetase                                              |
| Gene_Symbol=QPCT Glutaminyl-peptide cyclotransferase precursor                           |
| Gene_Symbol=QSCN6 Isoform 1 of Sulfhydryl oxidase 1 precursor                            |
| Gene_Symbol=QSCN6 Isoform 2 of Sulfhydryl oxidase 1 precursor                            |
| Gene_Symbol=QSCN6L1 78 kDa protein                                                       |
| Gene_Symbol=RAB11B Ras-related protein Rab-11B                                           |
| Gene_Symbol=RAB14 Ras-related protein Rab-14                                             |
| Gene_Symbol=RAB2A 21 kDa protein                                                         |
| Gene_Symbol=RAB7A Ras-related protein Rab-7                                              |
| Gene_Symbol=RAD23A UV excision repair protein RAD23 homolog A                            |
| Gene_Symbol=RAD23B UV excision repair protein RAD23 homolog B                            |
| Gene_Symbol=RAE1 MRNA-associated protein Mrnp 41                                         |

|                                                                                                                       |
|-----------------------------------------------------------------------------------------------------------------------|
| Gene_Symbol=RALY RNA binding protein (Fragment)                                                                       |
| Gene_Symbol=RAN 24 kDa protein                                                                                        |
| Gene_Symbol=RAN 26 kDa protein                                                                                        |
| Gene_Symbol=RAN 27 kDa protein                                                                                        |
| Gene_Symbol=RAN GTP-binding nuclear protein Ran                                                                       |
| Gene_Symbol=RANBP1 Ran-specific GTPase-activating protein                                                             |
| Gene_Symbol=RANBP2 E3 SUMO-protein ligase RanBP2                                                                      |
| Gene_Symbol=RANBP3 Isoform 1 of Ran-binding protein 3                                                                 |
| Gene_Symbol=RANBP5 127 kDa protein                                                                                    |
| Gene_Symbol=RANBP5 Importin beta-3                                                                                    |
| Gene_Symbol=RANGAP1 Ran GTPase-activating protein 1                                                                   |
| Gene_Symbol=RAP1A Ras-related protein Rap-1A precursor                                                                |
| Gene_Symbol=RAP1B Ras-related protein Rap-1b precursor                                                                |
| Gene_Symbol=RARS Isoform Complexed of Arginyl-tRNA synthetase, cytoplasmic                                            |
| Gene_Symbol=RBBP4 Histone-binding protein RBBP4                                                                       |
| Gene_Symbol=RBBP7 Histone-binding protein RBBP7                                                                       |
| Gene_Symbol=RBBP7 Retinoblastoma binding protein 7                                                                    |
| Gene_Symbol=RBM12B RNA binding motif protein 12B                                                                      |
| Gene_Symbol=RBM15 Isoform 1 of Putative RNA-binding protein 15                                                        |
| Gene_Symbol=RBM22 Pre-mRNA-splicing factor RBM22                                                                      |
| Gene_Symbol=RBM25 RNA binding motif protein 25                                                                        |
| Gene_Symbol=RBM3 Putative RNA-binding protein 3                                                                       |
| Gene_Symbol=RBM8A Isoform 1 of RNA-binding protein 8A                                                                 |
| Gene_Symbol=RBMX Heterogeneous nuclear ribonucleoprotein G                                                            |
| Gene_Symbol=RBMXL1;CCBL2 RNA binding motif protein, X-linked-like 1                                                   |
| Gene_Symbol=RBP1 Retinol-binding protein I, cellular                                                                  |
| Gene_Symbol=RCC1 regulator of chromosome condensation 1 isoform a                                                     |
| Gene_Symbol=RCC2 Protein RCC2                                                                                         |
| Gene_Symbol=RCN1 Reticulocalbin-1 precursor                                                                           |
| Gene_Symbol=RECQL ATP-dependent DNA helicase Q1                                                                       |
| Gene_Symbol=RELL1 RELL1 protein                                                                                       |
| Gene_Symbol=RFC1 Isoform 1 of Replication factor C subunit 1                                                          |
| Gene_Symbol=RFNG similar to Beta-1,3-N-acetylglucosaminyltransferase radical fringe                                   |
| Gene_Symbol=RHOA Transforming protein RhoA precursor                                                                  |
| Gene_Symbol=RHOC Rho-related GTP-binding protein RhoC precursor                                                       |
| Gene_Symbol=RNASE4 Ribonuclease 4 precursor                                                                           |
| Gene_Symbol=RNASE4;ANG Angiogenin precursor                                                                           |
| Gene_Symbol=RNASET2 Isoform 1 of Ribonuclease T2 precursor                                                            |
| Gene_Symbol=RNF40 Isoform 1 of E3 ubiquitin-protein ligase BRE1B                                                      |
| Gene_Symbol=RNH1 Ribonuclease inhibitor                                                                               |
| Gene_Symbol=RNH1 Ribonuclease/angiogenin inhibitor                                                                    |
| Gene_Symbol=RNPEP 68 kDa protein                                                                                      |
| Gene_Symbol=RNPEP Aminopeptidase B                                                                                    |
| Gene_Symbol=ROBO1 ROBO1 protein                                                                                       |
| Gene_Symbol=ROCK2 Rho-associated protein kinase 2                                                                     |
| Gene_Symbol=RP6-166C19.3;RP6-166C19.5;RP6-166C19.4;RP6-166C19.1;CT47.8;RP6-166C19.6;RP6-166C19.10;RP6-166C19.11;RP6-1 |
| Gene_Symbol=RPA1 Replication protein A 70 kDa DNA-binding subunit                                                     |
| Gene_Symbol=RPA2 Isoform 3 of Replication protein A 32 kDa subunit                                                    |
| Gene_Symbol=RPA3 Replication protein A 14 kDa subunit                                                                 |
| Gene_Symbol=RPL10A 60S ribosomal protein L10a                                                                         |
| Gene_Symbol=RPL11 Isoform 1 of 60S ribosomal protein L11                                                              |
| Gene_Symbol=RPL12 60S ribosomal protein L12                                                                           |

|                                                                                        |
|----------------------------------------------------------------------------------------|
| Gene_Symbol=RPL14 RPL14 protein                                                        |
| Gene_Symbol=RPL17 60S ribosomal protein L17                                            |
| Gene_Symbol=RPL18 60S ribosomal protein L18                                            |
| Gene_Symbol=RPL22 60S ribosomal protein L22                                            |
| Gene_Symbol=RPL23A 60S ribosomal protein L23a                                          |
| Gene_Symbol=RPL27 60S ribosomal protein L27                                            |
| Gene_Symbol=RPL30 60S ribosomal protein L30                                            |
| Gene_Symbol=RPL38 60S ribosomal protein L38                                            |
| Gene_Symbol=RPL4 60S ribosomal protein L4                                              |
| Gene_Symbol=RPL5 60S ribosomal protein L5                                              |
| Gene_Symbol=RPL8 60S ribosomal protein L8                                              |
| Gene_Symbol=RPLP0 24 kDa protein                                                       |
| Gene_Symbol=RPLP0 60S acidic ribosomal protein P0                                      |
| Gene_Symbol=RPLP1;hCG_1641617 60S acidic ribosomal protein P1                          |
| Gene_Symbol=RPLP2 60S acidic ribosomal protein P2                                      |
| Gene_Symbol=RPS10 40S ribosomal protein S10                                            |
| Gene_Symbol=RPS11 40S ribosomal protein S11                                            |
| Gene_Symbol=RPS12 40S ribosomal protein S12                                            |
| Gene_Symbol=RPS13 40S ribosomal protein S13                                            |
| Gene_Symbol=RPS14 40S ribosomal protein S14                                            |
| Gene_Symbol=RPS19 40S ribosomal protein S19                                            |
| Gene_Symbol=RPS2 40S ribosomal protein S2                                              |
| Gene_Symbol=RPS20 40S ribosomal protein S20                                            |
| Gene_Symbol=RPS21 40S ribosomal protein S21                                            |
| Gene_Symbol=RPS27A;UBC;UBB 12 kDa protein                                              |
| Gene_Symbol=RPS27A;UBC;UBB ubiquitin and ribosomal protein S27a precursor              |
| Gene_Symbol=RPS3 40S ribosomal protein S3                                              |
| Gene_Symbol=RPS3A 40S ribosomal protein S3a                                            |
| Gene_Symbol=RPS4X 40S ribosomal protein S4, X isoform                                  |
| Gene_Symbol=RPS5 40S ribosomal protein S5                                              |
| Gene_Symbol=RPS7 40S ribosomal protein S7                                              |
| Gene_Symbol=RPS8 40S ribosomal protein S8                                              |
| Gene_Symbol=RPSA;LOC388524 Ribosomal protein SA                                        |
| Gene_Symbol=RRBP1 Isoform 1 of Ribosome-binding protein 1                              |
| Gene_Symbol=RRBP1 Isoform 3 of Ribosome-binding protein 1                              |
| Gene_Symbol=RRM1 Ribonucleoside-diphosphate reductase large subunit                    |
| Gene_Symbol=RTBDN retbindin isoform 2                                                  |
| Gene_Symbol=RTN4 Isoform 1 of Reticulon-4                                              |
| Gene_Symbol=RUVBL1 Isoform 1 of RuvB-like 1                                            |
| Gene_Symbol=RUVBL2 RuvB-like 2                                                         |
| Gene_Symbol=S100A10 Protein S100-A10                                                   |
| Gene_Symbol=S100A11 Protein S100-A11                                                   |
| Gene_Symbol=SAE2 SUMO-activating enzyme subunit 2                                      |
| Gene_Symbol=SAFB Scaffold attachment factor B                                          |
| Gene_Symbol=SAFB2 Scaffold attachment factor B2                                        |
| Gene_Symbol=SARS Seryl-tRNA synthetase                                                 |
| Gene_Symbol=SART1 U4/U6.U5 tri-snRNP-associated protein 1                              |
| Gene_Symbol=SART3 Isoform 1 of Squamous cell carcinoma antigen recognized by T-cells 3 |
| Gene_Symbol=SCAMP3 Isoform 1 of Secretory carrier-associated membrane protein 3        |
| Gene_Symbol=SCARB1 Isoform 1 of Scavenger receptor class B member 1                    |
| Gene_Symbol=SCG2 Secretogranin-2 precursor                                             |
| Gene_Symbol=SCG3 Secretogranin-3 precursor                                             |
| Gene_Symbol=SCG5 Isoform 1 of Neuroendocrine protein 7B2 precursor                     |

|                                                                                           |
|-------------------------------------------------------------------------------------------|
| Gene_Symbol=SCPEP1 Isoform 1 of Retinoid-inducible serine carboxypeptidase precursor      |
| Gene_Symbol=SCUBE1 Signal peptide, CUB and EGF-like domain-containing protein 1 precursor |
| Gene_Symbol=SCYE1 37 kDa protein                                                          |
| Gene_Symbol=SCYE1 Multisynthetase complex auxiliary component p43                         |
| Gene_Symbol=SDC1 Syndecan-1 precursor                                                     |
| Gene_Symbol=SDC4 Syndecan-4 precursor                                                     |
| Gene_Symbol=SDCBP Syntenin-1                                                              |
| Gene_Symbol=SDF2 Stromal cell-derived factor 2 precursor                                  |
| Gene_Symbol=SDF2L1 Dihydropyrimidinase-like 2                                             |
| Gene_Symbol=SDF4 45 kDa calcium-binding protein precursor                                 |
| Gene_Symbol=SDPR Serum deprivation-response protein                                       |
| Gene_Symbol=SDSL Serine dehydratase-like                                                  |
| Gene_Symbol=SEC23B Protein transport protein Sec23B                                       |
| Gene_Symbol=SECTM1 Secreted and transmembrane protein 1 precursor                         |
| Gene_Symbol=SELENBP1 selenium binding protein 1                                           |
| Gene_Symbol=SEMA3A Semaphorin-3A precursor                                                |
| Gene_Symbol=SEMA3C Semaphorin-3C precursor                                                |
| Gene_Symbol=SEMA3D Semaphorin-3D precursor                                                |
| Gene_Symbol=SEMA3E Semaphorin-3E precursor                                                |
| Gene_Symbol=SEMA3G Semaphorin-3G precursor                                                |
| Gene_Symbol=SEMA4B semaphorin 4B precursor                                                |
| Gene_Symbol=SEMA4C Semaphorin-4C precursor                                                |
| Gene_Symbol=SEMA4D Semaphorin-4D precursor                                                |
| Gene_Symbol=SEMA7A Semaphorin-7A precursor                                                |
| Gene_Symbol=SEP15 15 kDa selenoprotein isoform 1 precursor                                |
| Gene_Symbol=SEPHS1 Selenide, water dikinase 1                                             |
| Gene_Symbol=SEPT2 Septin-2                                                                |
| Gene_Symbol=SEPT7 Isoform 1 of Septin-7                                                   |
| Gene_Symbol=SEPT9 Isoform 1 of Septin-9                                                   |
| Gene_Symbol=SEPT9 Isoform 3 of Septin-9                                                   |
| Gene_Symbol=SEPT9 Isoform 5 of Septin-9                                                   |
| Gene_Symbol=SERBP1 Isoform 1 of Plasminogen activator inhibitor 1 RNA-binding protein     |
| Gene_Symbol=SERBP1 Isoform 4 of Plasminogen activator inhibitor 1 RNA-binding protein     |
| Gene_Symbol=SERPINA1 Alpha-1-antitrypsin precursor                                        |
| Gene_Symbol=SERPINB1 Leukocyte elastase inhibitor                                         |
| Gene_Symbol=SERPINB2 Plasminogen activator inhibitor 2 precursor                          |
| Gene_Symbol=SERPINB5 Serpin B5 precursor                                                  |
| Gene_Symbol=SERPINB9 Serpin B9                                                            |
| Gene_Symbol=SERPINE2 Glia-derived nexin precursor                                         |
| Gene_Symbol=SERPINF1 Pigment epithelium-derived factor precursor                          |
| Gene_Symbol=SERPING1 Plasma protease C1 inhibitor precursor                               |
| Gene_Symbol=SERPINH1 Serpin H1 precursor                                                  |
| Gene_Symbol=SERPINI1 Neuroserpin precursor                                                |
| Gene_Symbol=SET Isoform 1 of Protein SET                                                  |
| Gene_Symbol=SET Isoform 2 of Protein SET                                                  |
| Gene_Symbol=SEZ6L2 Seizure 6-like protein 2                                               |
| Gene_Symbol=SEZ6L2 Type I transmembrane receptor precursor                                |
| Gene_Symbol=SF1 Isoform 5 of Splicing factor 1                                            |
| Gene_Symbol=SF3A1 Splicing factor 3 subunit 1                                             |
| Gene_Symbol=SF3A2 SF3A2 protein (Fragment)                                                |
| Gene_Symbol=SF3A3 Splicing factor 3A subunit 3                                            |
| Gene_Symbol=SF3B1 Splicing factor 3B subunit 1                                            |

|                                                                                                                                |
|--------------------------------------------------------------------------------------------------------------------------------|
| Gene_Symbol=SF3B2 splicing factor 3B subunit 2                                                                                 |
| Gene_Symbol=SF3B3 Isoform 1 of Splicing factor 3B subunit 3                                                                    |
| Gene_Symbol=SF3B4 Splicing factor 3B subunit 4                                                                                 |
| Gene_Symbol=SF3B5 Splicing factor 3B subunit 5                                                                                 |
| Gene_Symbol=SFN Isoform 1 of 14-3-3 protein sigma                                                                              |
| Gene_Symbol=SFPQ Isoform Long of Splicing factor, proline- and glutamine-rich                                                  |
| Gene_Symbol=SFRP1 Secreted frizzled-related protein 1 precursor                                                                |
| Gene_Symbol=SFRS1 Isoform ASF-1 of Splicing factor, arginine/serine-rich 1                                                     |
| Gene_Symbol=SFRS1 Isoform ASF-2 of Splicing factor, arginine/serine-rich 1                                                     |
| Gene_Symbol=SFRS10 Isoform 1 of Arginine/serine-rich-splicing factor 10                                                        |
| Gene_Symbol=SFRS2 Splicing factor, arginine/serine-rich 2                                                                      |
| Gene_Symbol=SFRS3 Splicing factor, arginine/serine-rich 3                                                                      |
| Gene_Symbol=SFRS7 Isoform 1 of Splicing factor, arginine/serine-rich 7                                                         |
| Gene_Symbol=SFRS9 Splicing factor, arginine/serine-rich 9                                                                      |
| Gene_Symbol=SGCE Isoform SGCE-1 of Epsilon-sarcoglycan precursor                                                               |
| Gene_Symbol=SGTA Small glutamine-rich tetratricopeptide repeat-containing protein A                                            |
| Gene_Symbol=SH3BGR13 Hypothetical protein                                                                                      |
| Gene_Symbol=SHC1 SHC (Src homology 2 domain containing) transforming protein 1                                                 |
| Gene_Symbol=SHH Sonic hedgehog protein precursor                                                                               |
| Gene_Symbol=SHMT2 Serine hydroxymethyltransferase, mitochondrial precursor                                                     |
| Gene_Symbol=SIAE Isoform 1 of Sialate O-acetyltransferase precursor                                                            |
| Gene_Symbol=SIAHBP1 fuse-binding protein-interacting repressor isoform a                                                       |
| Gene_Symbol=SIAHBP1 SIAHBP1 protein                                                                                            |
| Gene_Symbol=SIL1 Nucleotide exchange factor SIL1 precursor                                                                     |
| Gene_Symbol=SKIV2L2 Superkiller viralicidic activity 2-like 2                                                                  |
| Gene_Symbol=SKP1A Isoform 1 of S-phase kinase-associated protein 1A                                                            |
| Gene_Symbol=SLC1A5 Neutral amino acid transporter B                                                                            |
| Gene_Symbol=SLC25A13 Mitochondrial aspartate-glutamate carrier protein                                                         |
| Gene_Symbol=SLC2A1 Solute carrier family 2, facilitated glucose transporter member 1                                           |
| Gene_Symbol=SLC39A10 Solute carrier family 39 (Zinc transporter), member 10                                                    |
| Gene_Symbol=SLC3A2 4F2 cell-surface antigen heavy chain                                                                        |
| Gene_Symbol=SLC3A2 solute carrier family 3 (activators of dibasic and neutral amino acid transport), member 2 isoform d        |
| Gene_Symbol=SLC44A1 Isoform 1 of Choline transporter-like protein 1                                                            |
| Gene_Symbol=SLIT3 Isoform 1 of Slit homolog 3 protein precursor                                                                |
| Gene_Symbol=SLITRK6 Isoform 1 of SLIT and NTRK-like protein 6 precursor                                                        |
| Gene_Symbol=SLPI Antileukoproteinase precursor                                                                                 |
| Gene_Symbol=SMARCA5 SWI/SNF-related matrix-associated actin-dependent regulator of chromatin subfamily A member 5              |
| Gene_Symbol=SMARCC1 SWI/SNF related, matrix associated, actin dependent regulator of chromatin, subfamily c, member 1          |
| Gene_Symbol=SMARCC1 SWI/SNF-related matrix-associated actin-dependent regulator of chromatin subfamily C member 1              |
| Gene_Symbol=SMARCC2 Isoform 2 of SWI/SNF-related matrix-associated actin-dependent regulator of chromatin subfamily C member 2 |
| Gene_Symbol=SMARCE1 Protein                                                                                                    |
| Gene_Symbol=SMC1A Structural maintenance of chromosomes protein 1A                                                             |
| Gene_Symbol=SMC3 Structural maintenance of chromosomes protein 3                                                               |
| Gene_Symbol=SMOC1 Isoform 1 of SPARC-related modular calcium-binding protein 1 precursor                                       |
| Gene_Symbol=SMOC1 Isoform 2 of SPARC-related modular calcium-binding protein 1 precursor                                       |
| Gene_Symbol=SMOC2 Isoform 1 of SPARC-related modular calcium-binding protein 2 precursor                                       |
| Gene_Symbol=SMOC2 Isoform 2 of SPARC-related modular calcium-binding protein 2 precursor                                       |
| Gene_Symbol=SMS Spermine synthase                                                                                              |
| Gene_Symbol=SND1 Staphylococcal nuclease domain-containing protein 1                                                           |
| Gene_Symbol=SNRP70 Isoform 1 of U1 small nuclear ribonucleoprotein 70 kDa                                                      |
| Gene_Symbol=SNRPA U1 small nuclear ribonucleoprotein A                                                                         |
| Gene_Symbol=SNRPB Isoform SM-B' of Small nuclear ribonucleoprotein-associated proteins B and B'                                |
| Gene_Symbol=SNRPB2 U2 small nuclear ribonucleoprotein B"                                                                       |

|                                                                                            |
|--------------------------------------------------------------------------------------------|
| Gene_Symbol=SNRPC U1 small nuclear ribonucleoprotein C                                     |
| Gene_Symbol=SNRPD1 Small nuclear ribonucleoprotein Sm D1                                   |
| Gene_Symbol=SNRPD2 Small nuclear ribonucleoprotein Sm D2                                   |
| Gene_Symbol=SNRPD3 Small nuclear ribonucleoprotein Sm D3                                   |
| Gene_Symbol=SNRPE Small nuclear ribonucleoprotein E                                        |
| Gene_Symbol=SNRPG Small nuclear ribonucleoprotein G                                        |
| Gene_Symbol=SNW1 SNW domain-containing protein 1                                           |
| Gene_Symbol=SOD1 16 kDa protein                                                            |
| Gene_Symbol=SOD2 Superoxide dismutase [Mn], mitochondrial precursor                        |
| Gene_Symbol=SON Isoform J of SON protein                                                   |
| Gene_Symbol=SORD Sorbitol dehydrogenase                                                    |
| Gene_Symbol=SORL1 Sortilin-related receptor precursor                                      |
| Gene_Symbol=SORT1 Sortilin precursor                                                       |
| Gene_Symbol=SPINT1 Isoform 1 of Kunitz-type protease inhibitor 1 precursor                 |
| Gene_Symbol=SPINT1 Isoform 2 of Kunitz-type protease inhibitor 1 precursor                 |
| Gene_Symbol=SPOCK1 Testican-1 precursor                                                    |
| Gene_Symbol=SPOCK2 Testican-2 precursor                                                    |
| Gene_Symbol=SPP1 Isoform A of Osteopontin precursor                                        |
| Gene_Symbol=SPP1 secreted phosphoprotein 1 isoform b                                       |
| Gene_Symbol=SPTAN1 Isoform 1 of Spectrin alpha chain, brain                                |
| Gene_Symbol=SPTAN1 Isoform 2 of Spectrin alpha chain, brain                                |
| Gene_Symbol=SPTAN1 Isoform 3 of Spectrin alpha chain, brain                                |
| Gene_Symbol=SPTBN1 Isoform Long of Spectrin beta chain, brain 1                            |
| Gene_Symbol=SQSTM1 Isoform 1 of Sequestosome-1                                             |
| Gene_Symbol=SR140 Isoform 1 of U2-associated protein SR140                                 |
| Gene_Symbol=SRGN Secretory granule proteoglycan core protein precursor                     |
| Gene_Symbol=SRP14 8 kDa protein                                                            |
| Gene_Symbol=SRP14 Signal recognition particle 14 kDa protein                               |
| Gene_Symbol=SRP54 Signal recognition particle 54 kDa protein                               |
| Gene_Symbol=SRP9;hCG_1781062 Signal recognition particle 9 kDa protein                     |
| Gene_Symbol=SRPX Isoform 1 of Sushi repeat-containing protein SRPX precursor               |
| Gene_Symbol=SRPX2 Sushi repeat-containing protein SRPX2 precursor                          |
| Gene_Symbol=SRRM2 Isoform 1 of Serine/arginine repetitive matrix protein 2                 |
| Gene_Symbol=SRXN1;SCRT2 Sulfiredoxin-1                                                     |
| Gene_Symbol=SSB Lupus La protein                                                           |
| Gene_Symbol=SSRP1 FACT complex subunit SSRP1                                               |
| Gene_Symbol=ST13 Hsc70-interacting protein                                                 |
| Gene_Symbol=ST14 Suppressor of tumorigenicity protein 14                                   |
| Gene_Symbol=ST3GAL1 CMP-N-acetylneuraminic acid-beta-galactosyltransferase                 |
| Gene_Symbol=ST6GAL1 CMP-N-acetylneuraminic acid-beta-galactosyltransferase                 |
| Gene_Symbol=ST8SIA4 CMP-N-acetylneuraminic acid-poly-alpha-2,8-sialyltransferase           |
| Gene_Symbol=STAU1 Isoform Long of Double-stranded RNA-binding protein Staufen homolog 1    |
| Gene_Symbol=STC1 Stanniocalcin-1 precursor                                                 |
| Gene_Symbol=STC2 Stanniocalcin-2 precursor                                                 |
| Gene_Symbol=STCH Stress 70 protein chaperone microsome-associated 60 kDa protein precursor |
| Gene_Symbol=STIP1 Stress-induced-phosphoprotein 1                                          |
| Gene_Symbol=STMN1 Stathmin                                                                 |
| Gene_Symbol=STMN1 Stathmin 1                                                               |
| Gene_Symbol=STRAP Serine-threonine kinase receptor-associated protein                      |
| Gene_Symbol=STXBP2 Syntaxin-binding protein 2                                              |
| Gene_Symbol=SUB1 Activated RNA polymerase II transcriptional coactivator p15               |
| Gene_Symbol=SUMF2 Isoform 1 of Sulfatase-modifying factor 2 precursor                      |
| Gene_Symbol=SUMF2 Isoform 3 of Sulfatase-modifying factor 2 precursor                      |

|                                                                                       |
|---------------------------------------------------------------------------------------|
| Gene_Symbol=SUPT16H FACT complex subunit SPT16                                        |
| Gene_Symbol=SUPT6H 199 kDa protein                                                    |
| Gene_Symbol=SVEP1 polydom                                                             |
| Gene_Symbol=SWAP70 Switch-associated protein 70                                       |
| Gene_Symbol=SYNCRIP Isoform 1 of Heterogeneous nuclear ribonucleoprotein Q            |
| Gene_Symbol=SYNE2 Isoform 1 of Nesprin-2                                              |
| Gene_Symbol=TACC2 Transforming, acidic coiled-coil containing protein 2               |
| Gene_Symbol=TACSTD1 Tumor-associated calcium signal transducer 1 precursor            |
| Gene_Symbol=TAF15 Isoform Short of TATA-binding protein-associated factor 2N          |
| Gene_Symbol=TAGLN2;CCDC19 24 kDa protein                                              |
| Gene_Symbol=TAGLN2;CCDC19 Transgelin-2                                                |
| Gene_Symbol=TALDO1 TALDO1 protein                                                     |
| Gene_Symbol=TALDO1 Transaldolase                                                      |
| Gene_Symbol=TARDBP TAR DNA-binding protein 43                                         |
| Gene_Symbol=TARS Threonyl-tRNA synthetase, cytoplasmic                                |
| Gene_Symbol=TBCA Tubulin-specific chaperone A                                         |
| Gene_Symbol=TBCB Tubulin-specific chaperone B                                         |
| Gene_Symbol=TCEB1 Transcription elongation factor B polypeptide 1                     |
| Gene_Symbol=TCEB2 Transcription elongation factor B polypeptide 2                     |
| Gene_Symbol=TCERG1 Transcription elongation regulator 1                               |
| Gene_Symbol=TCN2 Transcobalamin-2 precursor                                           |
| Gene_Symbol=TCP1 T-complex protein 1 subunit alpha                                    |
| Gene_Symbol=TFG Protein TFG                                                           |
| Gene_Symbol=TFPI Isoform Alpha of Tissue factor pathway inhibitor precursor           |
| Gene_Symbol=TFPI2 Tissue factor pathway inhibitor 2 precursor                         |
| Gene_Symbol=TFRC Transferrin receptor protein 1                                       |
| Gene_Symbol=TGFB1 Transforming growth factor beta-1 precursor                         |
| Gene_Symbol=TGFB2 Isoform A of Transforming growth factor beta-2 precursor            |
| Gene_Symbol=TGFB1 Transforming growth factor-beta-induced protein ig-h3 precursor     |
| Gene_Symbol=TGFBR3 transforming growth factor, beta receptor III                      |
| Gene_Symbol=TGM2 Isoform 1 of Protein-glutamine gamma-glutamyltransferase 2           |
| Gene_Symbol=THBS1 Thrombospondin-1 precursor                                          |
| Gene_Symbol=THBS3 Thrombospondin-3 precursor                                          |
| Gene_Symbol=THOC4 THO complex subunit 4                                               |
| Gene_Symbol=THOP1 Thimet oligopeptidase                                               |
| Gene_Symbol=THRAP3 Thyroid hormone receptor-associated protein 3                      |
| Gene_Symbol=THSD4 thrombospondin, type I, domain containing 4                         |
| Gene_Symbol=TIAL1 Nucleolysin TIAR                                                    |
| Gene_Symbol=TIMM8A Mitochondrial import inner membrane translocase subunit Tim8 A     |
| Gene_Symbol=TIMP1 Metalloproteinase inhibitor 1 precursor                             |
| Gene_Symbol=TIMP2 22 kDa protein                                                      |
| Gene_Symbol=TIMP2 Metalloproteinase inhibitor 2 precursor                             |
| Gene_Symbol=TINAGL1 Isoform 1 of Tubulointerstitial nephritis antigen-like precursor  |
| Gene_Symbol=TKT Transketolase                                                         |
| Gene_Symbol=TKT Transketolase variant (Fragment)                                      |
| Gene_Symbol=TLN1 271 kDa protein                                                      |
| Gene_Symbol=TLN1 Talin-1                                                              |
| Gene_Symbol=TMEM132A transmembrane protein 132A isoform b                             |
| Gene_Symbol=TMEM137;RBM14 Isoform 1 of RNA-binding protein 14                         |
| Gene_Symbol=TMEM4 Isoform 1 of MIR-interacting saposin-like protein precursor         |
| Gene_Symbol=TMOD3 Tropomodulin-3                                                      |
| Gene_Symbol=TMPO Isoform Beta of Lamina-associated polypeptide 2, isoforms beta/gamma |



|                                                                                       |
|---------------------------------------------------------------------------------------|
| Gene_Symbol=TMPO Lamina-associated polypeptide 2 isoform alpha                        |
| Gene_Symbol=TNC Isoform 1 of Tenascin precursor                                       |
| Gene_Symbol=TNFRSF11B Tumor necrosis factor receptor superfamily member 11B precursor |
| Gene_Symbol=TNFRSF19L Tumor necrosis factor receptor superfamily member 19L precursor |
| Gene_Symbol=TNFRSF1A Tumor necrosis factor receptor superfamily member 1A precursor   |
| Gene_Symbol=TNPO1 Transportin 1 (Importin beta-)2                                     |
| Gene_Symbol=TNPO2 Transportin 2                                                       |
| Gene_Symbol=TOMM70A Mitochondrial precursor proteins import receptor                  |
| Gene_Symbol=TOP1 DNA topoisomerase 1                                                  |
| Gene_Symbol=TOP2A 183 kDa protein                                                     |
| Gene_Symbol=TOR1B Torsin B precursor                                                  |
| Gene_Symbol=TOR3A Isoform 1 of Torsin-3A precursor                                    |
| Gene_Symbol=TP53BP1 Isoform 1 of Tumor suppressor p53-binding protein 1               |
| Gene_Symbol=TPD52 Tumor protein D52                                                   |
| Gene_Symbol=TPD52L1 Tumor protein D53                                                 |
| Gene_Symbol=TPD52L2 24 kDa protein                                                    |
| Gene_Symbol=TPD52L2 Isoform 1 of Tumor protein D54                                    |
| Gene_Symbol=TPI1 Triosephosphate isomerase 1 variant                                  |
| Gene_Symbol=TPM1 Isoform 1 of Tropomyosin-1 alpha chain                               |
| Gene_Symbol=TPM2 Isoform 2 of Tropomyosin beta chain                                  |
| Gene_Symbol=TPM3 29 kDa protein                                                       |
| Gene_Symbol=TPM3 tropomyosin 3 isoform 4                                              |
| Gene_Symbol=TPM4 Isoform 1 of Tropomyosin alpha-4 chain                               |
| Gene_Symbol=TPP1 Isoform 1 of Tripeptidyl-peptidase 1 precursor                       |
| Gene_Symbol=TPP2 Tripeptidyl peptidase II                                             |
| Gene_Symbol=TPR Nucleoprotein TPR                                                     |
| Gene_Symbol=TPT1 Tumor protein, translationally-controlled 1                          |
| Gene_Symbol=TPX2 Hepatocellular carcinoma-associated antigen 90                       |
| Gene_Symbol=TRAP1 Heat shock protein 75 kDa, mitochondrial precursor                  |
| Gene_Symbol=TRIM28 Isoform 1 of Transcription intermediary factor 1-beta              |
| Gene_Symbol=TRIM72 Isoform 1 of Tripartite motif-containing protein 72                |
| Gene_Symbol=TRIP11 Thyroid receptor-interacting protein 11                            |
| Gene_Symbol=TROVE2 Isoform Long of 60 kDa SS-A/Ro ribonucleoprotein                   |
| Gene_Symbol=TSKU Tsukushi precursor                                                   |
| Gene_Symbol=TSN Translin                                                              |
| Gene_Symbol=TSPAN5 Tetraspanin-5                                                      |
| Gene_Symbol=TTLL12 Tubulin--tyrosine ligase-like protein 12                           |
| Gene_Symbol=TUBA1A Tubulin alpha-3 chain                                              |
| Gene_Symbol=TUBA1B 46 kDa protein                                                     |
| Gene_Symbol=TUBA1B Tubulin alpha-ubiquitous chain                                     |
| Gene_Symbol=TUBA1C Tubulin alpha-6 chain                                              |
| Gene_Symbol=TUBB Tubulin beta chain                                                   |
| Gene_Symbol=TUBB2A Tubulin beta-2A chain                                              |
| Gene_Symbol=TUBB2B Tubulin beta-2B chain                                              |
| Gene_Symbol=TUBB2C Tubulin beta-2C chain                                              |
| Gene_Symbol=TUBB3 Tubulin beta-3 chain                                                |
| Gene_Symbol=TUBB4 Tubulin beta-4 chain                                                |
| Gene_Symbol=TUBB6 46 kDa protein                                                      |
| Gene_Symbol=TUBB6 TUBB6 protein                                                       |
| Gene_Symbol=TWF1 twinfilin 1                                                          |
| Gene_Symbol=TWF2 Twinfilin-2                                                          |
| Gene_Symbol=TWSG1 Isoform 1 of Twisted gastrulation protein homolog 1 precursor       |

|                                                                                                   |
|---------------------------------------------------------------------------------------------------|
| Gene_Symbol=TXN Thioredoxin                                                                       |
| Gene_Symbol=TXNDC12 Thioredoxin domain-containing protein 12 precursor                            |
| Gene_Symbol=TXNDC4 Thioredoxin domain-containing protein 4 precursor                              |
| Gene_Symbol=TXNDC5;MUTED thioredoxin domain containing 5 isoform 2                                |
| Gene_Symbol=TXNL1 Thioredoxin-like protein 1                                                      |
| Gene_Symbol=TXNL2 Thioredoxin-like protein 2                                                      |
| Gene_Symbol=TXNL5 Thioredoxin-like protein 5                                                      |
| Gene_Symbol=TXNRD1 CDNA FLJ46672 fis, clone TRACH3009008, highly similar to Thioredoxin reductase |
| Gene_Symbol=U2AF1 Splicing factor U2AF 35 kDa subunit                                             |
| Gene_Symbol=U2AF2 54 kDa protein                                                                  |
| Gene_Symbol=U2AF2 Splicing factor U2AF 65 kDa subunit                                             |
| Gene_Symbol=UBA52 ubiquitin and ribosomal protein L40 precursor                                   |
| Gene_Symbol=UBAP2L Isoform 3 of Ubiquitin-associated protein 2-like                               |
| Gene_Symbol=UBAP2L Ubiquitin associated protein 2-like                                            |
| Gene_Symbol=UBE1 Ubiquitin-activating enzyme E1                                                   |
| Gene_Symbol=UBE1C NEDD8-activating enzyme E1 catalytic subunit                                    |
| Gene_Symbol=UBE2I SUMO-conjugating enzyme UBC9                                                    |
| Gene_Symbol=UBE2L3 Ubiquitin-conjugating enzyme E2 L3                                             |
| Gene_Symbol=UBE2N Ubiquitin-conjugating enzyme E2 N                                               |
| Gene_Symbol=UBE2V1;Kua-UEV Isoform 1 of Ubiquitin-conjugating enzyme E2 variant 1                 |
| Gene_Symbol=UBE2V2 16 kDa protein                                                                 |
| Gene_Symbol=UBQLN1 Isoform 2 of Ubiquilin-1                                                       |
| Gene_Symbol=UBQLN4 Ubiquilin-4                                                                    |
| Gene_Symbol=UCHL1 Ubiquitin carboxyl-terminal hydrolase isozyme L1                                |
| Gene_Symbol=UCHL5 Isoform 2 of Ubiquitin carboxyl-terminal hydrolase isozyme L5                   |
| Gene_Symbol=UFC1 Ufm1-conjugating enzyme 1                                                        |
| Gene_Symbol=UFD1L ubiquitin fusion degradation 1-like isoform B                                   |
| Gene_Symbol=UGCGL1 UDP-glucose ceramide glucosyltransferase-like 1 isoform 1                      |
| Gene_Symbol=UGCGL1 UDP-glucose:glycoprotein glucosyltransferase 1 precursor                       |
| Gene_Symbol=UGDH UDP-glucose 6-dehydrogenase                                                      |
| Gene_Symbol=UGP1 UTP--glucose-1-phosphate uridylyltransferase 1                                   |
| Gene_Symbol=UNQ2541 MSFL2541                                                                      |
| Gene_Symbol=UPF1 Isoform 1 of Regulator of nonsense transcripts 1                                 |
| Gene_Symbol=UROD Uroporphyrinogen decarboxylase                                                   |
| Gene_Symbol=USP14 Ubiquitin carboxyl-terminal hydrolase 14                                        |
| Gene_Symbol=USP15 Isoform 1 of Ubiquitin carboxyl-terminal hydrolase 15                           |
| Gene_Symbol=USP5 Isoform Long of Ubiquitin carboxyl-terminal hydrolase 5                          |
| Gene_Symbol=USP5 Isoform Short of Ubiquitin carboxyl-terminal hydrolase 5                         |
| Gene_Symbol=USP7 Ubiquitin carboxyl-terminal hydrolase 7                                          |
| Gene_Symbol=USP7 Ubiquitin-specific protease 7 isoform                                            |
| Gene_Symbol=UTP14A Isoform 1 of U3 small nucleolar RNA-associated protein 14 homolog A            |
| Gene_Symbol=UXS1 Isoform 2 of UDP-glucuronic acid decarboxylase 1                                 |
| Gene_Symbol=VAPA 14 kDa protein                                                                   |
| Gene_Symbol=VAPA Vesicle-associated membrane protein-associated protein A                         |
| Gene_Symbol=VAR5 Valyl-tRNA synthetase                                                            |
| Gene_Symbol=VASN Vasorin precursor                                                                |
| Gene_Symbol=VAT1 Synaptic vesicle membrane protein VAT-1 homolog                                  |
| Gene_Symbol=VBP1 Von Hippel-Lindau binding protein 1                                              |
| Gene_Symbol=VCAN Isoform V0 of Versican core protein precursor                                    |
| Gene_Symbol=VCL Isoform 1 of Vinculin                                                             |
| Gene_Symbol=VCL Isoform 2 of Vinculin                                                             |
| Gene_Symbol=VCP Transitional endoplasmic reticulum ATPase                                         |
| Gene_Symbol=VEGFC Vascular endothelial growth factor C precursor                                  |

|                                                                                   |
|-----------------------------------------------------------------------------------|
| Gene_Symbol=VGF VGF nerve growth factor inducible precursor                       |
| Gene_Symbol=VIL1 Villin-1                                                         |
| Gene_Symbol=VIL2 Ezrin                                                            |
| Gene_Symbol=VIM Vimentin                                                          |
| Gene_Symbol=VISA Isoform 1 of Mitochondrial antiviral-signaling protein           |
| Gene_Symbol=VIT Hypothetical protein VIT (vitrin)                                 |
| Gene_Symbol=VPS29 Isoform 1 of Vacuolar protein sorting-associated protein 29     |
| Gene_Symbol=VPS35 Vacuolar protein sorting-associated protein 35                  |
| Gene_Symbol=VSNL1 Visinin-like protein 1                                          |
| Gene_Symbol=VWA1 von Willebrand factor A domain-related protein isoform 1         |
| Gene_Symbol=VWA2 von Willebrand factor A domain-containing protein 2              |
| Gene_Symbol=WARS tryptophanyl-tRNA synthetase isoform b                           |
| Gene_Symbol=WARS Tryptophanyl-tRNA synthetase, cytoplasmic                        |
| Gene_Symbol=WDR1 Isoform 1 of WD repeat protein 1                                 |
| Gene_Symbol=WDR1 Isoform 2 of WD repeat protein 1                                 |
| Gene_Symbol=WDR61 WD repeat protein 61                                            |
| Gene_Symbol=WDR77 Methylosome protein 50                                          |
| Gene_Symbol=WFDC2 Isoform 1 of WAP four-disulfide core domain protein 2 precursor |
| Gene_Symbol=WIF1 Wnt inhibitory factor 1 precursor                                |
| Gene_Symbol=WISP2 WNT1-inducible-signaling pathway protein 2 precursor            |
| Gene_Symbol=WNT5A Protein Wnt-5a precursor                                        |
| Gene_Symbol=XPO1 Exportin-1                                                       |
| Gene_Symbol=XRCC5 ATP-dependent DNA helicase 2 subunit 2                          |
| Gene_Symbol=XRCC6 70 kDa protein                                                  |
| Gene_Symbol=XTP3TPA CDNA: FLJ21190 fis, clone CAS12333                            |
| Gene_Symbol=XYLT1 Xylosyltransferase 1                                            |
| Gene_Symbol=XYLT2 Isoform 1 of Xylosyltransferase 2                               |
| Gene_Symbol=YAP1 YAP1 protein                                                     |
| Gene_Symbol=YARS Tyrosyl-tRNA synthetase, cytoplasmic                             |
| Gene_Symbol=YBX1 35 kDa protein                                                   |
| Gene_Symbol=YBX1 Nuclease sensitive element binding protein-1                     |
| Gene_Symbol=YBX1 Nuclease sensitive element-binding protein 1                     |
| Gene_Symbol=YES1 Proto-oncogene tyrosine-protein kinase Yes                       |
| Gene_Symbol=YKT6 Synaptobrevin homolog YKT6                                       |
| Gene_Symbol=YWHAB Isoform Long of 14-3-3 protein beta/alpha                       |
| Gene_Symbol=YWHAE 14-3-3 protein epsilon                                          |
| Gene_Symbol=YWHAG 14-3-3 protein gamma                                            |
| Gene_Symbol=YWHAH 14-3-3 protein eta                                              |
| Gene_Symbol=YWHAQ 14-3-3 protein theta                                            |
| Gene_Symbol=YWHAZ 14-3-3 protein zeta/delta                                       |
| Gene_Symbol=ZFR 117 kDa protein                                                   |
| Gene_Symbol=ZNF207 Isoform 1 of Zinc finger protein 207                           |
| Gene_Symbol=ZNF207 Isoform 3 of Zinc finger protein 207                           |

## Electrometry in the CM o

| Number of similar matches |
|---------------------------|
| 1                         |
| 1                         |
| 1                         |
| 1                         |
| 1                         |
| 1                         |
| 1                         |
| 1                         |
| 1                         |
| 1                         |
| 1                         |
| 1                         |
| 1                         |
| 1                         |
| 1                         |
| 1                         |
| 2                         |
| 1                         |
| 1                         |
| 1                         |
| 1                         |
| 1                         |
| 1                         |
| 1                         |
| 1                         |
| 1                         |
| 1                         |
| 1                         |
| 1                         |
| 8                         |
| 1                         |
| 1                         |
| 1                         |
| 2                         |
| 1                         |
| 4                         |
| 2                         |
| 2                         |
| 1                         |
| 1                         |
| 1                         |
| 1                         |
| 1                         |
| 1                         |
| 1                         |
| 1                         |
| 1                         |
| 1                         |
| 1                         |
| 1                         |
| 1                         |
| 1                         |
| 1                         |
| 1                         |
| 1                         |
| 1                         |
| 1                         |
| 1                         |
| 1                         |
| 1                         |
| 1                         |
| 1                         |
| 1                         |
| 1                         |
| 3                         |
| 1                         |
| 1                         |

|   |
|---|
| 1 |
| 1 |
| 1 |
| 1 |
| 1 |
| 1 |
| 2 |
| 2 |
| 1 |
| 2 |
| 1 |
| 1 |
| 1 |
| 1 |
| 1 |
| 1 |
| 3 |
| 1 |
| 1 |
| 1 |
| 1 |
| 1 |
| 2 |
| 1 |
| 1 |
| 1 |
| 1 |
| 1 |
| 1 |
| 1 |
| 1 |
| 1 |
| 1 |
| 2 |
| 1 |
| 2 |
| 1 |
| 1 |
| 1 |
| 1 |
| 1 |
| 1 |
| 1 |
| 1 |
| 1 |
| 1 |
| 1 |
| 1 |
| 1 |
| 1 |
| 2 |
| 4 |
| 1 |
| 3 |
| 2 |
| 1 |
| 1 |
| 1 |
| 1 |
| 2 |
| 3 |
| 2 |

|   |
|---|
| 2 |
| 2 |
| 1 |
| 1 |
| 1 |
| 2 |
| 1 |
| 3 |
| 1 |
| 1 |
| 3 |
| 2 |
| 1 |
| 1 |
| 1 |
| 1 |
| 2 |
| 1 |
| 1 |
| 2 |
| 1 |
| 1 |
| 1 |
| 1 |
| 2 |
| 1 |
| 1 |
| 2 |
| 1 |
| 2 |
| 2 |
| 1 |
| 1 |
| 5 |
| 1 |
| 1 |
| 1 |
| 1 |
| 1 |
| 1 |
| 1 |
| 4 |
| 1 |
| 1 |
| 1 |
| 2 |
| 3 |
| 2 |
| 1 |
| 1 |
| 1 |
| 1 |
| 2 |

|   |
|---|
| 2 |
| 1 |
| 2 |
| 1 |
| 1 |
| 2 |
| 1 |
| 1 |
| 1 |
| 1 |
| 1 |
| 1 |
| 1 |
| 1 |
| 1 |
| 1 |
| 1 |
| 1 |
| 2 |
| 1 |
| 1 |
| 1 |
| 2 |
| 1 |
| 2 |
| 2 |
| 1 |
| 1 |
| 1 |
| 1 |
| 1 |
| 1 |
| 1 |
| 1 |
| 1 |
| 1 |
| 3 |
| 2 |
| 1 |
| 1 |
| 3 |
| 1 |
| 1 |
| 1 |
| 1 |
| 1 |
| 1 |
| 1 |
| 1 |
| 1 |
| 2 |
| 1 |
| 1 |
| 1 |
| 1 |
| 1 |
| 2 |
| 1 |
| 1 |

|   |
|---|
| 5 |
| 1 |
| 2 |
| 2 |
| 1 |
| 1 |
| 1 |
| 1 |
| 1 |
| 1 |
| 1 |
| 1 |
| 3 |
| 1 |
| 2 |
| 1 |
| 2 |
| 3 |
| 1 |
| 1 |
| 2 |
| 7 |
| 2 |
| 1 |
| 1 |
| 1 |
| 1 |
| 1 |
| 1 |
| 2 |
| 3 |
| 1 |
| 4 |
| 5 |
| 7 |
| 2 |
| 1 |
| 1 |
| 1 |
| 1 |
| 1 |
| 1 |
| 1 |
| 1 |
| 1 |
| 1 |
| 3 |
| 1 |
| 1 |
| 1 |
| 1 |
| 2 |
| 1 |
| 1 |
| 4 |











|   |
|---|
| 1 |
| 2 |
| 1 |
| 1 |
| 2 |
| 3 |
| 1 |
| 1 |
| 3 |
| 1 |
| 2 |
| 1 |
| 1 |
| 1 |
| 1 |
| 1 |
| 2 |
| 2 |
| 1 |
| 1 |
| 1 |
| 1 |
| 1 |
| 1 |
| 2 |
| 1 |
| 4 |
| 1 |
| 1 |
| 1 |
| 1 |
| 1 |
| 1 |
| 1 |
| 1 |
| 1 |
| 1 |
| 2 |
| 1 |
| 1 |
| 1 |
| 1 |
| 1 |
| 1 |
| 1 |
| 2 |
| 1 |
| 1 |
| 2 |
| 2 |
| 1 |
| 2 |









|    |
|----|
| 1  |
| 1  |
| 2  |
| 1  |
| 1  |
| 3  |
| 2  |
| 1  |
| 1  |
| 2  |
| 1  |
| 1  |
| 1  |
| 1  |
| 1  |
| 1  |
| 1  |
| 2  |
| 2  |
| 1  |
| 5  |
| 1  |
| 3  |
| 1  |
| 1  |
| 1  |
| 2  |
| 1  |
| 1  |
| 3  |
| 1  |
| 1  |
| 1  |
| 1  |
| 1  |
| 1  |
| 2  |
| 1  |
| 1  |
| 1  |
| 2  |
| 1  |
| 1  |
| 2  |
| 1  |
| 2  |
| 1  |
| 1  |
| 1  |
| 10 |
| 1  |
| 2  |
| 2  |
| 1  |
| 1  |
| 1  |
| 1  |

|    |
|----|
| 2  |
| 1  |
| 1  |
| 1  |
| 1  |
| 4  |
| 2  |
| 3  |
| 1  |
| 1  |
| 1  |
| 2  |
| 1  |
| 8  |
| 5  |
| 12 |
| 1  |
| 1  |
| 1  |
| 2  |
| 1  |
| 2  |
| 5  |
| 2  |
| 1  |
| 1  |
| 1  |
| 1  |
| 1  |
| 1  |
| 1  |
| 1  |
| 2  |
| 11 |
| 1  |
| 3  |
| 2  |
| 1  |
| 1  |
| 1  |
| 2  |
| 1  |
| 1  |
| 1  |
| 2  |
| 4  |
| 1  |
| 1  |
| 4  |
| 2  |
| 1  |
| 1  |



|   |
|---|
| 1 |
| 1 |
| 1 |
| 1 |
| 1 |
| 1 |
| 1 |
| 1 |
| 1 |
| 1 |
| 1 |
| 1 |
| 1 |
| 1 |
| 1 |
| 2 |
| 1 |
| 1 |
| 1 |
| 1 |
| 1 |
| 1 |
| 2 |
| 1 |
| 1 |
| 1 |
| 1 |
| 1 |
| 2 |
| 1 |
| 1 |
| 2 |
| 1 |
| 1 |
| 5 |
| 1 |
| 1 |
| 1 |
| 1 |
| 1 |
| 1 |
| 2 |
| 1 |
| 4 |
| 1 |
| 1 |
| 1 |
| 1 |
| 2 |
| 1 |
| 1 |
| 1 |



|   |
|---|
| 1 |
| 1 |
| 1 |
| 1 |
| 1 |
| 1 |
| 2 |
| 1 |
| 1 |
| 5 |
| 2 |
| 1 |
| 2 |
| 1 |
| 1 |
| 1 |
| 1 |
| 2 |
| 1 |
| 2 |
| 1 |
| 2 |
| 1 |
| 1 |
| 1 |
| 1 |
| 1 |
| 1 |
| 2 |
| 1 |
| 1 |
| 3 |
| 4 |
| 2 |
| 1 |
| 1 |
| 2 |
| 1 |
| 1 |
| 1 |
| 2 |
| 1 |
| 1 |
| 5 |
| 2 |
| 1 |
| 1 |
| 2 |
| 1 |
| 1 |
| 1 |
| 1 |
| 1 |
| 1 |

|   |
|---|
| 3 |
| 1 |
| 2 |
| 3 |
| 1 |
| 1 |
| 1 |
| 1 |
| 1 |
| 1 |
| 1 |
| 1 |
| 2 |
| 3 |
| 1 |
| 1 |
| 2 |
| 1 |
| 1 |
| 1 |
| 1 |
| 1 |
| 1 |
| 1 |
| 2 |
| 1 |
| 1 |
| 1 |
| 1 |
| 1 |
| 3 |
| 2 |
| 1 |
| 2 |
| 1 |
| 1 |
| 1 |
| 2 |
| 1 |
| 1 |
| 1 |
| 5 |
| 2 |
| 1 |
| 1 |
| 1 |
| 2 |
| 1 |
| 1 |
| 1 |
| 1 |
| 1 |
| 1 |
| 1 |
| 3 |
| 1 |
| 1 |

|    |
|----|
| 1  |
| 1  |
| 1  |
| 2  |
| 1  |
| 11 |
| 1  |
| 1  |
| 1  |
| 8  |
| 1  |
| 1  |
| 5  |
| 2  |
| 1  |
| 1  |
| 4  |
| 1  |
| 1  |
| 2  |
| 2  |
| 1  |
| 1  |
| 2  |
| 1  |
| 1  |
| 1  |
| 1  |
| 3  |
| 3  |
| 1  |
| 1  |
| 1  |
| 1  |
| 3  |
| 1  |
| 1  |
| 7  |
| 1  |
| 1  |
| 1  |
| 1  |
| 5  |
| 1  |
| 2  |
| 2  |
| 1  |
| 1  |
| 1  |
| 1  |
| 1  |
| 1  |



|    |
|----|
| 1  |
| 1  |
| 1  |
| 1  |
| 1  |
| 1  |
| 1  |
| 1  |
| 1  |
| 1  |
| 2  |
| 1  |
| 1  |
| 1  |
| 1  |
| 3  |
| 2  |
| 2  |
| 1  |
| 1  |
| 2  |
| 7  |
| 2  |
| 1  |
| 2  |
| 4  |
| 1  |
| 1  |
| 1  |
| 2  |
| 2  |
| 1  |
| 3  |
| 1  |
| 2  |
| 1  |
| 2  |
| 1  |
| 1  |
| 1  |
| 4  |
| 1  |
| 1  |
| 2  |
| 10 |
| 3  |
| 1  |
| 1  |
| 2  |
| 1  |
| 1  |
| 1  |
| 1  |
| 2  |
| 2  |

|   |
|---|
| 1 |
| 4 |
| 1 |
| 2 |
| 1 |
| 1 |
| 1 |
| 3 |
| 1 |
| 1 |
| 1 |
| 1 |
| 5 |
| 1 |
| 2 |
| 1 |
| 1 |
| 1 |
| 2 |
| 1 |
| 1 |
| 3 |
| 2 |
| 1 |
| 1 |
| 1 |
| 1 |
| 1 |
| 1 |
| 2 |
| 2 |
| 1 |
| 1 |
| 1 |
| 1 |
| 1 |
| 1 |
| 2 |
| 2 |
| 1 |
| 1 |
| 1 |
| 1 |
| 1 |
| 1 |
| 1 |
| 2 |
| 1 |
| 1 |
| 1 |
| 2 |
| 1 |
| 1 |
| 1 |
| 2 |

|   |
|---|
| 1 |
| 1 |
| 1 |
| 1 |
| 1 |
| 1 |
| 1 |
| 1 |
| 1 |
| 1 |
| 2 |
| 1 |
| 1 |
| 1 |
| 1 |
| 1 |
| 1 |
| 1 |
| 1 |
| 1 |
| 1 |
| 1 |
| 1 |
| 3 |
| 1 |
| 1 |
| 1 |
| 1 |
| 1 |
| 1 |
| 1 |
| 2 |
| 3 |
| 1 |
| 1 |
| 1 |
| 1 |
| 1 |
| 2 |
| 1 |
| 1 |
| 1 |
| 1 |
| 1 |
| 3 |
| 2 |
| 1 |
| 1 |
| 1 |
| 5 |
| 1 |
| 4 |
| 1 |
| 1 |
| 1 |
| 1 |
| 1 |
| 1 |
| 1 |
| 2 |
| 1 |
| 1 |
| 3 |

|   |
|---|
| 1 |
| 1 |
| 2 |
| 2 |
| 2 |
| 1 |
| 1 |
| 6 |
| 1 |
| 1 |
| 1 |
| 1 |
| 1 |
| 1 |
| 2 |
| 1 |
| 1 |
| 2 |
| 2 |
| 2 |
| 1 |
| 1 |
| 1 |
| 1 |
| 1 |
| 1 |
| 1 |
| 1 |
| 2 |
| 2 |
| 1 |
| 2 |
| 1 |
| 3 |
| 1 |
| 2 |
| 1 |
| 2 |
| 1 |
| 2 |
| 1 |
| 4 |
| 2 |
| 1 |
| 1 |
| 1 |
| 1 |
| 1 |
| 1 |
| 1 |
| 1 |
| 1 |
| 1 |
| 2 |
| 1 |
| 1 |
| 2 |
| 2 |



|   |
|---|
| 2 |
| 1 |
| 2 |
| 1 |
| 3 |
| 1 |
| 1 |
| 4 |
| 3 |
| 2 |
| 2 |
| 2 |
| 1 |
| 2 |
| 2 |
| 1 |
| 1 |
| 1 |
| 1 |
| 3 |
| 2 |
| 1 |
| 2 |
| 2 |
| 1 |
| 1 |
| 1 |
| 3 |
| 1 |
| 1 |
| 1 |
| 1 |
| 2 |
| 1 |
| 1 |
| 2 |
| 1 |
| 1 |
| 1 |
| 1 |
| 1 |
| 1 |
| 1 |
| 1 |
| 1 |
| 1 |
| 1 |
| 1 |
| 1 |
| 1 |
| 1 |
| 1 |
| 1 |
| 1 |
| 1 |
| 1 |
| 1 |
| 2 |
| 4 |
| 1 |







|   |
|---|
| 1 |
| 1 |
| 1 |
| 1 |
| 1 |
| 1 |
| 1 |
| 3 |
| 1 |
| 3 |
| 3 |
| 1 |
| 1 |
| 2 |
| 2 |
| 1 |
| 1 |
| 1 |
| 1 |
| 3 |
| 1 |
| 4 |
| 1 |
| 1 |
| 1 |
| 1 |
| 1 |
| 1 |
| 1 |
| 1 |
| 1 |
| 1 |
| 6 |
| 2 |
| 1 |
| 1 |
| 1 |
| 1 |
| 1 |
| 1 |
| 2 |
| 2 |
| 1 |
| 1 |
| 1 |
| 2 |
| 1 |
| 1 |
| 2 |
| 1 |
| 1 |
| 2 |
| 1 |
| 6 |
| 1 |





|   |
|---|
| 1 |
| 1 |
| 1 |
| 1 |
| 2 |
| 1 |
| 1 |
| 1 |
| 1 |
| 5 |
| 2 |
| 1 |
| 3 |
| 4 |
| 3 |
| 1 |
| 4 |
| 2 |
| 6 |
| 1 |
| 3 |
| 1 |
| 1 |
| 2 |
| 1 |
| 2 |
| 1 |
| 1 |
| 1 |
| 2 |
| 1 |
| 1 |
| 4 |
| 1 |
| 1 |
| 1 |
| 1 |
| 1 |
| 1 |
| 1 |
| 1 |
| 1 |
| 1 |
| 1 |
| 1 |
| 1 |
| 1 |
| 1 |
| 1 |
| 1 |
| 1 |
| 1 |
| 1 |
| 1 |
| 1 |
| 1 |
| 1 |
| 1 |
| 1 |
| 1 |
| 1 |
| 1 |
| 2 |
| 1 |
| 1 |
| 2 |

|    |
|----|
| 1  |
| 1  |
| 1  |
| 1  |
| 1  |
| 2  |
| 1  |
| 1  |
| 2  |
| 2  |
| 3  |
| 1  |
| 3  |
| 23 |
| 3  |
| 1  |
| 1  |
| 2  |
| 2  |
| 1  |
| 1  |
| 6  |
| 1  |
| 1  |
| 1  |
| 1  |
| 1  |
| 6  |
| 1  |
| 1  |
| 2  |
| 1  |
| 1  |
| 3  |
| 1  |
| 2  |
| 1  |
| 1  |
| 1  |
| 2  |
| 1  |
| 3  |
| 1  |
| 1  |
| 2  |
| 1  |
| 1  |
| 2  |
| 2  |
| 1  |
| 1  |
| 4  |
| 2  |
| 1  |
| 1  |
| 1  |

|   |
|---|
| 1 |
| 1 |
| 1 |
| 1 |
| 1 |
| 1 |
| 3 |
| 3 |
| 1 |
| 1 |
| 1 |
| 1 |
| 1 |
| 1 |
| 2 |
| 1 |
| 2 |
| 2 |
| 1 |
| 1 |
| 1 |
| 1 |
| 1 |
| 2 |
| 2 |
| 1 |
| 1 |
| 1 |
| 1 |
| 1 |
| 1 |
| 1 |
| 1 |
| 1 |
| 3 |
| 1 |
| 1 |
| 2 |
| 1 |
| 2 |
| 1 |
| 1 |
| 1 |
| 1 |
| 1 |
| 1 |
| 1 |
| 2 |
| 4 |
| 1 |

**of the 4 lung cancer cell lines H520, H23, H460 and H1688 fr**

| <b>Accession numbers</b>                                                                        |
|-------------------------------------------------------------------------------------------------|
| IPI00794900                                                                                     |
| IPI00797738                                                                                     |
| IPI00795717                                                                                     |
| IPI00478011                                                                                     |
| IPI00647593                                                                                     |
| IPI00375127                                                                                     |
| IPI00455527                                                                                     |
| IPI00472119                                                                                     |
| IPI00479366                                                                                     |
| IPI00738677                                                                                     |
| IPI00795769                                                                                     |
| IPI00175126                                                                                     |
| IPI00020513,IPI00797866                                                                         |
| IPI00783641                                                                                     |
| IPI00555602                                                                                     |
| IPI00785057                                                                                     |
| IPI00472724                                                                                     |
| IPI00384863                                                                                     |
| IPI00419827                                                                                     |
| IPI00472879                                                                                     |
| IPI00382617                                                                                     |
| IPI00164951,IPI00298454,IPI00477094,IPI00477666,IPI00479567,IPI00479700,IPI00749461,IPI00784621 |
| IPI00789847                                                                                     |
| IPI00169276                                                                                     |
| IPI00784131                                                                                     |
| IPI00027442,IPI00784131                                                                         |
| IPI00303207                                                                                     |
| IPI00013495,IPI00302146,IPI00642960,IPI00792186                                                 |
| IPI00063827,IPI00747859                                                                         |
| IPI00020982,IPI00219832                                                                         |
| IPI00440499                                                                                     |
| IPI00291419                                                                                     |
| IPI00009315                                                                                     |
| IPI00437751                                                                                     |
| IPI00007334                                                                                     |
| IPI00394838                                                                                     |
| IPI00021290                                                                                     |
| IPI00395469                                                                                     |
| IPI00219861                                                                                     |
| IPI00419240                                                                                     |
| IPI00021428                                                                                     |
| IPI00021439                                                                                     |
| IPI00021440                                                                                     |
| IPI00759776                                                                                     |
| IPI00013508                                                                                     |
| IPI00013808                                                                                     |
| IPI00005159,IPI00470573,IPI00749250                                                             |
| IPI00470573                                                                                     |
| IPI00028091                                                                                     |

|                                                 |
|-------------------------------------------------|
| IPI00296441                                     |
| IPI00013897                                     |
| IPI00420069                                     |
| IPI00420067                                     |
| IPI00288894                                     |
| IPI00029606,IPI00288894                         |
| IPI00011901,IPI00249735                         |
| IPI00021903                                     |
| IPI00440932,IPI00747759                         |
| IPI00005908                                     |
| IPI00036578                                     |
| IPI00152639                                     |
| IPI00157513                                     |
| IPI00790458                                     |
| IPI00025057,IPI00025058,IPI00394665             |
| IPI00394668                                     |
| IPI00000027                                     |
| IPI00746777                                     |
| IPI00651738                                     |
| IPI00234368                                     |
| IPI00033030,IPI00470921                         |
| IPI00026833                                     |
| IPI00007427                                     |
| IPI00374563                                     |
| IPI00032220                                     |
| IPI00012007                                     |
| IPI00555610                                     |
| IPI00030706                                     |
| IPI00000690,IPI00157908                         |
| IPI00010460                                     |
| IPI00215901,IPI00218988                         |
| IPI00217683                                     |
| IPI00237884                                     |
| IPI00220271                                     |
| IPI00413641                                     |
| IPI00105407                                     |
| IPI00029733                                     |
| IPI00005668                                     |
| IPI00291483                                     |
| IPI00305978                                     |
| IPI00293721                                     |
| IPI00022434,IPI00745872                         |
| IPI00015102,IPI00783803,IPI00795504,IPI00807403 |
| IPI00218914                                     |
| IPI00296183,IPI00654709,IPI00796116             |
| IPI00333619,IPI00394758                         |
| IPI00479877                                     |
| IPI00465439                                     |
| IPI00418262                                     |
| IPI00022426                                     |
| IPI00153060,IPI00740170                         |
| IPI00032958,IPI00657687,IPI00743594             |
| IPI00025849,IPI00449263                         |



|                                                             |
|-------------------------------------------------------------|
| IPI0007423,IPI00759824                                      |
| IPI00165393,IPI00640833                                     |
| IPI00030431                                                 |
| IPI00218918                                                 |
| IPI00414320                                                 |
| IPI00418169,IPI00455315                                     |
| IPI00329801                                                 |
| IPI00411453,IPI00477622,IPI00719680                         |
| IPI00337741                                                 |
| IPI00215911                                                 |
| IPI00006684,IPI00554742,IPI00555572                         |
| IPI00020012,IPI00796118                                     |
| IPI00031030                                                 |
| IPI00514157                                                 |
| IPI00168479                                                 |
| IPI00021842                                                 |
| IPI00006608,IPI00412681                                     |
| IPI00218693                                                 |
| IPI00514053                                                 |
| IPI00215914,IPI00215917                                     |
| IPI00215917                                                 |
| IPI00216520                                                 |
| IPI00797560                                                 |
| IPI00796541                                                 |
| IPI00003815,IPI00796541                                     |
| IPI00003327                                                 |
| IPI00328748                                                 |
| IPI00005160,IPI00737530                                     |
| IPI00790262                                                 |
| IPI00329685,IPI00744184                                     |
| IPI00165949,IPI00477831                                     |
| IPI00418446                                                 |
| IPI00420014                                                 |
| IPI00024572,IPI00032450,IPI00294834,IPI00783284,IPI00783617 |
| IPI00783284                                                 |
| IPI00555734                                                 |
| IPI00020632                                                 |
| IPI00289499                                                 |
| IPI00010863                                                 |
| IPI00006482                                                 |
| IPI00003021,IPI00302840,IPI00640401,IPI00788782             |
| IPI00008167                                                 |
| IPI00747443                                                 |
| IPI00440493                                                 |
| IPI00303476                                                 |
| IPI00002521,IPI00456008                                     |
| IPI00020430,IPI00784119,IPI00794988                         |
| IPI00168884,IPI00828107                                     |
| IPI00168884                                                 |
| IPI00007682                                                 |
| IPI00007812                                                 |
| IPI00641829                                                 |
| IPI00027235,IPI00478671                                     |

|                                     |
|-------------------------------------|
| IPI00296992,IPI00397361             |
| IPI00166729                         |
| IPI00004656,IPI00796379             |
| IPI00064848                         |
| IPI00477470                         |
| IPI00304331,IPI00477470             |
| IPI00009997                         |
| IPI00217345                         |
| IPI00215767                         |
| IPI00759755                         |
| IPI00746600                         |
| IPI00030128                         |
| IPI00000643                         |
| IPI00641582                         |
| IPI00026087                         |
| IPI00299024                         |
| IPI00010700,IPI00642817             |
| IPI00068254                         |
| IPI00220152                         |
| IPI00025864                         |
| IPI00006079,IPI00413671             |
| IPI00012058                         |
| IPI00010790,IPI00643384             |
| IPI00413587,IPI00420084             |
| IPI00219575                         |
| IPI00294158                         |
| IPI00014021                         |
| IPI00218042                         |
| IPI00301434                         |
| IPI00410214                         |
| IPI00795150                         |
| IPI00019906,IPI00218019,IPI00795150 |
| IPI00026240,IPI00657860             |
| IPI00218413                         |
| IPI00419473                         |
| IPI00013468,IPI00514701,IPI00644108 |
| IPI00003419                         |
| IPI00012236                         |
| IPI00006907                         |
| IPI00064212                         |
| IPI00292150                         |
| IPI00009922                         |
| IPI00792100                         |
| IPI00006980,IPI00792100             |
| IPI00479767                         |
| IPI00056357                         |
| IPI00014230                         |
| IPI00005918                         |
| IPI00296165                         |
| IPI00009793,IPI00795055             |
| IPI00017696                         |
| IPI00009659                         |

|                                                                                     |
|-------------------------------------------------------------------------------------|
| IPI00024913,IPI00218482,IPI00784162,IPI00784277,IPI00793677                         |
| IPI00550689                                                                         |
| IPI00295519,IPI00607570                                                             |
| IPI00165044,IPI00414183                                                             |
| IPI00152148                                                                         |
| IPI00816741                                                                         |
| IPI00007926                                                                         |
| IPI00022381                                                                         |
| IPI00031564                                                                         |
| IPI00218414                                                                         |
| IPI00295105                                                                         |
| IPI00395627,IPI00552308,IPI00745851                                                 |
| IPI00301263                                                                         |
| IPI00003813,IPI00166392                                                             |
| IPI00000914                                                                         |
| IPI00218696,IPI00333771                                                             |
| IPI00075248,IPI00386621,IPI00794543                                                 |
| IPI00020599                                                                         |
| IPI00789155                                                                         |
| IPI00014537,IPI00789155                                                             |
| IPI00172636,IPI00430291,IPI00827573,IPI00827625,IPI00828081,IPI00828139,IPI00828178 |
| IPI00100160,IPI00604431                                                             |
| IPI00103175                                                                         |
| IPI00020984                                                                         |
| IPI00008274                                                                         |
| IPI00011285                                                                         |
| IPI00005969                                                                         |
| IPI00026182                                                                         |
| IPI00218782,IPI00642256                                                             |
| IPI00026185,IPI00218782,IPI00642256                                                 |
| IPI00304409                                                                         |
| IPI00027443,IPI00158625,IPI00556365,IPI00556541                                     |
| IPI00760715,IPI00761035,IPI00761069,IPI00761140,IPI00761160                         |
| IPI00220857,IPI00305750,IPI00760715,IPI00761035,IPI00761069,IPI00761140,IPI00761160 |
| IPI00016746,IPI00024871                                                             |
| IPI00295386                                                                         |
| IPI00010320                                                                         |
| IPI00297579                                                                         |
| IPI00024662                                                                         |
| IPI00217357                                                                         |
| IPI00797903                                                                         |
| IPI00260630                                                                         |
| IPI00009308                                                                         |
| IPI00297779                                                                         |
| IPI00290770,IPI00553185,IPI00744315                                                 |
| IPI00302927                                                                         |
| IPI00010720                                                                         |
| IPI00027626                                                                         |
| IPI00018465                                                                         |
| IPI00302925,IPI00784090                                                             |
| IPI00152540                                                                         |
| IPI00029260                                                                         |
| IPI00410488,IPI00441094,IPI00719044,IPI00793688                                     |

|                                                                                                   |
|---------------------------------------------------------------------------------------------------|
| IPI00012788,IPI00645816                                                                           |
| IPI00297160,IPI00305064,IPI00418465,IPI00419219,IPI00827650,IPI00827658,IPI00827795,IPI00827893,I |
| IPI00305064,IPI00418465,IPI00827555,IPI00827650,IPI00827658,IPI00827795,IPI00828056,IPI00828117   |
| IPI00305064,IPI00418465,IPI00419219,IPI00827555,IPI00827650,IPI00827658,IPI00827795,IPI00827893,I |
| IPI00219853,IPI00374176,IPI00374177,IPI00398353,IPI00456644                                       |
| IPI00216550                                                                                       |
| IPI00031713                                                                                       |
| IPI00000190                                                                                       |
| IPI00215997,IPI00657796,IPI00795937                                                               |
| IPI00013122                                                                                       |
| IPI00007189                                                                                       |
| IPI00465294                                                                                       |
| IPI00025861,IPI00744889                                                                           |
| IPI00295399                                                                                       |
| IPI00293539                                                                                       |
| IPI00024046                                                                                       |
| IPI00290089                                                                                       |
| IPI00290085                                                                                       |
| IPI00216677,IPI00645614,IPI00747243                                                               |
| IPI00645614,IPI00747243                                                                           |
| IPI00014197,IPI00787933                                                                           |
| IPI00027486                                                                                       |
| IPI00099670                                                                                       |
| IPI00607801                                                                                       |
| IPI00165972                                                                                       |
| IPI00007306                                                                                       |
| IPI00029739                                                                                       |
| IPI00654723                                                                                       |
| IPI00012011                                                                                       |
| IPI00783540                                                                                       |
| IPI00333010                                                                                       |
| IPI00746813                                                                                       |
| IPI00006601                                                                                       |
| IPI00216738                                                                                       |
| IPI00301185,IPI00306719                                                                           |
| IPI00783390                                                                                       |
| IPI00299059                                                                                       |
| IPI00015897                                                                                       |
| IPI00465319                                                                                       |
| IPI00478414,IPI00654588                                                                           |
| IPI00099831,IPI00554485                                                                           |
| IPI00025333,IPI00387130                                                                           |
| IPI00216780                                                                                       |
| IPI00180954,IPI00641579,IPI00646241                                                               |
| IPI00022977                                                                                       |
| IPI00658109                                                                                       |
| IPI00033466                                                                                       |
| IPI00010896                                                                                       |
| IPI00001960                                                                                       |
| IPI00291930,IPI00397519                                                                           |
| IPI00013455,IPI00027172,IPI00217113                                                               |
| IPI00007257                                                                                       |
| IPI00413959                                                                                       |

|                                     |
|-------------------------------------|
| IPI00005491                         |
| IPI00396423,IPI00747063             |
| IPI00747063                         |
| IPI00024067,IPI00455383             |
| IPI00455383                         |
| IPI00291262,IPI00400826,IPI00795633 |
| IPI00219953                         |
| IPI00430813,IPI00430814             |
| IPI00430812                         |
| IPI00177728,IPI00646632             |
| IPI00015262                         |
| IPI00216682                         |
| IPI00029751                         |
| IPI00012386                         |
| IPI00827558                         |
| IPI00329573                         |
| IPI00828195                         |
| IPI00743696                         |
| IPI00306322                         |
| IPI00472200                         |
| IPI00477611                         |
| IPI00748917                         |
| IPI00291136                         |
| IPI00220613,IPI00304840             |
| IPI00219000                         |
| IPI00295857,IPI00646493             |
| IPI00295851                         |
| IPI00220219                         |
| IPI00399318                         |
| IPI00001890,IPI00783982             |
| IPI00007058                         |
| IPI00008453                         |
| IPI00017704                         |
| IPI00025086                         |
| IPI00216085,IPI00797738             |
| IPI00027078                         |
| IPI00031121                         |
| IPI00640372                         |
| IPI00550308                         |
| IPI00024403                         |
| IPI00011062                         |
| IPI00026219                         |
| IPI00419531                         |
| IPI00012998,IPI00030654             |
| IPI00030654                         |
| IPI00301395                         |
| IPI00027397                         |
| IPI00021997                         |
| IPI00027839                         |
| IPI00009294                         |
| IPI00006034                         |
| IPI00027806                         |

|                                                                                                   |
|---------------------------------------------------------------------------------------------------|
| IPI00004838                                                                                       |
| IPI00305469                                                                                       |
| IPI00004839                                                                                       |
| IPI00289561                                                                                       |
| IPI00220959,IPI00748502,IPI00793277                                                               |
| IPI00000792,IPI00641565,IPI00647366                                                               |
| IPI00025366                                                                                       |
| IPI00031801,IPI00219148                                                                           |
| IPI00398121,IPI00470891                                                                           |
| IPI00022744                                                                                       |
| IPI00015881                                                                                       |
| IPI00741317                                                                                       |
| IPI00442073                                                                                       |
| IPI00305477                                                                                       |
| IPI00032293                                                                                       |
| IPI00021828                                                                                       |
| IPI00011528,IPI00644499                                                                           |
| IPI00013256,IPI00607841,IPI00744127                                                               |
| IPI00006122,IPI00515009                                                                           |
| IPI00007778                                                                                       |
| IPI00020977                                                                                       |
| IPI00060423                                                                                       |
| IPI00215948                                                                                       |
| IPI00017292,IPI00787027,IPI00787237                                                               |
| IPI00787237                                                                                       |
| IPI00182469,IPI00219725,IPI00219728,IPI00219730,IPI00219732,IPI00219734,IPI00219738,IPI00219739,I |
| IPI00290142                                                                                       |
| IPI00645702                                                                                       |
| IPI00021794,IPI00640525,IPI00791457                                                               |
| IPI00640525                                                                                       |
| IPI00295741                                                                                       |
| IPI00022810                                                                                       |
| IPI00011229                                                                                       |
| IPI00012887                                                                                       |
| IPI00000013                                                                                       |
| IPI00002745                                                                                       |
| IPI00029601,IPI00062884                                                                           |
| IPI00014312                                                                                       |
| IPI00034319,IPI00554556,IPI00554634                                                               |
| IPI00013874                                                                                       |
| IPI00396257                                                                                       |
| IPI00292936                                                                                       |
| IPI00303954                                                                                       |
| IPI00465315                                                                                       |
| IPI00644231,IPI00791837                                                                           |
| IPI00644231,IPI00791837                                                                           |
| IPI00006273                                                                                       |
| IPI00299219                                                                                       |
| IPI00044326                                                                                       |
| IPI00028911                                                                                       |
| IPI00216951                                                                                       |
| IPI00165230,IPI00335930                                                                           |
| IPI00010182,IPI00218836,IPI00815745                                                               |

|                                                                                     |
|-------------------------------------------------------------------------------------|
| IPI00003406,IPI00295624                                                             |
| IPI00295624                                                                         |
| IPI00300567                                                                         |
| IPI00220503,IPI00793544                                                             |
| IPI00220342                                                                         |
| IPI00786914                                                                         |
| IPI00293464,IPI00784120,IPI00786914                                                 |
| IPI00025394                                                                         |
| IPI00001477,IPI00219996,IPI00657861                                                 |
| IPI00293867                                                                         |
| IPI00293655                                                                         |
| IPI00023785,IPI00651677                                                             |
| IPI00651653                                                                         |
| IPI00008943,IPI00019918                                                             |
| IPI00015953                                                                         |
| IPI00644431                                                                         |
| IPI00215637                                                                         |
| IPI00409671                                                                         |
| IPI00829889                                                                         |
| IPI00329791                                                                         |
| IPI00017617                                                                         |
| IPI00003482                                                                         |
| IPI00020021                                                                         |
| IPI00306280                                                                         |
| IPI00010882                                                                         |
| IPI00396435                                                                         |
| IPI00742905                                                                         |
| IPI00619921                                                                         |
| IPI00221394                                                                         |
| IPI00003269                                                                         |
| IPI00398918                                                                         |
| IPI00016353                                                                         |
| IPI00015911                                                                         |
| IPI00030351,IPI00218729,IPI00552213,IPI00552376,IPI00552511,IPI00552682,IPI00553029 |
| IPI00012535                                                                         |
| IPI00032406                                                                         |
| IPI00015947                                                                         |
| IPI00008454                                                                         |
| IPI00024523                                                                         |
| IPI00293260                                                                         |
| IPI00006713                                                                         |
| IPI00003438                                                                         |
| IPI00010348                                                                         |
| IPI00333140,IPI00783545                                                             |
| IPI00146935                                                                         |
| IPI00146935,IPI00235412,IPI00473085,IPI00555883                                     |
| IPI00037283                                                                         |
| IPI00033022,IPI00181352,IPI00218889,IPI00477431,IPI00514550,IPI00743573,IPI00794575 |
| IPI00015856,IPI00029820,IPI00658188,IPI00658215                                     |
| IPI00171856                                                                         |
| IPI00020672                                                                         |
| IPI00257508                                                                         |

|                                                 |
|-------------------------------------------------|
| IPI00029111                                     |
| IPI00025846,IPI00220146                         |
| IPI00028931                                     |
| IPI00013933                                     |
| IPI00473014,IPI00643237                         |
| IPI00031045,IPI00473014,IPI00643237             |
| IPI00793322                                     |
| IPI00749113                                     |
| IPI00013679,IPI00749113,IPI00793322             |
| IPI00477531                                     |
| IPI00456969,IPI00477531                         |
| IPI00827859                                     |
| IPI00019329                                     |
| IPI00745955                                     |
| IPI00011416                                     |
| IPI00024993                                     |
| IPI00003351,IPI00645849                         |
| IPI00306046,IPI00399105                         |
| IPI00396485                                     |
| IPI00014424                                     |
| IPI00178440                                     |
| IPI00064086                                     |
| IPI00642971                                     |
| IPI00003588                                     |
| IPI00000875,IPI00747497                         |
| IPI00186290                                     |
| IPI00029658,IPI00220813,IPI00220814,IPI00220815 |
| IPI00060181                                     |
| IPI00025840                                     |
| IPI00005517                                     |
| IPI00024307                                     |
| IPI00003519                                     |
| IPI00028381                                     |
| IPI00005578                                     |
| IPI00015077                                     |
| IPI00219678                                     |
| IPI00021728,IPI00793912                         |
| IPI00297982                                     |
| IPI00290461                                     |
| IPI00033143                                     |
| IPI00012795                                     |
| IPI00647650                                     |
| IPI00290460                                     |
| IPI00654777                                     |
| IPI00013068                                     |
| IPI00465233                                     |
| IPI00016910,IPI00646839                         |
| IPI00747447                                     |
| IPI00025491                                     |
| IPI00328328,IPI00409717                         |
| IPI00012079,IPI00439415                         |
| IPI00027485                                     |
| IPI00783643,IPI00788723                         |



|                                                                                                   |
|---------------------------------------------------------------------------------------------------|
| IPI00220365,IPI00384463,IPI00479262,IPI00798400                                                   |
| IPI00386533                                                                                       |
| IPI00015952                                                                                       |
| IPI00022648                                                                                       |
| IPI00411704                                                                                       |
| IPI00376005,IPI00411704                                                                           |
| IPI00299254                                                                                       |
| IPI00301936                                                                                       |
| IPI00001466                                                                                       |
| IPI00374054,IPI00411623,IPI00646954                                                               |
| IPI00465248                                                                                       |
| IPI00216171                                                                                       |
| IPI00038378,IPI00795241                                                                           |
| IPI00156171,IPI00303210                                                                           |
| IPI00470835                                                                                       |
| IPI00220797,IPI00383552,IPI00410177,IPI00410178,IPI00410179,IPI00410180,IPI00410181,IPI00470835,I |
| IPI00478478                                                                                       |
| IPI00032230                                                                                       |
| IPI00745296                                                                                       |
| IPI00008318                                                                                       |
| IPI00008290,IPI00215945                                                                           |
| IPI00009896                                                                                       |
| IPI00013452                                                                                       |
| IPI00163849,IPI00645613,IPI00646339,IPI00794004,IPI00795804,IPI00797124                           |
| IPI00029631                                                                                       |
| IPI00386755                                                                                       |
| IPI00024911                                                                                       |
| IPI00411706                                                                                       |
| IPI00015186                                                                                       |
| IPI00009841,IPI00065554                                                                           |
| IPI00293128                                                                                       |
| IPI00004047,IPI00414468                                                                           |
| IPI00002732,IPI00790204                                                                           |
| IPI00019576,IPI00797559                                                                           |
| IPI00607735,IPI00644969                                                                           |
| IPI00001754,IPI00069985,IPI00294993                                                               |
| IPI00022937                                                                                       |
| IPI00218038                                                                                       |
| IPI00456750,IPI00647286                                                                           |
| IPI00006657                                                                                       |
| IPI00790820                                                                                       |
| IPI00021923                                                                                       |
| IPI00303318,IPI00789253                                                                           |
| IPI00030098                                                                                       |
| IPI00031820                                                                                       |
| IPI00300074                                                                                       |
| IPI00645907                                                                                       |
| IPI00031411                                                                                       |
| IPI00025039                                                                                       |
| IPI00296537                                                                                       |
| IPI00296534                                                                                       |
| IPI00465038                                                                                       |
| IPI00023824,IPI00465038                                                                           |

|                                                                                                   |
|---------------------------------------------------------------------------------------------------|
| IPI00784458                                                                                       |
| IPI00328113,IPI00784458                                                                           |
| IPI00019439,IPI00784315                                                                           |
| IPI00101405,IPI00797614                                                                           |
| IPI00026215                                                                                       |
| IPI00021048,IPI00216269,IPI00645867,IPI00790914,IPI00827894                                       |
| IPI00032908                                                                                       |
| IPI00021399                                                                                       |
| IPI00328245                                                                                       |
| IPI00296561                                                                                       |
| IPI00296053,IPI00759715                                                                           |
| IPI00014398,IPI00647207                                                                           |
| IPI00396967,IPI00743342                                                                           |
| IPI00395337,IPI00657863                                                                           |
| IPI00008449,IPI00395337,IPI00657863,IPI00658114                                                   |
| IPI00303300                                                                                       |
| IPI00413778                                                                                       |
| IPI00024157                                                                                       |
| IPI00219005                                                                                       |
| IPI00059292,IPI00219306                                                                           |
| IPI00305010                                                                                       |
| IPI00002191                                                                                       |
| IPI00002408                                                                                       |
| IPI00167710                                                                                       |
| IPI00302592                                                                                       |
| IPI00333541                                                                                       |
| IPI00480131                                                                                       |
| IPI00289334,IPI00382696,IPI00382697,IPI00382700,IPI00477536,IPI00480131                           |
| IPI00783128                                                                                       |
| IPI00215720,IPI00215721,IPI00215723,IPI00215724,IPI00215725,IPI00412343,IPI00645666,IPI00783298,I |
| IPI00470919                                                                                       |
| IPI00744362                                                                                       |
| IPI00022418                                                                                       |
| IPI00015580,IPI00028718,IPI00607808,IPI00646028,IPI00807364                                       |
| IPI00329327                                                                                       |
| IPI00180707                                                                                       |
| IPI00163187,IPI00747810                                                                           |
| IPI00021081,IPI00217070,IPI00217071                                                               |
| IPI00029723                                                                                       |
| IPI00025155                                                                                       |
| IPI00477747                                                                                       |
| IPI00298956                                                                                       |
| IPI00008087                                                                                       |
| IPI00375441,IPI00644386,IPI00788671                                                               |
| IPI00788671                                                                                       |
| IPI00745745                                                                                       |
| IPI00012440                                                                                       |
| IPI00018387                                                                                       |
| IPI00260715                                                                                       |
| IPI00646643                                                                                       |
| IPI00412643,IPI00786930                                                                           |
| IPI00016249,IPI00554715                                                                           |

|                                     |
|-------------------------------------|
| IPI00554715                         |
| IPI00012442                         |
| IPI00009057                         |
| IPI00760751                         |
| IPI00216008,IPI00289800,IPI00760751 |
| IPI00293088                         |
| IPI00783446                         |
| IPI00298949                         |
| IPI00026637                         |
| IPI00008790                         |
| IPI00183321                         |
| IPI00029605                         |
| IPI00375205                         |
| IPI00004669                         |
| IPI00005401                         |
| IPI00026991                         |
| IPI00328391                         |
| IPI00166613                         |
| IPI00472068                         |
| IPI00011454                         |
| IPI00219018                         |
| IPI00783097                         |
| IPI00025273                         |
| IPI00032532,IPI00412410,IPI00412412 |
| IPI00103554                         |
| IPI00021807,IPI00759616             |
| IPI00296635                         |
| IPI00306140                         |
| IPI00215768                         |
| IPI00010090                         |
| IPI00001159                         |
| IPI00166086                         |
| IPI00465184                         |
| IPI00306543                         |
| IPI00010154                         |
| IPI00640006                         |
| IPI00031461                         |
| IPI00217952                         |
| IPI00023728                         |
| IPI00024705                         |
| IPI00554793                         |
| IPI00025869                         |
| IPI00441344,IPI00797646             |
| IPI00433284                         |
| IPI00414717,IPI00641153             |
| IPI00220766                         |
| IPI00007102                         |
| IPI00219025                         |
| IPI00168262                         |
| IPI00018236                         |
| IPI00412987,IPI00549557             |
| IPI00029079                         |
| IPI00026268                         |

|                                                                                                   |
|---------------------------------------------------------------------------------------------------|
| IPI00641950                                                                                       |
| IPI00009305                                                                                       |
| IPI00550894,IPI00744859                                                                           |
| IPI00000137                                                                                       |
| IPI00012102                                                                                       |
| IPI00171411,IPI00759659,IPI00784293                                                               |
| IPI00759659,IPI00784293                                                                           |
| IPI00004962                                                                                       |
| IPI00743931                                                                                       |
| IPI00031241,IPI00743931                                                                           |
| IPI00219029                                                                                       |
| IPI00018206                                                                                       |
| IPI00015688                                                                                       |
| IPI00232571                                                                                       |
| IPI00001755                                                                                       |
| IPI00027497                                                                                       |
| IPI00030910,IPI00639921                                                                           |
| IPI00150961,IPI00783872                                                                           |
| IPI00651640                                                                                       |
| IPI00217481,IPI00423340,IPI00423342,IPI00651640,IPI00651770                                       |
| IPI00006166                                                                                       |
| IPI00397949,IPI00412420,IPI00783104                                                               |
| IPI00026199                                                                                       |
| IPI00021327                                                                                       |
| IPI00328709                                                                                       |
| IPI00037448,IPI00550682                                                                           |
| IPI00550682                                                                                       |
| IPI00296713                                                                                       |
| IPI00011722,IPI00218672,IPI00647318                                                               |
| IPI00218671                                                                                       |
| IPI00026314                                                                                       |
| IPI00218829                                                                                       |
| IPI00016862                                                                                       |
| IPI00010706                                                                                       |
| IPI00657682                                                                                       |
| IPI00019755,IPI00642936                                                                           |
| IPI00219757                                                                                       |
| IPI00290416                                                                                       |
| IPI00021924                                                                                       |
| IPI00018278,IPI00218448                                                                           |
| IPI00220994                                                                                       |
| IPI00219038,IPI00413826                                                                           |
| IPI00745553                                                                                       |
| IPI00021808                                                                                       |
| IPI00410714                                                                                       |
| IPI00217471,IPI00220706,IPI00473011,IPI00654755,IPI00657660,IPI00657911,IPI00784636,IPI00796636,I |
| IPI00740800                                                                                       |
| IPI00453476,IPI00549725                                                                           |
| IPI00176610,IPI00741006                                                                           |
| IPI00289601                                                                                       |
| IPI00514330                                                                                       |
| IPI00007063                                                                                       |
| IPI00022228                                                                                       |

|                                                                                                   |
|---------------------------------------------------------------------------------------------------|
| IPI00027851,IPI00829779                                                                           |
| IPI00012585                                                                                       |
| IPI00303174                                                                                       |
| IPI00239077                                                                                       |
| IPI00000335                                                                                       |
| IPI00024417,IPI00784470,IPI00788073,IPI00792558                                                   |
| IPI00021370,IPI00784038                                                                           |
| IPI00019894,IPI00021370,IPI00784038                                                               |
| IPI00217468                                                                                       |
| IPI00217465                                                                                       |
| IPI00217466                                                                                       |
| IPI00045109,IPI00219037                                                                           |
| IPI00026272                                                                                       |
| IPI00081836,IPI00102165,IPI00216457,IPI00220855,IPI00255316,IPI00291764,IPI00339274,IPI00552873   |
| IPI00152906,IPI00303133,IPI00329665,IPI00719084,IPI00794461                                       |
| IPI00018534,IPI00020101,IPI00152906,IPI00303133,IPI00329665,IPI00419833,IPI00477495,IPI00554798,I |
| IPI00152785                                                                                       |
| IPI00465070                                                                                       |
| IPI00453473                                                                                       |
| IPI00216457,IPI00339274                                                                           |
| IPI00339274                                                                                       |
| IPI00454695,IPI00746251                                                                           |
| IPI00003935,IPI00152785,IPI00166293,IPI00220403,IPI00515061                                       |
| IPI00171611,IPI00719351                                                                           |
| IPI00018246                                                                                       |
| IPI00102864                                                                                       |
| IPI00644631                                                                                       |
| IPI00742968                                                                                       |
| IPI00472882                                                                                       |
| IPI00760554                                                                                       |
| IPI00472736                                                                                       |
| IPI00472112,IPI00472448                                                                           |
| IPI00471955,IPI00472284,IPI00472456,IPI00646083,IPI00655604,IPI00718924,IPI00744375,IPI00744689,I |
| IPI00472284                                                                                       |
| IPI00472138,IPI00655604,IPI00747198                                                               |
| IPI00471951,IPI00816057                                                                           |
| IPI00472605                                                                                       |
| IPI00651697                                                                                       |
| IPI00473131                                                                                       |
| IPI00472035,IPI00745649                                                                           |
| IPI00789627                                                                                       |
| IPI00795906                                                                                       |
| IPI00107380                                                                                       |
| IPI00004672                                                                                       |
| IPI00028160,IPI00219877                                                                           |
| IPI00419258,IPI00644653,IPI00645948,IPI00815806                                                   |
| IPI00815806                                                                                       |
| IPI00219097                                                                                       |
| IPI00217477,IPI00411540,IPI00640781,IPI00643317                                                   |
| IPI00007764,IPI00384857                                                                           |
| IPI00384857                                                                                       |
| IPI00011913                                                                                       |

|                                     |
|-------------------------------------|
| IPI00215965,IPI00465365,IPI00797148 |
| IPI00396378                         |
| IPI00419373                         |
| IPI00334587,IPI00334713,IPI00742926 |
| IPI00334713                         |
| IPI00216592                         |
| IPI00477313                         |
| IPI00011274,IPI00045498             |
| IPI00045498                         |
| IPI00003881                         |
| IPI00013881                         |
| IPI00479191                         |
| IPI00026230                         |
| IPI00013877,IPI00216493             |
| IPI00514561,IPI00807545             |
| IPI00216049,IPI00216746,IPI00807545 |
| IPI00807545                         |
| IPI00027834,IPI00796199             |
| IPI00171903,IPI00383296             |
| IPI00383296                         |
| IPI00012074,IPI00644055             |
| IPI00644079                         |
| IPI00479217                         |
| IPI00013070,IPI00167147             |
| IPI00456887,IPI00827583             |
| IPI00296291,IPI00642238,IPI00744429 |
| IPI00218493                         |
| IPI00304693,IPI00607616,IPI00736669 |
| IPI00157454,IPI00160316,IPI00395692 |
| IPI00382470                         |
| IPI00334775                         |
| IPI00414676                         |
| IPI00027230                         |
| IPI00304925                         |
| IPI00002966                         |
| IPI00295485,IPI00828021             |
| IPI00003362                         |
| IPI00003865                         |
| IPI00788958                         |
| IPI00007765                         |
| IPI00025512                         |
| IPI00784154                         |
| IPI00472102                         |
| IPI00220362                         |
| IPI00024284                         |
| IPI00796127                         |
| IPI00514983                         |
| IPI00218993,IPI00514983             |
| IPI00383665                         |
| IPI00643586                         |
| IPI00003176                         |
| IPI00168847,IPI00178140,IPI00654773 |
| IPI00000877                         |

|                                                             |
|-------------------------------------------------------------|
| IPI00644127                                                 |
| IPI00008494                                                 |
| IPI00290456                                                 |
| IPI00790218                                                 |
| IPI00220373                                                 |
| IPI00027223                                                 |
| IPI00011107                                                 |
| IPI00220014                                                 |
| IPI00433029                                                 |
| IPI00289819                                                 |
| IPI00297284                                                 |
| IPI00556155                                                 |
| IPI00018305,IPI00556155                                     |
| IPI00029236                                                 |
| IPI00029235                                                 |
| IPI00016915                                                 |
| IPI00291987                                                 |
| IPI00056478                                                 |
| IPI00020354,IPI00647552                                     |
| IPI00002316                                                 |
| IPI00021382                                                 |
| IPI00007793                                                 |
| IPI00297124                                                 |
| IPI00005198                                                 |
| IPI00298788,IPI00418313                                     |
| IPI00219330                                                 |
| IPI00006164                                                 |
| IPI00009960,IPI00554469                                     |
| IPI00020906                                                 |
| IPI00291510                                                 |
| IPI00005944                                                 |
| IPI00007402,IPI00784008                                     |
| IPI00009342                                                 |
| IPI00375631                                                 |
| IPI00478861,IPI00549569,IPI00640098,IPI00644161,IPI00645069 |
| IPI00645194                                                 |
| IPI00010105                                                 |
| IPI00640865                                                 |
| IPI00031821                                                 |
| IPI00375446                                                 |
| IPI00099650                                                 |
| IPI00014238,IPI00307092                                     |
| IPI00060715                                                 |
| IPI00008575,IPI00082310,IPI00385834,IPI00479209             |
| IPI00082310                                                 |
| IPI00298363                                                 |
| IPI00479786                                                 |
| IPI00641384                                                 |
| IPI00472754,IPI00749513                                     |
| IPI00448751                                                 |
| IPI00015504                                                 |
| IPI00783537                                                 |

|                                                 |
|-------------------------------------------------|
| IPI00012837                                     |
| IPI00022296                                     |
| IPI00220142                                     |
| IPI00394906                                     |
| IPI00002818,IPI00218137                         |
| IPI00793215                                     |
| IPI00002214                                     |
| IPI00012578                                     |
| IPI00001639                                     |
| IPI00140177,IPI00218929,IPI00651704             |
| IPI00220327                                     |
| IPI00217963                                     |
| IPI00554788,IPI00784347                         |
| IPI00784347                                     |
| IPI00479145                                     |
| IPI00290857                                     |
| IPI00306959                                     |
| IPI00554648                                     |
| IPI00019359                                     |
| IPI00328753,IPI00337736                         |
| IPI00003818                                     |
| IPI00027087,IPI00334532,IPI00646281             |
| IPI00375294                                     |
| IPI00218725,IPI00479834                         |
| IPI00641693                                     |
| IPI00783665                                     |
| IPI00013976                                     |
| IPI00296922                                     |
| IPI00298281                                     |
| IPI00009030,IPI00216172,IPI00739827             |
| IPI00419237                                     |
| IPI00103994                                     |
| IPI00009650                                     |
| IPI00010471                                     |
| IPI00217966                                     |
| IPI00219217                                     |
| IPI00792252                                     |
| IPI00000070,IPI00792252                         |
| IPI00032491                                     |
| IPI00045839                                     |
| IPI00455739                                     |
| IPI00219219                                     |
| IPI00465431                                     |
| IPI00023673                                     |
| IPI00293303                                     |
| IPI00008918,IPI00220465,IPI00796222,IPI00796705 |
| IPI00748567                                     |
| IPI00007207,IPI00446007,IPI00748567             |
| IPI00005686                                     |
| IPI00026530                                     |
| IPI00009950                                     |
| IPI00021405,IPI00216953                         |
| IPI00216952                                     |



|                                                             |
|-------------------------------------------------------------|
| IPI00217975                                                 |
| IPI00009771                                                 |
| IPI00169285                                                 |
| IPI00377047                                                 |
| IPI00397808                                                 |
| IPI00399212,IPI00414127                                     |
| IPI00456898                                                 |
| IPI00027378                                                 |
| IPI00217477,IPI00376756,IPI00411540,IPI00640781,IPI00643317 |
| IPI00183920,IPI00297477                                     |
| IPI00740545                                                 |
| IPI00014263,IPI00220894                                     |
| IPI00788271                                                 |
| IPI00007797                                                 |
| IPI00786995                                                 |
| IPI00028109                                                 |
| IPI00294839,IPI00782994                                     |
| IPI00782994                                                 |
| IPI00183445,IPI00410210                                     |
| IPI00023704                                                 |
| IPI00002255,IPI00477088                                     |
| IPI00045841                                                 |
| IPI00024292                                                 |
| IPI00005774                                                 |
| IPI00170935                                                 |
| IPI00396321                                                 |
| IPI00785113                                                 |
| IPI00006207,IPI00382733                                     |
| IPI00328716                                                 |
| IPI00219871                                                 |
| IPI00409640,IPI00409641,IPI00641640                         |
| IPI00328218,IPI00409640,IPI00409641,IPI00641640             |
| IPI00219077,IPI00514090                                     |
| IPI00514090                                                 |
| IPI00292657                                                 |
| IPI00073196,IPI00398794                                     |
| IPI00783492                                                 |
| IPI00006932                                                 |
| IPI00216804                                                 |
| IPI00020986,IPI00794403                                     |
| IPI00301459                                                 |
| IPI00303882                                                 |
| IPI00256861,IPI00478226,IPI00513991,IPI00550385,IPI00744472 |
| IPI00432363,IPI00514468                                     |
| IPI00301104                                                 |
| IPI00018042                                                 |
| IPI00009542,IPI00477809                                     |
| IPI00439446                                                 |
| IPI00009145                                                 |
| IPI00008207                                                 |
| IPI00003802                                                 |
| IPI00008868                                                 |

|                                                             |
|-------------------------------------------------------------|
| IPI00003842,IPI00010728,IPI00472094                         |
| IPI00219604                                                 |
| IPI00396171,IPI00745518                                     |
| IPI00220113,IPI00396171,IPI00745518                         |
| IPI00745518                                                 |
| IPI00003479                                                 |
| IPI00017596                                                 |
| IPI00219301                                                 |
| IPI00641181                                                 |
| IPI00008240                                                 |
| IPI00010157                                                 |
| IPI00002324,IPI00181717                                     |
| IPI00168520,IPI00473118,IPI00554542                         |
| IPI00005690                                                 |
| IPI00789551                                                 |
| IPI00017297,IPI00789551                                     |
| IPI00397466                                                 |
| IPI00016334                                                 |
| IPI00013214                                                 |
| IPI00018349                                                 |
| IPI00031517                                                 |
| IPI00299904,IPI00376143                                     |
| IPI00552897                                                 |
| IPI00291005                                                 |
| IPI00291006                                                 |
| IPI00010333                                                 |
| IPI00008215                                                 |
| IPI00399089                                                 |
| IPI00029273,IPI00294528,IPI00792387                         |
| IPI00300763,IPI00789396                                     |
| IPI00789396                                                 |
| IPI00022621,IPI00644827                                     |
| IPI00002236                                                 |
| IPI00025809                                                 |
| IPI00016743                                                 |
| IPI00395751,IPI00744230                                     |
| IPI00020407                                                 |
| IPI00298618                                                 |
| IPI00374065,IPI00455473,IPI00739902,IPI00740837,IPI00741107 |
| IPI00640150,IPI00647961                                     |
| IPI00293276                                                 |
| IPI00293748                                                 |
| IPI00004233                                                 |
| IPI00023461,IPI00759546                                     |
| IPI00008561                                                 |
| IPI00013405                                                 |
| IPI00306778                                                 |
| IPI00027780                                                 |
| IPI00005707                                                 |
| IPI00033494,IPI00220573,IPI00604523                         |
| IPI00005537                                                 |
| IPI00154975                                                 |

|                                                                                                   |
|---------------------------------------------------------------------------------------------------|
| IPI00219365                                                                                       |
| IPI00171798                                                                                       |
| IPI00011876                                                                                       |
| IPI00218342,IPI00794900                                                                           |
| IPI00179589                                                                                       |
| IPI00013955,IPI00218163,IPI00218164,IPI00218165,IPI00218169,IPI00218170,IPI00385173,IPI00607569,I |
| IPI00011448                                                                                       |
| IPI00019502                                                                                       |
| IPI00797001                                                                                       |
| IPI00335168,IPI00413922,IPI00744444,IPI00789605,IPI00795576,IPI00796366,IPI00797001,IPI00797626   |
| IPI00789605                                                                                       |
| IPI00743335                                                                                       |
| IPI00008455,IPI00069126,IPI00642722,IPI00816452,IPI00816461                                       |
| IPI00023748,IPI00797126                                                                           |
| IPI00008787                                                                                       |
| IPI00147874                                                                                       |
| IPI00023860,IPI00789029,IPI00791065,IPI00793389                                                   |
| IPI00017763                                                                                       |
| IPI00293817                                                                                       |
| IPI00032158,IPI00386189                                                                           |
| IPI00306960,IPI00646656                                                                           |
| IPI00179953                                                                                       |
| IPI00555628                                                                                       |
| IPI00435020,IPI00795918                                                                           |
| IPI00019380                                                                                       |
| IPI00604620                                                                                       |
| IPI00827674                                                                                       |
| IPI00288941                                                                                       |
| IPI00022078,IPI00183085,IPI00783586                                                               |
| IPI00291328,IPI00412122,IPI00646556                                                               |
| IPI00020008                                                                                       |
| IPI00023754                                                                                       |
| IPI00795624                                                                                       |
| IPI00002525                                                                                       |
| IPI00023814,IPI00217291,IPI00472011                                                               |
| IPI00217291                                                                                       |
| IPI00029817                                                                                       |
| IPI00384998,IPI00470575,IPI00513695,IPI00513705,IPI00655702,IPI00655890,IPI00656129               |
| IPI00026167                                                                                       |
| IPI00026944                                                                                       |
| IPI00028908                                                                                       |
| IPI00304435                                                                                       |
| IPI00004845                                                                                       |
| IPI00023779,IPI00456663,IPI00456664,IPI00456665,IPI00646277                                       |
| IPI00549467                                                                                       |
| IPI00031753,IPI00220630                                                                           |
| IPI00604590,IPI00795292                                                                           |
| IPI00795292                                                                                       |
| IPI00337541                                                                                       |
| IPI00654555                                                                                       |
| IPI00411937                                                                                       |
| IPI00329352                                                                                       |
| IPI00304596                                                                                       |

|                                                                                                             |
|-------------------------------------------------------------------------------------------------------------|
| IPI00006379                                                                                                 |
| IPI00297655                                                                                                 |
| IPI00029819                                                                                                 |
| IPI00465159                                                                                                 |
| IPI00011140                                                                                                 |
| IPI00017672                                                                                                 |
| IPI00301579                                                                                                 |
| IPI00026216                                                                                                 |
| IPI00549248                                                                                                 |
| IPI00220740,IPI00549248                                                                                     |
| IPI00220562                                                                                                 |
| IPI00787050                                                                                                 |
| IPI00026946                                                                                                 |
| IPI00619898                                                                                                 |
| IPI00012069,IPI00619898,IPI00619966                                                                         |
| IPI00219129,IPI00515016                                                                                     |
| IPI00333776,IPI00655818                                                                                     |
| IPI00333778                                                                                                 |
| IPI00783655                                                                                                 |
| IPI00299594,IPI00398715                                                                                     |
| IPI00165438,IPI00299594,IPI00398715,IPI00549340,IPI00607733,IPI00639917,IPI00749187                         |
| IPI00300890,IPI00641131                                                                                     |
| IPI00006451                                                                                                 |
| IPI00100197,IPI00397571                                                                                     |
| IPI00022830,IPI00100197,IPI00376904,IPI00397571                                                             |
| IPI00376904                                                                                                 |
| IPI00807412                                                                                                 |
| IPI00385236                                                                                                 |
| IPI00295542,IPI00790899                                                                                     |
| IPI00009123,IPI00746961                                                                                     |
| IPI00022145                                                                                                 |
| IPI00550746,IPI00646767,IPI00647418                                                                         |
| IPI00646917                                                                                                 |
| IPI00296913,IPI00646762                                                                                     |
| IPI00031558                                                                                                 |
| IPI00006196,IPI00292771                                                                                     |
| IPI00009901                                                                                                 |
| IPI00328703                                                                                                 |
| IPI00016405                                                                                                 |
| IPI00017841,IPI00419820,IPI00472517,IPI00550145                                                             |
| IPI00184375                                                                                                 |
| IPI00385326                                                                                                 |
| IPI00024621,IPI00607652                                                                                     |
| IPI00006721,IPI00107749,IPI00107750,IPI00107751,IPI00107752,IPI00107753,IPI00375149,IPI00375150,IPI00375151 |
| IPI00329760,IPI00604451,IPI00784387                                                                         |
| IPI00186581                                                                                                 |
| IPI00398855                                                                                                 |
| IPI00000581,IPI00409750                                                                                     |
| IPI00409750                                                                                                 |
| IPI00009923                                                                                                 |
| IPI00010796                                                                                                 |
| IPI00748022,IPI00786945                                                                                     |
| IPI00299000,IPI00794875                                                                                     |

|                                                             |
|-------------------------------------------------------------|
| IPI00796945                                                 |
| IPI00008524,IPI00410017,IPI00478522,IPI00796945             |
| IPI00555747                                                 |
| IPI00005792,IPI00414963                                     |
| IPI00218728                                                 |
| IPI00026546                                                 |
| IPI00014808                                                 |
| IPI00402613,IPI00640518,IPI00647526                         |
| IPI00217223                                                 |
| IPI00656138                                                 |
| IPI00419979                                                 |
| IPI00787208                                                 |
| IPI00177543,IPI00219041,IPI00219042,IPI00219043,IPI00749176 |
| IPI00219042                                                 |
| IPI00001869,IPI00513756                                     |
| IPI00011619                                                 |
| IPI00298547                                                 |
| IPI00449049                                                 |
| IPI00018873,IPI00472879                                     |
| IPI00218568                                                 |
| IPI00016610                                                 |
| IPI00012066,IPI00216689,IPI00796337                         |
| IPI00176458,IPI00215992                                     |
| IPI00645206                                                 |
| IPI00552819                                                 |
| IPI00215946                                                 |
| IPI00009034                                                 |
| IPI00001428                                                 |
| IPI00000495                                                 |
| IPI00294380,IPI00797038                                     |
| IPI00411680,IPI00828189                                     |
| IPI00024989                                                 |
| IPI00021700                                                 |
| IPI00299738                                                 |
| IPI00002543                                                 |
| IPI00301961                                                 |
| IPI00002280                                                 |
| IPI00029131,IPI00643663                                     |
| IPI00165229,IPI00294862                                     |
| IPI00238849                                                 |
| IPI00387168                                                 |
| IPI00013297                                                 |
| IPI00023640                                                 |
| IPI00025277                                                 |
| IPI00246058                                                 |
| IPI00099977                                                 |
| IPI00011865,IPI00018822                                     |
| IPI00006236                                                 |
| IPI00025252,IPI00657680                                     |
| IPI00009904                                                 |
| IPI00299571                                                 |
| IPI00007935                                                 |
| IPI00014850,IPI00643342                                     |

|                                                             |
|-------------------------------------------------------------|
| IPI00219446                                                 |
| IPI00000828                                                 |
| IPI00257882                                                 |
| IPI00004534                                                 |
| IPI00006052                                                 |
| IPI00015891                                                 |
| IPI00643196                                                 |
| IPI00216691                                                 |
| IPI00107555,IPI00219468                                     |
| IPI00219525                                                 |
| IPI00169383                                                 |
| IPI00029997                                                 |
| IPI00550364                                                 |
| IPI00220739                                                 |
| IPI00011200                                                 |
| IPI00299977                                                 |
| IPI00013723                                                 |
| IPI00012575                                                 |
| IPI00059366,IPI00304171,IPI00744148                         |
| IPI00220644                                                 |
| IPI00479186                                                 |
| IPI00024578                                                 |
| IPI00011588                                                 |
| IPI00019590                                                 |
| IPI00296180                                                 |
| IPI00010676,IPI00215706                                     |
| IPI00014898,IPI00186711,IPI00398002                         |
| IPI00398002                                                 |
| IPI00398778                                                 |
| IPI00019580                                                 |
| IPI00027192                                                 |
| IPI00337495,IPI00472165                                     |
| IPI00030255                                                 |
| IPI00002624                                                 |
| IPI00216694                                                 |
| IPI00643034                                                 |
| IPI00044369,IPI00073777,IPI00640599                         |
| IPI00398435,IPI00736693                                     |
| IPI00418458                                                 |
| IPI00018272                                                 |
| IPI00058192                                                 |
| IPI00007960,IPI00218585,IPI00410241,IPI00641231,IPI00797227 |
| IPI00015018                                                 |
| IPI00301109,IPI00413014,IPI00470503,IPI00654717             |
| IPI00419585                                                 |
| IPI00646304                                                 |
| IPI00220188                                                 |
| IPI00026519                                                 |
| IPI00300952                                                 |
| IPI00020950,IPI00216196                                     |
| IPI00103630                                                 |
| IPI00006167                                                 |
| IPI00550451,IPI00794133,IPI00797955                         |

|                                                                         |
|-------------------------------------------------------------------------|
| IPI00218236                                                             |
| IPI00398922                                                             |
| IPI00008380,IPI00815784                                                 |
| IPI00419307,IPI00554737                                                 |
| IPI00019812,IPI00790133                                                 |
| IPI00514424                                                             |
| IPI00002412                                                             |
| IPI00021421,IPI00453232,IPI00552460,IPI00647927,IPI00783249,IPI00789091 |
| IPI00399307                                                             |
| IPI00000874                                                             |
| IPI00027350                                                             |
| IPI00024919                                                             |
| IPI00011937                                                             |
| IPI00024915,IPI00759663                                                 |
| IPI00375306                                                             |
| IPI00220301                                                             |
| IPI00026154,IPI00792916                                                 |
| IPI00296337,IPI00376215                                                 |
| IPI00064328,IPI00441473                                                 |
| IPI00009276                                                             |
| IPI00012540                                                             |
| IPI00294004                                                             |
| IPI00016346                                                             |
| IPI00004968                                                             |
| IPI00305068                                                             |
| IPI00552495                                                             |
| IPI00219617,IPI00718888                                                 |
| IPI00217053,IPI00744319                                                 |
| IPI00011694                                                             |
| IPI00011695,IPI00815665                                                 |
| IPI00026941                                                             |
| IPI00012503,IPI00219825,IPI00744835                                     |
| IPI00744835                                                             |
| IPI00001734,IPI00219478                                                 |
| IPI00028122                                                             |
| IPI00016832,IPI00472442                                                 |
| IPI00219622                                                             |
| IPI00171199,IPI00419249                                                 |
| IPI00795606                                                             |
| IPI00299155,IPI00789638,IPI00790038,IPI00795606                         |
| IPI00789638,IPI00790038                                                 |
| IPI00291922                                                             |
| IPI00029623                                                             |
| IPI00024175                                                             |
| IPI00218372                                                             |
| IPI00025019                                                             |
| IPI00028006                                                             |
| IPI00028004                                                             |
| IPI00555956                                                             |
| IPI00375704,IPI00479306                                                 |
| IPI00003217                                                             |
| IPI00000783                                                             |
| IPI00020042,IPI00216770                                                 |
| IPI00023919,IPI00745502                                                 |

|                                     |
|-------------------------------------|
| IPI00021926                         |
| IPI00299608,IPI00456695             |
| IPI00105598                         |
| IPI00185374,IPI00335069             |
| IPI00375380                         |
| IPI00012268                         |
| IPI00384420                         |
| IPI00011603                         |
| IPI00022694                         |
| IPI00019927                         |
| IPI00479722                         |
| IPI00030154,IPI00479722             |
| IPI00384051,IPI00746205             |
| IPI00103525                         |
| IPI00179964,IPI00183626,IPI00334175 |
| IPI00790462                         |
| IPI00789101                         |
| IPI00015029,IPI00789101,IPI00789698 |
| IPI00022048                         |
| IPI00555762                         |
| IPI00298292                         |
| IPI00008998                         |
| IPI00298347,IPI00658023             |
| IPI00289082                         |
| IPI00375547                         |
| IPI00465186                         |
| IPI00107831,IPI00642154             |
| IPI00011651                         |
| IPI00015756                         |
| IPI00743517                         |
| IPI00748312                         |
| IPI00176903,IPI00513773             |
| IPI00029568                         |
| IPI00219425                         |
| IPI00219426                         |
| IPI00003648                         |
| IPI00215980                         |
| IPI00016112,IPI00787655             |
| IPI00787655                         |
| IPI00004358                         |
| IPI00470525,IPI00783313             |
| IPI00026665                         |
| IPI00003919                         |
| IPI00003590                         |
| IPI00465016                         |
| IPI00376394,IPI00479085,IPI00783371 |
| IPI00020436                         |
| IPI00291928                         |
| IPI00798089                         |
| IPI00016342                         |
| IPI00008219                         |
| IPI00008223                         |
| IPI00749517                         |



|                                                 |
|-------------------------------------------------|
| IPI00011268,IPI00216044                         |
| IPI00793015                                     |
| IPI00792352,IPI00793015                         |
| IPI00796462                                     |
| IPI00643041,IPI00795671,IPI00796462             |
| IPI00414127                                     |
| IPI00221325                                     |
| IPI00026337,IPI00179121,IPI00456728,IPI00456729 |
| IPI00329200,IPI00783829,IPI00793443             |
| IPI00783829,IPI00793443                         |
| IPI00294879,IPI00411570                         |
| IPI00019345,IPI00640287                         |
| IPI00015148                                     |
| IPI00004860,IPI00759723                         |
| IPI00328319,IPI00645329                         |
| IPI00395865                                     |
| IPI00646512                                     |
| IPI00217626                                     |
| IPI00102752,IPI00220716,IPI00220717             |
| IPI00019046,IPI00783867                         |
| IPI00004273                                     |
| IPI00024320,IPI00604407                         |
| IPI00001757,IPI00216659                         |
| IPI00304692                                     |
| IPI00061178                                     |
| IPI00219718                                     |
| IPI00001661,IPI00747309,IPI00787306             |
| IPI00465044                                     |
| IPI00015842                                     |
| IPI00178431                                     |
| IPI00216890                                     |
| IPI00375358,IPI00375359                         |
| IPI00788176                                     |
| IPI00027500                                     |
| IPI00027434,IPI00647268                         |
| IPI00029699                                     |
| IPI00008554                                     |
| IPI00414896                                     |
| IPI00162563                                     |
| IPI00550069                                     |
| IPI00783491                                     |
| IPI00647400                                     |
| IPI00642211                                     |
| IPI00829739                                     |
| IPI00307155                                     |
| IPI00167090                                     |
| IPI00020127                                     |
| IPI00646500                                     |
| IPI00017373                                     |
| IPI00412579,IPI00827508                         |
| IPI00376798,IPI00647168,IPI00647674,IPI00746438 |
| IPI00024933                                     |

|                                                 |
|-------------------------------------------------|
| IPI00555744                                     |
| IPI00413324,IPI00478208,IPI00514874,IPI00644171 |
| IPI00215719                                     |
| IPI00219153                                     |
| IPI00021266,IPI00789159,IPI00793523,IPI00794894 |
| IPI00219155,IPI00382885                         |
| IPI00219156                                     |
| IPI00215790,IPI00792410                         |
| IPI00003918                                     |
| IPI00000494,IPI00797983                         |
| IPI00012772,IPI00795138,IPI00797230             |
| IPI00794884                                     |
| IPI00008530,IPI00556485,IPI00791448             |
| IPI00008527                                     |
| IPI00008529                                     |
| IPI00008438                                     |
| IPI00025091                                     |
| IPI00013917                                     |
| IPI00221089                                     |
| IPI00026271                                     |
| IPI00215780                                     |
| IPI00013485,IPI00479366,IPI00744451,IPI00827598 |
| IPI00012493,IPI00794659                         |
| IPI00017448,IPI00387084,IPI00797280             |
| IPI00793330                                     |
| IPI00179330,IPI00456429,IPI00793330             |
| IPI00011253                                     |
| IPI00419880,IPI00472119                         |
| IPI00217030                                     |
| IPI00008433                                     |
| IPI00013415                                     |
| IPI00216587                                     |
| IPI00413108,IPI00553164                         |
| IPI00220967                                     |
| IPI00215743                                     |
| IPI00013871                                     |
| IPI00027765,IPI00829898                         |
| IPI00021766                                     |
| IPI00021187                                     |
| IPI00009104                                     |
| IPI00183695                                     |
| IPI00013895                                     |
| IPI00023234                                     |
| IPI00646058                                     |
| IPI00005648                                     |
| IPI00514587                                     |
| IPI00021417                                     |
| IPI00006025                                     |
| IPI00306382,IPI00453116,IPI00479205             |
| IPI00177968,IPI00291007,IPI00447020             |
| IPI00009362                                     |
| IPI00292071                                     |
| IPI00008944                                     |

|                                                 |
|-------------------------------------------------|
| IPI00012426                                     |
| IPI00217435,IPI00747808                         |
| IPI00793201                                     |
| IPI00006252,IPI00793201                         |
| IPI00002441                                     |
| IPI00011564                                     |
| IPI00299086,IPI00479018                         |
| IPI00293167                                     |
| IPI00106642                                     |
| IPI00106646                                     |
| IPI00005809                                     |
| IPI00062419                                     |
| IPI00017376                                     |
| IPI00170635                                     |
| IPI00745729                                     |
| IPI00031510                                     |
| IPI00019209                                     |
| IPI00028213,IPI00783087                         |
| IPI00004494                                     |
| IPI00024570                                     |
| IPI00419724                                     |
| IPI00073763                                     |
| IPI00023807                                     |
| IPI00025257                                     |
| IPI00030877                                     |
| IPI00029056                                     |
| IPI00014177,IPI00792151                         |
| IPI00033025                                     |
| IPI00784614,IPI00784936                         |
| IPI00455033,IPI00784614,IPI00784808,IPI00784936 |
| IPI00784808                                     |
| IPI00410693,IPI00412714,IPI00470497,IPI00470498 |
| IPI00412714,IPI00470498                         |
| IPI00553177                                     |
| IPI00027444                                     |
| IPI00007117                                     |
| IPI00783625                                     |
| IPI00032139                                     |
| IPI00009890                                     |
| IPI00006114                                     |
| IPI00291866,IPI00556459                         |
| IPI00032140                                     |
| IPI00016150                                     |
| IPI00072377                                     |
| IPI00301311                                     |
| IPI00419722                                     |
| IPI00018276,IPI00419722,IPI00645828             |
| IPI00386119                                     |
| IPI00017451,IPI00470590                         |
| IPI00017341                                     |
| IPI00029764                                     |
| IPI00026089                                     |

|                                                                         |
|-------------------------------------------------------------------------|
| IPI00221106                                                             |
| IPI00300371                                                             |
| IPI00017339                                                             |
| IPI00010404                                                             |
| IPI00013890                                                             |
| IPI00010740                                                             |
| IPI00749245                                                             |
| IPI00215884,IPI00218591,IPI00218592                                     |
| IPI00218591                                                             |
| IPI00301503,IPI00472633,IPI00555647                                     |
| IPI00005978,IPI00385786,IPI00796848                                     |
| IPI00010204                                                             |
| IPI00003377                                                             |
| IPI00012340,IPI00793205                                                 |
| IPI00414984,IPI00418183                                                 |
| IPI00013949                                                             |
| IPI00010402                                                             |
| IPI00021326                                                             |
| IPI00017480                                                             |
| IPI00002520,IPI00748411,IPI00789370                                     |
| IPI00010949                                                             |
| IPI00069750,IPI00100716,IPI00788826,IPI00797595                         |
| IPI00788826                                                             |
| IPI00296197                                                             |
| IPI00647217                                                             |
| IPI00301364                                                             |
| IPI00019472                                                             |
| IPI00007084                                                             |
| IPI00220194                                                             |
| IPI00008085                                                             |
| IPI00027493,IPI00554481,IPI00554611,IPI00554702,IPI00554722,IPI00604710 |
| IPI00554702,IPI00604710                                                 |
| IPI00221393                                                             |
| IPI00017640                                                             |
| IPI00176398                                                             |
| IPI00008580                                                             |
| IPI00297211                                                             |
| IPI00797830                                                             |
| IPI00234252,IPI00797830                                                 |
| IPI00150057,IPI00216047                                                 |
| IPI00794957                                                             |
| IPI00291939                                                             |
| IPI00219420                                                             |
| IPI00301812,IPI00412898                                                 |
| IPI00412898                                                             |
| IPI00395336                                                             |
| IPI00301528,IPI00395336                                                 |
| IPI00005102                                                             |
| IPI00140420                                                             |
| IPI00219483,IPI00290204                                                 |
| IPI00012382                                                             |
| IPI00027285,IPI00329512,IPI00384173,IPI00395674,IPI00785142,IPI00792592 |
| IPI00029267                                                             |

|                                                 |
|-------------------------------------------------|
| IPI00013396,IPI00641788                         |
| IPI00302850                                     |
| IPI00017963                                     |
| IPI00017964                                     |
| IPI00029266,IPI00068430                         |
| IPI00016572                                     |
| IPI00013830                                     |
| IPI00218733,IPI00783680                         |
| IPI00022314                                     |
| IPI00217930,IPI00218618,IPI00218619,IPI00401958 |
| IPI00216057                                     |
| IPI00022608                                     |
| IPI00217882                                     |
| IPI00376403                                     |
| IPI00011643,IPI00376403                         |
| IPI00005292                                     |
| IPI00006128                                     |
| IPI00021000,IPI00385896                         |
| IPI00306339                                     |
| IPI00478292,IPI00744706,IPI00745092             |
| IPI00745092                                     |
| IPI00744706                                     |
| IPI00005614                                     |
| IPI00783357,IPI00784104                         |
| IPI00143753,IPI00829908                         |
| IPI00019372                                     |
| IPI00789296                                     |
| IPI00293434                                     |
| IPI00009822                                     |
| IPI00642816                                     |
| IPI00289795                                     |
| IPI00004446                                     |
| IPI00782992                                     |
| IPI00168554                                     |
| IPI00009032                                     |
| IPI00005154                                     |
| IPI00032826                                     |
| IPI00001922                                     |
| IPI00009629                                     |
| IPI00013887                                     |
| IPI00020201                                     |
| IPI00000001,IPI00218609,IPI00641873,IPI00643664 |
| IPI00005564                                     |
| IPI00008780                                     |
| IPI00299299                                     |
| IPI00013894                                     |
| IPI00479997,IPI00642012,IPI00643115,IPI00744618 |
| IPI00744618                                     |
| IPI00294536                                     |
| IPI00019971                                     |
| IPI00221222                                     |
| IPI00171412,IPI00334514,IPI00783919,IPI00784010 |
| IPI00334514                                     |

|                                                 |
|-------------------------------------------------|
| IPI00026970                                     |
| IPI00456681,IPI00784161                         |
| IPI00301288                                     |
| IPI00307200                                     |
| IPI00018140,IPI00402182,IPI00402183,IPI00402184 |
| IPI00239405,IPI00239406                         |
| IPI00410127                                     |
| IPI00296215                                     |
| IPI00020194,IPI00294426                         |
| IPI00647915                                     |
| IPI00550363,IPI00647915                         |
| IPI00550488,IPI00744692                         |
| IPI00744692                                     |
| IPI00025815                                     |
| IPI00329633                                     |
| IPI00217236                                     |
| IPI00293126                                     |
| IPI00300341,IPI00645048,IPI00791185,IPI00796346 |
| IPI00026670                                     |
| IPI00247871                                     |
| IPI00219465                                     |
| IPI00290566                                     |
| IPI00294619,IPI00788849                         |
| IPI00021834                                     |
| IPI00009198                                     |
| IPI00022462                                     |
| IPI00000075                                     |
| IPI00235354                                     |
| IPI00018219                                     |
| IPI00304865                                     |
| IPI00294578                                     |
| IPI00296099                                     |
| IPI00329535                                     |
| IPI00328840                                     |
| IPI00549189                                     |
| IPI00104050                                     |
| IPI00794391                                     |
| IPI00005615,IPI00183949,IPI00642600,IPI00644708 |
| IPI00028376                                     |
| IPI00032292,IPI00642739                         |
| IPI00788747                                     |
| IPI00027166,IPI00787781,IPI00788747             |
| IPI00005563                                     |
| IPI00643920,IPI00788802                         |
| IPI00788802                                     |
| IPI00298994,IPI00784273                         |
| IPI00784273                                     |
| IPI00301865,IPI00383814                         |
| IPI00013174                                     |
| IPI00443909                                     |
| IPI00005087                                     |
| IPI00030131                                     |

|                                                                         |
|-------------------------------------------------------------------------|
| IPI00216230                                                             |
| IPI00031008                                                             |
| IPI00298362                                                             |
| IPI00064377                                                             |
| IPI00018880,IPI00796532                                                 |
| IPI00024364                                                             |
| IPI00419856                                                             |
| IPI00015602                                                             |
| IPI00413611                                                             |
| IPI00178667,IPI00218753,IPI00218754,IPI00414101,IPI00478232             |
| IPI00023137,IPI00477672                                                 |
| IPI00301631                                                             |
| IPI00029778,IPI00657708,IPI00742743                                     |
| IPI00218323,IPI00619951,IPI00619958,IPI00782968                         |
| IPI00383670,IPI00472076,IPI00793361                                     |
| IPI00743469                                                             |
| IPI00306825,IPI00399265,IPI00399267,IPI00743469                         |
| IPI00465028,IPI00797687                                                 |
| IPI00014581,IPI00018853,IPI00216135,IPI00296039,IPI00604537,IPI00742825 |
| IPI00220709                                                             |
| IPI00178083,IPI00218319,IPI00479185                                     |
| IPI00479185                                                             |
| IPI00010779                                                             |
| IPI00298237,IPI00554538                                                 |
| IPI00640197                                                             |
| IPI00022970,IPI00742682                                                 |
| IPI00009943                                                             |
| IPI00102661                                                             |
| IPI00030275                                                             |
| IPI00438229,IPI00438230                                                 |
| IPI00301028                                                             |
| IPI00003515                                                             |
| IPI00019450,IPI00642416,IPI00646322,IPI00646813                         |
| IPI00641368                                                             |
| IPI00018768                                                             |
| IPI00030914                                                             |
| IPI00029048                                                             |
| IPI00180675                                                             |
| IPI00792677                                                             |
| IPI00387144,IPI00792677                                                 |
| IPI00218343                                                             |
| IPI00011654                                                             |
| IPI00013475                                                             |
| IPI00031370                                                             |
| IPI00007752                                                             |
| IPI00013683                                                             |
| IPI00023598                                                             |
| IPI00641706                                                             |
| IPI00646779                                                             |
| IPI00183508,IPI00385754                                                 |
| IPI00550917                                                             |
| IPI00410487,IPI00830092                                                 |

|                                                                                                   |
|---------------------------------------------------------------------------------------------------|
| IPI00216298                                                                                       |
| IPI00026328                                                                                       |
| IPI00401264                                                                                       |
| IPI00395646                                                                                       |
| IPI00305692,IPI00642032                                                                           |
| IPI00008552                                                                                       |
| IPI00646689                                                                                       |
| IPI00743646,IPI00830010                                                                           |
| IPI00005613,IPI00619914,IPI00619942                                                               |
| IPI00746657                                                                                       |
| IPI00031556,IPI00746657,IPI00830039                                                               |
| IPI00456429,IPI00719280,IPI00743241,IPI00743650,IPI00744274,IPI00783060,IPI00784990,IPI00789107,I |
| IPI00181306,IPI00514856,IPI00646016                                                               |
| IPI00646016                                                                                       |
| IPI00645078                                                                                       |
| IPI00328154,IPI00375533                                                                           |
| IPI00032957,IPI00450472                                                                           |
| IPI00021347                                                                                       |
| IPI00003949                                                                                       |
| IPI00019599,IPI00019600,IPI00030962,IPI00397947,IPI00447356,IPI00472498                           |
| IPI00797889                                                                                       |
| IPI00071180                                                                                       |
| IPI00024502                                                                                       |
| IPI00018352                                                                                       |
| IPI00219512,IPI00219513,IPI00299313,IPI00549820,IPI00549849,IPI00642374                           |
| IPI00294495                                                                                       |
| IPI00654779                                                                                       |
| IPI00024466,IPI00619903                                                                           |
| IPI00619903                                                                                       |
| IPI00031420                                                                                       |
| IPI00014919,IPI00329331,IPI00395676                                                               |
| IPI00399139                                                                                       |
| IPI00034049,IPI00399170                                                                           |
| IPI00301489                                                                                       |
| IPI00219913                                                                                       |
| IPI00000728                                                                                       |
| IPI00024664,IPI00375145                                                                           |
| IPI00375145                                                                                       |
| IPI00003965,IPI00646721,IPI00783739                                                               |
| IPI00646721                                                                                       |
| IPI00107113                                                                                       |
| IPI00410544,IPI00657807                                                                           |
| IPI00642826                                                                                       |
| IPI00170692                                                                                       |
| IPI00000873,IPI00829641                                                                           |
| IPI00395488,IPI00745461                                                                           |
| IPI00156689                                                                                       |
| IPI00334159                                                                                       |
| IPI00009802,IPI00215628,IPI00215629,IPI00215631                                                   |
| IPI00291175,IPI00307162                                                                           |
| IPI00307162                                                                                       |
| IPI00022774                                                                                       |
| IPI00028076                                                                                       |



|                                                 |
|-------------------------------------------------|
| IPI00069058                                     |
| IPI00218852                                     |
| IPI00746388                                     |
| IPI00418471                                     |
| IPI00020719                                     |
| IPI00180759,IPI00784236,IPI00785025             |
| IPI00170796,IPI00184284,IPI00798102             |
| IPI00018931                                     |
| IPI00216313                                     |
| IPI00396383                                     |
| IPI00394834                                     |
| IPI00412737                                     |
| IPI00295400,IPI00412737                         |
| IPI00746165                                     |
| IPI00216256,IPI00746165                         |
| IPI00019269,IPI00789452                         |
| IPI00012202                                     |
| IPI00291488                                     |
| IPI00001863                                     |
| IPI00022052                                     |
| IPI00013178,IPI00795811                         |
| IPI00298961,IPI00784388                         |
| IPI00220834                                     |
| IPI00465430                                     |
| IPI00012197                                     |
| IPI00183487                                     |
| IPI00432723                                     |
| IPI00216919                                     |
| IPI00007074                                     |
| IPI00031812,IPI00385699,IPI00450235             |
| IPI00450235                                     |
| IPI00031812                                     |
| IPI00013981,IPI00477734                         |
| IPI00008569                                     |
| IPI00216318,IPI00759832                         |
| IPI00000816                                     |
| IPI00220642                                     |
| IPI00216319                                     |
| IPI00018146                                     |
| IPI00021263                                     |
| IPI00333858,IPI00748303                         |
| IPI00013457,IPI00219759,IPI00788670,IPI00792837 |
| IPI00219760                                     |

## Tom Mascot and XI Tai

| Protein molecular weight (AMU) |
|--------------------------------|
| 105381                         |
| 12017.4                        |
| 19044.7                        |
| 21412.7                        |
| 23284.1                        |
| 25228.7                        |
| 26990.8                        |
| 29953.5                        |
| 31421.3                        |
| 34778.2                        |
| 51765.4                        |
| 64161.5                        |
| 67266                          |
| 71135.5                        |
| 42400.1                        |
| 48889.5                        |
| 50167.4                        |
| 12523.4                        |
| 50512.6                        |
| 53375.7                        |
| 31463.9                        |
| 40025.1                        |
| 90085.6                        |
| 26521.2                        |
| 106694.8                       |
| 106795.2                       |
| 67298.4                        |
| 91664.6                        |
| 22328                          |
| 85323.9                        |
| 30966.6                        |
| 41332.3                        |
| 60574.7                        |
| 149700.9                       |
| 151869.9                       |
| 119757.6                       |
| 120824.8                       |
| 27022.1                        |
| 18024.7                        |
| 36581.5                        |
| 42034.1                        |
| 41719.8                        |
| 41775.9                        |
| 105554.2                       |
| 103043.1                       |
| 104839.2                       |
| 44743.7                        |
| 45359.5                        |
| 47353.8                        |

|          |
|----------|
| 40747.1  |
| 84125    |
| 90365.2  |
| 90302    |
| 93003.9  |
| 78525.4  |
| 105020.9 |
| 91908.2  |
| 90538.1  |
| 105339.7 |
| 177655.6 |
| 134043.9 |
| 75531.6  |
| 116265.1 |
| 133188.5 |
| 140751.9 |
| 18818.2  |
| 41582.9  |
| 21481.2  |
| 38686.3  |
| 42136.2  |
| 50079.8  |
| 22220.9  |
| 214820   |
| 53136.8  |
| 47699.1  |
| 312519.1 |
| 38256.4  |
| 66883.5  |
| 37646.6  |
| 26461    |
| 181664.1 |
| 191413.6 |
| 36555.6  |
| 35835.9  |
| 36003.4  |
| 36771.1  |
| 36717.9  |
| 36827.1  |
| 39571    |
| 37188.8  |
| 71686.9  |
| 65085.8  |
| 54844.8  |
| 50361.7  |
| 54831.8  |
| 56274.4  |
| 39402.6  |
| 39438.2  |
| 38981.6  |
| 45196    |
| 120000.5 |
| 28568.1  |

|          |
|----------|
| 28770.6  |
| 30675.3  |
| 62772.6  |
| 38697.9  |
| 54373.7  |
| 40395.3  |
| 35920.6  |
| 130458.5 |
| 81206.1  |
| 35537.7  |
| 58455.7  |
| 72158    |
| 86937    |
| 26668.3  |
| 31657.4  |
| 36135.5  |
| 86923.3  |
| 19590.5  |
| 57193.2  |
| 20679.6  |
| 20583.7  |
| 38581.8  |
| 20309.2  |
| 25813.2  |
| 23189.5  |
| 20438.3  |
| 26886.4  |
| 40931.8  |
| 71702.1  |
| 53789.5  |
| 107826.4 |
| 46487.5  |
| 244495.8 |
| 25585    |
| 85872.6  |
| 32066.1  |
| 50800.3  |
| 64598.5  |
| 7383.7   |
| 112881.5 |
| 112250.7 |
| 31495.7  |
| 114723.8 |
| 59734.1  |
| 56542.5  |
| 12569.9  |
| 52592.9  |
| 26615.3  |
| 38991.1  |
| 68287.4  |
| 56484.1  |
| 50662.1  |
| 158518.3 |

|          |
|----------|
| 98317.2  |
| 34240.6  |
| 13696.9  |
| 37120.7  |
| 37810.1  |
| 37103.8  |
| 47101.4  |
| 45467.9  |
| 43903    |
| 42520.2  |
| 43939.7  |
| 40023.9  |
| 23754.5  |
| 61575.2  |
| 10040.7  |
| 22675.3  |
| 228845.1 |
| 33224.4  |
| 36197    |
| 72867.4  |
| 106107.3 |
| 27800.3  |
| 41637.9  |
| 21977.3  |
| 52544.5  |
| 33411    |
| 82882.5  |
| 70451.2  |
| 16914.1  |
| 33374.7  |
| 46382.3  |
| 29203.1  |
| 35707.3  |
| 61115.4  |
| 17681.4  |
| 37136.7  |
| 20314.7  |
| 13285.2  |
| 30045.1  |
| 89082.9  |
| 195038.5 |
| 12331    |
| 27952.1  |
| 28051.3  |
| 667830.2 |
| 18776.9  |
| 31344.6  |
| 43817.1  |
| 80156.7  |
| 53465.4  |
| 76666.2  |
| 36882.8  |

|          |
|----------|
| 28151.6  |
| 55192.2  |
| 64535.4  |
| 58520    |
| 64656.5  |
| 123335.5 |
| 19090.3  |
| 34205    |
| 20990    |
| 29228.6  |
| 35348.8  |
| 26192.3  |
| 242964.5 |
| 48491.3  |
| 15449.8  |
| 62646    |
| 16820    |
| 48124.9  |
| 38033.9  |
| 37089.6  |
| 54111.1  |
| 136363.1 |
| 44822.1  |
| 67552.2  |
| 51837.5  |
| 81874.6  |
| 32905.1  |
| 32931.2  |
| 33764.2  |
| 31333.6  |
| 15873.6  |
| 94622.2  |
| 81153    |
| 75288.8  |
| 21490.1  |
| 30356.8  |
| 21400.1  |
| 20794    |
| 22207.6  |
| 132805.7 |
| 23884.9  |
| 108158.4 |
| 11007.3  |
| 57471.9  |
| 60446.3  |
| 57908    |
| 59654.3  |
| 58007.3  |
| 59349.8  |
| 59761.2  |
| 161674.2 |
| 40058.6  |
| 57216.1  |

|          |
|----------|
| 55153.7  |
| 39398.2  |
| 76609.9  |
| 81535.4  |
| 41745.7  |
| 48699.2  |
| 21100.3  |
| 25791.8  |
| 25399    |
| 44450.2  |
| 21292.7  |
| 92236.2  |
| 97439.6  |
| 88436.3  |
| 76523.6  |
| 78269.6  |
| 92132.4  |
| 99793.8  |
| 91410.1  |
| 86534.7  |
| 27316.7  |
| 76777.9  |
| 79649.6  |
| 62575.5  |
| 27014.4  |
| 33575.4  |
| 139052.1 |
| 22222.5  |
| 18485.2  |
| 31958.5  |
| 103684.7 |
| 50670.1  |
| 78228.1  |
| 61334.5  |
| 47597.8  |
| 135011.5 |
| 136638.3 |
| 37471.7  |
| 85478.2  |
| 52264.6  |
| 41537.6  |
| 32195.3  |
| 126838.6 |
| 31900.4  |
| 42627.1  |
| 47020    |
| 35676.4  |
| 26905.3  |
| 28755.6  |
| 68242.5  |
| 162231.6 |
| 108623.5 |
| 109773.6 |

|          |
|----------|
| 107001.7 |
| 107015.6 |
| 106080.2 |
| 191600.9 |
| 187876.8 |
| 52477    |
| 25837.9  |
| 18723.3  |
| 19573.2  |
| 52861.7  |
| 33679.6  |
| 36396.6  |
| 113304.8 |
| 59465.3  |
| 315848.4 |
| 333174.2 |
| 153749.1 |
| 160727.7 |
| 167521.7 |
| 163616.6 |
| 183593.6 |
| 144891.6 |
| 108513   |
| 97402.5  |
| 73437.6  |
| 138317.2 |
| 107128   |
| 102471.1 |
| 28779.5  |
| 98370.2  |
| 54216.9  |
| 53232.3  |
| 15927.2  |
| 16756.6  |
| 10174.3  |
| 152915.4 |
| 63657.9  |
| 58616.2  |
| 97378.8  |
| 60113.6  |
| 164924.7 |
| 160867.8 |
| 88471.5  |
| 59193    |
| 63454.5  |
| 54147.5  |
| 20045.6  |
| 24057    |
| 21404.4  |
| 113716.8 |
| 22474.5  |
| 56869    |



|          |
|----------|
| 33853.8  |
| 22887.9  |
| 33759.3  |
| 46284.2  |
| 46545.5  |
| 35189.3  |
| 51695.7  |
| 40071.4  |
| 90537.4  |
| 110403.9 |
| 60101.4  |
| 45263.8  |
| 20549.1  |
| 16343.8  |
| 15781.2  |
| 11121.3  |
| 48340.5  |
| 60941.1  |
| 90939.4  |
| 43742.8  |
| 38072.7  |
| 26206.8  |
| 100054.9 |
| 85479    |
| 77188.8  |
| 107333   |
| 66672.7  |
| 65661.4  |
| 61841.2  |
| 56216.5  |
| 37803.2  |
| 51824.3  |
| 44535    |
| 37546.1  |
| 37311.2  |
| 33850.2  |
| 61743.7  |
| 88914.1  |
| 20906.9  |
| 11283.7  |
| 13060.2  |
| 11954.5  |
| 16676.8  |
| 11731.4  |
| 144772.3 |
| 145168.7 |
| 37228.1  |
| 42008    |
| 42980    |
| 97563.3  |
| 57118.7  |
| 43365    |
| 10026.8  |

|          |
|----------|
| 71406.5  |
| 71579.7  |
| 32798.5  |
| 44802.3  |
| 31103.8  |
| 126972.2 |
| 126952.2 |
| 53877.2  |
| 101111.7 |
| 12694.2  |
| 82415.2  |
| 72354.9  |
| 72540.2  |
| 53957.9  |
| 87328    |
| 49111.7  |
| 73227.7  |
| 102958.9 |
| 90051.5  |
| 117348.1 |
| 69131.7  |
| 36050.9  |
| 42657.9  |
| 22267.7  |
| 36504.5  |
| 92813.4  |
| 146459   |
| 243855.9 |
| 57657.2  |
| 41986.2  |
| 50809.8  |
| 28653.1  |
| 54132.4  |
| 100338.4 |
| 44850.6  |
| 45727.7  |
| 38027.6  |
| 40496.6  |
| 36070.2  |
| 91055.4  |
| 57564.2  |
| 29824.2  |
| 39563    |
| 78455.9  |
| 81861.2  |
| 78084    |
| 79093.2  |
| 98049.9  |
| 53420.6  |
| 32886.1  |
| 82573.6  |
| 62276    |

|          |
|----------|
| 73893.1  |
| 99944.6  |
| 122276.4 |
| 331763.4 |
| 18488.2  |
| 16603.2  |
| 24470.6  |
| 26545.8  |
| 26689    |
| 532346.6 |
| 532387.6 |
| 71309.7  |
| 10348.1  |
| 40667.4  |
| 35798.2  |
| 31370.2  |
| 60655.4  |
| 53747    |
| 50123.2  |
| 50452.6  |
| 24746.2  |
| 28539.9  |
| 71390.3  |
| 19793.1  |
| 50101.4  |
| 95322.1  |
| 54621.1  |
| 26680.4  |
| 23769.2  |
| 26279.4  |
| 37989.4  |
| 109420.1 |
| 40527.6  |
| 61159.6  |
| 12714.9  |
| 36094.7  |
| 38371.7  |
| 51092.2  |
| 29045.3  |
| 25042.4  |
| 36484    |
| 41563.7  |
| 35594    |
| 39128.5  |
| 52204.6  |
| 70886.5  |
| 105329.2 |
| 99084.7  |
| 46137.3  |
| 46385.6  |
| 69208.8  |
| 25079.6  |
| 24906.5  |

|          |
|----------|
| 178140.1 |
| 154870.3 |
| 102348.8 |
| 49205.4  |
| 16814.7  |
| 20152.9  |
| 138786.3 |
| 36074.6  |
| 108886.2 |
| 63906.9  |
| 47152.2  |
| 47251.7  |
| 28914.4  |
| 98987.4  |
| 15516.3  |
| 12958.1  |
| 51141.6  |
| 120661.8 |
| 108248.8 |
| 109842.6 |
| 114767   |
| 52933.1  |
| 170575.2 |
| 94240.3  |
| 12241.3  |
| 54376.7  |
| 28976.9  |
| 31445.6  |
| 20076.3  |
| 68947.8  |
| 86239.4  |
| 82238    |
| 37563.9  |
| 54714.1  |
| 14930.7  |
| 32565.1  |
| 252295.2 |
| 27389.5  |
| 82666.1  |
| 46415.4  |
| 28265.3  |
| 24662.9  |
| 36730.7  |
| 40224.8  |
| 57546.5  |
| 66114.6  |
| 273409.1 |
| 506925.3 |
| 33766.1  |
| 74441.9  |
| 77240.8  |
| 131840.5 |
| 126521.6 |

|          |
|----------|
| 312207   |
| 312283   |
| 314744.5 |
| 48258.8  |
| 42576.2  |
| 234697.6 |
| 23984.7  |
| 26246.4  |
| 91563.3  |
| 54518.7  |
| 54619.8  |
| 33559.3  |
| 44159    |
| 66508.9  |
| 58358.1  |
| 64227.9  |
| 15670.9  |
| 25159.4  |
| 51787.9  |
| 17258.6  |
| 35530.7  |
| 63529.8  |
| 75704.3  |
| 47356.2  |
| 279990.7 |
| 280711.4 |
| 278166.9 |
| 278171.9 |
| 288938.8 |
| 66952.9  |
| 266182.2 |
| 249334.4 |
| 262581   |
| 63555.2  |
| 443604   |
| 351136.8 |
| 54512.3  |
| 37988.6  |
| 34967.3  |
| 27643.9  |
| 93073.4  |
| 74243.3  |
| 95734.2  |
| 67542.6  |
| 68587.1  |
| 53672    |
| 54044.1  |
| 86658.7  |
| 53359.1  |
| 22118.1  |
| 31196.6  |
| 69673.7  |

|          |
|----------|
| 60744.8  |
| 52144.8  |
| 54102.3  |
| 62451.7  |
| 63810.1  |
| 105844.1 |
| 105320.6 |
| 143174.4 |
| 13285.3  |
| 77048.8  |
| 64910.4  |
| 58009.4  |
| 68975.1  |
| 64715.1  |
| 106250.2 |
| 71141.3  |
| 75372.6  |
| 63057.4  |
| 106831   |
| 109422.2 |
| 36035.3  |
| 77514    |
| 107750.4 |
| 74906.6  |
| 65243.7  |
| 59699.7  |
| 80444.9  |
| 20891.8  |
| 72749.8  |
| 30709.3  |
| 292918.6 |
| 45856.2  |
| 50986    |
| 34150.9  |
| 50566.1  |
| 45603.5  |
| 50647.5  |
| 78789.7  |
| 35947.8  |
| 36032.6  |
| 11949.2  |
| 48750.3  |
| 76075.8  |
| 70098.8  |
| 137205.8 |
| 20760.8  |
| 54995.3  |
| 11757.8  |
| 71619.7  |
| 20804.9  |
| 16695.6  |
| 76698.7  |
| 37359.5  |

|          |
|----------|
| 37871.3  |
| 32651.4  |
| 31067.7  |
| 33956    |
| 62066    |
| 46254.7  |
| 44254.2  |
| 81859.5  |
| 47128.2  |
| 39750.8  |
| 46230.1  |
| 47458.6  |
| 61633.3  |
| 62394.5  |
| 62718.3  |
| 63130.5  |
| 72731.8  |
| 78346.4  |
| 133685.8 |
| 139915.9 |
| 67097.6  |
| 77055.6  |
| 25488.2  |
| 25188.8  |
| 19302.2  |
| 35651.1  |
| 36806.7  |
| 63522    |
| 16126.5  |
| 15089.4  |
| 85679.8  |
| 68682.1  |
| 56239.4  |
| 52367.9  |
| 25615    |
| 27549.2  |
| 23338.7  |
| 44727.4  |
| 22469.9  |
| 13491.2  |
| 40042.1  |
| 15310.7  |
| 28841.6  |
| 57394.5  |
| 15239.6  |
| 16185    |
| 25863.5  |
| 28832.9  |
| 18676.7  |
| 65521.5  |
| 25519.7  |
| 22602.5  |
| 141424.1 |

|          |
|----------|
| 60671.8  |
| 63095.3  |
| 49955.7  |
| 13784.1  |
| 17143.7  |
| 119371.7 |
| 22389.1  |
| 16600.4  |
| 22563.7  |
| 21347.8  |
| 22333.3  |
| 14216.2  |
| 14118    |
| 13888.8  |
| 13918.6  |
| 13934.7  |
| 13888.7  |
| 15386.7  |
| 11349.7  |
| 14078    |
| 13971    |
| 21454.5  |
| 13902.7  |
| 15370.7  |
| 102470.4 |
| 102363.3 |
| 40903.2  |
| 40670.1  |
| 40890.2  |
| 40958.2  |
| 40773.7  |
| 41446.2  |
| 40523.2  |
| 40460    |
| 40318.8  |
| 40844.3  |
| 41076.3  |
| 40842.3  |
| 40950.3  |
| 36779.5  |
| 44137.6  |
| 44342.4  |
| 43079.7  |
| 41218    |
| 39312.5  |
| 24876.7  |
| 20147.3  |
| 24016.6  |
| 22962.7  |
| 15996.6  |
| 19898.4  |
| 30822.5  |



|          |
|----------|
| 38828.1  |
| 37412.3  |
| 39577.1  |
| 35949.9  |
| 30570.2  |
| 32320    |
| 33652.5  |
| 46420.6  |
| 27174.1  |
| 45653.8  |
| 49211.8  |
| 51212.1  |
| 49246.1  |
| 36909.6  |
| 47541.6  |
| 50960.5  |
| 48546.6  |
| 64114.8  |
| 77499.3  |
| 73604.5  |
| 70925.8  |
| 90567.2  |
| 88962.3  |
| 95721.7  |
| 85087.2  |
| 61190.7  |
| 24562.2  |
| 54163.3  |
| 69112.8  |
| 98147.1  |
| 84743.6  |
| 83249.3  |
| 92453.7  |
| 70022    |
| 94283    |
| 94470.4  |
| 72405.6  |
| 70881.8  |
| 73617.2  |
| 73663.3  |
| 22764.6  |
| 61037.7  |
| 61195.9  |
| 10913.7  |
| 468787.5 |
| 97442.5  |
| 96847.8  |
| 92099    |
| 14896.8  |
| 48018.9  |
| 51269.3  |
| 45127.1  |
| 111318.8 |

|          |
|----------|
| 144944.4 |
| 57806.5  |
| 97310.9  |
| 51905.7  |
| 118009   |
| 46642.5  |
| 50892.4  |
| 32468.3  |
| 21823.7  |
| 274255.5 |
| 35119.1  |
| 32204.7  |
| 31656.1  |
| 30552    |
| 25303.8  |
| 29111.8  |
| 28986.6  |
| 65014.8  |
| 48742    |
| 21746.7  |
| 45403.8  |
| 23701.2  |
| 103504.9 |
| 43044.7  |
| 95320.9  |
| 74589.9  |
| 42889.2  |
| 83661    |
| 30170.5  |
| 55788.4  |
| 52905.6  |
| 119686.7 |
| 189240.6 |
| 17869.4  |
| 55118.1  |
| 88397.1  |
| 26580.2  |
| 53901.3  |
| 30321.1  |
| 19585.7  |
| 133778   |
| 68032.4  |
| 35683.8  |
| 48210.2  |
| 44010    |
| 72691.2  |
| 73097.6  |
| 251873   |
| 116596.9 |
| 73592.1  |
| 80764.2  |
| 102885.1 |

|          |
|----------|
| 109668.3 |
| 109848.7 |
| 27850.1  |
| 69877.2  |
| 27447.9  |
| 29103.3  |
| 57844.5  |
| 57868.9  |
| 97153.3  |
| 51880.7  |
| 66001.2  |
| 51251    |
| 48805.7  |
| 48041    |
| 44075    |
| 64488    |
| 51401.4  |
| 53688.2  |
| 62113    |
| 156258.3 |
| 52335.3  |
| 139985.2 |
| 337133.7 |
| 343497.2 |
| 400304   |
| 399725.1 |
| 198045.3 |
| 196057.1 |
| 177587.1 |
| 44942.9  |
| 56149.7  |
| 134452.8 |
| 19232.3  |
| 70274.1  |
| 36671.2  |
| 36620.6  |
| 66389    |
| 95356.7  |
| 99981.4  |
| 90599.2  |
| 41756.2  |
| 14697.8  |
| 26170.8  |
| 65314.1  |
| 49393    |
| 85208.3  |
| 45417.7  |
| 45401.8  |
| 56777.4  |
| 57531.2  |
| 40211.5  |
| 74122.7  |
| 65118.1  |

|          |
|----------|
| 66391.6  |
| 69931.4  |
| 65455.4  |
| 50096.1  |
| 17949.7  |
| 35005.8  |
| 14579.8  |
| 33307.4  |
| 23726.6  |
| 28386.2  |
| 121267   |
| 27368    |
| 56143.6  |
| 15146.4  |
| 465453.2 |
| 11231.8  |
| 87000.3  |
| 86705.1  |
| 162701   |
| 65728.2  |
| 319144.5 |
| 53293.8  |
| 521897.7 |
| 105658.4 |
| 63456.7  |
| 34913.4  |
| 89234.6  |
| 86385.2  |
| 58623.5  |
| 10384.6  |
| 71420.9  |
| 65569.2  |
| 69269.1  |
| 60687.8  |
| 35852.5  |
| 139336.6 |
| 165717.2 |
| 47488.6  |
| 46407.4  |
| 38413.5  |
| 46640.9  |
| 47027.6  |
| 620396.9 |
| 670132.1 |
| 40749.4  |
| 34911    |
| 64938    |
| 75358.2  |
| 72988.9  |
| 79563.9  |
| 131071.5 |
| 270602.3 |

|          |
|----------|
| 199522.8 |
| 43422.2  |
| 121002.5 |
| 102888.8 |
| 122925.2 |
| 41373.9  |
| 29981.5  |
| 31536.2  |
| 19510.6  |
| 101099.5 |
| 43642.8  |
| 37533.6  |
| 104756.7 |
| 52892.5  |
| 99952.9  |
| 94608.7  |
| 82035.8  |
| 71588.5  |
| 90964.6  |
| 96542.6  |
| 92872.6  |
| 81291    |
| 226642.8 |
| 36408.9  |
| 35513.7  |
| 15567.3  |
| 64133.4  |
| 26059.9  |
| 155511.2 |
| 50492.3  |
| 48331.7  |
| 20807.2  |
| 43104.9  |
| 51533.1  |
| 61528.6  |
| 64828.8  |
| 84526.8  |
| 19034.5  |
| 213687.7 |
| 42527.4  |
| 12458.5  |
| 55034.9  |
| 358677.8 |
| 206790.4 |
| 53989.9  |
| 54135    |
| 54600.9  |
| 73867.1  |
| 166637.4 |
| 19762.3  |
| 21330.4  |
| 29892.3  |

|          |
|----------|
| 67803.8  |
| 75007.1  |
| 31232.4  |
| 101543.5 |
| 12877.3  |
| 122050.5 |
| 54586.6  |
| 226519.5 |
| 18481.2  |
| 16911.8  |
| 16942.8  |
| 121666.9 |
| 146035.8 |
| 94662.5  |
| 82149.5  |
| 40289.9  |
| 45357    |
| 42993    |
| 34728.9  |
| 101188.9 |
| 62926.2  |
| 85217.5  |
| 89159.4  |
| 93343    |
| 91823.1  |
| 76597.9  |
| 74380.2  |
| 65519.7  |
| 42816.9  |
| 27373.8  |
| 9054     |
| 89586.5  |
| 91147.2  |
| 18839.1  |
| 159999.1 |
| 154286.8 |
| 45449.3  |
| 139864.5 |
| 14155.8  |
| 136433.8 |
| 151376.5 |
| 33292.9  |
| 28448.9  |
| 35878.6  |
| 30590.8  |
| 13238.6  |
| 32624.2  |
| 30119.3  |
| 113881.2 |
| 92958    |
| 66034    |
| 134335.7 |
| 54213.6  |

|          |
|----------|
| 59562.2  |
| 265376.1 |
| 243632   |
| 55681.2  |
| 39142.7  |
| 32533.5  |
| 16552    |
| 103261.1 |
| 32557.4  |
| 29446.9  |
| 47105    |
| 86172.2  |
| 47024    |
| 26905.4  |
| 30851    |
| 25934.8  |
| 144057.7 |
| 130836.5 |
| 131702.5 |
| 103104.6 |
| 72049.8  |
| 101968.9 |
| 82545.4  |
| 40555.2  |
| 37307.8  |
| 28504.6  |
| 37930.9  |
| 66333    |
| 53861.6  |
| 50206.3  |
| 27278.7  |
| 38225.7  |
| 26210.1  |
| 24309.8  |
| 39107.5  |
| 236512.8 |
| 14460.9  |
| 30670.4  |
| 27608.8  |
| 55383.3  |
| 38513.5  |
| 73037.1  |
| 45993.2  |
| 111642.9 |
| 76278.4  |
| 69376.5  |
| 67561.2  |
| 31406.7  |
| 35267.4  |
| 61033.6  |
| 57100.1  |
| 46189.8  |
| 43768.7  |

|          |
|----------|
| 70320.8  |
| 70653.3  |
| 69561.5  |
| 32731.5  |
| 46619.4  |
| 25551.5  |
| 25715.6  |
| 12022.6  |
| 49662.3  |
| 60630.3  |
| 58059.2  |
| 54125.3  |
| 108498.8 |
| 100800.4 |
| 181119.7 |
| 70815.3  |
| 19873.1  |
| 113069.8 |
| 55504.5  |
| 11981.7  |
| 37480.2  |
| 38204.5  |
| 133705.3 |
| 126212.6 |
| 126236   |
| 116446.3 |
| 87604.2  |
| 86405.8  |
| 23737.2  |
| 70619.9  |
| 24632.9  |
| 24661.8  |
| 28751.3  |
| 47954.5  |
| 45699.3  |
| 84135    |
| 27355.2  |
| 70548.2  |
| 101630.8 |
| 105355.5 |
| 74352.6  |
| 20612.8  |
| 14267.3  |
| 21851.1  |
| 96802.5  |
| 39011.3  |
| 42149.4  |
| 41842.9  |
| 56766.6  |
| 72916    |
| 53883.9  |
| 63953    |
| 15023.2  |



|          |
|----------|
| 21038.9  |
| 30770.3  |
| 54529.7  |
| 144645.6 |
| 16629.8  |
| 15296.6  |
| 85299.1  |
| 15036.3  |
| 15070.3  |
| 53123.9  |
| 44597.3  |
| 27529.5  |
| 68267.7  |
| 21654.2  |
| 56632.6  |
| 13814.6  |
| 18225.7  |
| 32095.7  |
| 39472.7  |
| 58044.6  |
| 57919.5  |
| 57132.8  |
| 50061.6  |
| 62898.6  |
| 48507.5  |
| 36959.2  |
| 531707.9 |
| 518449.3 |
| 516455.6 |
| 90549.4  |
| 83534.5  |
| 87082.2  |
| 84768.8  |
| 57175.3  |
| 70795.9  |
| 54723.1  |
| 59565    |
| 211835.7 |
| 83907.7  |
| 29970.2  |
| 43938.2  |
| 93300    |
| 32642.6  |
| 37903.4  |
| 17994.9  |
| 23725.2  |
| 33068.2  |
| 22022.4  |
| 18136.7  |
| 42429.4  |
| 85224.3  |
| 59253.9  |
| 37495.9  |

|          |
|----------|
| 37170.3  |
| 20947.2  |
| 35576.5  |
| 65291.7  |
| 56862.3  |
| 37114.4  |
| 34176    |
| 34207.9  |
| 58083    |
| 22092.9  |
| 21874.4  |
| 27674.7  |
| 30523.1  |
| 22008.3  |
| 17376.4  |
| 25018.1  |
| 59407.7  |
| 469077.5 |
| 71303.7  |
| 30697.3  |
| 97188.4  |
| 75105.4  |
| 30325.8  |
| 55163.3  |
| 106909.7 |
| 24066.4  |
| 34751.5  |
| 48888.7  |
| 26540.1  |
| 28118.8  |
| 42984.4  |
| 58094    |
| 58465.3  |
| 40405.3  |
| 60085.9  |
| 29538    |
| 25880.9  |
| 27629.7  |
| 26265    |
| 29466.8  |
| 26558.4  |
| 26393.3  |
| 27381.5  |
| 27869.1  |
| 20175.6  |
| 26472.5  |
| 22819.5  |
| 22931.6  |
| 29187    |
| 28792.4  |
| 29947.9  |
| 30336.8  |
| 47349.7  |
| 45609.2  |

|          |
|----------|
| 44156.9  |
| 105821.2 |
| 47519.4  |
| 52888.2  |
| 39853.6  |
| 100184.2 |
| 64570.8  |
| 60961.6  |
| 40719.2  |
| 37007.6  |
| 28819.8  |
| 28705.9  |
| 27344.3  |
| 58726.5  |
| 57204.5  |
| 14940.9  |
| 19431.3  |
| 18679.9  |
| 98537.6  |
| 84345.8  |
| 118373.6 |
| 44406.7  |
| 67992.6  |
| 88103.6  |
| 213303.8 |
| 211667.8 |
| 211825.8 |
| 162041.5 |
| 162071.2 |
| 212466.3 |
| 254569.4 |
| 43458.5  |
| 42001.9  |
| 40105.9  |
| 39285.1  |
| 57140    |
| 51340.8  |
| 165257.7 |
| 174439.9 |
| 96680.3  |
| 97134.4  |
| 89640.2  |
| 40859.9  |
| 82560.7  |
| 66843.3  |
| 77739.3  |
| 24471    |
| 23879.6  |
| 20762.7  |
| 23472    |
| 39591.1  |
| 43153.1  |
| 40811.3  |

|          |
|----------|
| 32532.9  |
| 23551.3  |
| 26391.6  |
| 26798.4  |
| 24405.1  |
| 23292.8  |
| 358180.2 |
| 60191.9  |
| 126506.7 |
| 123614.2 |
| 63525.3  |
| 20969.3  |
| 20806.9  |
| 75364    |
| 47637.8  |
| 47802    |
| 52295.8  |
| 102690.5 |
| 107175   |
| 46878.6  |
| 100171.1 |
| 17152.6  |
| 19871.4  |
| 42315.7  |
| 42125.4  |
| 22292.3  |
| 48126.3  |
| 56066.8  |
| 38873.2  |
| 73440    |
| 29321    |
| 128242.4 |
| 30029    |
| 21750.4  |
| 21988.7  |
| 16822.4  |
| 16532.2  |
| 29463.2  |
| 113662.9 |
| 49956.4  |
| 49855.2  |
| 68152.3  |
| 73481.6  |
| 169635.2 |
| 160900.8 |
| 30081.5  |
| 68121    |
| 38791.9  |
| 13551    |
| 24814    |
| 20235.2  |
| 17801.1  |

|          |
|----------|
| 23769.7  |
| 21379.4  |
| 21617.2  |
| 14769.3  |
| 17678.2  |
| 15780.4  |
| 12766.7  |
| 8200.5   |
| 47681.1  |
| 34345.5  |
| 28006.8  |
| 24280.8  |
| 34256.3  |
| 11496.1  |
| 11647.5  |
| 18880.3  |
| 18413.3  |
| 14507.7  |
| 17205.3  |
| 16254.9  |
| 16042.5  |
| 31307.2  |
| 13355    |
| 9093.6   |
| 12234.6  |
| 17947.6  |
| 26670.6  |
| 29927.3  |
| 29581.3  |
| 22859    |
| 22109.5  |
| 24188.4  |
| 33295.5  |
| 152169.3 |
| 152695.7 |
| 90055.5  |
| 28146.2  |
| 130086.8 |
| 50211.4  |
| 51140.1  |
| 11185.5  |
| 11723.1  |
| 71207.2  |
| 102838.1 |
| 107456.4 |
| 61296.8  |
| 90239.1  |
| 109918.3 |
| 38301.6  |
| 56956.6  |
| 70852.7  |
| 52990.2  |
| 23711.9  |

|          |
|----------|
| 50814    |
| 107801.9 |
| 37021.5  |
| 34335    |
| 32458.3  |
| 21624.1  |
| 32427.3  |
| 23007    |
| 66998.8  |
| 41788.9  |
| 47154.9  |
| 34655.2  |
| 86463.1  |
| 27020.6  |
| 53044.8  |
| 88872.8  |
| 85189.8  |
| 89636.9  |
| 89211.5  |
| 86682.2  |
| 92748.7  |
| 92605.3  |
| 96132.9  |
| 74805.7  |
| 18027.4  |
| 42892.5  |
| 41470.1  |
| 50791.3  |
| 65384.3  |
| 47483.9  |
| 64664.3  |
| 44947.8  |
| 42408.9  |
| 46719.9  |
| 42725.8  |
| 46579.6  |
| 42122.1  |
| 42386.3  |
| 43985.2  |
| 46326.4  |
| 55137.5  |
| 46424    |
| 46409.9  |
| 33471.4  |
| 32085.3  |
| 97543    |
| 92438.4  |
| 80603.5  |
| 88868.1  |
| 51457.1  |
| 58833.3  |
| 145802.3 |

|          |
|----------|
| 100211.4 |
| 135561.4 |
| 44368.5  |
| 10117.5  |
| 27756.8  |
| 76131.5  |
| 35368.3  |
| 27727.1  |
| 31980.8  |
| 33648.7  |
| 25459.1  |
| 19312    |
| 27349.5  |
| 25524.9  |
| 52629.2  |
| 34045.9  |
| 23820.2  |
| 62875.9  |
| 49907.6  |
| 55976.7  |
| 58297.3  |
| 59857.6  |
| 54007.1  |
| 52067.8  |
| 117790.3 |
| 18640.3  |
| 56581.8  |
| 74287.3  |
| 54067.3  |
| 94114.2  |
| 57929.4  |
| 64856.9  |
| 73286.6  |
| 167667.5 |
| 95096.1  |
| 14308    |
| 121892.8 |
| 122893.5 |
| 122735.3 |
| 124823.6 |
| 21969.3  |
| 143220.3 |
| 141529.1 |
| 48144.5  |
| 48243.6  |
| 49655.8  |
| 50844.2  |
| 41251.6  |
| 101980.5 |
| 51540.4  |
| 31262.4  |
| 24592.6  |
| 25469.5  |

|          |
|----------|
| 17375.9  |
| 13263.9  |
| 13509.1  |
| 13898.6  |
| 10785.9  |
| 8478.3   |
| 61477.9  |
| 16103.7  |
| 24704.6  |
| 247820.2 |
| 38278.7  |
| 248423.6 |
| 92051.6  |
| 58379.3  |
| 56866.7  |
| 49106.7  |
| 46761.4  |
| 35404.6  |
| 33825.1  |
| 285466.8 |
| 285998.5 |
| 283209.2 |
| 274595.4 |
| 47669.4  |
| 118278.4 |
| 17606.5  |
| 7927.7   |
| 14552.6  |
| 55688.3  |
| 10093.6  |
| 51554.9  |
| 52954.3  |
| 299603.6 |
| 14241.4  |
| 46821    |
| 81059.6  |
| 41314.4  |
| 94751.1  |
| 39057.7  |
| 46588.2  |
| 41278.3  |
| 63165.1  |
| 27603.3  |
| 33230.1  |
| 51910.5  |
| 62624.1  |
| 17285    |
| 15085.2  |
| 38421.4  |
| 66422.7  |
| 14377.9  |
| 33839.4  |
| 37391.5  |



|          |
|----------|
| 119899.4 |
| 199257.8 |
| 390478   |
| 68981.3  |
| 69585.5  |
| 796435.7 |
| 281253.3 |
| 34902.2  |
| 61540.8  |
| 24436.4  |
| 22373.9  |
| 35312.2  |
| 37523.7  |
| 44721.7  |
| 83419.8  |
| 12837.2  |
| 27307.5  |
| 12455.4  |
| 13115.2  |
| 123944   |
| 47433.3  |
| 60327.2  |
| 43416.2  |
| 34998.1  |
| 26916.9  |
| 84855.6  |
| 44324.2  |
| 47731.4  |
| 74664.9  |
| 93482.2  |
| 77311.1  |
| 129363.7 |
| 104181.8 |
| 27540.5  |
| 78822.6  |
| 108650.9 |
| 112429.2 |
| 41571.9  |
| 10980.2  |
| 23153.1  |
| 21647.9  |
| 24381.9  |
| 52369    |
| 67861.4  |
| 67889.5  |
| 271152.8 |
| 269747.1 |
| 110089.4 |
| 69474.3  |
| 20634.5  |
| 39578.1  |
| 50653.4  |

|          |
|----------|
| 75475.8  |
| 240845.2 |
| 46022.2  |
| 46073.3  |
| 50477.4  |
| 102340.8 |
| 100393.1 |
| 67439.2  |
| 90711.7  |
| 183280.2 |
| 37962.5  |
| 46182.3  |
| 213554.2 |
| 19845.3  |
| 22431.2  |
| 23721.7  |
| 22219.9  |
| 30772.8  |
| 32692    |
| 32972.6  |
| 29061.4  |
| 28853    |
| 28504.4  |
| 61229.6  |
| 139750.6 |
| 265846.5 |
| 21508.5  |
| 89376.4  |
| 80094.9  |
| 88531    |
| 52712.2  |
| 227625.5 |
| 60654.1  |
| 37790.4  |
| 26165.4  |
| 30320.2  |
| 74385.7  |
| 50117.7  |
| 46295.5  |
| 50133.7  |
| 49877.4  |
| 49652.6  |
| 49889.1  |
| 49935.1  |
| 49812.7  |
| 50414.7  |
| 49567.5  |
| 45746.4  |
| 50072.4  |
| 43901.5  |
| 39530.8  |
| 24997.8  |

|          |
|----------|
| 11719.3  |
| 19188.4  |
| 46954.5  |
| 43651.1  |
| 32233.4  |
| 37414.8  |
| 13922.4  |
| 65796.6  |
| 27854.2  |
| 53710.4  |
| 53483.1  |
| 14710.9  |
| 112562.2 |
| 37942.8  |
| 117832.3 |
| 51835.4  |
| 17989.5  |
| 17844.3  |
| 17120.6  |
| 25778.9  |
| 16243.7  |
| 59202.6  |
| 63836    |
| 24806.3  |
| 36061.7  |
| 19441    |
| 33303.6  |
| 177176.9 |
| 177361.2 |
| 55007.3  |
| 56932.9  |
| 20436.8  |
| 124328.9 |
| 40769.2  |
| 56052.3  |
| 112405.3 |
| 95770.1  |
| 93291.5  |
| 128256.9 |
| 126254.2 |
| 87961.4  |
| 48134.3  |
| 13741.8  |
| 27875.9  |
| 140459.5 |
| 71696.1  |
| 41901.8  |
| 26518    |
| 372794.6 |
| 116706.3 |
| 123783.3 |
| 89306.8  |
| 46995.8  |

|          |
|----------|
| 67239.9  |
| 92677.2  |
| 69671.9  |
| 53634.7  |
| 56509.9  |
| 75557.7  |
| 20488.1  |
| 91692    |
| 22125.4  |
| 46786.2  |
| 81993.1  |
| 48835.5  |
| 53149.6  |
| 66175.2  |
| 57984.2  |
| 33562.8  |
| 36705.2  |
| 12974.4  |
| 41509.2  |
| 26806    |
| 40868.1  |
| 123370.9 |
| 82689.1  |
| 69855.4  |
| 18663.2  |
| 107553   |
| 96750    |
| 54443.5  |
| 59127.1  |
| 34629    |
| 34652    |
| 35905.8  |
| 60784.7  |
| 22399.8  |
| 28065.1  |
| 29157    |
| 28285.1  |
| 28201.6  |
| 27747.4  |
| 27727.9  |
| 117059.9 |
| 50733.1  |
| 41541.8  |

## ndem searching

| IPI                                                                                             |
|-------------------------------------------------------------------------------------------------|
| IPI00794900                                                                                     |
| IPI00797738                                                                                     |
| IPI00795717                                                                                     |
| IPI00478011                                                                                     |
| IPI00647593                                                                                     |
| IPI00375127                                                                                     |
| IPI00455527                                                                                     |
| IPI00472119                                                                                     |
| IPI00479366                                                                                     |
| IPI00738677                                                                                     |
| IPI00795769                                                                                     |
| IPI00175126                                                                                     |
| IPI00020513,IPI00797866                                                                         |
| IPI00783641                                                                                     |
| IPI00555602                                                                                     |
| IPI00785057                                                                                     |
| IPI00472724                                                                                     |
| IPI00384863                                                                                     |
| IPI00419827                                                                                     |
| IPI00472879                                                                                     |
| IPI00382617                                                                                     |
| IPI00164951,IPI00298454,IPI00477094,IPI00477666,IPI00479567,IPI00479700,IPI00749461,IPI00784621 |
| IPI00789847                                                                                     |
| IPI00169276                                                                                     |
| IPI00784131                                                                                     |
| IPI00027442,IPI00784131                                                                         |
| IPI00303207                                                                                     |
| IPI00013495,IPI00302146,IPI00642960,IPI00792186                                                 |
| IPI00063827,IPI00747859                                                                         |
| IPI00020982,IPI00219832                                                                         |
| IPI00440499                                                                                     |
| IPI00291419                                                                                     |
| IPI00009315                                                                                     |
| IPI00437751                                                                                     |
| IPI00007334                                                                                     |
| IPI00394838                                                                                     |
| IPI00021290                                                                                     |
| IPI00395469                                                                                     |
| IPI00219861                                                                                     |
| IPI00419240                                                                                     |
| IPI00021428                                                                                     |
| IPI00021439                                                                                     |
| IPI00021440                                                                                     |
| IPI00759776                                                                                     |
| IPI00013508                                                                                     |
| IPI00013808                                                                                     |
| IPI00005159,IPI00470573,IPI00749250                                                             |
| IPI00470573                                                                                     |
| IPI00028091                                                                                     |

|                                                 |
|-------------------------------------------------|
| IPI00296441                                     |
| IPI00013897                                     |
| IPI00420069                                     |
| IPI00420067                                     |
| IPI00288894                                     |
| IPI00029606,IPI00288894                         |
| IPI00011901,IPI00249735                         |
| IPI00021903                                     |
| IPI00440932,IPI00747759                         |
| IPI00005908                                     |
| IPI00036578                                     |
| IPI00152639                                     |
| IPI00157513                                     |
| IPI00790458                                     |
| IPI00025057,IPI00025058,IPI00394665             |
| IPI00394668                                     |
| IPI00000027                                     |
| IPI00746777                                     |
| IPI00651738                                     |
| IPI00234368                                     |
| IPI00033030,IPI00470921                         |
| IPI00026833                                     |
| IPI00007427                                     |
| IPI00374563                                     |
| IPI00032220                                     |
| IPI00012007                                     |
| IPI00555610                                     |
| IPI00030706                                     |
| IPI00000690,IPI00157908                         |
| IPI00010460                                     |
| IPI00215901,IPI00218988                         |
| IPI00217683                                     |
| IPI00237884                                     |
| IPI00220271                                     |
| IPI00413641                                     |
| IPI00105407                                     |
| IPI00029733                                     |
| IPI00005668                                     |
| IPI00291483                                     |
| IPI00305978                                     |
| IPI00293721                                     |
| IPI00022434,IPI00745872                         |
| IPI00015102,IPI00783803,IPI00795504,IPI00807403 |
| IPI00218914                                     |
| IPI00296183,IPI00654709,IPI00796116             |
| IPI00333619,IPI00394758                         |
| IPI00479877                                     |
| IPI00465439                                     |
| IPI00418262                                     |
| IPI00022426                                     |
| IPI00153060,IPI00740170                         |
| IPI00032958,IPI00657687,IPI00743594             |
| IPI00025849,IPI00449263                         |

|                                                             |
|-------------------------------------------------------------|
| IPI0007423,IPI00759824                                      |
| IPI00165393,IPI00640833                                     |
| IPI00030431                                                 |
| IPI00218918                                                 |
| IPI00414320                                                 |
| IPI00418169,IPI00455315                                     |
| IPI00329801                                                 |
| IPI00411453,IPI00477622,IPI00719680                         |
| IPI00337741                                                 |
| IPI00215911                                                 |
| IPI00006684,IPI00554742,IPI00555572                         |
| IPI00020012,IPI00796118                                     |
| IPI00031030                                                 |
| IPI00514157                                                 |
| IPI00168479                                                 |
| IPI00021842                                                 |
| IPI00006608,IPI00412681                                     |
| IPI00218693                                                 |
| IPI00514053                                                 |
| IPI00215914,IPI00215917                                     |
| IPI00215917                                                 |
| IPI00216520                                                 |
| IPI00797560                                                 |
| IPI00796541                                                 |
| IPI00003815,IPI00796541                                     |
| IPI00003327                                                 |
| IPI00328748                                                 |
| IPI00005160,IPI00737530                                     |
| IPI00790262                                                 |
| IPI00329685,IPI00744184                                     |
| IPI00165949,IPI00477831                                     |
| IPI00418446                                                 |
| IPI00420014                                                 |
| IPI00024572,IPI00032450,IPI00294834,IPI00783284,IPI00783617 |
| IPI00783284                                                 |
| IPI00555734                                                 |
| IPI00020632                                                 |
| IPI00289499                                                 |
| IPI00010863                                                 |
| IPI00006482                                                 |
| IPI00003021,IPI00302840,IPI00640401,IPI00788782             |
| IPI00008167                                                 |
| IPI00747443                                                 |
| IPI00440493                                                 |
| IPI00303476                                                 |
| IPI00002521,IPI00456008                                     |
| IPI00020430,IPI00784119,IPI00794988                         |
| IPI00168884,IPI00828107                                     |
| IPI00168884                                                 |
| IPI00007682                                                 |
| IPI00007812                                                 |
| IPI00641829                                                 |
| IPI00027235,IPI00478671                                     |

|                                     |
|-------------------------------------|
| IPI00296992,IPI00397361             |
| IPI00166729                         |
| IPI00004656,IPI00796379             |
| IPI00064848                         |
| IPI00477470                         |
| IPI00304331,IPI00477470             |
| IPI00009997                         |
| IPI00217345                         |
| IPI00215767                         |
| IPI00759755                         |
| IPI00746600                         |
| IPI00030128                         |
| IPI00000643                         |
| IPI00641582                         |
| IPI00026087                         |
| IPI00299024                         |
| IPI00010700,IPI00642817             |
| IPI00068254                         |
| IPI00220152                         |
| IPI00025864                         |
| IPI00006079,IPI00413671             |
| IPI00012058                         |
| IPI00010790,IPI00643384             |
| IPI00413587,IPI00420084             |
| IPI00219575                         |
| IPI00294158                         |
| IPI00014021                         |
| IPI00218042                         |
| IPI00301434                         |
| IPI00410214                         |
| IPI00795150                         |
| IPI00019906,IPI00218019,IPI00795150 |
| IPI00026240,IPI00657860             |
| IPI00218413                         |
| IPI00419473                         |
| IPI00013468,IPI00514701,IPI00644108 |
| IPI00003419                         |
| IPI00012236                         |
| IPI00006907                         |
| IPI00064212                         |
| IPI00292150                         |
| IPI00009922                         |
| IPI00792100                         |
| IPI00006980,IPI00792100             |
| IPI00479767                         |
| IPI00056357                         |
| IPI00014230                         |
| IPI00005918                         |
| IPI00296165                         |
| IPI00009793,IPI00795055             |
| IPI00017696                         |
| IPI00009659                         |



|                                                                                     |
|-------------------------------------------------------------------------------------|
| IPI00024913,IPI00218482,IPI00784162,IPI00784277,IPI00793677                         |
| IPI00550689                                                                         |
| IPI00295519,IPI00607570                                                             |
| IPI00165044,IPI00414183                                                             |
| IPI00152148                                                                         |
| IPI00816741                                                                         |
| IPI00007926                                                                         |
| IPI00022381                                                                         |
| IPI00031564                                                                         |
| IPI00218414                                                                         |
| IPI00295105                                                                         |
| IPI00395627,IPI00552308,IPI00745851                                                 |
| IPI00301263                                                                         |
| IPI00003813,IPI00166392                                                             |
| IPI00000914                                                                         |
| IPI00218696,IPI00333771                                                             |
| IPI00075248,IPI00386621,IPI00794543                                                 |
| IPI00020599                                                                         |
| IPI00789155                                                                         |
| IPI00014537,IPI00789155                                                             |
| IPI00172636,IPI00430291,IPI00827573,IPI00827625,IPI00828081,IPI00828139,IPI00828178 |
| IPI00100160,IPI00604431                                                             |
| IPI00103175                                                                         |
| IPI00020984                                                                         |
| IPI00008274                                                                         |
| IPI00011285                                                                         |
| IPI00005969                                                                         |
| IPI00026182                                                                         |
| IPI00218782,IPI00642256                                                             |
| IPI00026185,IPI00218782,IPI00642256                                                 |
| IPI00304409                                                                         |
| IPI00027443,IPI00158625,IPI00556365,IPI00556541                                     |
| IPI00760715,IPI00761035,IPI00761069,IPI00761140,IPI00761160                         |
| IPI00220857,IPI00305750,IPI00760715,IPI00761035,IPI00761069,IPI00761140,IPI00761160 |
| IPI00016746,IPI00024871                                                             |
| IPI00295386                                                                         |
| IPI00010320                                                                         |
| IPI00297579                                                                         |
| IPI00024662                                                                         |
| IPI00217357                                                                         |
| IPI00797903                                                                         |
| IPI00260630                                                                         |
| IPI00009308                                                                         |
| IPI00297779                                                                         |
| IPI00290770,IPI00553185,IPI00744315                                                 |
| IPI00302927                                                                         |
| IPI00010720                                                                         |
| IPI00027626                                                                         |
| IPI00018465                                                                         |
| IPI00302925,IPI00784090                                                             |
| IPI00152540                                                                         |
| IPI00029260                                                                         |
| IPI00410488,IPI00441094,IPI00719044,IPI00793688                                     |

|                                                                                                                         |
|-------------------------------------------------------------------------------------------------------------------------|
| IPI00012788,IPI00645816                                                                                                 |
| IPI00297160,IPI00305064,IPI00418465,IPI00419219,IPI00827650,IPI00827658,IPI00827795,IPI00827893,IPI00827893,IPI00827893 |
| IPI00305064,IPI00418465,IPI00827555,IPI00827650,IPI00827658,IPI00827795,IPI00828056,IPI00828117                         |
| IPI00305064,IPI00418465,IPI00419219,IPI00827555,IPI00827650,IPI00827658,IPI00827795,IPI00827893,IPI00827893,IPI00827893 |
| IPI00219853,IPI00374176,IPI00374177,IPI00398353,IPI00456644                                                             |
| IPI00216550                                                                                                             |
| IPI00031713                                                                                                             |
| IPI00000190                                                                                                             |
| IPI00215997,IPI00657796,IPI00795937                                                                                     |
| IPI00013122                                                                                                             |
| IPI00007189                                                                                                             |
| IPI00465294                                                                                                             |
| IPI00025861,IPI00744889                                                                                                 |
| IPI00295399                                                                                                             |
| IPI00293539                                                                                                             |
| IPI00024046                                                                                                             |
| IPI00290089                                                                                                             |
| IPI00290085                                                                                                             |
| IPI00216677,IPI00645614,IPI00747243                                                                                     |
| IPI00645614,IPI00747243                                                                                                 |
| IPI00014197,IPI00787933                                                                                                 |
| IPI00027486                                                                                                             |
| IPI00099670                                                                                                             |
| IPI00607801                                                                                                             |
| IPI00165972                                                                                                             |
| IPI00007306                                                                                                             |
| IPI00029739                                                                                                             |
| IPI00654723                                                                                                             |
| IPI00012011                                                                                                             |
| IPI00783540                                                                                                             |
| IPI00333010                                                                                                             |
| IPI00746813                                                                                                             |
| IPI00006601                                                                                                             |
| IPI00216738                                                                                                             |
| IPI00301185,IPI00306719                                                                                                 |
| IPI00783390                                                                                                             |
| IPI00299059                                                                                                             |
| IPI00015897                                                                                                             |
| IPI00465319                                                                                                             |
| IPI00478414,IPI00654588                                                                                                 |
| IPI00099831,IPI00554485                                                                                                 |
| IPI00025333,IPI00387130                                                                                                 |
| IPI00216780                                                                                                             |
| IPI00180954,IPI00641579,IPI00646241                                                                                     |
| IPI00022977                                                                                                             |
| IPI00658109                                                                                                             |
| IPI00033466                                                                                                             |
| IPI00010896                                                                                                             |
| IPI00001960                                                                                                             |
| IPI00291930,IPI00397519                                                                                                 |
| IPI00013455,IPI00027172,IPI00217113                                                                                     |
| IPI00007257                                                                                                             |
| IPI00413959                                                                                                             |

|                                     |
|-------------------------------------|
| IPI00005491                         |
| IPI00396423,IPI00747063             |
| IPI00747063                         |
| IPI00024067,IPI00455383             |
| IPI00455383                         |
| IPI00291262,IPI00400826,IPI00795633 |
| IPI00219953                         |
| IPI00430813,IPI00430814             |
| IPI00430812                         |
| IPI00177728,IPI00646632             |
| IPI00015262                         |
| IPI00216682                         |
| IPI00029751                         |
| IPI00012386                         |
| IPI00827558                         |
| IPI00329573                         |
| IPI00828195                         |
| IPI00743696                         |
| IPI00306322                         |
| IPI00472200                         |
| IPI00477611                         |
| IPI00748917                         |
| IPI00291136                         |
| IPI00220613,IPI00304840             |
| IPI00219000                         |
| IPI00295857,IPI00646493             |
| IPI00295851                         |
| IPI00220219                         |
| IPI00399318                         |
| IPI00001890,IPI00783982             |
| IPI00007058                         |
| IPI00008453                         |
| IPI00017704                         |
| IPI00025086                         |
| IPI00216085,IPI00797738             |
| IPI00027078                         |
| IPI00031121                         |
| IPI00640372                         |
| IPI00550308                         |
| IPI00024403                         |
| IPI00011062                         |
| IPI00026219                         |
| IPI00419531                         |
| IPI00012998,IPI00030654             |
| IPI00030654                         |
| IPI00301395                         |
| IPI00027397                         |
| IPI00021997                         |
| IPI00027839                         |
| IPI00009294                         |
| IPI00006034                         |
| IPI00027806                         |

|                                                                                                             |
|-------------------------------------------------------------------------------------------------------------|
| IPI00004838                                                                                                 |
| IPI00305469                                                                                                 |
| IPI00004839                                                                                                 |
| IPI00289561                                                                                                 |
| IPI00220959,IPI00748502,IPI00793277                                                                         |
| IPI00000792,IPI00641565,IPI00647366                                                                         |
| IPI00025366                                                                                                 |
| IPI00031801,IPI00219148                                                                                     |
| IPI00398121,IPI00470891                                                                                     |
| IPI00022744                                                                                                 |
| IPI00015881                                                                                                 |
| IPI00741317                                                                                                 |
| IPI00442073                                                                                                 |
| IPI00305477                                                                                                 |
| IPI00032293                                                                                                 |
| IPI00021828                                                                                                 |
| IPI00011528,IPI00644499                                                                                     |
| IPI00013256,IPI00607841,IPI00744127                                                                         |
| IPI00006122,IPI00515009                                                                                     |
| IPI00007778                                                                                                 |
| IPI00020977                                                                                                 |
| IPI00060423                                                                                                 |
| IPI00215948                                                                                                 |
| IPI00017292,IPI00787027,IPI00787237                                                                         |
| IPI00787237                                                                                                 |
| IPI00182469,IPI00219725,IPI00219728,IPI00219730,IPI00219732,IPI00219734,IPI00219738,IPI00219739,IPI00219741 |
| IPI00290142                                                                                                 |
| IPI00645702                                                                                                 |
| IPI00021794,IPI00640525,IPI00791457                                                                         |
| IPI00640525                                                                                                 |
| IPI00295741                                                                                                 |
| IPI00022810                                                                                                 |
| IPI00011229                                                                                                 |
| IPI00012887                                                                                                 |
| IPI00000013                                                                                                 |
| IPI00002745                                                                                                 |
| IPI00029601,IPI00062884                                                                                     |
| IPI00014312                                                                                                 |
| IPI00034319,IPI00554556,IPI00554634                                                                         |
| IPI00013874                                                                                                 |
| IPI00396257                                                                                                 |
| IPI00292936                                                                                                 |
| IPI00303954                                                                                                 |
| IPI00465315                                                                                                 |
| IPI00644231,IPI00791837                                                                                     |
| IPI00644231,IPI00791837                                                                                     |
| IPI00006273                                                                                                 |
| IPI00299219                                                                                                 |
| IPI00044326                                                                                                 |
| IPI00028911                                                                                                 |
| IPI00216951                                                                                                 |
| IPI00165230,IPI00335930                                                                                     |
| IPI00010182,IPI00218836,IPI00815745                                                                         |

|                                                                                     |
|-------------------------------------------------------------------------------------|
| IPI00003406,IPI00295624                                                             |
| IPI00295624                                                                         |
| IPI00300567                                                                         |
| IPI00220503,IPI00793544                                                             |
| IPI00220342                                                                         |
| IPI00786914                                                                         |
| IPI00293464,IPI00784120,IPI00786914                                                 |
| IPI00025394                                                                         |
| IPI00001477,IPI00219996,IPI00657861                                                 |
| IPI00293867                                                                         |
| IPI00293655                                                                         |
| IPI00023785,IPI00651677                                                             |
| IPI00651653                                                                         |
| IPI00008943,IPI00019918                                                             |
| IPI00015953                                                                         |
| IPI00644431                                                                         |
| IPI00215637                                                                         |
| IPI00409671                                                                         |
| IPI00829889                                                                         |
| IPI00329791                                                                         |
| IPI00017617                                                                         |
| IPI00003482                                                                         |
| IPI00020021                                                                         |
| IPI00306280                                                                         |
| IPI00010882                                                                         |
| IPI00396435                                                                         |
| IPI00742905                                                                         |
| IPI00619921                                                                         |
| IPI00221394                                                                         |
| IPI00003269                                                                         |
| IPI00398918                                                                         |
| IPI00016353                                                                         |
| IPI00015911                                                                         |
| IPI00030351,IPI00218729,IPI00552213,IPI00552376,IPI00552511,IPI00552682,IPI00553029 |
| IPI00012535                                                                         |
| IPI00032406                                                                         |
| IPI00015947                                                                         |
| IPI00008454                                                                         |
| IPI00024523                                                                         |
| IPI00293260                                                                         |
| IPI00006713                                                                         |
| IPI00003438                                                                         |
| IPI00010348                                                                         |
| IPI00333140,IPI00783545                                                             |
| IPI00146935                                                                         |
| IPI00146935,IPI00235412,IPI00473085,IPI00555883                                     |
| IPI00037283                                                                         |
| IPI00033022,IPI00181352,IPI00218889,IPI00477431,IPI00514550,IPI00743573,IPI00794575 |
| IPI00015856,IPI00029820,IPI00658188,IPI00658215                                     |
| IPI00171856                                                                         |
| IPI00020672                                                                         |
| IPI00257508                                                                         |

|                                                 |
|-------------------------------------------------|
| IPI00029111                                     |
| IPI00025846,IPI00220146                         |
| IPI00028931                                     |
| IPI00013933                                     |
| IPI00473014,IPI00643237                         |
| IPI00031045,IPI00473014,IPI00643237             |
| IPI00793322                                     |
| IPI00749113                                     |
| IPI00013679,IPI00749113,IPI00793322             |
| IPI00477531                                     |
| IPI00456969,IPI00477531                         |
| IPI00827859                                     |
| IPI00019329                                     |
| IPI00745955                                     |
| IPI00011416                                     |
| IPI00024993                                     |
| IPI00003351,IPI00645849                         |
| IPI00306046,IPI00399105                         |
| IPI00396485                                     |
| IPI00014424                                     |
| IPI00178440                                     |
| IPI00064086                                     |
| IPI00642971                                     |
| IPI00003588                                     |
| IPI00000875,IPI00747497                         |
| IPI00186290                                     |
| IPI00029658,IPI00220813,IPI00220814,IPI00220815 |
| IPI00060181                                     |
| IPI00025840                                     |
| IPI00005517                                     |
| IPI00024307                                     |
| IPI00003519                                     |
| IPI00028381                                     |
| IPI00005578                                     |
| IPI00015077                                     |
| IPI00219678                                     |
| IPI00021728,IPI00793912                         |
| IPI00297982                                     |
| IPI00290461                                     |
| IPI00033143                                     |
| IPI00012795                                     |
| IPI00647650                                     |
| IPI00290460                                     |
| IPI00654777                                     |
| IPI00013068                                     |
| IPI00465233                                     |
| IPI00016910,IPI00646839                         |
| IPI00747447                                     |
| IPI00025491                                     |
| IPI00328328,IPI00409717                         |
| IPI00012079,IPI00439415                         |
| IPI00027485                                     |
| IPI00783643,IPI00788723                         |

|                                                                                                             |
|-------------------------------------------------------------------------------------------------------------|
| IPI00220365,IPI00384463,IPI00479262,IPI00798400                                                             |
| IPI00386533                                                                                                 |
| IPI00015952                                                                                                 |
| IPI00022648                                                                                                 |
| IPI00411704                                                                                                 |
| IPI00376005,IPI00411704                                                                                     |
| IPI00299254                                                                                                 |
| IPI00301936                                                                                                 |
| IPI00001466                                                                                                 |
| IPI00374054,IPI00411623,IPI00646954                                                                         |
| IPI00465248                                                                                                 |
| IPI00216171                                                                                                 |
| IPI00038378,IPI00795241                                                                                     |
| IPI00156171,IPI00303210                                                                                     |
| IPI00470835                                                                                                 |
| IPI00220797,IPI00383552,IPI00410177,IPI00410178,IPI00410179,IPI00410180,IPI00410181,IPI00470835,IPI00478478 |
| IPI00478478                                                                                                 |
| IPI00032230                                                                                                 |
| IPI00745296                                                                                                 |
| IPI00008318                                                                                                 |
| IPI00008290,IPI00215945                                                                                     |
| IPI00009896                                                                                                 |
| IPI00013452                                                                                                 |
| IPI00163849,IPI00645613,IPI00646339,IPI00794004,IPI00795804,IPI00797124                                     |
| IPI00029631                                                                                                 |
| IPI00386755                                                                                                 |
| IPI00024911                                                                                                 |
| IPI00411706                                                                                                 |
| IPI00015186                                                                                                 |
| IPI00009841,IPI00065554                                                                                     |
| IPI00293128                                                                                                 |
| IPI00004047,IPI00414468                                                                                     |
| IPI00002732,IPI00790204                                                                                     |
| IPI00019576,IPI00797559                                                                                     |
| IPI00607735,IPI00644969                                                                                     |
| IPI00001754,IPI00069985,IPI00294993                                                                         |
| IPI00022937                                                                                                 |
| IPI00218038                                                                                                 |
| IPI00456750,IPI00647286                                                                                     |
| IPI00006657                                                                                                 |
| IPI00790820                                                                                                 |
| IPI00021923                                                                                                 |
| IPI00303318,IPI00789253                                                                                     |
| IPI00030098                                                                                                 |
| IPI00031820                                                                                                 |
| IPI00300074                                                                                                 |
| IPI00645907                                                                                                 |
| IPI00031411                                                                                                 |
| IPI00025039                                                                                                 |
| IPI00296537                                                                                                 |
| IPI00296534                                                                                                 |
| IPI00465038                                                                                                 |
| IPI00023824,IPI00465038                                                                                     |

|                                                                                                             |
|-------------------------------------------------------------------------------------------------------------|
| IPI00784458                                                                                                 |
| IPI00328113,IPI00784458                                                                                     |
| IPI00019439,IPI00784315                                                                                     |
| IPI00101405,IPI00797614                                                                                     |
| IPI00026215                                                                                                 |
| IPI00021048,IPI00216269,IPI00645867,IPI00790914,IPI00827894                                                 |
| IPI00032908                                                                                                 |
| IPI00021399                                                                                                 |
| IPI00328245                                                                                                 |
| IPI00296561                                                                                                 |
| IPI00296053,IPI00759715                                                                                     |
| IPI00014398,IPI00647207                                                                                     |
| IPI00396967,IPI00743342                                                                                     |
| IPI00395337,IPI00657863                                                                                     |
| IPI00008449,IPI00395337,IPI00657863,IPI00658114                                                             |
| IPI00303300                                                                                                 |
| IPI00413778                                                                                                 |
| IPI00024157                                                                                                 |
| IPI00219005                                                                                                 |
| IPI00059292,IPI00219306                                                                                     |
| IPI00305010                                                                                                 |
| IPI00002191                                                                                                 |
| IPI00002408                                                                                                 |
| IPI00167710                                                                                                 |
| IPI00302592                                                                                                 |
| IPI00333541                                                                                                 |
| IPI00480131                                                                                                 |
| IPI00289334,IPI00382696,IPI00382697,IPI00382700,IPI00477536,IPI00480131                                     |
| IPI00783128                                                                                                 |
| IPI00215720,IPI00215721,IPI00215723,IPI00215724,IPI00215725,IPI00412343,IPI00645666,IPI00783298,IPI00470919 |
| IPI00470919                                                                                                 |
| IPI00744362                                                                                                 |
| IPI00022418                                                                                                 |
| IPI00015580,IPI00028718,IPI00607808,IPI00646028,IPI00807364                                                 |
| IPI00329327                                                                                                 |
| IPI00180707                                                                                                 |
| IPI00163187,IPI00747810                                                                                     |
| IPI00021081,IPI00217070,IPI00217071                                                                         |
| IPI00029723                                                                                                 |
| IPI00025155                                                                                                 |
| IPI00477747                                                                                                 |
| IPI00298956                                                                                                 |
| IPI00008087                                                                                                 |
| IPI00375441,IPI00644386,IPI00788671                                                                         |
| IPI00788671                                                                                                 |
| IPI00745745                                                                                                 |
| IPI00012440                                                                                                 |
| IPI00018387                                                                                                 |
| IPI00260715                                                                                                 |
| IPI00646643                                                                                                 |
| IPI00412643,IPI00786930                                                                                     |
| IPI00016249,IPI00554715                                                                                     |



|                                     |
|-------------------------------------|
| IPI00554715                         |
| IPI00012442                         |
| IPI00009057                         |
| IPI00760751                         |
| IPI00216008,IPI00289800,IPI00760751 |
| IPI00293088                         |
| IPI00783446                         |
| IPI00298949                         |
| IPI00026637                         |
| IPI00008790                         |
| IPI00183321                         |
| IPI00029605                         |
| IPI00375205                         |
| IPI00004669                         |
| IPI00005401                         |
| IPI00026991                         |
| IPI00328391                         |
| IPI00166613                         |
| IPI00472068                         |
| IPI00011454                         |
| IPI00219018                         |
| IPI00783097                         |
| IPI00025273                         |
| IPI00032532,IPI00412410,IPI00412412 |
| IPI00103554                         |
| IPI00021807,IPI00759616             |
| IPI00296635                         |
| IPI00306140                         |
| IPI00215768                         |
| IPI00010090                         |
| IPI00001159                         |
| IPI00166086                         |
| IPI00465184                         |
| IPI00306543                         |
| IPI00010154                         |
| IPI00640006                         |
| IPI00031461                         |
| IPI00217952                         |
| IPI00023728                         |
| IPI00024705                         |
| IPI00554793                         |
| IPI00025869                         |
| IPI00441344,IPI00797646             |
| IPI00433284                         |
| IPI00414717,IPI00641153             |
| IPI00220766                         |
| IPI00007102                         |
| IPI00219025                         |
| IPI00168262                         |
| IPI00018236                         |
| IPI00412987,IPI00549557             |
| IPI00029079                         |
| IPI00026268                         |

|                                                                                                             |
|-------------------------------------------------------------------------------------------------------------|
| IPI00641950                                                                                                 |
| IPI00009305                                                                                                 |
| IPI00550894,IPI00744859                                                                                     |
| IPI00000137                                                                                                 |
| IPI00012102                                                                                                 |
| IPI00171411,IPI00759659,IPI00784293                                                                         |
| IPI00759659,IPI00784293                                                                                     |
| IPI00004962                                                                                                 |
| IPI00743931                                                                                                 |
| IPI00031241,IPI00743931                                                                                     |
| IPI00219029                                                                                                 |
| IPI00018206                                                                                                 |
| IPI00015688                                                                                                 |
| IPI00232571                                                                                                 |
| IPI00001755                                                                                                 |
| IPI00027497                                                                                                 |
| IPI00030910,IPI00639921                                                                                     |
| IPI00150961,IPI00783872                                                                                     |
| IPI00651640                                                                                                 |
| IPI00217481,IPI00423340,IPI00423342,IPI00651640,IPI00651770                                                 |
| IPI00006166                                                                                                 |
| IPI00397949,IPI00412420,IPI00783104                                                                         |
| IPI00026199                                                                                                 |
| IPI00021327                                                                                                 |
| IPI00328709                                                                                                 |
| IPI00037448,IPI00550682                                                                                     |
| IPI00550682                                                                                                 |
| IPI00296713                                                                                                 |
| IPI00011722,IPI00218672,IPI00647318                                                                         |
| IPI00218671                                                                                                 |
| IPI00026314                                                                                                 |
| IPI00218829                                                                                                 |
| IPI00016862                                                                                                 |
| IPI00010706                                                                                                 |
| IPI00657682                                                                                                 |
| IPI00019755,IPI00642936                                                                                     |
| IPI00219757                                                                                                 |
| IPI00290416                                                                                                 |
| IPI00021924                                                                                                 |
| IPI00018278,IPI00218448                                                                                     |
| IPI00220994                                                                                                 |
| IPI00219038,IPI00413826                                                                                     |
| IPI00745553                                                                                                 |
| IPI00021808                                                                                                 |
| IPI00410714                                                                                                 |
| IPI00217471,IPI00220706,IPI00473011,IPI00654755,IPI00657660,IPI00657911,IPI00784636,IPI00796636,IPI00796636 |
| IPI00740800                                                                                                 |
| IPI00453476,IPI00549725                                                                                     |
| IPI00176610,IPI00741006                                                                                     |
| IPI00289601                                                                                                 |
| IPI00514330                                                                                                 |
| IPI00007063                                                                                                 |
| IPI00022228                                                                                                 |

|                                                                                                             |
|-------------------------------------------------------------------------------------------------------------|
| IPI00027851,IPI00829779                                                                                     |
| IPI00012585                                                                                                 |
| IPI00303174                                                                                                 |
| IPI00239077                                                                                                 |
| IPI00000335                                                                                                 |
| IPI00024417,IPI00784470,IPI00788073,IPI00792558                                                             |
| IPI00021370,IPI00784038                                                                                     |
| IPI00019894,IPI00021370,IPI00784038                                                                         |
| IPI00217468                                                                                                 |
| IPI00217465                                                                                                 |
| IPI00217466                                                                                                 |
| IPI00045109,IPI00219037                                                                                     |
| IPI00026272                                                                                                 |
| IPI00081836,IPI00102165,IPI00216457,IPI00220855,IPI00255316,IPI00291764,IPI00339274,IPI00552873             |
| IPI00152906,IPI00303133,IPI00329665,IPI00719084,IPI00794461                                                 |
| IPI00018534,IPI00020101,IPI00152906,IPI00303133,IPI00329665,IPI00419833,IPI00477495,IPI00554798,IPI00554799 |
| IPI00152785                                                                                                 |
| IPI00465070                                                                                                 |
| IPI00453473                                                                                                 |
| IPI00216457,IPI00339274                                                                                     |
| IPI00339274                                                                                                 |
| IPI00454695,IPI00746251                                                                                     |
| IPI00003935,IPI00152785,IPI00166293,IPI00220403,IPI00515061                                                 |
| IPI00171611,IPI00719351                                                                                     |
| IPI00018246                                                                                                 |
| IPI00102864                                                                                                 |
| IPI00644631                                                                                                 |
| IPI00742968                                                                                                 |
| IPI00472882                                                                                                 |
| IPI00760554                                                                                                 |
| IPI00472736                                                                                                 |
| IPI00472112,IPI00472448                                                                                     |
| IPI00471955,IPI00472284,IPI00472456,IPI00646083,IPI00655604,IPI00718924,IPI00744375,IPI00744689,IPI00744690 |
| IPI00472284                                                                                                 |
| IPI00472138,IPI00655604,IPI00747198                                                                         |
| IPI00471951,IPI00816057                                                                                     |
| IPI00472605                                                                                                 |
| IPI00651697                                                                                                 |
| IPI00473131                                                                                                 |
| IPI00472035,IPI00745649                                                                                     |
| IPI00789627                                                                                                 |
| IPI00795906                                                                                                 |
| IPI00107380                                                                                                 |
| IPI00004672                                                                                                 |
| IPI00028160,IPI00219877                                                                                     |
| IPI00419258,IPI00644653,IPI00645948,IPI00815806                                                             |
| IPI00815806                                                                                                 |
| IPI00219097                                                                                                 |
| IPI00217477,IPI00411540,IPI00640781,IPI00643317                                                             |
| IPI00007764,IPI00384857                                                                                     |
| IPI00384857                                                                                                 |
| IPI00011913                                                                                                 |

|                                     |
|-------------------------------------|
| IPI00215965,IPI00465365,IPI00797148 |
| IPI00396378                         |
| IPI00419373                         |
| IPI00334587,IPI00334713,IPI00742926 |
| IPI00334713                         |
| IPI00216592                         |
| IPI00477313                         |
| IPI00011274,IPI00045498             |
| IPI00045498                         |
| IPI00003881                         |
| IPI00013881                         |
| IPI00479191                         |
| IPI00026230                         |
| IPI00013877,IPI00216493             |
| IPI00514561,IPI00807545             |
| IPI00216049,IPI00216746,IPI00807545 |
| IPI00807545                         |
| IPI00027834,IPI00796199             |
| IPI00171903,IPI00383296             |
| IPI00383296                         |
| IPI00012074,IPI00644055             |
| IPI00644079                         |
| IPI00479217                         |
| IPI00013070,IPI00167147             |
| IPI00456887,IPI00827583             |
| IPI00296291,IPI00642238,IPI00744429 |
| IPI00218493                         |
| IPI00304693,IPI00607616,IPI00736669 |
| IPI00157454,IPI00160316,IPI00395692 |
| IPI00382470                         |
| IPI00334775                         |
| IPI00414676                         |
| IPI00027230                         |
| IPI00304925                         |
| IPI00002966                         |
| IPI00295485,IPI00828021             |
| IPI00003362                         |
| IPI00003865                         |
| IPI00788958                         |
| IPI00007765                         |
| IPI00025512                         |
| IPI00784154                         |
| IPI00472102                         |
| IPI00220362                         |
| IPI00024284                         |
| IPI00796127                         |
| IPI00514983                         |
| IPI00218993,IPI00514983             |
| IPI00383665                         |
| IPI00643586                         |
| IPI00003176                         |
| IPI00168847,IPI00178140,IPI00654773 |
| IPI00000877                         |

|                                                             |
|-------------------------------------------------------------|
| IPI00644127                                                 |
| IPI00008494                                                 |
| IPI00290456                                                 |
| IPI00790218                                                 |
| IPI00220373                                                 |
| IPI00027223                                                 |
| IPI00011107                                                 |
| IPI00220014                                                 |
| IPI00433029                                                 |
| IPI00289819                                                 |
| IPI00297284                                                 |
| IPI00556155                                                 |
| IPI00018305,IPI00556155                                     |
| IPI00029236                                                 |
| IPI00029235                                                 |
| IPI00016915                                                 |
| IPI00291987                                                 |
| IPI00056478                                                 |
| IPI00020354,IPI00647552                                     |
| IPI00002316                                                 |
| IPI00021382                                                 |
| IPI00007793                                                 |
| IPI00297124                                                 |
| IPI00005198                                                 |
| IPI00298788,IPI00418313                                     |
| IPI00219330                                                 |
| IPI00006164                                                 |
| IPI00009960,IPI00554469                                     |
| IPI00020906                                                 |
| IPI00291510                                                 |
| IPI00005944                                                 |
| IPI00007402,IPI00784008                                     |
| IPI00009342                                                 |
| IPI00375631                                                 |
| IPI00478861,IPI00549569,IPI00640098,IPI00644161,IPI00645069 |
| IPI00645194                                                 |
| IPI00010105                                                 |
| IPI00640865                                                 |
| IPI00031821                                                 |
| IPI00375446                                                 |
| IPI00099650                                                 |
| IPI00014238,IPI00307092                                     |
| IPI00060715                                                 |
| IPI00008575,IPI00082310,IPI00385834,IPI00479209             |
| IPI00082310                                                 |
| IPI00298363                                                 |
| IPI00479786                                                 |
| IPI00641384                                                 |
| IPI00472754,IPI00749513                                     |
| IPI00448751                                                 |
| IPI00015504                                                 |
| IPI00783537                                                 |

|                                                 |
|-------------------------------------------------|
| IPI00012837                                     |
| IPI00022296                                     |
| IPI00220142                                     |
| IPI00394906                                     |
| IPI00002818,IPI00218137                         |
| IPI00793215                                     |
| IPI00002214                                     |
| IPI00012578                                     |
| IPI00001639                                     |
| IPI00140177,IPI00218929,IPI00651704             |
| IPI00220327                                     |
| IPI00217963                                     |
| IPI00554788,IPI00784347                         |
| IPI00784347                                     |
| IPI00479145                                     |
| IPI00290857                                     |
| IPI00306959                                     |
| IPI00554648                                     |
| IPI00019359                                     |
| IPI00328753,IPI00337736                         |
| IPI00003818                                     |
| IPI00027087,IPI00334532,IPI00646281             |
| IPI00375294                                     |
| IPI00218725,IPI00479834                         |
| IPI00641693                                     |
| IPI00783665                                     |
| IPI00013976                                     |
| IPI00296922                                     |
| IPI00298281                                     |
| IPI00009030,IPI00216172,IPI00739827             |
| IPI00419237                                     |
| IPI00103994                                     |
| IPI00009650                                     |
| IPI00010471                                     |
| IPI00217966                                     |
| IPI00219217                                     |
| IPI00792252                                     |
| IPI00000070,IPI00792252                         |
| IPI00032491                                     |
| IPI00045839                                     |
| IPI00455739                                     |
| IPI00219219                                     |
| IPI00465431                                     |
| IPI00023673                                     |
| IPI00293303                                     |
| IPI00008918,IPI00220465,IPI00796222,IPI00796705 |
| IPI00748567                                     |
| IPI00007207,IPI00446007,IPI00748567             |
| IPI00005686                                     |
| IPI00026530                                     |
| IPI00009950                                     |
| IPI00021405,IPI00216953                         |
| IPI00216952                                     |

|                                                             |
|-------------------------------------------------------------|
| IPI00217975                                                 |
| IPI00009771                                                 |
| IPI00169285                                                 |
| IPI00377047                                                 |
| IPI00397808                                                 |
| IPI00399212,IPI00414127                                     |
| IPI00456898                                                 |
| IPI00027378                                                 |
| IPI00217477,IPI00376756,IPI00411540,IPI00640781,IPI00643317 |
| IPI00183920,IPI00297477                                     |
| IPI00740545                                                 |
| IPI00014263,IPI00220894                                     |
| IPI00788271                                                 |
| IPI00007797                                                 |
| IPI00786995                                                 |
| IPI00028109                                                 |
| IPI00294839,IPI00782994                                     |
| IPI00782994                                                 |
| IPI00183445,IPI00410210                                     |
| IPI00023704                                                 |
| IPI00002255,IPI00477088                                     |
| IPI00045841                                                 |
| IPI00024292                                                 |
| IPI00005774                                                 |
| IPI00170935                                                 |
| IPI00396321                                                 |
| IPI00785113                                                 |
| IPI00006207,IPI00382733                                     |
| IPI00328716                                                 |
| IPI00219871                                                 |
| IPI00409640,IPI00409641,IPI00641640                         |
| IPI00328218,IPI00409640,IPI00409641,IPI00641640             |
| IPI00219077,IPI00514090                                     |
| IPI00514090                                                 |
| IPI00292657                                                 |
| IPI00073196,IPI00398794                                     |
| IPI00783492                                                 |
| IPI00006932                                                 |
| IPI00216804                                                 |
| IPI00020986,IPI00794403                                     |
| IPI00301459                                                 |
| IPI00303882                                                 |
| IPI00256861,IPI00478226,IPI00513991,IPI00550385,IPI00744472 |
| IPI00432363,IPI00514468                                     |
| IPI00301104                                                 |
| IPI00018042                                                 |
| IPI00009542,IPI00477809                                     |
| IPI00439446                                                 |
| IPI00009145                                                 |
| IPI00008207                                                 |
| IPI00003802                                                 |
| IPI00008868                                                 |

|                                                             |
|-------------------------------------------------------------|
| IPI00003842,IPI00010728,IPI00472094                         |
| IPI00219604                                                 |
| IPI00396171,IPI00745518                                     |
| IPI00220113,IPI00396171,IPI00745518                         |
| IPI00745518                                                 |
| IPI00003479                                                 |
| IPI00017596                                                 |
| IPI00219301                                                 |
| IPI00641181                                                 |
| IPI00008240                                                 |
| IPI00010157                                                 |
| IPI00002324,IPI00181717                                     |
| IPI00168520,IPI00473118,IPI00554542                         |
| IPI00005690                                                 |
| IPI00789551                                                 |
| IPI00017297,IPI00789551                                     |
| IPI00397466                                                 |
| IPI00016334                                                 |
| IPI00013214                                                 |
| IPI00018349                                                 |
| IPI00031517                                                 |
| IPI00299904,IPI00376143                                     |
| IPI00552897                                                 |
| IPI00291005                                                 |
| IPI00291006                                                 |
| IPI00010333                                                 |
| IPI00008215                                                 |
| IPI00399089                                                 |
| IPI00029273,IPI00294528,IPI00792387                         |
| IPI00300763,IPI00789396                                     |
| IPI00789396                                                 |
| IPI00022621,IPI00644827                                     |
| IPI00002236                                                 |
| IPI00025809                                                 |
| IPI00016743                                                 |
| IPI00395751,IPI00744230                                     |
| IPI00020407                                                 |
| IPI00298618                                                 |
| IPI00374065,IPI00455473,IPI00739902,IPI00740837,IPI00741107 |
| IPI00640150,IPI00647961                                     |
| IPI00293276                                                 |
| IPI00293748                                                 |
| IPI00004233                                                 |
| IPI00023461,IPI00759546                                     |
| IPI00008561                                                 |
| IPI00013405                                                 |
| IPI00306778                                                 |
| IPI00027780                                                 |
| IPI00005707                                                 |
| IPI00033494,IPI00220573,IPI00604523                         |
| IPI00005537                                                 |
| IPI00154975                                                 |



|                                                                                                             |
|-------------------------------------------------------------------------------------------------------------|
| IPI00219365                                                                                                 |
| IPI00171798                                                                                                 |
| IPI00011876                                                                                                 |
| IPI00218342,IPI00794900                                                                                     |
| IPI00179589                                                                                                 |
| IPI00013955,IPI00218163,IPI00218164,IPI00218165,IPI00218169,IPI00218170,IPI00385173,IPI00607569,IPI00011448 |
| IPI00019502                                                                                                 |
| IPI00797001                                                                                                 |
| IPI00335168,IPI00413922,IPI00744444,IPI00789605,IPI00795576,IPI00796366,IPI00797001,IPI00797626             |
| IPI00789605                                                                                                 |
| IPI00743335                                                                                                 |
| IPI00008455,IPI00069126,IPI00642722,IPI00816452,IPI00816461                                                 |
| IPI00023748,IPI00797126                                                                                     |
| IPI00008787                                                                                                 |
| IPI00147874                                                                                                 |
| IPI00023860,IPI00789029,IPI00791065,IPI00793389                                                             |
| IPI00017763                                                                                                 |
| IPI00293817                                                                                                 |
| IPI00032158,IPI00386189                                                                                     |
| IPI00306960,IPI00646656                                                                                     |
| IPI00179953                                                                                                 |
| IPI00555628                                                                                                 |
| IPI00435020,IPI00795918                                                                                     |
| IPI00019380                                                                                                 |
| IPI00604620                                                                                                 |
| IPI00827674                                                                                                 |
| IPI00288941                                                                                                 |
| IPI00022078,IPI00183085,IPI00783586                                                                         |
| IPI00291328,IPI00412122,IPI00646556                                                                         |
| IPI00020008                                                                                                 |
| IPI00023754                                                                                                 |
| IPI00795624                                                                                                 |
| IPI00002525                                                                                                 |
| IPI00023814,IPI00217291,IPI00472011                                                                         |
| IPI00217291                                                                                                 |
| IPI00029817                                                                                                 |
| IPI00384998,IPI00470575,IPI00513695,IPI00513705,IPI00655702,IPI00655890,IPI00656129                         |
| IPI00026167                                                                                                 |
| IPI00026944                                                                                                 |
| IPI00028908                                                                                                 |
| IPI00304435                                                                                                 |
| IPI00004845                                                                                                 |
| IPI00023779,IPI00456663,IPI00456664,IPI00456665,IPI00646277                                                 |
| IPI00549467                                                                                                 |
| IPI00031753,IPI00220630                                                                                     |
| IPI00604590,IPI00795292                                                                                     |
| IPI00795292                                                                                                 |
| IPI00337541                                                                                                 |
| IPI00654555                                                                                                 |
| IPI00411937                                                                                                 |
| IPI00329352                                                                                                 |
| IPI00304596                                                                                                 |

|                                                                                                             |
|-------------------------------------------------------------------------------------------------------------|
| IPI00006379                                                                                                 |
| IPI00297655                                                                                                 |
| IPI00029819                                                                                                 |
| IPI00465159                                                                                                 |
| IPI00011140                                                                                                 |
| IPI00017672                                                                                                 |
| IPI00301579                                                                                                 |
| IPI00026216                                                                                                 |
| IPI00549248                                                                                                 |
| IPI00220740,IPI00549248                                                                                     |
| IPI00220562                                                                                                 |
| IPI00787050                                                                                                 |
| IPI00026946                                                                                                 |
| IPI00619898                                                                                                 |
| IPI00012069,IPI00619898,IPI00619966                                                                         |
| IPI00219129,IPI00515016                                                                                     |
| IPI00333776,IPI00655818                                                                                     |
| IPI00333778                                                                                                 |
| IPI00783655                                                                                                 |
| IPI00299594,IPI00398715                                                                                     |
| IPI00165438,IPI00299594,IPI00398715,IPI00549340,IPI00607733,IPI00639917,IPI00749187                         |
| IPI00300890,IPI00641131                                                                                     |
| IPI00006451                                                                                                 |
| IPI00100197,IPI00397571                                                                                     |
| IPI00022830,IPI00100197,IPI00376904,IPI00397571                                                             |
| IPI00376904                                                                                                 |
| IPI00807412                                                                                                 |
| IPI00385236                                                                                                 |
| IPI00295542,IPI00790899                                                                                     |
| IPI00009123,IPI00746961                                                                                     |
| IPI00022145                                                                                                 |
| IPI00550746,IPI00646767,IPI00647418                                                                         |
| IPI00646917                                                                                                 |
| IPI00296913,IPI00646762                                                                                     |
| IPI00031558                                                                                                 |
| IPI00006196,IPI00292771                                                                                     |
| IPI00009901                                                                                                 |
| IPI00328703                                                                                                 |
| IPI00016405                                                                                                 |
| IPI00017841,IPI00419820,IPI00472517,IPI00550145                                                             |
| IPI00184375                                                                                                 |
| IPI00385326                                                                                                 |
| IPI00024621,IPI00607652                                                                                     |
| IPI00006721,IPI00107749,IPI00107750,IPI00107751,IPI00107752,IPI00107753,IPI00375149,IPI00375150,IPI00375151 |
| IPI00329760,IPI00604451,IPI00784387                                                                         |
| IPI00186581                                                                                                 |
| IPI00398855                                                                                                 |
| IPI00000581,IPI00409750                                                                                     |
| IPI00409750                                                                                                 |
| IPI00009923                                                                                                 |
| IPI00010796                                                                                                 |
| IPI00748022,IPI00786945                                                                                     |
| IPI00299000,IPI00794875                                                                                     |

|                                                             |
|-------------------------------------------------------------|
| IPI00796945                                                 |
| IPI00008524,IPI00410017,IPI00478522,IPI00796945             |
| IPI00555747                                                 |
| IPI00005792,IPI00414963                                     |
| IPI00218728                                                 |
| IPI00026546                                                 |
| IPI00014808                                                 |
| IPI00402613,IPI00640518,IPI00647526                         |
| IPI00217223                                                 |
| IPI00656138                                                 |
| IPI00419979                                                 |
| IPI00787208                                                 |
| IPI00177543,IPI00219041,IPI00219042,IPI00219043,IPI00749176 |
| IPI00219042                                                 |
| IPI00001869,IPI00513756                                     |
| IPI00011619                                                 |
| IPI00298547                                                 |
| IPI00449049                                                 |
| IPI00018873,IPI00472879                                     |
| IPI00218568                                                 |
| IPI00016610                                                 |
| IPI00012066,IPI00216689,IPI00796337                         |
| IPI00176458,IPI00215992                                     |
| IPI00645206                                                 |
| IPI00552819                                                 |
| IPI00215946                                                 |
| IPI00009034                                                 |
| IPI00001428                                                 |
| IPI00000495                                                 |
| IPI00294380,IPI00797038                                     |
| IPI00411680,IPI00828189                                     |
| IPI00024989                                                 |
| IPI00021700                                                 |
| IPI00299738                                                 |
| IPI00002543                                                 |
| IPI00301961                                                 |
| IPI00002280                                                 |
| IPI00029131,IPI00643663                                     |
| IPI00165229,IPI00294862                                     |
| IPI00238849                                                 |
| IPI00387168                                                 |
| IPI00013297                                                 |
| IPI00023640                                                 |
| IPI00025277                                                 |
| IPI00246058                                                 |
| IPI00099977                                                 |
| IPI00011865,IPI00018822                                     |
| IPI00006236                                                 |
| IPI00025252,IPI00657680                                     |
| IPI00009904                                                 |
| IPI00299571                                                 |
| IPI00007935                                                 |
| IPI00014850,IPI00643342                                     |

|                                                             |
|-------------------------------------------------------------|
| IPI00219446                                                 |
| IPI00000828                                                 |
| IPI00257882                                                 |
| IPI00004534                                                 |
| IPI00006052                                                 |
| IPI00015891                                                 |
| IPI00643196                                                 |
| IPI00216691                                                 |
| IPI00107555,IPI00219468                                     |
| IPI00219525                                                 |
| IPI00169383                                                 |
| IPI00029997                                                 |
| IPI00550364                                                 |
| IPI00220739                                                 |
| IPI00011200                                                 |
| IPI00299977                                                 |
| IPI00013723                                                 |
| IPI00012575                                                 |
| IPI00059366,IPI00304171,IPI00744148                         |
| IPI00220644                                                 |
| IPI00479186                                                 |
| IPI00024578                                                 |
| IPI00011588                                                 |
| IPI00019590                                                 |
| IPI00296180                                                 |
| IPI00010676,IPI00215706                                     |
| IPI00014898,IPI00186711,IPI00398002                         |
| IPI00398002                                                 |
| IPI00398778                                                 |
| IPI00019580                                                 |
| IPI00027192                                                 |
| IPI00337495,IPI00472165                                     |
| IPI00030255                                                 |
| IPI00002624                                                 |
| IPI00216694                                                 |
| IPI00643034                                                 |
| IPI00044369,IPI00073777,IPI00640599                         |
| IPI00398435,IPI00736693                                     |
| IPI00418458                                                 |
| IPI00018272                                                 |
| IPI00058192                                                 |
| IPI00007960,IPI00218585,IPI00410241,IPI00641231,IPI00797227 |
| IPI00015018                                                 |
| IPI00301109,IPI00413014,IPI00470503,IPI00654717             |
| IPI00419585                                                 |
| IPI00646304                                                 |
| IPI00220188                                                 |
| IPI00026519                                                 |
| IPI00300952                                                 |
| IPI00020950,IPI00216196                                     |
| IPI00103630                                                 |
| IPI00006167                                                 |
| IPI00550451,IPI00794133,IPI00797955                         |

|                                                                         |
|-------------------------------------------------------------------------|
| IPI00218236                                                             |
| IPI00398922                                                             |
| IPI00008380,IPI00815784                                                 |
| IPI00419307,IPI00554737                                                 |
| IPI00019812,IPI00790133                                                 |
| IPI00514424                                                             |
| IPI00002412                                                             |
| IPI00021421,IPI00453232,IPI00552460,IPI00647927,IPI00783249,IPI00789091 |
| IPI00399307                                                             |
| IPI00000874                                                             |
| IPI00027350                                                             |
| IPI00024919                                                             |
| IPI00011937                                                             |
| IPI00024915,IPI00759663                                                 |
| IPI00375306                                                             |
| IPI00220301                                                             |
| IPI00026154,IPI00792916                                                 |
| IPI00296337,IPI00376215                                                 |
| IPI00064328,IPI00441473                                                 |
| IPI00009276                                                             |
| IPI00012540                                                             |
| IPI00294004                                                             |
| IPI00016346                                                             |
| IPI00004968                                                             |
| IPI00305068                                                             |
| IPI00552495                                                             |
| IPI00219617,IPI00718888                                                 |
| IPI00217053,IPI00744319                                                 |
| IPI00011694                                                             |
| IPI00011695,IPI00815665                                                 |
| IPI00026941                                                             |
| IPI00012503,IPI00219825,IPI00744835                                     |
| IPI00744835                                                             |
| IPI00001734,IPI00219478                                                 |
| IPI00028122                                                             |
| IPI00016832,IPI00472442                                                 |
| IPI00219622                                                             |
| IPI00171199,IPI00419249                                                 |
| IPI00795606                                                             |
| IPI00299155,IPI00789638,IPI00790038,IPI00795606                         |
| IPI00789638,IPI00790038                                                 |
| IPI00291922                                                             |
| IPI00029623                                                             |
| IPI00024175                                                             |
| IPI00218372                                                             |
| IPI00025019                                                             |
| IPI00028006                                                             |
| IPI00028004                                                             |
| IPI00555956                                                             |
| IPI00375704,IPI00479306                                                 |
| IPI00003217                                                             |
| IPI00000783                                                             |
| IPI00020042,IPI00216770                                                 |
| IPI00023919,IPI00745502                                                 |

|                                     |
|-------------------------------------|
| IPI00021926                         |
| IPI00299608,IPI00456695             |
| IPI00105598                         |
| IPI00185374,IPI00335069             |
| IPI00375380                         |
| IPI00012268                         |
| IPI00384420                         |
| IPI00011603                         |
| IPI00022694                         |
| IPI00019927                         |
| IPI00479722                         |
| IPI00030154,IPI00479722             |
| IPI00384051,IPI00746205             |
| IPI00103525                         |
| IPI00179964,IPI00183626,IPI00334175 |
| IPI00790462                         |
| IPI00789101                         |
| IPI00015029,IPI00789101,IPI00789698 |
| IPI00022048                         |
| IPI00555762                         |
| IPI00298292                         |
| IPI00008998                         |
| IPI00298347,IPI00658023             |
| IPI00289082                         |
| IPI00375547                         |
| IPI00465186                         |
| IPI00107831,IPI00642154             |
| IPI00011651                         |
| IPI00015756                         |
| IPI00743517                         |
| IPI00748312                         |
| IPI00176903,IPI00513773             |
| IPI00029568                         |
| IPI00219425                         |
| IPI00219426                         |
| IPI00003648                         |
| IPI00215980                         |
| IPI00016112,IPI00787655             |
| IPI00787655                         |
| IPI00004358                         |
| IPI00470525,IPI00783313             |
| IPI00026665                         |
| IPI00003919                         |
| IPI00003590                         |
| IPI00465016                         |
| IPI00376394,IPI00479085,IPI00783371 |
| IPI00020436                         |
| IPI00291928                         |
| IPI00798089                         |
| IPI00016342                         |
| IPI00008219                         |
| IPI00008223                         |
| IPI00749517                         |

|                                                 |
|-------------------------------------------------|
| IPI00011268,IPI00216044                         |
| IPI00793015                                     |
| IPI00792352,IPI00793015                         |
| IPI00796462                                     |
| IPI00643041,IPI00795671,IPI00796462             |
| IPI00414127                                     |
| IPI00221325                                     |
| IPI00026337,IPI00179121,IPI00456728,IPI00456729 |
| IPI00329200,IPI00783829,IPI00793443             |
| IPI00783829,IPI00793443                         |
| IPI00294879,IPI00411570                         |
| IPI00019345,IPI00640287                         |
| IPI00015148                                     |
| IPI00004860,IPI00759723                         |
| IPI00328319,IPI00645329                         |
| IPI00395865                                     |
| IPI00646512                                     |
| IPI00217626                                     |
| IPI00102752,IPI00220716,IPI00220717             |
| IPI00019046,IPI00783867                         |
| IPI00004273                                     |
| IPI00024320,IPI00604407                         |
| IPI00001757,IPI00216659                         |
| IPI00304692                                     |
| IPI00061178                                     |
| IPI00219718                                     |
| IPI00001661,IPI00747309,IPI00787306             |
| IPI00465044                                     |
| IPI00015842                                     |
| IPI00178431                                     |
| IPI00216890                                     |
| IPI00375358,IPI00375359                         |
| IPI00788176                                     |
| IPI00027500                                     |
| IPI00027434,IPI00647268                         |
| IPI00029699                                     |
| IPI00008554                                     |
| IPI00414896                                     |
| IPI00162563                                     |
| IPI00550069                                     |
| IPI00783491                                     |
| IPI00647400                                     |
| IPI00642211                                     |
| IPI00829739                                     |
| IPI00307155                                     |
| IPI00167090                                     |
| IPI00020127                                     |
| IPI00646500                                     |
| IPI00017373                                     |
| IPI00412579,IPI00827508                         |
| IPI00376798,IPI00647168,IPI00647674,IPI00746438 |
| IPI00024933                                     |

|                                                 |
|-------------------------------------------------|
| IPI00555744                                     |
| IPI00413324,IPI00478208,IPI00514874,IPI00644171 |
| IPI00215719                                     |
| IPI00219153                                     |
| IPI00021266,IPI00789159,IPI00793523,IPI00794894 |
| IPI00219155,IPI00382885                         |
| IPI00219156                                     |
| IPI00215790,IPI00792410                         |
| IPI00003918                                     |
| IPI00000494,IPI00797983                         |
| IPI00012772,IPI00795138,IPI00797230             |
| IPI00794884                                     |
| IPI00008530,IPI00556485,IPI00791448             |
| IPI00008527                                     |
| IPI00008529                                     |
| IPI00008438                                     |
| IPI00025091                                     |
| IPI00013917                                     |
| IPI00221089                                     |
| IPI00026271                                     |
| IPI00215780                                     |
| IPI00013485,IPI00479366,IPI00744451,IPI00827598 |
| IPI00012493,IPI00794659                         |
| IPI00017448,IPI00387084,IPI00797280             |
| IPI00793330                                     |
| IPI00179330,IPI00456429,IPI00793330             |
| IPI00011253                                     |
| IPI00419880,IPI00472119                         |
| IPI00217030                                     |
| IPI00008433                                     |
| IPI00013415                                     |
| IPI00216587                                     |
| IPI00413108,IPI00553164                         |
| IPI00220967                                     |
| IPI00215743                                     |
| IPI00013871                                     |
| IPI00027765,IPI00829898                         |
| IPI00021766                                     |
| IPI00021187                                     |
| IPI00009104                                     |
| IPI00183695                                     |
| IPI00013895                                     |
| IPI00023234                                     |
| IPI00646058                                     |
| IPI00005648                                     |
| IPI00514587                                     |
| IPI00021417                                     |
| IPI00006025                                     |
| IPI00306382,IPI00453116,IPI00479205             |
| IPI00177968,IPI00291007,IPI00447020             |
| IPI00009362                                     |
| IPI00292071                                     |
| IPI00008944                                     |



|                                                 |
|-------------------------------------------------|
| IPI00012426                                     |
| IPI00217435,IPI00747808                         |
| IPI00793201                                     |
| IPI00006252,IPI00793201                         |
| IPI00002441                                     |
| IPI00011564                                     |
| IPI00299086,IPI00479018                         |
| IPI00293167                                     |
| IPI00106642                                     |
| IPI00106646                                     |
| IPI00005809                                     |
| IPI00062419                                     |
| IPI00017376                                     |
| IPI00170635                                     |
| IPI00745729                                     |
| IPI00031510                                     |
| IPI00019209                                     |
| IPI00028213,IPI00783087                         |
| IPI00004494                                     |
| IPI00024570                                     |
| IPI00419724                                     |
| IPI00073763                                     |
| IPI00023807                                     |
| IPI00025257                                     |
| IPI00030877                                     |
| IPI00029056                                     |
| IPI00014177,IPI00792151                         |
| IPI00033025                                     |
| IPI00784614,IPI00784936                         |
| IPI00455033,IPI00784614,IPI00784808,IPI00784936 |
| IPI00784808                                     |
| IPI00410693,IPI00412714,IPI00470497,IPI00470498 |
| IPI00412714,IPI00470498                         |
| IPI00553177                                     |
| IPI00027444                                     |
| IPI00007117                                     |
| IPI00783625                                     |
| IPI00032139                                     |
| IPI00009890                                     |
| IPI00006114                                     |
| IPI00291866,IPI00556459                         |
| IPI00032140                                     |
| IPI00016150                                     |
| IPI00072377                                     |
| IPI00301311                                     |
| IPI00419722                                     |
| IPI00018276,IPI00419722,IPI00645828             |
| IPI00386119                                     |
| IPI00017451,IPI00470590                         |
| IPI00017341                                     |
| IPI00029764                                     |
| IPI00026089                                     |

|                                                                         |
|-------------------------------------------------------------------------|
| IPI00221106                                                             |
| IPI00300371                                                             |
| IPI00017339                                                             |
| IPI00010404                                                             |
| IPI00013890                                                             |
| IPI00010740                                                             |
| IPI00749245                                                             |
| IPI00215884,IPI00218591,IPI00218592                                     |
| IPI00218591                                                             |
| IPI00301503,IPI00472633,IPI00555647                                     |
| IPI00005978,IPI00385786,IPI00796848                                     |
| IPI00010204                                                             |
| IPI00003377                                                             |
| IPI00012340,IPI00793205                                                 |
| IPI00414984,IPI00418183                                                 |
| IPI00013949                                                             |
| IPI00010402                                                             |
| IPI00021326                                                             |
| IPI00017480                                                             |
| IPI00002520,IPI00748411,IPI00789370                                     |
| IPI00010949                                                             |
| IPI00069750,IPI00100716,IPI00788826,IPI00797595                         |
| IPI00788826                                                             |
| IPI00296197                                                             |
| IPI00647217                                                             |
| IPI00301364                                                             |
| IPI00019472                                                             |
| IPI00007084                                                             |
| IPI00220194                                                             |
| IPI00008085                                                             |
| IPI00027493,IPI00554481,IPI00554611,IPI00554702,IPI00554722,IPI00604710 |
| IPI00554702,IPI00604710                                                 |
| IPI00221393                                                             |
| IPI00017640                                                             |
| IPI00176398                                                             |
| IPI00008580                                                             |
| IPI00297211                                                             |
| IPI00797830                                                             |
| IPI00234252,IPI00797830                                                 |
| IPI00150057,IPI00216047                                                 |
| IPI00794957                                                             |
| IPI00291939                                                             |
| IPI00219420                                                             |
| IPI00301812,IPI00412898                                                 |
| IPI00412898                                                             |
| IPI00395336                                                             |
| IPI00301528,IPI00395336                                                 |
| IPI00005102                                                             |
| IPI00140420                                                             |
| IPI00219483,IPI00290204                                                 |
| IPI00012382                                                             |
| IPI00027285,IPI00329512,IPI00384173,IPI00395674,IPI00785142,IPI00792592 |
| IPI00029267                                                             |

|                                                 |
|-------------------------------------------------|
| IPI00013396,IPI00641788                         |
| IPI00302850                                     |
| IPI00017963                                     |
| IPI00017964                                     |
| IPI00029266,IPI00068430                         |
| IPI00016572                                     |
| IPI00013830                                     |
| IPI00218733,IPI00783680                         |
| IPI00022314                                     |
| IPI00217930,IPI00218618,IPI00218619,IPI00401958 |
| IPI00216057                                     |
| IPI00022608                                     |
| IPI00217882                                     |
| IPI00376403                                     |
| IPI00011643,IPI00376403                         |
| IPI00005292                                     |
| IPI00006128                                     |
| IPI00021000,IPI00385896                         |
| IPI00306339                                     |
| IPI00478292,IPI00744706,IPI00745092             |
| IPI00745092                                     |
| IPI00744706                                     |
| IPI00005614                                     |
| IPI00783357,IPI00784104                         |
| IPI00143753,IPI00829908                         |
| IPI00019372                                     |
| IPI00789296                                     |
| IPI00293434                                     |
| IPI00009822                                     |
| IPI00642816                                     |
| IPI00289795                                     |
| IPI00004446                                     |
| IPI00782992                                     |
| IPI00168554                                     |
| IPI00009032                                     |
| IPI00005154                                     |
| IPI00032826                                     |
| IPI00001922                                     |
| IPI00009629                                     |
| IPI00013887                                     |
| IPI00020201                                     |
| IPI00000001,IPI00218609,IPI00641873,IPI00643664 |
| IPI00005564                                     |
| IPI00008780                                     |
| IPI00299299                                     |
| IPI00013894                                     |
| IPI00479997,IPI00642012,IPI00643115,IPI00744618 |
| IPI00744618                                     |
| IPI00294536                                     |
| IPI00019971                                     |
| IPI00221222                                     |
| IPI00171412,IPI00334514,IPI00783919,IPI00784010 |
| IPI00334514                                     |

|                                                 |
|-------------------------------------------------|
| IPI00026970                                     |
| IPI00456681,IPI00784161                         |
| IPI00301288                                     |
| IPI00307200                                     |
| IPI00018140,IPI00402182,IPI00402183,IPI00402184 |
| IPI00239405,IPI00239406                         |
| IPI00410127                                     |
| IPI00296215                                     |
| IPI00020194,IPI00294426                         |
| IPI00647915                                     |
| IPI00550363,IPI00647915                         |
| IPI00550488,IPI00744692                         |
| IPI00744692                                     |
| IPI00025815                                     |
| IPI00329633                                     |
| IPI00217236                                     |
| IPI00293126                                     |
| IPI00300341,IPI00645048,IPI00791185,IPI00796346 |
| IPI00026670                                     |
| IPI00247871                                     |
| IPI00219465                                     |
| IPI00290566                                     |
| IPI00294619,IPI00788849                         |
| IPI00021834                                     |
| IPI00009198                                     |
| IPI00022462                                     |
| IPI00000075                                     |
| IPI00235354                                     |
| IPI00018219                                     |
| IPI00304865                                     |
| IPI00294578                                     |
| IPI00296099                                     |
| IPI00329535                                     |
| IPI00328840                                     |
| IPI00549189                                     |
| IPI00104050                                     |
| IPI00794391                                     |
| IPI00005615,IPI00183949,IPI00642600,IPI00644708 |
| IPI00028376                                     |
| IPI00032292,IPI00642739                         |
| IPI00788747                                     |
| IPI00027166,IPI00787781,IPI00788747             |
| IPI00005563                                     |
| IPI00643920,IPI00788802                         |
| IPI00788802                                     |
| IPI00298994,IPI00784273                         |
| IPI00784273                                     |
| IPI00301865,IPI00383814                         |
| IPI00013174                                     |
| IPI00443909                                     |
| IPI00005087                                     |
| IPI00030131                                     |

|                                                                         |
|-------------------------------------------------------------------------|
| IPI00216230                                                             |
| IPI00031008                                                             |
| IPI00298362                                                             |
| IPI00064377                                                             |
| IPI00018880,IPI00796532                                                 |
| IPI00024364                                                             |
| IPI00419856                                                             |
| IPI00015602                                                             |
| IPI00413611                                                             |
| IPI00178667,IPI00218753,IPI00218754,IPI00414101,IPI00478232             |
| IPI00023137,IPI00477672                                                 |
| IPI00301631                                                             |
| IPI00029778,IPI00657708,IPI00742743                                     |
| IPI00218323,IPI00619951,IPI00619958,IPI00782968                         |
| IPI00383670,IPI00472076,IPI00793361                                     |
| IPI00743469                                                             |
| IPI00306825,IPI00399265,IPI00399267,IPI00743469                         |
| IPI00465028,IPI00797687                                                 |
| IPI00014581,IPI00018853,IPI00216135,IPI00296039,IPI00604537,IPI00742825 |
| IPI00220709                                                             |
| IPI00178083,IPI00218319,IPI00479185                                     |
| IPI00479185                                                             |
| IPI00010779                                                             |
| IPI00298237,IPI00554538                                                 |
| IPI00640197                                                             |
| IPI00022970,IPI00742682                                                 |
| IPI00009943                                                             |
| IPI00102661                                                             |
| IPI00030275                                                             |
| IPI00438229,IPI00438230                                                 |
| IPI00301028                                                             |
| IPI00003515                                                             |
| IPI00019450,IPI00642416,IPI00646322,IPI00646813                         |
| IPI00641368                                                             |
| IPI00018768                                                             |
| IPI00030914                                                             |
| IPI00029048                                                             |
| IPI00180675                                                             |
| IPI00792677                                                             |
| IPI00387144,IPI00792677                                                 |
| IPI00218343                                                             |
| IPI00011654                                                             |
| IPI00013475                                                             |
| IPI00031370                                                             |
| IPI00007752                                                             |
| IPI00013683                                                             |
| IPI00023598                                                             |
| IPI00641706                                                             |
| IPI00646779                                                             |
| IPI00183508,IPI00385754                                                 |
| IPI00550917                                                             |
| IPI00410487,IPI00830092                                                 |

|                                                                                                             |
|-------------------------------------------------------------------------------------------------------------|
| IPI00216298                                                                                                 |
| IPI00026328                                                                                                 |
| IPI00401264                                                                                                 |
| IPI00395646                                                                                                 |
| IPI00305692,IPI00642032                                                                                     |
| IPI00008552                                                                                                 |
| IPI00646689                                                                                                 |
| IPI00743646,IPI00830010                                                                                     |
| IPI00005613,IPI00619914,IPI00619942                                                                         |
| IPI00746657                                                                                                 |
| IPI00031556,IPI00746657,IPI00830039                                                                         |
| IPI00456429,IPI00719280,IPI00743241,IPI00743650,IPI00744274,IPI00783060,IPI00784990,IPI00789107,IPI00789108 |
| IPI00181306,IPI00514856,IPI00646016                                                                         |
| IPI00646016                                                                                                 |
| IPI00645078                                                                                                 |
| IPI00328154,IPI00375533                                                                                     |
| IPI00032957,IPI00450472                                                                                     |
| IPI00021347                                                                                                 |
| IPI00003949                                                                                                 |
| IPI00019599,IPI00019600,IPI00030962,IPI00397947,IPI00447356,IPI00472498                                     |
| IPI00797889                                                                                                 |
| IPI00071180                                                                                                 |
| IPI00024502                                                                                                 |
| IPI00018352                                                                                                 |
| IPI00219512,IPI00219513,IPI00299313,IPI00549820,IPI00549849,IPI00642374                                     |
| IPI00294495                                                                                                 |
| IPI00654779                                                                                                 |
| IPI00024466,IPI00619903                                                                                     |
| IPI00619903                                                                                                 |
| IPI00031420                                                                                                 |
| IPI00014919,IPI00329331,IPI00395676                                                                         |
| IPI00399139                                                                                                 |
| IPI00034049,IPI00399170                                                                                     |
| IPI00301489                                                                                                 |
| IPI00219913                                                                                                 |
| IPI00000728                                                                                                 |
| IPI00024664,IPI00375145                                                                                     |
| IPI00375145                                                                                                 |
| IPI00003965,IPI00646721,IPI00783739                                                                         |
| IPI00646721                                                                                                 |
| IPI00107113                                                                                                 |
| IPI00410544,IPI00657807                                                                                     |
| IPI00642826                                                                                                 |
| IPI00170692                                                                                                 |
| IPI00000873,IPI00829641                                                                                     |
| IPI00395488,IPI00745461                                                                                     |
| IPI00156689                                                                                                 |
| IPI00334159                                                                                                 |
| IPI00009802,IPI00215628,IPI00215629,IPI00215631                                                             |
| IPI00291175,IPI00307162                                                                                     |
| IPI00307162                                                                                                 |
| IPI00022774                                                                                                 |
| IPI00028076                                                                                                 |

|                                                 |
|-------------------------------------------------|
| IPI00069058                                     |
| IPI00218852                                     |
| IPI00746388                                     |
| IPI00418471                                     |
| IPI00020719                                     |
| IPI00180759,IPI00784236,IPI00785025             |
| IPI00170796,IPI00184284,IPI00798102             |
| IPI00018931                                     |
| IPI00216313                                     |
| IPI00396383                                     |
| IPI00394834                                     |
| IPI00412737                                     |
| IPI00295400,IPI00412737                         |
| IPI00746165                                     |
| IPI00216256,IPI00746165                         |
| IPI00019269,IPI00789452                         |
| IPI00012202                                     |
| IPI00291488                                     |
| IPI00001863                                     |
| IPI00022052                                     |
| IPI00013178,IPI00795811                         |
| IPI00298961,IPI00784388                         |
| IPI00220834                                     |
| IPI00465430                                     |
| IPI00012197                                     |
| IPI00183487                                     |
| IPI00432723                                     |
| IPI00216919                                     |
| IPI00007074                                     |
| IPI00031812,IPI00385699,IPI00450235             |
| IPI00450235                                     |
| IPI00031812                                     |
| IPI00013981,IPI00477734                         |
| IPI00008569                                     |
| IPI00216318,IPI00759832                         |
| IPI00000816                                     |
| IPI00220642                                     |
| IPI00216319                                     |
| IPI00018146                                     |
| IPI00021263                                     |
| IPI00333858,IPI00748303                         |
| IPI00013457,IPI00219759,IPI00788670,IPI00792837 |
| IPI00219760                                     |

| SwissProt |
|-----------|
|           |
|           |
|           |
|           |
|           |
|           |
|           |
|           |
|           |
|           |
|           |
|           |
|           |
|           |
|           |
| Q15942,   |
|           |
| Q59F68    |
|           |
|           |
| Q9UP43    |
|           |
| Q5SYT8    |
| P07029,   |
|           |
|           |
| P17538    |
| P49588    |
| P49588,   |
| P61221,   |
| Q8NE71    |
| Q96IU4,   |
| P19801    |
| P35610    |
| Q9BWD1,   |
| Q9H3P7,   |
| P12821,   |
| Q9UKV3,   |
|           |
| P53396,   |
| O00154,   |
| P24666,   |
| P13686,   |
| P68133,   |
| P60709,   |
| P63261,   |
| P12814    |
| P12814,   |
| O43707,   |
| P61160,   |
| P61160,   |
| P61158,   |



|         |
|---------|
| P00813, |
| O14672, |
| Q13444  |
| Q13444  |
| P78536, |
| P78536, |
| Q9H013, |
| O75077, |
| Q13443, |
| Q9UHI8, |
| P58397, |
| Q8TE59, |
| Q8N6G6  |
| Q86TH1  |
| P55265  |
| P55265, |
| P18509, |
| P11766, |
| Q9BV57, |
| P55263, |
| Q16186, |
| P30520, |
| O95994, |
| O00468, |
| P01019, |
| P23526, |
| Q09666  |
| O95433, |
| O95831, |
| O00170, |
| P54819, |
| Q02952, |
| Q02952, |
| P14550, |
| P15121, |
| O60218, |
| Q04828, |
| P52895, |
| P42330, |
| O43488, |
| O95154, |
| P02768, |
| Q13740, |
| P00352, |
| P30838, |
| P51648  |
| P49189, |
| P04075, |
| P09972, |
| P02760, |
| Q9BY76, |
| Q9NQW6, |
| P39687, |

|                |
|----------------|
| Q92688,        |
| Q9BTT0,        |
| Q9H6X2,        |
| P04083,        |
| P50995,        |
| P07355,        |
| P08758,        |
| O14617         |
| P13798,        |
| P27695,        |
| Q9BZZ5,        |
| P51693,        |
| Q06481,        |
| Q8NCW5         |
| Q8NCW5         |
| P02649,        |
| P05067,        |
| P07741,        |
| P48444,        |
| P61204,P84077, |
| P61204,        |
| P53367,        |
| P52565         |
| P52565         |
| P52565,        |
| P36405,        |
| P55145,        |
| O15143,        |
|                |
| P15289,        |
| Q9NZ08,        |
| Q13510         |
| O75643,        |
| Q12797,        |
| Q12797,        |
| Q8NI34         |
| P00966,        |
| P31939,        |
| O00244,        |
| P05023,        |
| P13637,P50993, |
| P54709,        |
| P16615         |
| P25705,        |
| P06576,        |
| P18859,        |
| Q15904,        |
| O75787,        |
| O75787,        |
| P38606,        |
| P21281,        |
| Q13838,        |
| O75882,        |

|         |
|---------|
| P30530, |
| P25311, |
| P61769, |
| Q96L58, |
| O94766  |
| O94766, |
| O43505, |
| Q9NY97, |
| P15291, |
| P15291, |
| O60512  |
| O60513, |
| O95816, |
| O95817, |
| O75531, |
| P80723, |
| P48634  |
| Q9P287, |
| Q9P287, |
| P06276, |
| Q9NYF8, |
| P23560, |
| P21810, |
| P55957, |
| Q13867, |
| P53004, |
| P13497, |
| P13497, |
| Q9H3K6, |
| O95861, |
| P35613  |
| P35613, |
| Q10588, |
| P43251, |
| P20290, |
| O43684, |
| O00193  |
| Q9BT56, |
| Q9NQ88, |
| Q96JM3, |
| Q14767, |
| Q9GZT3, |
| Q9Y224, |
| Q9Y224, |
| Q09666  |
| Q969H8, |
| Q07021, |
| Q9UHK6, |
| P00736, |
|         |
| P09871, |
| Q9NQG5, |

|         |
|---------|
| P30042  |
| Q9Y310, |
| Q6NW34, |
| Q6UWH4  |
| Q8TB73  |
| Q14CJ0  |
| O43598, |
| Q6UXA7, |
| O75223, |
| P00918, |
| P23280, |
| Q9HB71, |
| P27708, |
| Q9BY67  |
| P01258, |
| Q05682, |
| P62158, |
| P27797, |
| O43852, |
| O43852, |
| Q13557, |
| Q86VP6, |
| Q8WVQ1, |
| P27824, |
| Q01518, |
| P07384, |
| P52907, |
| P47755, |
| P47756, |
| P47756  |
| Q9Y2V2, |
| P49589, |
| P20810  |
| P20810  |
| Q13951, |
| P16152, |
| P83916, |
| Q13185, |
| P45973, |
| Q8IX12, |
| Q86WR0  |
| Q6QD51  |
| P13500, |
| P78371, |
| P49368, |
| P50991, |
| P48643, |
| P40227, |
| Q99832, |
| P50990, |
| Q6YHK3, |
| P08571, |
| Q5ZPR3, |

|                |
|----------------|
| O15446,O15446, |
| P16070,        |
| P16070,        |
| P16070,        |
| P15529,        |
| P08174,        |
| P32970,        |
| P60033,        |
| P21926,        |
| Q16543,        |
| P60953,        |
| Q99459,        |
| P12830,        |
| Q9Y6N8,        |
| P55287,        |
| P55290,        |
| Q12864,        |
| P19022,        |
| P22223,        |
| P22223         |
| Q9UKY7         |
| P06731,        |
| P19835,        |
| P23141,        |
| P00746         |
| Q9UEE9,        |
| P08603,        |
| Q5TFM7         |
| P23528,        |
| Q99674,        |
| Q8WU30         |
| P10645         |
| P05060,        |
| Q8TDX6,        |
| Q9BWS9         |
| O00533,        |
| O00533,        |
| Q6IN49         |
| Q8IZ52,        |
| Q9BU40,        |
| Q9NPF2,        |
| Q6FI81,        |
| Q8IUL8,        |
| Q14011,        |
| P12277,        |
| P12532,        |
| Q9Y240,        |
| O00299,        |
| Q9Y696,        |
| Q14677,        |
| P30622,        |
| O94985         |
| O94985,        |

|         |
|---------|
| Q9H4D0, |
| Q9BQT9, |
| Q9BQT9, |
| Q00610, |
| Q00610, |
| P10909, |
| P30085, |
| P62633, |
| P62633, |
| Q96KP4, |
| Q99439, |
| Q15417, |
| Q12860, |
| O43405, |
| Q99715, |
| Q99715, |
| P39060  |
| P02462  |
| P08572, |
| Q14031, |
| P20908  |
| P05997  |
| P12109, |
| P12110, |
| P27658, |
| P53621, |
| P53618, |
| P35606, |
| A6NE29  |
| Q9Y678, |
| Q9BR76, |
| Q9ULV4, |
| Q14019, |
| P20674, |
| P14854, |
| O75976, |
| P16870, |
| Q99829  |
| Q9NTZ6, |
| O75131, |
| P31327, |
| Q10570, |
| Q9P210, |
| Q16630, |
| Q16630, |
| Q9H3G5, |
| Q9H910, |
| O75629, |
| P06850, |
| Q9NZV1, |
| P52943, |
| Q9H336, |

|         |
|---------|
| P46108, |
| P46108, |
| P46109, |
| O75462, |
| O75718, |
| Q08257, |
| O75390, |
| P16989, |
| O75534, |
| P55060, |
| P09603, |
| P68400  |
| P21291, |
| P01037, |
| P01034, |
| P04080, |
| Q05048, |
| P33240, |
| O15320  |
| Q01459, |
| P29279, |
| Q96CG8, |
| P35221, |
| P35222, |
| P35222, |
| O60716, |
| P17812, |
| Q9NRF8, |
| P10619, |
| P10619  |
| P07858, |
| P53634, |
| P07339, |
| P07711, |
| O60911, |
| Q9UBR2, |
| Q14247, |
| Q13618, |
| O60888, |
| P09341, |
| O95715, |
| P42830, |
| O43169, |
| P99999, |
| Q7L576  |
| Q7L576  |
| O00622, |
| O00622, |
| Q8NCH0, |
| Q14118, |
| P14868, |
| Q96EP5  |
| P07108  |

|                |
|----------------|
| Q16643,        |
|                |
| P42126,        |
| Q13561,        |
| O94760,        |
| Q16531,        |
| Q16531,        |
| P20711,        |
| Q08345,        |
| P30046,        |
| Q92499,        |
| Q92841         |
| Q92841,        |
| Q9NUU7,Q9UMR2, |
| Q9NR30,        |
| O00148,        |
| O00571,        |
|                |
| Q86XP3         |
| Q7L014,        |
| P17844,        |
| Q16698,        |
| P35659,        |
| O43583,        |
| O00273,        |
| O43143,        |
| Q08211         |
| Q9BTC0,        |
| O60832,        |
|                |
| Q68D85         |
| O94907,        |
| P09622,        |
| Q12959,        |
| P31689,        |
| O60884,        |
| P25685,        |
| Q9UBS4,        |
| O75190,        |
| Q8IXB1         |
| Q13217,        |
| O75937,        |
| O00115,        |
| Q8NFT8,        |
| O00429,        |
| O00429,        |
| O00429,        |
| P50570,        |
| Q9ULA0,        |
| Q9BU89,        |
| Q9NY33,        |
| Q16555,        |



|         |
|---------|
| Q14195  |
| Q02487, |
| Q14126, |
| P15924, |
| P60981, |
| P60981, |
| P33316, |
| P33316, |
| P33316, |
| Q14204, |
| Q14204, |
| Q13409  |
| P63167, |
| Q99848, |
| Q13011, |
| P30084, |
| Q16610, |
| O43854  |
| P68104, |
| Q05639, |
| P24534, |
| P29692  |
|         |
| O43324, |
| P26641, |
| P13639, |
| Q12805, |
| Q96C19, |
| P20827, |
| P52803, |
| P98172, |
| Q15029, |
| Q6UY11, |
| Q9H223, |
| P41567, |
| P05198, |
| P20042, |
| P41091, |
| O75822, |
| Q9UBQ5, |
| Q13347, |
| O15372, |
| O75821, |
| O00303, |
| P60228, |
| Q9Y262  |
| Q99613, |
| P55884  |
| P60842, |
| Q14240, |
| P23588, |
| P06730, |
| P06730, |

|         |
|---------|
| Q04637, |
| Q04637, |
| P78344, |
| P55010, |
| P63241, |
| P63241, |
| O60841, |
| Q15717, |
| Q9HC35, |
| Q8N8S7, |
| P06733, |
| P09104, |
| Q9UHY7, |
| Q13822, |
| Q68D48  |
| O43768  |
| O75354  |
| Q9Y2J2, |
|         |
| P54764, |
| P54756, |
| P07099, |
| P07814, |
| Q9UBC2, |
| P84090, |
| Q96HE7, |
| P30040, |
| P10768, |
| Q9NQ30, |
| Q01844, |
| Q16394, |
| Q93063, |
| Q9UBQ6, |
| P00742, |
| Q8NFU3, |
| Q9Y624, |
| P12259  |
| Q8IZP2, |
| Q96TA1, |
| O75063, |
| P58499  |
| Q92520, |
| Q9NUQ9, |
| Q14320, |
| Q9Y285, |
| Q9NSD9, |
| P49327  |
| Q14517, |
| P22087, |
| P23142, |
| P23142, |
| P98095  |
| P98095, |

|                |
|----------------|
|                |
| P35555,        |
| P35556,        |
| P14324,        |
| P39748,        |
| Q9NZM1,        |
| O95750,        |
| Q14512,        |
| P11362,        |
| Q8N441,        |
| P07954,        |
| Q13642,        |
| Q14192,        |
| Q6UN15,        |
| Q6UN15,        |
| Q96AY3,        |
| P62942,        |
| Q00688,        |
| Q02790,        |
| P61326,Q96A72, |
|                |
|                |
|                |
|                |
| P21333         |
| P21333,        |
| O75369         |
| O75369         |
| Q14315         |
| Q06787,        |
| P02751         |
| Q68DP9         |
| P02751,        |
| Q5TON5         |
| Q86XX4,        |
| Q5SZK8,        |
| Q16658,        |
| P19883,        |
| Q12841,        |
| O95633,        |
| Q6MZW2,        |
| Q6MZW2,        |
| Q8N475,        |
| Q96AE4,        |
| Q96AE4         |
| P04066,        |
| Q9BTY2,        |
| P09958,        |
| P35637,        |
| O75494         |
| O75494,        |
| P51114         |

|         |
|---------|
| P51114, |
| Q13283, |
| Q9UN86, |
| P11413  |
| P11413, |
| P10253, |
| P10253, |
| O14976, |
| P22466, |
| P54803, |
| Q7LFX5, |
| P34059, |
| Q86SR1, |
| Q10471, |
| Q7Z7M9, |
| Q8NCL4, |
| Q86SF2, |
| Q8N428, |
| Q14697  |
| Q14697, |
| P04406, |
| P41250, |
| P22102, |
| Q14393, |
| Q8VXI9, |
| P04062, |
| Q04446, |
| P01275, |
| P48506, |
| P48507, |
| Q92616, |
| Q06430  |
| Q9Y2T3, |
| Q99988, |
| P31150, |
| P50395  |
| P50395, |
| Q06210, |
| Q92820, |
| O14908, |
| Q99417, |
| P06280, |
| P16278, |
| O94923, |
| Q92896, |
| Q04760, |
|         |
| P35754, |
| Q8NBJ5  |
| P17900, |
| P60983, |
| P49915, |
| P62873, |

|                              |
|------------------------------|
| P63244,                      |
| P46926,                      |
|                              |
| Q9UJJ9,                      |
| P15586,                      |
| Q8NBJ4,                      |
| Q8NBJ4,                      |
| O00461                       |
| Q9H8Y8,                      |
| Q9H8Y8,                      |
| P17174,                      |
| P00505,                      |
| P35052,                      |
| O75487,                      |
| Q9Y625,                      |
| P06744,                      |
| Q14444,                      |
| Q14444                       |
| Q86SQ4                       |
| Q86SQ4,                      |
| O15354,                      |
| Q9Y653,                      |
| P22352,                      |
| P62993,                      |
| Q9H772,                      |
| Q9UBQ7,                      |
|                              |
| P28799,                      |
| P07492                       |
| P07492,                      |
| P06396,                      |
| P15170,                      |
| P00390,                      |
| P48637,                      |
| P08263,                      |
| P78417,                      |
| P09211,                      |
| Q9NTK5,                      |
| Q92522,                      |
| P0C0S5,Q71UI9,               |
| Q9P0M6,                      |
| P84243,                      |
| Q16775,                      |
| P12081,                      |
| P69905,                      |
| P02042,P02100,P68871,P69891, |
| P18669, Q6FHU2               |
| P18669,                      |
|                              |
| Q92769,                      |
| P51858                       |
| Q9Y3E1,                      |
| Q00341,                      |

|                                                                        |
|------------------------------------------------------------------------|
| P06865,                                                                |
| P07686,                                                                |
| Q93099,                                                                |
| P49773,                                                                |
| Q9BX68,                                                                |
| O75146,                                                                |
| P61086,                                                                |
| P61086                                                                 |
| P16401,                                                                |
| P16403,                                                                |
| P16402,                                                                |
| P16104,Q96QV6,                                                         |
| P04908,                                                                |
| P0C0S8,P20671,Q16777,Q6F113,Q96KK5,Q99878,                             |
| P58876,Q5QNW6,Q93079,Q99877,                                           |
| O60814,P57053,P58876,Q5QNW6,Q93079,Q99877,Q99879,Q99880,P62807,        |
| P23527,                                                                |
| P68431,                                                                |
| P62805,                                                                |
| Q16777,Q6F113,                                                         |
| Q16777,                                                                |
| Q6DN03,Q6DRA6,                                                         |
| P06899,P23527,P33778,Q16778,Q8N257,                                    |
| Q71D13,                                                                |
| P19367,                                                                |
| P52789,                                                                |
| P01892,                                                                |
| P05534,                                                                |
| P01891,                                                                |
| P10316,                                                                |
| Q09160,                                                                |
| P13746,                                                                |
| P18464,P30464,P30484,P30487,P30488,P30490,P30491,P30495,P30498,P30685, |
| P30495,                                                                |
| P10319,P30491,P30685,                                                  |
| Q07000,                                                                |
| P30501,                                                                |
| P04222,                                                                |
| Q29963,                                                                |
| Q29960,                                                                |
| A2ABE7                                                                 |
|                                                                        |
|                                                                        |
| P01893                                                                 |
| P08397                                                                 |
| P09429,                                                                |
| P09429                                                                 |
| P26583,                                                                |
| O15347,                                                                |
| Q9UK76,                                                                |
| Q9UK76,                                                                |
| Q13151,                                                                |

|                       |
|-----------------------|
| P09651,               |
| P22626,               |
| P51991,               |
| Q99729                |
| Q99729,               |
| P07910,               |
| P07910,               |
| O14979                |
|                       |
| P52597,               |
| P31943,               |
| P31943,               |
| P55795,               |
| P31942,               |
| P61978                |
| P61978,               |
| P61978                |
| P14866,               |
| P52272,               |
| P52272,               |
| O43390,               |
| Q00839,               |
| Q00839,               |
| Q9BUJ2                |
| Q1KMD3                |
| Q5SSJ5                |
| P00492,               |
| P52594,               |
| Q96MM7,Q96MM7,Q96MM7, |
| P07900                |
| P08238                |
| P08238,               |
| P14625,               |
| P08107,               |
| P34932,               |
| O95757,               |
| P11021,               |
| P11142,               |
| P38646,               |
| P38646,               |
| P04792,               |
| P10809,               |
| P10809,               |
| P61604,               |
| P98160,               |
| Q92598,               |
| Q92598,               |
| Q92598,               |
| Q9BUP3,               |
|                       |
| Q92743,               |
| Q12794,               |
| Q9Y4L1,               |

|         |
|---------|
| P41252, |
| P05362, |
| Q9UMF0, |
| O75144  |
| P14735, |
| O75874, |
| P48735, |
| Q13907, |
| P05019, |
| P11717, |
| P18065, |
| P17936  |
| P17936, |
| P24593, |
| P24592, |
| Q16270, |
| Q8WX77  |
| Q969P0, |
| P78552, |
| Q9P0M4, |
| P27930, |
| P05231, |
| P40189, |
| Q12905, |
| Q12906, |
| Q12906, |
| Q9H0C8  |
| Q16891, |
| P29218, |
| P12268, |
| Q01101, |
| O95373, |
| P46940, |
| P05161, |
|         |
|         |
| P56537, |
| O95965  |
| Q9Y287, |
| Q9BY32  |
| P78504, |
| Q15046, |
| Q96CX2, |
| Q07666, |
| Q07666, |
| Q92945, |
| Q92945  |
| O15027, |
|         |
| A0MZ66  |
| Q6UWX4  |
| Q8N163, |



|         |
|---------|
| P33176, |
| P10721, |
| P21583, |
| Q07866, |
| Q9UBX7, |
| Q9P0G3  |
| P52292, |
| O00629, |
| Q14974, |
| Q96MU8, |
| P04264, |
| P08779, |
| P05783, |
| P05783, |
| P08727, |
| P12035, |
| P08729, |
| P05787, |
| P35527, |
| Q86UP2, |
| Q16719, |
| P32004, |
| P25391, |
| P24043, |
| O15230, |
| O15230, |
| P07942, |
| P55268, |
| P11047, |
| P13473, |
| P28838, |
| Q9P2J5, |
| P31025, |
| P13796, |
| P00338, |
| P07195, |
| P01130, |
| P01130, |
| Q9Y2U8, |
| Q32P28, |
| Q8NES3, |
| P09382, |
| P17931, |
| Q08380, |
| Q99538, |
| Q9UHB6, |
| P38571, |
| P38571, |
| Q9Y5X9, |
| P49257, |
| Q12907, |
| P02545, |
| P02545, |

|         |
|---------|
| P20700, |
| Q03252, |
|         |
| Q6UXI0  |
|         |
| P43487, |
|         |
| Q04323, |
| O15347, |
| P09661, |
|         |
| Q15056, |
|         |
| Q01469, |
|         |
| Q9C005, |
| Q9Y4K0, |
| Q9Y4K0, |
| O94910, |
| Q93052, |
| P50851, |
| Q86VZ4, |
| P98164, |
| Q14114, |
| Q8N1G4, |
| Q96AG4, |
| Q32MZ4, |
| Q32MZ4, |
| Q86UE6, |
| O95777, |
| Q86X29, |
| Q86X29, |
| P09960  |
| P09960, |
| Q14914, |
| Q9NS15  |
|         |
| Q9Y383, |
| Q9Y383, |
| P51884, |
| Q8NCC3, |
| O60664, |
| Q9UPN3, |
| Q96PK2, |
| P43363, |
| P43358, |
| Q9UNF1, |
| P33908  |
| O60476, |
| Q9UKM7, |
| Q16706, |
| P46821, |

|         |
|---------|
| P11137  |
| Q02750, |
| P27816, |
| P27816, |
| P27816, |
| P28482, |
| Q15691, |
| P29966, |
| P49006, |
| P56192, |
| P31153, |
| Q9NZL9  |
| O00339, |
| O15232, |
| P43243  |
| P43243, |
|         |
| P43121, |
| P25205, |
| P33991, |
| Q14566, |
| P33993, |
| Q14676, |
| P40925, |
| P40926, |
| P21741, |
| P48163, |
| Q14696, |
| P08581, |
| P50579  |
|         |
| P55001, |
| Q08431, |
| Q10469, |
| Q9UM21  |
| Q9UQ53  |
| Q09328, |
| Q8N9N8  |
| Q5JRA6  |
| Q29980  |
| P14174, |
| Q9UNW1, |
| P46013, |
| P55196, |
| P03956, |
| P09238, |
| P24347, |
| P08253, |
| Q9UBG0, |
| P19105, |
| P52815, |
| Q8WXX5, |

|         |
|---------|
| P26038, |
| O94776, |
| Q13126, |
| P11586, |
| P58546, |
| P15941  |
| Q9H3R2, |
| P35579, |
| P60660, |
| P60660, |
| P60660, |
|         |
| Q9UM54, |
| Q13765, |
| P54802, |
| Q9NR45, |
| P55209, |
| Q99733, |
| Q99747, |
| Q9BXJ9, |
| O43776, |
| P49321, |
| P13592  |
| P13591, |
| Q09161, |
| P19338, |
| P19338  |
| Q9HCD5, |
| Q92597, |
| P19404, |
| Q15843, |
| Q92832, |
| Q99435  |
| Q9UMX5, |
| Q92859, |
| Q92859, |
| Q99519, |
| O94856  |
| P55769, |
| P14543, |
| Q14112, |
| Q9BPW8, |
| Q9UFN0, |
| Q86X76  |
| Q8WUF0  |
| P08949, |
| P15531  |
| P22392  |
| Q13423, |
|         |
| O00567, |
| Q15155, |
| Q15233, |

|         |
|---------|
| Q9Y2X3, |
| Q04721, |
| Q9UM47, |
|         |
| P48745, |
| P00491, |
| P61916, |
| P55786, |
| P06748, |
| P06748, |
| Q15818, |
| Q15818  |
| P47972, |
| P15559  |
| P15559, |
| P16083, |
| Q92823, |
| Q92823, |
| Q92823  |
| O14786, |
| O14786, |
| O60462  |
| P46459, |
| Q9UNZ2, |
| Q9UNZ2, |
| Q9UNZ2  |
| Q9H0P0  |
| Q9HB63, |
| Q02818, |
| P80303, |
| Q9H1E3, |
| Q9Y266, |
| O43809, |
| Q9UKK9, |
| Q9BW91, |
| Q14980, |
| P61970, |
| Q86UD1  |
| Q9NX40  |
| Q99784, |
|         |
| Q68BL7  |
| Q9NRN5  |
| O60313  |
| Q13438, |
| Q13438, |
| Q13438, |
| Q96FW1  |
| Q96FW1, |
| P13674, |
| P07237, |
|         |
| Q9UQ80, |

|         |
|---------|
| P11940  |
| P11940, |
| Q13310, |
| Q86U42, |
| P43034, |
| P68402, |
| Q15102, |
| Q5JRK9, |
| P22234, |
| Q13153, |
| Q13177, |
| Q13177  |
| P19021, |
| P19021, |
| Q13219, |
| O43252, |
| Q99497, |
| P09874, |
| P43490, |
| P61457, |
| Q15365, |
| Q15366, |
| Q08174, |
| O14917  |
| Q8TAB3, |
| O60245, |
| Q9UN67, |
| Q9Y5E4, |
| Q9BXW1  |
| Q16822, |
| P22061, |
| P22061, |
| P12004, |
| Q15113, |
| Q9UKZ9, |
| P29120, |
| Q9UHG2, |
| P16519, |
| Q92824, |
| P29122, |
| Q8NBP7, |
| Q13442, |
| O14737, |
| O75340, |
| Q8WUM4, |
| Q9NRA1  |
| Q9GZP0, |
| Q15198, |
| P30101, |
| P13667, |
| Q15084, |
| Q96HC4, |
| Q15121, |

|         |
|---------|
| P30086, |
| P01210, |
| P12955, |
| O15067, |
| Q9UHV9, |
| Q9NQP4, |
| Q01813  |
| P07737, |
| P35080, |
| P52209, |
| P00558, |
| O95336, |
| Q96G03, |
| O00264, |
| O43175, |
| Q9NRX4, |
| Q13526, |
| O00625, |
| O75367  |
| P14618, |
| P14618, |
| Q9NZ20, |
| Q13093, |
| P00750, |
| P00749, |
| Q03405, |
| Q15149, |
| Q15149, |
| Q15149, |
| P00747, |
| Q02809, |
| O00469, |
| O60568, |
| O43660, |
| P13797, |
| P55058, |
| Q6UX71, |
| O15031, |
| Q9H307  |
| Q9NVS9, |
| Q9H488, |
| Q15063, |
| Q15181, |
| Q9H2U2  |
| P62937, |
| P23284, |
| Q9UNP9, |
| P30405, |
| Q9H2H8, |
| P35813, |
| Q8WY54  |
| O15355, |
| P62136, |

|         |
|---------|
| P62140, |
| Q96C90, |
| P67775, |
| P30153, |
| P53041, |
| P50897, |
| P50897, |
| Q9UMR5, |
| P42785  |
| Q06830, |
| P32119, |
| P30048, |
| Q13162, |
| P30044, |
| A6NG06  |
| P30041, |
| P14314, |
| P78527, |
| O14744, |
| Q9UNN8, |
| O43490, |
| P07225, |
| O94903, |
| Q9UMS4, |
| O94906, |
| P60891  |
| P11908, |
| Q7L2U7  |
| P07477, |
| P07478, |
| O95084, |
| P07602, |
| P07602, |
| Q9Y617  |
| O75475, |
| P25786, |
| P25787, |
| P25788, |
| P25789  |
| P25789, |
| P25789  |
| P28066, |
| P60900, |
| O14818, |
| O14818, |
| P20618, |
| P49721, |
| P49720, |
| P28070, |
| P28074, |
| Q99436, |
| P28062, |
| P43686, |
| P62195, |



|         |
|---------|
| P62333, |
| Q99460, |
| O00231, |
| O00232, |
| Q9UNM6, |
| Q13200, |
|         |
| O43242, |
| P55036, |
| P51665, |
| Q06323  |
| Q06323, |
| Q9UL46, |
| Q8WXF1  |
| P26599, |
| Q15185  |
| Q15185, |
| Q15185, |
| Q9P2B2, |
| Q13308, |
| Q13308, |
| Q8IUI5  |
| Q06124  |
| Q05209, |
| P23468, |
| P10586, |
| P10586, |
| P23470, |
| Q15262, |
| Q13332  |
| P23471, |
| Q6NZI2, |
| P26022, |
| P15151, |
| P15151, |
| Q15223, |
| Q92692, |
| Q4KMG2  |
| Q4KMG2  |
| P11216, |
| P06737, |
| P47897, |
| Q16769, |
| O00391, |
| O00391, |
| Q6ZRP7, |
| Q15907, |
| P61106, |
| P61019  |
| P51149, |
| P54725, |
| P54727, |
| P78406  |

|         |
|---------|
| Q9UKM9, |
| P62826, |
|         |
|         |
| P62826, |
| P43487, |
| P49792, |
| Q9H6Z4, |
| O00410, |
| O00410, |
| P46060, |
| P62834, |
| P61224, |
| P54136, |
| Q09028, |
| Q16576, |
|         |
| Q8IXT5  |
| Q96T37, |
| Q9NW64, |
| P49756, |
| P98179, |
| Q9Y5S9, |
| P38159, |
| Q6YP21  |
| P09455, |
| P18754, |
| Q9P258, |
| Q15293, |
| P46063, |
| Q8IUW5  |
| P35251  |
| Q9Y644  |
| P61586, |
| P08134, |
| P34096, |
| P03950, |
| O00584, |
| O75150, |
| P13489, |
|         |
| Q9H4A4  |
| Q9H4A4, |
| Q9Y6N7  |
| O75116, |
| Q5JQC4  |
| P27694, |
| P15927, |
| P35244, |
| P62906, |
| P62913, |
| P30050, |

|                |
|----------------|
| P50914         |
| P18621,        |
| Q07020,        |
| P35268,        |
| P62750,        |
| P61353,        |
| P62888,        |
| P63173,        |
| P36578,        |
| P46777,        |
| P62917,        |
| P05388,        |
| P05388,        |
| P05386,        |
| P05387,        |
| P46783,        |
| P62280,        |
| P25398,        |
| P62277,        |
| P62263,        |
| P39019,        |
| P15880,        |
| P60866,        |
| P63220,        |
| P62988,P62987, |
| P62987,        |
| P23396,        |
| P61247,        |
| P62701,        |
| P46782,        |
| P62081,        |
| P62241,        |
| P08865,        |
| Q9P2E9,        |
| Q9P2E9,        |
| P23921,        |
| Q9BSG5,        |
| Q9NQC3,        |
| Q9Y265,        |
| Q9Y230,        |
| P60903,        |
| P31949,        |
| Q9UBT2,        |
| Q15424,        |
| Q14151,        |
| P49591         |
| O43290,        |
| Q15020,        |
| O14828,        |
| Q8WTV0,        |
| P13521,        |
| Q8WXD2,        |
| P05408,        |

|         |
|---------|
| Q9HB40, |
| Q8IWY4, |
| Q12904  |
| Q12904, |
| P18827, |
| P31431, |
| O00560, |
| Q99470, |
| Q9HCN8, |
| Q9BRK5, |
| O95810, |
| Q96GA7  |
| Q15437, |
| Q8WVN6, |
| Q13228  |
| Q14563, |
| Q99985, |
| O95025, |
| O15041, |
| Q9NS98, |
| Q9NPR2, |
| Q9C0C4, |
| Q92854, |
| O75326, |
| O60613, |
| P49903, |
| Q15019, |
| Q16181, |
| Q9UHD8, |
| Q9UHD8, |
| Q9UHD8, |
| Q8NC51, |
| Q8NC51, |
| P01009, |
| P30740, |
| P05120, |
| P36952, |
| P50453, |
| P07093, |
| P36955, |
| P05155, |
| P50454, |
| Q99574, |
| Q01105, |
| Q01105, |
| Q9BW82  |
|         |
| Q15637, |
| Q15459, |
| Q15428, |
| Q12874, |
| O75533, |

|         |
|---------|
| Q13435, |
| Q15393, |
| Q15427, |
| Q9BWJ5, |
| P31947, |
| P23246, |
| Q8N474, |
| Q07955  |
| Q07955, |
| P62995, |
| Q01130, |
| P84103, |
| Q16629, |
| Q13242, |
| O43556, |
| O43765, |
| Q9H299  |
|         |
| Q15465, |
| P34897, |
| Q9HAT2, |
| Q96D94  |
| Q96D94  |
| Q9H173, |
| P42285, |
| P63208, |
| Q15758, |
| Q9UJS0, |
| P11166, |
| Q9ULF5  |
| P08195, |
| P08195  |
| Q8VWI5, |
| O75094, |
| Q9H5Y7, |
| P03973, |
| O60264, |
| Q92922  |
| Q92922, |
| Q8TAQ2, |
| Q969G3  |
| Q14683, |
| Q9UQE7, |
| Q9H4F8, |
| Q9H4F8, |
| Q9H3U7, |
| Q9H3U7  |
| P52788, |
| Q7KZF4, |
| P08621, |
| P09012, |
| P14678, |
| P08579, |

|         |
|---------|
| P09234, |
| P62314, |
| P62316, |
| P62318, |
| P62304, |
| P62308, |
| Q13573, |
| P00441, |
| P04179, |
| P18583  |
| Q00796, |
| Q92673, |
| Q99523, |
| O43278, |
| O43278, |
| Q08629, |
| Q92563, |
| P10451, |
| P10451  |
| Q13813, |
| Q13813, |
| Q13813, |
| Q01082, |
| Q13501, |
| O15042  |
| P10124, |
| P37108  |
| P37108, |
| P61011, |
| P49458, |
| P78539, |
| O60687  |
| Q9UQ35, |
| Q9BYN0, |
| P05455, |
| Q08945, |
| P50502, |
| Q9Y5Y6, |
| Q11201, |
| P15907, |
| Q92187, |
| O95793, |
| P52823, |
| O76061, |
| P48723, |
| P31948, |
| P16949, |
| P16949  |
| Q9Y3F4, |
| Q15833, |
| P53999, |
| Q8NB7,  |
| Q8NB7,  |

|         |
|---------|
| Q9Y5B9, |
| Q7KZ85, |
|         |
| Q9UH65, |
| O60506, |
| Q8WXH0, |
| O95359  |
| P16422, |
| Q92804, |
| P37802  |
| P37802, |
| P37837, |
| P37837, |
| Q13148, |
| P26639, |
| O75347, |
| Q99426, |
| Q15369, |
| Q15370, |
| O14776, |
| P20062, |
| P17987, |
| Q92734, |
| P10646, |
| P48307, |
| P02786, |
| P01137, |
| P61812, |
| Q15582, |
| Q03167, |
| P21980, |
| P07996, |
| P49746, |
| Q86V81, |
| P52888, |
| Q9Y2W1, |
|         |
| Q01085, |
| O60220, |
| P01033, |
| P16035, |
| P16035, |
| Q9GZM7, |
| P29401, |
| P29401, |
| Q9Y490, |
| Q9Y490, |
| Q24JP5  |
| Q96PK6, |
| Q9Y2B0, |
| Q9NYL9, |
| P42167, |

|                |
|----------------|
| P42166,        |
| P24821,        |
| O00300,        |
| Q969Z4,        |
| P19438,        |
| Q92973,        |
| O14787         |
| O94826,        |
| P11387,        |
| P11388,        |
| O14657,        |
| Q9H497,        |
| Q12888,        |
| P55327,        |
| Q16890,        |
| O43399         |
| O43399,        |
| P60174,        |
| P09493,        |
| P07951,        |
| P06753,        |
| P06753         |
| P67936,        |
| O14773,O14773, |
| P29144         |
| P12270,        |
| P13693,        |
|                |
| Q12931,        |
| Q13263,        |
| Q6ZMU5         |
| Q15643,        |
| P10155,        |
| Q8WUA8,        |
| Q15631,        |
| P62079,        |
| Q14166,        |
| Q71U36,        |
| P68363         |
| P68363,        |
| Q9BQE3,        |
| P07437,        |
| Q13885         |
| Q9BVA1         |
| P68371,        |
| Q13509,        |
| P04350,        |
|                |
| Q9BUF5,        |
| Q12792,        |
| Q6IBS0,        |
| Q9GZX9         |



|                       |
|-----------------------|
| P10599,               |
| O95881,               |
| Q9BS26,               |
| Q8NBS9                |
| O43396,               |
| O76003,               |
| Q9BRA2,               |
| Q16881                |
| Q01081,               |
| P26368                |
| P26368,               |
| P62988,P62987,        |
| Q14157,               |
|                       |
| P22314,               |
| Q8TBC4,               |
| P63279,               |
| P68036,               |
| P61088,               |
| Q13404,Q15819,        |
| Q15819                |
| Q9UMX0,               |
| Q9NRR5,               |
| P09936,               |
| Q9Y5K5,               |
| Q9Y3C8,               |
|                       |
| Q9NYU2,               |
| Q9NYU2,               |
| O60701,               |
| Q07131,Q16851,Q16851, |
| Q49AN5                |
| Q92900,               |
| P06132,               |
| P54578,               |
| Q9Y4E8,               |
| P45974,               |
| P45974,               |
| Q93009,               |
| Q93009,               |
| Q9BVJ6,               |
| Q8NBZ7,               |
| Q9P0L0,               |
| Q9P0L0,               |
| P26640,               |
| Q6EMK4,               |
| Q99536,               |
| P61758,               |
| P13611,               |
| P18206,               |
| P18206,               |
| P55072,               |
| P49767,               |

|         |
|---------|
| O15240  |
| P09327, |
| P15311, |
| P08670, |
| Q7Z434, |
| Q6UXI7, |
| Q9UBQ0, |
| Q96QK1, |
| P62760, |
| Q6PCB0  |
|         |
| P23381  |
| P23381, |
| O75083, |
| O75083  |
| Q9GZS3, |
| Q9BQA1, |
| Q14508, |
| Q9Y5W5, |
| O76076, |
| P41221, |
| O14980, |
| P13010, |
| P12956, |
| Q9H773  |
| Q86Y38, |
| Q9H1B5, |
|         |
| P54577, |
| P67809, |
| P67809  |
| P67809, |
| P07947, |
|         |
| P31946, |
| P62258, |
| P61981, |
| Q04917, |
| P27348, |
| P63104, |
| Q96KR1  |
| O43670, |
| O43670, |
