# Supplementary material
Source: PubMed Central journal article supplement (PMC2816016)
Supplement: M900134-MCP200_6.pdf [file M900134-MCP200_6.pdf]

## Supplementary Table 11: List of total membrane proteins identified in the 4

### Found in Human Plasma Proteome Database

| Protein name                                                                                         |
|------------------------------------------------------------------------------------------------------|
| Gene_Symbol=- 67 kDa protein                                                                         |
| Gene_Symbol=ACBD3 Golgi resident protein GCP60                                                       |
| Gene_Symbol=ACE Angiotensin-converting enzyme, somatic isoform precursor                             |
| Gene_Symbol=ADAM10 ADAM 10 precursor                                                                 |
| Gene_Symbol=ADAM15 a disintegrin and metalloproteinase domain 15 isoform 3 preproprotein             |
| Gene_Symbol=ADAM15 a disintegrin and metalloproteinase domain 15 isoform 4 preproprotein             |
| Gene_Symbol=ADAM17 Isoform A of ADAM 17 precursor                                                    |
| Gene_Symbol=ADAM17 Isoform B of ADAM 17 precursor                                                    |
| Gene_Symbol=ADAM19 Isoform A of ADAM 19 precursor                                                    |
| Gene_Symbol=ADAM23 Isoform Alpha of ADAM 23 precursor                                                |
| Gene_Symbol=ADAM9 Isoform 1 of ADAM 9 precursor                                                      |
| Gene_Symbol=ADI1 Isoform 1 of 1,2-dihydroxy-3-keto-5-methylthiopentene dioxygenase                   |
| Gene_Symbol=ADRM1 Adhesion-regulating molecule 1 precursor                                           |
| Gene_Symbol=AIP AH receptor-interacting protein                                                      |
| Gene_Symbol=AKR1A1 Alcohol dehydrogenase                                                             |
| Gene_Symbol=ALCAM Isoform 1 of CD166 antigen precursor                                               |
| Gene_Symbol=ALDH3A2 Isoform 1 of Fatty aldehyde dehydrogenase                                        |
| Gene_Symbol=AMBP AMBP protein precursor                                                              |
| Gene_Symbol=ANTXR1 Isoform 1 of Anthrax toxin receptor 1 precursor                                   |
| Gene_Symbol=ANXA1 Annexin A1                                                                         |
| Gene_Symbol=ANXA2 annexin A2 isoform 1                                                               |
| Gene_Symbol=APLP1 Amyloid-like protein 1 precursor                                                   |
| Gene_Symbol=APLP2 Isoform 1 of Amyloid-like protein 2 precursor                                      |
| Gene_Symbol=APP Isoform APP770 of Amyloid beta A4 protein precursor (Fragment)                       |
| Gene_Symbol=ARCN1 Coatomer subunit delta                                                             |
| Gene_Symbol=ARF1 ADP-ribosylation factor 1                                                           |
| Gene_Symbol=ARSA Hypothetical protein DKFZp686G12235                                                 |
| Gene_Symbol=ARTS-1 type 1 tumor necrosis factor receptor shedding aminopeptidase regulator isoform a |
| Gene_Symbol=ATP1A1 Isoform Long of Sodium/potassium-transporting ATPase alpha-1 chain precursor      |
| Gene_Symbol=ATP1A2 Sodium/potassium-transporting ATPase alpha-2 chain precursor                      |
| Gene_Symbol=ATP1B3 Sodium/potassium-transporting ATPase subunit beta-3                               |
| Gene_Symbol=ATP5A1 ATP synthase subunit alpha, mitochondrial precursor                               |
| Gene_Symbol=ATP5J ATP synthase coupling factor 6, mitochondrial precursor                            |
| Gene_Symbol=ATP6AP1 53 kDa protein                                                                   |
| Gene_Symbol=ATP6AP2 Protein                                                                          |
| Gene_Symbol=ATP6AP2 Renin receptor precursor                                                         |
| Gene_Symbol=ATP6V1A Vacuolar ATP synthase catalytic subunit A, ubiquitous isoform                    |
| Gene_Symbol=ATP6V1B2 Vacuolar ATP synthase subunit B, brain isoform                                  |
| Gene_Symbol=ATRN Isoform 1 of Attractin precursor                                                    |
| Gene_Symbol=AXL AXL receptor tyrosine kinase isoform 1                                               |
| Gene_Symbol=AZGP1 alpha-2-glycoprotein 1, zinc                                                       |
| Gene_Symbol=B2M Beta-2-microglobulin precursor                                                       |
| Gene_Symbol=B3GALT6 Beta-1,3-galactosyltransferase 6                                                 |
| Gene_Symbol=B3GNT1 N-acetyllactosaminide beta-1,3-N-acetylglucosaminyltransferase                    |

|                                                                                                  |
|--------------------------------------------------------------------------------------------------|
| Gene_Symbol=B3GNT2 Isoform 2 of UDP-GlcNAc:betaGal beta-1,3-N-acetylglucosaminyltransferase 2    |
| Gene_Symbol=B4GALT1 Isoform Long of Beta-1,4-galactosyltransferase 1                             |
| Gene_Symbol=B4GALT1 Isoform Short of Beta-1,4-galactosyltransferase 1                            |
| Gene_Symbol=B4GALT4 Beta-1,4-galactosyltransferase 4                                             |
| Gene_Symbol=BASP1 Brain acid soluble protein 1                                                   |
| Gene_Symbol=BID Isoform 1 of BH3-interacting domain death agonist                                |
| Gene_Symbol=BSG 46 kDa protein                                                                   |
| Gene_Symbol=BSG Isoform 2 of Basigin precursor                                                   |
| Gene_Symbol=BST1 ADP-ribosyl cyclase 2 precursor                                                 |
| Gene_Symbol=C1QBP Complement component 1 Q subcomponent-binding protein, mitochondrial precursor |
| Gene_Symbol=C3orf17 Isoform 1 of Uncharacterized protein C3orf17                                 |
| Gene_Symbol=CADM1 Nectin-like protein 2                                                          |
| Gene_Symbol=CALM3;CALM2;CALM1 Calmodulin                                                         |
| Gene_Symbol=CANT1 Isoform 1 of Soluble calcium-activated nucleotidase 1                          |
| Gene_Symbol=CANX Calnexin precursor                                                              |
| Gene_Symbol=CAP1 Adenylyl cyclase-associated protein 1                                           |
| Gene_Symbol=CAPN1 Calpain-1 catalytic subunit                                                    |
| Gene_Symbol=CCL2 Small inducible cytokine A2 precursor                                           |
| Gene_Symbol=CD109 Isoform 1 of CD109 antigen precursor                                           |
| Gene_Symbol=CD14 Monocyte differentiation antigen CD14 precursor                                 |
| Gene_Symbol=CD276 Isoform 1 of CD276 antigen precursor                                           |
| Gene_Symbol=CD44 Isoform 12 of CD44 antigen precursor                                            |
| Gene_Symbol=CD44 Isoform 4 of CD44 antigen precursor                                             |
| Gene_Symbol=CD44 Isoform CD44 of CD44 antigen precursor                                          |
| Gene_Symbol=CD46 CD46 antigen, complement regulatory protein isoform 13 precursor                |
| Gene_Symbol=CD55 Isoform 1 of Complement decay-accelerating factor precursor                     |
| Gene_Symbol=CD70 Tumor necrosis factor ligand superfamily member 7                               |
| Gene_Symbol=CD81 CD81 antigen                                                                    |
| Gene_Symbol=CD9 CD9 antigen                                                                      |
| Gene_Symbol=CDC42 Isoform 1 of Cell division control protein 42 homolog precursor                |
| Gene_Symbol=CDH1 Epithelial-cadherin precursor                                                   |
| Gene_Symbol=CDH10 Cadherin-10 precursor                                                          |
| Gene_Symbol=CDH11 Isoform 2 of Cadherin-11 precursor                                             |
| Gene_Symbol=CDH13 Cadherin-13 precursor                                                          |
| Gene_Symbol=CDH17 Cadherin-17 precursor                                                          |
| Gene_Symbol=CDH2 Cadherin-2 precursor                                                            |
| Gene_Symbol=CDH3 Cadherin-3 precursor                                                            |
| Gene_Symbol=CDH3 CDH3 protein                                                                    |
| Gene_Symbol=CEACAM5 Carcinoembryonic antigen-related cell adhesion molecule 5 precursor          |
| Gene_Symbol=CHL1 Isoform 1 of Neural cell adhesion molecule L1-like protein precursor            |
| Gene_Symbol=CHL1 Isoform 2 of Neural cell adhesion molecule L1-like protein precursor            |
| Gene_Symbol=CHPF Chondroitin sulfate synthase 2                                                  |
| Gene_Symbol=CHST11 Isoform 1 of Carbohydrate sulfotransferase 11                                 |
| Gene_Symbol=CLIC1 Chloride intracellular channel protein 1                                       |
| Gene_Symbol=CLSTN1 calsyntenin 1 isoform 2                                                       |
| Gene_Symbol=CLSTN1 Calsyntenin-1 precursor                                                       |
| Gene_Symbol=CLSTN2 Calsyntenin-2 precursor                                                       |
| Gene_Symbol=CLSTN3 Alcadein beta                                                                 |
| Gene_Symbol=CLSTN3 Calsyntenin-3 precursor                                                       |
| Gene_Symbol=CNN2 Calponin-2                                                                      |
| Gene_Symbol=CNTN1 Isoform 1 of Contactin-1 precursor                                             |
| Gene_Symbol=COL4A2 Collagen alpha-2(IV) chain precursor                                          |

|                                                                                                           |
|-----------------------------------------------------------------------------------------------------------|
| Gene_Symbol=COL4A6 Isoform B of Collagen alpha-6(IV) chain precursor                                      |
| Gene_Symbol=CPD Carboxypeptidase D precursor                                                              |
| Gene_Symbol=CPE Carboxypeptidase E precursor                                                              |
| Gene_Symbol=CRIM1 Cysteine-rich motor neuron 1 protein precursor                                          |
| Gene_Symbol=CSF1 Isoform 1 of Macrophage colony-stimulating factor 1 precursor                            |
| Gene_Symbol=CTGF Isoform 1 of Connective tissue growth factor precursor                                   |
| Gene_Symbol=CTNNB1 Isoform 1 of Catenin beta-1                                                            |
| Gene_Symbol=CTNNB1 similar to Beta-catenin                                                                |
| Gene_Symbol=CUTA Isoform B of Protein CutA precursor                                                      |
| Gene_Symbol=CXCL1 Growth-regulated protein alpha precursor                                                |
| Gene_Symbol=D4ST1 Carbohydrate sulfotransferase D4ST1                                                     |
| Gene_Symbol=DAG1 Dystroglycan precursor                                                                   |
| Gene_Symbol=DDR1 Isoform 1 of Epithelial discoidin domain-containing receptor 1 precursor                 |
| Gene_Symbol=DKK1 Dickkopf-related protein 1 precursor                                                     |
| Gene_Symbol=DLG1 Isoform 1 of Disks large homolog 1                                                       |
| Gene_Symbol=DNAJA1 DnaJ homolog subfamily A member 1                                                      |
| Gene_Symbol=DNAJA2 DnaJ homolog subfamily A member 2                                                      |
| Gene_Symbol=DNER Delta and Notch-like epidermal growth factor-related receptor precursor                  |
| Gene_Symbol=DNM1L Isoform 4 of Dynamin-1-like protein                                                     |
| Gene_Symbol=DSC2 Isoform 2A of Desmocollin-2 precursor                                                    |
| Gene_Symbol=DSG2 desmoglein 2 preproprotein                                                               |
| Gene_Symbol=DSP Isoform DPI of Desmoplakin                                                                |
| Gene_Symbol=EBNA1BP2 EBNA1 binding protein 2                                                              |
| Gene_Symbol=EFNA1 Isoform 1 of Ephrin-A1 precursor                                                        |
| Gene_Symbol=EFNA5 Ephrin-A5 precursor                                                                     |
| Gene_Symbol=EFNB1 Ephrin-B1 precursor                                                                     |
| Gene_Symbol=EGFL9 Isoform 1 of EGF-like domain-containing protein 9 precursor                             |
| Gene_Symbol=ENPP2 Isoform 1 of Ectonucleotide pyrophosphatase/phosphodiesterase family member 2 precursor |
| Gene_Symbol=ENTPD6 Ectonucleoside triphosphate diphosphohydrolase 6                                       |
| Gene_Symbol=EPB41L3 Isoform A of Band 4.1-like protein 3                                                  |
| Gene_Symbol=EPHA4 Ephrin type-A receptor 4 precursor                                                      |
| Gene_Symbol=EPHA5 Isoform 1 of Ephrin type-A receptor 5 precursor                                         |
| Gene_Symbol=EPHX1 Epoxide hydrolase 1                                                                     |
| Gene_Symbol=EXT1 Exostosin-1                                                                              |
| Gene_Symbol=EXTL2 EXTL2 protein (Fragment)                                                                |
| Gene_Symbol=F11R Junctional adhesion molecule A precursor                                                 |
| Gene_Symbol=FAT Cadherin-related tumor suppressor homolog precursor                                       |
| Gene_Symbol=FBN1 Fibrillin-1 precursor                                                                    |
| Gene_Symbol=FBN2 fibrillin 2 precursor                                                                    |
| Gene_Symbol=FER1L3 Isoform 1 of Myoferlin                                                                 |
| Gene_Symbol=FGFBP1 Fibroblast growth factor-binding protein 1 precursor                                   |
| Gene_Symbol=FGFR1 Isoform 14 of Basic fibroblast growth factor receptor 1 precursor                       |
| Gene_Symbol=FGFRL1 Fibroblast growth factor receptor-like 1 precursor                                     |
| Gene_Symbol=FLNB Isoform 1 of Filamin-B                                                                   |
| Gene_Symbol=FLNC Gamma filamin variant                                                                    |
| Gene_Symbol=FRAS1 Isoform 2 of Extracellular matrix protein FRAS1 precursor                               |
| Gene_Symbol=FREM2 Isoform 1 of FRAS1-related extracellular matrix protein 2 precursor                     |
| Gene_Symbol=FURIN Furin precursor                                                                         |
| Gene_Symbol=GALNAC4S-6ST Isoform 1 of N-acetylgalactosamine 4-sulfate 6-O-sulfotransferase                |
| Gene_Symbol=GALNT10 Isoform 1 of Polypeptide N-acetylgalactosaminyltransferase 10                         |
| Gene_Symbol=GALNT2 Polypeptide N-acetylgalactosaminyltransferase 2                                        |
| Gene_Symbol=GALNT5 Polypeptide N-acetylgalactosaminyltransferase 5                                        |

|                                                                                                                         |
|-------------------------------------------------------------------------------------------------------------------------|
| Gene_Symbol=GALNT6 Polypeptide N-acetylgalactosaminyltransferase 6                                                      |
| Gene_Symbol=GALNT7 N-acetylgalactosaminyltransferase 7                                                                  |
| Gene_Symbol=GALNTL1 Isoform 1 of Putative polypeptide N-acetylgalactosaminyltransferase-like protein 1                  |
| Gene_Symbol=GBA Isoform Long of Glucosylceramidase precursor                                                            |
| Gene_Symbol=GDI2 GDP dissociation inhibitor 2                                                                           |
| Gene_Symbol=GDI2 Rab GDP dissociation inhibitor beta                                                                    |
| Gene_Symbol=GIPC1 PDZ domain-containing protein GIPC1                                                                   |
| Gene_Symbol=GLG1 golgi apparatus protein 1                                                                              |
| Gene_Symbol=GOLPH2 Golgi phosphoprotein 2                                                                               |
| Gene_Symbol=GOLPH2 Isoform 2 of Golgi phosphoprotein 2                                                                  |
| Gene_Symbol=GORASP2 Isoform 1 of Golgi reassembly-stacking protein 2                                                    |
| Gene_Symbol=GORASP2 Isoform 2 of Golgi reassembly-stacking protein 2                                                    |
| Gene_Symbol=GPC1 Glypican-1 precursor                                                                                   |
| Gene_Symbol=GPC4 Glypican-4 precursor                                                                                   |
| Gene_Symbol=GPC6 Glypican-6 precursor                                                                                   |
| Gene_Symbol=GPIAP1 GPI-anchored membrane protein 1                                                                      |
| Gene_Symbol=GPIAP1 membrane component chromosome 11 surface marker 1 isoform 1                                          |
| Gene_Symbol=GPR126 Developmentally regulated G-protein-coupled receptor alpha 2                                         |
| Gene_Symbol=GPR126 Developmentally regulated G-protein-coupled receptor beta 1                                          |
| Gene_Symbol=GPR37 Probable G-protein coupled receptor 37 precursor                                                      |
| Gene_Symbol=GPR56 G protein-coupled receptor 56 isoform b                                                               |
| Gene_Symbol=HDLBP Vigilin                                                                                               |
| Gene_Symbol=HEXA Beta-hexosaminidase alpha chain precursor                                                              |
| Gene_Symbol=HEXB Beta-hexosaminidase beta chain precursor                                                               |
| Gene_Symbol=HK1 Isoform 1 of Hexokinase-1                                                                               |
| Gene_Symbol=HLA-A HLA class I histocompatibility antigen, A-2 alpha chain precursor                                     |
| Gene_Symbol=HLA-A HLA class I histocompatibility antigen, A-24 alpha chain precursor                                    |
| Gene_Symbol=HLA-A HLA class I histocompatibility antigen, A-68 alpha chain precursor                                    |
| Gene_Symbol=HLA-A HLA class I histocompatibility antigen, A-69 alpha chain                                              |
| Gene_Symbol=HLA-A HLA class I histocompatibility antigen, A-80 alpha chain precursor                                    |
| Gene_Symbol=HLA-A Isoform 2 of HLA class I histocompatibility antigen, A-11 alpha chain precursor                       |
| Gene_Symbol=HLA-C;HLA-B;MICA;LOC730410 HLA class I histocompatibility antigen, B-50 alpha chain precursor               |
| Gene_Symbol=HLA-C;HLA-B;MICA;LOC730410 HLA class I histocompatibility antigen, B-56 alpha chain precursor               |
| Gene_Symbol=HLA-C;HLA-B;MICA;LOC730410 HLA class I histocompatibility antigen, B-58 alpha chain precursor               |
| Gene_Symbol=HLA-C;HLA-B;MICA;LOC730410 HLA class I histocompatibility antigen, Cw-15 alpha chain precursor              |
| Gene_Symbol=HLA-C;HLA-B;MICA;LOC730410 HLA class I histocompatibility antigen, Cw-2 alpha chain precursor               |
| Gene_Symbol=HLA-C;HLA-B;MICA;LOC730410 HLA class I histocompatibility antigen, Cw-3 alpha chain precursor               |
| Gene_Symbol=HLA-C;HLA-B;MICA;LOC730410 HLA class I histocompatibility antigen, Cw-6 alpha chain precursor               |
| Gene_Symbol=HLA-C;HLA-B;MICA;LOC730410 Isoform 2 of HLA class I histocompatibility antigen, Cw-16 alpha chain precursor |
| Gene_Symbol=HLA-C;HLA-B;MICA;LOC730410 Major histocompatibility complex, class I, C                                     |
| Gene_Symbol=HLA-H HLA class I histocompatibility antigen, alpha chain H precursor                                       |
| Gene_Symbol=HNRPM Isoform 1 of Heterogeneous nuclear ribonucleoprotein M                                                |
| Gene_Symbol=HNRPM Isoform 2 of Heterogeneous nuclear ribonucleoprotein M                                                |
| Gene_Symbol=HS6ST2 Isoform 1 of Heparan-sulfate 6-O-sulfotransferase 2                                                  |
| Gene_Symbol=HSPA5 HSPA5 protein                                                                                         |
| Gene_Symbol=HSPA8 Isoform 1 of Heat shock cognate 71 kDa protein                                                        |
| Gene_Symbol=HSPA9 Heat shock 70kDa protein 9B variant (Fragment)                                                        |
| Gene_Symbol=HSPA9 Stress-70 protein, mitochondrial precursor                                                            |
| Gene_Symbol=HSPB1 Heat-shock protein beta-1                                                                             |
| Gene_Symbol=HSPG2 Basement membrane-specific heparan sulfate proteoglycan core protein precursor                        |
| Gene_Symbol=ICAM1 Intercellular adhesion molecule 1 precursor                                                           |
| Gene_Symbol=ICAM5 Intercellular adhesion molecule 5 precursor                                                           |

|                                                                                                              |
|--------------------------------------------------------------------------------------------------------------|
| Gene_Symbol=ICOSLG 52 kDa protein                                                                            |
| Gene_Symbol=IGF2R Cation-independent mannose-6-phosphate receptor precursor                                  |
| Gene_Symbol=IGSF8 Isoform 1 of Immunoglobulin superfamily member 8 precursor                                 |
| Gene_Symbol=IL13RA1 Interleukin-13 receptor alpha-1 chain precursor                                          |
| Gene_Symbol=IL1R2 Interleukin-1 receptor type II precursor                                                   |
| Gene_Symbol=IL6ST Isoform 1 of Interleukin-6 receptor subunit beta precursor                                 |
| Gene_Symbol=IMMT Isoform 1 of Mitochondrial inner membrane protein                                           |
| Gene_Symbol=IQGAP1 Ras GTPase-activating-like protein IQGAP1                                                 |
| Gene_Symbol=ITM2B Integral membrane protein 2B                                                               |
| Gene_Symbol=JAG1 Jagged-1 precursor                                                                          |
| Gene_Symbol=KCTD12 BTB/POZ domain-containing protein KCTD12                                                  |
| Gene_Symbol=KHDRBS1 Isoform 1 of KH domain-containing, RNA-binding, signal transduction-associated protein 1 |
| Gene_Symbol=KHDRBS1 Isoform 3 of KH domain-containing, RNA-binding, signal transduction-associated protein 1 |
| Gene_Symbol=KIT Mast/stem cell growth factor receptor precursor                                              |
| Gene_Symbol=KITLG Isoform 2 of Kit ligand precursor                                                          |
| Gene_Symbol=KREMEN1 Isoform 1 of Kremen protein 1 precursor                                                  |
| Gene_Symbol=KTN1 Isoform 1 of Kinectin                                                                       |
| Gene_Symbol=L1CAM Isoform 1 of Neural cell adhesion molecule L1 precursor                                    |
| Gene_Symbol=LAMA1 Laminin subunit alpha-1 precursor                                                          |
| Gene_Symbol=LAMA5 Laminin subunit alpha-5 precursor                                                          |
| Gene_Symbol=LAMB1 Laminin subunit beta-1 precursor                                                           |
| Gene_Symbol=LAMB2 Laminin subunit beta-2 precursor                                                           |
| Gene_Symbol=LAMC1 Laminin subunit gamma-1 precursor                                                          |
| Gene_Symbol=LCP1 Plastin-2                                                                                   |
| Gene_Symbol=LDLR Low-density lipoprotein receptor                                                            |
| Gene_Symbol=LDLR Low-density lipoprotein receptor precursor                                                  |
| Gene_Symbol=LEMD3 Inner nuclear membrane protein Man1                                                        |
| Gene_Symbol=LFNG Isoform 1 of Beta-1,3-N-acetylglucosaminyltransferase lunatic fringe                        |
| Gene_Symbol=LGALS3 Galectin-3                                                                                |
| Gene_Symbol=LGALS3BP Galectin-3-binding protein precursor                                                    |
| Gene_Symbol=LMAN1 ERGIC-53 protein precursor                                                                 |
| Gene_Symbol=LMAN2 Vesicular integral-membrane protein VIP36 precursor                                        |
| Gene_Symbol=LOC253012 WLKV305                                                                                |
| Gene_Symbol=LOXL2 Lysyl oxidase-like 2 variant                                                               |
| Gene_Symbol=LOXL2;ENTPD4 Lysyl oxidase homolog 2 precursor                                                   |
| Gene_Symbol=LPHN1 Isoform 1 of Latrophilin-1 precursor                                                       |
| Gene_Symbol=LRP11 Isoform 1 of Low-density lipoprotein receptor-related protein 11 precursor                 |
| Gene_Symbol=LRP2 Low-density lipoprotein receptor-related protein 2 precursor                                |
| Gene_Symbol=LRP8 Isoform 1 of Low-density lipoprotein receptor-related protein 8 precursor                   |
| Gene_Symbol=LRRRC59 Leucine-rich repeat-containing protein 59                                                |
| Gene_Symbol=LRRTM1 Leucine-rich repeat transmembrane neuronal protein 1 precursor                            |
| Gene_Symbol=LSR Isoform 1 of Lipolysis-stimulated lipoprotein receptor                                       |
| Gene_Symbol=LSR Isoform 2 of Lipolysis-stimulated lipoprotein receptor                                       |
| Gene_Symbol=M6PRBP1 Isoform B of Mannose-6-phosphate receptor-binding protein 1                              |
| Gene_Symbol=MAN1A2 Mannosyl-oligosaccharide 1,2-alpha-mannosidase IB                                         |
| Gene_Symbol=MAN1B1 Endoplasmic reticulum mannosyl-oligosaccharide 1,2-alpha-mannosidase                      |
| Gene_Symbol=MARCKS Myristoylated alanine-rich C-kinase substrate                                             |
| Gene_Symbol=MARCKSL1 MARCKS-related protein                                                                  |
| Gene_Symbol=MCAM Isoform 1 of Cell surface glycoprotein MUC18 precursor                                      |
| Gene_Symbol=MET Isoform 1 of Hepatocyte growth factor receptor precursor                                     |
| Gene_Symbol=MFGE8 Lactadherin precursor                                                                      |
| Gene_Symbol=MGAT2 Alpha-1,6-mannosyl-glycoprotein 2-beta-N-acetylglucosaminyltransferase                     |

|                                                                                           |
|-------------------------------------------------------------------------------------------|
| Gene_Symbol=MGAT5 Alpha-1,6-mannosylglycoprotein 6-beta-N-acetylglucosaminyltransferase V |
| Gene_Symbol=MIA3 similar to melanoma inhibitory activity 3 isoform 1                      |
| Gene_Symbol=MICB MHC class I antigen                                                      |
| Gene_Symbol=MLLT4 Isoform 4 of Afadin                                                     |
| Gene_Symbol=MRC2 Macrophage mannose receptor 2 precursor                                  |
| Gene_Symbol=MSN Moesin                                                                    |
| Gene_Symbol=MUC1 Isoform 1 of Mucin-1 precursor                                           |
| Gene_Symbol=MUC13 Mucin-13 precursor                                                      |
| Gene_Symbol=MYH9 Myosin-9                                                                 |
| Gene_Symbol=NAPG Gamma-soluble NSF attachment protein                                     |
| Gene_Symbol=NCAM1 Neural cell adhesion molecule 1, 120 kDa isoform variant (Fragment)     |
| Gene_Symbol=NCAM1 Neural cell adhesion molecule 1, 140 kDa isoform precursor              |
| Gene_Symbol=NEO1 Isoform 1 of Neogenin precursor                                          |
| Gene_Symbol=NEO1 Isoform 2 of Neogenin precursor                                          |
| Gene_Symbol=NFASC Isoform 7 of Neurofascin precursor                                      |
| Gene_Symbol=NID1 Isoform 1 of Nidogen-1 precursor                                         |
| Gene_Symbol=NID2 Nidogen-2 precursor                                                      |
| Gene_Symbol=NNT NAD(P) transhydrogenase, mitochondrial precursor                          |
| Gene_Symbol=NOMO1 Nodal modulator 1 precursor                                             |
| Gene_Symbol=NOTCH2 Neurogenic locus notch homolog protein 2 precursor                     |
| Gene_Symbol=NOTCH3 Neurogenic locus notch homolog protein 3 precursor                     |
| Gene_Symbol=NRCAM Isoform 1 of Neuronal cell adhesion molecule precursor                  |
| Gene_Symbol=NRCAM Isoform 3 of Neuronal cell adhesion molecule precursor                  |
| Gene_Symbol=NRCAM NRCAM protein                                                           |
| Gene_Symbol=NRP1 Isoform 1 of Neuropilin-1 precursor                                      |
| Gene_Symbol=NRP1 Muscle type neuropilin 1                                                 |
| Gene_Symbol=NRP2 neuropilin 2 isoform 4 precursor                                         |
| Gene_Symbol=NTN4 Isoform 3 of Netrin-4 precursor                                          |
| Gene_Symbol=NUCB2 Nucleobindin-2 precursor                                                |
| Gene_Symbol=OLFM1 Isoform 1 of Noelin precursor                                           |
| Gene_Symbol=P4HB Protein disulfide-isomerase precursor                                    |
| Gene_Symbol=PAK1 Isoform 1 of Serine/threonine-protein kinase PAK 1                       |
| Gene_Symbol=PAM Isoform 1 of Peptidyl-glycine alpha-amidating monooxygenase precursor     |
| Gene_Symbol=PAM Isoform 3 of Peptidyl-glycine alpha-amidating monooxygenase precursor     |
| Gene_Symbol=PAPPA Pappalysin-1 precursor                                                  |
| Gene_Symbol=PCDH1 protocadherin 1 isoform 2 precursor                                     |
| Gene_Symbol=PCDH17 Isoform 1 of Protocadherin-17 precursor                                |
| Gene_Symbol=PCDH19 Isoform 1 of Protocadherin-19 precursor                                |
| Gene_Symbol=PCDH7 Isoform B of Protocadherin-7 precursor                                  |
| Gene_Symbol=PCDHB10 Protocadherin beta 10 precursor                                       |
| Gene_Symbol=PCDHB5 Protocadherin beta 5 precursor                                         |
| Gene_Symbol=PDCD6 Programmed cell death protein 6                                         |
| Gene_Symbol=PDGFD Isoform 2 of Platelet-derived growth factor D precursor                 |
| Gene_Symbol=PDLIM5 PDZ and LIM domain protein 5                                           |
| Gene_Symbol=PGRMC1 Membrane-associated progesterone receptor component 1                  |
| Gene_Symbol=PLAUR Isoform 1 of Urokinase plasminogen activator surface receptor precursor |
| Gene_Symbol=PLEC1 Isoform 1 of Plectin-1                                                  |
| Gene_Symbol=PLEC1 plectin 1 isoform 1                                                     |
| Gene_Symbol=PLEC1 plectin 1 isoform 10                                                    |
| Gene_Symbol=PLOD1 Procollagen-lysine,2-oxoglutarate 5-dioxygenase 1 precursor             |
| Gene_Symbol=PLXDC2 Isoform 1 of Plexin domain-containing protein 2 precursor              |
| Gene_Symbol=PLXNB2 similar to Plexin-B2 precursor                                         |

|                                                                                            |
|--------------------------------------------------------------------------------------------|
| Gene_Symbol=PNN Protein                                                                    |
| Gene_Symbol=PPIF Peptidyl-prolyl cis-trans isomerase, mitochondrial precursor              |
| Gene_Symbol=PPP2CA Serine/threonine-protein phosphatase 2A catalytic subunit alpha isoform |
| Gene_Symbol=PPP2R1A alpha isoform of regulatory subunit A, protein phosphatase 2           |
| Gene_Symbol=PPT1 Palmitoyl-protein thioesterase 1                                          |
| Gene_Symbol=PPT1 Palmitoyl-protein thioesterase 1 precursor                                |
| Gene_Symbol=PROCR Endothelial protein C receptor precursor                                 |
| Gene_Symbol=PROM1 Prominin-1 precursor                                                     |
| Gene_Symbol=PSAP Isoform Sap-mu-0 of Proactivator polypeptide precursor                    |
| Gene_Symbol=PSAP Isoform Sap-mu-9 of Proactivator polypeptide precursor                    |
| Gene_Symbol=PTGFRN Prostaglandin F2 receptor negative regulator precursor                  |
| Gene_Symbol=PTK7 PTK7 protein tyrosine kinase 7 isoform a variant (Fragment)               |
| Gene_Symbol=PTK7 Tyrosine-protein kinase-like 7 precursor                                  |
| Gene_Symbol=PTPRD protein tyrosine phosphatase, receptor type, D isoform 2 precursor       |
| Gene_Symbol=PTPRF protein tyrosine phosphatase, receptor type, F isoform 2 precursor       |
| Gene_Symbol=PTPRF Receptor-type tyrosine-protein phosphatase F precursor                   |
| Gene_Symbol=PTPRG Receptor-type tyrosine-protein phosphatase gamma precursor               |
| Gene_Symbol=PTPRK Receptor-type tyrosine-protein phosphatase kappa precursor               |
| Gene_Symbol=PTPRS protein tyrosine phosphatase, receptor type, sigma isoform 2 precursor   |
| Gene_Symbol=PTPRZ1 protein tyrosine phosphatase, receptor-type, zeta1 precursor            |
| Gene_Symbol=PTRF Isoform 1 of Polymerase I and transcript release factor                   |
| Gene_Symbol=PVR Isoform Beta of Poliovirus receptor precursor                              |
| Gene_Symbol=PVR Isoform Gamma of Poliovirus receptor precursor                             |
| Gene_Symbol=PVRL1 Isoform Delta of Poliovirus receptor-related protein 1 precursor         |
| Gene_Symbol=PVRL2 Isoform Alpha of Poliovirus receptor-related protein 2 precursor         |
| Gene_Symbol=QSCN6 Isoform 1 of Sulfhydryl oxidase 1 precursor                              |
| Gene_Symbol=QSCN6 Isoform 2 of Sulfhydryl oxidase 1 precursor                              |
| Gene_Symbol=QSCN6L1 78 kDa protein                                                         |
| Gene_Symbol=RAB11B Ras-related protein Rab-11B                                             |
| Gene_Symbol=RAB14 Ras-related protein Rab-14                                               |
| Gene_Symbol=RAP1A Ras-related protein Rap-1A precursor                                     |
| Gene_Symbol=RAP1B Ras-related protein Rap-1b precursor                                     |
| Gene_Symbol=RHOA Transforming protein RhoA precursor                                       |
| Gene_Symbol=RHOC Rho-related GTP-binding protein RhoC precursor                            |
| Gene_Symbol=RNPEP Aminopeptidase B                                                         |
| Gene_Symbol=ROBO1 ROBO1 protein                                                            |
| Gene_Symbol=RPSA;LOC388524 Ribosomal protein SA                                            |
| Gene_Symbol=RRBP1 Isoform 3 of Ribosome-binding protein 1                                  |
| Gene_Symbol=SCAMP3 Isoform 1 of Secretory carrier-associated membrane protein 3            |
| Gene_Symbol=SCARB1 Isoform 1 of Scavenger receptor class B member 1                        |
| Gene_Symbol=SCUBE1 Signal peptide, CUB and EGF-like domain-containing protein 1 precursor  |
| Gene_Symbol=SDC1 Syndecan-1 precursor                                                      |
| Gene_Symbol=SDC4 Syndecan-4 precursor                                                      |
| Gene_Symbol=SDCBP Syntenin-1                                                               |
| Gene_Symbol=SDF2 Stromal cell-derived factor 2 precursor                                   |
| Gene_Symbol=SDF2L1 Dihydropyrimidinase-like 2                                              |
| Gene_Symbol=SDPR Serum deprivation-response protein                                        |
| Gene_Symbol=SEC23B Protein transport protein Sec23B                                        |
| Gene_Symbol=SECTM1 Secreted and transmembrane protein 1 precursor                          |
| Gene_Symbol=SEMA3D Semaphorin-3D precursor                                                 |
| Gene_Symbol=SEMA3G Semaphorin-3G precursor                                                 |
| Gene_Symbol=SEMA4B semaphorin 4B precursor                                                 |



|                                                                                                                         |
|-------------------------------------------------------------------------------------------------------------------------|
| Gene_Symbol=SEMA4C Semaphorin-4C precursor                                                                              |
| Gene_Symbol=SEMA4D Semaphorin-4D precursor                                                                              |
| Gene_Symbol=SEMA7A Semaphorin-7A precursor                                                                              |
| Gene_Symbol=SGCE Isoform SGCE-1 of Epsilon-sarcoglycan precursor                                                        |
| Gene_Symbol=SHH Sonic hedgehog protein precursor                                                                        |
| Gene_Symbol=SLC1A5 Neutral amino acid transporter B                                                                     |
| Gene_Symbol=SLC25A13 Mitochondrial aspartate-glutamate carrier protein                                                  |
| Gene_Symbol=SLC2A1 Solute carrier family 2, facilitated glucose transporter member 1                                    |
| Gene_Symbol=SLC39A10 Solute carrier family 39 (Zinc transporter), member 10                                             |
| Gene_Symbol=SLC3A2 4F2 cell-surface antigen heavy chain                                                                 |
| Gene_Symbol=SLC3A2 solute carrier family 3 (activators of dibasic and neutral amino acid transport), member 2 isoform d |
| Gene_Symbol=SLC44A1 Isoform 1 of Choline transporter-like protein 1                                                     |
| Gene_Symbol=SLITRK6 Isoform 1 of SLIT and NTRK-like protein 6 precursor                                                 |
| Gene_Symbol=SMOC1 Isoform 1 of SPARC-related modular calcium-binding protein 1 precursor                                |
| Gene_Symbol=SMOC1 Isoform 2 of SPARC-related modular calcium-binding protein 1 precursor                                |
| Gene_Symbol=SORL1 Sortilin-related receptor precursor                                                                   |
| Gene_Symbol=SORT1 Sortilin precursor                                                                                    |
| Gene_Symbol=SPINT1 Isoform 1 of Kunitz-type protease inhibitor 1 precursor                                              |
| Gene_Symbol=SPINT1 Isoform 2 of Kunitz-type protease inhibitor 1 precursor                                              |
| Gene_Symbol=SPTAN1 Isoform 1 of Spectrin alpha chain, brain                                                             |
| Gene_Symbol=SPTAN1 Isoform 2 of Spectrin alpha chain, brain                                                             |
| Gene_Symbol=SPTAN1 Isoform 3 of Spectrin alpha chain, brain                                                             |
| Gene_Symbol=SPTBN1 Isoform Long of Spectrin beta chain, brain 1                                                         |
| Gene_Symbol=SRPX Isoform 1 of Sushi repeat-containing protein SRPX precursor                                            |
| Gene_Symbol=ST14 Suppressor of tumorigenicity protein 14                                                                |
| Gene_Symbol=ST3GAL1 CMP-N-acetylneuraminic-acid-beta-galactosyltransferase                                              |
| Gene_Symbol=ST8SIA4 CMP-N-acetylneuraminic-acid-poly-alpha-2,8-sialyltransferase                                        |
| Gene_Symbol=SWAP70 Switch-associated protein 70                                                                         |
| Gene_Symbol=SYNE2 Isoform 1 of Nesprin-2                                                                                |
| Gene_Symbol=TACSTD1 Tumor-associated calcium signal transducer 1 precursor                                              |
| Gene_Symbol=TAGLN2;CCDC19 24 kDa protein                                                                                |
| Gene_Symbol=TAGLN2;CCDC19 Transgelin-2                                                                                  |
| Gene_Symbol=TFRC Transferrin receptor protein 1                                                                         |
| Gene_Symbol=TGFBR3 transforming growth factor, beta receptor III                                                        |
| Gene_Symbol=TIMP2 22 kDa protein                                                                                        |
| Gene_Symbol=TIMP2 Metalloproteinase inhibitor 2 precursor                                                               |
| Gene_Symbol=TLN1 271 kDa protein                                                                                        |
| Gene_Symbol=TLN1 Talin-1                                                                                                |
| Gene_Symbol=TMEM4 Isoform 1 of MIR-interacting saposin-like protein precursor                                           |
| Gene_Symbol=TMPO Isoform Beta of Lamina-associated polypeptide 2, isoforms beta/gamma                                   |
| Gene_Symbol=TNFRSF19L Tumor necrosis factor receptor superfamily member 19L precursor                                   |
| Gene_Symbol=TNFRSF1A Tumor necrosis factor receptor superfamily member 1A precursor                                     |
| Gene_Symbol=TSPAN5 Tetraspanin-5                                                                                        |
| Gene_Symbol=TWF2 Twinfilin-2                                                                                            |
| Gene_Symbol=UXS1 Isoform 2 of UDP-glucuronic acid decarboxylase 1                                                       |
| Gene_Symbol=VAPA 14 kDa protein                                                                                         |
| Gene_Symbol=VAPA Vesicle-associated membrane protein-associated protein A                                               |
| Gene_Symbol=VASN Vasorin precursor                                                                                      |
| Gene_Symbol=VAT1 Synaptic vesicle membrane protein VAT-1 homolog                                                        |
| Gene_Symbol=VCL Isoform 1 of Vinculin                                                                                   |
| Gene_Symbol=VCL Isoform 2 of Vinculin                                                                                   |
| Gene_Symbol=VEGFC Vascular endothelial growth factor C precursor                                                        |



|                                                                               |
|-------------------------------------------------------------------------------|
| Gene_Symbol=VIL2 Ezrin                                                        |
| Gene_Symbol=VPS29 Isoform 1 of Vacuolar protein sorting-associated protein 29 |
| Gene_Symbol=VPS35 Vacuolar protein sorting-associated protein 35              |
| Gene_Symbol=WISP2 WNT1-inducible-signaling pathway protein 2 precursor        |
| Gene_Symbol=XRCC6 70 kDa protein                                              |
| Gene_Symbol=XYLT1 Xylosyltransferase 1                                        |
| Gene_Symbol=XYLT2 Isoform 1 of Xylosyltransferase 2                           |

## lung cancer cell lines H520, H23, H460 and H1688 from Mascot and X! Ta

| Number of similar matches | Accession numbers                               | Protein molecular weight (AMU) |
|---------------------------|-------------------------------------------------|--------------------------------|
| 2                         | IPI00020513,IPI00797866                         | 67266                          |
| 1                         | IPI00009315                                     | 60574.7                        |
| 1                         | IPI00437751                                     | 149700.9                       |
| 1                         | IPI00013897                                     | 84125                          |
| 1                         | IPI00420069                                     | 90365.2                        |
| 1                         | IPI00420067                                     | 90302                          |
| 1                         | IPI00288894                                     | 93003.9                        |
| 2                         | IPI00029606,IPI00288894                         | 78525.4                        |
| 2                         | IPI00011901,IPI00249735                         | 105020.9                       |
| 1                         | IPI00021903                                     | 91908.2                        |
| 2                         | IPI00440932,IPI00747759                         | 90538.1                        |
| 1                         | IPI00651738                                     | 21481.2                        |
| 2                         | IPI00033030,IPI00470921                         | 42136.2                        |
| 1                         | IPI00010460                                     | 37646.6                        |
| 1                         | IPI00220271                                     | 36555.6                        |
| 4                         | IPI00015102,IPI00783803,IPI00795504,IPI00807403 | 65085.8                        |
| 2                         | IPI00333619,IPI00394758                         | 54831.8                        |
| 1                         | IPI00022426                                     | 38981.6                        |
| 1                         | IPI00030431                                     | 62772.6                        |
| 1                         | IPI00218918                                     | 38697.9                        |
| 2                         | IPI00418169,IPI00455315                         | 40395.3                        |
| 2                         | IPI00020012,IPI00796118                         | 72158                          |
| 2                         | IPI00031030,IPI00220978                         | 86937                          |
| 4                         | IPI00006608,IPI00219187,IPI00412681,IPI00412924 | 86923.3                        |
| 1                         | IPI00514053                                     | 57193.2                        |
| 1                         | IPI00215914                                     | 20679.6                        |
| 2                         | IPI00329685,IPI00744184                         | 53789.5                        |
| 2                         | IPI00165949,IPI00477831                         | 107826.4                       |
| 1                         | IPI00006482                                     | 112881.5                       |
| 4                         | IPI00003021,IPI00302840,IPI00640401,IPI00788782 | 112250.7                       |
| 1                         | IPI00008167                                     | 31495.7                        |
| 1                         | IPI00440493                                     | 59734.1                        |
| 2                         | IPI00002521,IPI00456008                         | 12569.9                        |
| 3                         | IPI00020430,IPI00784119,IPI00794988             | 52592.9                        |
| 2                         | IPI00168884,IPI00828107                         | 26615.3                        |
| 1                         | IPI00168884                                     | 38991.1                        |
| 1                         | IPI00007682                                     | 68287.4                        |
| 1                         | IPI00007812                                     | 56484.1                        |
| 2                         | IPI00027235,IPI00478671                         | 158518.3                       |
| 2                         | IPI00296992,IPI00397361                         | 98317.2                        |
| 1                         | IPI00166729                                     | 34240.6                        |
| 2                         | IPI00004656,IPI00796379                         | 13696.9                        |
| 1                         | IPI00064848                                     | 37120.7                        |
| 1                         | IPI00009997                                     | 47101.4                        |

|    |                                                             |          |
|----|-------------------------------------------------------------|----------|
| 1  | IPI00217345                                                 | 45467.9  |
| 1  | IPI00215767                                                 | 43903    |
| 1  | IPI00759755                                                 | 42520.2  |
| 1  | IPI00030128                                                 | 40023.9  |
| 1  | IPI00299024                                                 | 22675.3  |
| 2  | IPI00413587,IPI00420084                                     | 21977.3  |
| 1  | IPI00795150                                                 | 46382.3  |
| 3  | IPI00019906,IPI00218019,IPI00795150                         | 29203.1  |
| 2  | IPI00026240,IPI00657860                                     | 35707.3  |
| 1  | IPI00014230                                                 | 31344.6  |
| 2  | IPI00295519,IPI00607570                                     | 64535.4  |
| 2  | IPI00003813,IPI00166392                                     | 48491.3  |
| 3  | IPI00075248,IPI00386621,IPI00794543                         | 16820    |
| 1  | IPI00103175                                                 | 44822.1  |
| 1  | IPI00020984                                                 | 67552.2  |
| 1  | IPI00008274                                                 | 51837.5  |
| 1  | IPI00011285                                                 | 81874.6  |
| 1  | IPI00009308                                                 | 11007.3  |
| 1  | IPI00152540                                                 | 161674.2 |
| 1  | IPI00029260                                                 | 40058.6  |
| 4  | IPI00410488,IPI00441094,IPI00719044,IPI00793688             | 57216.1  |
| 14 | IPI00297160,IPI00305064,IPI00418465,IPI00419219,IPI00793688 | 39398.2  |
| 8  | IPI00305064,IPI00418465,IPI00827555,IPI00827650,IPI00793688 | 76609.9  |
| 12 | IPI00305064,IPI00418465,IPI00419219,IPI00827555,IPI00793688 | 81535.4  |
| 5  | IPI00219853,IPI00374176,IPI00374177,IPI00398353,IPI00793688 | 41745.7  |
| 1  | IPI00216550                                                 | 48699.2  |
| 1  | IPI00031713                                                 | 21100.3  |
| 1  | IPI00000190                                                 | 25791.8  |
| 3  | IPI00215997,IPI00657796,IPI00795937                         | 25399    |
| 1  | IPI00007189                                                 | 21292.7  |
| 1  | IPI00025861                                                 | 97439.6  |
| 1  | IPI00295399                                                 | 88436.3  |
| 1  | IPI00293539                                                 | 76523.6  |
| 1  | IPI00024046                                                 | 78269.6  |
| 1  | IPI00290089                                                 | 92132.4  |
| 1  | IPI00290085                                                 | 99793.8  |
| 3  | IPI00216677,IPI00645614,IPI00747243                         | 91410.1  |
| 2  | IPI00645614,IPI00747243                                     | 86534.7  |
| 1  | IPI00027486                                                 | 76777.9  |
| 1  | IPI00783390                                                 | 135011.5 |
| 1  | IPI00299059                                                 | 136638.3 |
| 1  | IPI00465319                                                 | 85478.2  |
| 1  | IPI00099831                                                 | 41537.6  |
| 1  | IPI00010896                                                 | 26905.3  |
| 1  | IPI00007257                                                 | 108623.5 |
| 1  | IPI00413959                                                 | 109773.6 |
| 1  | IPI00005491                                                 | 107001.7 |
| 2  | IPI00396423,IPI00747063                                     | 107015.6 |
| 1  | IPI00747063                                                 | 106080.2 |
| 1  | IPI00015262                                                 | 33679.6  |
| 1  | IPI00029751                                                 | 113304.8 |
| 1  | IPI00306322                                                 | 167521.7 |

|   |                                                     |          |
|---|-----------------------------------------------------|----------|
| 1 | IPI00472200                                         | 163616.6 |
| 1 | IPI00027078                                         | 152915.4 |
| 1 | IPI00031121                                         | 63657.9  |
| 1 | IPI00009294                                         | 113716.8 |
| 1 | IPI00015881                                         | 60101.4  |
| 1 | IPI00020977                                         | 38072.7  |
| 1 | IPI00017292                                         | 85479    |
| 1 | IPI00787237                                         | 77188.8  |
| 3 | IPI00034319,IPI00554556,IPI00554634                 | 19098.1  |
| 1 | IPI00013874                                         | 11283.7  |
| 1 | IPI00044326                                         | 42980    |
| 1 | IPI00028911                                         | 97563.3  |
| 3 | IPI00001477,IPI00219996,IPI00657861                 | 101111.7 |
| 1 | IPI00016353                                         | 28653.1  |
| 7 | IPI00030351,IPI00218729,IPI00552213,IPI00552376,IPI | 100338.4 |
| 1 | IPI00012535                                         | 44850.6  |
| 1 | IPI00032406                                         | 45727.7  |
| 2 | IPI00333140,IPI00783545                             | 78455.9  |
| 4 | IPI00146935,IPI00235412,IPI00473085,IPI00555883     | 78084    |
| 2 | IPI00025846,IPI00220146                             | 99944.6  |
| 1 | IPI00028931                                         | 122276.4 |
| 1 | IPI00013933                                         | 331763.4 |
| 1 | IPI00745955                                         | 40667.4  |
| 1 | IPI00025840                                         | 23769.2  |
| 1 | IPI00005517                                         | 26279.4  |
| 1 | IPI00024307                                         | 37989.4  |
| 1 | IPI00028381                                         | 40527.6  |
| 2 | IPI00156171,IPI00303210                             | 98987.4  |
| 5 | IPI00025295,IPI00478478,IPI00514953,IPI00639929,IPI | 53230.1  |
| 1 | IPI00032230                                         | 120661.8 |
| 1 | IPI00008318                                         | 109842.6 |
| 2 | IPI00008290,IPI00215945                             | 114767   |
| 1 | IPI00009896                                         | 52933.1  |
| 1 | IPI00293128                                         | 86239.4  |
| 2 | IPI00002732,IPI00790204                             | 37563.9  |
| 3 | IPI00001754,IPI00069985,IPI00294993                 | 32565.1  |
| 1 | IPI00031411                                         | 506925.3 |
| 2 | IPI00328113,IPI00784458                             | 312283   |
| 2 | IPI00019439,IPI00784315                             | 314744.5 |
| 5 | IPI00021048,IPI00216269,IPI00645867,IPI00790914,IPI | 234697.6 |
| 1 | IPI00021399                                         | 26246.4  |
| 1 | IPI00328245                                         | 91563.3  |
| 1 | IPI00296561                                         | 54518.7  |
| 6 | IPI00289334,IPI00382696,IPI00382697,IPI00382700,IPI | 278171.9 |
| 1 | IPI00783128                                         | 288938.8 |
| 1 | IPI00329327                                         | 443604   |
| 1 | IPI00180707                                         | 351136.8 |
| 1 | IPI00018387                                         | 86658.7  |
| 1 | IPI00183321                                         | 64910.4  |
| 1 | IPI00375205                                         | 68975.1  |
| 1 | IPI00004669                                         | 64715.1  |
| 1 | IPI00005401                                         | 106250.2 |

|    |                                                     |          |
|----|-----------------------------------------------------|----------|
| 1  | IPI00026991                                         | 71141.3  |
| 1  | IPI00328391                                         | 75372.6  |
| 1  | IPI00166613                                         | 63057.4  |
| 2  | IPI00021807,IPI00759616                             | 59699.7  |
| 1  | IPI00640006                                         | 45603.5  |
| 1  | IPI00031461                                         | 50647.5  |
| 1  | IPI00024705                                         | 36032.6  |
| 2  | IPI00414717,IPI00641153                             | 137205.8 |
| 3  | IPI00171411,IPI00759659,IPI00784293                 | 46254.7  |
| 2  | IPI00759659,IPI00784293                             | 44254.2  |
| 1  | IPI00743931                                         | 47128.2  |
| 2  | IPI00031241,IPI00743931                             | 39750.8  |
| 1  | IPI00015688                                         | 61633.3  |
| 1  | IPI00232571                                         | 62394.5  |
| 1  | IPI00001755                                         | 62718.3  |
| 4  | IPI00030910,IPI00150961,IPI00639921,IPI00783872     | 72731.8  |
| 2  | IPI00150961,IPI00783872                             | 78346.4  |
| 1  | IPI00651640                                         | 133685.8 |
| 5  | IPI00217481,IPI00423340,IPI00423342,IPI00651640,IPI | 139915.9 |
| 1  | IPI00006166                                         | 67097.6  |
| 3  | IPI00397949,IPI00412420,IPI00783104                 | 77055.6  |
| 1  | IPI00022228                                         | 141424.1 |
| 2  | IPI00027851,IPI00829779                             | 60671.8  |
| 1  | IPI00012585                                         | 63095.3  |
| 1  | IPI00018246                                         | 102470.4 |
| 1  | IPI00644631                                         | 40903.2  |
| 1  | IPI00742968                                         | 40670.1  |
| 1  | IPI00472882                                         | 40890.2  |
| 1  | IPI00760554                                         | 40958.2  |
| 1  | IPI00472736                                         | 40773.7  |
| 2  | IPI00472112,IPI00472448                             | 41446.2  |
| 11 | IPI00471955,IPI00472284,IPI00472456,IPI00646083,IPI | 40523.2  |
| 1  | IPI00472284                                         | 40460    |
| 3  | IPI00472138,IPI00655604,IPI00747198                 | 40318.8  |
| 2  | IPI00471951,IPI00816057                             | 40844.3  |
| 1  | IPI00472605                                         | 41076.3  |
| 1  | IPI00651697                                         | 40842.3  |
| 1  | IPI00473131                                         | 40950.3  |
| 2  | IPI00472035,IPI00745649                             | 36779.5  |
| 1  | IPI00789627                                         | 44137.6  |
| 1  | IPI00004672                                         | 41218    |
| 2  | IPI00171903,IPI00383296                             | 77499.3  |
| 1  | IPI00383296                                         | 73604.5  |
| 3  | IPI00157454,IPI00160316,IPI00395692                 | 69112.8  |
| 1  | IPI00003362                                         | 72405.6  |
| 1  | IPI00003865                                         | 70881.8  |
| 1  | IPI00788958                                         | 73617.2  |
| 1  | IPI00007765                                         | 73663.3  |
| 1  | IPI00025512                                         | 22764.6  |
| 1  | IPI00024284                                         | 468787.5 |
| 1  | IPI00008494                                         | 57806.5  |
| 1  | IPI00290456                                         | 97310.9  |

|   |                                                 |          |
|---|-------------------------------------------------|----------|
| 1 | IPI00790218                                     | 51905.7  |
| 1 | IPI00289819                                     | 274255.5 |
| 1 | IPI00056478                                     | 65014.8  |
| 2 | IPI00020354,IPI00647552                         | 48742    |
| 1 | IPI00021382                                     | 45403.8  |
| 1 | IPI00297124                                     | 103504.9 |
| 2 | IPI00009960,IPI00554469                         | 83661    |
| 1 | IPI00009342                                     | 189240.6 |
| 1 | IPI00031821                                     | 30321.1  |
| 1 | IPI00099650                                     | 133778   |
| 1 | IPI00060715                                     | 35683.8  |
| 4 | IPI00008575,IPI00082310,IPI00385834,IPI00479209 | 48210.2  |
| 1 | IPI00082310                                     | 44010    |
| 1 | IPI00022296                                     | 109848.7 |
| 1 | IPI00220142                                     | 27850.1  |
| 3 | IPI00140177,IPI00218929,IPI00651704             | 51880.7  |
| 1 | IPI00328753                                     | 156258.3 |
| 3 | IPI00027087,IPI00334532,IPI00646281             | 139985.2 |
| 1 | IPI00375294                                     | 337133.7 |
| 1 | IPI00783665                                     | 399725.1 |
| 1 | IPI00013976                                     | 198045.3 |
| 1 | IPI00296922                                     | 196057.1 |
| 1 | IPI00298281                                     | 177587.1 |
| 1 | IPI00010471                                     | 70274.1  |
| 1 | IPI00792252                                     | 66389    |
| 2 | IPI00000070,IPI00792252                         | 95356.7  |
| 1 | IPI00032491                                     | 99981.4  |
| 1 | IPI00455739                                     | 41756.2  |
| 1 | IPI00465431                                     | 26170.8  |
| 1 | IPI00023673                                     | 65314.1  |
| 1 | IPI00026530                                     | 57531.2  |
| 1 | IPI00009950                                     | 40211.5  |
| 1 | IPI00377047                                     | 50096.1  |
| 2 | IPI00294839,IPI00782994                         | 87000.3  |
| 1 | IPI00782994                                     | 86705.1  |
| 2 | IPI00183445,IPI00410210                         | 162701   |
| 1 | IPI00045841                                     | 53293.8  |
| 1 | IPI00024292                                     | 521897.7 |
| 1 | IPI00005774                                     | 105658.4 |
| 1 | IPI00396321                                     | 34913.4  |
| 1 | IPI00328716                                     | 58623.5  |
| 3 | IPI00409640,IPI00409641,IPI00641640             | 71420.9  |
| 4 | IPI00328218,IPI00409640,IPI00409641,IPI00641640 | 65569.2  |
| 1 | IPI00303882                                     | 47027.6  |
| 1 | IPI00009145                                     | 72988.9  |
| 1 | IPI00008207                                     | 79563.9  |
| 1 | IPI00219301                                     | 31536.2  |
| 1 | IPI00641181                                     | 19510.6  |
| 1 | IPI00016334                                     | 71588.5  |
| 3 | IPI00029273,IPI00294528,IPI00792387             | 155511.2 |
| 2 | IPI00002236,IPI00334005                         | 43104.9  |
| 1 | IPI00025809                                     | 51533.1  |

|    |                                                     |          |
|----|-----------------------------------------------------|----------|
| 1  | IPI00020407                                         | 84526.8  |
| 5  | IPI00374065,IPI00455473,IPI00739902,IPI00740837,IPI | 213687.7 |
| 2  | IPI00640150,IPI00647961                             | 42527.4  |
| 6  | IPI00023461,IPI00216505,IPI00398718,IPI00479469,IPI | 206790.4 |
| 1  | IPI00005707                                         | 166637.4 |
| 1  | IPI00219365                                         | 67803.8  |
| 11 | IPI00013955,IPI00218163,IPI00218164,IPI00218165,IPI | 122050.5 |
| 1  | IPI00011448                                         | 54586.6  |
| 1  | IPI00019502                                         | 226519.5 |
| 1  | IPI00293817                                         | 34728.9  |
| 1  | IPI00555628                                         | 89159.4  |
| 2  | IPI00435020,IPI00795918                             | 93343    |
| 3  | IPI00023814,IPI00217291,IPI00472011                 | 159999.1 |
| 1  | IPI00217291                                         | 154286.8 |
| 7  | IPI00384998,IPI00470575,IPI00513695,IPI00513705,IPI | 139864.5 |
| 1  | IPI00026944                                         | 136433.8 |
| 1  | IPI00028908                                         | 151376.5 |
| 1  | IPI00337541                                         | 113881.2 |
| 1  | IPI00329352                                         | 134335.7 |
| 1  | IPI00297655                                         | 265376.1 |
| 1  | IPI00029819                                         | 243632   |
| 4  | IPI00333776,IPI00333777,IPI00333778,IPI00655818     | 144057.7 |
| 1  | IPI00333778                                         | 130836.5 |
| 1  | IPI00783655                                         | 131702.5 |
| 2  | IPI00299594,IPI00398715                             | 103104.6 |
| 7  | IPI00165438,IPI00299594,IPI00398715,IPI00549340,IPI | 72049.8  |
| 2  | IPI00300890,IPI00641131                             | 101968.9 |
| 1  | IPI00385236                                         | 66333    |
| 1  | IPI00009123                                         | 50206.3  |
| 4  | IPI00017841,IPI00419820,IPI00472517,IPI00550145     | 55383.3  |
| 1  | IPI00010796                                         | 57100.1  |
| 1  | IPI00656138                                         | 60630.3  |
| 5  | IPI00177543,IPI00219041,IPI00219042,IPI00219043,IPI | 108498.8 |
| 1  | IPI00219042                                         | 100800.4 |
| 2  | IPI00001869,IPI00513756                             | 181119.7 |
| 2  | IPI00176458,IPI00215992                             | 133705.3 |
| 1  | IPI00645206                                         | 126212.6 |
| 1  | IPI00552819                                         | 126236   |
| 1  | IPI00215946                                         | 116446.3 |
| 1  | IPI00009034                                         | 87604.2  |
| 1  | IPI00001428                                         | 86405.8  |
| 1  | IPI00025277                                         | 21851.1  |
| 2  | IPI00011865,IPI00018822                             | 42149.4  |
| 1  | IPI00007935                                         | 63953    |
| 1  | IPI00220739                                         | 21654.2  |
| 2  | IPI00010676,IPI00215706                             | 36959.2  |
| 3  | IPI00014898,IPI00186711,IPI00398002                 | 531707.9 |
| 1  | IPI00398002                                         | 518449.3 |
| 1  | IPI00398778                                         | 516455.6 |
| 1  | IPI00027192                                         | 83534.5  |
| 3  | IPI00044369,IPI00073777,IPI00640599                 | 59565    |
| 2  | IPI00398435,IPI00736693                             | 211835.7 |



|   |                                     |          |
|---|-------------------------------------|----------|
| 1 | IPI00418458                         | 83907.7  |
| 1 | IPI00026519                         | 22022.4  |
| 2 | IPI00008380,IPI00815784             | 35576.5  |
| 2 | IPI00419307,IPI00554737             | 65291.7  |
| 1 | IPI00514424                         | 37114.4  |
| 1 | IPI00002412                         | 34176    |
| 1 | IPI00009276                         | 30697.3  |
| 1 | IPI00012540                         | 97188.4  |
| 2 | IPI00012503,IPI00219825             | 58094    |
| 1 | IPI00744835                         | 58465.3  |
| 1 | IPI00022048                         | 98537.6  |
| 1 | IPI00555762                         | 84345.8  |
| 1 | IPI00298292                         | 118373.6 |
| 1 | IPI00375547                         | 213303.8 |
| 1 | IPI00465186                         | 211667.8 |
| 2 | IPI00107831,IPI00642154             | 211825.8 |
| 1 | IPI00011651                         | 162041.5 |
| 3 | IPI00015756,IPI00470937,IPI00644648 | 162071.2 |
| 1 | IPI00743517                         | 212466.3 |
| 1 | IPI00748312                         | 254569.4 |
| 2 | IPI00176903,IPI00513773             | 43458.5  |
| 1 | IPI00219425                         | 40105.9  |
| 1 | IPI00219426                         | 39285.1  |
| 1 | IPI00003648                         | 57140    |
| 1 | IPI00215980                         | 51340.8  |
| 1 | IPI00003590                         | 82560.7  |
| 1 | IPI00465016                         | 66843.3  |
| 3 | IPI00376394,IPI00479085,IPI00783371 | 77739.3  |
| 1 | IPI00020436                         | 24471    |
| 1 | IPI00291928                         | 23879.6  |
| 2 | IPI00019345,IPI00640287             | 20969.3  |
| 1 | IPI00015148                         | 20806.9  |
| 2 | IPI00027500,IPI00478231             | 21750.4  |
| 2 | IPI00027434,IPI00647268             | 21988.7  |
| 1 | IPI00642211                         | 73481.6  |
| 1 | IPI00829739                         | 169635.2 |
| 2 | IPI00413108,IPI00553164             | 33295.5  |
| 1 | IPI00215743                         | 152695.7 |
| 3 | IPI00306382,IPI00453116,IPI00479205 | 38301.6  |
| 3 | IPI00177968,IPI00291007,IPI00447020 | 56956.6  |
| 2 | IPI00217435,IPI00747808             | 107801.9 |
| 1 | IPI00002441                         | 32458.3  |
| 1 | IPI00011564                         | 21624.1  |
| 3 | IPI00299086,IPI00479018,IPI00794699 | 32427.3  |
| 1 | IPI00293167                         | 23007    |
| 1 | IPI00106642                         | 66998.8  |
| 1 | IPI00005809                         | 47154.9  |
| 1 | IPI00017376                         | 86463.1  |
| 1 | IPI00170635                         | 27020.6  |
| 2 | IPI00028213,IPI00783087             | 89636.9  |
| 1 | IPI00024570                         | 86682.2  |
| 1 | IPI00419724                         | 92748.7  |

|   |                                                     |          |
|---|-----------------------------------------------------|----------|
| 1 | IPI00073763                                         | 92605.3  |
| 1 | IPI00023807                                         | 96132.9  |
| 1 | IPI00025257                                         | 74805.7  |
| 2 | IPI00414984,IPI00418183                             | 52629.2  |
| 1 | IPI00017480                                         | 49907.6  |
| 1 | IPI00019472                                         | 56581.8  |
| 1 | IPI00007084                                         | 74287.3  |
| 1 | IPI00220194                                         | 54067.3  |
| 1 | IPI00008085                                         | 94114.2  |
| 6 | IPI00027493,IPI00554481,IPI00554611,IPI00554702,IPI | 57929.4  |
| 2 | IPI00554702,IPI00604710                             | 64856.9  |
| 1 | IPI00221393                                         | 73286.6  |
| 1 | IPI00176398                                         | 95096.1  |
| 1 | IPI00301812                                         | 48144.5  |
| 1 | IPI00412898                                         | 48243.6  |
| 1 | IPI00022608                                         | 248423.6 |
| 1 | IPI00217882                                         | 92051.6  |
| 1 | IPI00376403                                         | 58379.3  |
| 2 | IPI00011643,IPI00376403                             | 56866.7  |
| 3 | IPI00478292,IPI00744706,IPI00745092                 | 285466.8 |
| 1 | IPI00745092                                         | 285998.5 |
| 1 | IPI00744706                                         | 283209.2 |
| 1 | IPI00005614                                         | 274595.4 |
| 1 | IPI00289795                                         | 51554.9  |
| 1 | IPI00001922                                         | 94751.1  |
| 1 | IPI00009629                                         | 39057.7  |
| 1 | IPI00020201                                         | 41278.3  |
| 1 | IPI00307200                                         | 68981.3  |
| 2 | IPI00239405,IPI00239406                             | 796435.7 |
| 1 | IPI00296215                                         | 34902.2  |
| 1 | IPI00647915                                         | 24436.4  |
| 3 | IPI00550363,IPI00644531,IPI00647915                 | 22373.9  |
| 1 | IPI00022462                                         | 84855.6  |
| 1 | IPI00304865                                         | 93482.2  |
| 1 | IPI00788747                                         | 21647.9  |
| 3 | IPI00027166,IPI00787781,IPI00788747                 | 24381.9  |
| 2 | IPI00298994,IPI00784273                             | 271152.8 |
| 1 | IPI00784273                                         | 269747.1 |
| 1 | IPI00443909                                         | 20634.5  |
| 1 | IPI00030131                                         | 50653.4  |
| 1 | IPI00064377                                         | 46073.3  |
| 2 | IPI00018880,IPI00796532                             | 50477.4  |
| 1 | IPI00030914                                         | 30320.2  |
| 1 | IPI00550917                                         | 39530.8  |
| 2 | IPI00410544,IPI00657807                             | 48134.3  |
| 1 | IPI00642826                                         | 13741.8  |
| 1 | IPI00170692                                         | 27875.9  |
| 2 | IPI00395488,IPI00745461                             | 71696.1  |
| 1 | IPI00156689                                         | 41901.8  |
| 2 | IPI00291175,IPI00307162                             | 116706.3 |
| 1 | IPI00307162                                         | 123783.3 |
| 1 | IPI00028076                                         | 46995.8  |

|   |                                     |         |
|---|-------------------------------------|---------|
| 1 | IPI00746388                         | 69671.9 |
| 3 | IPI00170796,IPI00184284,IPI00798102 | 20488.1 |
| 1 | IPI00018931                         | 91692   |
| 1 | IPI00022052                         | 26806   |
| 2 | IPI00465430,IPI00644712             | 69855.4 |
| 1 | IPI00183487                         | 107553  |
| 1 | IPI00432723                         | 96750   |

## ndem searching

| IPI                                             |
|-------------------------------------------------|
| IPI00020513,IPI00797866                         |
| IPI00009315                                     |
| IPI00437751                                     |
| IPI00013897                                     |
| IPI00420069                                     |
| IPI00420067                                     |
| IPI00288894                                     |
| IPI00029606,IPI00288894                         |
| IPI00011901,IPI00249735                         |
| IPI00021903                                     |
| IPI00440932,IPI00747759                         |
| IPI00651738                                     |
| IPI00033030,IPI00470921                         |
| IPI00010460                                     |
| IPI00220271                                     |
| IPI00015102,IPI00783803,IPI00795504,IPI00807403 |
| IPI00333619,IPI00394758                         |
| IPI00022426                                     |
| IPI00030431                                     |
| IPI00218918                                     |
| IPI00418169,IPI00455315                         |
| IPI00020012,IPI00796118                         |
| IPI00031030,IPI00220978                         |
| IPI00006608,IPI00219187,IPI00412681,IPI00412924 |
| IPI00514053                                     |
| IPI00215914                                     |
| IPI00329685,IPI00744184                         |
| IPI00165949,IPI00477831                         |
| IPI00006482                                     |
| IPI00003021,IPI00302840,IPI00640401,IPI00788782 |
| IPI00008167                                     |
| IPI00440493                                     |
| IPI00002521,IPI00456008                         |
| IPI00020430,IPI00784119,IPI00794988             |
| IPI00168884,IPI00828107                         |
| IPI00168884                                     |
| IPI00007682                                     |
| IPI00007812                                     |
| IPI00027235,IPI00478671                         |
| IPI00296992,IPI00397361                         |
| IPI00166729                                     |
| IPI00004656,IPI00796379                         |
| IPI00064848                                     |
| IPI00009997                                     |

|                                                              |
|--------------------------------------------------------------|
| IPI00217345                                                  |
| IPI00215767                                                  |
| IPI00759755                                                  |
| IPI00030128                                                  |
| IPI00299024                                                  |
| IPI00413587,IPI00420084                                      |
| IPI00795150                                                  |
| IPI00019906,IPI00218019,IPI00795150                          |
| IPI00026240,IPI00657860                                      |
| IPI00014230                                                  |
| IPI00295519,IPI00607570                                      |
| IPI00003813,IPI00166392                                      |
| IPI00075248,IPI00386621,IPI00794543                          |
| IPI00103175                                                  |
| IPI00020984                                                  |
| IPI00008274                                                  |
| IPI00011285                                                  |
| IPI00009308                                                  |
| IPI00152540                                                  |
| IPI00029260                                                  |
| IPI00410488,IPI00441094,IPI00719044,IPI00793688              |
| IPI00297160,IPI00305064,IPI00418465,IPI00419219,IPI00827650, |
| IPI00305064,IPI00418465,IPI00827555,IPI00827650,IPI00827658, |
| IPI00305064,IPI00418465,IPI00419219,IPI00827555,IPI00827650, |
| IPI00219853,IPI00374176,IPI00374177,IPI00398353,IPI00456644  |
| IPI00216550                                                  |
| IPI00031713                                                  |
| IPI00000190                                                  |
| IPI00215997,IPI00657796,IPI00795937                          |
| IPI00007189                                                  |
| IPI00025861                                                  |
| IPI00295399                                                  |
| IPI00293539                                                  |
| IPI00024046                                                  |
| IPI00290089                                                  |
| IPI00290085                                                  |
| IPI00216677,IPI00645614,IPI00747243                          |
| IPI00645614,IPI00747243                                      |
| IPI00027486                                                  |
| IPI00783390                                                  |
| IPI00299059                                                  |
| IPI00465319                                                  |
| IPI00099831                                                  |
| IPI00010896                                                  |
| IPI00007257                                                  |
| IPI00413959                                                  |
| IPI00005491                                                  |
| IPI00396423,IPI00747063                                      |
| IPI00747063                                                  |
| IPI00015262                                                  |
| IPI00029751                                                  |
| IPI00306322                                                  |

|                                                              |
|--------------------------------------------------------------|
| IPI00472200                                                  |
| IPI00027078                                                  |
| IPI00031121                                                  |
| IPI00009294                                                  |
| IPI00015881                                                  |
| IPI00020977                                                  |
| IPI00017292                                                  |
| IPI00787237                                                  |
| IPI00034319,IPI00554556,IPI00554634                          |
| IPI00013874                                                  |
| IPI00044326                                                  |
| IPI00028911                                                  |
| IPI00001477,IPI00219996,IPI00657861                          |
| IPI00016353                                                  |
| IPI00030351,IPI00218729,IPI00552213,IPI00552376,IPI00552511, |
| IPI00012535                                                  |
| IPI00032406                                                  |
| IPI00333140,IPI00783545                                      |
| IPI00146935,IPI00235412,IPI00473085,IPI00555883              |
| IPI00025846,IPI00220146                                      |
| IPI00028931                                                  |
| IPI00013933                                                  |
| IPI00745955                                                  |
| IPI00025840                                                  |
| IPI00005517                                                  |
| IPI00024307                                                  |
| IPI00028381                                                  |
| IPI00156171,IPI00303210                                      |
| IPI00025295,IPI00478478,IPI00514953,IPI00639929,IPI00643738  |
| IPI00032230                                                  |
| IPI00008318                                                  |
| IPI00008290,IPI00215945                                      |
| IPI00009896                                                  |
| IPI00293128                                                  |
| IPI00002732,IPI00790204                                      |
| IPI00001754,IPI00069985,IPI00294993                          |
| IPI00031411                                                  |
| IPI00328113,IPI00784458                                      |
| IPI00019439,IPI00784315                                      |
| IPI00021048,IPI00216269,IPI00645867,IPI00790914,IPI00827894  |
| IPI00021399                                                  |
| IPI00328245                                                  |
| IPI00296561                                                  |
| IPI00289334,IPI00382696,IPI00382697,IPI00382700,IPI00477536, |
| IPI00783128                                                  |
| IPI00329327                                                  |
| IPI00180707                                                  |
| IPI00018387                                                  |
| IPI00183321                                                  |
| IPI00375205                                                  |
| IPI00004669                                                  |
| IPI00005401                                                  |

|                                                              |
|--------------------------------------------------------------|
| IPI00026991                                                  |
| IPI00328391                                                  |
| IPI00166613                                                  |
| IPI00021807,IPI00759616                                      |
| IPI00640006                                                  |
| IPI00031461                                                  |
| IPI00024705                                                  |
| IPI00414717,IPI00641153                                      |
| IPI00171411,IPI00759659,IPI00784293                          |
| IPI00759659,IPI00784293                                      |
| IPI00743931                                                  |
| IPI00031241,IPI00743931                                      |
| IPI00015688                                                  |
| IPI00232571                                                  |
| IPI00001755                                                  |
| IPI00030910,IPI00150961,IPI00639921,IPI00783872              |
| IPI00150961,IPI00783872                                      |
| IPI00651640                                                  |
| IPI00217481,IPI00423340,IPI00423342,IPI00651640,IPI00651770  |
| IPI00006166                                                  |
| IPI00397949,IPI00412420,IPI00783104                          |
| IPI00022228                                                  |
| IPI00027851,IPI00829779                                      |
| IPI00012585                                                  |
| IPI00018246                                                  |
| IPI00644631                                                  |
| IPI00742968                                                  |
| IPI00472882                                                  |
| IPI00760554                                                  |
| IPI00472736                                                  |
| IPI00472112,IPI00472448                                      |
| IPI00471955,IPI00472284,IPI00472456,IPI00646083,IPI00655604, |
| IPI00472284                                                  |
| IPI00472138,IPI00655604,IPI00747198                          |
| IPI00471951,IPI00816057                                      |
| IPI00472605                                                  |
| IPI00651697                                                  |
| IPI00473131                                                  |
| IPI00472035,IPI00745649                                      |
| IPI00789627                                                  |
| IPI00004672                                                  |
| IPI00171903,IPI00383296                                      |
| IPI00383296                                                  |
| IPI00157454,IPI00160316,IPI00395692                          |
| IPI00003362                                                  |
| IPI00003865                                                  |
| IPI00788958                                                  |
| IPI00007765                                                  |
| IPI00025512                                                  |
| IPI00024284                                                  |
| IPI00008494                                                  |
| IPI00290456                                                  |



|                                                 |
|-------------------------------------------------|
| IPI00790218                                     |
| IPI00289819                                     |
| IPI00056478                                     |
| IPI00020354,IPI00647552                         |
| IPI00021382                                     |
| IPI00297124                                     |
| IPI00009960,IPI00554469                         |
| IPI00009342                                     |
| IPI00031821                                     |
| IPI00099650                                     |
| IPI00060715                                     |
| IPI00008575,IPI00082310,IPI00385834,IPI00479209 |
| IPI00082310                                     |
| IPI00022296                                     |
| IPI00220142                                     |
| IPI00140177,IPI00218929,IPI00651704             |
| IPI00328753                                     |
| IPI00027087,IPI00334532,IPI00646281             |
| IPI00375294                                     |
| IPI00783665                                     |
| IPI00013976                                     |
| IPI00296922                                     |
| IPI00298281                                     |
| IPI00010471                                     |
| IPI00792252                                     |
| IPI00000070,IPI00792252                         |
| IPI00032491                                     |
| IPI00455739                                     |
| IPI00465431                                     |
| IPI00023673                                     |
| IPI00026530                                     |
| IPI00009950                                     |
| IPI00377047                                     |
| IPI00294839,IPI00782994                         |
| IPI00782994                                     |
| IPI00183445,IPI00410210                         |
| IPI00045841                                     |
| IPI00024292                                     |
| IPI00005774                                     |
| IPI00396321                                     |
| IPI00328716                                     |
| IPI00409640,IPI00409641,IPI00641640             |
| IPI00328218,IPI00409640,IPI00409641,IPI00641640 |
| IPI00303882                                     |
| IPI00009145                                     |
| IPI00008207                                     |
| IPI00219301                                     |
| IPI00641181                                     |
| IPI00016334                                     |
| IPI00029273,IPI00294528,IPI00792387             |
| IPI00002236,IPI00334005                         |
| IPI00025809                                     |

|                                                              |
|--------------------------------------------------------------|
| IPI00020407                                                  |
| IPI00374065,IPI00455473,IPI00739902,IPI00740837,IPI00741107  |
| IPI00640150,IPI00647961                                      |
| IPI00023461,IPI00216505,IPI00398718,IPI00479469,IPI00552765, |
| IPI00005707                                                  |
| IPI00219365                                                  |
| IPI00013955,IPI00218163,IPI00218164,IPI00218165,IPI00218169, |
| IPI00011448                                                  |
| IPI00019502                                                  |
| IPI00293817                                                  |
| IPI00555628                                                  |
| IPI00435020,IPI00795918                                      |
| IPI00023814,IPI00217291,IPI00472011                          |
| IPI00217291                                                  |
| IPI00384998,IPI00470575,IPI00513695,IPI00513705,IPI00655702, |
| IPI00026944                                                  |
| IPI00028908                                                  |
| IPI00337541                                                  |
| IPI00329352                                                  |
| IPI00297655                                                  |
| IPI00029819                                                  |
| IPI00333776,IPI00333777,IPI00333778,IPI00655818              |
| IPI00333778                                                  |
| IPI00783655                                                  |
| IPI00299594,IPI00398715                                      |
| IPI00165438,IPI00299594,IPI00398715,IPI00549340,IPI00607733, |
| IPI00300890,IPI00641131                                      |
| IPI00385236                                                  |
| IPI00009123                                                  |
| IPI00017841,IPI00419820,IPI00472517,IPI00550145              |
| IPI00010796                                                  |
| IPI00656138                                                  |
| IPI00177543,IPI00219041,IPI00219042,IPI00219043,IPI00749176  |
| IPI00219042                                                  |
| IPI00001869,IPI00513756                                      |
| IPI00176458,IPI00215992                                      |
| IPI00645206                                                  |
| IPI00552819                                                  |
| IPI00215946                                                  |
| IPI00009034                                                  |
| IPI00001428                                                  |
| IPI00025277                                                  |
| IPI00011865,IPI00018822                                      |
| IPI00007935                                                  |
| IPI00220739                                                  |
| IPI00010676,IPI00215706                                      |
| IPI00014898,IPI00186711,IPI00398002                          |
| IPI00398002                                                  |
| IPI00398778                                                  |
| IPI00027192                                                  |
| IPI00044369,IPI00073777,IPI00640599                          |
| IPI00398435,IPI00736693                                      |

|                                     |
|-------------------------------------|
| IPI00418458                         |
| IPI00026519                         |
| IPI00008380,IPI00815784             |
| IPI00419307,IPI00554737             |
| IPI00514424                         |
| IPI00002412                         |
| IPI00009276                         |
| IPI00012540                         |
| IPI00012503,IPI00219825             |
| IPI00744835                         |
| IPI00022048                         |
| IPI00555762                         |
| IPI00298292                         |
| IPI00375547                         |
| IPI00465186                         |
| IPI00107831,IPI00642154             |
| IPI00011651                         |
| IPI00015756,IPI00470937,IPI00644648 |
| IPI00743517                         |
| IPI00748312                         |
| IPI00176903,IPI00513773             |
| IPI00219425                         |
| IPI00219426                         |
| IPI00003648                         |
| IPI00215980                         |
| IPI00003590                         |
| IPI00465016                         |
| IPI00376394,IPI00479085,IPI00783371 |
| IPI00020436                         |
| IPI00291928                         |
| IPI00019345,IPI00640287             |
| IPI00015148                         |
| IPI00027500,IPI00478231             |
| IPI00027434,IPI00647268             |
| IPI00642211                         |
| IPI00829739                         |
| IPI00413108,IPI00553164             |
| IPI00215743                         |
| IPI00306382,IPI00453116,IPI00479205 |
| IPI00177968,IPI00291007,IPI00447020 |
| IPI00217435,IPI00747808             |
| IPI00002441                         |
| IPI00011564                         |
| IPI00299086,IPI00479018,IPI00794699 |
| IPI00293167                         |
| IPI00106642                         |
| IPI00005809                         |
| IPI00017376                         |
| IPI00170635                         |
| IPI00028213,IPI00783087             |
| IPI00024570                         |
| IPI00419724                         |

|                                                              |
|--------------------------------------------------------------|
| IPI00073763                                                  |
| IPI00023807                                                  |
| IPI00025257                                                  |
| IPI00414984,IPI00418183                                      |
| IPI00017480                                                  |
| IPI00019472                                                  |
| IPI00007084                                                  |
| IPI00220194                                                  |
| IPI00008085                                                  |
| IPI00027493,IPI00554481,IPI00554611,IPI00554702,IPI00554722, |
| IPI00554702,IPI00604710                                      |
| IPI00221393                                                  |
| IPI00176398                                                  |
| IPI00301812                                                  |
| IPI00412898                                                  |
| IPI00022608                                                  |
| IPI00217882                                                  |
| IPI00376403                                                  |
| IPI00011643,IPI00376403                                      |
| IPI00478292,IPI00744706,IPI00745092                          |
| IPI00745092                                                  |
| IPI00744706                                                  |
| IPI00005614                                                  |
| IPI00289795                                                  |
| IPI00001922                                                  |
| IPI00009629                                                  |
| IPI00020201                                                  |
| IPI00307200                                                  |
| IPI00239405,IPI00239406                                      |
| IPI00296215                                                  |
| IPI00647915                                                  |
| IPI00550363,IPI00644531,IPI00647915                          |
| IPI00022462                                                  |
| IPI00304865                                                  |
| IPI00788747                                                  |
| IPI00027166,IPI00787781,IPI00788747                          |
| IPI00298994,IPI00784273                                      |
| IPI00784273                                                  |
| IPI00443909                                                  |
| IPI00030131                                                  |
| IPI00064377                                                  |
| IPI00018880,IPI00796532                                      |
| IPI00030914                                                  |
| IPI00550917                                                  |
| IPI00410544,IPI00657807                                      |
| IPI00642826                                                  |
| IPI00170692                                                  |
| IPI00395488,IPI00745461                                      |
| IPI00156689                                                  |
| IPI00291175,IPI00307162                                      |
| IPI00307162                                                  |
| IPI00028076                                                  |

|                                     |
|-------------------------------------|
| IPI00746388                         |
| IPI00170796,IPI00184284,IPI00798102 |
| IPI00018931                         |
| IPI00022052                         |
| IPI00465430,IPI00644712             |
| IPI00183487                         |
| IPI00432723                         |

| SwissProt      |
|----------------|
| Q15942,        |
| Q9H3P7,        |
| P12821,        |
| O14672,        |
| Q13444         |
| Q13444         |
| P78536,        |
| P78536         |
| Q9H013,        |
| O75077,        |
| Q13443,        |
| Q9BV57,        |
| Q16186,        |
| O00170,        |
| P14550,        |
| Q13740,        |
| P51648         |
| P02760,        |
| Q9H6X2,        |
| P04083,        |
| P07355,        |
| P51693,        |
| Q06481         |
| P05067         |
| P48444,        |
| P84077,        |
| P15289,        |
| Q9NZ08,        |
| P05023,        |
| P13637,P50993, |
| P54709,        |
| P25705,        |
| P18859,        |
| Q15904,        |
| O75787,        |
| O75787,        |
| P38606,        |
| P21281,        |
| O75882,        |
| P30530,        |
| P25311,        |
| P61769,        |
| Q96L58,        |
| O43505,        |

|         |
|---------|
| Q9NY97, |
| P15291, |
| P15291, |
| O60513, |
| P80723, |
| P55957, |
| P35613  |
| P35613, |
| Q10588, |
| Q07021, |
| Q6NW34, |
| Q9BY67  |
| P62158, |
| Q8WVQ1, |
| P27824, |
| Q01518, |
| P07384, |
| P13500, |
| Q6YHK3, |
| P08571, |
| Q5ZPR3, |
| P16070, |
| P16070, |
| P16070, |
| P15529, |
| P08174, |
| P32970, |
| P60033, |
| P21926, |
| P60953, |
| P12830, |
| Q9Y6N8, |
| P55287, |
| P55290, |
| Q12864, |
| P19022, |
| P22223, |
| P22223  |
| P06731, |
| O00533, |
| O00533, |
| Q8IZ52, |
| Q9NPF2, |
| O00299, |
| O94985  |
| O94985, |
| Q9H4D0, |
| Q9BQT9, |
| Q9BQT9, |
| Q99439, |
| Q12860, |
| P08572, |



|         |
|---------|
| Q14031, |
| O75976, |
| P16870, |
| Q9NZV1, |
| P09603, |
| P29279, |
| P35222, |
| P35222, |
| O60888  |
| P09341, |
| Q8NCH0, |
| Q14118, |
| Q08345  |
| O94907, |
| Q12959, |
| P31689, |
| O60884, |
| Q8NFT8, |
| O00429, |
| Q02487  |
| Q14126, |
| P15924, |
| Q99848, |
| P20827, |
| P52803, |
| P98172, |
| Q6UY11, |
| Q13822, |
| O75354, |
| Q9Y2J2, |
| P54764, |
| P54756, |
| P07099, |
| Q16394, |
| Q9UBQ6, |
| Q9Y624, |
| Q14517, |
| P35555, |
| P35556, |
| Q9NZM1, |
| Q14512, |
| P11362, |
| Q8N441, |
| O75369  |
| Q14315  |
| Q86XX4, |
| Q5SZK8, |
| P09958, |
| Q7LFX5, |
| Q86SR1, |
| Q10471, |
| Q7Z7M9, |

|                                                                        |
|------------------------------------------------------------------------|
| Q8NCL4,                                                                |
| Q86SF2,                                                                |
| Q8N428,                                                                |
| P04062                                                                 |
| P50395                                                                 |
| P50395,                                                                |
| O14908,                                                                |
| Q92896,                                                                |
| Q8NBJ4,                                                                |
| Q8NBJ4,                                                                |
| Q9H8Y8,                                                                |
| Q9H8Y8,                                                                |
| P35052,                                                                |
| O75487,                                                                |
| Q9Y625,                                                                |
| Q14444,                                                                |
| Q14444                                                                 |
| Q86SQ4                                                                 |
| Q86SQ4,                                                                |
| O15354,                                                                |
| Q9Y653,                                                                |
| Q00341,                                                                |
| P06865,                                                                |
| P07686,                                                                |
| P19367,                                                                |
| P01892,                                                                |
| P05534,                                                                |
| P01891,                                                                |
| P10316,                                                                |
| Q09160,                                                                |
| P13746                                                                 |
| P18464,P30464,P30484,P30487,P30488,P30490,P30491,P30495,P30498,P30685, |
| P30495,                                                                |
| P10319,P30491,P30685,                                                  |
| Q07000,                                                                |
| P30501,                                                                |
| P04222,                                                                |
| Q29963,                                                                |
| Q29960,                                                                |
| A2ABE7                                                                 |
| P01893                                                                 |
| P52272,                                                                |
| P52272,                                                                |
| Q96MM7,Q96MM7,Q96MM7,                                                  |
| P11021,                                                                |
| P11142,                                                                |
| P38646,                                                                |
| P38646,                                                                |
| P04792,                                                                |
| P98160,                                                                |
| P05362,                                                                |
| Q9UMF0,                                                                |

|         |
|---------|
| O75144  |
| P11717, |
| Q969P0, |
| P78552, |
| P27930, |
| P40189, |
| Q16891, |
| P46940, |
| Q9Y287, |
| P78504, |
| Q96CX2, |
| Q07666, |
| Q07666, |
| P10721, |
| P21583, |
| Q96MU8, |
| Q86UP2, |
| P32004, |
| P25391, |
| O15230, |
| P07942, |
| P55268, |
| P11047, |
| P13796, |
| P01130, |
| P01130, |
| Q9Y2U8, |
| Q8NES3, |
| P17931, |
| Q08380, |
| P49257, |
| Q12907, |
| Q6UXI0  |
| Q9Y4K0, |
| Q9Y4K0, |
| O94910, |
| Q86VZ4, |
| P98164, |
| Q14114, |
| Q96AG4, |
| Q86UE6, |
| Q86X29, |
| Q86X29, |
| O60664, |
| O60476, |
| Q9UKM7, |
| P29966, |
| P49006, |
| P43121, |
| P08581, |
| Q08431, |
| Q10469, |

|         |
|---------|
| Q09328, |
| Q5JRA6  |
| Q29980  |
| P55196  |
| Q9UBG0, |
| P26038, |
| P15941  |
| Q9H3R2, |
| P35579, |
| Q99747, |
| P13592  |
| P13591, |
| Q92859, |
| Q92859, |
| O94856  |
| P14543, |
| Q14112, |
| Q13423, |
| Q15155, |
| Q04721, |
| Q9UM47, |
| Q92823, |
| Q92823, |
| Q92823  |
| O14786, |
| O14786, |
| O60462  |
| Q9HB63, |
| P80303, |
| Q99784, |
| P07237, |
| Q13153, |
| P19021, |
| P19021, |
| Q13219, |
| Q08174, |
| O14917  |
| Q8TAB3, |
| O60245, |
| Q9UN67, |
| Q9Y5E4, |
| O75340, |
| Q9GZP0, |
| Q96HC4, |
| O00264, |
| Q03405, |
| Q15149, |
| Q15149, |
| Q15149, |
| Q02809, |
| Q6UX71, |
| O15031, |

|         |
|---------|
| Q9H307  |
| P30405, |
| P67775, |
| P30153, |
| P50897, |
| P50897, |
| Q9UNN8, |
| O43490, |
| P07602  |
| P07602, |
| Q9P2B2, |
| Q13308, |
| Q13308, |
| P23468, |
| P10586  |
| P10586, |
| P23470, |
| Q15262, |
| Q13332  |
| P23471, |
| Q6NZI2, |
| P15151, |
| P15151, |
| Q15223, |
| Q92692, |
| O00391, |
| O00391, |
| Q6ZRP7, |
| Q15907, |
| P61106, |
| P62834, |
| P61224, |
| P61586, |
| P08134, |
| Q9H4A4, |
| Q9Y6N7  |
| P08865, |
| Q9P2E9, |
| O14828, |
| Q8WTV0, |
| Q8IWY4, |
| P18827, |
| P31431, |
| O00560, |
| Q99470, |
| Q9HCN8, |
| O95810, |
| Q15437, |
| Q8WVN6, |
| O95025, |
| Q9NS98, |
| Q9NPR2, |

|         |
|---------|
| Q9C0C4, |
| Q92854, |
| O75326, |
| O43556, |
| Q15465, |
| Q15758, |
| Q9UJS0, |
| P11166, |
| Q9ULF5  |
| P08195, |
| P08195  |
| Q8WWI5, |
| Q9H5Y7, |
| Q9H4F8, |
| Q9H4F8, |
| Q92673, |
| Q99523, |
| O43278, |
| O43278, |
| Q13813, |
| Q13813, |
| Q13813, |
| Q01082, |
| P78539, |
| Q9Y5Y6, |
| Q11201, |
| Q92187, |
| Q9UH65, |
| Q8WXH0, |
| P16422, |
| P37802  |
| P37802, |
| P02786, |
| Q03167, |
| P16035, |
| P16035, |
| Q9Y490, |
| Q9Y490, |
| Q9Y2B0, |
| P42167, |
| Q969Z4, |
| P19438, |
| P62079, |
| Q6IBS0, |
| Q8NBZ7, |
| Q9P0L0, |
| Q9P0L0, |
| Q6EMK4, |
| Q99536, |
| P18206  |
| P18206, |
| P49767, |

|         |
|---------|
| P15311, |
| Q9UBQ0, |
| Q96QK1, |
| O76076, |
| P12956, |
| Q86Y38, |
| Q9H1B5, |
