# Supplementary material
Source: PubMed Central journal article supplement (PMC2816016)
Supplement: M900134-MCP200_7.pdf [file M900134-MCP200_7.pdf]

## Supplementary Table 12: List of total extracellular proteins identified in th

### Found in Human Plasma Proteome Database

| Protein name                                                                                         |
|------------------------------------------------------------------------------------------------------|
| Gene_Symbol=- Trypsinogen C                                                                          |
| Gene_Symbol=ADAMTS1 ADAMTS-1 precursor                                                               |
| Gene_Symbol=ADAMTS12 ADAM metalloproteinase with thrombospondin type 1 motif, 12 preproprotein       |
| Gene_Symbol=ADAMTS19 ADAMTS-19 precursor                                                             |
| Gene_Symbol=ADAMTSL1 ADAMTS-like 1 isoform 1                                                         |
| Gene_Symbol=ADAMTSL2 ADAMTS-like 2                                                                   |
| Gene_Symbol=ADCYAP1 Pituitary adenylate cyclase-activating polypeptide precursor                     |
| Gene_Symbol=AGR2 AGR2                                                                                |
| Gene_Symbol=AGRN Agrin precursor                                                                     |
| Gene_Symbol=AGT Angiotensinogen precursor                                                            |
| Gene_Symbol=AKR1B1 Aldose reductase                                                                  |
| Gene_Symbol=ALB ALB protein                                                                          |
| Gene_Symbol=AMBP AMBP protein precursor                                                              |
| Gene_Symbol=ANGPTL4 Angiopoietin-related protein 4 precursor                                         |
| Gene_Symbol=ANXA2 annexin A2 isoform 1                                                               |
| Gene_Symbol=APOA1BP Apolipoprotein A-I binding protein                                               |
| Gene_Symbol=APOA1BP apolipoprotein A-I binding protein precursor                                     |
| Gene_Symbol=APOE Apolipoprotein E precursor                                                          |
| Gene_Symbol=APP Isoform APP770 of Amyloid beta A4 protein precursor (Fragment)                       |
| Gene_Symbol=ARMET ARMET protein precursor                                                            |
| Gene_Symbol=ARTS-1 type 1 tumor necrosis factor receptor shedding aminopeptidase regulator isoform a |
| Gene_Symbol=ATRN Isoform 1 of Attractin precursor                                                    |
| Gene_Symbol=AZGP1 alpha-2-glycoprotein 1, zinc                                                       |
| Gene_Symbol=BCHE Cholinesterase precursor                                                            |
| Gene_Symbol=BGN Biglycan precursor                                                                   |
| Gene_Symbol=BMP1 Isoform BMP1-1 of Bone morphogenetic protein 1 precursor                            |
| Gene_Symbol=BMP1 Isoform BMP1-5 of Bone morphogenetic protein 1 precursor                            |
| Gene_Symbol=BTBD9 Biotinidase precursor                                                              |
| Gene_Symbol=C12orf39 Uncharacterized protein C12orf39 precursor                                      |
| Gene_Symbol=C14orf141;LTBP2 Latent-transforming growth factor beta-binding protein 2 precursor       |
| Gene_Symbol=C19orf10 Uncharacterized protein C19orf10 precursor                                      |
| Gene_Symbol=C1R Complement C1r subcomponent precursor                                                |
| Gene_Symbol=C1S Complement C1s subcomponent precursor                                                |
| Gene_Symbol=C5 Complement component 5 variant (Fragment)                                             |
| Gene_Symbol=C6orf15 Uncharacterized protein C6orf15 precursor                                        |
| Gene_Symbol=CA6 Carbonic anhydrase 6 precursor                                                       |
| Gene_Symbol=CALCA Isoform 1 of Calcitonin precursor                                                  |
| Gene_Symbol=CALR Calreticulin precursor                                                              |
| Gene_Symbol=CCDC80 steroid-sensitive protein 1                                                       |
| Gene_Symbol=CCL2 Small inducible cytokine A2 precursor                                               |
| Gene_Symbol=CES1 Isoform 2 of Liver carboxylesterase 1 precursor                                     |
| Gene_Symbol=CFD complement factor D preproprotein                                                    |
| Gene_Symbol=CFH Isoform 1 of Complement factor H precursor                                           |
| Gene_Symbol=CHGA chromogranin A precursor                                                            |
| Gene_Symbol=CHGB Secretogranin-1 precursor                                                           |
| Gene_Symbol=CHID1 Isoform 2 of Chitinase domain-containing protein 1 precursor                       |
| Gene_Symbol=CHL1 Isoform 1 of Neural cell adhesion molecule L1-like protein precursor                |
| Gene_Symbol=CHL1 Isoform 2 of Neural cell adhesion molecule L1-like protein precursor                |

|                                                                                                           |
|-----------------------------------------------------------------------------------------------------------|
| Gene_Symbol=CHRD1 Ventroptin (Fragment)                                                                   |
| Gene_Symbol=CILP2 Similar to Cartilage intermediate layer protein                                         |
| Gene_Symbol=CLEC11A C-type lectin domain family 11 member A precursor                                     |
| Gene_Symbol=CLU Clusterin precursor                                                                       |
| Gene_Symbol=COCH Cochlin precursor                                                                        |
| Gene_Symbol=COL12A1 316 kDa protein                                                                       |
| Gene_Symbol=COL12A1 Isoform Long of Collagen alpha-1(XII) chain precursor                                 |
| Gene_Symbol=COL18A1 alpha 1 type XVIII collagen isoform 1 precursor                                       |
| Gene_Symbol=COL4A1 Collagen alpha-1(IV) chain precursor                                                   |
| Gene_Symbol=COL4A2 Collagen alpha-2(IV) chain precursor                                                   |
| Gene_Symbol=COL4A6 Isoform B of Collagen alpha-6(IV) chain precursor                                      |
| Gene_Symbol=COL5A1 Collagen alpha-1(V) chain precursor                                                    |
| Gene_Symbol=COL5A2 alpha 2 type V collagen preproprotein                                                  |
| Gene_Symbol=COL6A1 Collagen alpha-1(VI) chain precursor                                                   |
| Gene_Symbol=COL6A2 Isoform 2C2A of Collagen alpha-2(VI) chain precursor                                   |
| Gene_Symbol=COL8A1 Cell proliferation-inducing protein 41                                                 |
| Gene_Symbol=COPA Coatamer subunit alpha                                                                   |
| Gene_Symbol=CRH Corticoliberin precursor                                                                  |
| Gene_Symbol=CRIM1 Cysteine-rich motor neuron 1 protein precursor                                          |
| Gene_Symbol=CRISPLD1 Cysteine-rich secretory protein LCCL domain-containing 1 precursor                   |
| Gene_Symbol=CRLF1 Cytokine receptor-like factor 1 precursor                                               |
| Gene_Symbol=CRTAP Cartilage-associated protein precursor                                                  |
| Gene_Symbol=CSF1 Isoform 1 of Macrophage colony-stimulating factor 1 precursor                            |
| Gene_Symbol=CST1 Cystatin-SN precursor                                                                    |
| Gene_Symbol=CST3 Cystatin-C precursor                                                                     |
| Gene_Symbol=CTGF Isoform 1 of Connective tissue growth factor precursor                                   |
| Gene_Symbol=CTHRC1 Isoform 1 of Collagen triple helix repeat-containing protein 1 precursor               |
| Gene_Symbol=CTSD Cathepsin D precursor                                                                    |
| Gene_Symbol=CTSL1 Cathepsin L precursor                                                                   |
| Gene_Symbol=CXCL1 Growth-regulated protein alpha precursor                                                |
| Gene_Symbol=CXCL14 small inducible cytokine B14 precursor                                                 |
| Gene_Symbol=CXCL5 Small inducible cytokine B5 precursor                                                   |
| Gene_Symbol=CYR61 CYR61 protein                                                                           |
| Gene_Symbol=CYR61 Protein CYR61 precursor                                                                 |
| Gene_Symbol=DAG1 Dystroglycan precursor                                                                   |
| Gene_Symbol=DKK1 Dickkopf-related protein 1 precursor                                                     |
| Gene_Symbol=DNAJC10 DnaJ homolog subfamily C member 10                                                    |
| Gene_Symbol=ECM1 Extracellular matrix protein 1 precursor                                                 |
| Gene_Symbol=EDIL3 Isoform 1 of EGF-like repeat and discoidin I-like domain-containing protein 3 precursor |
| Gene_Symbol=EFEMP1 Isoform 1 of EGF-containing fibulin-like extracellular matrix protein 1 precursor      |
| Gene_Symbol=EFNA5 Ephrin-A5 precursor                                                                     |
| Gene_Symbol=ESM1 Endothelial cell-specific molecule 1 precursor                                           |
| Gene_Symbol=F10 Coagulation factor X precursor                                                            |
| Gene_Symbol=FAM20B Protein FAM20B precursor                                                               |
| Gene_Symbol=FAM3B 28 kDa protein                                                                          |
| Gene_Symbol=FAM3C Protein FAM3C precursor                                                                 |
| Gene_Symbol=FBLN1 Isoform C of Fibulin-1 precursor                                                        |
| Gene_Symbol=FBLN1 Isoform D of Fibulin-1 precursor                                                        |
| Gene_Symbol=FBLN2 fibulin 2 precursor, isoform a                                                          |
| Gene_Symbol=FBLN2 Fibulin-2 precursor                                                                     |
| Gene_Symbol=FBN1 Fibrillin-1 precursor                                                                    |
| Gene_Symbol=FBN2 fibrillin 2 precursor                                                                    |
| Gene_Symbol=FGF19 Fibroblast growth factor 19 precursor                                                   |
| Gene_Symbol=FGFBP1 Fibroblast growth factor-binding protein 1 precursor                                   |
| Gene_Symbol=FN1 fibronectin 1 isoform 2 preproprotein                                                     |
| Gene_Symbol=FN1 Isoform 1 of Fibronectin precursor                                                        |

|                                                                                                  |
|--------------------------------------------------------------------------------------------------|
| Gene_Symbol=FRAS1 Isoform 2 of Extracellular matrix protein FRAS1 precursor                      |
| Gene_Symbol=FREM2 Isoform 1 of FRAS1-related extracellular matrix protein 2 precursor            |
| Gene_Symbol=FST Isoform 1 of Follistatin precursor                                               |
| Gene_Symbol=FSTL1 Follistatin-related protein 1 precursor                                        |
| Gene_Symbol=FSTL3 Follistatin-related protein 3 precursor                                        |
| Gene_Symbol=FSTL4 Isoform 1 of Follistatin-related protein 4 precursor                           |
| Gene_Symbol=FSTL4 Isoform 2 of Follistatin-related protein 4 precursor                           |
| Gene_Symbol=FSTL5 Follistatin-related protein 5 precursor                                        |
| Gene_Symbol=FUCA2 Plasma alpha-L-fucosidase precursor                                            |
| Gene_Symbol=GAL Galanin precursor                                                                |
| Gene_Symbol=GAS6 Isoform 2 of Growth-arrest-specific protein 6 precursor                         |
| Gene_Symbol=GCG Glucagon precursor                                                               |
| Gene_Symbol=GDF15 Growth/differentiation factor 15 precursor                                     |
| Gene_Symbol=GLA Alpha-galactosidase A precursor                                                  |
| Gene_Symbol=GPC1 Glypican-1 precursor                                                            |
| Gene_Symbol=GPC4 Glypican-4 precursor                                                            |
| Gene_Symbol=GPC6 Glypican-6 precursor                                                            |
| Gene_Symbol=GPI Glucose-6-phosphate isomerase                                                    |
| Gene_Symbol=GPX3 Glutathione peroxidase 3 precursor                                              |
| Gene_Symbol=GREM2 Gremlin-2 precursor                                                            |
| Gene_Symbol=GRN Isoform 1 of Granulins precursor                                                 |
| Gene_Symbol=GRP Isoform 1 of Gastrin-releasing peptide precursor                                 |
| Gene_Symbol=GRP Isoform 2 of Gastrin-releasing peptide precursor                                 |
| Gene_Symbol=GSN Isoform 1 of Gelsolin precursor                                                  |
| Gene_Symbol=HDGF Hepatoma-derived growth factor                                                  |
| Gene_Symbol=HSPG2 Basement membrane-specific heparan sulfate proteoglycan core protein precursor |
| Gene_Symbol=HTRA1 Serine protease HTRA1 precursor                                                |
| Gene_Symbol=HYAL1 Isoform 2 of Hyaluronidase-1 precursor                                         |
| Gene_Symbol=IDE Insulin-degrading enzyme                                                         |
| Gene_Symbol=IGF1 Insulin-like growth factor IB precursor                                         |
| Gene_Symbol=IGFBP2 Insulin-like growth factor-binding protein 2 precursor                        |
| Gene_Symbol=IGFBP3 insulin-like growth factor binding protein 3 isoform a precursor              |
| Gene_Symbol=IGFBP3 Insulin-like growth factor-binding protein 3 precursor                        |
| Gene_Symbol=IGFBP5 Insulin-like growth factor-binding protein 5 precursor                        |
| Gene_Symbol=IGFBP6 Insulin-like growth factor-binding protein 6 precursor                        |
| Gene_Symbol=IGFBP7 Insulin-like growth factor-binding protein 7 precursor                        |
| Gene_Symbol=IGFBPL1 Insulin-like growth factor binding protein-like 1                            |
| Gene_Symbol=IL17C Interleukin-17C precursor                                                      |
| Gene_Symbol=IL6 Interleukin-6 precursor                                                          |
| Gene_Symbol=ISG15 Interferon-induced 17 kDa protein precursor                                    |
| Gene_Symbol=JAG1 Jagged-1 precursor                                                              |
| Gene_Symbol=KLK11 Isoform 1 of Kallikrein-11 precursor                                           |
| Gene_Symbol=KLK14 kallikrein 14 preproprotein                                                    |
| Gene_Symbol=LAMA1 Laminin subunit alpha-1 precursor                                              |
| Gene_Symbol=LAMA2 laminin alpha 2 subunit isoform b precursor                                    |
| Gene_Symbol=LAMA5 400 kDa protein                                                                |
| Gene_Symbol=LAMA5 Laminin subunit alpha-5 precursor                                              |
| Gene_Symbol=LAMB1 Laminin subunit beta-1 precursor                                               |
| Gene_Symbol=LAMB2 Laminin subunit beta-2 precursor                                               |
| Gene_Symbol=LAMC1 Laminin subunit gamma-1 precursor                                              |
| Gene_Symbol=LCN1 Lipocalin-1 precursor                                                           |
| Gene_Symbol=LFNG Isoform 1 of Beta-1,3-N-acetylglucosaminyltransferase lunatic fringe            |
| Gene_Symbol=LGALS1 Galectin-1                                                                    |
| Gene_Symbol=LGALS3 Galectin-3                                                                    |
| Gene_Symbol=LGALS3BP Galectin-3-binding protein precursor                                        |
| Gene_Symbol=LIPG Isoform 1 of Endothelial lipase precursor                                       |

|                                                                                                             |
|-------------------------------------------------------------------------------------------------------------|
| Gene_Symbol=LOXL2 Lysyl oxidase-like 2 variant                                                              |
| Gene_Symbol=LOXL2;ENTPD4 Lysyl oxidase homolog 2 precursor                                                  |
| Gene_Symbol=LGBP3 Isoform 1 of Latent-transforming growth factor beta-binding protein 3 precursor           |
| Gene_Symbol=LUM Lumican precursor                                                                           |
| Gene_Symbol=MAP2K1 Dual specificity mitogen-activated protein kinase kinase 1                               |
| Gene_Symbol=MATN2 Isoform 2 of Matrilin-2 precursor                                                         |
| Gene_Symbol=MATN3 Matrilin-3 precursor                                                                      |
| Gene_Symbol=MDK Midkine precursor                                                                           |
| Gene_Symbol=MFAP2 Microfibrillar-associated protein 2 precursor                                             |
| Gene_Symbol=MGAT4A mannosyl (alpha-1,3-)-glycoprotein beta-1,4-N-acetylglucosaminyltransferase, isoenzyme A |
| Gene_Symbol=MIF Macrophage migration inhibitory factor                                                      |
| Gene_Symbol=MMP1 Interstitial collagenase precursor                                                         |
| Gene_Symbol=MMP10 Stromelysin-2 precursor                                                                   |
| Gene_Symbol=MMP11 Stromelysin-3 precursor                                                                   |
| Gene_Symbol=MMP2 72 kDa type IV collagenase precursor                                                       |
| Gene_Symbol=NELL1 Protein kinase C-binding protein NELL1 precursor                                          |
| Gene_Symbol=NELL2 Cerebral protein-12                                                                       |
| Gene_Symbol=NENF Neudesin precursor                                                                         |
| Gene_Symbol=NID1 Isoform 1 of Nidogen-1 precursor                                                           |
| Gene_Symbol=NID2 Nidogen-2 precursor                                                                        |
| Gene_Symbol=NMB Isoform 1 of Neuromedin-B precursor                                                         |
| Gene_Symbol=NOV Protein NOV homolog precursor                                                               |
| Gene_Symbol=NPC2 Epididymal secretory protein E1 precursor                                                  |
| Gene_Symbol=NPTX2 Neuronal pentraxin-2 precursor                                                            |
| Gene_Symbol=NTN4 Isoform 3 of Netrin-4 precursor                                                            |
| Gene_Symbol=NUCB1 Nucleobindin-1 precursor                                                                  |
| Gene_Symbol=NUCB2 Nucleobindin-2 precursor                                                                  |
| Gene_Symbol=OLFML3 Isoform 1 of Olfactomedin-like protein 3 precursor                                       |
| Gene_Symbol=P4HB Protein disulfide-isomerase precursor                                                      |
| Gene_Symbol=PAPPA Pappalysin-1 precursor                                                                    |
| Gene_Symbol=PCOLCE Procollagen C-endopeptidase enhancer 1 precursor                                         |
| Gene_Symbol=PCOLCE2 Procollagen C-endopeptidase enhancer 2 precursor                                        |
| Gene_Symbol=PCK1N ProSAAS precursor                                                                         |
| Gene_Symbol=PCK2 Neuroendocrine convertase 2 precursor                                                      |
| Gene_Symbol=PCK5 Proprotein convertase subtilisin/kexin type 5                                              |
| Gene_Symbol=PCK9 Isoform 1 of Proprotein convertase subtilisin/kexin type 9 precursor                       |
| Gene_Symbol=PDGFC platelet-derived growth factor C precursor                                                |
| Gene_Symbol=PDGFR Platelet-derived growth factor receptor-like protein precursor                            |
| Gene_Symbol=PENK Proenkephalin A precursor                                                                  |
| Gene_Symbol=PLA2G3 Group 3 secretory phospholipase A2 precursor                                             |
| Gene_Symbol=PLA2G7 Platelet-activating factor acetylhydrolase precursor                                     |
| Gene_Symbol=PLAT Isoform 1 of Tissue-type plasminogen activator precursor                                   |
| Gene_Symbol=PLAU Urokinase-type plasminogen activator precursor                                             |
| Gene_Symbol=PLG Plasminogen precursor                                                                       |
| Gene_Symbol=PLTP Isoform 1 of Phospholipid transfer protein precursor                                       |
| Gene_Symbol=POSTN Isoform 1 of Periostin precursor                                                          |
| Gene_Symbol=PPT1 Palmitoyl-protein thioesterase 1                                                           |
| Gene_Symbol=PPT1 Palmitoyl-protein thioesterase 1 precursor                                                 |
| Gene_Symbol=PROM1 Prominin-1 precursor                                                                      |
| Gene_Symbol=PROS1 Vitamin K-dependent protein S precursor                                                   |
| Gene_Symbol=PRSS1 Trypsin-1 precursor                                                                       |
| Gene_Symbol=PRSS2 Protease serine 2 isoform B                                                               |
| Gene_Symbol=PSAP Isoform Sap-mu-0 of Proactivator polypeptide precursor                                     |
| Gene_Symbol=PSAP Isoform Sap-mu-9 of Proactivator polypeptide precursor                                     |
| Gene_Symbol=PTPRZ1 protein tyrosine phosphatase, receptor-type, zeta1 precursor                             |
| Gene_Symbol=PTX3 Pentraxin-related protein PTX3 precursor                                                   |

|                                                                                           |
|-------------------------------------------------------------------------------------------|
| Gene_Symbol=PVR Isoform Beta of Poliovirus receptor precursor                             |
| Gene_Symbol=PVR Isoform Gamma of Poliovirus receptor precursor                            |
| Gene_Symbol=RNASE4 Ribonuclease 4 precursor                                               |
| Gene_Symbol=RNASE4;ANG Angiogenin precursor                                               |
| Gene_Symbol=RNASET2 Isoform 1 of Ribonuclease T2 precursor                                |
| Gene_Symbol=RNPEP 68 kDa protein                                                          |
| Gene_Symbol=RNPEP Aminopeptidase B                                                        |
| Gene_Symbol=RTBDN retbindin isoform 2                                                     |
| Gene_Symbol=SCG2 Secretogranin-2 precursor                                                |
| Gene_Symbol=SCG3 Secretogranin-3 precursor                                                |
| Gene_Symbol=SCG5 Isoform 1 of Neuroendocrine protein 7B2 precursor                        |
| Gene_Symbol=SCPEP1 Isoform 1 of Retinoid-inducible serine carboxypeptidase precursor      |
| Gene_Symbol=SCUBE1 Signal peptide, CUB and EGF-like domain-containing protein 1 precursor |
| Gene_Symbol=SCYE1 37 kDa protein                                                          |
| Gene_Symbol=SCYE1 Multisynthetase complex auxiliary component p43                         |
| Gene_Symbol=SDF2 Stromal cell-derived factor 2 precursor                                  |
| Gene_Symbol=SECTM1 Secreted and transmembrane protein 1 precursor                         |
| Gene_Symbol=SEMA3A Semaphorin-3A precursor                                                |
| Gene_Symbol=SEMA3C Semaphorin-3C precursor                                                |
| Gene_Symbol=SEMA3E Semaphorin-3E precursor                                                |
| Gene_Symbol=SEMA7A Semaphorin-7A precursor                                                |
| Gene_Symbol=SERPINA1 Alpha-1-antitrypsin precursor                                        |
| Gene_Symbol=SERPINB2 Plasminogen activator inhibitor 2 precursor                          |
| Gene_Symbol=SERPINB5 Serpin B5 precursor                                                  |
| Gene_Symbol=SERPINE2 Glia-derived nexin precursor                                         |
| Gene_Symbol=SERPINF1 Pigment epithelium-derived factor precursor                          |
| Gene_Symbol=SERPING1 Plasma protease C1 inhibitor precursor                               |
| Gene_Symbol=SERPINI1 Neuroserpin precursor                                                |
| Gene_Symbol=SFN Isoform 1 of 14-3-3 protein sigma                                         |
| Gene_Symbol=SFRP1 Secreted frizzled-related protein 1 precursor                           |
| Gene_Symbol=SHH Sonic hedgehog protein precursor                                          |
| Gene_Symbol=SLIT3 Isoform 1 of Slit homolog 3 protein precursor                           |
| Gene_Symbol=SLPI Antileukoproteinase precursor                                            |
| Gene_Symbol=SMOC1 Isoform 1 of SPARC-related modular calcium-binding protein 1 precursor  |
| Gene_Symbol=SMOC1 Isoform 2 of SPARC-related modular calcium-binding protein 1 precursor  |
| Gene_Symbol=SMOC2 Isoform 1 of SPARC-related modular calcium-binding protein 2 precursor  |
| Gene_Symbol=SMOC2 Isoform 2 of SPARC-related modular calcium-binding protein 2 precursor  |
| Gene_Symbol=SPINT1 Isoform 1 of Kunitz-type protease inhibitor 1 precursor                |
| Gene_Symbol=SPINT1 Isoform 2 of Kunitz-type protease inhibitor 1 precursor                |
| Gene_Symbol=SPOCK1 Testican-1 precursor                                                   |
| Gene_Symbol=SPOCK2 Testican-2 precursor                                                   |
| Gene_Symbol=SPP1 Isoform A of Osteopontin precursor                                       |
| Gene_Symbol=SPP1 secreted phosphoprotein 1 isoform b                                      |
| Gene_Symbol=SRGN Secretory granule proteoglycan core protein precursor                    |
| Gene_Symbol=SRPX2 Sushi repeat-containing protein SRPX2 precursor                         |
| Gene_Symbol=ST14 Suppressor of tumorigenicity protein 14                                  |
| Gene_Symbol=STC1 Stanniocalcin-1 precursor                                                |
| Gene_Symbol=STC2 Stanniocalcin-2 precursor                                                |
| Gene_Symbol=TCN2 Transcobalamin-2 precursor                                               |
| Gene_Symbol=TFPI Isoform Alpha of Tissue factor pathway inhibitor precursor               |
| Gene_Symbol=TFPI2 Tissue factor pathway inhibitor 2 precursor                             |
| Gene_Symbol=TFRC Transferrin receptor protein 1                                           |
| Gene_Symbol=TGFB1 Transforming growth factor beta-1 precursor                             |
| Gene_Symbol=TGFB2 Isoform A of Transforming growth factor beta-2 precursor                |
| Gene_Symbol=TGFBI Transforming growth factor-beta-induced protein ig-h3 precursor         |
| Gene_Symbol=THBS1 Thrombospondin-1 precursor                                              |

|                                                                                       |
|---------------------------------------------------------------------------------------|
| Gene_Symbol=THBS3 Thrombospondin-3 precursor                                          |
| Gene_Symbol=TIMP1 Metalloproteinase inhibitor 1 precursor                             |
| Gene_Symbol=TIMP2 22 kDa protein                                                      |
| Gene_Symbol=TIMP2 Metalloproteinase inhibitor 2 precursor                             |
| Gene_Symbol=TINAGL1 Isoform 1 of Tubulointerstitial nephritis antigen-like precursor  |
| Gene_Symbol=TNC Isoform 1 of Tenascin precursor                                       |
| Gene_Symbol=TNFRSF11B Tumor necrosis factor receptor superfamily member 11B precursor |
| Gene_Symbol=TNFRSF1A Tumor necrosis factor receptor superfamily member 1A precursor   |
| Gene_Symbol=TPT1 Tumor protein, translationally-controlled 1                          |
| Gene_Symbol=TSKU Tsukushi precursor                                                   |
| Gene_Symbol=TWG1 Isoform 1 of Twisted gastrulation protein homolog 1 precursor        |
| Gene_Symbol=VCAN Isoform V0 of Versican core protein precursor                        |
| Gene_Symbol=VGF VGF nerve growth factor inducible precursor                           |
| Gene_Symbol=VIT Hypothetical protein VIT (vitrin)                                     |
| Gene_Symbol=WFDC2 Isoform 1 of WAP four-disulfide core domain protein 2 precursor     |
| Gene_Symbol=WIF1 Wnt inhibitory factor 1 precursor                                    |
| Gene_Symbol=WISP2 WNT1-inducible-signaling pathway protein 2 precursor                |
| Gene_Symbol=WNT5A Protein Wnt-5a precursor                                            |
| Gene_Symbol=YARS Tyrosyl-tRNA synthetase, cytoplasmic                                 |

ie 4 lung cancer cell lines H520, H23, H460 and H1688 from Mascot and

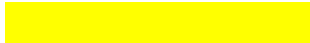

| Number of similar matches | Accession numbers                               | Protein molecular weight (AMU) |
|---------------------------|-------------------------------------------------|--------------------------------|
| 1                         | IPI00169276                                     | 26521.2                        |
| 1                         | IPI00005908                                     | 105339.7                       |
| 1                         | IPI00036578                                     | 177655.6                       |
| 1                         | IPI00152639                                     | 134043.9                       |
| 1                         | IPI00157513                                     | 75531.6                        |
| 1                         | IPI00790458                                     | 116265.1                       |
| 1                         | IPI00000027                                     | 18818.2                        |
| 1                         | IPI00007427                                     | 22220.9                        |
| 1                         | IPI00374563                                     | 214820                         |
| 1                         | IPI00032220                                     | 53136.8                        |
| 2                         | IPI00413641,IPI00556258                         | 35835.9                        |
| 2                         | IPI00022434,IPI00745872                         | 71686.9                        |
| 1                         | IPI00022426                                     | 38981.6                        |
| 2                         | IPI00153060,IPI00740170                         | 45196                          |
| 1                         | IPI00418169                                     | 40395.3                        |
| 1                         | IPI00514157                                     | 26668.3                        |
| 1                         | IPI00168479                                     | 31657.4                        |
| 1                         | IPI00021842                                     | 36135.5                        |
| 4                         | IPI00006608,IPI00219187,IPI00412681,IPI00412924 | 86923.3                        |
| 1                         | IPI00328748                                     | 26886.4                        |
| 2                         | IPI00165949,IPI00477831                         | 107826.4                       |
| 2                         | IPI00027235,IPI00478671                         | 158518.3                       |
| 1                         | IPI00166729                                     | 34240.6                        |
| 1                         | IPI00025864                                     | 72867.4                        |
| 2                         | IPI00010790,IPI00643384                         | 41637.9                        |
| 1                         | IPI00014021                                     | 82882.5                        |
| 1                         | IPI00218042                                     | 70451.2                        |
| 2                         | IPI00218413,IPI00744685                         | 61115.4                        |
| 1                         | IPI00012236                                     | 13285.2                        |
| 1                         | IPI00292150                                     | 195038.5                       |
| 1                         | IPI00056357                                     | 18776.9                        |
| 1                         | IPI00296165                                     | 80156.7                        |
| 1                         | IPI00017696                                     | 76666.2                        |
| 1                         | IPI00816741                                     | 123335.5                       |
| 1                         | IPI00022381                                     | 34205                          |
| 1                         | IPI00295105                                     | 35348.8                        |
| 1                         | IPI00000914                                     | 15449.8                        |
| 1                         | IPI00020599                                     | 48124.9                        |
| 1                         | IPI00260630                                     | 108158.4                       |
| 1                         | IPI00009308                                     | 11007.3                        |
| 1                         | IPI00607801                                     | 62575.5                        |
| 1                         | IPI00165972                                     | 27014.4                        |
| 1                         | IPI00029739                                     | 139052.1                       |
| 1                         | IPI00746813                                     | 50670.1                        |
| 1                         | IPI00006601                                     | 78228.1                        |
| 2                         | IPI00301185,IPI00306719                         | 47597.8                        |
| 1                         | IPI00783390                                     | 135011.5                       |
| 1                         | IPI00299059                                     | 136638.3                       |

|   |                                                 |          |
|---|-------------------------------------------------|----------|
| 2 | IPI00478414,IPI00654588                         | 52264.6  |
| 1 | IPI00216780                                     | 126838.6 |
| 1 | IPI00033466                                     | 35676.4  |
| 3 | IPI00291262,IPI00400826,IPI00795633             | 52477    |
| 2 | IPI00012386,IPI00791735                         | 59465.3  |
| 1 | IPI00827558                                     | 315848.4 |
| 1 | IPI00329573                                     | 333174.2 |
| 1 | IPI00828195                                     | 153749.1 |
| 1 | IPI00743696                                     | 160727.7 |
| 1 | IPI00306322                                     | 167521.7 |
| 1 | IPI00472200                                     | 163616.6 |
| 1 | IPI00477611                                     | 183593.6 |
| 1 | IPI00748917                                     | 144891.6 |
| 1 | IPI00291136                                     | 108513   |
| 2 | IPI00220613,IPI00304840                         | 97402.5  |
| 1 | IPI00219000                                     | 73437.6  |
| 1 | IPI00295857                                     | 138317.2 |
| 1 | IPI00027839                                     | 21404.4  |
| 1 | IPI00009294                                     | 113716.8 |
| 1 | IPI00027806                                     | 56869    |
| 1 | IPI00289561                                     | 46284.2  |
| 3 | IPI00220959,IPI00748502,IPI00793277             | 46545.5  |
| 1 | IPI00015881                                     | 60101.4  |
| 1 | IPI00305477                                     | 16343.8  |
| 1 | IPI00032293                                     | 15781.2  |
| 1 | IPI00020977                                     | 38072.7  |
| 1 | IPI00060423                                     | 26206.8  |
| 1 | IPI00011229                                     | 44535    |
| 1 | IPI00012887                                     | 37546.1  |
| 1 | IPI00013874                                     | 11283.7  |
| 1 | IPI00396257                                     | 13060.2  |
| 1 | IPI00292936                                     | 11954.5  |
| 1 | IPI00006273                                     | 37228.1  |
| 1 | IPI00299219                                     | 42008    |
| 1 | IPI00028911                                     | 97563.3  |
| 1 | IPI00016353                                     | 28653.1  |
| 1 | IPI00293260                                     | 91055.4  |
| 2 | IPI00003351,IPI00645849                         | 60655.4  |
| 2 | IPI00306046,IPI00399105                         | 53747    |
| 4 | IPI00029658,IPI00220813,IPI00220814,IPI00220815 | 54621.1  |
| 1 | IPI00005517                                     | 26279.4  |
| 1 | IPI00015186                                     | 20076.3  |
| 2 | IPI00019576,IPI00797559                         | 54714.1  |
| 1 | IPI00006657                                     | 46415.4  |
| 1 | IPI00790820                                     | 28265.3  |
| 2 | IPI00021923,IPI00334282                         | 24662.9  |
| 1 | IPI00296537                                     | 74441.9  |
| 1 | IPI00296534                                     | 77240.8  |
| 1 | IPI00465038                                     | 131840.5 |
| 2 | IPI00023824,IPI00465038                         | 126521.6 |
| 2 | IPI00328113,IPI00784458                         | 312283   |
| 2 | IPI00019439,IPI00784315                         | 314744.5 |
| 1 | IPI00032908                                     | 23984.7  |
| 1 | IPI00021399                                     | 26246.4  |
| 1 | IPI00470919                                     | 266182.2 |
| 1 | IPI00022418                                     | 262581   |



|   |                                     |          |
|---|-------------------------------------|----------|
| 1 | IPI00329327                         | 443604   |
| 1 | IPI00180707                         | 351136.8 |
| 3 | IPI00021081,IPI00217070,IPI00217071 | 37988.6  |
| 1 | IPI00029723                         | 34967.3  |
| 1 | IPI00025155                         | 27643.9  |
| 1 | IPI00477747                         | 93073.4  |
| 1 | IPI00298956                         | 74243.3  |
| 1 | IPI00008087                         | 95734.2  |
| 1 | IPI00012440                         | 54044.1  |
| 1 | IPI00026637                         | 13285.3  |
| 3 | IPI00032532,IPI00412410,IPI00412412 | 74906.6  |
| 1 | IPI00306140                         | 20891.8  |
| 1 | IPI00306543                         | 34150.9  |
| 1 | IPI00025869                         | 48750.3  |
| 1 | IPI00015688                         | 61633.3  |
| 1 | IPI00232571                         | 62394.5  |
| 1 | IPI00001755                         | 62718.3  |
| 1 | IPI00027497                         | 63130.5  |
| 1 | IPI00026199                         | 25488.2  |
| 1 | IPI00328709                         | 19302.2  |
| 1 | IPI00296713                         | 63522    |
| 3 | IPI00011722,IPI00218672,IPI00647318 | 16126.5  |
| 1 | IPI00218671                         | 15089.4  |
| 1 | IPI00026314                         | 85679.8  |
| 1 | IPI00020956                         | 26770.5  |
| 1 | IPI00024284                         | 468787.5 |
| 1 | IPI00003176                         | 51269.3  |
| 2 | IPI00168847,IPI00178140             | 45127.1  |
| 1 | IPI00220373                         | 118009   |
| 1 | IPI00433029                         | 21823.7  |
| 1 | IPI00297284                         | 35119.1  |
| 1 | IPI00556155                         | 32204.7  |
| 2 | IPI00018305,IPI00556155             | 31656.1  |
| 1 | IPI00029236                         | 30552    |
| 1 | IPI00029235                         | 25303.8  |
| 1 | IPI00016915                         | 29111.8  |
| 1 | IPI00291987                         | 28986.6  |
| 1 | IPI00002316                         | 21746.7  |
| 1 | IPI00007793                         | 23701.2  |
| 1 | IPI00375631                         | 17869.4  |
| 1 | IPI00099650                         | 133778   |
| 2 | IPI00002818,IPI00218137             | 27447.9  |
| 1 | IPI00793215                         | 29103.3  |
| 1 | IPI00375294                         | 337133.7 |
| 2 | IPI00218725,IPI00479834             | 343497.2 |
| 1 | IPI00641693                         | 400304   |
| 1 | IPI00783665                         | 399725.1 |
| 1 | IPI00013976                         | 198045.3 |
| 1 | IPI00296922                         | 196057.1 |
| 1 | IPI00298281                         | 177587.1 |
| 1 | IPI00009650                         | 19232.3  |
| 1 | IPI00455739                         | 41756.2  |
| 1 | IPI00219219                         | 14697.8  |
| 1 | IPI00465431                         | 26170.8  |
| 1 | IPI00023673                         | 65314.1  |
| 1 | IPI00005686                         | 56777.4  |

|   |                                                    |          |
|---|----------------------------------------------------|----------|
| 2 | IPI00294839,IPI00782994                            | 87000.3  |
| 1 | IPI00782994                                        | 86705.1  |
| 1 | IPI00073196                                        | 139336.6 |
| 2 | IPI00020986,IPI00794403                            | 38413.5  |
| 5 | IPI00003783,IPI00219604,IPI00419792,IPI00794480,IF | 43422.2  |
| 3 | IPI00168520,IPI00473118,IPI00554542                | 104756.7 |
| 1 | IPI00005690                                        | 52892.5  |
| 1 | IPI00010333                                        | 15567.3  |
| 2 | IPI00022621,IPI00644827                            | 20807.2  |
| 1 | IPI00016743                                        | 61528.6  |
| 1 | IPI00293276                                        | 12458.5  |
| 1 | IPI00008561                                        | 53989.9  |
| 1 | IPI00013405                                        | 54135    |
| 1 | IPI00306778                                        | 54600.9  |
| 1 | IPI00027780                                        | 73867.1  |
| 2 | IPI00023754,IPI00607581                            | 89586.5  |
| 1 | IPI00795624                                        | 91147.2  |
| 1 | IPI00002525                                        | 18839.1  |
| 1 | IPI00026944                                        | 136433.8 |
| 1 | IPI00028908                                        | 151376.5 |
| 2 | IPI00031753,IPI00220630                            | 13238.6  |
| 1 | IPI00011140                                        | 39142.7  |
| 1 | IPI00301579                                        | 16552    |
| 1 | IPI00026946                                        | 47024    |
| 1 | IPI00385236                                        | 66333    |
| 2 | IPI00295542,IPI00790899                            | 53861.6  |
| 1 | IPI00009123                                        | 50206.3  |
| 2 | IPI00024621,IPI00607652                            | 45993.2  |
| 1 | IPI00010796                                        | 57100.1  |
| 2 | IPI00001869,IPI00513756                            | 181119.7 |
| 1 | IPI00299738                                        | 47954.5  |
| 1 | IPI00002543                                        | 45699.3  |
| 1 | IPI00002280                                        | 27355.2  |
| 2 | IPI00029131,IPI00643663                            | 70548.2  |
| 2 | IPI00165229,IPI00294862                            | 101630.8 |
| 1 | IPI00387168                                        | 74352.6  |
| 1 | IPI00099977                                        | 39011.3  |
| 1 | IPI00006236                                        | 41842.9  |
| 1 | IPI00000828                                        | 30770.3  |
| 1 | IPI00024578                                        | 57132.8  |
| 1 | IPI00011588                                        | 50061.6  |
| 1 | IPI00019590                                        | 62898.6  |
| 1 | IPI00296180                                        | 48507.5  |
| 1 | IPI00019580                                        | 90549.4  |
| 1 | IPI00643034                                        | 54723.1  |
| 5 | IPI00007960,IPI00218585,IPI00410241,IPI00641231,IF | 93300    |
| 1 | IPI00514424                                        | 37114.4  |
| 1 | IPI00002412                                        | 34176    |
| 1 | IPI00012540                                        | 97188.4  |
| 1 | IPI00294004                                        | 75105.4  |
| 1 | IPI00011694                                        | 26540.1  |
| 2 | IPI00011695,IPI00815665                            | 28118.8  |
| 2 | IPI00012503,IPI00219825                            | 58094    |
| 1 | IPI00744835                                        | 58465.3  |
| 1 | IPI00748312                                        | 254569.4 |
| 1 | IPI00029568                                        | 42001.9  |

|   |                         |          |
|---|-------------------------|----------|
| 1 | IPI00219425             | 40105.9  |
| 1 | IPI00219426             | 39285.1  |
| 1 | IPI00029699             | 16822.4  |
| 1 | IPI00008554             | 16532.2  |
| 1 | IPI00414896             | 29463.2  |
| 1 | IPI00647400             | 68152.3  |
| 1 | IPI00642211             | 73481.6  |
| 2 | IPI00027765,IPI00829898 | 28146.2  |
| 1 | IPI00009362             | 70852.7  |
| 1 | IPI00292071             | 52990.2  |
| 1 | IPI00008944             | 23711.9  |
| 1 | IPI00012426             | 50814    |
| 2 | IPI00217435,IPI00747808 | 107801.9 |
| 1 | IPI00793201             | 37021.5  |
| 2 | IPI00006252,IPI00793201 | 34335    |
| 1 | IPI00293167             | 23007    |
| 1 | IPI00170635             | 27020.6  |
| 1 | IPI00031510             | 88872.8  |
| 1 | IPI00019209             | 85189.8  |
| 1 | IPI00004494             | 89211.5  |
| 1 | IPI00025257             | 74805.7  |
| 1 | IPI00553177             | 46719.9  |
| 1 | IPI00007117             | 46579.6  |
| 1 | IPI00783625             | 42122.1  |
| 1 | IPI00009890             | 43985.2  |
| 1 | IPI00006114             | 46326.4  |
| 2 | IPI00291866,IPI00556459 | 55137.5  |
| 1 | IPI00016150             | 46409.9  |
| 1 | IPI00013890             | 27756.8  |
| 1 | IPI00749245             | 35368.3  |
| 1 | IPI00017480             | 49907.6  |
| 1 | IPI00017640             | 167667.5 |
| 1 | IPI00008580             | 14308    |
| 1 | IPI00301812             | 48144.5  |
| 1 | IPI00412898             | 48243.6  |
| 1 | IPI00395336             | 49655.8  |
| 2 | IPI00301528,IPI00395336 | 50844.2  |
| 1 | IPI00376403             | 58379.3  |
| 2 | IPI00011643,IPI00376403 | 56866.7  |
| 1 | IPI00005292             | 49106.7  |
| 1 | IPI00006128             | 46761.4  |
| 2 | IPI00021000,IPI00385896 | 35404.6  |
| 1 | IPI00306339             | 33825.1  |
| 1 | IPI00019372             | 17606.5  |
| 1 | IPI00004446             | 52954.3  |
| 1 | IPI00001922             | 94751.1  |
| 1 | IPI00005564             | 27603.3  |
| 1 | IPI00008780             | 33230.1  |
| 1 | IPI00219465             | 47433.3  |
| 1 | IPI00021834             | 34998.1  |
| 1 | IPI00009198             | 26916.9  |
| 1 | IPI00022462             | 84855.6  |
| 1 | IPI00000075             | 44324.2  |
| 1 | IPI00235354             | 47731.4  |
| 1 | IPI00018219             | 74664.9  |
| 1 | IPI00296099             | 129363.7 |

|   |                                                 |          |
|---|-------------------------------------------------|----------|
| 1 | IPI00329535                                     | 104181.8 |
| 2 | IPI00032292,IPI00642739                         | 23153.1  |
| 1 | IPI00788747                                     | 21647.9  |
| 3 | IPI00027166,IPI00787781,IPI00788747             | 24381.9  |
| 1 | IPI00005563                                     | 52369    |
| 1 | IPI00031008                                     | 240845.2 |
| 1 | IPI00298362                                     | 46022.2  |
| 2 | IPI00018880,IPI00796532                         | 50477.4  |
| 2 | IPI00009943,IPI00550900                         | 21508.5  |
| 1 | IPI00641368                                     | 37790.4  |
| 2 | IPI00410487,IPI00830092                         | 24997.8  |
| 4 | IPI00009802,IPI00215628,IPI00215629,IPI00215631 | 372794.6 |
| 1 | IPI00069058                                     | 67239.9  |
| 3 | IPI00180759,IPI00784236,IPI00785025             | 75557.7  |
| 1 | IPI00291488                                     | 12974.4  |
| 1 | IPI00001863                                     | 41509.2  |
| 1 | IPI00022052                                     | 26806    |
| 2 | IPI00013178,IPI00795811                         | 40868.1  |
| 1 | IPI00007074                                     | 59127.1  |

## X! Tandem searching

| IPI                                             | SwissProt |
|-------------------------------------------------|-----------|
| IPI00169276                                     | P17538    |
| IPI00005908                                     | Q9UHI8,   |
| IPI00036578                                     | P58397,   |
| IPI00152639                                     | Q8TE59,   |
| IPI00157513                                     | Q8N6G6    |
| IPI00790458                                     | Q86TH1    |
| IPI00000027                                     | P18509,   |
| IPI00007427                                     | O95994,   |
| IPI00374563                                     | O00468,   |
| IPI00032220                                     | P01019,   |
| IPI00413641,IPI00556258                         | P15121,   |
| IPI00022434,IPI00745872                         | P02768,   |
| IPI00022426                                     | P02760,   |
| IPI00153060,IPI00740170                         | Q9BY76,   |
| IPI00418169                                     | P07355    |
| IPI00514157                                     | Q8NCW5    |
| IPI00168479                                     | Q8NCW5    |
| IPI00021842                                     | P02649,   |
| IPI00006608,IPI00219187,IPI00412681,IPI00412924 | P05067    |
| IPI00328748                                     | P55145,   |
| IPI00165949,IPI00477831                         | Q9NZ08,   |
| IPI00027235,IPI00478671                         | O75882,   |
| IPI00166729                                     | P25311,   |
| IPI00025864                                     | P06276,   |
| IPI00010790,IPI00643384                         | P21810,   |
| IPI00014021                                     | P13497,   |
| IPI00218042                                     | P13497,   |
| IPI00218413,IPI00744685                         | P43251,   |
| IPI00012236                                     | Q9BT56,   |
| IPI00292150                                     | Q14767,   |
| IPI00056357                                     | Q969H8,   |
| IPI00296165                                     | P00736,   |
| IPI00017696                                     | P09871,   |
| IPI00816741                                     | Q14CJ0    |
| IPI00022381                                     | Q6UXA7,   |
| IPI00295105                                     | P23280,   |
| IPI00000914                                     | P01258,   |
| IPI00020599                                     | P27797,   |
| IPI00260630                                     | Q6QD51    |
| IPI00009308                                     | P13500,   |
| IPI00607801                                     | P23141,   |
| IPI00165972                                     | P00746    |
| IPI00029739                                     | P08603,   |
| IPI00746813                                     | P10645    |
| IPI00006601                                     | P05060,   |
| IPI00301185,IPI00306719                         | Q9BWS9    |
| IPI00783390                                     | O00533,   |
| IPI00299059                                     | O00533,   |

|                                                 |         |
|-------------------------------------------------|---------|
| IPI00478414,IPI00654588                         | Q9BU40, |
| IPI00216780                                     | Q8IUL8, |
| IPI00033466                                     | Q9Y240, |
| IPI00291262,IPI00400826,IPI00795633             | P10909, |
| IPI00012386,IPI00791735                         | O43405, |
| IPI00827558                                     | Q99715, |
| IPI00329573                                     | Q99715, |
| IPI00828195                                     | P39060  |
| IPI00743696                                     | P02462  |
| IPI00306322                                     | P08572, |
| IPI00472200                                     | Q14031, |
| IPI00477611                                     | P20908  |
| IPI00748917                                     | P05997  |
| IPI00291136                                     | P12109, |
| IPI00220613,IPI00304840                         | P12110, |
| IPI00219000                                     | P27658, |
| IPI00295857                                     | P53621, |
| IPI00027839                                     | P06850, |
| IPI00009294                                     | Q9NZV1, |
| IPI00027806                                     | Q9H336, |
| IPI00289561                                     | O75462, |
| IPI00220959,IPI00748502,IPI00793277             | O75718, |
| IPI00015881                                     | P09603, |
| IPI00305477                                     | P01037, |
| IPI00032293                                     | P01034, |
| IPI00020977                                     | P29279, |
| IPI00060423                                     | Q96CG8, |
| IPI00011229                                     | P07339, |
| IPI00012887                                     | P07711, |
| IPI00013874                                     | P09341, |
| IPI00396257                                     | O95715, |
| IPI00292936                                     | P42830, |
| IPI00006273                                     | O00622, |
| IPI00299219                                     | O00622, |
| IPI00028911                                     | Q14118, |
| IPI00016353                                     | O94907, |
| IPI00293260                                     | Q8IXB1  |
| IPI00003351,IPI00645849                         | Q16610, |
| IPI00306046,IPI00399105                         | O43854  |
| IPI00029658,IPI00220813,IPI00220814,IPI00220815 | Q12805, |
| IPI00005517                                     | P52803, |
| IPI00015186                                     | Q9NQ30, |
| IPI00019576,IPI00797559                         | P00742, |
| IPI00006657                                     | O75063, |
| IPI00790820                                     | P58499  |
| IPI00021923,IPI00334282                         | Q92520, |
| IPI00296537                                     | P23142, |
| IPI00296534                                     | P23142, |
| IPI00465038                                     | P98095  |
| IPI00023824,IPI00465038                         | P98095, |
| IPI00328113,IPI00784458                         | P35555, |
| IPI00019439,IPI00784315                         | P35556, |
| IPI00032908                                     | O95750, |
| IPI00021399                                     | Q14512, |
| IPI00470919                                     | P02751  |
| IPI00022418                                     | P02751, |

|                                     |         |
|-------------------------------------|---------|
| IPI00329327                         | Q86XX4, |
| IPI00180707                         | Q5SZK8, |
| IPI00021081,IPI00217070,IPI00217071 | P19883  |
| IPI00029723                         | Q12841, |
| IPI00025155                         | O95633, |
| IPI00477747                         | Q6MZW2, |
| IPI00298956                         | Q6MZW2, |
| IPI00008087                         | Q8N475, |
| IPI00012440                         | Q9BTY2, |
| IPI00026637                         | P22466, |
| IPI00032532,IPI00412410,IPI00412412 | Q14393, |
| IPI00306140                         | P01275, |
| IPI00306543                         | Q99988, |
| IPI00025869                         | P06280, |
| IPI00015688                         | P35052, |
| IPI00232571                         | O75487, |
| IPI00001755                         | Q9Y625, |
| IPI00027497                         | P06744, |
| IPI00026199                         | P22352, |
| IPI00328709                         | Q9H772, |
| IPI00296713                         | P28799, |
| IPI00011722,IPI00218672,IPI00647318 | P07492  |
| IPI00218671                         | P07492, |
| IPI00026314                         | P06396, |
| IPI00020956                         | P51858, |
| IPI00024284                         | P98160, |
| IPI00003176                         | Q92743, |
| IPI00168847,IPI00178140             | Q12794, |
| IPI00220373                         | P14735, |
| IPI00433029                         | P05019, |
| IPI00297284                         | P18065, |
| IPI00556155                         | P17936  |
| IPI00018305,IPI00556155             | P17936, |
| IPI00029236                         | P24593, |
| IPI00029235                         | P24592, |
| IPI00016915                         | Q16270, |
| IPI00291987                         | Q8WX77  |
| IPI00002316                         | Q9P0M4, |
| IPI00007793                         | P05231, |
| IPI00375631                         | P05161, |
| IPI00099650                         | P78504, |
| IPI00002818,IPI00218137             | Q9UBX7, |
| IPI00793215                         | Q9P0G3  |
| IPI00375294                         | P25391, |
| IPI00218725,IPI00479834             | P24043, |
| IPI00641693                         | O15230, |
| IPI00783665                         | O15230, |
| IPI00013976                         | P07942, |
| IPI00296922                         | P55268, |
| IPI00298281                         | P11047, |
| IPI00009650                         | P31025, |
| IPI00455739                         | Q8NES3, |
| IPI00219219                         | P09382, |
| IPI00465431                         | P17931, |
| IPI00023673                         | Q08380, |
| IPI00005686                         | Q9Y5X9, |

|                                                    |                |
|----------------------------------------------------|----------------|
| IPI00294839,IPI00782994                            | Q9Y4K0,        |
| IPI00782994                                        | Q9Y4K0,        |
| IPI00073196                                        | Q9NS15,        |
| IPI00020986,IPI00794403                            | P51884,        |
| IPI00003783,IPI00219604,IPI00419792,IPI00794480,IP | P36507,Q02750, |
| IPI00168520,IPI00473118,IPI00554542                | O00339         |
| IPI00005690                                        | O15232,        |
| IPI00010333                                        | P21741,        |
| IPI00022621,IPI00644827                            | P55001,        |
| IPI00016743                                        | Q9UM21         |
| IPI00293276                                        | P14174,        |
| IPI00008561                                        | P03956,        |
| IPI00013405                                        | P09238,        |
| IPI00306778                                        | P24347,        |
| IPI00027780                                        | P08253,        |
| IPI00023754,IPI00607581                            | Q92832,        |
| IPI00795624                                        | Q99435         |
| IPI00002525                                        | Q9UMX5,        |
| IPI00026944                                        | P14543,        |
| IPI00028908                                        | Q14112,        |
| IPI00031753,IPI00220630                            | P08949,        |
| IPI00011140                                        | P48745,        |
| IPI00301579                                        | P61916,        |
| IPI00026946                                        | P47972,        |
| IPI00385236                                        | Q9HB63,        |
| IPI00295542,IPI00790899                            | Q02818,        |
| IPI00009123                                        | P80303,        |
| IPI00024621,IPI00607652                            | Q9NRN5         |
| IPI00010796                                        | P07237,        |
| IPI00001869,IPI00513756                            | Q13219,        |
| IPI00299738                                        | Q15113,        |
| IPI00002543                                        | Q9UKZ9,        |
| IPI00002280                                        | Q9UHG2,        |
| IPI00029131,IPI00643663                            | P16519,        |
| IPI00165229,IPI00294862                            | Q92824,        |
| IPI00387168                                        | Q8NBP7,        |
| IPI00099977                                        | Q9NRA1         |
| IPI00006236                                        | Q15198,        |
| IPI00000828                                        | P01210,        |
| IPI00024578                                        | Q9NZ20,        |
| IPI00011588                                        | Q13093,        |
| IPI00019590                                        | P00750,        |
| IPI00296180                                        | P00749,        |
| IPI00019580                                        | P00747,        |
| IPI00643034                                        | P55058,        |
| IPI00007960,IPI00218585,IPI00410241,IPI00641231,IP | Q15063,        |
| IPI00514424                                        | P50897,        |
| IPI00002412                                        | P50897,        |
| IPI00012540                                        | O43490,        |
| IPI00294004                                        | P07225,        |
| IPI00011694                                        | P07477,        |
| IPI00011695,IPI00815665                            | P07478,        |
| IPI00012503,IPI00219825                            | P07602         |
| IPI00744835                                        | P07602,        |
| IPI00748312                                        | P23471,        |
| IPI00029568                                        | P26022,        |



|                         |         |
|-------------------------|---------|
| IPI00219425             | P15151, |
| IPI00219426             | P15151, |
| IPI00029699             | P34096, |
| IPI00008554             | P03950, |
| IPI00414896             | O00584, |
| IPI00647400             | Q9H4A4  |
| IPI00642211             | Q9H4A4, |
| IPI00027765,IPI00829898 | Q9BSG5, |
| IPI00009362             | P13521, |
| IPI00292071             | Q8WXD2, |
| IPI00008944             | P05408, |
| IPI00012426             | Q9HB40, |
| IPI00217435,IPI00747808 | Q8IWY4, |
| IPI00793201             | Q12904  |
| IPI00006252,IPI00793201 | Q12904, |
| IPI00293167             | Q99470, |
| IPI00170635             | Q8WVN6, |
| IPI00031510             | Q14563, |
| IPI00019209             | Q99985, |
| IPI00004494             | O15041, |
| IPI00025257             | O75326, |
| IPI00553177             | P01009, |
| IPI00007117             | P05120, |
| IPI00783625             | P36952, |
| IPI00009890             | P07093, |
| IPI00006114             | P36955, |
| IPI00291866,IPI00556459 | P05155, |
| IPI00016150             | Q99574, |
| IPI00013890             | P31947, |
| IPI00749245             | Q8N474, |
| IPI00017480             | Q15465, |
| IPI00017640             | O75094, |
| IPI00008580             | P03973, |
| IPI00301812             | Q9H4F8, |
| IPI00412898             | Q9H4F8, |
| IPI00395336             | Q9H3U7, |
| IPI00301528,IPI00395336 | Q9H3U7  |
| IPI00376403             | O43278, |
| IPI00011643,IPI00376403 | O43278, |
| IPI00005292             | Q08629, |
| IPI00006128             | Q92563, |
| IPI00021000,IPI00385896 | P10451  |
| IPI00306339             | P10451  |
| IPI00019372             | P10124, |
| IPI00004446             | O60687  |
| IPI00001922             | Q9Y5Y6, |
| IPI00005564             | P52823, |
| IPI00008780             | O76061, |
| IPI00219465             | P20062, |
| IPI00021834             | P10646, |
| IPI00009198             | P48307, |
| IPI00022462             | P02786, |
| IPI00000075             | P01137, |
| IPI00235354             | P61812, |
| IPI00018219             | Q15582, |
| IPI00296099             | P07996, |

|                                                 |         |
|-------------------------------------------------|---------|
| IPI00329535                                     | P49746, |
| IPI00032292,IPI00642739                         | P01033, |
| IPI00788747                                     | P16035, |
| IPI00027166,IPI00787781,IPI00788747             | P16035, |
| IPI00005563                                     | Q9GZM7, |
| IPI00031008                                     | P24821, |
| IPI00298362                                     | O00300, |
| IPI00018880,IPI00796532                         | P19438, |
| IPI00009943,IPI00550900                         | P13693, |
| IPI00641368                                     | Q8WUA8, |
| IPI00410487,IPI00830092                         | Q9GZX9  |
| IPI00009802,IPI00215628,IPI00215629,IPI00215631 | P13611, |
| IPI00069058                                     | O15240  |
| IPI00180759,IPI00784236,IPI00785025             | Q6UXI7, |
| IPI00291488                                     | Q14508, |
| IPI00001863                                     | Q9Y5W5, |
| IPI00022052                                     | O76076, |
| IPI00013178,IPI00795811                         | P41221, |
| IPI00007074                                     | P54577, |
