# Supplementary material
Source: PubMed Central journal article supplement (PMC2816016)
Supplement: M900134-MCP200_8.pdf [file M900134-MCP200_8.pdf]

Supplementary Figure 1

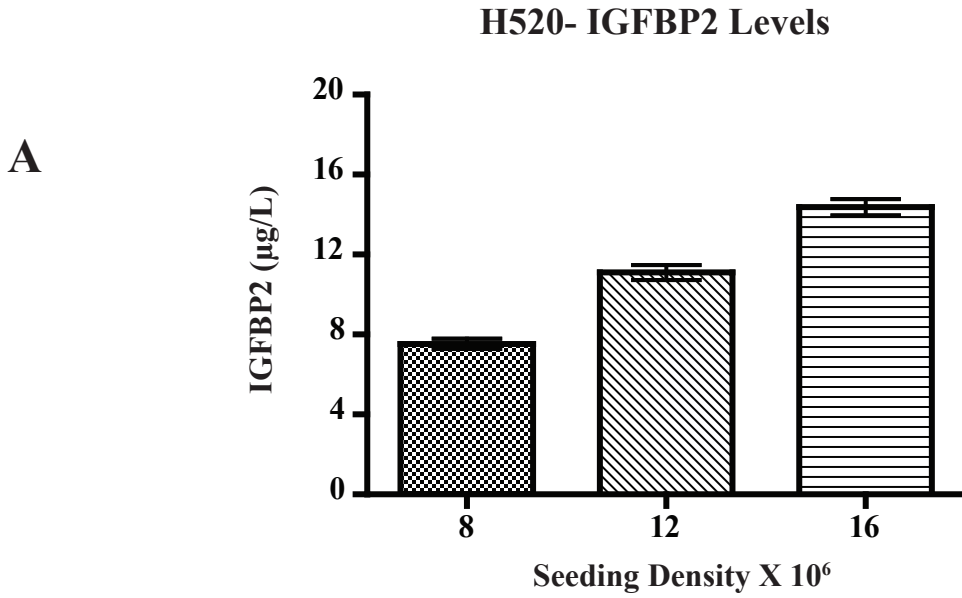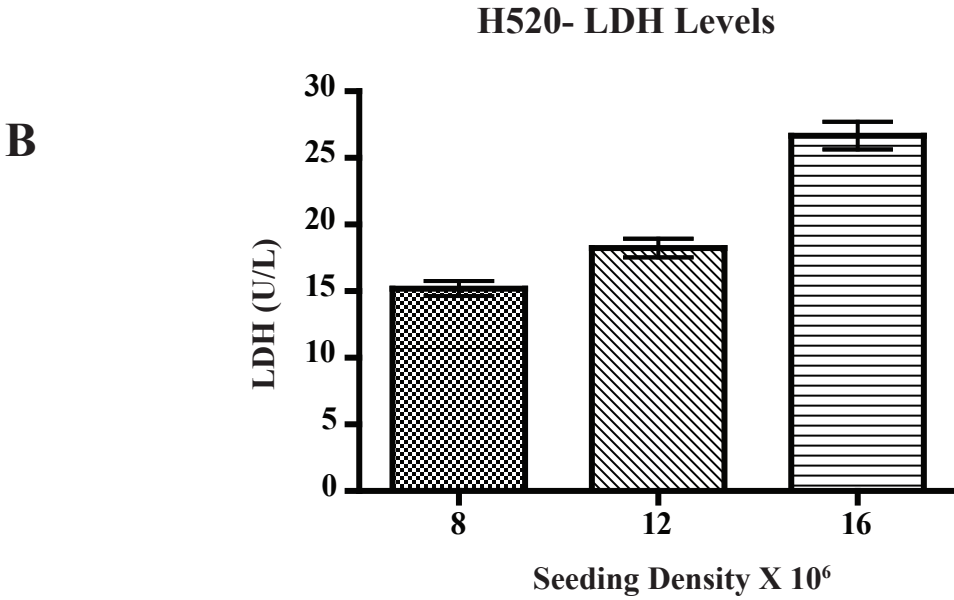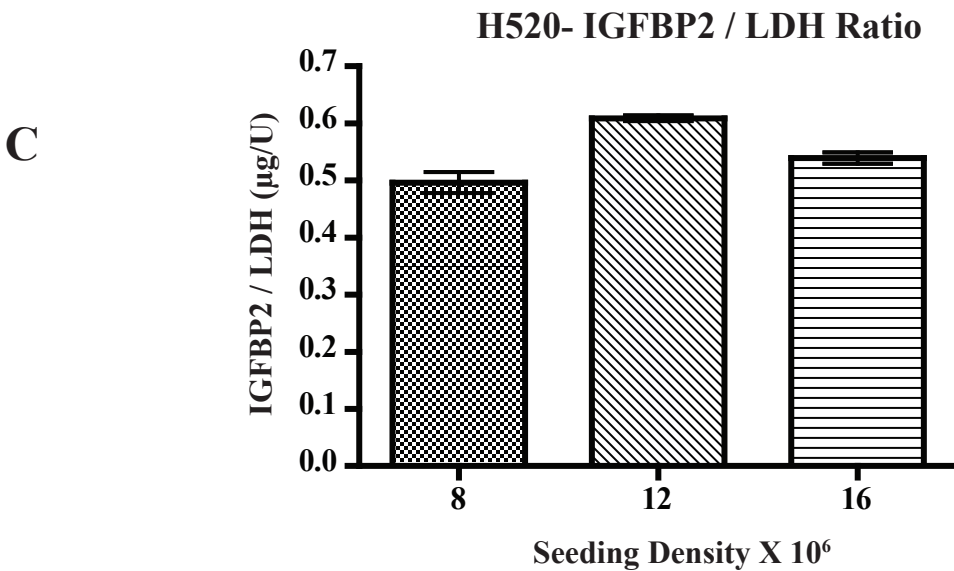

**A**

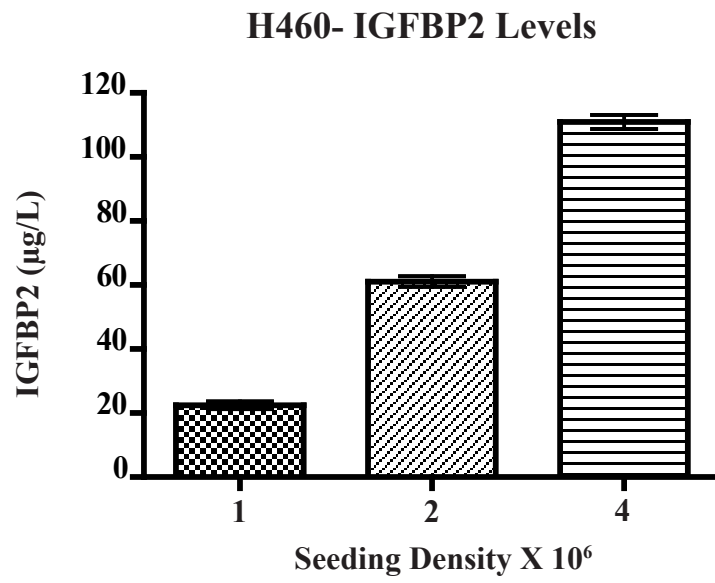

**B**

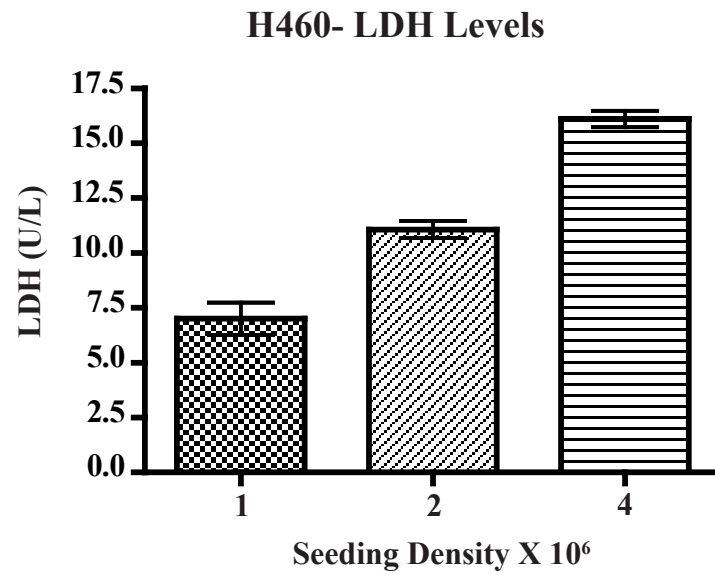

**C**

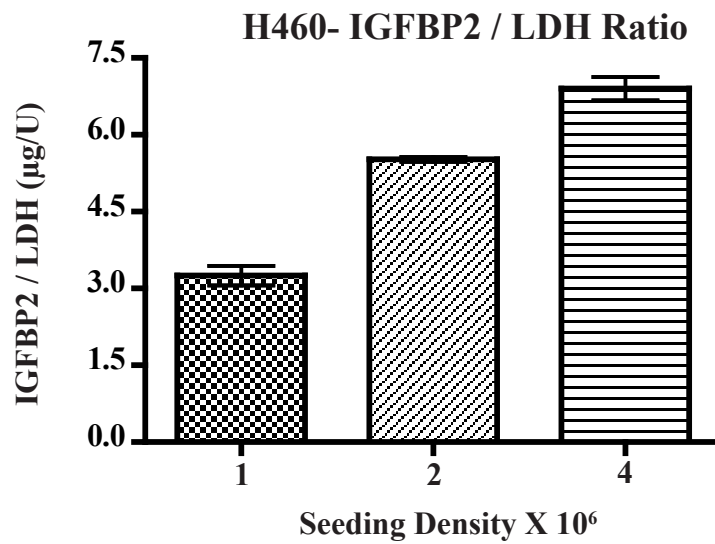

Supplementary Figure 3

A

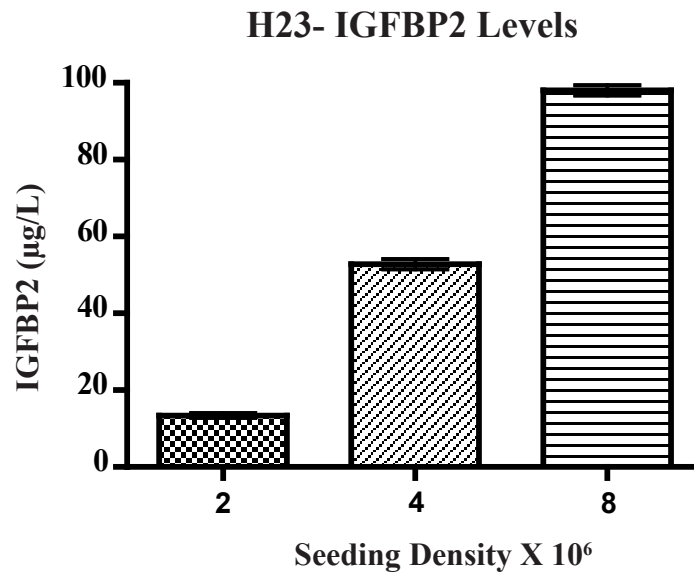

B

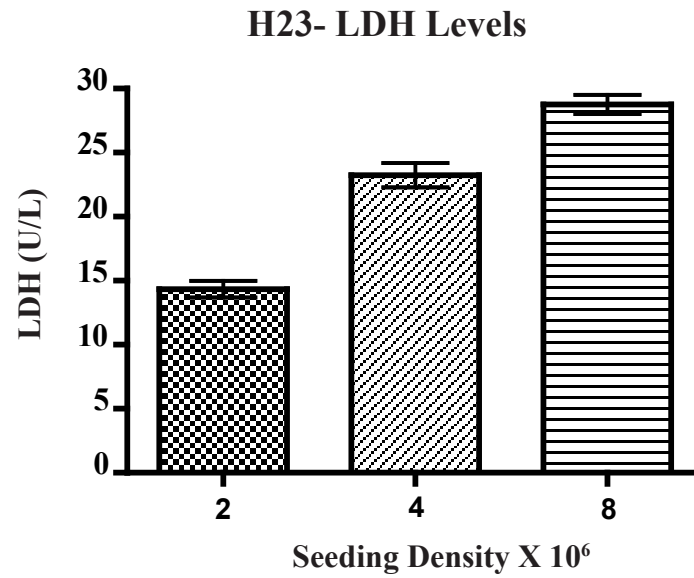

C

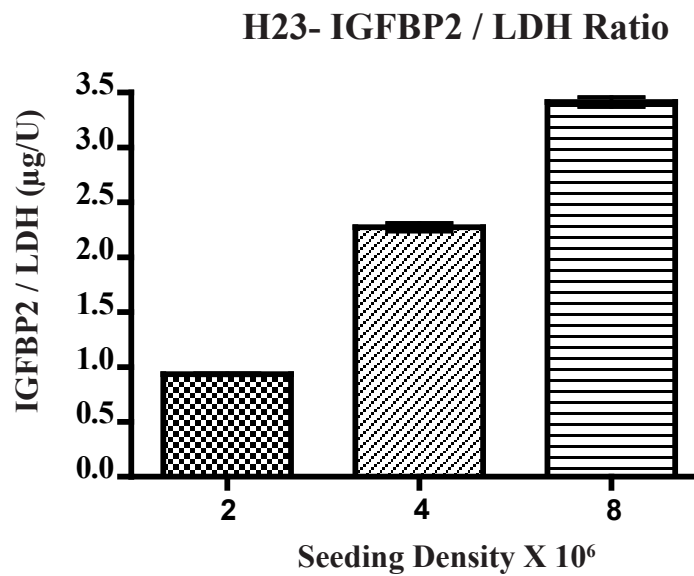

Supplementary Figure 4

A

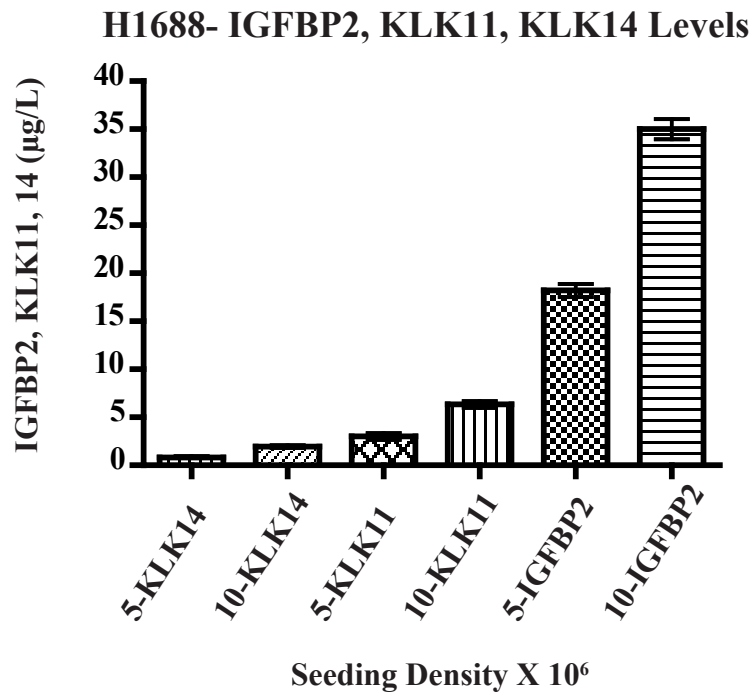

B

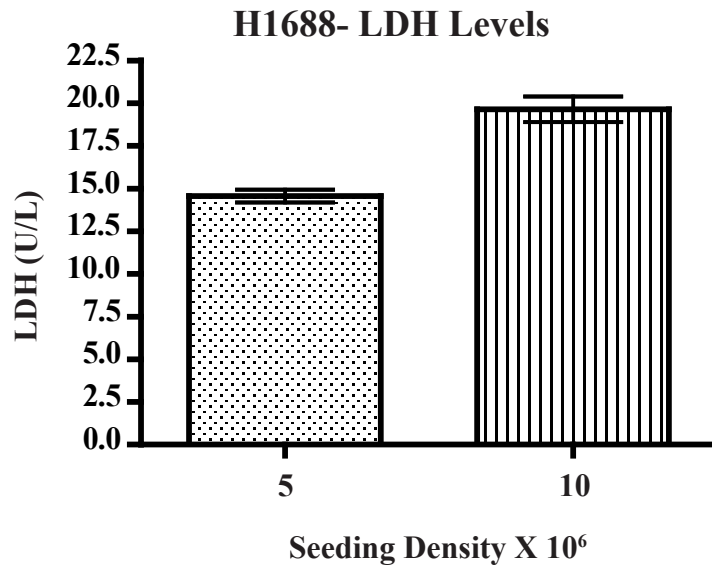

C

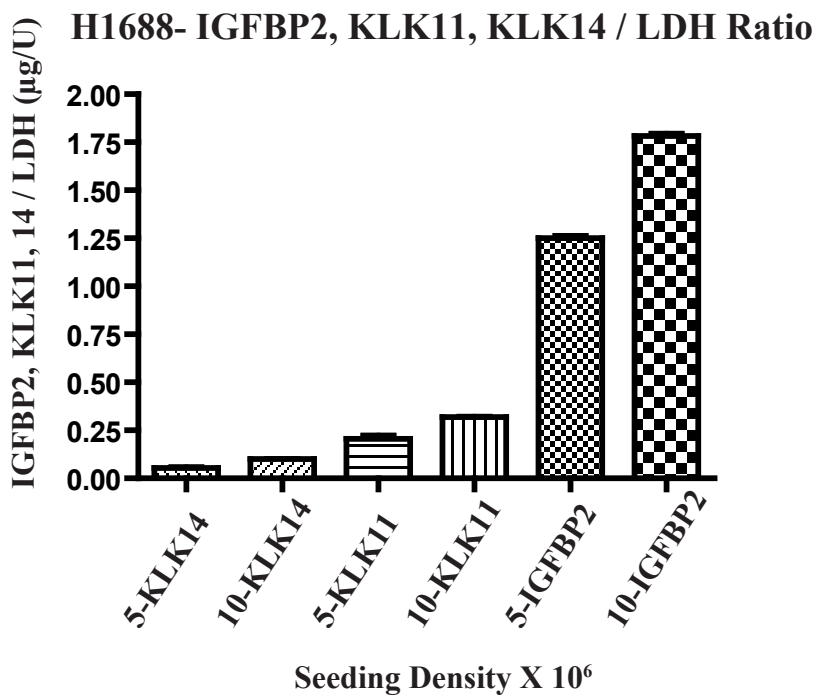

## Supplementary Figure 5

**A)**

IPI00297284 (100%), 35137.1 Da

Gene\_Symbol=IGFBP2 Insulin-like growth factor-binding protein 2 precursor

13 unique peptides, 48 unique spectra, 80 total spectra, 146/328 amino acids (45% coverage)

|              |              |              |              |             |
|--------------|--------------|--------------|--------------|-------------|
| MLPRVGC PAL  | PLPPPPL LPL  | LPLLLLLL LGA | SGGGGGARAE   | VLFRCP PCTP |
| ERLAACG PPP  | VAPPA AVAAV  | AGGAR MP CAE | LVREPG CGCC  | SVCAR LEGEA |
| CGVYT PR CGQ | GLR CYP HPGS | ELPLQAL VMG  | EGTCEK RRD A | EYGASPEQVA  |
| DNGDDHSEGG   | LVENHVDSTM   | NMLGGGGSAG   | RKPLKSGMKE   | LAVFREKVTE  |
| QHRQMKGKGGK  | HHLGLEE PPK  | LRPPPAR TPC  | QQELDQVLER   | ISTMRLPDER  |
| GPLEHLYSLH   | IPNCDKHGLY   | NLKQCKMSLN   | GQRGECWCVN   | PNTGKLIQGA  |
| PTIRGDPECH   | LFYNEQQEAR   | GVHTQRMQ     |              |             |

**B)**

IPI00002818 (100%), 27465.9 Da

Gene\_Symbol=KLK11 Isoform 1 of Kallikrein-11 precursor

7 unique peptides, 14 unique spectra, 14 total spectra, 101/250 amino acids (40% coverage)

|             |            |             |             |            |
|-------------|------------|-------------|-------------|------------|
| MRILQLILLA  | LATGLVGGET | RIIKGFECKP  | HSQPWQAALF  | EKTRLLCGAT |
| LIAPRWLLTA  | AHCLKPRYIV | HLGQHNLQKE  | EGCEQTRTAT  | ESFPHPGFNN |
| SLPNKDHRND  | IMLVKMASPV | SITWAVRPLT  | LSSRCV TAGT | SCLISGWGST |
| SSPQLR LPHT | LRCANITIE  | HQKCENAYPG  | NITDTMVCAS  | VQEGGKDSQ  |
| GDSGGPLVCN  | QSLQGIISWG | QDPCA ITRKP | GVYTKVCKYV  | DWIIQETMKN |

**C)**

IPI00793215 (100%), 29121.3 Da

Gene\_Symbol=KLK14 kallikrein 14 preproprotein

3 unique peptides, 3 unique spectra, 3 total spectra, 46/267 amino acids (17% coverage)

|             |             |            |             |             |
|-------------|-------------|------------|-------------|-------------|
| MSLRVLGSGT  | WPSAPKMFL L | LTALQVLAIA | MTQSQEDENK  | IIGGHTCTR S |
| SQPWQAALLA  | GPRRRFLCGG  | ALLSGQWVIT | AAHCGRPILQ  | VALGKHNLRR  |
| WEATQQVLRV  | VRQVTHPNYN  | SRTHDNDLML | LQLQQPARIG  | RAVRPIEVTQ  |
| ACASPGTSCR  | VSGWGTISSP  | IARYPASLQC | VNINISPDEV  | CQKAYPRTIT  |
| PGMVCAGV PQ | GGKDSCQGDS  | GGPLVCRGQL | QGLVSWG MER | CALPGYPGVY  |
| TNLCKYRSWI  | EETMRDK     |            |             |             |

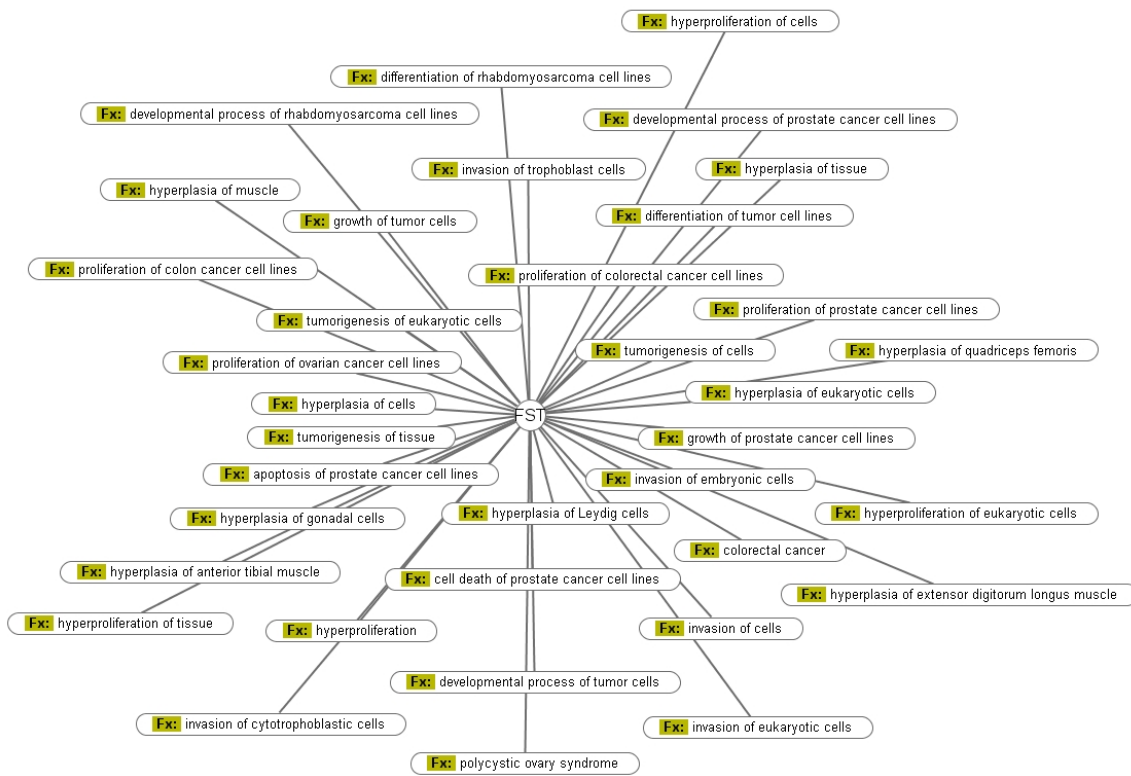

Supplementary figure 6

PTX3

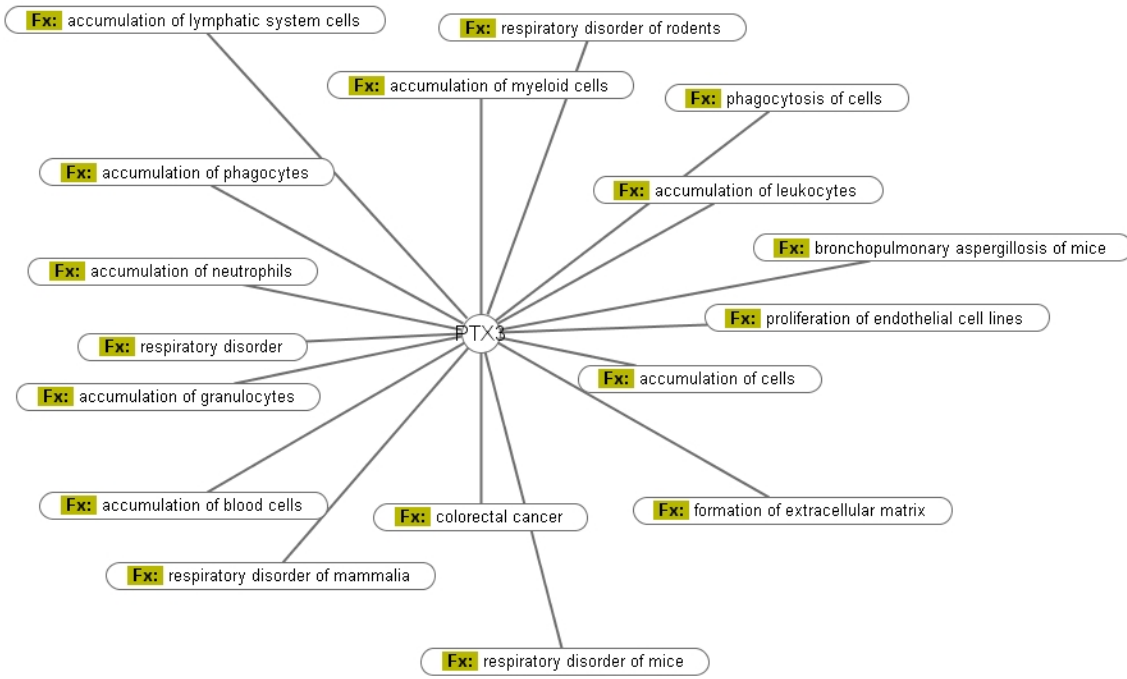

© 2000-2008 Ingenuity Systems, Inc. All rights reserved.

**Supplementary figure 7**

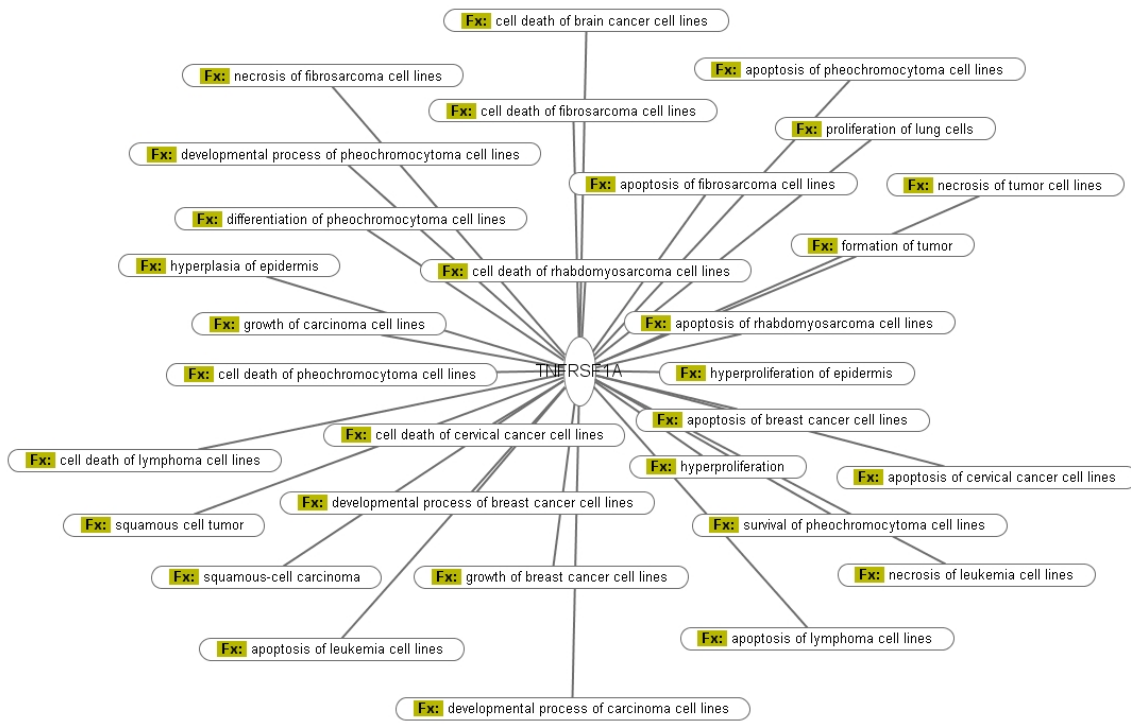

Supplementary Figure 8



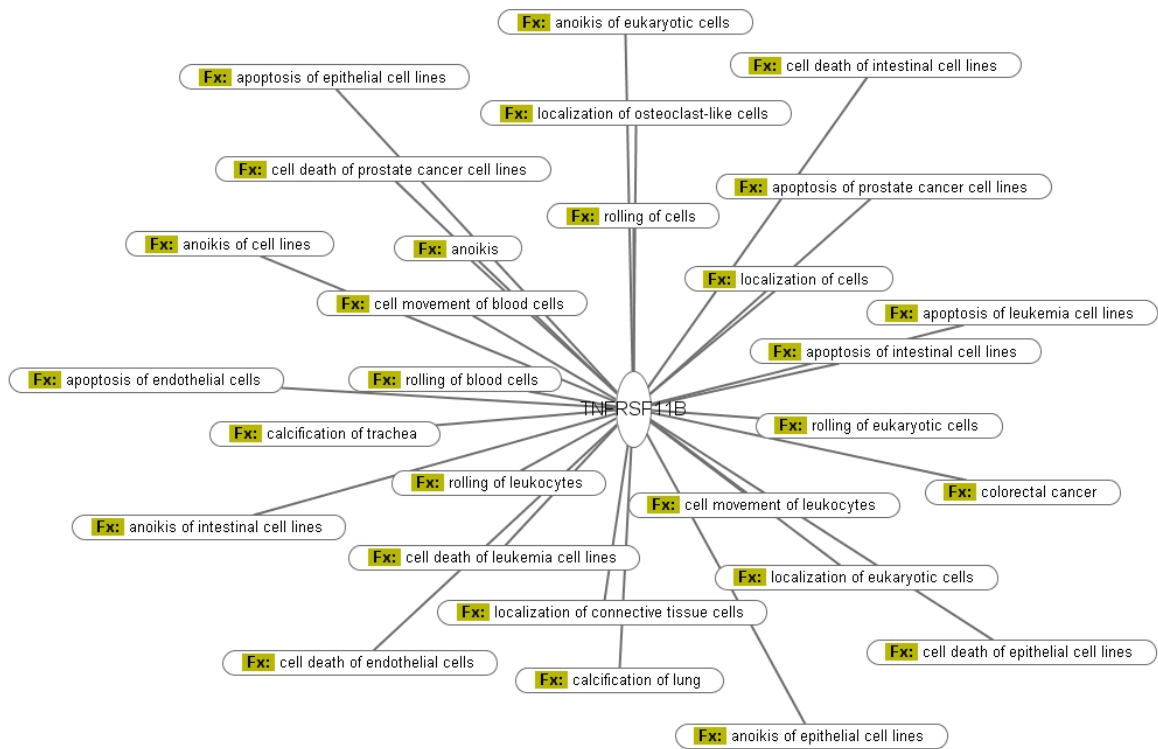

**Supplementary Table 1.** Clinical and pathological characteristics of lung cancer patients for Osteoprotegerin measurement by ELISA

|                              | <b>Controls</b> | <b>Cases</b> |
|------------------------------|-----------------|--------------|
| <b>Smoking status</b>        |                 |              |
| Yes                          | 07              | 17           |
| No <sup>1</sup>              | 17              | 08           |
| x <sup>2</sup>               | 01              |              |
| <b>Gender</b>                |                 |              |
| Female                       | 15              | 10           |
| Male                         | 10              | 15           |
| <b>Age</b>                   |                 |              |
| Mean                         | 42              | 62           |
| SD                           | 09              | 14           |
| <b>Stage</b>                 |                 |              |
| III                          |                 | 03           |
| IV                           |                 | 22           |
| <b>Histology<sup>3</sup></b> |                 |              |
| ADC                          |                 | 08           |
| SCC                          |                 | 06           |
| BAC                          |                 | 01           |
| LCC                          |                 | 01           |
| Unspecified NSCLC            |                 | 09           |

All patients had unresectable stage III or IV NSCLC at the time of sample collection. Surgical procedures occurred >1 year before specimen collection.

<sup>1</sup>. < 100 cigarettes/lifetime.

<sup>2</sup>. x, unknown.

<sup>3</sup>. ADC, adenocarcinoma; SCC, squamous cell carcinoma; BAC, bronchioloalveolar carcinoma; LCC, large cell carcinoma; NSCLC, non-small cell lung carcinoma.

**Supplementary Table 2.** Clinical and pathological characteristics of lung cancer patients for sTNF RI measurement by ELISA

|                              | <b>Controls</b> | <b>Cases</b> |
|------------------------------|-----------------|--------------|
| <b>Smoking status</b>        |                 |              |
| Yes                          | 07              | 16           |
| No <sup>1</sup>              | 14              | 09           |
| x <sup>2</sup>               | 04              |              |
| <b>Gender</b>                |                 |              |
| Female                       | 08              | 11           |
| Male                         | 17              | 14           |
| <b>Age</b>                   |                 |              |
| Mean                         | 36              | 62           |
| SD                           | 08              | 11           |
| <b>Stage</b>                 |                 |              |
| III                          |                 | 04           |
| IV                           |                 | 20           |
| x <sup>2</sup>               |                 | 01           |
| <b>Histology<sup>3</sup></b> |                 |              |
| ADC                          |                 | 14           |
| SCC                          |                 | 04           |
| BAC                          |                 | 01           |
| Unspecified NSCLC            |                 | 06           |

All patients had unresectable stage III or IV NSCLC at the time of sample collection. Surgical procedures occurred >1 year before specimen collection.

<sup>1</sup>. < 100 cigarettes/lifetime.

<sup>2</sup>. x, unknown.

<sup>3</sup>. ADC, adenocarcinoma; SCC, squamous cell carcinoma; BAC, bronchioloalveolar carcinoma; NSCLC, non-small cell lung carcinoma.

**Supplementary Table 3.** Clinical and pathological characteristics of lung cancer patients for Follistatin measurement by ELISA

|                              | <b>Controls</b> | <b>Cases</b> |
|------------------------------|-----------------|--------------|
| <b>Smoking status</b>        |                 |              |
| Yes                          | 07              | 17           |
| No <sup>1</sup>              | 17              | 08           |
| x <sup>2</sup>               | 01              |              |
| <b>Gender</b>                |                 |              |
| Female                       | 15              | 10           |
| Male                         | 10              | 15           |
| <b>Age</b>                   |                 |              |
| Mean                         | 42              | 62           |
| SD                           | 09              | 14           |
| <b>Stage</b>                 |                 |              |
| III                          |                 | 02           |
| IV                           |                 | 23           |
| <b>Histology<sup>3</sup></b> |                 |              |
| ADC                          |                 | 08           |
| SCC                          |                 | 06           |
| LCC                          |                 | 01           |
| Unspecified NSCLC            |                 | 10           |

All patients had unresectable stage III or IV NSCLC at the time of sample collection. Surgical procedures occurred >1 year before specimen collection.

<sup>1</sup>. < 100 cigarettes/lifetime.

<sup>2</sup>. x, unknown.

<sup>3</sup>. ADC, adenocarcinoma; SCC, squamous cell carcinoma; LCC, large cell carcinoma; NSCLC, non-small cell lung carcinoma.

**Supplementary Table 4.** Clinical and pathological characteristics of lung cancer patients for ADAM-17 measurement by ELISA

|                              | <b>Controls</b> | <b>Cases</b> |
|------------------------------|-----------------|--------------|
| <b>Smoking status</b>        |                 |              |
| Yes                          | 04              | 15           |
| No <sup>1</sup>              | 16              | 06           |
| x <sup>2</sup>               | 01              |              |
| <b>Gender</b>                |                 |              |
| Female                       | 14              | 08           |
| Male                         | 07              | 13           |
| <b>Age</b>                   |                 |              |
| Mean                         | 41              | 61           |
| SD                           | 09              | 13           |
| <b>Stage</b>                 |                 |              |
| III                          |                 | 03           |
| IV                           |                 | 18           |
| <b>Histology<sup>3</sup></b> |                 |              |
| ADC                          |                 | 07           |
| SCC                          |                 | 06           |
| BAC                          |                 | 01           |
| LCC                          |                 | 01           |
| Unspecified NSCLC            |                 | 06           |

All patients had unresectable stage III or IV NSCLC at the time of sample collection. Surgical procedures occurred >1 year before specimen collection.

<sup>1</sup>. < 100 cigarettes/lifetime.

<sup>2</sup>. x, unknown.

<sup>3</sup>. ADC, adenocarcinoma; SCC, squamous cell carcinoma; BAC, bronchioloalveolar carcinoma; LCC, large cell carcinoma; NSCLC, non-small cell lung carcinoma.

**Supplementary Table 5.** Clinical and pathological characteristics of lung cancer patients for Pentraxin 3 by ELISA

|                              | <b>Controls</b> | <b>Cases</b> |
|------------------------------|-----------------|--------------|
| <b>Smoking status</b>        |                 |              |
| Yes                          | 08              | 19           |
| No <sup>1</sup>              | 15              | 06           |
| x <sup>2</sup>               | 02              |              |
| <b>Gender</b>                |                 |              |
| Female                       | 08              | 12           |
| Male                         | 17              | 13           |
| <b>Age</b>                   |                 |              |
| Mean                         | 34              | 64           |
| SD                           | 09              | 10           |
| <b>Stage</b>                 |                 |              |
| III                          |                 | 05           |
| IV                           |                 | 19           |
| x <sup>2</sup>               |                 | 01           |
| <b>Histology<sup>3</sup></b> |                 |              |
| ADC                          |                 | 10           |
| SCC                          |                 | 06           |
| Unspecified NSCLC            |                 | 09           |

All patients had unresectable stage III or IV NSCLC at the time of sample collection. Surgical procedures occurred >1 year before specimen collection.

<sup>1</sup>. < 100 cigarettes/lifetime.

<sup>2</sup>. x, unknown.

<sup>3</sup>. ADC, adenocarcinoma; SCC, squamous cell carcinoma; NSCLC, non-small cell lung carcinoma.

## **Supplementary Figures**

### **Supplementary Figure 1: Optimization of seeding density for H520.**

A, IGFBP2 levels measured in CM at different seeding densities (8, 12 and 16 million cells); B, LDH levels measured in CM at different seeding densities (8, 12 and 16 million cells); C, IGFBP2 / LDH ratio calculated at different seeding densities (8, 12 and 16 million cells).

### **Supplementary Figure 2: Optimization of seeding density for H460.**

A, IGFBP2 levels measured in CM at different seeding densities (1, 2 and 4 million cells); B, LDH levels measured in CM at different seeding densities (1, 2 and 4 million cells); C, IGFBP2 / LDH ratio calculated at different seeding densities (1, 2 and 4 million cells).

### **Supplementary Figure 3: Optimization of seeding density for H23.**

A, IGFBP2 levels measured in CM at different seeding densities (2, 4 and 8 million cells); B, LDH levels measured in CM at different seeding densities (2, 4 and 8 million cells); C, IGFBP2 / LDH ratio calculated at different seeding densities (2, 4 and 8 million cells).

### **Supplementary Figure 4: Optimization of seeding density for H1688.**

A, IGFBP2, KLK11 and KLK14 levels measured in CM at different seeding densities (5 and 10 million cells); B, LDH levels measured in CM at different seeding densities (5 and 10 million cells); C, IGFBP2, KLK11, KLK14 / LDH ratio calculated at different seeding densities (5 and 10 million cells).

### **Supplementary Figure 5: Identification of internal control proteins by LC MS/MS.**

H1688 expresses IGFBP2 and kallikrein-related peptidases 11 and 14 (KLK11 and KLK14) in concentrations ranging from approximately 2-35 µg/L, as measured by ELISA. The sequences of the respective proteins are indicated (A) IGFBP2, (B) KLK11, (C) KLK14. The peptides identified by MS in the CM of H1688 are highlighted in yellow.

**Supplementary Figure 6: Molecular functions related to diseases associated with Follistatin.**

The web diagram generated through IPA software depicts the biological functions that Follistatin is associated with, in the context of disease.

**Supplementary Figure 7: Molecular functions related to diseases associated with Pentraxin 3 (PTX3).**

The web diagram generated through IPA software depicts the biological functions that PTX3 is associated with, in the context of disease.

**Supplementary Figure 8: Molecular functions related to diseases associated with TNFRSF1A.**

The web diagram generated through IPA software depicts the biological functions that TNFRSF1A is associated with, in the context of disease.

**Supplementary Figure 9: Molecular functions related to diseases associated with Osteoprotegerin (TNFRSF11B).**

The web diagram generated through IPA software depicts the biological functions that Osteoprotegerin is associated with, in the context of disease.
